# Supplementary material for: The Effects of Earphone Use and Environmental Lead Exposure on Hearing Loss in the Korean Population: Data Analysis of the Korea National Health and Nutrition Examination Survey (KNHANES), 2010–2013
Source: PLoS One. 2016 Dec 28;11(12):e0168718. doi: 10.1371/journal.pone.0168718 (PMC5193416; doi:10.1371/journal.pone.0168718)
Supplement: S2 File — This data contains the information about audiometric measurement. (XLSX) [file pone.0168718.s003.xlsx]

## Sheet: HN10_ENT
ID	ID_fam	year	region	town_t	apt_t	psu	sex	age	age_month	incm	ho_incm	edu	occp	wt_hs	wt_itvex	wt_pft	wt_hm	wt_ntr	wt_tot	wt_pfhm	wt_pfnt	wt_hmnt	wt_pfhmnt	kstrata	kstrata0	T_ex	T_Q_ardg	T_Q_arpt	T_Q_DZ	T_Q_DZ1	T_Q_DZ2	T_Q_VC	T_Q_VC1	T_Q_HR	T_Q_HR1	T_Q_VN	T_Q_VN1	T_Q_CR	T_Q_CR1	T_Q_CR2	T_Q_CR3	T_Q_CR4	T_Q_SNST1	T_Q_SNST2	T_Q_SNST3	T_Q_SNST4	T_NC_ansm	T_VCds	T_NQ_PH
A901963701	A901963	2010	1	1	2	A901	1	55	#NULL!	4	4	4	7	4426.17	4207.32	5388.05	6686.6	4727.89	4462.72	13837.4	6043.99	7155.15	15901.6	501	501	1	1	2	2	8	8	2	8	1	8	2	8	1	1	1	2	1	1	1	1	1	0	0	2
A901963702	A901963	2010	1	1	2	A901	2	49	#NULL!	4	4	4	7	4426.17	5658.06	5810.87	#NULL!	6024.62	4523.68	#NULL!	6183.64	#NULL!	#NULL!	501	501	1	2	8	2	8	8	2	8	1	8	2	8	1	1	1	1	2	1	1	1	1	0	0	2
A901963703	A901963	2010	1	1	2	A901	2	23	#NULL!	4	4	3	7	4426.17	5024.36	#NULL!	8057.93	6403.87	7164.62	#NULL!	#NULL!	9743.19	#NULL!	501	501	1	2	8	8	8	8	2	8	1	8	1	2	1	2	2	2	2	1	1	1	1	0	0	1
A901963801	A901963	2010	1	1	2	A901	1	33	#NULL!	2	3	4	1	4426.17	7459.25	#NULL!	#NULL!	#NULL!	#NULL!	#NULL!	#NULL!	#NULL!	#NULL!	501	501	1	2	8	8	8	8	2	8	1	8	2	8	2	8	8	8	8	1	1	1	1	0	0	1
A901963802	A901963	2010	1	1	2	A901	2	35	#NULL!	2	3	4	7	4426.17	4267.35	#NULL!	#NULL!	8771.69	5777.4	#NULL!	#NULL!	#NULL!	#NULL!	501	501	1	2	8	8	8	8	2	8	1	8	2	8	2	8	8	8	8	1	1	1	1	0	0	2
A901963804	A901963	2010	1	1	2	A901	2	3	44	2	3	1	#NULL!	4426.17	3575.08	#NULL!	#NULL!	3676.65	3942.16	#NULL!	#NULL!	#NULL!	#NULL!	501	501	1	8	8	8	8	8	8	8	8	8	8	8	8	8	8	8	8	8	8	8	8	#NULL!	#NULL!	8
A901964102	A901964	2010	1	1	2	A901	2	47	#NULL!	2	2	3	7	4426.17	5658.06	5810.87	14684.4	6024.62	4523.68	11547.9	6183.64	10184.3	12836	501	501	1	2	8	2	8	8	2	8	1	8	2	8	2	8	8	8	8	1	1	1	1	0	0	2
A901964103	A901964	2010	1	1	2	A901	2	21	#NULL!	2	2	3	7	4426.17	5024.36	#NULL!	#NULL!	6403.87	7164.62	#NULL!	#NULL!	#NULL!	#NULL!	501	501	1	9	9	8	8	8	9	9	9	9	9	9	9	9	9	9	9	9	9	9	9	#NULL!	#NULL!	9
A901964104	A901964	2010	1	1	2	A901	2	16	#NULL!	2	2	2	7	4426.17	8823.02	#NULL!	7293.66	8119.06	6355.2	#NULL!	#NULL!	8061.72	#NULL!	501	501	1	9	9	8	8	8	8	8	9	9	9	9	9	9	9	9	9	9	9	9	9	#NULL!	#NULL!	9
A901965801	A901965	2010	1	1	2	A901	1	44	#NULL!	3	3	4	3	4426.17	5897.84	6249.55	8545.08	8277.88	10808.7	12736.2	7899.24	20490.2	17697.4	501	501	1	2	8	2	8	8	2	8	1	8	2	8	2	8	8	8	8	1	1	1	1	0	0	2
A901965802	A901965	2010	1	1	2	A901	2	44	#NULL!	3	3	4	7	4426.17	5480.7	6975.6	11537.2	7286.69	6807.33	15584.1	6487.68	18585.7	16134.7	501	501	1	2	8	2	8	8	2	8	1	8	2	8	1	2	1	1	2	1	1	1	1	0	0	2
A901965804	A901965	2010	1	1	2	A901	2	14	#NULL!	3	3	1	#NULL!	4426.17	8275.83	#NULL!	#NULL!	5426.49	5351.06	#NULL!	#NULL!	#NULL!	#NULL!	501	501	1	2	8	8	8	8	8	8	1	8	2	8	2	8	8	8	8	1	1	1	1	0	#NULL!	2
A901966101	A901966	2010	1	1	2	A901	1	60	#NULL!	2	3	2	5	4426.17	3034.18	3982.05	#NULL!	2875.3	3043.44	#NULL!	4336.13	#NULL!	#NULL!	501	501	1	2	8	2	8	8	1	2	1	8	2	8	2	8	8	8	8	1	1	1	1	0	1	2
A901966102	A901966	2010	1	1	2	A901	2	56	#NULL!	2	3	1	6	4426.17	3767.14	3106.22	#NULL!	3605.09	2792.19	#NULL!	3239.06	#NULL!	#NULL!	501	501	1	2	8	1	3	2	2	8	3	3	1	2	2	8	8	8	8	1	1	1	1	0	0	2
A901966104	A901966	2010	1	1	2	A901	1	28	#NULL!	2	3	4	1	4426.17	8955.28	#NULL!	13644.5	10478.7	11447.5	#NULL!	#NULL!	16803.2	#NULL!	501	501	1	1	2	8	8	8	2	8	1	8	2	8	1	1	1	1	2	1	1	1	1	0	0	1
A901966201	A901966	2010	1	1	2	A901	1	37	#NULL!	4	4	4	1	4426.17	6129.86	#NULL!	#NULL!	7454.05	8256.22	#NULL!	#NULL!	#NULL!	#NULL!	501	501	1	2	8	8	8	8	2	8	1	8	2	8	2	8	8	8	8	1	1	1	1	0	0	2
A901966202	A901966	2010	1	1	2	A901	2	34	#NULL!	4	4	4	1	4426.17	5230.58	#NULL!	#NULL!	4722.45	5024.24	#NULL!	#NULL!	#NULL!	#NULL!	501	501	1	1	2	8	8	8	2	8	1	8	2	8	1	2	1	1	2	1	1	1	1	0	0	1
A901966203	A901966	2010	1	1	2	A901	2	6	73	3	4	1	#NULL!	4426.17	2823.3	#NULL!	#NULL!	2864.08	3221.68	#NULL!	#NULL!	#NULL!	#NULL!	501	501	1	2	8	8	8	8	8	8	8	8	8	8	2	8	8	8	8	1	1	1	1	0	#NULL!	8
A901966204	A901966	2010	1	1	2	A901	1	3	43	4	4	1	#NULL!	4426.17	3889	#NULL!	#NULL!	3982.59	3339.17	#NULL!	#NULL!	#NULL!	#NULL!	501	501	1	8	8	8	8	8	8	8	8	8	8	8	8	8	8	8	8	8	8	8	8	#NULL!	#NULL!	8
A901967501	A901967	2010	1	1	2	A901	1	33	#NULL!	3	3	3	4	4426.17	7459.25	#NULL!	#NULL!	12221.5	10637	#NULL!	#NULL!	#NULL!	#NULL!	501	501	1	2	8	8	8	8	2	8	1	8	2	8	2	8	8	8	8	1	1	1	1	0	0	2
A901967502	A901967	2010	1	1	2	A901	2	33	#NULL!	2	3	4	1	4426.17	5230.58	#NULL!	#NULL!	4722.45	5024.24	#NULL!	#NULL!	#NULL!	#NULL!	501	501	1	1	2	8	8	8	2	8	1	8	2	8	2	8	8	8	8	1	1	1	1	0	0	2
A901968401	A901968	2010	1	1	2	A901	1	61	#NULL!	2	2	3	5	4426.17	3034.18	7964.1	#NULL!	5750.59	6086.88	#NULL!	8672.27	#NULL!	#NULL!	501	501	1	2	8	2	8	8	1	2	1	8	2	8	2	8	8	8	8	1	1	1	1	0	1	2
A901968402	A901968	2010	1	1	2	A901	2	54	#NULL!	2	2	2	3	4426.17	3730.03	#NULL!	15400.8	#NULL!	#NULL!	#NULL!	#NULL!	#NULL!	#NULL!	501	501	1	2	8	2	8	8	2	8	1	8	1	1	2	8	8	8	8	1	1	1	1	0	0	2
A901969101	A901969	2010	1	1	2	A901	1	65	#NULL!	3	2	1	6	4426.17	2434.56	3245.75	#NULL!	2654.01	2311.56	#NULL!	3631.76	#NULL!	#NULL!	501	501	1	2	8	1	2	2	2	8	1	8	1	1	2	8	8	8	8	1	1	1	1	0	0	2
A901969102	A901969	2010	1	1	2	A901	2	59	#NULL!	2	2	2	3	4426.17	3767.14	3106.22	#NULL!	3605.09	2792.19	#NULL!	3239.06	#NULL!	#NULL!	501	501	1	2	8	2	8	8	2	8	2	3	2	8	2	8	8	8	8	1	1	1	1	0	0	2
A901969801	A901969	2010	1	1	2	A901	1	54	#NULL!	1	2	2	7	4426.17	7385.46	7174.06	16617.1	8496.84	7536.42	23797.8	8962.54	15528.8	31337.6	501	501	1	2	8	2	8	8	2	8	1	8	2	8	1	2	2	1	2	1	1	1	1	0	0	2
A901969802	A901969	2010	1	1	2	A901	2	49	#NULL!	2	2	2	7	4426.17	5658.06	5810.87	#NULL!	6024.62	4523.68	#NULL!	6183.64	#NULL!	#NULL!	501	501	1	2	8	1	3	2	2	8	2	3	2	8	1	1	1	1	2	1	1	1	1	0	0	2
A901969803	A901969	2010	1	1	2	A901	1	18	#NULL!	2	2	2	7	4426.17	5342.6	#NULL!	11205.6	5793.51	7877.86	#NULL!	#NULL!	12399.4	#NULL!	501	501	1	1	2	8	8	8	8	8	1	8	1	1	1	1	2	2	1	2	2	2	1	0	#NULL!	1
A901969901	A901969	2010	1	1	2	A901	1	32	#NULL!	3	3	4	1	4426.17	7459.25	#NULL!	#NULL!	12221.5	10637	#NULL!	#NULL!	#NULL!	#NULL!	501	501	1	2	8	8	8	8	2	8	1	8	2	8	2	8	8	8	8	1	1	1	1	0	0	2
A901969902	A901969	2010	1	1	2	A901	2	32	#NULL!	3	3	4	2	4426.17	5230.58	#NULL!	#NULL!	4722.45	5024.24	#NULL!	#NULL!	#NULL!	#NULL!	501	501	1	2	8	8	8	8	2	8	1	8	2	8	1	1	2	1	1	2	1	1	1	0	0	2
A901969903	A901969	2010	1	1	2	A901	2	1	15	3	3	1	#NULL!	4426.17	3575.08	#NULL!	#NULL!	3676.65	2956.62	#NULL!	#NULL!	#NULL!	#NULL!	501	501	1	8	8	8	8	8	8	8	8	8	8	8	8	8	8	8	8	8	8	8	8	#NULL!	#NULL!	8
A901971501	A901971	2010	1	1	2	A901	1	39	#NULL!	2	3	4	2	4426.17	6129.86	#NULL!	#NULL!	#NULL!	#NULL!	#NULL!	#NULL!	#NULL!	#NULL!	501	501	1	1	2	8	8	8	2	8	2	3	2	8	1	1	2	1	2	1	1	1	1	0	0	2
A901971502	A901971	2010	1	1	2	A901	2	37	#NULL!	2	3	4	7	4426.17	4267.35	#NULL!	#NULL!	8771.69	5777.4	#NULL!	#NULL!	#NULL!	#NULL!	501	501	1	2	8	8	8	8	2	8	1	8	2	8	2	8	8	8	8	1	1	1	1	0	0	2
A901971503	A901971	2010	1	1	2	A901	2	7	#NULL!	2	3	1	#NULL!	4426.17	2823.3	#NULL!	#NULL!	2864.08	4295.57	#NULL!	#NULL!	#NULL!	#NULL!	501	501	1	2	8	8	8	8	8	8	8	8	8	8	2	8	8	8	8	1	1	1	1	0	#NULL!	8
A901971504	A901971	2010	1	1	2	A901	1	2	32	3	3	1	#NULL!	4426.17	3889	#NULL!	#NULL!	3982.59	4452.22	#NULL!	#NULL!	#NULL!	#NULL!	501	501	1	8	8	8	8	8	8	8	8	8	8	8	8	8	8	8	8	8	8	8	8	#NULL!	#NULL!	8
A901972401	A901972	2010	1	1	2	A901	1	32	#NULL!	2	2	3	3	4426.17	7459.25	#NULL!	#NULL!	#NULL!	#NULL!	#NULL!	#NULL!	#NULL!	#NULL!	501	501	1	2	8	8	8	8	2	8	1	8	2	8	2	8	8	8	8	1	1	1	1	0	0	2
A901972402	A901972	2010	1	1	2	A901	2	30	#NULL!	2	2	3	7	4426.17	5230.58	#NULL!	#NULL!	#NULL!	#NULL!	#NULL!	#NULL!	#NULL!	#NULL!	501	501	1	1	2	8	8	8	2	8	1	8	1	1	1	2	2	1	1	1	1	1	1	0	0	2
A901973803	A901973	2010	1	1	2	A901	2	7	#NULL!	3	4	1	#NULL!	4426.17	2823.3	#NULL!	#NULL!	2864.08	4832.52	#NULL!	#NULL!	#NULL!	#NULL!	501	501	1	2	8	8	8	8	8	8	8	8	8	8	2	8	8	8	8	1	1	1	1	0	#NULL!	8
A901973804	A901973	2010	1	1	2	A901	1	5	69	3	4	1	#NULL!	4426.17	3124.94	#NULL!	#NULL!	3234.13	4780.58	#NULL!	#NULL!	#NULL!	#NULL!	501	501	1	2	8	8	8	8	8	8	8	8	8	8	8	8	8	8	8	8	8	8	8	#NULL!	#NULL!	8
A901975001	A901975	2010	1	1	2	A901	1	37	#NULL!	3	3	4	3	4426.17	6129.86	#NULL!	7260.58	#NULL!	#NULL!	#NULL!	#NULL!	#NULL!	#NULL!	501	501	1	2	8	8	8	8	2	8	1	8	2	8	2	8	8	8	8	1	1	1	1	0	0	1
A901975002	A901975	2010	1	1	2	A901	2	36	#NULL!	3	3	4	7	4426.17	4267.35	#NULL!	7367.08	#NULL!	#NULL!	#NULL!	#NULL!	#NULL!	#NULL!	501	501	1	2	8	8	8	8	2	8	1	8	2	8	1	1	1	1	2	1	1	1	1	0	0	2
A901975003	A901975	2010	1	1	2	A901	1	4	56	3	3	1	#NULL!	4426.17	7778	#NULL!	#NULL!	#NULL!	#NULL!	#NULL!	#NULL!	#NULL!	#NULL!	501	501	1	1	1	8	8	8	8	8	8	8	8	8	8	8	8	8	8	8	8	8	8	#NULL!	#NULL!	8
A901976101	A901976	2010	1	1	2	A901	1	27	#NULL!	4	4	4	1	4426.17	8955.28	#NULL!	6822.26	10478.7	11447.5	#NULL!	#NULL!	8401.61	#NULL!	501	501	1	1	2	8	8	8	2	8	1	8	2	8	2	8	8	8	8	1	1	1	1	0	0	2
A901976102	A901976	2010	1	1	2	A901	2	27	#NULL!	4	4	4	1	4426.17	8093.01	#NULL!	5208.66	7575.02	6273.79	#NULL!	#NULL!	5825.79	#NULL!	501	501	1	2	8	8	8	8	2	8	1	8	2	8	1	1	1	1	2	1	1	1	1	0	0	2
A901977501	A901977	2010	1	1	2	A901	1	74	#NULL!	3	2	3	3	4426.17	2174.94	6999.59	22739.1	2356.87	2186.76	99805.2	6962.74	22792.8	103759	501	501	1	2	8	2	8	8	2	8	2	3	2	8	2	8	8	8	8	1	1	1	1	0	0	2
A901977502	A901977	2010	1	1	2	A901	2	73	#NULL!	3	2	1	7	4426.17	2739	#NULL!	67676.8	2359.56	2358	#NULL!	#NULL!	74093.6	#NULL!	501	501	1	2	8	1	3	2	1	2	2	3	2	8	1	1	1	1	2	1	1	1	1	0	1	2
A901978801	A901978	2010	1	1	2	A901	1	79	#NULL!	1	1	1	7	4426.17	4878.39	#NULL!	#NULL!	2881.98	5426.61	#NULL!	#NULL!	#NULL!	#NULL!	501	501	1	1	2	2	8	8	2	8	2	3	2	8	1	1	2	1	2	1	1	1	2	1	0	2
A902968402	A902968	2010	1	1	1	A902	1	69	#NULL!	4	3	4	7	8850.07	12169.7	#NULL!	22784.6	13266.7	11554.8	#NULL!	#NULL!	24856.2	#NULL!	512	517	1	2	8	2	8	8	2	8	1	8	2	8	2	8	8	8	8	1	1	1	1	0	0	2
A902968601	A902968	2010	1	1	1	A902	1	80	#NULL!	2	1	1	7	8850.07	4064.29	#NULL!	#NULL!	4802.08	4521.02	#NULL!	#NULL!	#NULL!	#NULL!	512	517	1	2	8	2	8	8	1	2	1	8	1	1	2	8	8	8	8	1	1	1	1	0	1	2
A902968602	A902968	2010	1	1	1	A902	2	71	#NULL!	2	1	1	7	8850.07	4563.83	#NULL!	#NULL!	3931.6	3929	#NULL!	#NULL!	#NULL!	#NULL!	512	517	1	2	8	2	8	8	2	8	1	8	2	8	2	8	8	8	8	1	1	1	1	0	0	2
A902968902	A902968	2010	1	1	1	A902	2	69	#NULL!	4	3	1	6	8850.07	15732.3	#NULL!	34125.4	4457.54	16994.8	#NULL!	#NULL!	33812.2	#NULL!	512	517	1	2	8	2	8	8	2	8	1	8	2	8	2	8	8	8	8	2	1	1	1	0	0	2
A902969501	A902969	2010	1	1	1	A902	1	69	#NULL!	4	3	1	3	8850.07	4056.56	10816.4	#NULL!	4422.23	3851.61	#NULL!	12102.8	#NULL!	#NULL!	512	517	1	2	8	2	8	8	1	2	1	8	2	8	1	1	2	2	1	1	1	1	1	0	1	2
A902969502	A902969	2010	1	1	1	A902	2	71	#NULL!	4	3	1	7	8850.07	4563.83	#NULL!	#NULL!	3931.6	3929	#NULL!	#NULL!	#NULL!	#NULL!	512	517	1	2	8	1	2	1	1	2	1	8	2	8	1	2	1	1	2	1	1	1	1	0	1	2
A902969801	A902969	2010	1	1	1	A902	1	49	#NULL!	2	3	4	3	8850.07	15697	12652	#NULL!	17353	15662	#NULL!	16768.4	#NULL!	#NULL!	512	517	1	2	8	2	8	8	2	8	1	8	2	8	2	8	8	8	8	1	1	1	1	0	0	2
A902969802	A902969	2010	1	1	1	A902	2	44	#NULL!	2	3	3	2	8850.07	9132.17	11623	38447.6	9106.03	8506.99	51933.7	10810	59757.8	53768.5	512	517	1	1	1	2	8	8	2	8	1	8	2	8	1	1	2	2	1	1	1	1	1	0	0	2
A902969803	A902969	2010	1	1	1	A902	1	18	#NULL!	2	3	3	7	8850.07	8902.05	#NULL!	#NULL!	9653.39	13126.4	#NULL!	#NULL!	#NULL!	#NULL!	512	517	1	2	8	8	8	8	8	8	1	8	1	2	1	2	1	1	1	1	1	1	1	0	#NULL!	2
A902969804	A902969	2010	1	1	1	A902	1	16	#NULL!	2	3	2	7	8850.07	8902.05	#NULL!	#NULL!	9653.39	13126.4	#NULL!	#NULL!	#NULL!	#NULL!	512	517	1	2	8	8	8	8	8	8	1	8	2	8	1	1	2	2	1	1	1	1	1	0	#NULL!	2
A902970401	A902970	2010	1	1	1	A902	2	68	#NULL!	2	1	1	7	8850.07	6930.8	#NULL!	#NULL!	7132.06	11446.2	#NULL!	#NULL!	#NULL!	#NULL!	512	517	1	2	8	1	3	2	2	8	1	8	2	8	2	8	8	8	8	1	1	1	1	0	0	2
A902971801	A902971	2010	1	1	1	A902	1	57	#NULL!	3	3	1	3	8850.07	14020.8	8977.78	29710.6	15755.6	14871.9	23056.5	10070.7	31792.6	26495.8	512	517	1	2	8	2	8	8	2	8	1	8	1	1	2	8	8	8	8	1	1	1	1	0	0	2
A902971802	A902971	2010	1	1	1	A902	2	51	#NULL!	3	3	2	6	8850.07	12430.3	6681.05	#NULL!	13092.6	12045.8	#NULL!	6991.83	#NULL!	#NULL!	512	517	1	2	8	2	8	8	2	8	1	8	2	8	2	8	8	8	8	1	1	1	1	0	0	2
A902971901	A902971	2010	1	1	1	A902	2	60	#NULL!	#NULL!	#NULL!	3	3	8850.07	4735.41	5093.16	11180.1	4734.23	4289.71	19655.5	5330.84	10793	19834.8	512	517	1	2	8	1	3	2	2	8	1	8	1	1	2	8	8	8	8	1	1	1	1	0	0	2
A902971902	A902971	2010	1	1	1	A902	2	36	#NULL!	#NULL!	#NULL!	4	1	8850.07	7110.44	#NULL!	12275.3	7307.87	7219.91	#NULL!	#NULL!	11207.1	#NULL!	512	517	1	1	1	8	8	8	2	8	1	8	2	8	1	1	1	2	2	1	1	1	1	0	0	2
A902973501	A902973	2010	1	1	1	A902	2	24	#NULL!	1	2	3	2	8850.07	8371.8	#NULL!	8950.97	#NULL!	#NULL!	#NULL!	#NULL!	#NULL!	#NULL!	512	517	1	2	8	8	8	8	2	8	1	8	2	8	2	8	8	8	8	1	1	1	1	0	0	1
A902974201	A902974	2010	1	1	1	A902	2	61	#NULL!	3	2	3	7	8850.07	4735.41	5093.16	#NULL!	4734.23	4289.71	#NULL!	5330.84	#NULL!	#NULL!	512	517	1	9	9	1	2	2	1	2	1	8	2	8	2	8	8	8	8	1	1	1	1	0	1	2
A902974202	A902974	2010	1	1	1	A902	1	32	#NULL!	2	2	3	5	8850.07	12428.9	#NULL!	34403.1	18156.7	17723.8	#NULL!	#NULL!	53552.2	#NULL!	512	517	1	2	8	8	8	8	2	8	1	8	1	1	1	1	2	2	2	1	1	1	1	0	0	2
A902974901	A902974	2010	1	1	1	A902	1	64	#NULL!	4	4	4	7	8850.07	10111.4	6635.06	14807.9	9581.87	10142.2	13816.6	7225.04	16415.8	14201.3	512	517	1	1	2	2	8	8	2	8	1	8	1	1	1	1	2	2	2	1	1	1	1	0	0	2
A902974902	A902974	2010	1	1	1	A902	2	59	#NULL!	4	4	4	1	8850.07	12553.9	5175.71	15606	12013.9	9304.94	11804.8	5397.05	16512.3	12719.2	512	517	1	2	8	2	8	8	2	8	1	8	2	8	1	1	2	1	2	1	1	1	1	0	0	2
A902975901	A902975	2010	1	1	1	A902	1	39	#NULL!	4	4	4	2	8850.07	10213.8	#NULL!	#NULL!	12420.2	13756.8	#NULL!	#NULL!	#NULL!	#NULL!	512	517	1	1	1	8	8	8	2	8	1	8	1	1	1	2	1	1	2	1	1	1	1	0	0	2
A902975902	A902975	2010	1	1	1	A902	2	35	#NULL!	4	4	3	7	8850.07	7110.44	#NULL!	#NULL!	7307.87	7219.91	#NULL!	#NULL!	#NULL!	#NULL!	512	517	1	1	2	8	8	8	2	8	1	8	2	8	1	2	2	2	2	2	1	1	1	0	0	2
A902975903	A902975	2010	1	1	1	A902	2	9	#NULL!	4	4	1	#NULL!	8850.07	4704.3	#NULL!	#NULL!	4772.24	5368.1	#NULL!	#NULL!	#NULL!	#NULL!	512	517	1	2	8	8	8	8	8	8	8	8	8	8	1	2	2	2	2	1	1	1	1	0	#NULL!	8
A902975904	A902975	2010	1	1	1	A902	2	6	83	4	4	1	#NULL!	8850.07	4704.3	#NULL!	#NULL!	4772.24	5368.1	#NULL!	#NULL!	#NULL!	#NULL!	512	517	1	2	8	8	8	8	8	8	8	8	8	8	2	8	8	8	8	1	1	1	1	0	#NULL!	8
A902976601	A902976	2010	1	1	1	A902	1	43	#NULL!	4	4	4	2	8850.07	9827.23	10413.3	28476.3	10344.7	13507.4	21221.6	13162	25606.2	29488.1	512	517	1	2	8	2	8	8	2	8	1	8	2	8	1	1	1	1	2	1	1	1	1	0	0	2
A902976602	A902976	2010	1	1	1	A902	2	39	#NULL!	4	4	4	7	8850.07	7110.44	#NULL!	#NULL!	7307.87	7219.91	#NULL!	#NULL!	#NULL!	#NULL!	512	517	1	2	8	8	8	8	2	8	1	8	2	8	2	8	8	8	8	1	1	1	1	0	0	2
A902976603	A902976	2010	1	1	1	A902	1	12	#NULL!	4	4	1	#NULL!	8850.07	7757.93	#NULL!	14383.6	7008.34	6576.06	#NULL!	#NULL!	11560.6	#NULL!	512	517	1	2	8	8	8	8	8	8	1	8	2	8	2	8	8	8	8	1	1	1	1	0	#NULL!	9
A902976604	A902976	2010	1	1	1	A902	2	9	#NULL!	4	4	1	#NULL!	8850.07	4704.3	#NULL!	#NULL!	4772.24	5368.1	#NULL!	#NULL!	#NULL!	#NULL!	512	517	1	1	2	8	8	8	8	8	8	8	8	8	1	2	1	2	1	2	1	1	1	0	#NULL!	8
A902977202	A902977	2010	1	1	1	A902	2	40	#NULL!	4	4	4	7	8850.07	9132.17	#NULL!	19223.8	9106.03	8506.99	#NULL!	#NULL!	15484.1	#NULL!	512	517	1	2	8	2	8	8	2	8	1	8	2	8	2	8	8	8	8	1	1	1	1	0	0	2
A902977203	A902977	2010	1	1	1	A902	2	9	#NULL!	4	4	1	#NULL!	8850.07	4704.3	#NULL!	#NULL!	4772.24	5368.1	#NULL!	#NULL!	#NULL!	#NULL!	512	517	1	1	2	8	8	8	8	8	8	8	8	8	2	8	8	8	8	1	1	1	1	0	#NULL!	8
A902977701	A902977	2010	1	1	1	A902	1	70	#NULL!	1	1	4	7	8850.07	7247.95	11663	#NULL!	3927.12	7287.33	#NULL!	11601.6	#NULL!	#NULL!	512	517	1	2	8	2	8	8	2	8	1	8	2	8	2	8	8	8	8	1	1	1	1	0	0	2
A903969901	A903969	2010	1	1	1	A903	1	37	#NULL!	1	2	4	2	5585.73	8165.52	#NULL!	19343.5	#NULL!	#NULL!	#NULL!	#NULL!	#NULL!	#NULL!	512	517	1	2	8	8	8	8	2	8	1	8	2	8	1	1	2	2	2	1	1	1	1	0	0	2
A903969902	A903969	2010	1	1	1	A903	2	39	#NULL!	1	2	4	7	5585.73	5684.5	#NULL!	#NULL!	11684.7	7696.02	#NULL!	#NULL!	#NULL!	#NULL!	512	517	1	2	8	8	8	8	2	8	2	3	2	8	2	8	8	8	8	1	1	1	1	0	0	2
A903969903	A903969	2010	1	1	1	A903	2	4	52	1	2	1	#NULL!	5585.73	4762.33	#NULL!	#NULL!	4897.63	5251.31	#NULL!	#NULL!	#NULL!	#NULL!	512	517	1	2	8	8	8	8	8	8	8	8	8	8	8	8	8	8	8	8	8	8	8	#NULL!	#NULL!	8
A903969904	A903969	2010	1	1	1	A903	2	1	20	1	2	1	#NULL!	5585.73	4762.33	#NULL!	#NULL!	4897.63	5251.31	#NULL!	#NULL!	#NULL!	#NULL!	512	517	1	8	8	8	8	8	8	8	8	8	8	8	8	8	8	8	8	8	8	8	8	#NULL!	#NULL!	8
A903970301	A903970	2010	1	1	1	A903	1	44	#NULL!	2	3	4	3	5585.73	11784.7	12487.4	34148.4	11026.9	13498.3	50897.4	15783.7	34118.5	70723.5	512	517	1	1	9	1	3	1	1	2	1	8	2	8	2	8	8	8	8	1	1	1	1	0	1	2
A903970302	A903970	2010	1	1	1	A903	2	42	#NULL!	2	3	3	3	5585.73	10951.2	13938.2	#NULL!	9706.52	8501.22	#NULL!	12963.3	#NULL!	#NULL!	512	517	1	2	8	1	3	2	2	8	1	8	2	8	2	8	8	8	8	1	1	1	1	0	0	2
A903970303	A903970	2010	1	1	1	A903	1	12	#NULL!	2	3	1	#NULL!	5585.73	6202.14	#NULL!	#NULL!	7470.49	6571.61	#NULL!	#NULL!	#NULL!	#NULL!	512	517	1	1	1	8	8	8	8	8	1	8	2	8	1	2	2	2	1	2	2	1	1	0	#NULL!	2
A903970304	A903970	2010	1	1	1	A903	2	10	#NULL!	3	3	1	#NULL!	5585.73	5512.07	#NULL!	19425.4	5421.43	6682.59	#NULL!	#NULL!	13719.4	#NULL!	512	517	1	2	8	8	8	8	8	8	8	8	8	8	2	8	8	8	8	1	1	1	1	0	#NULL!	8
A903970701	A903970	2010	1	1	1	A903	2	63	#NULL!	4	4	1	7	5585.73	3785.76	4071.77	#NULL!	3784.81	3429.45	#NULL!	4261.78	#NULL!	#NULL!	512	517	1	2	8	2	8	8	2	8	2	3	2	8	2	8	8	8	8	1	1	1	1	0	0	2
A903970802	A903970	2010	1	1	1	A903	2	34	#NULL!	1	2	4	7	5585.73	13935.2	#NULL!	24660.9	6290.72	8923.66	#NULL!	#NULL!	24525	#NULL!	512	517	1	1	2	8	8	8	2	8	1	8	2	8	1	2	2	2	2	2	1	1	1	0	0	2
A903970803	A903970	2010	1	1	1	A903	1	5	65	1	2	1	#NULL!	5585.73	4162.7	#NULL!	#NULL!	4308.15	5660.58	#NULL!	#NULL!	#NULL!	#NULL!	512	517	1	2	8	8	8	8	8	8	8	8	8	8	8	8	8	8	8	8	8	8	8	#NULL!	#NULL!	8
A903970804	A903970	2010	1	1	1	A903	2	4	49	1	2	1	#NULL!	5585.73	4762.33	#NULL!	#NULL!	4897.63	5251.31	#NULL!	#NULL!	#NULL!	#NULL!	512	517	1	2	8	8	8	8	8	8	8	8	8	8	8	8	8	8	8	8	8	8	8	#NULL!	#NULL!	8
A903971501	A903971	2010	1	1	1	A903	1	49	#NULL!	4	4	2	5	5585.73	15869.9	10114.8	#NULL!	#NULL!	#NULL!	#NULL!	#NULL!	#NULL!	#NULL!	512	517	1	2	8	2	8	8	2	8	1	8	2	8	2	8	8	8	8	1	1	1	1	0	0	2
A903971502	A903971	2010	1	1	1	A903	2	48	#NULL!	3	4	1	6	5585.73	11305.6	7740.6	29341.4	17236	18077.8	30765.7	16474.3	27132.8	34197.5	512	517	1	2	8	2	8	8	2	8	1	8	1	1	1	2	2	2	2	2	1	1	1	0	0	2
A903972401	A903972	2010	1	1	1	A903	1	71	#NULL!	3	2	3	7	5585.73	2897.22	4662.04	#NULL!	3139.57	2912.96	#NULL!	4637.49	#NULL!	#NULL!	512	517	1	2	8	2	8	8	1	2	1	8	2	8	2	8	8	8	8	1	1	1	1	0	1	2
A903972402	A903972	2010	1	1	1	A903	2	69	#NULL!	3	2	1	7	5585.73	2770.44	3976.69	10912.7	2850.89	3050.26	17449.3	4120.37	10812.6	17846.1	512	517	1	2	8	2	8	8	2	8	1	8	1	1	2	8	8	8	8	1	1	1	1	0	0	2
A903972801	A903972	2010	1	1	1	A903	1	34	#NULL!	1	2	3	3	5585.73	14904.6	#NULL!	#NULL!	#NULL!	#NULL!	#NULL!	#NULL!	#NULL!	#NULL!	512	517	1	2	8	8	8	8	2	8	1	8	1	1	1	1	2	1	2	1	1	1	1	0	0	2
A903972802	A903972	2010	1	1	1	A903	2	34	#NULL!	1	2	4	7	5585.73	10451.4	#NULL!	#NULL!	16434.6	11154.6	#NULL!	#NULL!	#NULL!	#NULL!	512	517	1	2	8	8	8	8	2	8	2	3	1	2	2	8	8	8	8	1	1	1	1	0	0	2
A903972803	A903972	2010	1	1	1	A903	1	2	35	1	2	1	#NULL!	5585.73	5180.5	#NULL!	#NULL!	5305.16	7413.45	#NULL!	#NULL!	#NULL!	#NULL!	512	517	1	8	8	8	8	8	8	8	8	8	8	8	8	8	8	8	8	8	8	8	8	#NULL!	#NULL!	8
A903972804	A903972	2010	1	1	1	A903	2	1	16	1	2	1	#NULL!	5585.73	4762.33	#NULL!	#NULL!	4897.63	6564.13	#NULL!	#NULL!	#NULL!	#NULL!	512	517	1	8	8	8	8	8	8	8	8	8	8	8	8	8	8	8	8	8	8	8	8	#NULL!	#NULL!	8
A903972901	A903972	2010	1	1	1	A903	1	84	#NULL!	2	1	1	7	5585.73	3249.23	#NULL!	#NULL!	3839.06	3614.36	#NULL!	#NULL!	#NULL!	#NULL!	512	517	1	1	2	2	8	8	2	8	1	8	2	8	2	8	8	8	8	1	1	1	1	0	0	2
A903973901	A903973	2010	1	1	1	A903	1	35	#NULL!	3	3	4	7	5585.73	8165.52	#NULL!	9671.74	#NULL!	#NULL!	#NULL!	#NULL!	#NULL!	#NULL!	512	517	1	2	8	8	8	8	2	8	1	8	2	8	2	8	8	8	8	1	1	1	1	0	0	2
A903973902	A903973	2010	1	1	1	A903	2	28	#NULL!	3	3	4	2	5585.73	10780.6	#NULL!	6938.4	17359.7	12535.9	#NULL!	#NULL!	15521	#NULL!	512	517	1	1	2	8	8	8	2	8	1	8	2	8	1	2	2	2	1	2	2	1	1	0	0	2
A903973903	A903973	2010	1	1	1	A903	2	2	29	3	3	1	#NULL!	5585.73	4762.33	#NULL!	#NULL!	4897.63	5907.72	#NULL!	#NULL!	#NULL!	#NULL!	512	517	1	8	8	8	8	8	8	8	8	8	8	8	8	8	8	8	8	8	8	8	8	#NULL!	#NULL!	8
A903975301	A903975	2010	1	1	1	A903	2	52	#NULL!	1	2	1	3	5585.73	4968.73	5341.22	#NULL!	#NULL!	#NULL!	#NULL!	#NULL!	#NULL!	#NULL!	512	517	1	1	2	1	2	2	1	2	2	3	2	8	1	2	2	2	1	2	2	1	2	1	1	2
A903975302	A903975	2010	1	1	1	A903	2	26	#NULL!	1	2	3	7	5585.73	10780.6	#NULL!	13876.8	17359.7	16714.5	#NULL!	#NULL!	15521	#NULL!	512	517	1	1	2	8	8	8	2	8	1	8	2	8	1	1	1	1	2	1	1	1	1	0	0	2
A903975701	A903975	2010	1	1	1	A903	2	63	#NULL!	1	1	3	7	5585.73	3785.76	4071.77	#NULL!	3784.81	3429.45	#NULL!	4261.78	#NULL!	#NULL!	512	517	1	2	8	1	2	2	2	8	1	8	1	1	2	8	8	8	8	1	1	1	1	0	0	2
A903975702	A903975	2010	1	1	1	A903	2	17	#NULL!	1	1	2	7	5585.73	11753.1	#NULL!	29147.4	10815.3	8465.7	#NULL!	#NULL!	28637.1	#NULL!	512	517	1	2	8	8	8	8	8	8	1	8	1	1	2	8	8	8	8	1	1	1	1	0	#NULL!	1
A903975703	A903975	2010	1	1	1	A903	2	16	#NULL!	1	1	2	7	5585.73	11753.1	#NULL!	#NULL!	10815.3	8465.7	#NULL!	#NULL!	#NULL!	#NULL!	512	517	1	2	8	8	8	8	8	8	1	8	2	8	2	8	8	8	8	1	1	1	1	0	#NULL!	2
A903975704	A903975	2010	1	1	1	A903	1	13	#NULL!	1	1	1	#NULL!	5585.73	6202.14	#NULL!	#NULL!	5602.87	5257.29	#NULL!	#NULL!	#NULL!	#NULL!	512	517	1	2	8	8	8	8	8	8	1	8	1	1	2	8	8	8	8	1	1	1	1	0	#NULL!	2
A903976102	A903976	2010	1	1	1	A903	2	50	#NULL!	3	3	3	6	5585.73	14906.2	10682.4	#NULL!	7850.23	14445.1	#NULL!	11179.3	#NULL!	#NULL!	512	517	1	2	8	2	8	8	2	8	1	8	2	8	2	8	8	8	8	1	1	1	1	0	0	1
A903976401	A903976	2010	1	1	1	A903	2	77	#NULL!	1	1	1	7	5585.73	12117.2	18456.2	#NULL!	12194	13391.4	#NULL!	18855.2	#NULL!	#NULL!	512	517	1	2	8	1	2	2	2	8	1	8	2	8	1	2	1	1	2	1	1	1	1	0	0	2
A903977201	A903977	2010	1	1	1	A903	1	56	#NULL!	1	2	1	5	5585.73	5604.52	7177.36	17814.3	6297.97	5944.74	18432.7	8051.14	15885.5	21182.3	512	517	1	2	8	2	8	8	2	8	1	8	2	8	2	8	8	8	8	1	1	1	1	0	0	2
A903977202	A903977	2010	1	1	1	A903	2	57	#NULL!	1	2	3	1	5585.73	5018.16	4137.76	#NULL!	4802.3	3719.45	#NULL!	4314.71	#NULL!	#NULL!	512	517	1	2	8	2	8	8	1	2	1	8	2	8	2	8	8	8	8	1	2	1	1	0	1	2
A903977203	A903977	2010	1	1	1	A903	1	34	#NULL!	1	2	3	3	5585.73	9936.39	#NULL!	#NULL!	16280.2	14169.4	#NULL!	#NULL!	#NULL!	#NULL!	512	517	1	2	8	8	8	8	1	2	1	8	2	8	2	8	8	8	8	1	1	1	1	0	1	2
A903977204	A903977	2010	1	1	1	A903	1	16	#NULL!	1	2	2	3	5585.73	7116.82	#NULL!	29853.6	7717.48	10494	#NULL!	#NULL!	27528.6	#NULL!	512	517	1	2	8	8	8	8	8	8	1	8	1	1	1	2	1	1	1	2	2	1	1	0	#NULL!	2
A903977205	A903977	2010	1	1	1	A903	1	15	#NULL!	1	2	1	3	5585.73	7116.82	#NULL!	#NULL!	7717.48	10494	#NULL!	#NULL!	#NULL!	#NULL!	512	517	1	2	8	8	8	8	8	8	1	8	2	8	2	8	8	8	8	1	1	1	1	0	#NULL!	2
A903977501	A903977	2010	1	1	1	A903	1	58	#NULL!	4	4	4	#NULL!	5585.73	5604.52	7177.36	#NULL!	6297.97	5944.74	#NULL!	8051.14	#NULL!	#NULL!	512	517	1	2	8	2	8	8	2	8	1	8	1	1	1	1	2	2	1	1	1	1	1	0	0	2
A903977502	A903977	2010	1	1	1	A903	2	56	#NULL!	4	4	3	3	5585.73	5018.16	4137.76	12476.3	4802.3	3719.45	18874.9	4314.71	13200.9	20337	512	517	1	2	8	2	8	8	2	8	1	8	2	8	2	8	8	8	8	1	1	1	1	0	0	2
A903978201	A903978	2010	1	1	1	A903	1	53	#NULL!	4	4	2	1	5585.73	16105.9	9556.5	#NULL!	#NULL!	#NULL!	#NULL!	#NULL!	#NULL!	#NULL!	512	517	1	2	8	1	3	2	2	8	1	8	2	8	2	8	8	8	8	1	1	1	1	0	0	2
A903978202	A903978	2010	1	1	1	A903	2	50	#NULL!	4	4	2	7	5585.73	12421.8	5341.22	#NULL!	16718.1	17363.4	#NULL!	11179.3	#NULL!	#NULL!	512	517	1	2	8	2	8	8	2	8	1	8	2	8	2	8	8	8	8	1	1	1	1	0	0	2
A903978601	A903978	2010	1	1	1	A903	1	54	#NULL!	4	4	1	1	5585.73	9838.1	9556.5	#NULL!	11318.6	10039.2	#NULL!	11938.9	#NULL!	#NULL!	512	517	1	2	8	2	8	8	2	8	1	8	2	8	2	8	8	8	8	1	1	1	1	0	0	2
A903978602	A903978	2010	1	1	1	A903	2	48	#NULL!	4	4	4	7	5585.73	7537.04	7740.6	#NULL!	8025.34	6025.95	#NULL!	8237.16	#NULL!	#NULL!	512	517	1	2	8	2	8	8	2	8	1	8	2	8	1	2	2	1	2	1	1	1	1	0	0	2
A903978603	A903978	2010	1	1	1	A903	1	27	#NULL!	4	4	4	2	5585.73	11929.2	#NULL!	36351.4	13958.5	15249.1	#NULL!	#NULL!	44766.8	#NULL!	512	517	1	1	1	8	8	8	2	8	1	8	1	1	1	2	1	1	1	1	1	1	1	0	0	1
A903978604	A903978	2010	1	1	1	A903	2	24	#NULL!	4	4	4	7	5585.73	6692.9	#NULL!	#NULL!	8530.53	9543.91	#NULL!	#NULL!	#NULL!	#NULL!	512	517	1	2	8	8	8	8	2	8	1	8	2	8	2	8	8	8	8	1	1	1	1	0	0	1
A903978801	A903978	2010	1	1	1	A903	1	61	#NULL!	4	4	3	6	5585.73	4041.8	5304.45	11838.3	3830.15	4054.13	22091.6	5776.12	13123.7	22706.7	512	517	1	2	8	2	8	8	2	8	1	8	2	8	2	8	8	8	8	2	1	1	1	0	0	2
A903978802	A903978	2010	1	1	1	A903	2	56	#NULL!	4	4	3	3	5585.73	5018.16	4137.76	#NULL!	4802.3	3719.45	#NULL!	4314.71	#NULL!	#NULL!	512	517	1	2	8	2	8	8	2	8	1	8	2	8	2	8	8	8	8	1	1	1	1	0	0	2
A903979701	A903979	2010	1	1	1	A903	1	83	#NULL!	1	1	4	7	5585.73	3249.23	10215	#NULL!	3839.06	3614.36	#NULL!	10799.3	#NULL!	#NULL!	512	517	1	2	8	2	8	8	2	8	1	8	2	8	2	8	8	8	8	1	1	1	1	0	0	2
A903979702	A903979	2010	1	1	1	A903	2	70	#NULL!	1	1	3	7	5585.73	3648.59	5933.21	#NULL!	3143.15	3141.07	#NULL!	6389.36	#NULL!	#NULL!	512	517	1	2	8	2	8	8	1	2	1	8	2	8	2	8	8	8	8	1	1	1	1	0	1	2
A904964301	A904964	2010	1	1	2	A904	2	34	#NULL!	4	4	4	1	6518.54	4707.52	#NULL!	8330.83	4250.2	4521.82	#NULL!	#NULL!	8284.92	#NULL!	501	501	1	2	8	8	8	8	1	2	1	8	2	8	2	8	8	8	8	1	1	1	1	0	1	2
A904964902	A904964	2010	1	1	2	A904	2	27	#NULL!	4	4	3	3	6518.54	14567.4	#NULL!	#NULL!	13635	8469.61	#NULL!	#NULL!	#NULL!	#NULL!	501	501	1	2	8	8	8	8	2	8	1	8	2	8	1	2	2	2	1	1	1	1	1	0	0	2
A904964903	A904964	2010	1	1	2	A904	1	2	29	4	4	1	#NULL!	6518.54	3500.1	#NULL!	#NULL!	3584.33	4507.88	#NULL!	#NULL!	#NULL!	#NULL!	501	501	1	8	8	8	8	8	8	8	8	8	8	8	8	8	8	8	8	8	8	8	8	#NULL!	#NULL!	8
A904965901	A904965	2010	1	1	2	A904	1	81	#NULL!	4	4	3	2	6518.54	2195.28	#NULL!	#NULL!	2593.79	2441.97	#NULL!	#NULL!	#NULL!	#NULL!	501	501	1	2	8	2	8	8	2	8	1	8	2	8	2	8	8	8	8	1	1	1	1	0	0	2
A904965902	A904965	2010	1	1	2	A904	2	77	#NULL!	4	4	2	7	6518.54	2728.91	#NULL!	#NULL!	2746.2	3015.88	#NULL!	#NULL!	#NULL!	#NULL!	501	501	1	2	8	1	2	2	2	8	1	8	2	8	1	1	1	1	2	1	1	1	1	0	0	2
A904966101	A904966	2010	1	1	2	A904	1	40	#NULL!	2	3	4	2	6518.54	5308.06	5624.6	15381.1	5587.57	7295.86	11462.6	7109.31	18441.2	15927.6	501	501	1	2	8	2	8	8	2	8	2	3	2	8	2	8	8	8	8	1	1	1	1	0	0	1
A904966102	A904966	2010	1	1	2	A904	2	33	#NULL!	2	3	3	7	6518.54	4707.52	#NULL!	#NULL!	4250.2	4521.82	#NULL!	#NULL!	#NULL!	#NULL!	501	501	1	2	8	8	8	8	2	8	1	8	1	2	1	1	1	1	2	1	1	1	2	1	0	2
A904966103	A904966	2010	1	1	2	A904	1	6	74	2	3	1	#NULL!	6518.54	2812.45	#NULL!	#NULL!	2910.72	2868.35	#NULL!	#NULL!	#NULL!	#NULL!	501	501	1	2	8	8	8	8	8	8	8	8	8	8	1	2	1	1	2	1	1	1	1	0	#NULL!	8
A904966104	A904966	2010	1	1	2	A904	1	1	16	2	3	1	#NULL!	6518.54	3500.1	#NULL!	#NULL!	3584.33	3005.25	#NULL!	#NULL!	#NULL!	#NULL!	501	501	1	8	8	8	8	8	8	8	8	8	8	8	8	8	8	8	8	8	8	8	8	#NULL!	#NULL!	8
A904967601	A904967	2010	1	1	2	A904	1	40	#NULL!	4	4	4	1	6518.54	5308.06	5624.6	15381.1	5587.57	7295.86	11462.6	7109.31	18441.2	15927.6	501	501	1	2	8	2	8	8	2	8	1	8	2	8	1	1	1	1	2	1	1	1	1	0	0	3
A904967602	A904967	2010	1	1	2	A904	2	39	#NULL!	4	4	4	7	6518.54	3840.62	#NULL!	#NULL!	3947.26	3899.75	#NULL!	#NULL!	#NULL!	#NULL!	501	501	1	1	1	8	8	8	2	8	1	8	2	8	1	1	2	2	1	1	1	1	1	0	0	2
A904967603	A904967	2010	1	1	2	A904	1	5	68	4	4	1	#NULL!	6518.54	2812.45	#NULL!	#NULL!	2910.72	2868.35	#NULL!	#NULL!	#NULL!	#NULL!	501	501	1	2	8	8	8	8	8	8	8	8	8	8	8	8	8	8	8	8	8	8	8	#NULL!	#NULL!	8
A904967604	A904967	2010	1	1	2	A904	1	8	#NULL!	4	4	1	#NULL!	6518.54	2812.45	#NULL!	#NULL!	2910.72	2868.35	#NULL!	#NULL!	#NULL!	#NULL!	501	501	1	1	2	8	8	8	8	8	8	8	8	8	1	1	1	1	2	1	1	1	1	0	#NULL!	8
A904969301	A904969	2010	1	1	2	A904	1	30	#NULL!	1	2	3	2	6518.54	6713.33	#NULL!	9291.21	10999.4	14359.9	#NULL!	#NULL!	14462.8	#NULL!	501	501	1	2	8	8	8	8	2	8	1	8	2	8	2	8	8	8	8	1	1	1	1	0	0	2
A904969302	A904969	2010	1	1	2	A904	2	24	#NULL!	1	2	4	1	6518.54	4521.93	#NULL!	4834.76	5763.48	9672.24	#NULL!	#NULL!	5845.91	#NULL!	501	501	1	2	8	8	8	8	2	8	1	8	2	8	1	1	1	1	2	1	1	1	1	0	0	2
A904971001	A904971	2010	1	1	2	A904	1	74	#NULL!	4	3	4	7	6518.54	1957.45	#NULL!	#NULL!	#NULL!	#NULL!	#NULL!	#NULL!	#NULL!	#NULL!	501	501	1	2	8	2	8	8	2	8	1	8	2	8	2	8	8	8	8	1	1	1	1	0	0	2
A904971002	A904971	2010	1	1	2	A904	2	71	#NULL!	4	3	4	7	6518.54	2465.1	8017.31	#NULL!	#NULL!	#NULL!	#NULL!	#NULL!	#NULL!	#NULL!	501	501	1	2	8	1	3	2	2	8	1	8	2	8	2	8	8	8	8	1	1	1	1	0	0	2
A904971003	A904971	2010	1	1	2	A904	1	37	#NULL!	3	3	4	3	6518.54	5516.87	#NULL!	#NULL!	#NULL!	#NULL!	#NULL!	#NULL!	#NULL!	#NULL!	501	501	1	2	8	8	8	8	2	8	1	8	2	8	1	2	1	1	2	1	1	1	1	0	0	2
A904971601	A904971	2010	1	1	2	A904	1	75	#NULL!	3	2	4	7	6518.54	2195.28	6901.57	#NULL!	2593.79	2441.97	#NULL!	7296.34	#NULL!	#NULL!	501	501	1	2	8	2	8	8	2	8	1	8	2	8	2	8	8	8	8	1	1	1	1	0	0	2
A904971602	A904971	2010	1	1	2	A904	2	72	#NULL!	3	2	3	7	6518.54	2465.1	4008.66	#NULL!	2123.6	2122.2	#NULL!	4316.85	#NULL!	#NULL!	501	501	1	1	2	1	3	2	2	8	1	8	2	8	1	1	2	2	1	1	1	1	2	1	0	2
A904974701	A904974	2010	1	1	2	A904	1	53	#NULL!	4	4	4	2	6518.54	9970.37	12913.3	22433.1	11470.7	10174.2	21418	16132.6	27951.8	28203.8	501	501	1	1	2	2	8	8	2	8	1	8	1	2	1	1	2	2	1	1	1	1	1	0	0	2
A904974702	A904974	2010	1	1	2	A904	2	52	#NULL!	4	4	4	1	6518.54	5035.54	#NULL!	#NULL!	5303.85	4879.78	#NULL!	#NULL!	#NULL!	#NULL!	501	501	1	2	8	1	3	2	2	8	1	8	2	8	2	8	8	8	8	1	1	1	1	0	0	2
A904977401	A904977	2010	1	1	2	A904	1	69	#NULL!	4	3	4	7	6518.54	3286.65	4381.76	#NULL!	3582.92	4160.8	#NULL!	4902.88	#NULL!	#NULL!	501	501	1	2	8	2	8	8	2	8	1	8	1	1	2	8	8	8	8	1	1	1	1	0	0	1
A904977402	A904977	2010	1	1	2	A904	2	65	#NULL!	4	3	4	7	6518.54	2807.69	4030.16	11059.4	2889.22	4121.69	17683.9	4175.77	10958	18086.1	501	501	1	2	8	2	8	8	2	8	1	8	2	8	2	8	8	8	8	1	1	1	1	0	0	2
A904977701	A904977	2010	1	1	2	A904	1	65	#NULL!	1	1	1	7	6518.54	2191.1	2921.17	8204.54	2388.61	2080.4	12810.8	3268.58	8950.5	14880.3	501	501	1	2	8	1	1	2	2	8	1	8	2	8	1	2	2	2	1	1	2	1	1	0	0	2
A904977702	A904977	2010	1	1	2	A904	2	66	#NULL!	1	1	1	7	6518.54	1871.79	2686.77	#NULL!	1926.15	2060.84	#NULL!	2783.85	#NULL!	#NULL!	501	501	1	2	8	1	2	2	2	8	2	3	2	8	2	8	8	8	8	1	1	1	1	0	0	1
A905968801	A905968	2010	1	1	1	A905	1	60	#NULL!	4	4	3	7	6574.34	5633.47	#NULL!	#NULL!	5338.47	5650.66	#NULL!	#NULL!	#NULL!	#NULL!	512	517	1	2	8	1	3	2	2	8	1	8	2	8	2	8	8	8	8	1	1	1	1	0	0	2
A905968802	A905968	2010	1	1	1	A905	2	56	#NULL!	4	4	2	3	6574.34	6994.32	7689.62	#NULL!	6693.46	5184.18	#NULL!	8018.47	#NULL!	#NULL!	512	517	1	2	8	2	8	8	1	2	1	8	2	8	2	8	8	8	8	1	1	1	1	0	1	2
A905969901	A905969	2010	1	1	1	A905	2	25	#NULL!	2	2	4	7	6574.34	10017.4	#NULL!	6447.17	#NULL!	#NULL!	#NULL!	#NULL!	#NULL!	#NULL!	512	517	1	1	2	8	8	8	2	8	1	8	2	8	2	8	8	8	8	1	1	1	1	0	0	2
A905969902	A905969	2010	1	1	1	A905	1	27	#NULL!	2	2	4	7	6574.34	11084.7	#NULL!	8444.45	#NULL!	#NULL!	#NULL!	#NULL!	#NULL!	#NULL!	512	517	1	2	8	8	8	8	2	8	1	8	2	8	2	8	8	8	8	1	1	1	1	0	0	2
A905970301	A905970	2010	1	1	1	A905	2	33	#NULL!	3	3	4	7	6574.34	6474.3	#NULL!	#NULL!	5845.35	6218.9	#NULL!	#NULL!	#NULL!	#NULL!	512	517	1	2	8	8	8	8	2	8	1	8	2	8	2	8	8	8	8	1	1	1	1	0	0	2
A905970302	A905970	2010	1	1	1	A905	1	35	#NULL!	3	3	4	1	6574.34	7587.41	#NULL!	#NULL!	9226.46	10219.4	#NULL!	#NULL!	#NULL!	#NULL!	512	517	1	2	8	8	8	8	2	8	1	8	2	8	2	8	8	8	8	1	1	1	1	0	0	2
A905970303	A905970	2010	1	1	1	A905	1	1	22	3	3	1	#NULL!	6574.34	4813.72	#NULL!	#NULL!	4929.56	4133.15	#NULL!	#NULL!	#NULL!	#NULL!	512	517	1	8	8	8	8	8	8	8	8	8	8	8	8	8	8	8	8	8	8	8	8	#NULL!	#NULL!	8
A905970501	A905970	2010	1	1	1	A905	1	62	#NULL!	3	3	3	3	6574.34	7511.3	4928.9	#NULL!	7117.96	7534.21	#NULL!	5367.18	#NULL!	#NULL!	512	517	1	2	8	2	8	8	2	8	1	8	2	8	2	8	8	8	8	1	1	1	1	0	0	2
A905970502	A905970	2010	1	1	1	A905	2	55	#NULL!	3	3	4	1	6574.34	9325.76	3844.81	23186	8924.61	6912.24	17538.6	4009.24	24532.5	18897.1	512	517	1	2	8	2	8	8	2	8	1	8	2	8	2	8	8	8	8	1	1	1	1	0	0	2
A905971001	A905971	2010	1	1	1	A905	1	66	#NULL!	3	2	1	3	6574.34	3013.44	8035.04	#NULL!	#NULL!	#NULL!	#NULL!	#NULL!	#NULL!	#NULL!	512	517	1	2	8	2	8	8	2	8	2	3	2	8	2	8	8	8	8	1	1	1	1	0	0	2
A905971002	A905971	2010	1	1	1	A905	2	58	#NULL!	2	2	1	7	6574.34	4662.88	#NULL!	#NULL!	#NULL!	#NULL!	#NULL!	#NULL!	#NULL!	#NULL!	512	517	1	2	8	2	8	8	2	8	1	8	2	8	2	8	8	8	8	1	1	1	1	0	0	2
A905971003	A905971	2010	1	1	1	A905	2	30	#NULL!	1	2	4	2	6574.34	6474.3	#NULL!	#NULL!	#NULL!	#NULL!	#NULL!	#NULL!	#NULL!	#NULL!	512	517	1	2	8	8	8	8	2	8	1	8	2	8	2	8	8	8	8	1	1	1	1	0	0	2
A905971201	A905971	2010	1	1	1	A905	1	42	#NULL!	3	4	4	3	6574.34	7300.23	7735.57	21153.8	7684.64	10034.1	15764.6	9777.51	19021.8	21905.5	512	517	1	2	8	2	8	8	2	8	1	8	2	8	2	8	8	8	8	1	1	1	1	0	0	2
A905971202	A905971	2010	1	1	1	A905	2	36	#NULL!	3	4	3	7	6574.34	5282.04	#NULL!	#NULL!	5428.71	5363.36	#NULL!	#NULL!	#NULL!	#NULL!	512	517	1	2	8	8	8	8	2	8	1	8	2	8	2	8	8	8	8	1	1	1	1	0	0	2
A905971203	A905971	2010	1	1	1	A905	1	10	#NULL!	3	4	1	#NULL!	6574.34	5763.03	#NULL!	10684.9	5206.19	4885.08	#NULL!	#NULL!	8587.85	#NULL!	512	517	1	1	2	8	8	8	8	8	8	8	8	8	1	1	1	1	2	2	2	1	1	0	#NULL!	8
A905971204	A905971	2010	1	1	1	A905	2	8	#NULL!	3	4	1	#NULL!	6574.34	3494.62	#NULL!	#NULL!	3545.09	3987.73	#NULL!	#NULL!	#NULL!	#NULL!	512	517	1	2	8	8	8	8	8	8	8	8	8	8	2	8	8	8	8	2	1	1	1	0	#NULL!	8
A905971301	A905971	2010	1	1	1	A905	1	36	#NULL!	2	3	3	1	6574.34	7587.41	#NULL!	#NULL!	9226.46	10219.4	#NULL!	#NULL!	#NULL!	#NULL!	512	517	1	2	8	8	8	8	2	8	1	8	2	8	2	8	8	8	8	1	1	1	1	0	0	2
A905971302	A905971	2010	1	1	1	A905	2	32	#NULL!	2	3	4	7	6574.34	6474.3	#NULL!	22914.9	5845.35	6218.9	#NULL!	#NULL!	22788.7	#NULL!	512	517	1	2	8	8	8	8	2	8	1	8	2	8	2	8	8	8	8	1	1	1	1	0	0	2
A905971303	A905971	2010	1	1	1	A905	2	7	#NULL!	2	3	1	#NULL!	6574.34	3494.62	#NULL!	#NULL!	3545.09	3987.73	#NULL!	#NULL!	#NULL!	#NULL!	512	517	1	2	8	8	8	8	8	8	8	8	8	8	2	8	8	8	8	1	1	1	1	0	#NULL!	8
A905971304	A905971	2010	1	1	1	A905	2	5	69	2	3	1	#NULL!	6574.34	3494.62	#NULL!	#NULL!	3545.09	3987.73	#NULL!	#NULL!	#NULL!	#NULL!	512	517	1	2	8	8	8	8	8	8	8	8	8	8	8	8	8	8	8	8	8	8	8	#NULL!	#NULL!	8
A905972401	A905972	2010	1	1	1	A905	2	58	#NULL!	4	4	1	6	6574.34	9325.76	3844.81	11593	8924.61	6912.24	8769.28	4009.24	12266.3	9448.56	512	517	1	2	8	2	8	8	1	2	1	8	2	8	2	8	8	8	8	1	1	1	1	0	1	2
A905972501	A905972	2010	1	1	1	A905	1	27	#NULL!	1	1	4	2	6574.34	11084.7	#NULL!	8444.45	12970.3	14169.5	#NULL!	#NULL!	10399.3	#NULL!	512	517	1	2	8	8	8	8	2	8	1	8	2	8	2	8	8	8	8	1	1	1	1	0	0	1
A905972801	A905972	2010	1	1	1	A905	1	52	#NULL!	1	2	1	6	6574.34	9141.57	#NULL!	#NULL!	10517.2	9328.42	#NULL!	#NULL!	#NULL!	#NULL!	512	517	1	2	8	2	8	8	2	8	2	3	2	8	2	8	8	8	8	1	1	1	1	0	0	2
A905972802	A905972	2010	1	1	1	A905	2	49	#NULL!	1	2	1	3	6574.34	7003.43	14385.2	18176	7457.15	5599.32	28587.5	15308	16807.9	31776.3	512	517	1	2	8	2	8	8	2	8	1	8	1	1	2	8	8	8	8	1	1	1	1	0	0	2
A905972803	A905972	2010	1	1	1	A905	1	24	#NULL!	2	2	3	7	6574.34	9872.44	#NULL!	#NULL!	19634.5	22506.9	#NULL!	#NULL!	#NULL!	#NULL!	512	517	1	2	8	8	8	8	2	8	1	8	2	8	2	8	8	8	8	1	1	1	1	0	0	2
A905972804	A905972	2010	1	1	1	A905	2	20	#NULL!	1	2	3	6	6574.34	6219.05	#NULL!	13298.6	7926.58	8868.22	#NULL!	#NULL!	16079.9	#NULL!	512	517	1	2	8	8	8	8	2	8	1	8	2	8	1	2	2	1	2	2	1	1	1	0	0	1
A905973901	A905973	2010	1	1	1	A905	1	33	#NULL!	2	2	4	7	6574.34	9232.91	#NULL!	12778.3	15127.6	13166.2	#NULL!	#NULL!	19890.8	#NULL!	512	517	1	2	8	8	8	8	2	8	1	8	2	8	2	8	8	8	8	1	1	1	1	0	0	2
A905977501	A905977	2010	1	1	1	A905	1	71	#NULL!	2	1	3	7	6574.34	2692.1	4331.97	56292	2917.29	2706.72	99805.2	4309.17	56424.8	103759	512	517	1	2	8	2	8	8	2	8	2	3	2	8	2	8	8	8	8	1	1	1	1	0	0	2
A905977502	A905977	2010	1	1	1	A905	2	68	#NULL!	2	1	2	7	6574.34	2574.3	3695.14	#NULL!	2649.05	2834.3	#NULL!	3828.65	#NULL!	#NULL!	512	517	1	2	8	2	8	8	2	8	1	8	2	8	1	1	1	1	2	1	1	1	1	0	0	2
A905977702	A905977	2010	1	1	1	A905	2	52	#NULL!	1	1	3	7	6574.34	9233.9	9926.14	19062.8	4862.96	8948.29	27947.1	10387.9	21428.5	31643.8	512	517	1	2	8	2	8	8	2	8	1	8	2	8	2	8	8	8	8	1	1	1	1	0	0	2
A905979001	A905979	2010	1	1	1	A905	1	56	#NULL!	4	4	2	3	6574.34	5207.73	6669.21	11035.4	7802.78	7365.15	17127.6	7481.13	23617.3	19682.6	512	517	1	2	8	2	8	8	2	8	1	8	2	8	2	8	8	8	8	1	1	1	1	0	0	2
A905979002	A905979	2010	1	1	1	A905	2	54	#NULL!	4	4	2	3	6574.34	4616.95	4963.07	#NULL!	6483.95	5965.52	#NULL!	5193.93	#NULL!	#NULL!	512	517	1	2	8	2	8	8	2	8	1	8	2	8	2	8	8	8	8	1	1	1	1	0	0	2
A905979003	A905979	2010	1	1	1	A905	2	25	#NULL!	4	4	4	7	6574.34	10017.4	#NULL!	#NULL!	12501.6	10354.1	#NULL!	#NULL!	#NULL!	#NULL!	512	517	1	2	8	8	8	8	2	8	1	8	2	8	2	8	8	8	8	1	1	1	1	0	0	2
A905979004	A905979	2010	1	1	1	A905	1	24	#NULL!	4	4	3	3	6574.34	9872.44	#NULL!	18779	#NULL!	#NULL!	#NULL!	#NULL!	#NULL!	#NULL!	512	517	1	2	8	8	8	8	2	8	1	8	2	8	2	8	8	8	8	1	2	1	1	0	0	1
A905979702	A905979	2010	1	1	1	A905	2	86	#NULL!	4	4	1	7	6574.34	7506.19	#NULL!	#NULL!	7553.77	8295.53	#NULL!	#NULL!	#NULL!	#NULL!	512	517	1	2	8	2	8	8	2	8	1	8	2	8	2	8	8	8	8	1	1	1	1	0	0	2
A906962901	A906962	2010	1	1	1	A906	1	30	#NULL!	3	3	4	#NULL!	9582.03	15768.7	#NULL!	47181.4	18156.7	19356	#NULL!	#NULL!	68003.4	#NULL!	512	517	1	2	8	8	8	8	2	8	1	8	1	1	2	8	8	8	8	1	1	1	1	0	0	2
A906962902	A906962	2010	1	1	1	A906	2	30	#NULL!	2	3	4	7	9582.03	11952.6	#NULL!	#NULL!	10791.4	11481.1	#NULL!	#NULL!	#NULL!	#NULL!	512	517	1	2	8	8	8	8	2	8	1	8	2	8	2	8	8	8	8	1	1	1	1	0	0	2
A906962903	A906962	2010	1	1	1	A906	2	1	20	3	3	1	#NULL!	9582.03	8169.52	#NULL!	#NULL!	8401.63	6756.26	#NULL!	#NULL!	#NULL!	#NULL!	512	517	1	8	8	8	8	8	8	8	8	8	8	8	8	8	8	8	8	8	8	8	8	#NULL!	#NULL!	8
A906963002	A906963	2010	1	1	1	A906	2	46	#NULL!	1	2	4	6	9582.03	15739.8	22651.1	25166.8	17236	17228.7	52776.9	25785.5	38787.4	58664	512	517	1	2	8	1	2	2	2	8	1	8	1	1	2	8	8	8	8	1	1	1	1	0	0	2
A906963003	A906963	2010	1	1	1	A906	1	19	#NULL!	2	2	3	3	9582.03	15995	#NULL!	38409.2	16614	19141.2	#NULL!	#NULL!	47223.9	#NULL!	512	517	1	1	2	8	8	8	2	8	1	8	1	1	1	1	1	1	2	1	2	1	1	0	0	1
A906963004	A906963	2010	1	1	1	A906	1	17	#NULL!	2	2	2	6	9582.03	12208.5	#NULL!	#NULL!	#NULL!	#NULL!	#NULL!	#NULL!	#NULL!	#NULL!	512	517	1	9	9	8	8	8	8	8	3	3	1	3	2	8	8	8	8	1	1	1	1	0	#NULL!	1
A906963005	A906963	2010	1	1	1	A906	1	14	#NULL!	1	2	1	#NULL!	9582.03	10639.4	#NULL!	#NULL!	16019.1	15031	#NULL!	#NULL!	#NULL!	#NULL!	512	517	1	9	9	8	8	8	8	8	1	8	2	8	1	1	2	2	1	2	1	1	1	0	#NULL!	2
A906963301	A906963	2010	1	1	1	A906	1	71	#NULL!	2	1	3	7	9582.03	9940.05	15995	#NULL!	10771.5	9994.05	#NULL!	15910.8	#NULL!	#NULL!	512	517	1	2	8	2	8	8	2	8	2	3	1	1	2	8	8	8	8	1	1	1	1	0	0	2
A906963501	A906963	2010	1	1	1	A906	1	77	#NULL!	1	1	3	7	9582.03	5573.88	#NULL!	#NULL!	6585.71	6200.25	#NULL!	#NULL!	#NULL!	#NULL!	512	517	1	2	8	1	2	2	2	8	2	3	1	1	2	8	8	8	8	1	1	1	1	0	0	2
A906963502	A906963	2010	1	1	1	A906	2	76	#NULL!	1	1	1	7	9582.03	6928.79	#NULL!	#NULL!	6972.71	7657.41	#NULL!	#NULL!	#NULL!	#NULL!	512	517	1	9	9	1	2	2	2	8	1	8	2	8	2	8	8	8	8	1	1	1	1	0	0	2
A906965803	A906965	2010	1	1	1	A906	2	26	#NULL!	4	4	3	7	9582.03	16883.4	#NULL!	#NULL!	#NULL!	#NULL!	#NULL!	#NULL!	#NULL!	#NULL!	512	517	1	2	8	8	8	8	2	8	1	8	2	8	2	8	8	8	8	1	1	1	1	0	0	1
A906965804	A906965	2010	1	1	1	A906	2	23	#NULL!	3	4	3	7	9582.03	11481.3	#NULL!	24551.2	#NULL!	#NULL!	#NULL!	#NULL!	#NULL!	#NULL!	512	517	1	2	8	8	8	8	2	8	1	8	1	1	2	8	8	8	8	1	1	1	1	0	0	2
A906966301	A906966	2010	1	1	1	A906	2	27	#NULL!	3	3	4	7	9582.03	16883.4	#NULL!	#NULL!	17359.7	18610.8	#NULL!	#NULL!	#NULL!	#NULL!	512	517	1	1	2	8	8	8	2	8	1	8	2	8	2	8	8	8	8	1	1	1	1	0	0	2
A906966901	A906966	2010	1	1	1	A906	1	66	#NULL!	1	1	3	5	9582.03	5563.28	7416.96	#NULL!	9097.15	7042.95	#NULL!	8299.05	#NULL!	#NULL!	512	517	1	2	8	2	8	8	2	8	2	3	1	1	2	8	8	8	8	1	1	1	1	0	0	2
A906966902	A906966	2010	1	1	1	A906	2	63	#NULL!	1	1	1	7	9582.03	6494.28	6984.91	#NULL!	9738.98	7844.05	#NULL!	7310.87	#NULL!	#NULL!	512	517	1	2	8	2	8	8	2	8	1	8	2	8	2	8	8	8	8	1	1	1	1	0	0	2
A906966903	A906966	2010	1	1	1	A906	2	34	#NULL!	1	1	3	6	9582.03	11952.6	#NULL!	56098.9	#NULL!	#NULL!	#NULL!	#NULL!	#NULL!	#NULL!	512	517	1	2	8	8	8	8	2	8	1	8	2	8	2	8	8	8	8	1	1	1	1	0	0	2
A906966904	A906966	2010	1	1	1	A906	2	8	#NULL!	1	1	1	#NULL!	9582.03	6451.61	#NULL!	#NULL!	6544.79	9815.95	#NULL!	#NULL!	#NULL!	#NULL!	512	517	1	1	1	8	8	8	8	8	8	8	8	8	1	1	1	1	1	2	2	1	1	0	#NULL!	8
A906967201	A906967	2010	1	1	1	A906	1	62	#NULL!	2	2	2	3	9582.03	6933.5	#NULL!	#NULL!	6570.43	6954.66	#NULL!	#NULL!	#NULL!	#NULL!	512	517	1	1	2	1	2	2	1	2	3	1	1	2	2	8	8	8	8	2	2	1	2	1	1	2
A906967202	A906967	2010	1	1	1	A906	2	57	#NULL!	2	2	1	6	9582.03	8608.4	14196.2	21402.5	8238.1	6380.53	32378.9	14803.3	22645.4	34887	512	517	1	2	8	2	8	8	1	1	1	8	2	8	2	8	8	8	8	1	1	1	1	0	1	2
A906967401	A906967	2010	1	1	1	A906	1	43	#NULL!	2	3	3	7	9582.03	13477.3	#NULL!	#NULL!	14187	18524.4	#NULL!	#NULL!	#NULL!	#NULL!	512	517	1	2	8	2	8	8	2	8	1	8	2	8	2	8	8	8	8	1	1	1	1	0	0	2
A906967402	A906967	2010	1	1	1	A906	2	38	#NULL!	2	3	4	1	9582.03	9751.46	#NULL!	33669.5	10022.2	9901.59	#NULL!	#NULL!	23054.7	#NULL!	512	517	1	2	8	8	8	8	2	8	1	8	2	8	2	8	8	8	8	1	1	1	1	0	0	2
A906967403	A906967	2010	1	1	1	A906	2	13	#NULL!	3	3	1	#NULL!	9582.03	9455.68	#NULL!	16661.7	9300.18	9170.91	#NULL!	#NULL!	14120.9	#NULL!	512	517	1	2	8	8	8	8	8	8	1	8	2	8	2	8	8	8	8	1	1	1	1	0	#NULL!	1
A906967404	A906967	2010	1	1	1	A906	2	9	#NULL!	2	3	1	#NULL!	9582.03	6451.61	#NULL!	#NULL!	6544.79	7361.96	#NULL!	#NULL!	#NULL!	#NULL!	512	517	1	1	2	8	8	8	8	8	8	8	8	8	1	1	1	1	2	1	1	1	1	0	#NULL!	8
A906967405	A906967	2010	1	1	1	A906	2	6	78	2	3	1	#NULL!	9582.03	6451.61	#NULL!	#NULL!	6544.79	7361.96	#NULL!	#NULL!	#NULL!	#NULL!	512	517	1	1	9	8	8	8	8	8	8	8	8	8	1	1	1	1	2	2	2	1	1	0	#NULL!	8
A906967701	A906967	2010	1	1	1	A906	2	52	#NULL!	3	3	1	3	9582.03	8523.6	9162.59	#NULL!	8977.77	8259.96	#NULL!	9588.79	#NULL!	#NULL!	512	517	1	2	8	2	8	8	2	8	1	8	2	8	2	8	8	8	8	1	1	1	1	0	0	2
A906967702	A906967	2010	1	1	1	A906	1	29	#NULL!	3	3	4	7	9582.03	15988.7	#NULL!	31179.5	16628.8	21975.3	#NULL!	#NULL!	38397.5	#NULL!	512	517	1	2	8	8	8	8	2	8	1	8	2	8	2	8	8	8	8	2	2	1	2	1	0	2
A906967901	A906967	2010	1	1	1	A906	1	67	#NULL!	4	3	2	6	9582.03	15690.4	14833.9	#NULL!	9097.15	15846.6	#NULL!	16598.1	#NULL!	#NULL!	512	517	1	2	8	1	2	2	2	8	1	8	2	8	2	8	8	8	8	1	1	1	1	0	0	2
A906968001	A906968	2010	1	1	1	A906	1	61	#NULL!	1	2	3	7	9582.03	6933.5	#NULL!	20308	6570.43	6954.66	#NULL!	#NULL!	22513	#NULL!	512	517	1	2	8	2	8	8	2	8	1	8	2	8	2	8	8	8	8	1	1	1	1	0	0	2
A906968002	A906968	2010	1	1	1	A906	1	31	#NULL!	1	2	3	2	9582.03	15768.7	#NULL!	#NULL!	18156.7	19356	#NULL!	#NULL!	#NULL!	#NULL!	512	517	1	2	8	8	8	8	2	8	1	8	2	8	1	1	2	2	1	2	2	1	2	1	0	1
A906968801	A906968	2010	1	1	1	A906	1	78	#NULL!	1	1	1	7	9582.03	5573.88	#NULL!	#NULL!	8780.95	8267	#NULL!	#NULL!	#NULL!	#NULL!	512	517	1	2	8	1	2	2	2	8	2	3	2	8	2	8	8	8	8	1	1	1	1	0	0	2
A906968802	A906968	2010	1	1	1	A906	2	69	#NULL!	1	1	1	7	9582.03	4752.55	13643.6	#NULL!	6520.74	6976.74	#NULL!	14136.6	#NULL!	#NULL!	512	517	1	2	8	1	1	2	2	8	1	8	1	2	2	8	8	8	8	1	1	1	1	0	0	2
A906968803	A906968	2010	1	1	1	A906	1	34	#NULL!	1	1	4	1	9582.03	15768.7	#NULL!	#NULL!	18156.7	19356	#NULL!	#NULL!	#NULL!	#NULL!	512	517	1	2	8	8	8	8	2	8	1	8	2	8	1	2	2	2	1	2	1	1	1	0	0	2
A906969302	A906969	2010	1	1	1	A906	2	69	#NULL!	3	2	1	7	9582.03	9505.1	6821.81	#NULL!	9781.11	10465.1	#NULL!	7068.28	#NULL!	#NULL!	512	517	1	2	8	1	2	1	2	8	3	3	1	1	2	8	8	8	8	1	1	1	1	0	0	2
A906972401	A906972	2010	1	1	1	A906	1	69	#NULL!	2	2	2	7	9582.03	5563.28	7416.96	#NULL!	6064.77	5282.21	#NULL!	8299.05	#NULL!	#NULL!	512	517	1	2	8	2	8	8	2	8	3	3	1	1	2	8	8	8	8	1	1	1	1	0	0	2
A906972402	A906972	2010	1	1	1	A906	2	64	#NULL!	2	2	1	7	9582.03	6494.28	6984.91	30665.6	6492.65	5883.04	53912.3	7310.87	29603.6	54404.1	512	517	1	2	8	2	8	8	1	2	1	8	1	1	2	8	8	8	8	2	2	1	1	0	1	2
A906972501	A906972	2010	1	1	1	A906	1	70	#NULL!	2	1	1	7	9582.03	4970.02	#NULL!	#NULL!	5385.77	4997.03	#NULL!	#NULL!	#NULL!	#NULL!	512	517	1	2	8	1	1	2	2	8	3	1	1	3	2	8	8	8	8	1	1	1	1	0	0	2
A906972502	A906972	2010	1	1	1	A906	2	65	#NULL!	2	1	1	7	9582.03	4752.55	#NULL!	#NULL!	4890.56	5232.55	#NULL!	#NULL!	#NULL!	#NULL!	512	517	1	2	8	1	2	2	2	8	1	8	2	8	2	8	8	8	8	1	1	1	1	0	0	2
A906973701	A906973	2010	1	1	1	A906	1	58	#NULL!	4	4	3	3	9582.03	12819	#NULL!	40746	14405.1	13597.2	#NULL!	#NULL!	43601.2	#NULL!	512	517	1	2	8	1	2	2	2	8	1	8	1	2	2	8	8	8	8	1	1	1	1	0	0	2
A906973702	A906973	2010	1	1	1	A906	2	55	#NULL!	4	4	3	7	9582.03	11477.9	14196.2	#NULL!	10984.1	8507.37	#NULL!	14803.3	#NULL!	#NULL!	512	517	1	2	8	1	2	2	2	8	1	8	1	1	2	8	8	8	8	1	1	1	1	0	0	2
A906973704	A906973	2010	1	1	1	A906	2	26	#NULL!	4	4	4	7	9582.03	16883.4	#NULL!	#NULL!	17359.7	18610.8	#NULL!	#NULL!	#NULL!	#NULL!	512	517	1	1	9	8	8	8	2	8	1	8	2	8	1	2	2	2	1	1	1	1	1	0	0	2
A906974701	A906974	2010	1	1	1	A906	2	24	#NULL!	1	2	4	2	9582.03	11481.3	#NULL!	#NULL!	14633.7	16372.1	#NULL!	#NULL!	#NULL!	#NULL!	512	517	1	1	2	8	8	8	2	8	1	8	2	8	1	1	1	1	2	1	1	1	1	0	0	2
A906978601	A906978	2010	1	1	1	A906	2	23	#NULL!	1	1	3	7	9582.03	11481.3	#NULL!	#NULL!	14633.7	16372.1	#NULL!	#NULL!	#NULL!	#NULL!	512	517	1	2	8	8	8	8	2	8	1	8	1	1	2	8	8	8	8	1	1	1	1	0	0	1
A907970801	A907970	2010	1	1	1	A907	1	27	#NULL!	4	4	3	1	5583.97	11297.8	#NULL!	25820.5	#NULL!	#NULL!	#NULL!	#NULL!	#NULL!	#NULL!	512	517	1	2	8	8	8	8	2	8	1	8	2	8	1	2	1	1	2	1	1	1	1	0	0	1
A907970802	A907970	2010	1	1	1	A907	2	26	#NULL!	3	4	3	7	5583.97	10210	#NULL!	#NULL!	#NULL!	#NULL!	#NULL!	#NULL!	#NULL!	#NULL!	512	517	1	2	8	8	8	8	2	8	1	8	2	8	1	2	1	1	2	1	1	1	1	0	0	1
A907970803	A907970	2010	1	1	1	A907	2	26	#NULL!	3	4	3	2	5583.97	10210	#NULL!	#NULL!	#NULL!	#NULL!	#NULL!	#NULL!	#NULL!	#NULL!	512	517	1	2	8	8	8	8	2	8	2	3	1	1	1	1	1	1	2	1	2	1	1	0	0	1
A907971301	A907971	2010	1	1	1	A907	2	74	#NULL!	3	2	1	7	5583.97	4607.3	#NULL!	#NULL!	5953.56	4958.02	#NULL!	#NULL!	#NULL!	#NULL!	512	517	1	2	8	2	8	8	2	8	1	8	2	8	1	2	2	2	1	2	1	1	1	0	0	2
A907971304	A907971	2010	1	1	1	A907	1	34	#NULL!	1	2	3	6	5583.97	12547.3	#NULL!	26048.1	#NULL!	#NULL!	#NULL!	#NULL!	#NULL!	#NULL!	512	517	1	2	8	8	8	8	2	8	1	8	2	8	1	2	1	1	2	2	2	1	1	0	0	2
A907971305	A907971	2010	1	1	1	A907	2	29	#NULL!	1	2	3	7	5583.97	13613.3	#NULL!	13142.3	17359.7	13191.5	#NULL!	#NULL!	29398.9	#NULL!	512	517	1	2	8	8	8	8	2	8	1	8	1	1	2	8	8	8	8	1	1	1	1	0	0	2
A907971306	A907971	2010	1	1	1	A907	2	2	24	1	2	1	#NULL!	5583.97	4510.26	#NULL!	#NULL!	4638.4	6216.7	#NULL!	#NULL!	#NULL!	#NULL!	512	517	1	8	8	8	8	8	8	8	8	8	8	8	8	8	8	8	8	8	8	8	8	#NULL!	#NULL!	8
A907971401	A907971	2010	1	1	1	A907	1	75	#NULL!	3	2	2	7	5583.97	3077.25	#NULL!	#NULL!	4363.03	4792.28	#NULL!	#NULL!	#NULL!	#NULL!	512	517	1	2	8	2	8	8	2	8	2	3	3	8	2	8	8	8	8	2	1	1	1	0	0	2
A907971402	A907971	2010	1	1	1	A907	2	73	#NULL!	3	2	1	7	5583.97	3455.47	#NULL!	#NULL!	3572.14	4164.74	#NULL!	#NULL!	#NULL!	#NULL!	512	517	1	2	8	2	8	8	1	2	1	8	2	8	1	1	1	1	1	1	1	1	1	0	1	2
A907971403	A907971	2010	1	1	1	A907	1	37	#NULL!	1	2	3	5	5583.97	7733.32	#NULL!	#NULL!	#NULL!	#NULL!	#NULL!	#NULL!	#NULL!	#NULL!	512	517	1	2	8	8	8	8	2	8	1	8	2	8	1	1	1	1	2	1	1	1	1	0	0	2
A907971405	A907971	2010	1	1	1	A907	1	8	#NULL!	1	2	1	#NULL!	5583.97	3942.37	#NULL!	#NULL!	4080.12	5629.02	#NULL!	#NULL!	#NULL!	#NULL!	512	517	1	2	8	8	8	8	8	8	8	8	8	8	2	8	8	8	8	1	1	1	1	0	#NULL!	8
A907971406	A907971	2010	1	1	1	A907	1	44	#NULL!	1	2	3	3	5583.97	7440.62	23086.4	#NULL!	9398.91	14317.9	#NULL!	26911.9	#NULL!	#NULL!	512	517	1	2	8	2	8	8	2	8	1	8	2	8	2	8	8	8	8	1	1	1	1	0	0	2
A907971407	A907971	2010	1	1	1	A907	2	40	#NULL!	1	2	4	7	5583.97	6914.36	#NULL!	#NULL!	8273.48	9017.41	#NULL!	#NULL!	#NULL!	#NULL!	512	517	1	2	8	2	8	8	2	8	1	8	2	8	2	8	8	8	8	1	1	1	1	0	0	2
A907971601	A907971	2010	1	1	1	A907	1	71	#NULL!	1	1	3	7	5583.97	4115.8	#NULL!	#NULL!	4460.09	4138.16	#NULL!	#NULL!	#NULL!	#NULL!	512	517	1	2	8	2	8	8	2	8	2	3	2	8	2	8	8	8	8	1	1	1	1	0	0	2
A907971602	A907971	2010	1	1	1	A907	2	69	#NULL!	1	1	1	7	5583.97	3935.7	7532.41	#NULL!	4049.99	4333.21	#NULL!	7804.56	#NULL!	#NULL!	512	517	1	2	8	1	3	2	2	8	1	8	2	8	2	8	8	8	8	1	1	1	1	0	0	2
A907972101	A907972	2010	1	1	1	A907	2	45	#NULL!	1	2	3	3	5583.97	7138.11	7330.9	#NULL!	#NULL!	#NULL!	#NULL!	#NULL!	#NULL!	#NULL!	512	517	1	2	8	1	1	2	1	1	1	8	2	8	2	8	8	8	8	1	1	1	1	0	1	1
A907972102	A907972	2010	1	1	1	A907	2	21	#NULL!	1	2	3	7	5583.97	6338.65	#NULL!	13554.3	#NULL!	#NULL!	#NULL!	#NULL!	#NULL!	#NULL!	512	517	1	2	8	8	8	8	2	8	1	8	1	1	2	8	8	8	8	1	1	1	1	0	0	1
A907972201	A907972	2010	1	1	1	A907	1	73	#NULL!	1	1	3	7	5583.97	2743.87	#NULL!	#NULL!	2973.39	2758.77	#NULL!	#NULL!	#NULL!	#NULL!	512	517	1	2	8	2	8	8	2	8	2	3	1	1	2	8	8	8	8	1	1	1	1	0	0	2
A907972202	A907972	2010	1	1	1	A907	2	67	#NULL!	1	1	1	6	5583.97	2623.8	7532.41	#NULL!	2699.99	2888.81	#NULL!	7804.56	#NULL!	#NULL!	512	517	1	2	8	2	8	8	2	8	1	8	2	8	2	8	8	8	8	1	1	1	1	0	0	2
A907973101	A907973	2010	1	1	1	A907	1	43	#NULL!	1	2	2	5	5583.97	7440.62	15768.7	#NULL!	7832.42	10227	#NULL!	19931.1	#NULL!	#NULL!	512	517	1	1	2	2	8	8	2	8	1	8	2	8	1	2	2	1	1	1	1	1	1	0	0	2
A907973102	A907973	2010	1	1	1	A907	2	40	#NULL!	1	2	3	7	5583.97	6914.36	#NULL!	#NULL!	6894.57	6441.01	#NULL!	#NULL!	#NULL!	#NULL!	512	517	1	2	8	2	8	8	2	8	1	8	2	8	2	8	8	8	8	1	1	1	1	0	0	2
A907973103	A907973	2010	1	1	1	A907	2	14	#NULL!	1	2	1	#NULL!	5583.97	5220.32	#NULL!	9198.63	5134.47	5063.1	#NULL!	#NULL!	15591.9	#NULL!	512	517	1	2	8	8	8	8	8	8	1	8	2	8	2	8	8	8	8	1	1	1	1	0	#NULL!	2
A907973104	A907973	2010	1	1	1	A907	1	9	#NULL!	1	2	1	#NULL!	5583.97	3942.37	#NULL!	#NULL!	4080.12	4020.73	#NULL!	#NULL!	#NULL!	#NULL!	512	517	1	2	8	8	8	8	8	8	8	8	8	8	2	8	8	8	8	1	2	1	1	0	#NULL!	8
A907973105	A907973	2010	1	1	1	A907	2	6	80	1	2	1	#NULL!	5583.97	3561.83	#NULL!	#NULL!	3613.27	4064.42	#NULL!	#NULL!	#NULL!	#NULL!	512	517	1	2	8	8	8	8	8	8	8	8	8	8	2	8	8	8	8	1	1	1	1	0	#NULL!	8
A907973301	A907973	2010	1	1	1	A907	2	42	#NULL!	1	2	3	5	5583.97	6914.36	17600.6	#NULL!	9192.76	8588.01	#NULL!	16369.5	#NULL!	#NULL!	512	517	1	2	8	2	8	8	2	8	1	8	2	8	1	2	1	1	2	1	1	1	1	0	0	1
A907973302	A907973	2010	1	1	1	A907	2	13	#NULL!	2	2	1	#NULL!	5583.97	10440.6	#NULL!	#NULL!	6845.97	6750.81	#NULL!	#NULL!	#NULL!	#NULL!	512	517	1	2	8	8	8	8	8	8	1	8	2	8	2	8	8	8	8	1	1	1	1	0	#NULL!	2
A907973304	A907973	2010	1	1	1	A907	2	67	#NULL!	3	2	1	7	5583.97	2623.8	#NULL!	#NULL!	3599.99	3851.74	#NULL!	#NULL!	#NULL!	#NULL!	512	517	1	2	8	2	8	8	2	8	1	8	2	8	2	8	8	8	8	1	1	1	1	0	0	2
A907973401	A907973	2010	1	1	1	A907	1	63	#NULL!	1	1	1	6	5583.97	3827.87	5023.68	#NULL!	3627.42	3839.55	#NULL!	5470.39	#NULL!	#NULL!	512	517	1	2	8	1	2	2	2	8	1	8	1	1	2	8	8	8	8	1	2	1	2	1	0	2
A907973402	A907973	2010	1	1	1	A907	2	60	#NULL!	2	1	3	6	5583.97	3585.38	3856.25	#NULL!	3584.49	3247.93	#NULL!	4036.21	#NULL!	#NULL!	512	517	1	1	2	1	3	2	2	8	1	8	1	1	2	8	8	8	8	1	1	1	1	0	0	2
A907973601	A907973	2010	1	1	1	A907	1	45	#NULL!	1	1	3	7	5583.97	11884.9	#NULL!	#NULL!	14272.5	11858.4	#NULL!	#NULL!	#NULL!	#NULL!	512	517	1	2	8	2	8	8	2	8	1	8	2	8	1	2	1	1	2	1	1	1	1	0	0	1
A907973602	A907973	2010	1	1	1	A907	2	45	#NULL!	1	1	3	3	5583.97	7138.11	#NULL!	18525.5	7600.56	5706.99	#NULL!	#NULL!	17131.1	#NULL!	512	517	1	2	8	2	8	8	1	1	1	8	2	8	1	1	1	1	2	1	1	1	1	0	1	1
A907973603	A907973	2010	1	1	1	A907	1	23	#NULL!	1	1	3	1	5583.97	10062.3	#NULL!	#NULL!	19634.5	22939.7	#NULL!	#NULL!	#NULL!	#NULL!	512	517	1	2	8	8	8	8	2	8	1	8	2	8	2	8	8	8	8	1	1	1	1	0	0	1
A907973604	A907973	2010	1	1	1	A907	1	21	#NULL!	1	1	3	7	5583.97	10062.3	#NULL!	19140.1	19634.5	22939.7	#NULL!	#NULL!	27848	#NULL!	512	517	1	2	8	8	8	8	2	8	1	8	2	8	2	8	8	8	8	1	1	1	1	0	0	1
A907973702	A907973	2010	1	1	1	A907	2	32	#NULL!	1	2	3	3	5583.97	6598.81	#NULL!	11677.8	5957.76	6338.5	#NULL!	#NULL!	11613.4	#NULL!	512	517	1	2	8	8	8	8	2	8	1	8	2	8	2	8	8	8	8	1	1	1	1	0	0	2
A907973703	A907973	2010	1	1	1	A907	2	7	#NULL!	1	2	1	#NULL!	5583.97	3561.83	#NULL!	#NULL!	3613.27	4064.42	#NULL!	#NULL!	#NULL!	#NULL!	512	517	1	2	8	8	8	8	8	8	8	8	8	8	2	8	8	8	8	1	1	1	1	0	#NULL!	8
A907973704	A907973	2010	1	1	1	A907	2	6	73	1	2	1	#NULL!	5583.97	3561.83	#NULL!	#NULL!	3613.27	4064.42	#NULL!	#NULL!	#NULL!	#NULL!	512	517	1	2	8	8	8	8	8	8	8	8	8	8	2	8	8	8	8	1	1	1	1	0	#NULL!	8
A907973801	A907973	2010	1	1	1	A907	1	71	#NULL!	3	2	1	5	5583.97	4115.8	4415.28	#NULL!	4460.09	4138.16	#NULL!	4392.03	#NULL!	#NULL!	512	517	1	2	8	2	8	8	2	8	1	8	1	1	1	1	1	1	2	1	1	1	1	0	0	2
A907973802	A907973	2010	1	1	1	A907	2	51	#NULL!	1	2	1	6	5583.97	7058.61	5058.51	29144.2	7434.72	6840.28	28484.6	5293.81	32760.9	32252.3	512	517	1	2	8	2	8	8	1	2	1	8	2	8	1	2	1	1	2	1	1	1	1	0	1	1
A907975501	A907975	2010	1	1	1	A907	1	60	#NULL!	4	4	4	7	5583.97	7655.74	5023.68	#NULL!	7254.85	7679.1	#NULL!	5470.39	#NULL!	#NULL!	512	517	1	1	1	2	8	8	2	8	1	8	2	8	1	1	2	2	2	1	1	1	2	1	0	2
A907976401	A907976	2010	1	1	1	A907	1	36	#NULL!	1	1	3	7	5583.97	7733.32	#NULL!	18319.6	9403.9	10415.9	#NULL!	#NULL!	24730.6	#NULL!	512	517	1	2	8	8	8	8	2	8	2	3	1	1	2	8	8	8	8	1	1	1	1	0	0	1
A907976402	A907976	2010	1	1	1	A907	2	74	#NULL!	2	1	1	6	5583.97	3455.47	#NULL!	#NULL!	2976.78	2974.81	#NULL!	#NULL!	#NULL!	#NULL!	512	517	1	2	8	2	8	8	2	8	1	8	1	1	1	1	1	1	2	1	1	1	1	0	0	2
A907976801	A907976	2010	1	1	1	A907	2	62	#NULL!	2	2	2	3	5583.97	3585.38	3856.25	8464.97	3584.49	3247.93	14882	4036.21	8171.82	15017.8	512	517	1	2	8	1	2	2	2	8	1	8	1	2	2	8	8	8	8	1	1	1	2	1	0	2
A907978101	A907978	2010	1	1	1	A907	1	58	#NULL!	2	2	3	6	5583.97	5307.88	6797.46	8435.7	5964.62	5630.09	17457	7625	9026.82	20061.1	512	517	1	2	8	2	8	8	2	8	1	8	2	8	1	1	2	2	1	1	1	1	1	0	0	2
A907978102	A907978	2010	1	1	1	A907	2	55	#NULL!	2	2	2	3	5583.97	4752.55	3918.75	#NULL!	4548.12	3522.58	#NULL!	4086.34	#NULL!	#NULL!	512	517	1	2	8	1	3	2	2	8	2	3	2	8	2	8	8	8	8	1	1	1	2	1	0	2
A907978103	A907978	2010	1	1	1	A907	1	28	#NULL!	2	2	4	7	5583.97	11297.8	#NULL!	12910.3	13219.7	14442	#NULL!	#NULL!	15899	#NULL!	512	517	1	1	2	8	8	8	2	8	1	8	1	1	1	1	2	1	1	1	1	1	1	0	0	1
A907978201	A907978	2010	1	1	1	A907	1	61	#NULL!	#NULL!	#NULL!	1	7	5583.97	3827.87	#NULL!	5605.85	3627.42	3839.55	#NULL!	#NULL!	6214.53	#NULL!	512	517	1	2	8	2	8	8	2	8	1	8	2	8	1	1	1	1	2	1	1	1	1	0	0	2
A907979201	A907979	2010	1	1	1	A907	1	45	#NULL!	1	2	4	5	5583.97	11884.9	9579.4	23858	14272.5	11858.4	29608.4	12696	28663.2	39160.8	512	517	1	1	2	2	8	8	2	8	1	8	2	8	1	1	2	2	1	1	1	1	1	0	0	2
A907979202	A907979	2010	1	1	1	A907	2	41	#NULL!	2	2	3	2	5583.97	6914.36	8800.3	#NULL!	6894.57	6441.01	#NULL!	8184.75	#NULL!	#NULL!	512	517	1	2	8	1	3	2	2	8	1	8	2	8	1	2	1	1	2	1	1	1	1	0	0	2
A907979203	A907979	2010	1	1	1	A907	1	16	#NULL!	2	2	2	7	5583.97	6740.12	#NULL!	28273.5	7308.99	9938.57	#NULL!	#NULL!	20857.2	#NULL!	512	517	1	2	8	8	8	8	8	8	1	8	1	1	2	8	8	8	8	1	1	1	1	0	#NULL!	2
A907979204	A907979	2010	1	1	1	A907	2	11	#NULL!	2	2	1	#NULL!	5583.97	5220.32	#NULL!	#NULL!	5134.47	5063.1	#NULL!	#NULL!	#NULL!	#NULL!	512	517	1	2	8	8	8	8	8	8	8	8	8	8	1	1	1	1	1	1	1	1	1	0	#NULL!	8
A908972101	A908972	2010	1	1	1	A908	2	69	#NULL!	3	2	1	7	4587.02	2128.75	#NULL!	4192.54	2190.56	2343.75	#NULL!	#NULL!	4154.07	#NULL!	512	517	1	2	8	1	2	2	2	8	1	8	2	8	2	8	8	8	8	1	1	1	1	0	0	2
A908974501	A908974	2010	1	1	1	A908	1	65	#NULL!	4	4	4	1	4587.02	7475.66	9966.54	13996.2	2716.51	7097.97	21854.1	11151.8	15268.8	25384.5	512	517	1	2	8	2	8	8	2	8	1	8	2	8	2	8	8	8	8	1	1	1	1	0	0	2
A908974701	A908974	2010	1	1	1	A908	2	39	#NULL!	4	4	4	1	4587.02	8735.68	#NULL!	15081.1	8978.25	6652.63	#NULL!	#NULL!	13768.8	#NULL!	512	517	1	2	8	8	8	8	2	8	1	8	2	8	2	8	8	8	8	1	1	1	1	0	0	2
A908974703	A908974	2010	1	1	1	A908	1	4	50	4	4	1	#NULL!	4587.02	3980.58	#NULL!	#NULL!	4076.37	5126.7	#NULL!	#NULL!	#NULL!	#NULL!	512	517	1	2	8	8	8	8	8	8	8	8	8	8	8	8	8	8	8	8	8	8	8	#NULL!	#NULL!	8
A908974901	A908974	2010	1	1	1	A908	2	51	#NULL!	3	3	2	3	4587.02	5726.79	8208.15	#NULL!	6031.94	5549.66	#NULL!	8589.96	#NULL!	#NULL!	512	517	1	2	8	2	8	8	2	8	1	8	2	8	2	8	8	8	8	1	1	1	1	0	0	2
A908974902	A908974	2010	1	1	1	A908	1	56	#NULL!	3	3	4	1	4587.02	6459.59	#NULL!	13688.1	7258.84	6851.71	#NULL!	#NULL!	14647.3	#NULL!	512	517	1	2	8	1	2	2	2	8	1	8	2	8	2	8	8	8	8	1	1	1	1	0	0	2
A908975301	A908975	2010	1	1	1	A908	2	25	#NULL!	3	4	4	1	4587.02	16567.2	#NULL!	10662.6	15506.8	12843	#NULL!	#NULL!	11926	#NULL!	512	517	1	2	8	8	8	8	2	8	1	8	2	8	2	8	8	8	8	1	1	1	1	0	0	2
A908975501	A908975	2010	1	1	1	A908	1	26	#NULL!	3	3	4	3	4587.02	9166.16	#NULL!	#NULL!	10725.4	11717.1	#NULL!	#NULL!	#NULL!	#NULL!	512	517	1	2	8	8	8	8	2	8	1	8	2	8	2	8	8	8	8	1	1	1	1	0	0	1
A908975502	A908975	2010	1	1	1	A908	2	53	#NULL!	3	3	2	3	4587.02	3817.86	4104.08	15763.5	4021.29	3699.77	11555.1	4294.98	17719.7	13083.5	512	517	1	2	8	2	8	8	2	8	1	8	2	8	2	8	8	8	8	1	1	1	1	0	0	2
A908975701	A908975	2010	1	1	1	A908	2	52	#NULL!	1	2	4	2	4587.02	3817.86	#NULL!	#NULL!	4021.29	3699.77	#NULL!	#NULL!	#NULL!	#NULL!	512	517	1	2	8	2	8	8	2	8	1	8	2	8	2	8	8	8	8	2	1	1	2	1	0	2
A908975703	A908975	2010	1	1	1	A908	2	20	#NULL!	1	2	3	7	4587.02	5142.68	#NULL!	#NULL!	6554.67	7333.33	#NULL!	#NULL!	#NULL!	#NULL!	512	517	1	2	8	8	8	8	2	8	1	8	2	8	2	8	8	8	8	1	1	1	1	0	0	2
A908975901	A908975	2010	1	1	1	A908	1	68	#NULL!	4	3	3	7	4587.02	2491.89	3322.18	9330.82	2716.51	2365.99	14569.4	3717.28	10179.2	16923	512	517	1	2	8	2	8	8	1	1	1	8	2	8	1	1	2	2	2	2	2	1	2	1	1	2
A908975902	A908975	2010	1	1	1	A908	2	62	#NULL!	4	3	3	7	4587.02	2908.9	3128.66	#NULL!	2908.17	2635.11	#NULL!	3274.66	#NULL!	#NULL!	512	517	1	2	8	2	8	8	2	8	1	8	2	8	2	8	8	8	8	1	1	1	1	0	0	2
A908976401	A908976	2010	1	1	1	A908	2	68	#NULL!	2	1	1	7	4587.02	2128.75	3055.6	#NULL!	#NULL!	#NULL!	#NULL!	#NULL!	#NULL!	#NULL!	512	517	1	2	8	2	8	8	2	8	1	8	2	8	2	8	8	8	8	1	1	1	1	0	0	2
A908976801	A908976	2010	1	1	1	A908	1	45	#NULL!	3	3	#NULL!	#NULL!	4587.02	9642.46	7771.97	9678.26	#NULL!	#NULL!	12011	#NULL!	#NULL!	#NULL!	512	517	1	1	2	2	8	8	2	8	1	8	2	8	1	1	1	1	2	1	2	1	1	0	0	2
A908976802	A908976	2010	1	1	1	A908	2	42	#NULL!	3	3	4	7	4587.02	5609.76	7139.87	11808.9	11187.4	10451.4	15951.1	13280.9	38046.7	33029.2	512	517	1	2	8	2	8	8	2	8	1	8	2	8	2	8	8	8	8	1	1	1	1	0	0	2
A908976803	A908976	2010	1	1	1	A908	1	16	#NULL!	3	3	2	7	4587.02	5468.4	#NULL!	#NULL!	#NULL!	#NULL!	#NULL!	#NULL!	#NULL!	#NULL!	512	517	1	1	2	8	8	8	8	8	1	8	1	1	1	2	2	2	2	2	2	1	1	0	#NULL!	1
A908976804	A908976	2010	1	1	1	A908	1	15	#NULL!	3	3	1	7	4587.02	5468.4	#NULL!	#NULL!	11859.9	16126.7	#NULL!	#NULL!	#NULL!	#NULL!	512	517	1	1	2	8	8	8	8	8	1	8	2	8	1	1	2	2	2	1	1	1	1	0	#NULL!	2
A908977201	A908977	2010	1	1	1	A908	1	59	#NULL!	1	1	1	7	4587.02	8612.78	11029.8	9125.41	4839.22	9135.62	14163.2	12372.6	9764.86	16276	512	517	1	2	8	2	8	8	2	8	1	8	2	8	2	8	8	8	8	1	1	1	1	0	0	2
A908977401	A908977	2010	1	1	1	A908	1	52	#NULL!	2	3	2	5	4587.02	7559.38	7343	#NULL!	17461.2	18804.1	#NULL!	9173.59	#NULL!	#NULL!	512	517	1	2	8	2	8	8	2	8	1	8	2	8	2	8	8	8	8	1	1	1	1	0	0	2
A908977404	A908977	2010	1	1	1	A908	1	20	#NULL!	3	3	3	7	4587.02	8163.75	#NULL!	11646.6	#NULL!	#NULL!	#NULL!	#NULL!	#NULL!	#NULL!	512	517	1	2	8	8	8	8	2	8	1	8	2	8	2	8	8	8	8	1	1	1	1	0	0	1
A908977701	A908977	2010	1	1	1	A908	2	53	#NULL!	2	3	1	6	4587.02	3817.86	4104.08	15763.5	4021.29	3699.77	11555.1	4294.98	17719.7	13083.5	512	517	1	2	8	2	8	8	2	8	1	8	2	8	2	8	8	8	8	1	1	1	1	0	0	2
A908977702	A908977	2010	1	1	1	A908	2	24	#NULL!	2	3	4	7	4587.02	5142.68	#NULL!	#NULL!	6554.67	7333.33	#NULL!	#NULL!	#NULL!	#NULL!	512	517	1	2	8	8	8	8	2	8	1	8	2	8	2	8	8	8	8	1	1	1	1	0	0	2
A908978101	A908978	2010	1	1	1	A908	1	37	#NULL!	2	2	4	3	4587.02	6274.2	#NULL!	29726.2	12716	14084.4	#NULL!	#NULL!	25080.5	#NULL!	512	517	1	1	2	8	8	8	2	8	1	8	2	8	1	2	1	2	2	2	2	1	1	0	0	2
A908978102	A908978	2010	1	1	1	A908	1	62	#NULL!	2	2	1	7	4587.02	3105.63	4075.82	#NULL!	#NULL!	#NULL!	#NULL!	#NULL!	#NULL!	#NULL!	512	517	1	1	1	2	8	8	2	8	1	8	2	8	1	2	1	2	2	2	2	1	1	0	0	2
A908978103	A908978	2010	1	1	1	A908	2	62	#NULL!	3	2	1	7	4587.02	2908.9	3128.66	#NULL!	4846.95	4391.85	#NULL!	9823.98	#NULL!	#NULL!	512	517	1	2	8	2	8	8	2	8	1	8	2	8	2	8	8	8	8	1	1	1	1	0	0	2
A908978104	A908978	2010	1	1	1	A908	2	41	#NULL!	2	2	3	7	4587.02	5609.76	7139.87	#NULL!	#NULL!	#NULL!	#NULL!	#NULL!	#NULL!	#NULL!	512	517	1	2	8	2	8	8	2	8	1	8	2	8	2	8	8	8	8	1	1	1	1	0	0	1
A908978105	A908978	2010	1	1	1	A908	1	13	#NULL!	2	2	1	#NULL!	4587.02	4765.59	#NULL!	8835.63	7175.2	6732.64	#NULL!	#NULL!	11835.8	#NULL!	512	517	1	2	8	8	8	8	8	8	1	8	2	8	2	8	8	8	8	1	1	1	1	0	#NULL!	2
A908978201	A908978	2010	1	1	1	A908	1	58	#NULL!	3	3	4	#NULL!	4587.02	4306.39	5514.92	#NULL!	4839.22	4567.81	#NULL!	6186.32	#NULL!	#NULL!	512	517	1	2	8	2	8	8	2	8	1	8	2	8	2	8	8	8	8	1	1	1	1	0	0	2
A908978202	A908978	2010	1	1	1	A908	2	56	#NULL!	3	3	4	7	4587.02	3855.84	3179.36	#NULL!	3689.98	2857.95	#NULL!	3315.33	#NULL!	#NULL!	512	517	1	2	8	2	8	8	2	8	1	8	2	8	2	8	8	8	8	1	1	1	1	0	0	2
A908978203	A908978	2010	1	1	1	A908	1	29	#NULL!	3	3	4	7	4587.02	9166.16	#NULL!	20948.7	10725.4	11717.1	#NULL!	#NULL!	25798.3	#NULL!	512	517	1	2	8	8	8	8	2	8	1	8	2	8	2	8	8	8	8	1	1	1	1	0	0	1
A908979201	A908979	2010	1	1	1	A908	2	30	#NULL!	4	4	4	1	4587.02	5353.75	#NULL!	9474.45	4833.65	5142.55	#NULL!	#NULL!	9422.23	#NULL!	512	517	1	2	8	8	8	8	2	8	1	8	2	8	2	8	8	8	8	1	1	1	1	0	0	1
A909967801	A909967	2010	1	1	2	A909	1	70	#NULL!	3	2	3	7	3627.02	1683.24	#NULL!	#NULL!	1824.04	1692.39	#NULL!	#NULL!	#NULL!	#NULL!	501	501	1	1	2	2	8	8	2	8	1	8	2	8	1	1	1	1	1	1	1	1	1	0	0	2
A909967802	A909967	2010	1	1	2	A909	2	67	#NULL!	3	2	3	7	3627.02	1609.59	4620.8	#NULL!	1656.33	1772.15	#NULL!	4787.75	#NULL!	#NULL!	501	501	1	2	8	2	8	8	2	8	1	8	2	8	2	8	8	8	8	1	1	1	1	0	0	2
A909968201	A909968	2010	1	1	2	A909	1	51	#NULL!	4	4	4	2	3627.02	5715.79	5552.19	9645.3	6575.92	5832.62	18417.7	6936.33	12018.1	24252.9	501	501	1	1	2	2	8	8	2	8	1	8	1	1	2	8	8	8	8	1	1	1	1	0	0	2
A909968202	A909968	2010	1	1	2	A909	2	46	#NULL!	4	4	4	2	3627.02	4378.91	4497.18	#NULL!	4662.61	3500.99	#NULL!	4785.67	#NULL!	#NULL!	501	501	1	2	8	2	8	8	2	8	1	8	2	8	2	8	8	8	8	1	1	1	1	0	0	2
A909968203	A909968	2010	1	1	2	A909	2	19	#NULL!	4	4	3	7	3627.02	6828.35	#NULL!	8467.12	6283.54	4918.45	#NULL!	#NULL!	6239.16	#NULL!	501	501	1	1	2	8	8	8	2	8	1	8	2	8	2	8	8	8	8	1	1	1	1	0	0	2
A909968502	A909968	2010	1	1	2	A909	2	66	#NULL!	3	2	1	7	3627.02	1609.59	2310.4	#NULL!	1656.33	1772.15	#NULL!	2393.88	#NULL!	#NULL!	501	501	1	1	2	2	8	8	2	8	2	3	1	1	1	2	2	1	2	1	1	1	1	0	0	2
A909969302	A909969	2010	1	1	2	A909	2	46	#NULL!	4	4	4	7	3627.02	8757.83	8994.36	#NULL!	6216.81	5834.98	#NULL!	9571.34	#NULL!	#NULL!	501	501	1	2	8	2	8	8	2	8	1	8	2	8	2	8	8	8	8	1	1	1	1	0	0	2
A909969304	A909969	2010	1	1	2	A909	2	14	#NULL!	4	4	1	#NULL!	3627.02	6404.87	#NULL!	11285.9	4199.7	5176.65	#NULL!	#NULL!	12753.2	#NULL!	501	501	1	2	8	8	8	8	8	8	1	8	2	8	2	8	8	8	8	1	1	1	1	0	#NULL!	1
A909969305	A909969	2010	1	1	2	A909	2	9	#NULL!	4	4	1	#NULL!	3627.02	2185.02	#NULL!	#NULL!	2216.58	4155.57	#NULL!	#NULL!	#NULL!	#NULL!	501	501	1	2	8	8	8	8	8	8	8	8	8	8	2	8	8	8	8	1	1	1	1	0	#NULL!	8
A909970101	A909970	2010	1	1	2	A909	1	52	#NULL!	4	4	4	2	3627.02	5715.79	5552.19	19290.6	6575.92	5832.62	18417.7	6936.33	24036.2	24252.9	501	501	1	1	1	2	8	8	2	8	3	3	1	2	1	1	2	2	1	1	1	1	1	0	0	2
A909970102	A909970	2010	1	1	2	A909	2	53	#NULL!	4	4	4	1	3627.02	2886.76	3103.17	#NULL!	3040.58	2797.47	#NULL!	3247.52	#NULL!	#NULL!	501	501	1	2	8	2	8	8	1	2	1	8	2	8	2	8	8	8	8	1	1	1	1	0	1	2
A909970103	A909970	2010	1	1	2	A909	2	27	#NULL!	4	4	4	7	3627.02	6263.38	#NULL!	#NULL!	5862.49	4855.44	#NULL!	#NULL!	#NULL!	#NULL!	501	501	1	1	1	8	8	8	2	8	1	8	1	1	1	1	2	2	1	1	1	1	1	0	0	2
A909970301	A909970	2010	1	1	2	A909	1	56	#NULL!	4	4	4	2	3627.02	4341.53	4169.94	#NULL!	3659.03	4605.08	#NULL!	4677.6	#NULL!	#NULL!	501	501	1	1	2	2	8	8	2	8	1	8	2	8	2	8	8	8	8	1	1	1	1	0	0	2
A909970302	A909970	2010	1	1	2	A909	2	54	#NULL!	4	4	3	7	3627.02	3849.02	3103.17	11919.1	3040.58	3729.96	17474	3247.52	13398.2	19785.4	501	501	1	2	8	1	2	2	2	8	1	8	1	1	2	8	8	8	8	1	1	1	1	0	0	2
A909970303	A909970	2010	1	1	2	A909	1	21	#NULL!	4	4	3	7	3627.02	8230.36	#NULL!	11741.6	13476.7	18763.3	#NULL!	#NULL!	17083.5	#NULL!	501	501	1	1	2	8	8	8	2	8	1	8	1	1	1	1	2	1	2	1	1	1	1	0	0	1
A909971501	A909971	2010	1	1	2	A909	1	63	#NULL!	2	2	3	6	3627.02	4696.46	6163.62	6877.88	2225.26	4710.79	12834.9	6711.68	7624.68	13192.3	501	501	1	2	8	2	8	8	2	8	1	8	2	8	2	8	8	8	8	1	1	1	1	0	0	2
A909972001	A909972	2010	1	1	2	A909	1	46	#NULL!	#NULL!	#NULL!	4	2	3627.02	7290.86	5876.54	#NULL!	8755.52	7274.59	#NULL!	7788.46	#NULL!	#NULL!	501	501	1	2	8	2	8	8	2	8	1	8	2	8	1	1	2	1	2	1	1	1	1	0	0	2
A909972002	A909972	2010	1	1	2	A909	2	44	#NULL!	#NULL!	#NULL!	4	7	3627.02	4241.65	5398.59	17857.9	4229.51	3951.27	24121.8	5020.98	14383.9	24974	501	501	1	2	8	2	8	8	2	8	1	8	1	1	1	1	1	1	2	1	1	1	1	0	0	2
A909972003	A909972	2010	1	1	2	A909	2	18	#NULL!	#NULL!	#NULL!	3	7	3627.02	6828.35	#NULL!	11289.5	6283.54	4918.45	#NULL!	#NULL!	8318.88	#NULL!	501	501	1	2	8	8	8	8	8	8	1	8	2	8	2	8	8	8	8	1	1	1	1	0	#NULL!	1
A909972004	A909972	2010	1	1	2	A909	2	15	#NULL!	#NULL!	#NULL!	1	7	3627.02	6828.35	#NULL!	#NULL!	6283.54	4918.45	#NULL!	#NULL!	#NULL!	#NULL!	501	501	1	2	8	8	8	8	8	8	1	8	1	2	2	8	8	8	8	1	1	1	1	0	#NULL!	1
A909973101	A909973	2010	1	1	2	A909	1	50	#NULL!	4	4	4	1	3627.02	7621.06	8328.28	12860.4	8767.89	7776.83	27626.6	10404.5	16024.1	36379.4	501	501	1	1	2	2	8	8	2	8	1	8	2	8	1	1	1	1	1	1	1	1	1	0	0	2
A909973102	A909973	2010	1	1	2	A909	2	48	#NULL!	4	4	4	1	3627.02	5838.55	6745.77	#NULL!	6216.81	4667.98	#NULL!	7178.51	#NULL!	#NULL!	501	501	1	2	8	2	8	8	2	8	1	8	2	8	2	8	8	8	8	1	1	1	1	0	0	2
A909973103	A909973	2010	1	1	2	A909	2	22	#NULL!	4	4	4	7	3627.02	5184.64	#NULL!	8314.98	6608.15	7393.17	#NULL!	#NULL!	10054	#NULL!	501	501	1	2	8	8	8	8	2	8	1	8	2	8	2	8	8	8	8	1	1	1	1	0	0	1
A909973701	A909973	2010	1	1	2	A909	2	52	#NULL!	1	2	3	7	3627.02	2886.76	3103.17	11919.1	4054.11	3729.96	17474	6495.04	13398.2	19785.4	501	501	1	2	8	2	8	8	2	8	1	8	1	2	2	8	8	8	8	1	1	1	1	0	0	2
A909973702	A909973	2010	1	1	2	A909	1	52	#NULL!	1	2	3	5	3627.02	5715.79	5552.19	#NULL!	#NULL!	#NULL!	#NULL!	#NULL!	#NULL!	#NULL!	501	501	1	2	8	2	8	8	2	8	2	3	1	1	2	8	8	8	8	1	1	1	1	0	0	2
A909973703	A909973	2010	1	1	2	A909	1	23	#NULL!	2	2	3	1	3627.02	6172.77	#NULL!	11741.6	17968.9	18763.3	#NULL!	#NULL!	17083.5	#NULL!	501	501	1	1	2	8	8	8	2	8	1	8	2	8	1	1	2	2	2	1	1	1	1	0	0	2
A909973704	A909973	2010	1	1	2	A909	2	26	#NULL!	1	2	4	7	3627.02	6263.38	#NULL!	#NULL!	7816.66	6473.92	#NULL!	#NULL!	#NULL!	#NULL!	501	501	1	1	2	8	8	8	2	8	1	8	2	8	1	1	2	1	1	1	1	1	1	0	0	1
A909974201	A909974	2010	1	1	2	A909	1	37	#NULL!	#NULL!	#NULL!	4	2	3627.02	4744.05	#NULL!	11238.3	7691.83	7667.63	#NULL!	#NULL!	15171.1	#NULL!	501	501	1	2	8	8	8	8	2	8	1	8	2	8	1	2	1	2	2	1	1	1	1	0	0	2
A909974202	A909974	2010	1	1	2	A909	2	34	#NULL!	#NULL!	#NULL!	4	1	3627.02	4048.08	#NULL!	#NULL!	4873.09	4666.06	#NULL!	#NULL!	#NULL!	#NULL!	501	501	1	2	8	8	8	8	2	8	1	8	2	8	2	8	8	8	8	1	1	1	1	0	0	2
A909974203	A909974	2010	1	1	2	A909	1	6	72	#NULL!	#NULL!	1	#NULL!	3627.02	2418.47	#NULL!	#NULL!	2502.97	2959.85	#NULL!	#NULL!	#NULL!	#NULL!	501	501	1	2	8	8	8	8	8	8	8	8	8	8	2	8	8	8	8	1	1	1	1	0	#NULL!	8
A909974204	A909974	2010	1	1	2	A909	2	3	42	#NULL!	#NULL!	1	#NULL!	3627.02	2766.84	#NULL!	#NULL!	2845.45	2745.84	#NULL!	#NULL!	#NULL!	#NULL!	501	501	1	8	8	8	8	8	8	8	8	8	8	8	8	8	8	8	8	8	8	8	8	#NULL!	#NULL!	8
A909974205	A909974	2010	1	1	2	A909	1	68	#NULL!	#NULL!	#NULL!	3	1	3627.02	1884.16	5023.93	#NULL!	#NULL!	#NULL!	#NULL!	#NULL!	#NULL!	#NULL!	501	501	1	2	8	2	8	8	2	8	1	8	1	1	2	8	8	8	8	1	1	1	1	0	0	2
A909974206	A909974	2010	1	1	2	A909	2	66	#NULL!	#NULL!	#NULL!	1	7	3627.02	1609.59	#NULL!	6340.13	2208.44	2126.59	#NULL!	#NULL!	6281.95	#NULL!	501	501	1	2	8	2	8	8	2	8	1	8	1	1	2	8	8	8	8	1	1	1	1	0	0	2
A909975002	A909975	2010	1	1	2	A909	2	41	#NULL!	4	4	4	7	3627.02	8483.3	#NULL!	#NULL!	8459.03	5268.36	#NULL!	#NULL!	#NULL!	#NULL!	501	501	1	2	8	2	8	8	2	8	1	8	2	8	2	8	8	8	8	1	1	1	1	0	0	2
A909975003	A909975	2010	1	1	2	A909	1	9	#NULL!	4	4	1	#NULL!	3627.02	2418.47	#NULL!	#NULL!	2502.97	3288.72	#NULL!	#NULL!	#NULL!	#NULL!	501	501	1	2	8	8	8	8	8	8	8	8	8	8	2	8	8	8	8	1	1	1	1	0	#NULL!	8
A909975004	A909975	2010	1	1	2	A909	1	6	81	4	4	1	#NULL!	3627.02	2418.47	#NULL!	#NULL!	2502.97	3288.72	#NULL!	#NULL!	#NULL!	#NULL!	501	501	1	2	8	8	8	8	8	8	8	8	8	8	2	8	8	8	8	1	1	1	1	0	#NULL!	8
A909975901	A909975	2010	1	1	2	A909	1	40	#NULL!	4	4	4	1	3627.02	6085.99	4836.68	13226.5	4804.84	7842.29	19713.8	6113.42	19822.4	27392.9	501	501	1	2	8	2	8	8	2	8	1	8	1	1	2	8	8	8	8	1	1	1	1	0	0	2
A909975903	A909975	2010	1	1	2	A909	2	11	#NULL!	4	4	1	#NULL!	3627.02	3202.44	#NULL!	#NULL!	3149.77	3882.49	#NULL!	#NULL!	#NULL!	#NULL!	501	501	1	2	8	8	8	8	8	8	8	8	8	8	2	8	8	8	8	1	1	1	1	0	#NULL!	8
A909975904	A909975	2010	1	1	2	A909	2	66	#NULL!	4	4	1	7	3627.02	2146.12	2310.4	#NULL!	1656.33	2215.19	#NULL!	2393.88	#NULL!	#NULL!	501	501	1	2	8	2	8	8	2	8	1	8	1	2	2	8	8	8	8	1	1	1	1	0	0	2
A909975905	A909975	2010	1	1	2	A909	2	35	#NULL!	4	4	4	7	3627.02	4403.48	#NULL!	11403.1	3394.31	4191.82	#NULL!	#NULL!	13013.6	#NULL!	501	501	1	2	8	8	8	8	2	8	1	8	2	8	2	8	8	8	8	1	1	1	1	0	0	1
A909976401	A909976	2010	1	1	2	A909	1	57	#NULL!	2	3	4	7	3627.02	9768.45	8339.88	#NULL!	5488.55	10361.4	#NULL!	9355.19	#NULL!	#NULL!	501	501	1	1	1	2	8	8	2	8	1	8	2	8	1	1	2	1	1	1	1	1	1	0	0	2
A909977502	A909977	2010	1	1	2	A909	2	54	#NULL!	3	3	1	6	3627.02	8660.28	3103.17	#NULL!	#NULL!	#NULL!	#NULL!	#NULL!	#NULL!	#NULL!	501	501	1	2	8	2	8	8	2	8	1	8	1	1	2	8	8	8	8	1	1	1	1	0	0	2
A909978202	A909978	2010	1	1	2	A909	2	78	#NULL!	4	4	2	7	3627.02	2346.63	#NULL!	#NULL!	2361.51	2593.4	#NULL!	#NULL!	#NULL!	#NULL!	501	501	1	2	8	2	8	8	2	8	3	3	1	1	2	8	8	8	8	1	1	1	1	0	0	2
A909979001	A909979	2010	1	1	2	A909	1	57	#NULL!	4	4	4	1	3627.02	3256.15	4169.94	#NULL!	#NULL!	#NULL!	#NULL!	#NULL!	#NULL!	#NULL!	501	501	1	1	2	2	8	8	2	8	1	8	2	8	1	1	2	1	2	1	1	1	1	0	0	2
A909979002	A909979	2010	1	1	2	A909	2	56	#NULL!	4	4	4	7	3627.02	2915.48	2403.98	#NULL!	4185.1	3241.42	#NULL!	5013.57	#NULL!	#NULL!	501	501	1	1	2	2	8	8	2	8	2	3	2	8	1	1	2	2	1	1	1	1	1	0	0	2
A909979003	A909979	2010	1	1	2	A909	1	27	#NULL!	4	4	4	2	3627.02	6930.71	#NULL!	15839.7	12164.5	13289.3	#NULL!	#NULL!	19506.6	#NULL!	501	501	1	1	2	8	8	8	2	8	1	8	1	1	1	1	2	1	1	1	1	1	1	0	0	1
A910966101	A910966	2010	1	1	2	A910	1	46	#NULL!	3	4	4	1	3494.34	7850.52	6327.64	#NULL!	9427.61	7833.01	#NULL!	8386.32	#NULL!	#NULL!	501	501	1	2	8	2	8	8	2	8	1	8	2	8	1	1	1	1	2	1	1	1	1	0	0	1
A910966102	A910966	2010	1	1	2	A910	2	47	#NULL!	3	4	3	7	3494.34	4715.05	4842.4	#NULL!	5020.52	3769.73	#NULL!	5153.03	#NULL!	#NULL!	501	501	1	2	8	2	8	8	2	8	1	8	1	1	2	8	8	8	8	1	1	1	1	0	0	1
A910966103	A910966	2010	1	1	2	A910	2	13	#NULL!	4	4	1	#NULL!	3494.34	3448.26	#NULL!	6076.12	3391.56	3344.41	#NULL!	#NULL!	10299.1	#NULL!	501	501	1	2	8	8	8	8	8	8	1	8	2	8	2	8	8	8	8	1	1	1	1	0	#NULL!	1
A910966104	A910966	2010	1	1	2	A910	2	9	#NULL!	3	4	1	#NULL!	3494.34	2352.75	#NULL!	#NULL!	2386.73	2684.73	#NULL!	#NULL!	#NULL!	#NULL!	501	501	1	2	8	8	8	8	8	8	8	8	8	8	2	8	8	8	8	1	1	1	1	0	#NULL!	8
A910966501	A910966	2010	1	1	2	A910	1	70	#NULL!	4	3	4	7	3494.34	1812.45	2916.5	#NULL!	1964.06	1822.3	#NULL!	2901.14	#NULL!	#NULL!	501	501	1	2	8	2	8	8	2	8	1	8	2	8	2	8	8	8	8	1	1	1	1	0	0	2
A910966502	A910966	2010	1	1	2	A910	2	63	#NULL!	4	3	3	7	3494.34	2368.31	2547.23	#NULL!	2367.72	2145.41	#NULL!	2666.1	#NULL!	#NULL!	501	501	1	2	8	2	8	8	2	8	2	3	2	8	2	8	8	8	8	1	1	1	1	0	0	2
A910966701	A910966	2010	1	1	2	A910	1	54	#NULL!	1	1	4	1	3494.34	9231.83	5978.39	20771.4	7080.7	9420.52	19831.5	7468.78	25881.3	26114.6	501	501	1	2	8	2	8	8	2	8	1	8	2	8	2	8	8	8	8	1	1	1	1	0	0	2
A910966702	A910966	2010	1	1	2	A910	2	50	#NULL!	1	1	3	7	3494.34	4662.53	3341.38	#NULL!	3273.98	4518.32	#NULL!	3496.81	#NULL!	#NULL!	501	501	1	2	8	2	8	8	2	8	1	8	1	2	2	8	8	8	8	1	1	1	1	0	0	2
A910967301	A910967	2010	1	1	2	A910	2	57	#NULL!	3	3	1	3	3494.34	4708.92	2588.52	#NULL!	3004.24	3490.24	#NULL!	2699.21	#NULL!	#NULL!	501	501	1	2	8	2	8	8	2	8	1	8	2	8	2	8	8	8	8	1	1	1	1	0	0	2
A910967302	A910967	2010	1	1	2	A910	1	27	#NULL!	3	3	3	7	3494.34	11194.1	#NULL!	17055.6	8732.22	14309.4	#NULL!	#NULL!	21004	#NULL!	501	501	1	2	8	8	8	8	2	8	1	8	2	8	2	8	8	8	8	1	1	1	1	0	0	2
A910967501	A910967	2010	1	1	2	A910	1	56	#NULL!	2	2	3	5	3494.34	3506.1	4490.04	7429.56	5253.21	4958.58	11531.2	5036.66	15900.3	13251.3	501	501	1	1	2	2	8	8	2	8	1	8	1	1	2	8	8	8	8	1	1	1	1	0	0	2
A910967502	A910967	2010	1	1	2	A910	2	54	#NULL!	2	2	3	5	3494.34	3108.36	3341.38	#NULL!	4365.31	4016.28	#NULL!	3496.81	#NULL!	#NULL!	501	501	1	2	8	2	8	8	2	8	1	8	2	8	1	1	1	1	2	1	1	1	1	0	0	2
A910967503	A910967	2010	1	1	2	A910	1	28	#NULL!	2	2	3	7	3494.34	7462.73	#NULL!	11370.4	#NULL!	#NULL!	#NULL!	#NULL!	#NULL!	#NULL!	501	501	1	1	2	8	8	8	2	8	1	8	1	1	1	2	1	2	2	1	1	1	1	0	0	2
A910967504	A910967	2010	1	1	2	A910	1	37	#NULL!	1	2	3	5	3494.34	5108.22	#NULL!	#NULL!	8282.28	9173.57	#NULL!	#NULL!	#NULL!	#NULL!	501	501	1	2	8	8	8	8	2	8	1	8	2	8	1	1	2	2	2	1	1	1	1	0	0	2
A910968901	A910968	2010	1	1	2	A910	1	66	#NULL!	4	3	4	7	3494.34	3043.2	5409.58	#NULL!	3317.52	2889.45	#NULL!	6052.93	#NULL!	#NULL!	501	501	1	2	8	2	8	8	2	8	1	8	1	1	2	8	8	8	8	1	1	1	1	0	0	2
A910968902	A910968	2010	1	1	2	A910	2	65	#NULL!	4	3	3	7	3494.34	2599.71	#NULL!	10240.2	2675.21	2862.28	#NULL!	#NULL!	10146.3	#NULL!	501	501	1	2	8	2	8	8	2	8	2	3	2	8	2	8	8	8	8	1	1	1	1	0	0	2
A910969001	A910969	2010	1	1	2	A910	1	57	#NULL!	3	3	3	2	3494.34	4674.8	4490.04	#NULL!	3939.91	4958.58	#NULL!	5036.66	#NULL!	#NULL!	501	501	1	2	8	2	8	8	2	8	1	8	2	8	2	8	8	8	8	1	1	1	1	0	0	2
A910969002	A910969	2010	1	1	2	A910	2	29	#NULL!	3	3	4	7	3494.34	8992.24	#NULL!	8681.1	6312.51	6970.88	#NULL!	#NULL!	9709.65	#NULL!	501	501	1	2	8	8	8	8	2	8	1	8	1	1	2	8	8	8	8	1	1	1	1	0	0	2
A910969003	A910969	2010	1	1	2	A910	1	29	#NULL!	3	3	4	1	3494.34	9950.31	#NULL!	11370.4	8732.22	12719.5	#NULL!	#NULL!	14002.7	#NULL!	501	501	1	2	8	8	8	8	2	8	1	8	2	8	2	8	8	8	8	1	1	1	1	0	0	2
A910969101	A910969	2010	1	1	2	A910	2	53	#NULL!	3	3	2	3	3494.34	3108.36	3341.38	#NULL!	3273.98	3012.21	#NULL!	3496.81	#NULL!	#NULL!	501	501	1	2	8	2	8	8	2	8	2	3	1	1	2	8	8	8	8	1	1	1	1	0	0	2
A910969102	A910969	2010	1	1	2	A910	2	25	#NULL!	2	3	4	1	3494.34	6744.18	#NULL!	#NULL!	6312.51	5228.16	#NULL!	#NULL!	#NULL!	#NULL!	501	501	1	2	8	8	8	8	2	8	1	8	1	1	2	8	8	8	8	1	1	1	1	0	0	2
A910969103	A910969	2010	1	1	2	A910	1	22	#NULL!	3	3	3	6	3494.34	6646.61	#NULL!	18964.4	14511.2	15152.7	#NULL!	#NULL!	27592.3	#NULL!	501	501	1	2	8	8	8	8	1	1	1	8	1	1	2	8	8	8	8	1	1	1	1	0	1	2
A910970201	A910970	2010	1	1	2	A910	1	57	#NULL!	4	4	4	1	3494.34	3506.1	4490.04	#NULL!	3939.91	3718.93	#NULL!	5036.66	#NULL!	#NULL!	501	501	1	2	8	2	8	8	2	8	2	3	2	8	2	8	8	8	8	1	1	1	1	0	0	2
A910970202	A910970	2010	1	1	2	A910	2	54	#NULL!	4	4	4	7	3494.34	3108.36	3341.38	#NULL!	3273.98	3012.21	#NULL!	3496.81	#NULL!	#NULL!	501	501	1	1	2	2	8	8	2	8	1	8	2	8	2	8	8	8	8	1	1	1	1	0	0	2
A910970501	A910970	2010	1	1	2	A910	1	63	#NULL!	3	3	3	5	3494.34	2528.49	6636.75	#NULL!	2396.08	2536.2	#NULL!	7226.89	#NULL!	#NULL!	501	501	1	2	8	2	8	8	2	8	2	3	2	8	2	8	8	8	8	1	1	1	1	0	0	2
A910970502	A910970	2010	1	1	2	A910	2	59	#NULL!	3	3	2	3	3494.34	3139.28	#NULL!	#NULL!	3004.24	2326.83	#NULL!	#NULL!	#NULL!	#NULL!	501	501	1	2	8	2	8	8	2	8	1	8	2	8	2	8	8	8	8	1	1	1	1	0	0	2
A910970503	A910970	2010	1	1	2	A910	1	29	#NULL!	3	3	4	6	3494.34	7462.73	#NULL!	17055.6	8732.22	9539.59	#NULL!	#NULL!	21004	#NULL!	501	501	1	1	2	8	8	8	2	8	1	8	2	8	1	2	2	2	2	2	2	1	1	0	0	2
A910971201	A910971	2010	1	1	2	A910	1	66	#NULL!	4	4	4	5	3494.34	4057.59	5409.58	#NULL!	4423.36	3852.59	#NULL!	6052.93	#NULL!	#NULL!	501	501	1	2	8	2	8	8	2	8	1	8	2	8	2	8	8	8	8	1	1	1	1	0	0	2
A910971401	A910971	2010	1	1	2	A910	1	35	#NULL!	4	4	4	3	3494.34	5108.22	#NULL!	18151.4	6211.71	6880.18	#NULL!	#NULL!	24503.5	#NULL!	501	501	1	2	8	8	8	8	2	8	1	8	2	8	1	1	2	1	2	2	2	2	2	1	0	1
A910971402	A910971	2010	1	1	2	A910	1	66	#NULL!	4	4	4	4	3494.34	2028.8	2704.79	#NULL!	2211.68	1926.3	#NULL!	3026.47	#NULL!	#NULL!	501	501	1	2	8	2	8	8	2	8	2	3	2	8	2	8	8	8	8	1	1	1	1	0	0	2
A910971403	A910971	2010	1	1	2	A910	2	61	#NULL!	4	4	3	7	3494.34	2368.31	2547.23	#NULL!	2367.72	2145.41	#NULL!	2666.1	#NULL!	#NULL!	501	501	1	2	8	2	8	8	2	8	1	8	2	8	2	8	8	8	8	1	1	1	1	0	0	2
A910972201	A910972	2010	1	1	2	A910	1	68	#NULL!	2	1	4	7	3494.34	2028.8	5409.58	#NULL!	2211.68	1926.3	#NULL!	6052.93	#NULL!	#NULL!	501	501	1	2	8	2	8	8	2	8	2	3	1	2	2	8	8	8	8	1	1	1	1	0	0	2
A910972202	A910972	2010	1	1	2	A910	2	62	#NULL!	1	1	4	7	3494.34	2368.31	#NULL!	#NULL!	2367.72	2145.41	#NULL!	#NULL!	#NULL!	#NULL!	501	501	1	2	8	2	8	8	2	8	1	8	2	8	2	8	8	8	8	1	1	1	1	0	0	2
A910972501	A910972	2010	1	1	2	A910	1	64	#NULL!	3	3	4	1	3494.34	2528.49	#NULL!	#NULL!	2396.08	2536.2	#NULL!	#NULL!	#NULL!	#NULL!	501	501	1	2	8	2	8	8	2	8	1	8	2	8	2	8	8	8	8	1	1	1	1	0	0	2
A910972502	A910972	2010	1	1	2	A910	2	58	#NULL!	3	3	4	7	3494.34	3139.28	5177.03	7804.98	3004.24	2326.83	11807.8	5398.43	8258.25	12722.5	501	501	1	2	8	2	8	8	2	8	1	8	2	8	2	8	8	8	8	1	1	1	1	0	0	2
A910973101	A910973	2010	1	1	2	A910	1	41	#NULL!	4	4	4	2	3494.34	4914.87	5207.96	7120.9	#NULL!	#NULL!	10613.5	#NULL!	#NULL!	#NULL!	501	501	1	2	8	1	2	2	2	8	1	8	2	8	2	8	8	8	8	1	1	1	1	0	0	2
A910973102	A910973	2010	1	1	2	A910	2	34	#NULL!	4	4	4	7	3494.34	4358.82	#NULL!	7713.73	7870.74	5582.49	#NULL!	#NULL!	15342.4	#NULL!	501	501	1	2	8	8	8	8	2	8	1	8	2	8	1	1	1	1	2	1	1	1	1	0	0	2
A910973103	A910973	2010	1	1	2	A910	1	7	#NULL!	4	4	1	#NULL!	3494.34	2604.12	#NULL!	#NULL!	2695.11	3541.17	#NULL!	#NULL!	#NULL!	#NULL!	501	501	1	1	9	8	8	8	8	8	8	8	8	8	2	8	8	8	8	1	1	1	1	0	#NULL!	8
A910973104	A910973	2010	1	1	2	A910	2	5	63	4	4	1	#NULL!	3494.34	2352.75	#NULL!	#NULL!	2386.73	3579.65	#NULL!	#NULL!	#NULL!	#NULL!	501	501	1	2	8	8	8	8	8	8	8	8	8	8	8	8	8	8	8	8	8	8	8	#NULL!	#NULL!	8
A910976202	A910976	2010	1	1	2	A910	2	54	#NULL!	4	4	3	7	3494.34	12433.4	#NULL!	#NULL!	3273.98	12048.8	#NULL!	#NULL!	#NULL!	#NULL!	501	501	1	1	2	2	8	8	1	1	1	8	1	1	1	1	2	2	2	1	1	1	1	0	1	2
A910977401	A910977	2010	1	1	2	A910	1	61	#NULL!	4	4	3	1	3494.34	2528.49	3318.38	7405.84	2396.08	2536.2	13820.1	3613.44	8209.97	14205	501	501	1	2	8	2	8	8	2	8	1	8	2	8	2	8	8	8	8	1	1	1	1	0	0	2
A910977402	A910977	2010	1	1	2	A910	2	58	#NULL!	4	4	1	7	3494.34	3139.28	2588.52	#NULL!	3004.24	2326.83	#NULL!	2699.21	#NULL!	#NULL!	501	501	1	2	8	2	8	8	2	8	2	3	2	8	2	8	8	8	8	1	1	1	1	0	0	2
A910978101	A910978	2010	1	1	2	A910	1	82	#NULL!	2	1	1	7	3494.34	3049	#NULL!	#NULL!	2401.65	3768.48	#NULL!	#NULL!	#NULL!	#NULL!	501	501	1	2	8	2	8	8	2	8	2	3	1	2	2	8	8	8	8	1	1	1	1	0	0	2
A910978102	A910978	2010	1	1	2	A910	2	74	#NULL!	2	1	1	7	3494.34	3423.75	#NULL!	#NULL!	1966.3	3275	#NULL!	#NULL!	#NULL!	#NULL!	501	501	1	2	8	2	8	8	2	8	1	8	1	1	2	8	8	8	8	1	1	1	1	0	0	2
A910978106	A910978	2010	1	1	2	A910	1	11	#NULL!	1	1	1	#NULL!	3494.34	3879.96	#NULL!	14387.3	3505.06	5481.45	#NULL!	#NULL!	19272.5	#NULL!	501	501	1	1	2	8	8	8	8	8	8	8	8	8	2	8	8	8	8	1	1	1	1	0	#NULL!	8
A910979001	A910979	2010	1	1	2	A910	1	57	#NULL!	1	2	4	1	3494.34	5843.5	6735.06	#NULL!	4924.89	6198.22	#NULL!	7554.99	#NULL!	#NULL!	501	501	1	2	8	2	8	8	2	8	1	8	2	8	2	8	8	8	8	1	1	1	1	0	0	2
A910979002	A910979	2010	1	1	2	A910	2	54	#NULL!	1	2	2	7	3494.34	5180.59	5012.07	32085.1	4092.48	5020.35	28223	5245.21	36066.8	31956.2	501	501	1	2	8	2	8	8	1	2	1	8	2	8	2	8	8	8	8	1	1	1	1	0	1	2
A910979005	A910979	2010	1	1	2	A910	2	85	#NULL!	3	2	1	7	3494.34	4211.28	#NULL!	#NULL!	3178.48	4654.13	#NULL!	#NULL!	#NULL!	#NULL!	501	501	1	2	8	2	8	8	2	8	2	3	1	1	2	8	8	8	8	1	1	1	1	0	0	2
A911967701	A911967	2010	1	1	2	A911	1	53	#NULL!	3	4	3	2	2655.7	4923.64	4782.71	#NULL!	5664.56	5024.28	#NULL!	5975.02	#NULL!	#NULL!	501	501	1	2	8	2	8	8	2	8	2	3	2	8	2	8	8	8	8	1	1	1	1	0	0	2
A911967702	A911967	2010	1	1	2	A911	2	46	#NULL!	3	4	3	7	2655.7	3772.04	3873.92	#NULL!	4016.42	3015.79	#NULL!	4122.43	#NULL!	#NULL!	501	501	1	2	8	2	8	8	2	8	1	8	2	8	2	8	8	8	8	1	1	1	1	0	0	2
A911967703	A911967	2010	1	1	2	A911	2	24	#NULL!	4	4	3	7	2655.7	3349.57	#NULL!	#NULL!	4269.25	4776.41	#NULL!	#NULL!	#NULL!	#NULL!	501	501	1	2	8	8	8	8	1	2	1	8	2	8	2	8	8	8	8	1	1	1	1	0	1	1
A911967704	A911967	2010	1	1	2	A911	1	22	#NULL!	4	4	3	7	2655.7	5317.29	#NULL!	20228.7	11608.9	12122.2	#NULL!	#NULL!	29431.8	#NULL!	501	501	1	1	2	8	8	8	2	8	1	8	2	8	1	1	2	1	2	1	1	1	1	0	0	1
A911967901	A911967	2010	1	1	2	A911	1	68	#NULL!	2	2	3	5	2655.7	1623.04	2163.83	#NULL!	1769.34	1541.04	#NULL!	2421.17	#NULL!	#NULL!	501	501	1	2	8	2	8	8	2	8	2	3	1	1	2	8	8	8	8	1	1	1	1	0	0	2
A911967902	A911967	2010	1	1	2	A911	2	59	#NULL!	1	2	1	7	2655.7	2511.42	2070.81	#NULL!	2403.39	1861.46	#NULL!	2159.37	#NULL!	#NULL!	501	501	1	2	8	2	8	8	2	8	1	8	2	8	2	8	8	8	8	1	2	1	2	1	0	2
A911968101	A911968	2010	1	1	2	A911	1	32	#NULL!	4	4	4	1	2655.7	4972.84	#NULL!	#NULL!	8147.69	7091.33	#NULL!	#NULL!	#NULL!	#NULL!	501	501	1	2	8	8	8	8	2	8	1	8	2	8	2	8	8	8	8	1	1	1	1	0	0	2
A911968102	A911968	2010	1	1	2	A911	2	32	#NULL!	4	4	4	2	2655.7	3487.05	#NULL!	18512.9	3148.3	3349.5	#NULL!	#NULL!	18410.9	#NULL!	501	501	1	2	8	8	8	8	2	8	1	8	2	8	2	8	8	8	8	1	1	1	1	0	0	2
A911968104	A911968	2010	1	1	2	A911	2	63	#NULL!	4	4	3	7	2655.7	1894.65	#NULL!	#NULL!	1894.17	1716.32	#NULL!	#NULL!	#NULL!	#NULL!	501	501	1	2	8	2	8	8	2	8	2	3	1	1	2	8	8	8	8	1	1	1	1	0	0	2
A911968601	A911968	2010	1	1	2	A911	1	47	#NULL!	3	3	4	2	2655.7	6280.42	5062.11	#NULL!	7542.09	6266.4	#NULL!	6709.06	#NULL!	#NULL!	501	501	1	2	8	2	8	8	2	8	1	8	2	8	1	1	1	1	2	1	2	1	1	0	0	1
A911968602	A911968	2010	1	1	2	A911	2	44	#NULL!	3	3	4	7	2655.7	3653.8	4650.4	23074.4	3643.34	3403.66	20778.8	4325.12	12390.5	21512.9	501	501	1	2	8	1	3	2	2	8	1	8	1	1	1	1	1	1	2	1	1	1	1	0	0	2
A911968603	A911968	2010	1	1	2	A911	1	19	#NULL!	3	3	3	1	2655.7	3561.73	#NULL!	#NULL!	3862.34	5251.91	#NULL!	#NULL!	#NULL!	#NULL!	501	501	1	1	9	8	8	8	2	8	2	3	2	8	1	1	2	1	2	1	1	1	1	0	0	2
A911968604	A911968	2010	1	1	2	A911	2	13	#NULL!	3	3	1	#NULL!	2655.7	2758.61	#NULL!	4860.89	2713.25	2675.53	#NULL!	#NULL!	5492.88	#NULL!	501	501	1	2	8	8	8	8	8	8	1	8	2	8	2	8	8	8	8	1	1	1	1	0	#NULL!	2
A911968901	A911968	2010	1	1	2	A911	1	75	#NULL!	3	1	2	7	2655.7	1626.13	5112.27	#NULL!	1921.32	1808.87	#NULL!	5404.7	#NULL!	#NULL!	501	501	1	2	8	2	8	8	2	8	1	8	2	8	2	8	8	8	8	1	1	1	1	0	0	2
A911968902	A911968	2010	1	1	2	A911	2	72	#NULL!	3	1	1	7	2655.7	1826	2969.38	88238.1	1573.04	1572	200102	3197.66	98288.8	220225	501	501	1	2	8	2	8	8	2	8	1	8	2	8	2	8	8	8	8	1	1	1	1	0	0	2
A911969301	A911969	2010	1	1	2	A911	1	40	#NULL!	3	3	4	1	2655.7	3931.9	4166.37	#NULL!	4138.94	5404.34	#NULL!	5266.16	#NULL!	#NULL!	501	501	1	2	8	2	8	8	2	8	1	8	2	8	2	8	8	8	8	1	1	1	1	0	0	2
A911969302	A911969	2010	1	1	2	A911	2	37	#NULL!	3	3	4	1	2655.7	2844.9	#NULL!	#NULL!	2923.9	2888.7	#NULL!	#NULL!	#NULL!	#NULL!	501	501	1	2	8	8	8	8	2	8	1	8	2	8	2	8	8	8	8	1	1	1	1	0	0	2
A911969303	A911969	2010	1	1	2	A911	1	6	75	3	3	1	#NULL!	2655.7	2083.29	#NULL!	#NULL!	2156.09	2124.7	#NULL!	#NULL!	#NULL!	#NULL!	501	501	1	2	8	8	8	8	8	8	8	8	8	8	1	1	1	1	2	1	1	1	1	0	#NULL!	8
A911969304	A911969	2010	1	1	2	A911	2	2	34	3	3	1	#NULL!	2655.7	2383.39	#NULL!	#NULL!	2451.1	1971.08	#NULL!	#NULL!	#NULL!	#NULL!	501	501	1	8	8	8	8	8	8	8	8	8	8	8	8	8	8	8	8	8	8	8	8	#NULL!	#NULL!	8
A911970301	A911970	2010	1	1	2	A911	1	58	#NULL!	3	3	#NULL!	#NULL!	2655.7	2804.88	#NULL!	#NULL!	3151.93	2975.15	#NULL!	#NULL!	#NULL!	#NULL!	501	501	1	2	8	2	8	8	2	8	1	8	2	8	1	1	1	1	2	1	1	1	1	0	0	2
A911970302	A911970	2010	1	1	2	A911	2	55	#NULL!	3	3	1	7	2655.7	2511.42	4141.62	#NULL!	2403.39	1861.46	#NULL!	4318.74	#NULL!	#NULL!	501	501	1	2	8	2	8	8	2	8	1	8	2	8	2	8	8	8	8	1	1	1	1	0	0	2
A911970303	A911970	2010	1	1	2	A911	1	29	#NULL!	3	3	4	3	2655.7	5970.19	#NULL!	18192.7	6985.77	7631.67	#NULL!	#NULL!	22404.3	#NULL!	501	501	1	1	2	8	8	8	2	8	1	8	2	8	1	1	2	1	2	1	1	1	1	0	0	2
A911970304	A911970	2010	1	1	2	A911	1	27	#NULL!	3	3	3	6	2655.7	5970.19	#NULL!	#NULL!	6985.77	7631.67	#NULL!	#NULL!	#NULL!	#NULL!	501	501	1	2	8	8	8	8	2	8	1	8	2	8	2	8	8	8	8	1	1	1	1	0	0	1
A911970701	A911970	2010	1	1	2	A911	1	34	#NULL!	2	3	4	1	2655.7	4972.84	#NULL!	20647.1	8147.69	7091.33	#NULL!	#NULL!	32139.5	#NULL!	501	501	1	1	2	8	8	8	2	8	1	8	2	8	1	1	2	1	2	1	2	1	1	0	0	2
A911970702	A911970	2010	1	1	2	A911	2	30	#NULL!	2	3	4	1	2655.7	3487.05	#NULL!	#NULL!	3148.3	3349.5	#NULL!	#NULL!	#NULL!	#NULL!	501	501	1	2	8	8	8	8	2	8	1	8	2	8	2	8	8	8	8	1	1	1	1	0	0	2
A911970704	A911970	2010	1	1	2	A911	2	67	#NULL!	4	3	1	7	2655.7	1386.51	1990.2	#NULL!	1426.78	1526.55	#NULL!	2062.11	#NULL!	#NULL!	501	501	1	2	8	2	8	8	2	8	2	3	2	8	2	8	8	8	8	1	1	1	1	0	0	2
A911971502	A911971	2010	1	1	2	A911	2	49	#NULL!	3	3	3	3	2655.7	7544.08	7747.83	#NULL!	8032.83	12063.1	#NULL!	8244.85	#NULL!	#NULL!	501	501	1	2	8	2	8	8	2	8	1	8	2	8	2	8	8	8	8	1	1	1	1	0	0	2
A911971503	A911971	2010	1	1	2	A911	2	19	#NULL!	3	3	3	7	2655.7	11764	#NULL!	#NULL!	#NULL!	#NULL!	#NULL!	#NULL!	#NULL!	#NULL!	501	501	1	2	8	8	8	8	2	8	1	8	2	8	2	8	8	8	8	1	1	1	1	0	0	1
A911972001	A911972	2010	1	1	2	A911	1	42	#NULL!	1	2	4	3	2655.7	3931.9	4166.37	#NULL!	4138.94	5404.34	#NULL!	5266.16	#NULL!	#NULL!	501	501	1	1	1	2	8	8	2	8	1	8	2	8	1	1	2	1	2	2	1	1	1	0	0	2
A911972002	A911972	2010	1	1	2	A911	2	41	#NULL!	1	2	4	7	2655.7	3653.8	4650.4	#NULL!	3643.34	3403.66	#NULL!	4325.12	#NULL!	#NULL!	501	501	1	2	8	2	8	8	2	8	1	8	2	8	1	1	2	1	2	1	1	1	1	0	0	2
A911972003	A911972	2010	1	1	2	A911	2	10	#NULL!	1	2	1	#NULL!	2655.7	2758.61	#NULL!	#NULL!	2713.25	2675.53	#NULL!	#NULL!	#NULL!	#NULL!	501	501	1	1	1	8	8	8	8	8	8	8	8	8	1	1	2	1	2	1	2	1	1	0	#NULL!	8
A911972004	A911972	2010	1	1	2	A911	2	5	67	1	2	1	#NULL!	2655.7	1882.2	#NULL!	#NULL!	1909.38	2147.79	#NULL!	#NULL!	#NULL!	#NULL!	501	501	1	2	8	8	8	8	8	8	8	8	8	8	8	8	8	8	8	8	8	8	8	#NULL!	#NULL!	8
A911972101	A911972	2010	1	1	2	A911	1	43	#NULL!	3	4	3	5	2655.7	3931.9	4166.37	11393.4	4138.94	5404.34	8490.82	5266.16	10245.1	11798.3	501	501	1	2	8	2	8	8	2	8	1	8	2	8	2	8	8	8	8	1	1	1	1	0	0	2
A911972102	A911972	2010	1	1	2	A911	2	39	#NULL!	3	4	3	7	2655.7	2844.9	#NULL!	#NULL!	2923.9	2888.7	#NULL!	#NULL!	#NULL!	#NULL!	501	501	1	2	8	8	8	8	2	8	1	8	2	8	2	8	8	8	8	1	1	1	1	0	0	2
A911972103	A911972	2010	1	1	2	A911	2	14	#NULL!	4	4	1	#NULL!	2655.7	2758.61	#NULL!	4860.89	2713.25	2675.53	#NULL!	#NULL!	4119.66	#NULL!	501	501	1	2	8	8	8	8	8	8	1	8	2	8	2	8	8	8	8	1	1	1	1	0	#NULL!	2
A911972104	A911972	2010	1	1	2	A911	1	8	#NULL!	4	4	1	#NULL!	2655.7	2083.29	#NULL!	#NULL!	2156.09	2124.7	#NULL!	#NULL!	#NULL!	#NULL!	501	501	1	2	8	8	8	8	8	8	8	8	8	8	1	1	2	1	2	1	1	1	1	0	#NULL!	8
A911972901	A911972	2010	1	1	2	A911	1	42	#NULL!	4	4	4	1	2655.7	3931.9	4166.37	17090.2	4138.94	5404.34	16981.6	5266.16	20490.2	23596.5	501	501	1	1	9	1	1	2	1	2	1	8	1	1	1	2	2	2	1	2	2	1	1	0	1	2
A911972902	A911972	2010	1	1	2	A911	2	39	#NULL!	4	4	3	2	2655.7	2844.9	#NULL!	#NULL!	2923.9	2888.7	#NULL!	#NULL!	#NULL!	#NULL!	501	501	1	2	8	8	8	8	2	8	1	8	2	8	1	1	1	1	2	1	1	1	1	0	0	2
A911972903	A911972	2010	1	1	2	A911	1	4	51	4	4	1	#NULL!	2655.7	2592.67	#NULL!	#NULL!	2655.06	2226.11	#NULL!	#NULL!	#NULL!	#NULL!	501	501	1	2	8	8	8	8	8	8	8	8	8	8	8	8	8	8	8	8	8	8	8	#NULL!	#NULL!	8
A911972904	A911972	2010	1	1	2	A911	2	69	#NULL!	4	4	1	7	2655.7	1386.51	1990.2	#NULL!	1426.78	1526.55	#NULL!	2062.11	#NULL!	#NULL!	501	501	1	2	8	2	8	8	2	8	1	8	2	8	2	8	8	8	8	1	1	1	1	0	0	2
A911973101	A911973	2010	1	1	2	A911	1	53	#NULL!	1	2	4	1	2655.7	4923.64	4782.71	#NULL!	5664.56	5024.28	#NULL!	5975.02	#NULL!	#NULL!	501	501	1	2	8	2	8	8	2	8	1	8	2	8	2	8	8	8	8	1	1	1	1	0	0	2
A911973102	A911973	2010	1	1	2	A911	2	55	#NULL!	2	2	3	7	2655.7	2511.42	2070.81	9365.98	2403.39	1861.46	9446.25	2159.37	13213.2	10178	501	501	1	2	8	2	8	8	2	8	1	8	2	8	2	8	8	8	8	1	1	1	1	0	0	2
A911973103	A911973	2010	1	1	2	A911	2	20	#NULL!	2	2	3	5	2655.7	3349.57	#NULL!	#NULL!	4269.25	4776.41	#NULL!	#NULL!	#NULL!	#NULL!	501	501	1	1	2	8	8	8	2	8	1	8	2	8	1	1	2	1	2	1	1	1	1	0	0	2
A911973104	A911973	2010	1	1	2	A911	1	15	#NULL!	2	2	2	7	2655.7	3561.73	#NULL!	#NULL!	3862.34	5251.91	#NULL!	#NULL!	#NULL!	#NULL!	501	501	1	1	2	8	8	8	8	8	1	8	2	8	1	1	2	1	2	1	2	1	1	0	#NULL!	2
A911973901	A911973	2010	1	1	2	A911	1	55	#NULL!	4	4	3	5	2655.7	5609.76	#NULL!	5943.65	#NULL!	#NULL!	#NULL!	#NULL!	#NULL!	#NULL!	501	501	1	2	8	2	8	8	2	8	2	3	1	2	2	8	8	8	8	1	1	1	1	0	0	2
A911973904	A911973	2010	1	1	2	A911	1	25	#NULL!	4	4	4	7	2655.7	11940.4	#NULL!	9096.34	13971.5	21975.3	#NULL!	#NULL!	22404.3	#NULL!	501	501	1	1	2	8	8	8	2	8	1	8	2	8	2	8	8	8	8	1	1	1	1	0	0	1
A911974901	A911974	2010	1	1	2	A911	1	51	#NULL!	3	3	3	1	2655.7	6564.86	4782.71	#NULL!	5664.56	6699.04	#NULL!	5975.02	#NULL!	#NULL!	501	501	1	2	8	2	8	8	2	8	1	8	2	8	1	1	2	2	1	2	1	1	1	0	0	2
A911974902	A911974	2010	1	1	2	A911	2	50	#NULL!	3	3	2	7	2655.7	3315.58	2673.1	#NULL!	2619.19	3213.03	#NULL!	2797.44	#NULL!	#NULL!	501	501	1	2	8	2	8	8	2	8	1	8	2	8	2	8	8	8	8	1	1	1	2	1	0	2
A911974903	A911974	2010	1	1	2	A911	1	22	#NULL!	3	3	3	7	2655.7	7089.72	#NULL!	#NULL!	11608.9	16162.9	#NULL!	#NULL!	#NULL!	#NULL!	501	501	1	2	8	8	8	8	1	1	1	8	2	8	2	8	8	8	8	1	1	1	1	0	1	1
A911976202	A911976	2010	1	1	2	A911	2	45	#NULL!	3	4	3	7	2655.7	7544.08	7747.83	9789.58	#NULL!	#NULL!	15397.2	#NULL!	#NULL!	#NULL!	501	501	1	2	8	1	3	2	2	8	1	8	2	8	1	1	1	1	2	1	1	1	1	0	0	1
A911976203	A911976	2010	1	1	2	A911	1	15	#NULL!	4	4	1	7	2655.7	3561.73	#NULL!	7470.37	#NULL!	#NULL!	#NULL!	#NULL!	#NULL!	#NULL!	501	501	1	2	8	8	8	8	8	8	1	8	2	8	2	8	8	8	8	1	1	1	1	0	#NULL!	1
A911977901	A911977	2010	1	1	2	A911	1	46	#NULL!	3	3	3	3	2655.7	6280.42	5062.11	#NULL!	7542.09	6266.4	#NULL!	6709.06	#NULL!	#NULL!	501	501	1	1	1	2	8	8	2	8	1	8	2	8	1	1	2	1	2	2	1	1	1	0	0	2
A911977902	A911977	2010	1	1	2	A911	2	41	#NULL!	3	3	3	7	2655.7	3653.8	4650.4	#NULL!	3643.34	3403.66	#NULL!	4325.12	#NULL!	#NULL!	501	501	1	1	9	2	8	8	2	8	1	8	2	8	1	1	1	1	2	1	1	1	1	0	0	2
A911977903	A911977	2010	1	1	2	A911	1	9	#NULL!	3	3	1	#NULL!	2655.7	2083.29	#NULL!	#NULL!	2156.09	2124.7	#NULL!	#NULL!	#NULL!	#NULL!	501	501	1	1	9	8	8	8	8	8	8	8	8	8	2	8	8	8	8	1	1	1	1	0	#NULL!	8
A911978102	A911978	2010	1	1	2	A911	1	14	#NULL!	1	1	1	#NULL!	2655.7	3103.97	#NULL!	#NULL!	4206.08	3946.65	#NULL!	#NULL!	#NULL!	#NULL!	501	501	1	1	9	8	8	8	8	8	1	8	1	1	1	2	2	2	2	1	2	1	1	0	#NULL!	3
A911978103	A911978	2010	1	1	2	A911	2	71	#NULL!	3	1	3	3	2655.7	3652	5938.75	#NULL!	2359.56	2358	#NULL!	6395.33	#NULL!	#NULL!	501	501	1	2	8	2	8	8	2	8	1	8	2	8	2	8	8	8	8	1	1	1	1	0	0	2
A911979201	A911979	2010	1	1	2	A911	1	63	#NULL!	4	4	3	#NULL!	2655.7	2022.79	2654.7	2962.34	1916.86	2028.96	5528.05	2890.76	3283.99	5681.98	501	501	1	2	8	2	8	8	2	8	1	8	2	8	2	8	8	8	8	1	1	1	1	0	0	2
A911979501	A911979	2010	1	1	2	A911	1	56	#NULL!	2	2	2	7	2655.7	2804.88	#NULL!	#NULL!	4202.57	3966.86	#NULL!	#NULL!	#NULL!	#NULL!	501	501	1	2	8	2	8	8	2	8	1	8	2	8	2	8	8	8	8	1	1	1	2	1	0	2
A911979502	A911979	2010	1	1	2	A911	2	51	#NULL!	2	2	3	7	2655.7	2486.69	5346.21	#NULL!	3492.25	3213.03	#NULL!	5594.89	#NULL!	#NULL!	501	501	1	2	8	2	8	8	2	8	1	8	2	8	2	8	8	8	8	1	1	1	1	0	0	2
A911979503	A911979	2010	1	1	2	A911	1	30	#NULL!	2	2	3	3	2655.7	4972.84	#NULL!	#NULL!	#NULL!	#NULL!	#NULL!	#NULL!	#NULL!	#NULL!	501	501	1	2	8	8	8	8	2	8	1	8	2	8	2	8	8	8	8	1	1	1	1	0	0	2
A911979504	A911979	2010	1	1	2	A911	2	28	#NULL!	1	2	4	3	2655.7	5395.34	#NULL!	13889.8	6733.35	5576.7	#NULL!	#NULL!	15535.4	#NULL!	501	501	1	2	8	8	8	8	2	8	1	8	2	8	2	8	8	8	8	1	1	1	1	0	0	1
A912968201	A912968	2010	1	1	1	A912	1	56	#NULL!	3	3	2	5	9888.6	7310.85	9362.54	#NULL!	#NULL!	#NULL!	#NULL!	#NULL!	#NULL!	#NULL!	512	517	1	2	8	2	8	8	2	8	2	3	1	1	2	8	8	8	8	1	1	1	1	0	0	2
A912968202	A912968	2010	1	1	1	A912	2	52	#NULL!	3	3	1	7	9888.6	6481.49	6967.39	20071	#NULL!	#NULL!	39233.4	#NULL!	#NULL!	#NULL!	512	517	1	2	8	2	8	8	2	8	1	8	2	8	2	8	8	8	8	1	1	1	1	0	0	2
A912968203	A912968	2010	1	1	1	A912	1	27	#NULL!	3	3	4	1	9888.6	15561.2	#NULL!	17782.1	#NULL!	#NULL!	#NULL!	#NULL!	#NULL!	#NULL!	512	517	1	1	2	8	8	8	2	8	1	8	2	8	2	8	8	8	8	1	1	1	1	0	0	2
A912968701	A912968	2010	1	1	1	A912	2	68	#NULL!	3	2	1	7	9888.6	3613.92	#NULL!	#NULL!	3718.86	3978.92	#NULL!	#NULL!	#NULL!	#NULL!	512	517	1	2	8	1	2	2	2	8	2	3	1	1	2	8	8	8	8	1	1	1	1	0	0	2
A912968702	A912968	2010	1	1	1	A912	1	52	#NULL!	1	2	1	5	9888.6	12833.4	#NULL!	#NULL!	14764.5	13095.7	#NULL!	#NULL!	#NULL!	#NULL!	512	517	1	2	8	2	8	8	2	8	1	8	2	8	2	8	8	8	8	1	1	1	1	0	0	2
A912969201	A912969	2010	1	1	1	A912	2	42	#NULL!	1	1	2	5	9888.6	9523.55	#NULL!	20047.7	9496.29	8871.57	#NULL!	#NULL!	16147.7	#NULL!	512	517	1	2	8	2	8	8	2	8	1	8	2	8	2	8	8	8	8	1	1	1	1	0	0	2
A912969202	A912969	2010	1	1	1	A912	1	9	#NULL!	1	1	1	#NULL!	9888.6	5430.06	#NULL!	#NULL!	5619.79	5537.99	#NULL!	#NULL!	#NULL!	#NULL!	512	517	1	2	8	8	8	8	8	8	8	8	8	8	2	8	8	8	8	1	1	1	1	0	#NULL!	8
A912969203	A912969	2010	1	1	1	A912	1	7	#NULL!	1	1	1	#NULL!	9888.6	5430.06	#NULL!	#NULL!	5619.79	5537.99	#NULL!	#NULL!	#NULL!	#NULL!	512	517	1	2	8	8	8	8	8	8	8	8	8	8	1	1	2	1	1	1	1	1	1	0	#NULL!	8
A912969601	A912969	2010	1	1	1	A912	1	37	#NULL!	3	4	4	7	9888.6	15893.3	#NULL!	#NULL!	12952.5	18699.5	#NULL!	#NULL!	#NULL!	#NULL!	512	517	1	2	8	8	8	8	2	8	1	8	2	8	2	8	8	8	8	1	1	1	1	0	0	2
A912970301	A912970	2010	1	1	1	A912	1	67	#NULL!	2	2	1	6	9888.6	4230.41	5639.98	15840.7	9223.5	8033.36	24734	12621.5	17280.9	28729.8	512	517	1	2	8	2	8	8	2	8	1	8	2	8	2	8	8	8	8	1	1	1	1	0	0	2
A912970302	A912970	2010	1	1	1	A912	2	63	#NULL!	2	2	1	7	9888.6	4938.36	5311.44	#NULL!	#NULL!	#NULL!	#NULL!	#NULL!	#NULL!	#NULL!	512	517	1	2	8	2	8	8	2	8	2	3	1	2	2	8	8	8	8	1	1	1	1	0	0	2
A912970701	A912970	2010	1	1	1	A912	1	79	#NULL!	3	2	4	7	9888.6	4238.47	#NULL!	#NULL!	5007.88	4714.77	#NULL!	#NULL!	#NULL!	#NULL!	512	517	1	2	8	2	8	8	2	8	3	3	2	8	2	8	8	8	8	1	1	1	1	0	0	2
A912970702	A912970	2010	1	1	1	A912	2	78	#NULL!	3	2	2	7	9888.6	5268.77	#NULL!	#NULL!	5302.16	5822.82	#NULL!	#NULL!	#NULL!	#NULL!	512	517	1	2	8	2	8	8	1	2	1	8	2	8	1	2	2	2	1	1	1	1	1	0	1	2
A912972001	A912972	2010	1	1	1	A912	1	40	#NULL!	1	2	4	2	9888.6	10248.4	10859.5	#NULL!	10788.1	14086.3	#NULL!	13726.1	#NULL!	#NULL!	512	517	1	2	8	2	8	8	2	8	1	8	2	8	2	8	8	8	8	1	1	1	1	0	0	2
A912972002	A912972	2010	1	1	1	A912	2	37	#NULL!	1	2	3	7	9888.6	7415.17	#NULL!	#NULL!	7621.07	7529.33	#NULL!	#NULL!	#NULL!	#NULL!	512	517	1	2	8	8	8	8	2	8	1	8	1	1	2	8	8	8	8	1	1	1	1	0	0	2
A912972003	A912972	2010	1	1	1	A912	1	14	#NULL!	1	2	1	#NULL!	9888.6	8090.41	#NULL!	15000	7308.69	6857.89	#NULL!	#NULL!	24112	#NULL!	512	517	1	2	8	8	8	8	8	8	1	8	1	1	2	8	8	8	8	1	1	1	1	0	#NULL!	1
A912972004	A912972	2010	1	1	1	A912	1	9	#NULL!	1	2	1	#NULL!	9888.6	5430.06	#NULL!	#NULL!	5619.79	5537.99	#NULL!	#NULL!	#NULL!	#NULL!	512	517	1	2	8	8	8	8	8	8	8	8	8	8	2	8	8	8	8	1	1	1	1	0	#NULL!	8
A912972005	A912972	2010	1	1	1	A912	1	8	#NULL!	1	2	1	#NULL!	9888.6	5430.06	#NULL!	#NULL!	5619.79	5537.99	#NULL!	#NULL!	#NULL!	#NULL!	512	517	1	2	8	8	8	8	8	8	8	8	8	8	2	8	8	8	8	1	1	1	1	0	#NULL!	8
A912972101	A912972	2010	1	1	1	A912	2	48	#NULL!	1	2	3	6	9888.6	9831.73	10097.3	#NULL!	17236	15721.2	#NULL!	21490	#NULL!	#NULL!	512	517	1	1	2	2	8	8	1	2	1	8	2	8	1	1	2	1	2	1	1	1	1	0	1	1
A912972102	A912972	2010	1	1	1	A912	1	20	#NULL!	2	2	3	6	9888.6	13859.4	#NULL!	26362.8	#NULL!	#NULL!	#NULL!	#NULL!	#NULL!	#NULL!	512	517	1	2	8	8	8	8	1	1	1	8	1	1	2	8	8	8	8	1	1	1	1	0	1	2
A912972103	A912972	2010	1	1	1	A912	2	19	#NULL!	2	2	3	3	9888.6	15331.3	#NULL!	#NULL!	16960	19689.4	#NULL!	#NULL!	#NULL!	#NULL!	512	517	1	2	8	8	8	8	2	8	1	8	2	8	1	2	1	1	2	1	1	1	1	0	0	2
A912972104	A912972	2010	1	1	1	A912	1	48	#NULL!	1	2	4	5	9888.6	15869.9	13194.3	32861.1	#NULL!	#NULL!	40781.4	#NULL!	#NULL!	#NULL!	512	517	1	2	8	2	8	8	2	8	1	8	2	8	2	8	8	8	8	1	1	1	1	0	0	2
A912973301	A912973	2010	1	1	1	A912	1	47	#NULL!	1	2	3	2	9888.6	15869.9	13194.3	#NULL!	17353	20473.5	#NULL!	17487	#NULL!	#NULL!	512	517	1	2	8	2	8	8	2	8	1	8	2	8	2	8	8	8	8	1	1	1	1	0	0	2
A912973302	A912973	2010	1	1	1	A912	1	21	#NULL!	1	2	3	3	9888.6	13859.4	#NULL!	26362.8	#NULL!	#NULL!	#NULL!	#NULL!	#NULL!	#NULL!	512	517	1	1	1	8	8	8	2	8	1	8	2	8	1	1	2	2	1	1	1	1	1	0	0	1
A912973303	A912973	2010	1	1	1	A912	1	18	#NULL!	1	2	3	7	9888.6	9283.57	#NULL!	#NULL!	15100.7	18252	#NULL!	#NULL!	#NULL!	#NULL!	512	517	1	2	8	8	8	8	8	8	1	8	2	8	2	8	8	8	8	1	1	1	1	0	#NULL!	1
A912973304	A912973	2010	1	1	1	A912	2	10	#NULL!	1	2	1	#NULL!	9888.6	7190.26	#NULL!	25339.6	7072.01	9298.28	#NULL!	#NULL!	28634.1	#NULL!	512	517	1	2	8	8	8	8	8	8	8	8	8	8	2	8	8	8	8	1	1	1	1	0	#NULL!	8
A912973501	A912973	2010	1	1	1	A912	1	44	#NULL!	1	1	4	3	9888.6	10248.4	21719.1	#NULL!	14384.1	17607.9	#NULL!	26911.9	#NULL!	#NULL!	512	517	1	2	8	2	8	8	2	8	2	3	2	8	1	1	2	1	2	1	1	1	1	0	0	2
A912973502	A912973	2010	1	1	1	A912	2	39	#NULL!	1	1	4	7	9888.6	7415.17	#NULL!	19202.1	10161.4	9411.67	#NULL!	#NULL!	46749.8	#NULL!	512	517	1	2	8	8	8	8	2	8	1	8	2	8	1	1	1	1	2	1	1	1	1	0	0	2
A912973503	A912973	2010	1	1	1	A912	2	12	#NULL!	1	1	1	#NULL!	9888.6	7190.26	#NULL!	#NULL!	9429.35	8717.14	#NULL!	#NULL!	#NULL!	#NULL!	512	517	1	2	8	8	8	8	8	8	1	8	2	8	1	1	1	1	2	1	1	1	1	0	#NULL!	2
A912973504	A912973	2010	1	1	1	A912	2	9	#NULL!	1	1	1	#NULL!	9888.6	4905.91	#NULL!	#NULL!	4976.77	6997.7	#NULL!	#NULL!	#NULL!	#NULL!	512	517	1	9	9	8	8	8	8	8	8	8	8	8	9	9	9	9	9	9	9	9	9	#NULL!	#NULL!	8
A912973602	A912973	2010	1	1	1	A912	2	34	#NULL!	4	4	4	7	9888.6	15709.3	#NULL!	32169	16411.9	11640.5	#NULL!	#NULL!	31991.8	#NULL!	512	517	1	2	8	8	8	8	2	8	1	8	1	1	1	1	1	1	2	1	1	1	1	0	0	2
A912973603	A912973	2010	1	1	1	A912	1	6	78	4	4	1	#NULL!	9888.6	5430.06	#NULL!	#NULL!	5619.79	7383.98	#NULL!	#NULL!	#NULL!	#NULL!	512	517	1	1	1	8	8	8	8	8	8	8	8	8	1	2	2	2	1	2	2	1	2	1	#NULL!	8
A912973604	A912973	2010	1	1	1	A912	2	4	59	4	4	1	#NULL!	9888.6	6212.24	#NULL!	#NULL!	6388.74	6850.1	#NULL!	#NULL!	#NULL!	#NULL!	512	517	1	2	8	8	8	8	8	8	8	8	8	8	8	8	8	8	8	8	8	8	8	#NULL!	#NULL!	8
A912976102	A912976	2010	1	1	1	A912	2	38	#NULL!	1	2	3	7	9888.6	14830.3	#NULL!	#NULL!	7621.07	10039.1	#NULL!	#NULL!	#NULL!	#NULL!	512	517	1	2	8	8	8	8	2	8	1	8	2	8	2	8	8	8	8	1	1	1	1	0	0	2
A912976103	A912976	2010	1	1	1	A912	2	8	#NULL!	1	2	1	#NULL!	9888.6	4905.91	#NULL!	#NULL!	4976.77	7464.21	#NULL!	#NULL!	#NULL!	#NULL!	512	517	1	2	8	8	8	8	8	8	8	8	8	8	2	8	8	8	8	1	1	1	1	0	#NULL!	8
A912976104	A912976	2010	1	1	1	A912	2	5	71	1	2	1	#NULL!	9888.6	4905.91	#NULL!	#NULL!	4976.77	7464.21	#NULL!	#NULL!	#NULL!	#NULL!	512	517	1	2	8	8	8	8	8	8	8	8	8	8	8	8	8	8	8	8	8	8	8	#NULL!	#NULL!	8
A912978202	A912978	2010	1	1	1	A912	2	76	#NULL!	2	1	1	7	9888.6	10537.5	29099.5	#NULL!	5302.16	11645.6	#NULL!	30733.9	#NULL!	#NULL!	512	517	1	2	8	2	8	8	1	2	1	8	1	1	2	8	8	8	8	1	1	1	1	0	1	2
A912978601	A912978	2010	1	1	1	A912	1	52	#NULL!	1	1	1	7	9888.6	12833.4	12466	14437.4	#NULL!	#NULL!	20676.1	#NULL!	#NULL!	#NULL!	512	517	1	2	8	1	3	2	2	8	2	3	2	8	1	2	1	1	2	1	1	1	1	0	0	2
A912978602	A912978	2010	1	1	1	A912	2	22	#NULL!	1	1	3	7	9888.6	8730.59	#NULL!	9334.58	#NULL!	#NULL!	#NULL!	#NULL!	#NULL!	#NULL!	512	517	1	1	2	8	8	8	2	8	1	8	1	1	2	8	8	8	8	1	1	1	1	0	0	1
A913971801	A913971	2010	1	1	1	A913	1	42	#NULL!	1	2	2	6	6665.73	6908.26	#NULL!	#NULL!	7272.04	9495.32	#NULL!	#NULL!	#NULL!	#NULL!	512	517	1	2	8	2	8	8	2	8	1	8	2	8	2	8	8	8	8	1	1	1	1	0	0	2
A913971802	A913971	2010	1	1	1	A913	2	43	#NULL!	1	2	2	5	6665.73	6419.65	16341.3	#NULL!	6401.28	5980.17	#NULL!	15198.3	#NULL!	#NULL!	512	517	1	2	8	2	8	8	2	8	1	8	2	8	1	1	1	1	1	1	1	1	1	0	0	2
A913971803	A913971	2010	1	1	1	A913	1	15	#NULL!	1	2	1	7	6665.73	6257.89	#NULL!	#NULL!	6786.06	9227.5	#NULL!	#NULL!	#NULL!	#NULL!	512	517	1	2	8	8	8	8	8	8	1	8	2	8	2	8	8	8	8	1	1	1	1	0	#NULL!	2
A913971804	A913971	2010	1	1	1	A913	1	14	#NULL!	1	2	1	#NULL!	6665.73	5453.61	#NULL!	#NULL!	4926.66	4622.79	#NULL!	#NULL!	#NULL!	#NULL!	512	517	1	2	8	8	8	8	8	8	1	8	2	8	2	8	8	8	8	1	1	1	1	0	#NULL!	2
A913972101	A913972	2010	1	1	1	A913	2	44	#NULL!	1	1	4	2	6665.73	6419.65	8170.67	#NULL!	6401.28	5980.17	#NULL!	7599.15	#NULL!	#NULL!	512	517	1	2	8	1	3	2	2	8	1	8	1	1	2	8	8	8	8	1	1	1	1	0	0	2
A913972102	A913972	2010	1	1	1	A913	2	13	#NULL!	1	1	1	#NULL!	6665.73	4846.82	#NULL!	#NULL!	4767.12	4700.85	#NULL!	#NULL!	#NULL!	#NULL!	512	517	1	2	8	8	8	8	8	8	1	8	2	8	2	8	8	8	8	1	1	1	1	0	#NULL!	2
A913972103	A913972	2010	1	1	1	A913	1	9	#NULL!	1	1	1	#NULL!	6665.73	3660.31	#NULL!	#NULL!	3788.2	3733.06	#NULL!	#NULL!	#NULL!	#NULL!	512	517	1	9	9	8	8	8	8	8	8	8	8	8	2	8	8	8	8	1	1	1	1	0	#NULL!	8
A913972501	A913972	2010	1	1	1	A913	1	72	#NULL!	4	3	3	2	6665.73	2547.55	#NULL!	#NULL!	#NULL!	#NULL!	#NULL!	#NULL!	#NULL!	#NULL!	512	517	1	2	8	2	8	8	1	2	1	8	2	8	1	2	1	1	2	1	1	1	1	0	1	2
A913972502	A913972	2010	1	1	1	A913	2	67	#NULL!	4	3	4	7	6665.73	2436.08	#NULL!	#NULL!	3342.42	3576.16	#NULL!	#NULL!	#NULL!	#NULL!	512	517	1	2	8	2	8	8	2	8	1	8	2	8	2	8	8	8	8	1	1	1	1	0	0	2
A913972503	A913972	2010	1	1	1	A913	2	42	#NULL!	3	3	4	7	6665.73	6419.65	#NULL!	#NULL!	8535.04	7973.56	#NULL!	#NULL!	#NULL!	#NULL!	512	517	1	2	8	2	8	8	2	8	1	8	1	1	1	1	2	2	2	2	2	1	1	0	0	2
A913972504	A913972	2010	1	1	1	A913	1	33	#NULL!	3	3	4	3	6665.73	8737.17	#NULL!	48368.8	18156.7	16612.4	#NULL!	#NULL!	68003.4	#NULL!	512	517	1	2	8	8	8	8	2	8	1	8	1	1	1	1	2	1	2	1	1	1	1	0	0	2
A913972901	A913972	2010	1	1	1	A913	2	71	#NULL!	4	3	1	7	6665.73	3208.25	5217.13	#NULL!	2763.8	2761.98	#NULL!	5618.23	#NULL!	#NULL!	512	517	1	2	8	1	3	2	2	8	1	8	2	8	2	8	8	8	8	1	1	1	1	0	0	2
A913972902	A913972	2010	1	1	1	A913	2	38	#NULL!	2	3	4	1	6665.73	4998.44	#NULL!	17258.4	5137.23	5075.39	#NULL!	#NULL!	15756.6	#NULL!	512	517	1	2	8	8	8	8	2	8	1	8	1	1	1	1	1	1	2	1	1	1	1	0	0	2
A913973401	A913973	2010	1	1	1	A913	1	47	#NULL!	2	2	3	6	6665.73	11034.6	8894.02	33226.6	#NULL!	#NULL!	27490	#NULL!	#NULL!	#NULL!	512	517	1	2	8	2	8	8	2	8	1	8	2	8	2	8	8	8	8	1	1	1	1	0	0	2
A913973402	A913973	2010	1	1	1	A913	2	44	#NULL!	2	2	4	3	6665.73	6419.65	8170.67	#NULL!	8535.04	7973.56	#NULL!	15198.3	#NULL!	#NULL!	512	517	1	2	8	2	8	8	2	8	1	8	2	8	2	8	8	8	8	1	1	1	1	0	0	2
A913973403	A913973	2010	1	1	1	A913	2	19	#NULL!	2	2	3	3	6665.73	10334.6	#NULL!	#NULL!	12680	9925.3	#NULL!	#NULL!	#NULL!	#NULL!	512	517	1	2	8	8	8	8	2	8	1	8	1	1	2	8	8	8	8	1	1	1	1	0	0	2
A913973404	A913973	2010	1	1	1	A913	1	17	#NULL!	2	2	2	7	6665.73	6257.89	#NULL!	13125.3	9048.08	12303.3	#NULL!	#NULL!	38729.9	#NULL!	512	517	1	2	8	8	8	8	8	8	1	8	2	8	1	2	1	1	2	1	1	1	1	0	#NULL!	2
A913973601	A913973	2010	1	1	1	A913	1	54	#NULL!	1	2	3	5	6665.73	11534.3	8403.13	#NULL!	13270	11770.1	#NULL!	10498	#NULL!	#NULL!	512	517	1	2	8	2	8	8	2	8	1	8	2	8	2	8	8	8	8	1	1	1	1	0	0	2
A913973602	A913973	2010	1	1	1	A913	2	52	#NULL!	1	2	1	3	6665.73	5825.41	4696.59	36078.6	6135.81	5645.22	26446.6	4915.05	40555.9	29944.8	512	517	1	2	8	2	8	8	2	8	1	8	2	8	1	1	2	2	2	1	1	1	1	0	0	2
A913973603	A913973	2010	1	1	1	A913	1	27	#NULL!	1	2	3	2	6665.73	13986	#NULL!	#NULL!	16365.2	17878.3	#NULL!	#NULL!	#NULL!	#NULL!	512	517	1	1	1	8	8	8	2	8	1	8	2	8	1	2	1	1	1	1	1	1	1	0	0	2
A913974201	A913974	2010	1	1	1	A913	1	58	#NULL!	3	3	2	3	6665.73	4928.12	6311.13	10442.9	5537.87	5227.27	16208	7079.45	11174.6	18625.8	512	517	1	2	8	2	8	8	2	8	1	8	2	8	2	8	8	8	8	1	1	1	1	0	0	2
A913974202	A913974	2010	1	1	1	A913	2	66	#NULL!	4	3	1	3	6665.73	2436.08	3496.74	#NULL!	2506.82	2682.12	#NULL!	3623.09	#NULL!	#NULL!	512	517	1	2	8	2	8	8	1	2	1	8	2	8	1	1	1	1	2	1	1	1	1	0	1	2
A913975001	A913975	2010	1	1	1	A913	1	77	#NULL!	3	2	4	7	6665.73	2857.08	#NULL!	#NULL!	3375.73	3178.15	#NULL!	#NULL!	#NULL!	#NULL!	512	517	1	2	8	2	8	8	1	1	2	3	2	8	2	8	8	8	8	1	1	1	1	0	1	2
A913975902	A913975	2010	1	1	1	A913	2	65	#NULL!	2	1	3	6	6665.73	7308.23	10490.2	14393.5	2506.82	8046.36	23015	10869.3	14261.4	23538.4	512	517	1	2	8	1	3	2	2	8	1	8	2	8	2	8	8	8	8	1	1	1	1	0	0	2
A913976401	A913976	2010	1	1	1	A913	1	64	#NULL!	4	4	4	7	6665.73	4442.5	13992.8	#NULL!	4209.87	5941.4	#NULL!	15237	#NULL!	#NULL!	512	517	1	2	8	2	8	8	2	8	2	3	2	8	2	8	8	8	8	1	1	1	1	0	0	2
A913976403	A913976	2010	1	1	1	A913	1	29	#NULL!	4	4	4	7	6665.73	13111.9	#NULL!	19977.6	#NULL!	#NULL!	#NULL!	#NULL!	#NULL!	#NULL!	512	517	1	2	8	8	8	8	2	8	1	8	2	8	2	8	8	8	8	1	1	1	1	0	0	2
A913976404	A913976	2010	1	1	1	A913	2	28	#NULL!	4	4	4	2	6665.73	11849.4	#NULL!	15252.5	11091	12247.7	#NULL!	#NULL!	34119.3	#NULL!	512	517	1	2	8	8	8	8	2	8	1	8	2	8	2	8	8	8	8	1	1	1	1	0	0	2
A913976405	A913976	2010	1	1	1	A913	2	86	#NULL!	4	4	1	7	6665.73	4439.48	#NULL!	#NULL!	4467.62	6541.77	#NULL!	#NULL!	#NULL!	#NULL!	512	517	1	9	9	2	8	8	2	8	1	8	2	8	2	8	8	8	8	1	1	1	1	0	0	2
A913977501	A913977	2010	1	1	1	A913	1	51	#NULL!	3	3	3	5	6665.73	8650.74	8403.13	#NULL!	9952.52	8827.56	#NULL!	10498	#NULL!	#NULL!	512	517	1	2	8	2	8	8	2	8	1	8	1	1	2	8	8	8	8	1	1	1	1	0	0	2
A913977503	A913977	2010	1	1	1	A913	1	23	#NULL!	3	3	3	7	6665.73	9342.37	#NULL!	13328	19634.5	21298.4	#NULL!	#NULL!	25855.5	#NULL!	512	517	1	2	8	8	8	8	2	8	1	8	2	8	2	8	8	8	8	1	1	1	1	0	0	2
A913977504	A913977	2010	1	1	1	A913	2	11	#NULL!	3	3	1	#NULL!	6665.73	4846.82	#NULL!	#NULL!	4767.12	4700.85	#NULL!	#NULL!	#NULL!	#NULL!	512	517	1	2	8	8	8	8	8	8	8	8	8	8	2	8	8	8	8	1	1	1	1	0	#NULL!	8
A913978601	A913978	2010	1	1	1	A913	2	41	#NULL!	1	2	3	3	6665.73	6419.65	8170.67	#NULL!	6401.28	5980.17	#NULL!	7599.15	#NULL!	#NULL!	512	517	1	2	8	1	3	2	2	8	1	8	1	1	2	8	8	8	8	1	1	1	1	0	0	2
A913978602	A913978	2010	1	1	1	A913	1	15	#NULL!	1	2	2	7	6665.73	6257.89	#NULL!	13125.3	6786.06	9227.5	#NULL!	#NULL!	14523.7	#NULL!	512	517	1	2	8	8	8	8	8	8	1	8	2	8	2	8	8	8	8	1	1	1	1	0	#NULL!	2
A913978603	A913978	2010	1	1	1	A913	2	14	#NULL!	1	2	1	#NULL!	6665.73	4846.82	#NULL!	8540.49	4767.12	4700.85	#NULL!	#NULL!	7238.16	#NULL!	512	517	1	2	8	8	8	8	8	8	1	8	1	1	1	1	1	1	2	1	1	1	1	0	#NULL!	1
A913978801	A913978	2010	1	1	1	A913	1	69	#NULL!	2	1	4	1	6665.73	2851.65	3801.81	10677.9	3108.7	2707.57	16672.8	4253.95	11648.8	19366.2	512	517	1	2	8	1	3	2	2	8	1	8	2	8	2	8	8	8	8	1	1	1	1	0	0	2
A913978802	A913978	2010	1	1	1	A913	2	53	#NULL!	1	1	3	7	6665.73	4369.06	4696.59	#NULL!	4601.86	4233.92	#NULL!	4915.05	#NULL!	#NULL!	512	517	1	1	2	2	8	8	2	8	1	8	2	8	1	1	2	1	1	1	1	1	1	0	0	2
A913979501	A913979	2010	1	1	1	A913	1	65	#NULL!	3	2	2	6	6665.73	2851.65	3801.81	#NULL!	3108.7	2707.57	#NULL!	4253.95	#NULL!	#NULL!	512	517	1	2	8	1	1	2	2	8	1	8	2	8	2	8	8	8	8	1	1	1	1	0	0	2
A913979502	A913979	2010	1	1	1	A913	2	58	#NULL!	1	2	1	7	6665.73	4412.52	3638.38	10970.6	4222.71	3270.55	16596.9	3793.97	11607.7	17882.5	512	517	1	2	8	1	3	2	2	8	1	8	2	8	2	8	8	8	8	1	1	1	1	0	0	2
A914967401	A914967	2010	1	1	2	A914	2	75	#NULL!	3	2	1	7	2970.19	4295.5	19628	#NULL!	4322.73	4747.21	#NULL!	20052.4	#NULL!	#NULL!	501	501	1	2	8	2	8	8	2	8	1	8	1	2	2	8	8	8	8	1	1	1	1	0	0	2
A914967801	A914967	2010	1	1	2	A914	1	38	#NULL!	4	4	4	3	2970.19	4341.98	#NULL!	#NULL!	5279.95	5848.15	#NULL!	#NULL!	#NULL!	#NULL!	501	501	1	2	8	8	8	8	2	8	1	8	2	8	1	2	1	1	2	1	2	1	1	0	0	2
A914967802	A914967	2010	1	1	2	A914	2	32	#NULL!	4	4	4	3	2970.19	3704.99	#NULL!	13113.3	3345.07	3558.84	#NULL!	#NULL!	13041.1	#NULL!	501	501	1	2	8	8	8	8	2	8	1	8	2	8	2	8	8	8	8	1	1	1	1	0	0	2
A914967803	A914967	2010	1	1	2	A914	2	6	81	4	4	1	#NULL!	2970.19	1999.84	#NULL!	#NULL!	2028.72	2282.02	#NULL!	#NULL!	#NULL!	#NULL!	501	501	1	2	8	8	8	8	8	8	8	8	8	8	1	2	1	1	2	1	2	1	1	0	#NULL!	8
A914968301	A914968	2010	1	1	2	A914	1	67	#NULL!	3	2	3	3	2970.19	1724.48	2299.07	6457.28	1879.93	1637.35	10082.5	2572.5	7044.38	11711.4	501	501	1	2	8	2	8	8	2	8	1	8	2	8	2	8	8	8	8	1	1	1	1	0	0	2
A914968302	A914968	2010	1	1	2	A914	2	62	#NULL!	3	2	3	3	2970.19	2013.06	2165.15	#NULL!	2012.56	1823.59	#NULL!	2266.19	#NULL!	#NULL!	501	501	1	2	8	2	8	8	2	8	1	8	2	8	2	8	8	8	8	1	1	1	1	0	0	2
A914968601	A914968	2010	1	1	2	A914	1	44	#NULL!	3	4	3	3	2970.19	4177.64	4426.77	#NULL!	4397.62	5742.11	#NULL!	5595.29	#NULL!	#NULL!	501	501	1	2	8	2	8	8	2	8	1	8	1	1	2	8	8	8	8	1	1	1	1	0	0	2
A914968602	A914968	2010	1	1	2	A914	2	38	#NULL!	3	4	4	7	2970.19	3022.71	#NULL!	#NULL!	3106.64	3069.25	#NULL!	#NULL!	#NULL!	#NULL!	501	501	1	1	1	8	8	8	2	8	1	8	2	8	1	1	2	2	1	1	1	1	1	0	0	2
A914968603	A914968	2010	1	1	2	A914	1	7	#NULL!	4	4	1	#NULL!	2970.19	2213.5	#NULL!	#NULL!	2290.84	2257.5	#NULL!	#NULL!	#NULL!	#NULL!	501	501	1	1	2	8	8	8	8	8	8	8	8	8	1	2	1	1	1	1	1	1	1	0	#NULL!	8
A914968604	A914968	2010	1	1	2	A914	2	7	#NULL!	3	4	1	#NULL!	2970.19	1999.84	#NULL!	#NULL!	2028.72	2282.02	#NULL!	#NULL!	#NULL!	#NULL!	501	501	1	1	2	8	8	8	8	8	8	8	8	8	2	8	8	8	8	1	1	1	1	0	#NULL!	8
A914969101	A914969	2010	1	1	2	A914	1	44	#NULL!	#NULL!	#NULL!	4	3	2970.19	4177.64	4426.77	12105.5	4397.62	5742.11	18043	5595.29	29027.8	25071.3	501	501	1	2	8	1	3	2	2	8	1	8	2	8	1	2	1	1	2	1	1	2	1	0	0	2
A914969102	A914969	2010	1	1	2	A914	2	40	#NULL!	#NULL!	#NULL!	4	1	2970.19	3882.16	4941.05	#NULL!	3871.05	3616.39	#NULL!	4595.44	#NULL!	#NULL!	501	501	1	2	8	2	8	8	2	8	1	8	2	8	1	2	2	1	2	1	1	1	1	0	0	2
A914969103	A914969	2010	1	1	2	A914	1	12	#NULL!	#NULL!	#NULL!	1	#NULL!	2970.19	3297.96	#NULL!	#NULL!	2979.3	2795.54	#NULL!	#NULL!	#NULL!	#NULL!	501	501	1	2	8	8	8	8	8	8	1	8	2	8	1	1	1	1	2	1	1	1	1	0	#NULL!	1
A914969104	A914969	2010	1	1	2	A914	1	11	#NULL!	#NULL!	#NULL!	1	#NULL!	2970.19	3297.96	#NULL!	#NULL!	2979.3	2795.54	#NULL!	#NULL!	#NULL!	#NULL!	501	501	1	2	8	8	8	8	8	8	8	8	8	8	1	1	2	1	2	1	1	1	1	0	#NULL!	8
A914969105	A914969	2010	1	1	2	A914	1	2	31	#NULL!	#NULL!	1	#NULL!	2970.19	2754.71	#NULL!	#NULL!	2821	2365.24	#NULL!	#NULL!	#NULL!	#NULL!	501	501	1	8	8	8	8	8	8	8	8	8	8	8	8	8	8	8	8	8	8	8	8	#NULL!	#NULL!	8
A914969801	A914969	2010	1	1	2	A914	1	52	#NULL!	4	4	3	3	2970.19	5231.37	5081.63	#NULL!	8024.79	7117.73	#NULL!	6348.46	#NULL!	#NULL!	501	501	1	1	2	2	8	8	2	8	1	8	2	8	1	2	1	1	2	1	1	1	1	0	0	2
A914969802	A914969	2010	1	1	2	A914	2	47	#NULL!	4	4	4	3	2970.19	4007.79	4116.04	#NULL!	5689.92	4272.36	#NULL!	4380.08	#NULL!	#NULL!	501	501	1	1	2	2	8	8	2	8	1	8	2	8	1	2	2	1	2	1	1	1	1	0	0	2
A914969803	A914969	2010	1	1	2	A914	1	18	#NULL!	4	4	3	7	2970.19	3784.34	#NULL!	15874.5	#NULL!	#NULL!	#NULL!	#NULL!	#NULL!	#NULL!	501	501	1	2	8	8	8	8	8	8	1	8	1	1	2	8	8	8	8	1	1	1	1	0	#NULL!	1
A914969804	A914969	2010	1	1	2	A914	1	17	#NULL!	4	4	2	7	2970.19	3784.34	#NULL!	#NULL!	5471.65	7440.2	#NULL!	#NULL!	#NULL!	#NULL!	501	501	1	2	8	8	8	8	8	8	1	8	2	8	1	2	1	1	2	1	1	1	1	0	#NULL!	1
A914970101	A914970	2010	1	1	2	A914	1	81	#NULL!	1	1	1	7	2970.19	1727.76	#NULL!	#NULL!	2041.41	1921.92	#NULL!	#NULL!	#NULL!	#NULL!	501	501	1	2	8	2	8	8	2	8	1	8	2	8	2	8	8	8	8	1	1	1	1	0	0	2
A914970102	A914970	2010	1	1	2	A914	2	83	#NULL!	1	1	1	7	2970.19	2147.75	#NULL!	#NULL!	2161.36	2373.61	#NULL!	#NULL!	#NULL!	#NULL!	501	501	1	2	8	2	8	8	2	8	1	8	1	1	2	8	8	8	8	1	1	1	2	1	0	2
A914970801	A914970	2010	1	1	2	A914	1	38	#NULL!	2	3	3	2	2970.19	4341.98	#NULL!	#NULL!	7919.93	7310.19	#NULL!	#NULL!	#NULL!	#NULL!	501	501	1	2	8	8	8	8	2	8	1	8	2	8	2	8	8	8	8	1	1	1	1	0	0	2
A914970802	A914970	2010	1	1	2	A914	2	34	#NULL!	3	3	3	3	2970.19	3704.99	#NULL!	#NULL!	#NULL!	#NULL!	#NULL!	#NULL!	#NULL!	#NULL!	501	501	1	2	8	8	8	8	2	8	1	8	2	8	2	8	8	8	8	1	1	1	1	0	0	2
A914970803	A914970	2010	1	1	2	A914	2	12	#NULL!	3	3	1	#NULL!	2970.19	2931.02	#NULL!	#NULL!	4324.24	3553.44	#NULL!	#NULL!	#NULL!	#NULL!	501	501	1	2	8	8	8	8	8	8	1	8	2	8	1	2	1	1	2	1	1	1	1	0	#NULL!	2
A914970804	A914970	2010	1	1	2	A914	2	11	#NULL!	3	3	1	#NULL!	2970.19	2931.02	#NULL!	#NULL!	2882.82	3553.44	#NULL!	#NULL!	#NULL!	#NULL!	501	501	1	2	8	8	8	8	8	8	8	8	8	8	2	8	8	8	8	1	1	1	1	0	#NULL!	8
A914970805	A914970	2010	1	1	2	A914	1	4	55	3	3	1	#NULL!	2970.19	2754.71	#NULL!	#NULL!	2821	2956.55	#NULL!	#NULL!	#NULL!	#NULL!	501	501	1	2	8	8	8	8	8	8	8	8	8	8	8	8	8	8	8	8	8	8	8	#NULL!	#NULL!	8
A914971001	A914971	2010	1	1	2	A914	1	37	#NULL!	4	4	4	2	2970.19	4341.98	#NULL!	10285.8	5279.95	5848.15	#NULL!	#NULL!	13885.3	#NULL!	501	501	1	2	8	8	8	8	2	8	1	8	2	8	1	1	1	1	2	1	2	1	1	0	0	2
A914971002	A914971	2010	1	1	2	A914	2	34	#NULL!	4	4	4	7	2970.19	3704.99	#NULL!	#NULL!	3345.07	3558.84	#NULL!	#NULL!	#NULL!	#NULL!	501	501	1	1	1	8	8	8	1	2	1	8	2	8	1	2	2	2	1	2	2	1	1	0	1	2
A914971003	A914971	2010	1	1	2	A914	2	7	#NULL!	3	4	1	#NULL!	2970.19	1999.84	#NULL!	#NULL!	2028.72	2282.02	#NULL!	#NULL!	#NULL!	#NULL!	501	501	1	2	8	8	8	8	8	8	8	8	8	8	1	1	1	1	2	1	1	1	1	0	#NULL!	8
A914971004	A914971	2010	1	1	2	A914	1	1	23	4	4	1	#NULL!	2970.19	2754.71	#NULL!	#NULL!	2821	2365.24	#NULL!	#NULL!	#NULL!	#NULL!	501	501	1	8	8	8	8	8	8	8	8	8	8	8	8	8	8	8	8	8	8	8	8	#NULL!	#NULL!	8
A914971801	A914971	2010	1	1	2	A914	1	47	#NULL!	1	2	4	6	2970.19	6672.94	5378.49	#NULL!	8013.47	6658.06	#NULL!	7128.37	#NULL!	#NULL!	501	501	1	2	8	2	8	8	2	8	1	8	1	1	1	2	2	2	2	2	1	1	1	0	0	2
A914971802	A914971	2010	1	1	2	A914	2	75	#NULL!	3	2	3	7	2970.19	2147.75	9814.02	#NULL!	2161.36	2373.61	#NULL!	10026.2	#NULL!	#NULL!	501	501	1	2	8	2	8	8	2	8	1	8	2	8	2	8	8	8	8	1	1	1	1	0	0	2
A914972901	A914972	2010	1	1	2	A914	2	43	#NULL!	1	2	4	7	2970.19	3882.16	#NULL!	#NULL!	3871.05	3616.39	#NULL!	#NULL!	#NULL!	#NULL!	501	501	1	2	8	2	8	8	2	8	1	8	2	8	1	1	2	2	2	1	1	1	1	0	0	2
A914972902	A914972	2010	1	1	2	A914	2	16	#NULL!	1	2	2	7	2970.19	6249.64	#NULL!	5166.34	5751	4501.6	#NULL!	#NULL!	7613.84	#NULL!	501	501	1	2	8	8	8	8	8	8	1	8	2	8	2	8	8	8	8	1	1	1	1	0	#NULL!	2
A914973301	A914973	2010	1	1	2	A914	1	58	#NULL!	2	2	3	3	2970.19	3973.58	#NULL!	#NULL!	4465.23	6322.19	#NULL!	#NULL!	#NULL!	#NULL!	501	501	1	2	8	2	8	8	2	8	1	8	2	8	2	8	8	8	8	1	1	1	1	0	0	2
A914973302	A914973	2010	1	1	2	A914	2	52	#NULL!	2	2	2	3	2970.19	3522.8	5680.35	21817.9	#NULL!	#NULL!	15993.1	#NULL!	#NULL!	#NULL!	501	501	1	2	8	2	8	8	2	8	1	8	2	8	2	8	8	8	8	1	1	1	1	0	0	2
A914973303	A914973	2010	1	1	2	A914	1	31	#NULL!	2	2	3	3	2970.19	7044.85	#NULL!	#NULL!	11542.6	15069.1	#NULL!	#NULL!	#NULL!	#NULL!	501	501	1	2	8	8	8	8	2	8	1	8	2	8	2	8	8	8	8	1	1	1	1	0	0	2
A914974501	A914974	2010	1	1	2	A914	1	46	#NULL!	4	4	3	3	2970.19	6672.94	5378.49	#NULL!	8013.47	6658.06	#NULL!	7128.37	#NULL!	#NULL!	501	501	1	2	8	2	8	8	2	8	1	8	2	8	1	1	1	1	2	1	1	1	1	0	0	2
A914974502	A914974	2010	1	1	2	A914	2	47	#NULL!	4	4	3	2	2970.19	4007.79	4116.04	10401.4	4267.44	3204.27	16359.5	4380.08	9618.5	18184.4	501	501	1	2	8	2	8	8	2	8	1	8	2	8	2	8	8	8	8	1	1	1	1	0	0	2
A914974901	A914974	2010	1	1	2	A914	1	46	#NULL!	4	4	2	1	2970.19	10009.4	5378.49	#NULL!	12020.2	9987.08	#NULL!	7128.37	#NULL!	#NULL!	501	501	1	1	2	2	8	8	2	8	1	8	2	8	1	1	2	2	1	1	1	1	1	0	0	2
A914974902	A914974	2010	1	1	2	A914	2	46	#NULL!	4	4	2	7	2970.19	6011.69	4116.04	#NULL!	6401.16	4806.41	#NULL!	4380.08	#NULL!	#NULL!	501	501	1	2	8	1	1	2	2	8	1	8	2	8	2	8	8	8	8	1	1	1	1	0	0	2
A914975703	A914975	2010	1	1	2	A914	2	21	#NULL!	#NULL!	#NULL!	3	7	2970.19	7117.85	#NULL!	#NULL!	9072.15	10149.9	#NULL!	#NULL!	#NULL!	#NULL!	501	501	1	2	8	8	8	8	2	8	2	3	2	8	1	2	1	1	2	1	1	1	1	0	0	1
A914975704	A914975	2010	1	1	2	A914	2	19	#NULL!	#NULL!	#NULL!	3	3	2970.19	12499.3	#NULL!	20665.4	11502	9003.2	#NULL!	#NULL!	15227.7	#NULL!	501	501	1	2	8	8	8	8	2	8	1	8	1	1	2	8	8	8	8	1	1	1	1	0	0	2
A914976401	A914976	2010	1	1	2	A914	1	58	#NULL!	1	2	4	7	2970.19	2980.18	#NULL!	6315.12	3348.92	3161.09	#NULL!	#NULL!	6757.65	#NULL!	501	501	1	1	1	1	3	2	2	8	1	8	2	8	1	2	2	1	2	1	1	1	1	0	0	2
A914976402	A914976	2010	1	1	2	A914	2	52	#NULL!	1	2	3	7	2970.19	2642.1	#NULL!	#NULL!	2782.88	2560.38	#NULL!	#NULL!	#NULL!	#NULL!	501	501	1	2	8	2	8	8	2	8	1	8	2	8	2	8	8	8	8	1	1	1	1	0	0	2
A914977501	A914977	2010	1	1	2	A914	1	44	#NULL!	4	4	4	2	2970.19	4177.64	4426.77	#NULL!	4397.62	5742.11	#NULL!	5595.29	#NULL!	#NULL!	501	501	1	2	8	2	8	8	1	2	1	8	2	8	2	8	8	8	8	1	1	1	1	0	1	2
A914977502	A914977	2010	1	1	2	A914	2	39	#NULL!	4	4	4	7	2970.19	3022.71	#NULL!	#NULL!	3106.64	3069.25	#NULL!	#NULL!	#NULL!	#NULL!	501	501	1	2	8	8	8	8	2	8	1	8	1	2	2	8	8	8	8	1	1	1	1	0	0	2
A914977503	A914977	2010	1	1	2	A914	1	5	67	4	4	1	#NULL!	2970.19	2213.5	#NULL!	#NULL!	2290.84	2257.5	#NULL!	#NULL!	#NULL!	#NULL!	501	501	1	2	8	8	8	8	8	8	8	8	8	8	8	8	8	8	8	8	8	8	8	#NULL!	#NULL!	8
A914977504	A914977	2010	1	1	2	A914	2	2	30	4	4	1	#NULL!	2970.19	2532.35	#NULL!	#NULL!	2604.3	2094.27	#NULL!	#NULL!	#NULL!	#NULL!	501	501	1	8	8	8	8	8	8	8	8	8	8	8	8	8	8	8	8	8	8	8	8	#NULL!	#NULL!	8
A914978601	A914978	2010	1	1	2	A914	1	61	#NULL!	3	3	3	6	2970.19	3223.82	5641.24	#NULL!	2036.67	3233.66	#NULL!	6142.86	#NULL!	#NULL!	501	501	1	2	8	2	8	8	2	8	2	3	1	2	1	2	1	1	2	1	1	1	1	0	0	2
A914978602	A914978	2010	1	1	2	A914	2	58	#NULL!	3	3	2	7	2970.19	4002.58	#NULL!	#NULL!	2553.61	2966.71	#NULL!	#NULL!	#NULL!	#NULL!	501	501	1	1	2	1	3	2	2	8	1	8	2	8	1	2	1	1	2	1	2	1	1	0	0	2
A914979201	A914979	2010	1	1	2	A914	1	62	#NULL!	3	3	4	7	2970.19	2149.21	2820.62	#NULL!	2036.67	2155.77	#NULL!	3071.43	#NULL!	#NULL!	501	501	1	2	8	2	8	8	2	8	1	8	2	8	2	8	8	8	8	1	1	1	1	0	0	2
A914979202	A914979	2010	1	1	2	A914	2	57	#NULL!	3	3	3	7	2970.19	2668.39	2200.24	#NULL!	2553.61	1977.8	#NULL!	2294.33	#NULL!	#NULL!	501	501	1	1	2	2	8	8	2	8	1	8	2	8	1	1	1	1	2	1	1	1	1	0	0	2
A914979203	A914979	2010	1	1	2	A914	2	30	#NULL!	3	3	4	1	2970.19	3704.99	#NULL!	#NULL!	3345.07	3558.84	#NULL!	#NULL!	#NULL!	#NULL!	501	501	1	2	8	8	8	8	1	2	1	8	2	8	2	8	8	8	8	1	1	1	1	0	1	1
A914979204	A914979	2010	1	1	2	A914	2	25	#NULL!	3	3	4	1	2970.19	5732.55	#NULL!	14757.9	5365.64	4443.93	#NULL!	#NULL!	16506.4	#NULL!	501	501	1	1	2	8	8	8	2	8	3	3	2	8	2	8	8	8	8	1	2	1	2	1	0	2
A915968901	A915968	2010	1	1	1	A915	1	32	#NULL!	1	1	4	7	10574.8	12506.2	#NULL!	17308.4	18156.7	17833.9	#NULL!	#NULL!	26942.5	#NULL!	512	517	1	2	8	8	8	8	2	8	1	8	2	8	1	2	2	2	2	1	1	1	1	0	0	1
A915969601	A915969	2010	1	1	1	A915	2	53	#NULL!	1	1	3	6	10574.8	6253.75	6722.57	#NULL!	6586.97	6060.31	#NULL!	7035.27	#NULL!	#NULL!	512	517	1	2	8	1	3	1	1	2	2	3	2	8	1	2	1	2	1	1	2	1	1	0	1	2
A915969602	A915969	2010	1	1	1	A915	1	22	#NULL!	1	1	3	6	10574.8	13372.4	#NULL!	25436.5	19634.5	27356.3	#NULL!	#NULL!	37008.9	#NULL!	512	517	1	2	8	8	8	8	2	8	1	8	2	8	2	8	8	8	8	1	1	1	1	0	0	1
A915970101	A915970	2010	1	1	1	A915	1	48	#NULL!	1	1	1	7	10574.8	15794.6	24058.5	#NULL!	#NULL!	#NULL!	#NULL!	#NULL!	#NULL!	#NULL!	512	517	1	2	8	1	3	2	2	8	1	8	1	1	2	8	8	8	8	1	1	1	2	1	0	2
A915970102	A915970	2010	1	1	1	A915	2	53	#NULL!	1	1	1	7	10574.8	6253.75	#NULL!	25821	#NULL!	#NULL!	#NULL!	#NULL!	#NULL!	#NULL!	512	517	1	2	8	1	3	2	2	8	1	8	2	8	2	8	8	8	8	1	1	1	1	0	0	2
A915972401	A915972	2010	1	1	1	A915	1	39	#NULL!	4	4	1	3	10574.8	10277.3	#NULL!	#NULL!	12497.4	13842.3	#NULL!	#NULL!	#NULL!	#NULL!	512	517	1	2	8	8	8	8	2	8	1	8	2	8	2	8	8	8	8	1	1	1	1	0	0	2
A915972402	A915972	2010	1	1	1	A915	2	45	#NULL!	3	4	3	2	10574.8	9486.28	9742.49	24619.8	10100.9	7584.38	19361.2	10367.5	22766.6	21520.8	512	517	1	2	8	2	8	8	2	8	1	8	2	8	2	8	8	8	8	1	1	1	1	0	0	2
A915972901	A915972	2010	1	1	1	A915	1	51	#NULL!	1	2	2	3	10574.8	16105.9	12028	55505.9	17461.2	18804.1	39899.3	15026.5	64537.7	52540.4	512	517	1	2	8	2	8	8	2	8	2	3	1	1	2	8	8	8	8	1	1	1	1	0	0	2
A915972902	A915972	2010	1	1	1	A915	2	46	#NULL!	1	2	2	3	10574.8	12648.4	9742.49	#NULL!	16834.8	18284.6	#NULL!	10367.5	#NULL!	#NULL!	512	517	1	1	1	2	8	8	2	8	1	8	2	8	1	2	2	2	1	2	2	1	2	1	0	2
A915972904	A915972	2010	1	1	1	A915	2	20	#NULL!	1	2	3	7	10574.8	11231.8	#NULL!	#NULL!	#NULL!	#NULL!	#NULL!	#NULL!	#NULL!	#NULL!	512	517	1	1	1	8	8	8	2	8	2	3	2	8	1	1	1	2	1	1	1	1	1	0	0	1
A915972905	A915972	2010	1	1	1	A915	1	12	#NULL!	1	2	1	#NULL!	10574.8	7806.14	#NULL!	14473	#NULL!	#NULL!	#NULL!	#NULL!	#NULL!	#NULL!	512	517	1	2	8	8	8	8	8	8	1	8	2	8	2	8	8	8	8	1	1	1	1	0	#NULL!	2
A915973602	A915973	2010	1	1	1	A915	2	51	#NULL!	3	3	3	7	10574.8	8338.33	20167.7	#NULL!	8782.63	12120.6	#NULL!	21105.8	#NULL!	#NULL!	512	517	1	2	8	2	8	8	2	8	1	8	2	8	2	8	8	8	8	1	1	1	1	0	0	2
A915973603	A915973	2010	1	1	1	A915	1	23	#NULL!	3	3	3	2	10574.8	16377.5	#NULL!	50873	#NULL!	#NULL!	#NULL!	#NULL!	#NULL!	#NULL!	512	517	1	2	8	8	8	8	2	8	1	8	2	8	1	1	2	1	2	1	1	1	1	0	0	1
A915973604	A915973	2010	1	1	1	A915	2	83	#NULL!	4	3	1	7	10574.8	6778.19	#NULL!	#NULL!	6821.15	11236.5	#NULL!	#NULL!	#NULL!	#NULL!	512	517	1	2	8	1	3	2	2	8	1	8	1	1	1	2	1	1	2	1	1	1	1	0	0	2
A915973701	A915973	2010	1	1	1	A915	2	52	#NULL!	1	1	1	5	10574.8	6253.75	6722.57	#NULL!	6586.97	6060.31	#NULL!	7035.27	#NULL!	#NULL!	512	517	1	2	8	1	3	2	2	8	1	8	2	8	1	2	1	1	2	1	1	1	1	0	0	2
A915973703	A915973	2010	1	1	1	A915	2	27	#NULL!	1	1	4	7	10574.8	13568.7	#NULL!	17465.6	12700.2	10518.6	#NULL!	#NULL!	19535	#NULL!	512	517	1	2	8	8	8	8	2	8	1	8	2	8	2	8	8	8	8	1	1	1	1	0	0	1
A915974701	A915974	2010	1	1	1	A915	2	74	#NULL!	3	2	1	7	10574.8	9184.39	#NULL!	#NULL!	15824.1	15813.7	#NULL!	#NULL!	#NULL!	#NULL!	512	517	1	2	8	1	3	2	2	8	1	8	1	1	2	8	8	8	8	1	1	1	1	0	0	2
A915974703	A915974	2010	1	1	1	A915	1	18	#NULL!	1	2	3	7	10574.8	15995	#NULL!	#NULL!	#NULL!	#NULL!	#NULL!	#NULL!	#NULL!	#NULL!	512	517	1	2	8	8	8	8	8	8	1	8	2	8	2	8	8	8	8	1	1	1	1	0	#NULL!	2
A915976401	A915976	2010	1	1	1	A915	1	39	#NULL!	2	2	3	2	10574.8	10277.3	#NULL!	#NULL!	12497.4	13842.3	#NULL!	#NULL!	#NULL!	#NULL!	512	517	1	2	8	8	8	8	2	8	1	8	2	8	2	8	8	8	8	1	1	1	1	0	0	2
A915976402	A915976	2010	1	1	1	A915	2	37	#NULL!	2	2	3	7	10574.8	7154.63	#NULL!	37054.9	7353.29	7264.78	#NULL!	#NULL!	33830.4	#NULL!	512	517	1	2	8	8	8	8	2	8	2	3	1	1	1	1	1	1	2	1	1	1	2	1	0	2
A915976403	A915976	2010	1	1	1	A915	1	6	76	2	2	1	#NULL!	10574.8	5239.26	#NULL!	#NULL!	5422.33	5343.4	#NULL!	#NULL!	#NULL!	#NULL!	512	517	1	2	8	8	8	8	8	8	8	8	8	8	2	8	8	8	8	1	1	1	1	0	#NULL!	8
A915976404	A915976	2010	1	1	1	A915	2	2	27	2	2	1	#NULL!	10574.8	5993.96	#NULL!	#NULL!	6164.26	4957.05	#NULL!	#NULL!	#NULL!	#NULL!	512	517	1	8	8	8	8	8	8	8	8	8	8	8	8	8	8	8	8	8	8	8	8	#NULL!	#NULL!	8
A915976405	A915976	2010	1	1	1	A915	2	79	#NULL!	3	2	1	7	10574.8	5083.64	23229.4	#NULL!	5115.86	5618.23	#NULL!	23731.6	#NULL!	#NULL!	512	517	1	2	8	1	3	2	2	8	1	8	2	8	2	8	8	8	8	1	1	1	1	0	0	2
A915976601	A915976	2010	1	1	1	A915	1	42	#NULL!	1	2	3	5	10574.8	9888.3	10478	28653.3	10409	13591.3	21353.5	13243.8	34353.8	29671.4	512	517	1	2	8	2	8	8	2	8	1	8	2	8	1	2	2	1	2	2	1	1	1	0	0	2
A915976602	A915976	2010	1	1	1	A915	2	36	#NULL!	1	2	3	7	10574.8	7154.63	#NULL!	#NULL!	7353.29	7264.78	#NULL!	#NULL!	#NULL!	#NULL!	512	517	1	2	8	8	8	8	2	8	1	8	2	8	2	8	8	8	8	1	1	1	1	0	0	2
A915976603	A915976	2010	1	1	1	A915	2	9	#NULL!	1	2	1	#NULL!	10574.8	4733.53	#NULL!	#NULL!	4801.9	5401.46	#NULL!	#NULL!	#NULL!	#NULL!	512	517	1	2	8	8	8	8	8	8	8	8	8	8	2	8	8	8	8	1	1	1	1	0	#NULL!	8
A915976604	A915976	2010	1	1	1	A915	1	7	#NULL!	1	2	1	#NULL!	10574.8	5239.26	#NULL!	#NULL!	5422.33	5343.4	#NULL!	#NULL!	#NULL!	#NULL!	512	517	1	1	1	8	8	8	8	8	8	8	8	8	1	2	2	2	1	2	1	1	1	0	#NULL!	8
A915977502	A915977	2010	1	1	1	A915	2	70	#NULL!	1	1	1	7	10574.8	9184.39	#NULL!	#NULL!	7912.06	7906.83	#NULL!	#NULL!	#NULL!	#NULL!	512	517	1	2	8	1	3	2	2	8	2	3	1	1	2	8	8	8	8	1	1	1	1	0	0	2
A915979202	A915979	2010	1	1	1	A915	2	40	#NULL!	1	2	3	3	10574.8	9188.92	11695.3	19343.2	9162.62	8559.85	26128.2	10877.2	15580.4	27051.3	512	517	1	2	8	1	3	2	2	8	1	8	2	8	2	8	8	8	8	1	1	1	1	0	0	2
A915979203	A915979	2010	1	1	1	A915	2	7	#NULL!	1	2	1	#NULL!	10574.8	4733.53	#NULL!	#NULL!	4801.9	5401.46	#NULL!	#NULL!	#NULL!	#NULL!	512	517	1	2	8	8	8	8	8	8	8	8	8	8	2	8	8	8	8	1	1	1	1	0	#NULL!	8
A915979204	A915979	2010	1	1	1	A915	2	3	39	1	2	1	#NULL!	10574.8	5993.96	#NULL!	#NULL!	6164.26	4957.05	#NULL!	#NULL!	#NULL!	#NULL!	512	517	1	8	8	8	8	8	8	8	8	8	8	8	8	8	8	8	8	8	8	8	8	#NULL!	#NULL!	8
A916970501	A916970	2010	1	1	1	A916	2	63	#NULL!	1	1	4	6	5387.77	5189.11	11162.3	#NULL!	3458.54	4700.71	#NULL!	11683.2	#NULL!	#NULL!	512	517	1	2	8	2	8	8	2	8	1	8	2	8	2	8	8	8	8	2	1	1	1	0	0	2
A916970502	A916970	2010	1	1	1	A916	2	85	#NULL!	1	1	1	7	5387.77	5536.29	#NULL!	#NULL!	3714.25	6118.48	#NULL!	#NULL!	#NULL!	#NULL!	512	517	1	2	8	1	2	2	1	1	1	8	2	8	2	8	8	8	8	1	1	1	1	0	1	2
A916971201	A916971	2010	1	1	1	A916	2	62	#NULL!	1	1	1	6	5387.77	3459.4	3720.76	#NULL!	3458.54	3133.8	#NULL!	3894.39	#NULL!	#NULL!	512	517	1	2	8	2	8	8	2	8	1	8	2	8	2	8	8	8	8	1	1	1	2	1	0	2
A916971401	A916971	2010	1	1	1	A916	1	41	#NULL!	3	3	3	2	5387.77	7179.18	7607.29	20803.1	7557.21	9867.69	15503.2	9615.38	18706.4	21542.2	512	517	1	2	8	2	8	8	2	8	1	8	2	8	2	8	8	8	8	1	1	1	1	0	0	2
A916971402	A916971	2010	1	1	1	A916	2	37	#NULL!	3	3	3	7	5387.77	5194.45	#NULL!	#NULL!	5338.69	5274.43	#NULL!	#NULL!	#NULL!	#NULL!	512	517	1	2	8	8	8	8	2	8	1	8	2	8	2	8	8	8	8	1	1	1	1	0	0	2
A916971403	A916971	2010	1	1	1	A916	1	12	#NULL!	3	3	1	#NULL!	5387.77	5667.47	#NULL!	10507.8	5119.86	4804.07	#NULL!	#NULL!	8445.45	#NULL!	512	517	1	1	2	8	8	8	8	8	1	8	2	8	1	2	1	1	2	1	1	1	1	0	#NULL!	2
A916971404	A916971	2010	1	1	1	A916	2	8	#NULL!	3	3	1	#NULL!	5387.77	3436.68	#NULL!	#NULL!	3486.31	3921.6	#NULL!	#NULL!	#NULL!	#NULL!	512	517	1	2	8	8	8	8	8	8	8	8	8	8	2	8	8	8	8	1	1	1	1	0	#NULL!	8
A916971601	A916971	2010	1	1	1	A916	1	37	#NULL!	3	3	3	7	5387.77	7461.6	#NULL!	17675.9	12098	13399.9	#NULL!	#NULL!	23861.6	#NULL!	512	517	1	2	8	8	8	8	2	8	1	8	2	8	2	8	8	8	8	1	1	1	1	0	0	1
A916971602	A916971	2010	1	1	1	A916	1	61	#NULL!	3	3	4	7	5387.77	3693.37	#NULL!	10817.8	4666.62	4939.52	#NULL!	#NULL!	11992.3	#NULL!	512	517	1	2	8	2	8	8	2	8	1	8	2	8	2	8	8	8	8	1	1	1	1	0	0	2
A916971603	A916971	2010	1	1	1	A916	2	58	#NULL!	3	3	3	6	5387.77	4585.56	7562.12	#NULL!	5851.08	4531.75	#NULL!	7885.51	#NULL!	#NULL!	512	517	1	2	8	2	8	8	2	8	1	8	2	8	2	8	8	8	8	1	1	1	1	0	0	2
A916971604	A916971	2010	1	1	1	A916	1	30	#NULL!	3	3	4	1	5387.77	9079.81	#NULL!	#NULL!	#NULL!	#NULL!	#NULL!	#NULL!	#NULL!	#NULL!	512	517	1	2	8	8	8	8	2	8	1	8	2	8	1	2	1	1	1	2	2	1	1	0	0	1
A916972101	A916972	2010	1	1	1	A916	1	43	#NULL!	1	2	3	3	5387.77	7179.18	7607.29	#NULL!	7557.21	16446.1	#NULL!	9615.38	#NULL!	#NULL!	512	517	1	1	1	2	8	8	2	8	1	8	2	8	1	2	2	2	1	1	2	1	1	0	0	2
A916972102	A916972	2010	1	1	1	A916	2	41	#NULL!	1	2	3	3	5387.77	6671.41	8491.08	28087.4	6652.31	10357.8	37939.6	7897.16	28279.4	39280	512	517	1	2	8	2	8	8	2	8	1	8	2	8	2	8	8	8	8	1	1	1	1	0	0	2
A916972105	A916972	2010	1	1	1	A916	2	10	#NULL!	2	2	1	#NULL!	5387.77	5036.9	#NULL!	26626.2	4954.06	8142	#NULL!	#NULL!	12536.7	#NULL!	512	517	1	2	8	8	8	8	8	8	8	8	8	8	2	8	8	8	8	1	1	1	1	0	#NULL!	8
A916973101	A916973	2010	1	1	1	A916	1	61	#NULL!	3	3	3	6	5387.77	3693.37	4847.17	#NULL!	3499.97	3704.64	#NULL!	5278.18	#NULL!	#NULL!	512	517	1	2	8	2	8	8	2	8	1	8	1	1	2	8	8	8	8	1	1	1	1	0	0	2
A916973102	A916973	2010	1	1	1	A916	2	53	#NULL!	2	3	2	3	5387.77	4540.39	4880.77	#NULL!	4782.32	4399.95	#NULL!	5107.8	#NULL!	#NULL!	512	517	1	2	8	2	8	8	2	8	1	8	2	8	2	8	8	8	8	1	1	1	2	1	0	1
A916973103	A916973	2010	1	1	1	A916	2	28	#NULL!	2	3	4	2	5387.77	9851.25	#NULL!	#NULL!	9220.72	7636.8	#NULL!	#NULL!	#NULL!	#NULL!	512	517	1	2	8	8	8	8	2	8	1	8	2	8	2	8	8	8	8	1	1	1	1	0	0	1
A916973801	A916973	2010	1	1	1	A916	1	80	#NULL!	3	2	3	7	5387.77	3958.83	#NULL!	#NULL!	4209.73	3963.33	#NULL!	#NULL!	#NULL!	#NULL!	512	517	1	2	8	1	2	2	2	8	1	8	2	8	2	8	8	8	8	1	1	1	1	0	0	2
A916973802	A916973	2010	1	1	1	A916	2	76	#NULL!	3	2	1	7	5387.77	4921.15	#NULL!	#NULL!	4457.11	4894.78	#NULL!	#NULL!	#NULL!	#NULL!	512	517	1	2	8	2	8	8	2	8	1	8	2	8	2	8	8	8	8	1	1	1	1	0	0	2
A916973804	A916973	2010	1	1	1	A916	2	49	#NULL!	1	2	3	6	5387.77	9183.06	22651.1	#NULL!	8800.2	6607.76	#NULL!	25785.5	#NULL!	#NULL!	512	517	1	2	8	2	8	8	2	8	1	8	2	8	2	8	8	8	8	1	1	1	1	0	0	1
A916973805	A916973	2010	1	1	1	A916	1	16	#NULL!	1	2	2	7	5387.77	6503.3	#NULL!	#NULL!	8462.61	11507.2	#NULL!	#NULL!	#NULL!	#NULL!	512	517	1	2	8	8	8	8	8	8	1	8	2	8	2	8	8	8	8	1	1	1	1	0	#NULL!	1
A916973806	A916973	2010	1	1	1	A916	2	14	#NULL!	1	2	1	#NULL!	5387.77	5036.9	#NULL!	#NULL!	5944.88	5862.24	#NULL!	#NULL!	#NULL!	#NULL!	512	517	1	1	2	8	8	8	8	8	1	8	2	8	2	8	8	8	8	1	1	1	1	0	#NULL!	1
A916974201	A916974	2010	1	1	1	A916	1	56	#NULL!	1	2	1	5	5387.77	5121.38	13117.2	#NULL!	5755.05	5432.27	#NULL!	14714.2	#NULL!	#NULL!	512	517	1	2	8	2	8	8	2	8	1	8	2	8	2	8	8	8	8	1	1	1	1	0	0	2
A916974202	A916974	2010	1	1	1	A916	2	50	#NULL!	1	2	2	3	5387.77	4540.39	#NULL!	#NULL!	4782.32	4399.95	#NULL!	#NULL!	#NULL!	#NULL!	512	517	1	2	8	2	8	8	2	8	1	8	2	8	2	8	8	8	8	1	1	1	1	0	0	1
A916974203	A916974	2010	1	1	1	A916	2	28	#NULL!	1	2	3	1	5387.77	9851.25	#NULL!	12680.5	9220.72	7636.8	#NULL!	#NULL!	14182.9	#NULL!	512	517	1	2	8	8	8	8	2	8	1	8	2	8	1	1	2	1	2	1	1	1	1	0	0	1
A916974204	A916974	2010	1	1	1	A916	1	26	#NULL!	1	2	4	3	5387.77	10900.8	#NULL!	16608.8	12755.2	13934.5	#NULL!	#NULL!	20453.8	#NULL!	512	517	1	2	8	8	8	8	2	8	1	8	2	8	2	8	8	8	8	1	1	1	1	0	0	1
A916974901	A916974	2010	1	1	1	A916	1	36	#NULL!	3	3	4	2	5387.77	7461.6	#NULL!	#NULL!	9073.47	10049.9	#NULL!	#NULL!	#NULL!	#NULL!	512	517	1	2	8	8	8	8	2	8	1	8	2	8	2	8	8	8	8	1	1	1	1	0	0	2
A916974902	A916974	2010	1	1	1	A916	2	38	#NULL!	3	3	4	7	5387.77	5194.45	#NULL!	#NULL!	5338.69	5274.43	#NULL!	#NULL!	#NULL!	#NULL!	512	517	1	2	8	8	8	8	2	8	1	8	2	8	1	1	2	2	2	1	1	1	1	0	0	2
A916974903	A916974	2010	1	1	1	A916	1	7	#NULL!	3	3	1	#NULL!	5387.77	3803.85	#NULL!	#NULL!	3936.76	3879.45	#NULL!	#NULL!	#NULL!	#NULL!	512	517	1	2	8	8	8	8	8	8	8	8	8	8	2	8	8	8	8	1	1	1	1	0	#NULL!	8
A916974904	A916974	2010	1	1	1	A916	2	1	22	3	3	1	#NULL!	5387.77	4351.78	#NULL!	#NULL!	4475.42	3598.96	#NULL!	#NULL!	#NULL!	#NULL!	512	517	1	8	8	8	8	8	8	8	8	8	8	8	8	8	8	8	8	8	8	8	8	#NULL!	#NULL!	8
A916975002	A916975	2010	1	1	1	A916	2	44	#NULL!	1	2	3	3	5387.77	8895.21	#NULL!	#NULL!	11087.2	10357.8	#NULL!	#NULL!	#NULL!	#NULL!	512	517	1	2	8	2	8	8	2	8	1	8	2	8	2	8	8	8	8	1	1	1	1	0	0	1
A916975003	A916975	2010	1	1	1	A916	2	74	#NULL!	3	2	1	7	5387.77	4445.41	#NULL!	#NULL!	4786.97	4783.81	#NULL!	#NULL!	#NULL!	#NULL!	512	517	1	2	8	2	8	8	2	8	1	8	1	1	2	8	8	8	8	1	1	1	1	0	0	2
A916975004	A916975	2010	1	1	1	A916	1	20	#NULL!	2	2	3	7	5387.77	12945	#NULL!	#NULL!	#NULL!	#NULL!	#NULL!	#NULL!	#NULL!	#NULL!	512	517	1	2	8	8	8	8	2	8	1	8	2	8	2	8	8	8	8	1	1	1	1	0	0	2
A916975005	A916975	2010	1	1	1	A916	1	18	#NULL!	2	2	3	3	5387.77	6503.3	#NULL!	#NULL!	11753.6	15982.3	#NULL!	#NULL!	#NULL!	#NULL!	512	517	1	2	8	8	8	8	8	8	1	8	2	8	2	8	8	8	8	1	1	1	1	0	#NULL!	2
A916975301	A916975	2010	1	1	1	A916	1	66	#NULL!	1	1	2	7	5387.77	2963.47	#NULL!	#NULL!	3230.61	2813.75	#NULL!	#NULL!	#NULL!	#NULL!	512	517	1	2	8	2	8	8	2	8	1	8	2	8	2	8	8	8	8	1	1	1	1	0	0	1
A916975302	A916975	2010	1	1	1	A916	2	65	#NULL!	1	1	1	7	5387.77	2531.61	#NULL!	#NULL!	2605.13	2787.3	#NULL!	#NULL!	#NULL!	#NULL!	512	517	1	1	2	1	2	2	2	8	1	8	1	1	1	2	1	1	2	1	1	1	1	0	0	2
A916975901	A916975	2010	1	1	1	A916	1	62	#NULL!	1	1	1	7	5387.77	5540.06	#NULL!	#NULL!	4666.62	4939.52	#NULL!	#NULL!	#NULL!	#NULL!	512	517	1	2	8	2	8	8	2	8	1	8	2	8	2	8	8	8	8	1	1	1	1	0	0	1
A916975902	A916975	2010	1	1	1	A916	2	59	#NULL!	1	1	2	6	5387.77	6878.34	11343.2	17101.2	5851.08	4531.75	25871.6	11828.3	24125.7	27875.7	512	517	1	2	8	1	2	1	2	8	1	8	2	8	2	8	8	8	8	1	1	1	1	0	0	2
A916975903	A916975	2010	1	1	1	A916	1	15	#NULL!	1	1	2	6	5387.77	6503.3	#NULL!	#NULL!	9402.9	12785.8	#NULL!	#NULL!	#NULL!	#NULL!	512	517	1	2	8	8	8	8	8	8	1	8	2	8	2	8	8	8	8	1	1	1	1	0	#NULL!	1
A916977401	A916977	2010	1	1	1	A916	2	69	#NULL!	1	1	3	7	5387.77	2531.61	3633.87	#NULL!	2605.13	2787.3	#NULL!	3765.17	#NULL!	#NULL!	512	517	1	2	8	2	8	8	2	8	1	8	2	8	2	8	8	8	8	1	1	1	1	0	0	1
A916977701	A916977	2010	1	1	1	A916	2	64	#NULL!	1	1	2	7	5387.77	3459.4	3720.76	8167.54	3458.54	3133.8	14359.1	3894.39	7884.69	14490.1	512	517	1	2	8	2	8	8	2	8	1	8	2	8	2	8	8	8	8	1	1	1	1	0	0	2
A916978103	A916978	2010	1	1	1	A916	1	25	#NULL!	2	3	4	7	5387.77	15988.7	#NULL!	16608.8	16628.8	21975.3	#NULL!	#NULL!	20453.8	#NULL!	512	517	1	2	8	8	8	8	2	8	1	8	2	8	2	8	8	8	8	1	1	1	1	0	0	1
A916978104	A916978	2010	1	1	1	A916	2	24	#NULL!	2	3	4	2	5387.77	12231.9	#NULL!	13078.1	10393.5	17442.3	#NULL!	#NULL!	15813.3	#NULL!	512	517	1	2	8	8	8	8	2	8	1	8	2	8	2	8	8	8	8	1	1	1	1	0	0	1
A916979501	A916979	2010	1	1	1	A916	1	56	#NULL!	3	3	3	3	5387.77	5121.38	6558.62	8139.29	5755.05	5432.27	16843.6	7357.08	8709.64	19356.2	512	517	1	2	8	2	8	8	2	8	2	3	1	1	2	8	8	8	8	1	1	1	1	0	0	2
A916979502	A916979	2010	1	1	1	A916	2	54	#NULL!	3	3	3	3	5387.77	4540.39	4880.77	#NULL!	4782.32	4399.95	#NULL!	5107.8	#NULL!	#NULL!	512	517	1	2	8	2	8	8	2	8	1	8	2	8	2	8	8	8	8	1	1	1	1	0	0	2
A916979503	A916979	2010	1	1	1	A916	2	31	#NULL!	3	3	4	1	5387.77	6366.95	#NULL!	16901.2	5748.42	6115.78	#NULL!	#NULL!	16808.1	#NULL!	512	517	1	2	8	8	8	8	2	8	1	8	2	8	2	8	8	8	8	1	1	1	1	0	0	1
A917970201	A917970	2010	1	1	1	A917	1	63	#NULL!	1	1	1	5	9821.62	5236.64	#NULL!	#NULL!	4962.42	5252.62	#NULL!	#NULL!	#NULL!	#NULL!	512	517	1	1	2	2	8	8	2	8	1	8	2	8	2	8	8	8	8	1	1	1	1	0	0	1
A917970401	A917970	2010	1	1	1	A917	1	31	#NULL!	4	4	4	5	9821.62	12873.8	#NULL!	#NULL!	#NULL!	#NULL!	#NULL!	#NULL!	#NULL!	#NULL!	512	517	1	2	8	8	8	8	2	8	1	8	2	8	2	8	8	8	8	1	1	1	1	0	0	2
A917970402	A917970	2010	1	1	1	A917	2	31	#NULL!	3	4	3	7	9821.62	9027.36	#NULL!	#NULL!	16300.8	13006.9	#NULL!	#NULL!	#NULL!	#NULL!	512	517	1	2	8	8	8	8	2	8	1	8	2	8	2	8	8	8	8	1	1	1	1	0	0	2
A917970403	A917970	2010	1	1	1	A917	2	2	24	4	4	1	#NULL!	9821.62	6170.16	#NULL!	#NULL!	6345.47	7654.16	#NULL!	#NULL!	#NULL!	#NULL!	512	517	1	8	8	8	8	8	8	8	8	8	8	8	8	8	8	8	8	8	8	8	8	#NULL!	#NULL!	8
A917971201	A917971	2010	1	1	1	A917	1	42	#NULL!	2	3	4	3	9821.62	10179	10786	29495.6	10715	13990.9	21981.2	13633.1	26522.8	30543.6	512	517	1	2	8	2	8	8	2	8	1	8	2	8	2	8	8	8	8	1	1	1	1	0	0	1
A917971202	A917971	2010	1	1	1	A917	2	37	#NULL!	2	3	3	3	9821.62	7364.94	#NULL!	#NULL!	7569.45	7478.33	#NULL!	#NULL!	#NULL!	#NULL!	512	517	1	2	8	8	8	8	2	8	1	8	2	8	2	8	8	8	8	1	1	1	1	0	0	2
A917971203	A917971	2010	1	1	1	A917	1	11	#NULL!	2	3	1	#NULL!	9821.62	8035.61	#NULL!	14898.4	7259.19	6811.44	#NULL!	#NULL!	11974.4	#NULL!	512	517	1	2	8	8	8	8	8	8	8	8	8	8	2	8	8	8	8	1	1	1	1	0	#NULL!	8
A917971204	A917971	2010	1	1	1	A917	2	9	#NULL!	2	3	1	#NULL!	9821.62	4872.68	#NULL!	#NULL!	4943.06	5560.24	#NULL!	#NULL!	#NULL!	#NULL!	512	517	1	2	8	8	8	8	8	8	8	8	8	8	2	8	8	8	8	1	1	1	1	0	#NULL!	8
A917971801	A917971	2010	1	1	1	A917	1	43	#NULL!	3	3	3	5	9821.62	10179	10786	29495.6	14286.6	18654.5	21981.2	13633.1	61475.5	30543.6	512	517	1	1	1	2	8	8	2	8	1	8	2	8	1	1	2	1	1	1	2	1	1	0	0	2
A917971802	A917971	2010	1	1	1	A917	2	39	#NULL!	3	3	3	3	9821.62	7364.94	#NULL!	#NULL!	#NULL!	#NULL!	#NULL!	#NULL!	#NULL!	#NULL!	512	517	1	2	8	8	8	8	2	8	1	8	1	1	1	1	1	1	1	1	1	1	1	0	0	2
A917971803	A917971	2010	1	1	1	A917	2	14	#NULL!	3	3	1	#NULL!	9821.62	7141.55	#NULL!	#NULL!	9365.48	9235.3	#NULL!	#NULL!	#NULL!	#NULL!	512	517	1	2	8	8	8	8	8	8	1	8	2	8	2	8	8	8	8	1	1	1	1	0	#NULL!	2
A917971804	A917971	2010	1	1	1	A917	1	13	#NULL!	3	3	1	#NULL!	9821.62	8035.61	#NULL!	#NULL!	9678.92	9081.92	#NULL!	#NULL!	#NULL!	#NULL!	512	517	1	2	8	8	8	8	8	8	1	8	2	8	2	8	8	8	8	1	1	1	1	0	#NULL!	2
A917971902	A917971	2010	1	1	1	A917	2	36	#NULL!	2	2	4	7	9821.62	7364.94	#NULL!	12714.7	7569.45	7478.33	#NULL!	#NULL!	11608.3	#NULL!	512	517	1	2	8	8	8	8	2	8	1	8	2	8	2	8	8	8	8	1	1	1	1	0	0	2
A917971903	A917971	2010	1	1	1	A917	1	4	58	2	2	1	#NULL!	9821.62	6711.95	#NULL!	#NULL!	6873.47	5763	#NULL!	#NULL!	#NULL!	#NULL!	512	517	1	1	2	8	8	8	8	8	8	8	8	8	8	8	8	8	8	8	8	8	8	#NULL!	#NULL!	8
A917971904	A917971	2010	1	1	1	A917	1	4	58	2	2	1	#NULL!	9821.62	6711.95	#NULL!	#NULL!	6873.47	5763	#NULL!	#NULL!	#NULL!	#NULL!	512	517	1	2	8	8	8	8	8	8	8	8	8	8	8	8	8	8	8	8	8	8	8	#NULL!	#NULL!	8
A917973301	A917973	2010	1	1	1	A917	1	57	#NULL!	4	4	2	5	9821.62	7261.33	#NULL!	15387	10879.7	10269.5	#NULL!	#NULL!	16465.3	#NULL!	512	517	1	1	2	2	8	8	2	8	1	8	2	8	2	8	8	8	8	1	1	1	1	0	0	2
A917973302	A917973	2010	1	1	1	A917	2	52	#NULL!	4	4	3	3	9821.62	6437.58	#NULL!	#NULL!	9040.8	8317.95	#NULL!	#NULL!	#NULL!	#NULL!	512	517	1	2	8	2	8	8	2	8	1	8	2	8	2	8	8	8	8	1	1	1	1	0	0	2
A917973303	A917973	2010	1	1	1	A917	1	30	#NULL!	4	4	4	1	9821.62	12873.8	#NULL!	#NULL!	#NULL!	#NULL!	#NULL!	#NULL!	#NULL!	#NULL!	512	517	1	1	1	8	8	8	2	8	1	8	2	8	1	2	1	1	1	1	1	1	1	0	0	2
A917973304	A917973	2010	1	1	1	A917	2	23	#NULL!	4	4	4	2	9821.62	8671.45	#NULL!	18542.7	14736.4	16487	#NULL!	#NULL!	22420.8	#NULL!	512	517	1	2	8	8	8	8	2	8	1	8	2	8	2	8	8	8	8	1	1	1	1	0	0	2
A917973401	A917973	2010	1	1	1	A917	1	73	#NULL!	4	3	1	7	9821.62	3753.69	#NULL!	#NULL!	4067.68	3774.08	#NULL!	#NULL!	#NULL!	#NULL!	512	517	1	2	8	1	2	2	2	8	1	8	2	8	2	8	8	8	8	1	1	1	1	0	0	2
A917973402	A917973	2010	1	1	1	A917	2	63	#NULL!	4	3	1	7	9821.62	4904.91	#NULL!	#NULL!	4903.68	4443.26	#NULL!	#NULL!	#NULL!	#NULL!	512	517	1	1	2	2	8	8	2	8	1	8	2	8	2	8	8	8	8	1	1	1	1	0	0	2
A917973403	A917973	2010	1	1	1	A917	1	40	#NULL!	3	3	4	1	9821.62	10179	23086.4	#NULL!	10715	13990.9	#NULL!	26911.9	#NULL!	#NULL!	512	517	1	2	8	2	8	8	2	8	1	8	2	8	2	8	8	8	8	1	1	1	1	0	0	2
A917973404	A917973	2010	1	1	1	A917	1	34	#NULL!	3	3	3	7	9821.62	12873.8	#NULL!	55608.9	18156.7	18358.2	#NULL!	#NULL!	68003.4	#NULL!	512	517	1	1	2	8	8	8	2	8	1	8	2	8	1	2	2	1	1	1	1	1	1	0	0	2
A917974202	A917974	2010	1	1	1	A917	2	35	#NULL!	4	4	3	7	9821.62	14729.9	#NULL!	#NULL!	7569.45	14956.7	#NULL!	#NULL!	#NULL!	#NULL!	512	517	1	2	8	8	8	8	2	8	1	8	2	8	2	8	8	8	8	1	1	1	1	0	0	2
A917974901	A917974	2010	1	1	1	A917	2	74	#NULL!	2	1	1	7	9821.62	4727.19	#NULL!	#NULL!	4072.32	4069.63	#NULL!	#NULL!	#NULL!	#NULL!	512	517	1	2	8	2	8	8	2	8	2	3	2	8	2	8	8	8	8	1	1	1	1	0	0	2
A917976201	A917976	2010	1	1	1	A917	2	68	#NULL!	3	2	1	6	9821.62	3589.44	5152.28	7069.36	3693.67	3951.97	11303.8	5338.43	7004.49	11560.9	512	517	1	1	2	2	8	8	2	8	3	3	2	8	1	2	2	2	1	1	1	1	1	0	0	2
A917976601	A917976	2010	1	1	1	A917	1	62	#NULL!	2	2	3	5	9821.62	7854.96	6872.54	23006.9	14887.3	15757.8	28622.3	14967.3	25505	29419.3	512	517	1	2	8	1	2	2	2	8	2	3	2	8	2	8	8	8	8	1	2	1	1	0	0	2
A917976602	A917976	2010	1	1	1	A917	2	60	#NULL!	2	2	2	7	9821.62	7357.36	5275.46	#NULL!	#NULL!	#NULL!	#NULL!	#NULL!	#NULL!	#NULL!	512	517	1	2	8	1	2	1	2	8	3	3	1	2	2	8	8	8	8	1	1	1	2	1	0	2
A917977401	A917977	2010	1	1	1	A917	1	36	#NULL!	4	4	4	1	9821.62	10579.4	#NULL!	#NULL!	12864.8	14249.2	#NULL!	#NULL!	#NULL!	#NULL!	512	517	1	1	2	8	8	8	2	8	2	3	2	8	2	8	8	8	8	1	1	1	1	0	0	1
A917977402	A917977	2010	1	1	1	A917	2	37	#NULL!	4	4	3	1	9821.62	7364.94	#NULL!	#NULL!	7569.45	7478.33	#NULL!	#NULL!	#NULL!	#NULL!	512	517	1	1	2	8	8	8	2	8	1	8	2	8	1	1	2	1	1	2	2	1	1	0	0	2
A917978101	A917978	2010	1	1	1	A917	2	76	#NULL!	#NULL!	#NULL!	1	7	9821.62	15609.5	29099.5	#NULL!	16708.8	14458.4	#NULL!	30733.9	#NULL!	#NULL!	512	517	1	2	8	2	8	8	2	8	1	8	2	8	2	8	8	8	8	1	1	1	1	0	0	2
A917978104	A917978	2010	1	1	1	A917	1	18	#NULL!	#NULL!	#NULL!	2	7	9821.62	9220.68	#NULL!	#NULL!	#NULL!	#NULL!	#NULL!	#NULL!	#NULL!	#NULL!	512	517	1	1	2	8	8	8	8	8	1	8	1	1	2	8	8	8	8	1	2	1	1	0	#NULL!	1
A917978105	A917978	2010	1	1	1	A917	2	11	#NULL!	#NULL!	#NULL!	1	#NULL!	9821.62	7141.55	#NULL!	25168	7024.11	17316.2	#NULL!	#NULL!	35550.2	#NULL!	512	517	1	2	8	8	8	8	8	8	8	8	8	8	2	8	8	8	8	1	1	1	1	0	#NULL!	8
A917978801	A917978	2010	1	1	1	A917	1	72	#NULL!	1	1	1	7	9821.62	5630.53	#NULL!	#NULL!	4067.68	5661.12	#NULL!	#NULL!	#NULL!	#NULL!	512	517	1	2	8	2	8	8	2	8	2	3	1	1	2	8	8	8	8	1	1	1	1	0	0	2
A917978802	A917978	2010	1	1	1	A917	2	69	#NULL!	1	1	1	7	9821.62	5384.16	#NULL!	#NULL!	3693.67	5927.95	#NULL!	#NULL!	#NULL!	#NULL!	512	517	1	2	8	2	8	8	2	8	1	8	2	8	2	8	8	8	8	1	1	1	1	0	0	2
A918968001	A918968	2010	1	1	1	A918	1	38	#NULL!	1	2	3	5	5874.65	8587.87	#NULL!	20344	10443.1	11566.9	#NULL!	#NULL!	27463.3	#NULL!	512	517	1	2	8	8	8	8	2	8	1	8	2	8	1	1	2	1	2	1	1	1	2	1	0	2
A918968002	A918968	2010	1	1	1	A918	2	29	#NULL!	1	2	3	7	5874.65	11338.2	#NULL!	#NULL!	10612.5	8789.52	#NULL!	#NULL!	#NULL!	#NULL!	512	517	1	2	8	8	8	8	2	8	1	8	2	8	2	8	8	8	8	1	1	1	1	0	0	2
A918968003	A918968	2010	1	1	1	A918	1	4	51	1	2	1	#NULL!	5874.65	5448.45	#NULL!	#NULL!	5579.56	4678.14	#NULL!	#NULL!	#NULL!	#NULL!	512	517	1	2	8	8	8	8	8	8	8	8	8	8	8	8	8	8	8	8	8	8	8	#NULL!	#NULL!	8
A918968101	A918968	2010	1	1	1	A918	2	80	#NULL!	1	1	2	7	5874.65	4247.97	#NULL!	#NULL!	4274.9	4694.68	#NULL!	#NULL!	#NULL!	#NULL!	512	517	1	2	8	1	3	2	2	8	2	3	2	8	2	8	8	8	8	1	1	1	1	0	0	2
A918968501	A918968	2010	1	1	1	A918	2	26	#NULL!	2	3	3	7	5874.65	11338.2	#NULL!	10945.9	10612.5	8789.52	#NULL!	#NULL!	12242.8	#NULL!	512	517	1	2	8	8	8	8	2	8	1	8	2	8	1	1	1	1	2	1	1	1	1	0	0	1
A918968502	A918968	2010	1	1	1	A918	1	23	#NULL!	2	3	3	3	5874.65	11174.2	#NULL!	15941.4	19634.5	25474.6	#NULL!	#NULL!	23193.9	#NULL!	512	517	1	1	9	8	8	8	2	8	1	8	2	8	1	1	2	1	2	1	1	1	1	0	0	2
A918968503	A918968	2010	1	1	1	A918	2	50	#NULL!	2	3	2	3	5874.65	5225.73	5617.49	#NULL!	5504.18	5064.1	#NULL!	5878.79	#NULL!	#NULL!	512	517	1	2	8	2	8	8	2	8	1	8	2	8	1	1	1	1	2	1	1	1	1	0	0	2
A918968701	A918968	2010	1	1	1	A918	1	62	#NULL!	4	4	3	1	5874.65	4250.86	5578.82	#NULL!	4028.26	4263.83	#NULL!	6074.88	#NULL!	#NULL!	512	517	1	2	8	1	3	2	2	8	2	3	1	2	2	8	8	8	8	1	1	1	1	0	0	2
A918968702	A918968	2010	1	1	1	A918	2	54	#NULL!	4	4	3	5	5874.65	5225.73	5617.49	32364.7	5504.18	5064.1	31632.2	5878.79	36381	35816.3	512	517	1	2	8	2	8	8	2	8	1	8	2	8	2	8	8	8	8	1	1	1	1	0	0	2
A918968703	A918968	2010	1	1	1	A918	2	21	#NULL!	4	4	3	7	5874.65	7039.08	#NULL!	#NULL!	8971.76	10037.6	#NULL!	#NULL!	#NULL!	#NULL!	512	517	1	2	8	8	8	8	2	8	1	8	2	8	2	8	8	8	8	1	1	1	1	0	0	2
A918969101	A918969	2010	1	1	1	A918	1	66	#NULL!	3	2	3	1	5874.65	6821.58	9094.53	12771.6	#NULL!	#NULL!	19942	#NULL!	#NULL!	#NULL!	512	517	1	2	8	2	8	8	2	8	1	8	2	8	2	8	8	8	8	1	1	1	1	0	0	2
A918971801	A918971	2010	1	1	1	A918	2	40	#NULL!	1	1	2	6	5874.65	7678.41	9772.76	16163.5	#NULL!	#NULL!	21833.2	#NULL!	#NULL!	#NULL!	512	517	1	2	8	2	8	8	2	8	1	8	2	8	2	8	8	8	8	1	1	1	1	0	0	2
A918971802	A918971	2010	1	1	1	A918	1	18	#NULL!	1	1	2	7	5874.65	7484.93	#NULL!	#NULL!	16233.3	16555.2	#NULL!	#NULL!	#NULL!	#NULL!	512	517	1	2	8	8	8	8	8	8	1	8	2	8	2	8	8	8	8	1	1	1	1	0	#NULL!	1
A918971803	A918971	2010	1	1	1	A918	1	11	#NULL!	1	1	1	#NULL!	5874.65	6522.94	#NULL!	#NULL!	5892.67	8293.82	#NULL!	#NULL!	#NULL!	#NULL!	512	517	1	2	8	8	8	8	8	8	8	8	8	8	2	8	8	8	8	1	1	1	1	0	#NULL!	8
A918971901	A918971	2010	1	1	1	A918	1	50	#NULL!	3	4	4	3	5874.65	10347	10050.8	17460.3	11904	10558.5	33340.5	12556.4	36259.4	43903.6	512	517	1	2	8	2	8	8	2	8	1	8	2	8	2	8	8	8	8	1	1	1	1	0	0	2
A918971902	A918971	2010	1	1	1	A918	2	51	#NULL!	4	4	2	5	5874.65	5225.73	5617.49	#NULL!	5504.18	5064.1	#NULL!	5878.79	#NULL!	#NULL!	512	517	1	2	8	1	2	2	2	8	2	3	2	8	2	8	8	8	8	1	1	1	1	0	0	2
A918971903	A918971	2010	1	1	1	A918	2	19	#NULL!	4	4	3	2	5874.65	12361	#NULL!	15327.5	11374.7	8903.58	#NULL!	#NULL!	18824	#NULL!	512	517	1	2	8	8	8	8	2	8	1	8	2	8	2	8	8	8	8	1	1	1	1	0	0	1
A918971904	A918971	2010	1	1	1	A918	1	17	#NULL!	4	4	2	7	5874.65	7484.93	#NULL!	#NULL!	8116.66	11036.8	#NULL!	#NULL!	#NULL!	#NULL!	512	517	1	1	2	8	8	8	8	8	1	8	2	8	1	2	1	1	2	1	1	1	1	0	#NULL!	1
A918971905	A918971	2010	1	1	1	A918	1	14	#NULL!	4	4	1	#NULL!	5874.65	6522.94	#NULL!	#NULL!	5892.67	5529.21	#NULL!	#NULL!	#NULL!	#NULL!	512	517	1	2	8	8	8	8	8	8	1	8	2	8	2	8	8	8	8	1	1	1	1	0	#NULL!	2
A918972501	A918972	2010	1	1	1	A918	1	38	#NULL!	1	2	1	5	5874.65	8587.87	#NULL!	20344	#NULL!	#NULL!	#NULL!	#NULL!	#NULL!	#NULL!	512	517	1	2	8	8	8	8	2	8	1	8	2	8	2	8	8	8	8	1	1	1	1	0	0	2
A918972502	A918972	2010	1	1	1	A918	2	39	#NULL!	1	2	3	7	5874.65	5978.52	#NULL!	#NULL!	#NULL!	#NULL!	#NULL!	#NULL!	#NULL!	#NULL!	512	517	1	2	8	8	8	8	2	8	1	8	2	8	2	8	8	8	8	1	1	1	1	0	0	2
A918972503	A918972	2010	1	1	1	A918	2	12	#NULL!	1	2	1	#NULL!	5874.65	5797.18	#NULL!	#NULL!	#NULL!	#NULL!	#NULL!	#NULL!	#NULL!	#NULL!	512	517	1	2	8	8	8	8	8	8	1	8	2	8	2	8	8	8	8	1	1	1	1	0	#NULL!	2
A918972504	A918972	2010	1	1	1	A918	1	11	#NULL!	1	2	1	#NULL!	5874.65	6522.94	#NULL!	#NULL!	#NULL!	#NULL!	#NULL!	#NULL!	#NULL!	#NULL!	512	517	1	2	8	8	8	8	8	8	8	8	8	8	2	8	8	8	8	1	1	1	1	0	#NULL!	8
A918972901	A918972	2010	1	1	1	A918	1	42	#NULL!	2	3	3	5	5874.65	8262.83	8755.57	23943.1	8697.92	11357.2	35686.7	11066.8	28706.6	49587.7	512	517	1	2	8	2	8	8	2	8	1	8	2	8	1	1	1	1	2	1	1	1	1	0	0	2
A918972902	A918972	2010	1	1	1	A918	2	51	#NULL!	2	3	1	6	5874.65	5225.73	5617.49	#NULL!	5504.18	5064.1	#NULL!	5878.79	#NULL!	#NULL!	512	517	1	2	8	1	3	2	2	8	2	3	2	8	1	1	1	1	1	1	1	1	1	0	0	2
A918973601	A918973	2010	1	1	1	A918	2	81	#NULL!	1	1	1	7	5874.65	4247.97	#NULL!	#NULL!	4274.9	4694.68	#NULL!	#NULL!	#NULL!	#NULL!	512	517	1	2	8	2	8	8	2	8	1	8	2	8	2	8	8	8	8	1	1	1	1	0	0	2
A918973701	A918973	2010	1	1	1	A918	2	64	#NULL!	2	2	3	7	5874.65	3981.58	#NULL!	9400.37	3980.58	3606.83	#NULL!	#NULL!	9074.83	#NULL!	512	517	1	2	8	2	8	8	2	8	2	3	2	8	2	8	8	8	8	1	1	1	1	0	0	2
A918974901	A918974	2010	1	1	1	A918	2	73	#NULL!	3	2	1	7	5874.65	3837.31	#NULL!	#NULL!	3305.72	3303.54	#NULL!	#NULL!	#NULL!	#NULL!	512	517	1	2	8	1	3	2	1	2	3	3	2	8	2	8	8	8	8	1	1	1	1	0	1	2
A918974902	A918974	2010	1	1	1	A918	2	55	#NULL!	1	2	3	6	5874.65	5277.72	8703.57	#NULL!	5050.7	3911.84	#NULL!	9075.77	#NULL!	#NULL!	512	517	1	1	2	2	8	8	2	8	1	8	2	8	1	2	1	1	2	1	1	1	1	0	0	2
A918974903	A918974	2010	1	1	1	A918	1	26	#NULL!	1	2	4	3	5874.65	12546.3	#NULL!	#NULL!	14680.5	16037.9	#NULL!	#NULL!	#NULL!	#NULL!	512	517	1	2	8	8	8	8	2	8	1	8	2	8	1	1	1	1	2	1	1	1	1	0	0	1
A918974904	A918974	2010	1	1	1	A918	2	23	#NULL!	1	2	3	5	5874.65	7039.08	#NULL!	#NULL!	8971.76	10037.6	#NULL!	#NULL!	#NULL!	#NULL!	512	517	1	2	8	8	8	8	2	8	1	8	2	8	2	8	8	8	8	1	1	1	1	0	0	1
A918975701	A918975	2010	1	1	1	A918	1	40	#NULL!	1	2	1	2	5874.65	8262.83	8755.57	11971.6	8697.92	11357.2	17843.3	11066.8	21530	24793.9	512	517	1	2	8	2	8	8	2	8	1	8	2	8	2	8	8	8	8	1	1	1	1	0	0	2
A918975702	A918975	2010	1	1	1	A918	2	37	#NULL!	1	2	3	1	5874.65	5978.52	#NULL!	10321.2	6144.53	6070.57	#NULL!	#NULL!	14134.6	#NULL!	512	517	1	1	9	8	8	8	2	8	1	8	2	8	2	8	8	8	8	1	1	1	1	0	0	2
A918975703	A918975	2010	1	1	1	A918	1	12	#NULL!	1	2	1	#NULL!	5874.65	6522.94	#NULL!	#NULL!	5892.67	5529.21	#NULL!	#NULL!	#NULL!	#NULL!	512	517	1	2	8	8	8	8	8	8	1	8	2	8	2	8	8	8	8	1	1	1	1	0	#NULL!	2
A918975704	A918975	2010	1	1	1	A918	1	9	#NULL!	1	2	1	#NULL!	5874.65	4378.01	#NULL!	#NULL!	4530.99	4465.03	#NULL!	#NULL!	#NULL!	#NULL!	512	517	1	2	8	8	8	8	8	8	8	8	8	8	1	1	2	1	2	2	2	1	1	0	#NULL!	8
A918976201	A918976	2010	1	1	1	A918	1	71	#NULL!	3	2	3	6	5874.65	6094.14	9806.36	#NULL!	3301.96	6127.25	#NULL!	9754.73	#NULL!	#NULL!	512	517	1	2	8	2	8	8	2	8	1	8	2	8	2	8	8	8	8	1	1	1	1	0	0	2
A918976802	A918976	2010	1	1	1	A918	2	32	#NULL!	4	4	4	1	5874.65	7327.99	#NULL!	12968.2	6616.1	7038.92	#NULL!	#NULL!	12896.8	#NULL!	512	517	1	2	8	8	8	8	2	8	1	8	2	8	1	1	1	1	2	1	1	1	1	0	0	2
A918976803	A918976	2010	1	1	1	A918	2	2	24	4	4	1	#NULL!	5874.65	5008.65	#NULL!	#NULL!	5150.96	4142.19	#NULL!	#NULL!	#NULL!	#NULL!	512	517	1	8	8	8	8	8	8	8	8	8	8	8	8	8	8	8	8	8	8	8	8	#NULL!	#NULL!	8
A918977901	A918977	2010	1	1	1	A918	2	76	#NULL!	1	1	1	7	5874.65	4247.97	19410.8	#NULL!	4274.9	4694.68	#NULL!	19830.5	#NULL!	#NULL!	512	517	1	2	8	1	3	2	2	8	1	8	2	8	2	8	8	8	8	1	1	1	1	0	0	2
A918977902	A918977	2010	1	1	1	A918	1	11	#NULL!	1	1	1	#NULL!	5874.65	6522.94	#NULL!	#NULL!	5892.67	5529.21	#NULL!	#NULL!	#NULL!	#NULL!	512	517	1	2	8	8	8	8	8	8	8	8	8	8	2	8	8	8	8	1	1	1	1	0	#NULL!	8
A918978102	A918978	2010	1	1	1	A918	2	66	#NULL!	2	1	1	7	5874.65	5827.48	#NULL!	#NULL!	5996.7	6416.05	#NULL!	#NULL!	#NULL!	#NULL!	512	517	1	2	8	1	3	2	2	8	1	8	1	1	1	2	1	1	2	1	1	1	1	0	0	2
A918978801	A918978	2010	1	1	1	A918	1	40	#NULL!	2	3	4	1	5874.65	8262.83	8755.57	#NULL!	#NULL!	#NULL!	#NULL!	#NULL!	#NULL!	#NULL!	512	517	1	2	8	2	8	8	2	8	1	8	2	8	2	8	8	8	8	1	1	1	1	0	0	2
A918978802	A918978	2010	1	1	1	A918	2	36	#NULL!	2	3	3	7	5874.65	5978.52	#NULL!	#NULL!	12289.1	8094.09	#NULL!	#NULL!	#NULL!	#NULL!	512	517	1	2	8	8	8	8	2	8	1	8	2	8	2	8	8	8	8	1	1	1	1	0	0	2
A918978803	A918978	2010	1	1	1	A918	1	8	#NULL!	2	3	1	#NULL!	5874.65	4378.01	#NULL!	#NULL!	4530.99	5953.37	#NULL!	#NULL!	#NULL!	#NULL!	512	517	1	2	8	8	8	8	8	8	8	8	8	8	2	8	8	8	8	1	1	1	1	0	#NULL!	8
A918978804	A918978	2010	1	1	1	A918	1	4	51	2	3	1	#NULL!	5874.65	5448.45	#NULL!	#NULL!	5579.56	6237.52	#NULL!	#NULL!	#NULL!	#NULL!	512	517	1	1	1	8	8	8	8	8	8	8	8	8	8	8	8	8	8	8	8	8	8	#NULL!	#NULL!	8
A918979501	A918979	2010	1	1	1	A918	1	45	#NULL!	1	2	3	3	5874.65	13198.2	21275.9	#NULL!	15849.6	13168.8	#NULL!	27763.5	#NULL!	#NULL!	512	517	1	2	8	2	8	8	2	8	1	8	2	8	1	2	2	1	2	1	1	1	1	0	0	2
A918979502	A918979	2010	1	1	1	A918	2	42	#NULL!	2	2	3	6	5874.65	7678.41	#NULL!	#NULL!	7656.44	7152.75	#NULL!	#NULL!	#NULL!	#NULL!	512	517	1	2	8	1	3	2	2	8	1	8	2	8	2	8	8	8	8	1	1	1	1	0	0	2
A918979503	A918979	2010	1	1	1	A918	1	11	#NULL!	2	2	1	#NULL!	5874.65	6522.94	#NULL!	12093.9	5892.67	5529.21	#NULL!	#NULL!	12960.3	#NULL!	512	517	1	2	8	8	8	8	8	8	8	8	8	8	2	8	8	8	8	1	1	1	1	0	#NULL!	8
A918979504	A918979	2010	1	1	1	A918	2	10	#NULL!	2	2	1	#NULL!	5874.65	5797.18	#NULL!	10215.1	5701.85	5622.59	#NULL!	#NULL!	11543.2	#NULL!	512	517	1	2	8	8	8	8	8	8	8	8	8	8	2	8	8	8	8	1	1	1	1	0	#NULL!	8
A919970101	A919970	2010	1	1	1	A919	2	74	#NULL!	3	1	1	7	6135.24	3585.69	#NULL!	#NULL!	3088.95	3086.91	#NULL!	#NULL!	#NULL!	#NULL!	512	517	1	2	8	1	3	2	2	8	2	3	2	8	2	8	8	8	8	1	1	1	1	0	0	2
A919970202	A919970	2010	1	1	1	A919	2	45	#NULL!	2	3	3	5	6135.24	14814.2	15214.3	19223.6	15773.9	8883.08	30235.2	16190.3	13332.5	33607.9	512	517	1	2	8	2	8	8	2	8	2	3	2	8	1	1	1	1	2	1	1	1	1	0	0	2
A919970203	A919970	2010	1	1	1	A919	1	11	#NULL!	2	3	1	#NULL!	6135.24	6095.21	#NULL!	11300.8	5506.27	7749.96	#NULL!	#NULL!	9082.84	#NULL!	512	517	1	1	2	8	8	8	8	8	8	8	8	8	1	1	1	1	2	1	1	1	1	0	#NULL!	8
A919970501	A919970	2010	1	1	1	A919	1	49	#NULL!	2	3	3	7	6135.24	15869.9	19880.8	37135.6	17353	16407	30724.1	26348.9	59486.5	40636.5	512	517	1	2	8	2	8	8	2	8	1	8	2	8	1	1	2	1	1	1	1	1	1	0	0	2
A919970502	A919970	2010	1	1	1	A919	2	43	#NULL!	3	3	3	6	6135.24	10762.4	#NULL!	#NULL!	9539.17	8911.63	#NULL!	#NULL!	#NULL!	#NULL!	512	517	1	2	8	2	8	8	2	8	1	8	2	8	2	8	8	8	8	1	1	1	1	0	0	2
A919970504	A919970	2010	1	1	1	A919	1	17	#NULL!	3	3	2	7	6135.24	6994.11	#NULL!	#NULL!	10112.6	13750.8	#NULL!	#NULL!	#NULL!	#NULL!	512	517	1	2	8	8	8	8	8	8	1	8	2	8	2	8	8	8	8	1	1	1	1	0	#NULL!	2
A919971001	A919971	2010	1	1	1	A919	1	50	#NULL!	1	2	3	5	6135.24	9668.47	18783.5	32630.8	#NULL!	#NULL!	31154.2	#NULL!	#NULL!	#NULL!	512	517	1	1	2	2	8	8	2	8	1	8	2	8	2	8	8	8	8	1	1	1	1	0	0	2
A919971002	A919971	2010	1	1	1	A919	2	45	#NULL!	1	2	3	7	6135.24	7407.09	#NULL!	#NULL!	10516	7896.07	#NULL!	#NULL!	#NULL!	#NULL!	512	517	1	2	8	2	8	8	2	8	1	8	2	8	1	2	1	1	2	1	1	1	1	0	0	2
A919971003	A919971	2010	1	1	1	A919	2	19	#NULL!	2	2	3	6	6135.24	11550.4	#NULL!	#NULL!	14171.8	11093	#NULL!	#NULL!	#NULL!	#NULL!	512	517	1	1	2	8	8	8	2	8	1	8	1	1	1	2	1	1	2	1	1	1	1	0	0	1
A919971004	A919971	2010	1	1	1	A919	2	16	#NULL!	2	2	2	7	6135.24	11550.4	#NULL!	9548.3	14171.8	11093	#NULL!	#NULL!	28143.4	#NULL!	512	517	1	2	8	8	8	8	8	8	1	8	1	1	2	8	8	8	8	1	1	1	1	0	#NULL!	1
A919971301	A919971	2010	1	1	1	A919	2	46	#NULL!	2	3	4	1	6135.24	7407.09	#NULL!	9611.82	7886.97	5922.05	#NULL!	#NULL!	8888.32	#NULL!	512	517	1	2	8	2	8	8	2	8	1	8	2	8	2	8	8	8	8	1	1	1	1	0	0	2
A919971401	A919971	2010	1	1	1	A919	1	67	#NULL!	3	2	1	7	6135.24	3187.13	4249.08	#NULL!	3474.43	3026.11	#NULL!	4754.42	#NULL!	#NULL!	512	517	1	2	8	2	8	8	1	2	3	3	1	2	2	8	8	8	8	1	1	1	1	0	1	2
A919971402	A919971	2010	1	1	1	A919	2	64	#NULL!	3	2	1	6	6135.24	3720.49	4001.57	17567.9	3719.56	3370.32	30885.7	4188.31	16959.5	31167.4	512	517	1	2	8	1	3	2	2	8	1	8	2	8	2	8	8	8	8	1	1	1	1	0	0	2
A919971601	A919971	2010	1	1	1	A919	1	39	#NULL!	1	2	3	6	6135.24	8024.73	#NULL!	#NULL!	13011	18699.5	#NULL!	#NULL!	#NULL!	#NULL!	512	517	1	1	2	8	8	8	2	8	1	8	2	8	1	1	1	1	1	1	1	1	1	0	0	2
A919971602	A919971	2010	1	1	1	A919	2	39	#NULL!	1	2	3	6	6135.24	5586.49	#NULL!	#NULL!	7655.48	11345	#NULL!	#NULL!	#NULL!	#NULL!	512	517	1	2	8	8	8	8	2	8	1	8	2	8	2	8	8	8	8	1	1	1	1	0	0	2
A919971801	A919971	2010	1	1	1	A919	1	35	#NULL!	4	4	4	#NULL!	6135.24	8024.73	#NULL!	19010	9758.26	10808.4	#NULL!	#NULL!	25662.5	#NULL!	512	517	1	2	8	8	8	8	2	8	1	8	2	8	2	8	8	8	8	1	1	1	1	0	0	2
A919971802	A919971	2010	1	1	1	A919	2	34	#NULL!	4	4	3	3	6135.24	6847.47	#NULL!	#NULL!	6182.26	6577.35	#NULL!	#NULL!	#NULL!	#NULL!	512	517	1	1	2	8	8	8	1	2	1	8	1	1	1	1	1	1	2	1	1	1	1	0	1	2
A919971803	A919971	2010	1	1	1	A919	1	9	#NULL!	4	4	1	#NULL!	6135.24	4090.93	#NULL!	#NULL!	4233.87	4172.24	#NULL!	#NULL!	#NULL!	#NULL!	512	517	1	2	8	8	8	8	8	8	8	8	8	8	2	8	8	8	8	1	1	1	1	0	#NULL!	8
A919971804	A919971	2010	1	1	1	A919	1	7	#NULL!	4	4	1	#NULL!	6135.24	4090.93	#NULL!	#NULL!	4233.87	4172.24	#NULL!	#NULL!	#NULL!	#NULL!	512	517	1	2	8	8	8	8	8	8	8	8	8	8	2	8	8	8	8	1	1	1	1	0	#NULL!	8
A919972001	A919972	2010	1	1	1	A919	1	73	#NULL!	2	1	4	7	6135.24	2847.26	#NULL!	#NULL!	3085.44	2862.73	#NULL!	#NULL!	#NULL!	#NULL!	512	517	1	2	8	1	1	2	2	8	1	8	2	8	2	8	8	8	8	1	1	1	1	0	0	2
A919972002	A919972	2010	1	1	1	A919	2	69	#NULL!	2	1	3	7	6135.24	2722.68	7816.25	#NULL!	2801.74	2997.66	#NULL!	8098.66	#NULL!	#NULL!	512	517	1	2	8	1	2	2	1	2	1	8	1	1	1	2	1	1	2	1	1	1	1	0	1	2
A919972502	A919972	2010	1	1	1	A919	2	67	#NULL!	#NULL!	#NULL!	1	7	6135.24	5445.35	7816.25	#NULL!	4202.61	4496.5	#NULL!	8098.66	#NULL!	#NULL!	512	517	1	2	8	2	8	8	2	8	1	8	1	1	2	8	8	8	8	1	1	1	1	0	0	2
A919972503	A919972	2010	1	1	1	A919	1	18	#NULL!	#NULL!	#NULL!	3	7	6135.24	6994.11	#NULL!	#NULL!	11376.6	15469.6	#NULL!	#NULL!	#NULL!	#NULL!	512	517	1	1	9	8	8	8	8	8	1	8	2	8	1	2	2	1	1	1	1	1	1	0	#NULL!	2
A919973101	A919973	2010	1	1	1	A919	1	45	#NULL!	2	3	3	6	6135.24	12332.8	#NULL!	#NULL!	14810.3	12305.2	#NULL!	#NULL!	#NULL!	#NULL!	512	517	1	2	8	2	8	8	2	8	1	8	1	1	2	8	8	8	8	1	1	1	1	0	0	2
A919973102	A919973	2010	1	1	1	A919	2	41	#NULL!	2	3	3	7	6135.24	7174.91	18263.8	#NULL!	7154.38	6683.72	#NULL!	16986.3	#NULL!	#NULL!	512	517	1	2	8	2	8	8	2	8	1	8	2	8	2	8	8	8	8	1	1	1	1	0	0	2
A919973801	A919973	2010	1	1	1	A919	1	77	#NULL!	2	1	1	7	6135.24	3193.21	#NULL!	#NULL!	3772.87	3552.05	#NULL!	#NULL!	#NULL!	#NULL!	512	517	1	2	8	1	1	1	2	8	2	3	1	1	2	8	8	8	8	1	1	1	1	0	0	2
A919973802	A919973	2010	1	1	1	A919	1	43	#NULL!	1	1	2	7	6135.24	7721	16362.9	#NULL!	8127.57	10612.4	#NULL!	20682.1	#NULL!	#NULL!	512	517	1	2	8	1	1	2	2	8	1	8	2	8	2	8	8	8	8	1	1	1	1	0	0	2
A919976103	A919976	2010	1	1	1	A919	1	21	#NULL!	3	3	3	6	6135.24	16377.5	#NULL!	29792	#NULL!	#NULL!	#NULL!	#NULL!	#NULL!	#NULL!	512	517	1	1	2	8	8	8	2	8	1	8	1	1	1	1	1	1	2	1	1	1	1	0	0	1
A919976401	A919976	2010	1	1	1	A919	1	74	#NULL!	2	1	1	7	6135.24	2847.26	9163.32	#NULL!	3085.44	2862.73	#NULL!	9115.08	#NULL!	#NULL!	512	517	1	2	8	1	3	2	2	8	1	8	2	8	2	8	8	8	8	1	1	1	1	0	0	2
A919976402	A919976	2010	1	1	1	A919	2	68	#NULL!	2	1	#NULL!	#NULL!	6135.24	2722.68	#NULL!	#NULL!	2801.74	2997.66	#NULL!	#NULL!	#NULL!	#NULL!	512	517	1	2	8	1	3	1	1	1	3	3	1	1	2	8	8	8	8	1	1	1	1	0	1	2
A919977401	A919977	2010	1	1	1	A919	1	65	#NULL!	1	1	2	7	6135.24	3187.13	4249.08	11934.2	3474.43	3026.11	18634.3	4754.42	13019.2	21644.6	512	517	1	2	8	2	8	8	2	8	1	8	2	8	2	8	8	8	8	1	1	1	1	0	0	2
A919977402	A919977	2010	1	1	1	A919	2	66	#NULL!	1	1	2	7	6135.24	2722.68	3908.13	#NULL!	2801.74	2997.66	#NULL!	4049.33	#NULL!	#NULL!	512	517	1	2	8	2	8	8	2	8	1	8	2	8	2	8	8	8	8	1	1	1	1	0	0	2
A919978101	A919978	2010	1	1	1	A919	1	28	#NULL!	2	2	4	3	6135.24	11723.6	#NULL!	8931.17	13717.8	14986.2	#NULL!	#NULL!	10998.7	#NULL!	512	517	1	2	8	8	8	8	1	1	1	8	2	8	2	8	8	8	8	1	1	1	1	0	1	1
A919978102	A919978	2010	1	1	1	A919	2	30	#NULL!	2	2	4	2	6135.24	6847.47	#NULL!	12117.9	6182.26	6577.35	#NULL!	#NULL!	12051.1	#NULL!	512	517	1	2	8	8	8	8	1	1	1	8	2	8	2	8	8	8	8	1	1	1	1	0	1	2
A919979701	A919979	2010	1	1	1	A919	2	61	#NULL!	3	2	1	7	6135.24	7440.98	#NULL!	#NULL!	7439.12	6740.64	#NULL!	#NULL!	#NULL!	#NULL!	512	517	1	2	8	1	2	2	2	8	2	3	1	2	2	8	8	8	8	1	1	1	1	0	0	2
A920966902	A920966	2010	1	1	2	A920	2	41	#NULL!	3	3	3	1	4072.07	8403.74	10695.9	17690.4	5586.46	5218.95	23895.6	9947.78	14249	24739.8	501	501	1	2	8	2	8	8	2	8	1	8	2	8	2	8	8	8	8	1	1	1	1	0	0	2
A920966903	A920966	2010	1	1	2	A920	2	14	#NULL!	3	3	1	#NULL!	4072.07	3172.4	#NULL!	11180.1	4160.31	4102.48	#NULL!	#NULL!	6316.81	#NULL!	501	501	1	2	8	8	8	8	8	8	1	8	2	8	1	2	1	1	1	1	2	1	1	0	#NULL!	1
A920966904	A920966	2010	1	1	2	A920	1	12	#NULL!	3	3	1	#NULL!	4072.07	3569.56	#NULL!	#NULL!	4299.54	4034.35	#NULL!	#NULL!	#NULL!	#NULL!	501	501	1	2	8	8	8	8	8	8	1	8	2	8	1	1	1	1	2	2	2	1	1	0	#NULL!	2
A920968001	A920968	2010	1	1	2	A920	1	82	#NULL!	3	2	4	1	4072.07	1870.05	#NULL!	#NULL!	#NULL!	#NULL!	#NULL!	#NULL!	#NULL!	#NULL!	501	501	1	2	8	2	8	8	2	8	1	8	1	1	2	8	8	8	8	1	1	1	1	0	0	2
A920968002	A920968	2010	1	1	2	A920	2	70	#NULL!	3	2	3	7	4072.07	2099.9	6829.56	#NULL!	#NULL!	#NULL!	#NULL!	#NULL!	#NULL!	#NULL!	501	501	1	2	8	1	2	2	2	8	1	8	2	8	2	8	8	8	8	1	1	1	1	0	0	2
A920968003	A920968	2010	1	1	2	A920	1	39	#NULL!	1	2	4	7	4072.07	4699.56	#NULL!	16699.3	16375.8	18699.5	#NULL!	#NULL!	22543.2	#NULL!	501	501	1	2	8	8	8	8	2	8	1	8	2	8	2	8	8	8	8	1	1	1	1	0	0	2
A920968301	A920968	2010	1	1	2	A920	2	43	#NULL!	4	4	4	3	4072.07	4201.87	5347.96	8845.2	4189.85	3914.21	11947.8	4973.89	14249	12369.9	501	501	1	2	8	2	8	8	2	8	1	8	2	8	2	8	8	8	8	1	1	1	1	0	0	2
A920968302	A920968	2010	1	1	2	A920	2	17	#NULL!	4	4	2	7	4072.07	6764.31	#NULL!	#NULL!	6224.61	4872.32	#NULL!	#NULL!	#NULL!	#NULL!	501	501	1	1	2	8	8	8	8	8	1	8	2	8	2	8	8	8	8	1	1	1	1	0	#NULL!	1
A920968602	A920968	2010	1	1	2	A920	2	49	#NULL!	1	2	1	7	4072.07	4337.85	4455	#NULL!	4618.88	3468.15	#NULL!	4740.79	#NULL!	#NULL!	501	501	1	2	8	2	8	8	2	8	1	8	2	8	2	8	8	8	8	1	1	1	1	0	0	2
A920968604	A920968	2010	1	1	2	A920	1	5	71	1	2	1	#NULL!	4072.07	2395.79	#NULL!	#NULL!	2479.5	2443.41	#NULL!	#NULL!	#NULL!	#NULL!	501	501	1	1	1	8	8	8	8	8	8	8	8	8	8	8	8	8	8	8	8	8	8	#NULL!	#NULL!	8
A920969001	A920969	2010	1	1	2	A920	1	49	#NULL!	1	2	3	1	4072.07	10833.7	11642.9	21747.9	11564.5	9608.49	17993.1	15430.8	17418.7	23798.1	501	501	1	2	8	2	8	8	2	8	1	8	2	8	2	8	8	8	8	1	1	1	1	0	0	2
A920969002	A920969	2010	1	1	2	A920	2	45	#NULL!	1	2	3	3	4072.07	6506.77	#NULL!	#NULL!	6158.5	4624.21	#NULL!	#NULL!	#NULL!	#NULL!	501	501	1	2	8	1	2	2	2	8	1	8	1	1	2	8	8	8	8	1	1	1	1	0	0	2
A920969004	A920969	2010	1	1	2	A920	1	17	#NULL!	2	2	2	7	4072.07	4095.99	#NULL!	8590.93	5922.26	8052.93	#NULL!	#NULL!	12675	#NULL!	501	501	1	2	8	8	8	8	8	8	1	8	1	1	1	2	1	1	2	1	1	1	1	0	#NULL!	1
A920970102	A920970	2010	1	1	2	A920	2	36	#NULL!	4	4	4	2	4072.07	3271.64	#NULL!	#NULL!	3362.48	3322.01	#NULL!	#NULL!	#NULL!	#NULL!	501	501	1	2	8	8	8	8	2	8	1	8	2	8	2	8	8	8	8	1	1	1	1	0	0	2
A920970103	A920970	2010	1	1	2	A920	1	2	33	4	4	1	#NULL!	4072.07	2981.57	#NULL!	#NULL!	3053.32	2560.03	#NULL!	#NULL!	#NULL!	#NULL!	501	501	1	8	8	8	8	8	8	8	8	8	8	8	8	8	8	8	8	8	8	8	8	#NULL!	#NULL!	8
A920970401	A920970	2010	1	1	2	A920	1	67	#NULL!	1	1	2	6	4072.07	1866.49	2488.41	5241.79	2034.74	1772.19	8184.65	2784.35	5718.38	9506.87	501	501	1	2	8	2	8	8	2	8	1	8	1	1	1	2	1	1	2	1	1	1	1	0	0	2
A920970402	A920970	2010	1	1	2	A920	2	66	#NULL!	2	1	1	7	4072.07	1594.49	2288.73	4710.5	1640.79	1755.53	7532.03	2371.43	4667.28	7703.33	501	501	1	2	8	2	8	8	1	2	2	3	1	2	2	8	8	8	8	1	1	1	1	0	1	2
A920970403	A920970	2010	1	1	2	A920	1	42	#NULL!	1	1	4	1	4072.07	4521.68	4791.32	#NULL!	4759.78	6214.99	#NULL!	6056.08	#NULL!	#NULL!	501	501	1	2	8	2	8	8	2	8	1	8	1	1	1	1	1	1	2	2	2	1	2	1	0	1
A920971301	A920971	2010	1	1	2	A920	1	61	#NULL!	4	4	2	5	4072.07	4652.41	3052.91	#NULL!	2204.39	4666.61	#NULL!	3324.37	#NULL!	#NULL!	501	501	1	1	2	2	8	8	2	8	1	8	2	8	1	1	1	1	2	1	1	1	2	1	0	1
A920971302	A920971	2010	1	1	2	A920	2	59	#NULL!	4	4	3	7	4072.07	5776.28	2381.43	#NULL!	2763.9	4281.37	#NULL!	2483.28	#NULL!	#NULL!	501	501	1	2	8	1	2	1	2	8	1	8	1	2	2	8	8	8	8	1	1	1	1	0	0	2
A920971501	A920971	2010	1	1	2	A920	1	79	#NULL!	3	2	4	7	4072.07	3740.1	#NULL!	#NULL!	2209.52	4160.4	#NULL!	#NULL!	#NULL!	#NULL!	501	501	1	2	8	1	3	2	2	8	1	8	2	8	2	8	8	8	8	1	1	1	1	0	0	2
A920972202	A920972	2010	1	1	2	A920	2	30	#NULL!	3	3	4	7	4072.07	8020.22	#NULL!	14193.3	3620.54	5777.88	#NULL!	#NULL!	14115	#NULL!	501	501	1	2	8	8	8	8	2	8	1	8	1	1	1	1	2	2	2	1	1	1	1	0	0	2
A920972203	A920972	2010	1	1	2	A920	2	1	18	3	3	1	#NULL!	4072.07	2740.89	#NULL!	#NULL!	2818.77	3400.11	#NULL!	#NULL!	#NULL!	#NULL!	501	501	1	8	8	8	8	8	8	8	8	8	8	8	8	8	8	8	8	8	8	8	8	#NULL!	#NULL!	8
A920973401	A920973	2010	1	1	2	A920	1	80	#NULL!	3	1	2	7	4072.07	1870.05	#NULL!	#NULL!	2209.52	2080.2	#NULL!	#NULL!	#NULL!	#NULL!	501	501	1	2	8	2	8	8	2	8	1	8	2	8	2	8	8	8	8	1	1	1	1	0	0	2
A920973402	A920973	2010	1	1	2	A920	2	61	#NULL!	2	1	1	7	4072.07	2178.85	4686.91	#NULL!	2178.3	1973.77	#NULL!	4905.63	#NULL!	#NULL!	501	501	1	2	8	2	8	8	2	8	1	8	2	8	2	8	8	8	8	1	1	1	1	0	0	2
A920973901	A920973	2010	1	1	2	A920	1	32	#NULL!	4	4	4	1	4072.07	5718.76	#NULL!	#NULL!	#NULL!	#NULL!	#NULL!	#NULL!	#NULL!	#NULL!	501	501	1	2	8	8	8	8	2	8	1	8	2	8	2	8	8	8	8	1	1	1	1	0	0	2
A920973902	A920973	2010	1	1	2	A920	2	29	#NULL!	4	4	4	1	4072.07	6204.64	#NULL!	7986.61	11615	9619.81	#NULL!	#NULL!	8932.88	#NULL!	501	501	1	2	8	8	8	8	2	8	1	8	2	8	1	1	2	2	2	1	1	1	1	0	0	2
A920975301	A920975	2010	1	1	2	A920	2	55	#NULL!	2	2	4	7	4072.07	5776.28	4762.87	#NULL!	5527.8	4281.37	#NULL!	4966.55	#NULL!	#NULL!	501	501	1	2	8	2	8	8	2	8	1	8	2	8	2	8	8	8	8	1	1	1	1	0	0	2
A920977901	A920977	2010	1	1	2	A920	1	47	#NULL!	4	4	4	1	4072.07	7222.48	5821.43	#NULL!	8673.4	7206.37	#NULL!	7715.42	#NULL!	#NULL!	501	501	1	2	8	2	8	8	2	8	1	8	2	8	2	8	8	8	8	1	1	1	1	0	0	2
A920977902	A920977	2010	1	1	2	A920	2	45	#NULL!	4	4	4	7	4072.07	4337.85	4455	#NULL!	4618.88	3468.15	#NULL!	4740.79	#NULL!	#NULL!	501	501	1	1	2	2	8	8	2	8	1	8	2	8	2	8	8	8	8	1	1	1	1	0	0	2
A920977903	A920977	2010	1	1	2	A920	2	18	#NULL!	4	4	3	7	4072.07	6764.31	#NULL!	5591.81	6224.61	4872.32	#NULL!	#NULL!	8240.87	#NULL!	501	501	1	1	2	8	8	8	8	8	1	8	2	8	1	1	2	1	2	2	1	1	1	0	#NULL!	1
A920977904	A920977	2010	1	1	2	A920	1	13	#NULL!	4	4	1	#NULL!	4072.07	3569.56	#NULL!	6618.14	3224.66	3025.76	#NULL!	#NULL!	7092.29	#NULL!	501	501	1	2	8	8	8	8	8	8	1	8	2	8	2	8	8	8	8	1	1	1	1	0	#NULL!	2
A920979701	A920979	2010	1	1	2	A920	1	55	#NULL!	1	2	3	5	4072.07	3225.61	4130.83	#NULL!	3624.72	3421.42	#NULL!	4633.73	#NULL!	#NULL!	501	501	1	2	8	2	8	8	2	8	1	8	2	8	2	8	8	8	8	1	1	1	1	0	0	2
A920979702	A920979	2010	1	1	2	A920	2	53	#NULL!	1	2	2	2	4072.07	2859.69	3074.07	11807.3	3012.06	2771.24	17310.1	3217.06	13272.6	19599.8	501	501	1	2	8	2	8	8	2	8	1	8	2	8	2	8	8	8	8	1	1	1	1	0	0	2
A920979703	A920979	2010	1	1	2	A920	2	29	#NULL!	1	2	4	7	4072.07	6204.64	#NULL!	7986.61	5807.51	4809.9	#NULL!	#NULL!	8932.88	#NULL!	501	501	1	1	9	8	8	8	2	8	1	8	2	8	1	2	1	1	2	1	1	1	1	0	0	1
A920979704	A920979	2010	1	1	2	A920	2	27	#NULL!	1	2	4	3	4072.07	6204.64	#NULL!	#NULL!	5807.51	4809.9	#NULL!	#NULL!	#NULL!	#NULL!	501	501	1	2	8	8	8	8	2	8	1	8	2	8	2	8	8	8	8	1	1	1	1	0	0	1
A921967901	A921967	2010	1	1	2	A921	1	42	#NULL!	1	2	4	1	3627.02	4564.49	4836.68	#NULL!	4804.84	6273.83	#NULL!	6113.42	#NULL!	#NULL!	501	501	1	2	8	2	8	8	2	8	1	8	2	8	2	8	8	8	8	1	1	1	1	0	0	2
A921967902	A921967	2010	1	1	2	A921	2	40	#NULL!	1	2	4	7	3627.02	4241.65	5398.59	17857.9	4229.51	3951.27	24121.8	5020.98	21575.9	24974	501	501	1	1	2	2	8	8	2	8	1	8	2	8	2	8	8	8	8	1	1	1	1	0	0	2
A921967903	A921967	2010	1	1	2	A921	2	10	#NULL!	1	2	1	#NULL!	3627.02	3202.44	#NULL!	#NULL!	3149.77	3105.99	#NULL!	#NULL!	#NULL!	#NULL!	501	501	1	1	2	8	8	8	8	8	8	8	8	8	2	8	8	8	8	1	2	1	1	0	#NULL!	8
A921967904	A921967	2010	1	1	2	A921	1	8	#NULL!	1	2	1	#NULL!	3627.02	2418.47	#NULL!	#NULL!	2502.97	2466.54	#NULL!	#NULL!	#NULL!	#NULL!	501	501	1	1	2	8	8	8	8	8	8	8	8	8	1	2	2	1	2	1	1	1	1	0	#NULL!	8
A921968301	A921968	2010	1	1	2	A921	1	58	#NULL!	4	4	4	7	3627.02	3256.15	4169.94	#NULL!	4878.71	4605.08	#NULL!	4677.6	#NULL!	#NULL!	501	501	1	2	8	2	8	8	2	8	1	8	2	8	2	8	8	8	8	1	1	1	1	0	0	2
A921968302	A921968	2010	1	1	2	A921	2	54	#NULL!	4	4	3	7	3627.02	2886.76	3103.17	#NULL!	4054.11	3729.96	#NULL!	3247.52	#NULL!	#NULL!	501	501	1	2	8	2	8	8	2	8	1	8	1	1	1	2	1	1	2	1	1	1	1	0	0	2
A921968303	A921968	2010	1	1	2	A921	1	28	#NULL!	4	4	4	1	3627.02	6930.71	#NULL!	10559.8	#NULL!	#NULL!	#NULL!	#NULL!	#NULL!	#NULL!	501	501	1	2	8	8	8	8	2	8	1	8	2	8	1	2	2	1	2	1	1	1	1	0	0	1
A921968304	A921968	2010	1	1	2	A921	2	26	#NULL!	4	4	3	1	3627.02	6263.38	#NULL!	8062.22	7816.66	6473.92	#NULL!	#NULL!	18034.9	#NULL!	501	501	1	2	8	8	8	8	2	8	1	8	2	8	2	8	8	8	8	1	1	1	1	0	0	2
A921968601	A921968	2010	1	1	2	A921	1	51	#NULL!	4	4	4	2	3627.02	5715.79	5552.19	6430.2	6575.92	5832.62	9208.85	6936.33	8012.06	12126.5	501	501	1	2	8	2	8	8	2	8	2	3	2	8	1	2	1	1	2	1	1	1	1	0	0	2
A921968602	A921968	2010	1	1	2	A921	1	23	#NULL!	4	4	3	7	3627.02	6172.77	#NULL!	5870.81	13476.7	14072.5	#NULL!	#NULL!	8541.74	#NULL!	501	501	1	2	8	8	8	8	2	8	1	8	2	8	1	2	2	1	2	1	1	1	1	0	0	1
A921969302	A921969	2010	1	1	2	A921	2	43	#NULL!	3	4	4	7	3627.02	8483.3	10797.2	17857.9	12688.5	15805.1	24121.8	10042	21575.9	24974	501	501	1	2	8	2	8	8	2	8	1	8	2	8	2	8	8	8	8	1	1	1	1	0	0	2
A921969802	A921969	2010	1	1	2	A921	2	11	#NULL!	1	1	1	#NULL!	3627.02	3202.44	#NULL!	#NULL!	3149.77	4658.99	#NULL!	#NULL!	#NULL!	#NULL!	501	501	1	1	9	8	8	8	8	8	8	8	8	8	2	8	8	8	8	1	1	1	1	0	#NULL!	8
A921969803	A921969	2010	1	1	2	A921	2	66	#NULL!	2	1	3	7	3627.02	3219.17	4620.8	6340.13	3312.65	2658.23	10137.8	4787.75	9422.93	10368.3	501	501	1	1	2	2	8	8	2	8	2	3	1	1	1	2	1	1	2	1	1	1	1	0	0	2
A921970202	A921970	2010	1	1	2	A921	2	40	#NULL!	4	4	4	1	3627.02	8483.3	10797.2	#NULL!	4229.51	5268.36	#NULL!	10042	#NULL!	#NULL!	501	501	1	2	8	2	8	8	2	8	1	8	1	1	1	2	1	1	2	1	1	1	1	0	0	2
A921970203	A921970	2010	1	1	2	A921	1	13	#NULL!	4	4	1	#NULL!	3627.02	3603.35	#NULL!	6680.8	3255.19	4072.54	#NULL!	#NULL!	7159.44	#NULL!	501	501	1	2	8	8	8	8	8	8	1	8	2	8	1	2	1	1	2	1	1	1	1	0	#NULL!	1
A921970204	A921970	2010	1	1	2	A921	1	11	#NULL!	4	4	1	#NULL!	3627.02	3603.35	#NULL!	6680.8	3255.19	4072.54	#NULL!	#NULL!	7159.44	#NULL!	501	501	1	1	2	8	8	8	8	8	8	8	8	8	1	1	1	1	2	1	1	1	1	0	#NULL!	8
A921971001	A921971	2010	1	1	2	A921	1	41	#NULL!	3	3	4	1	3627.02	4564.49	4836.68	13226.5	4804.84	6273.83	9856.89	6113.42	15857.9	13696.4	501	501	1	2	8	2	8	8	1	1	1	8	2	8	2	8	8	8	8	1	1	1	1	0	1	1
A921971002	A921971	2010	1	1	2	A921	2	37	#NULL!	3	3	4	7	3627.02	3302.61	#NULL!	#NULL!	3394.31	3353.46	#NULL!	#NULL!	#NULL!	#NULL!	501	501	1	1	2	8	8	8	2	8	1	8	1	1	1	2	1	1	2	1	1	1	1	0	0	2
A921971003	A921971	2010	1	1	2	A921	2	7	#NULL!	3	3	1	#NULL!	3627.02	2185.02	#NULL!	#NULL!	2216.58	2493.34	#NULL!	#NULL!	#NULL!	#NULL!	501	501	1	1	2	8	8	8	8	8	8	8	8	8	1	2	2	1	2	1	1	1	1	0	#NULL!	8
A921971004	A921971	2010	1	1	2	A921	2	5	64	3	3	1	#NULL!	3627.02	2185.02	#NULL!	#NULL!	2216.58	2493.34	#NULL!	#NULL!	#NULL!	#NULL!	501	501	1	2	8	8	8	8	8	8	8	8	8	8	8	8	8	8	8	8	8	8	8	#NULL!	#NULL!	8
A921971501	A921971	2010	1	1	2	A921	1	69	#NULL!	4	4	3	7	3627.02	2512.22	2511.97	#NULL!	2738.68	2385.3	#NULL!	2810.71	#NULL!	#NULL!	501	501	1	2	8	2	8	8	2	8	2	3	1	1	2	8	8	8	8	1	1	1	1	0	0	1
A921971502	A921971	2010	1	1	2	A921	2	64	#NULL!	4	4	1	7	3627.02	2932.63	2365.64	#NULL!	2931.9	2656.61	#NULL!	2476.04	#NULL!	#NULL!	501	501	1	2	8	2	8	8	2	8	1	8	2	8	2	8	8	8	8	1	1	1	1	0	0	2
A921971503	A921971	2010	1	1	2	A921	2	36	#NULL!	4	4	4	1	3627.02	4403.48	#NULL!	22806.3	4525.75	4471.28	#NULL!	#NULL!	20821.7	#NULL!	501	501	1	1	2	8	8	8	2	8	1	8	2	8	1	1	1	1	2	1	1	1	1	0	0	1
A921972201	A921972	2010	1	1	2	A921	1	65	#NULL!	3	2	3	7	3627.02	1884.16	#NULL!	#NULL!	2054.01	1788.97	#NULL!	#NULL!	#NULL!	#NULL!	501	501	1	1	2	2	8	8	2	8	1	8	2	8	1	1	2	1	2	1	1	1	1	0	0	2
A921972202	A921972	2010	1	1	2	A921	2	59	#NULL!	2	2	2	7	3627.02	2915.48	4807.96	#NULL!	2790.07	2160.95	#NULL!	5013.57	#NULL!	#NULL!	501	501	1	1	2	2	8	8	2	8	1	8	1	1	2	8	8	8	8	1	1	1	1	0	0	2
A921972203	A921972	2010	1	1	2	A921	2	32	#NULL!	2	2	4	2	3627.02	4048.08	#NULL!	#NULL!	3654.82	3888.39	#NULL!	#NULL!	#NULL!	#NULL!	501	501	1	1	2	8	8	8	2	8	1	8	2	8	1	1	2	1	2	1	1	1	1	0	0	2
A921972601	A921972	2010	1	1	2	A921	1	63	#NULL!	3	3	2	5	3627.02	2348.23	3081.81	#NULL!	2225.26	2355.39	#NULL!	3355.84	#NULL!	#NULL!	501	501	1	2	8	2	8	8	2	8	1	8	2	8	2	8	8	8	8	1	1	1	1	0	0	2
A921972602	A921972	2010	1	1	2	A921	2	59	#NULL!	3	3	2	7	3627.02	2915.48	2403.98	7248.57	2790.07	2160.95	10966	2506.79	7669.51	11815.5	501	501	1	2	8	2	8	8	2	8	2	3	2	8	1	2	1	1	2	1	1	1	1	0	0	2
A921973101	A921973	2010	1	1	2	A921	1	35	#NULL!	4	4	4	2	3627.02	4744.05	#NULL!	11238.3	5768.87	6389.69	#NULL!	#NULL!	15171.1	#NULL!	501	501	1	2	8	8	8	8	2	8	1	8	2	8	1	2	2	1	2	1	1	1	1	0	0	2
A921973102	A921973	2010	1	1	2	A921	2	36	#NULL!	4	4	4	7	3627.02	3302.61	#NULL!	#NULL!	3394.31	3353.46	#NULL!	#NULL!	#NULL!	#NULL!	501	501	1	2	8	8	8	8	2	8	1	8	2	8	1	2	2	1	2	1	1	1	1	0	0	2
A921973103	A921973	2010	1	1	2	A921	1	8	#NULL!	4	4	1	#NULL!	3627.02	2418.47	#NULL!	#NULL!	2502.97	2466.54	#NULL!	#NULL!	#NULL!	#NULL!	501	501	1	1	2	8	8	8	8	8	8	8	8	8	1	2	2	1	2	1	1	1	1	0	#NULL!	8
A921973104	A921973	2010	1	1	2	A921	2	5	64	4	4	1	#NULL!	3627.02	2185.02	#NULL!	#NULL!	2216.58	2493.34	#NULL!	#NULL!	#NULL!	#NULL!	501	501	1	2	8	8	8	8	8	8	8	8	8	8	8	8	8	8	8	8	8	8	8	#NULL!	#NULL!	8
A921973401	A921973	2010	1	1	2	A921	1	66	#NULL!	2	1	3	7	3627.02	1884.16	#NULL!	#NULL!	2054.01	1788.97	#NULL!	#NULL!	#NULL!	#NULL!	501	501	1	2	8	2	8	8	2	8	2	3	2	8	1	2	1	1	2	1	1	1	1	0	0	2
A921973402	A921973	2010	1	1	2	A921	2	63	#NULL!	2	1	1	7	3627.02	2199.47	4731.28	#NULL!	2198.92	1992.46	#NULL!	4952.07	#NULL!	#NULL!	501	501	1	2	8	2	8	8	2	8	2	3	1	1	2	8	8	8	8	1	1	1	1	0	0	2
A921973403	A921973	2010	1	1	2	A921	2	32	#NULL!	1	1	4	7	3627.02	4048.08	#NULL!	#NULL!	3654.82	3888.39	#NULL!	#NULL!	#NULL!	#NULL!	501	501	1	2	8	8	8	8	2	8	1	8	2	8	1	2	2	1	2	1	1	1	1	0	0	1
A921974201	A921974	2010	1	1	2	A921	1	69	#NULL!	4	4	4	2	3627.02	1884.16	5023.93	7055.22	2054.01	1788.97	11016.2	5621.42	7696.69	12795.8	501	501	1	2	8	2	8	8	2	8	1	8	2	8	1	2	2	1	2	1	1	1	1	0	0	2
A921974202	A921974	2010	1	1	2	A921	2	63	#NULL!	4	4	3	7	3627.02	2199.47	#NULL!	#NULL!	2198.92	1992.46	#NULL!	#NULL!	#NULL!	#NULL!	501	501	1	2	8	1	2	2	2	8	2	3	2	8	2	8	8	8	8	1	1	1	1	0	0	2
A921975903	A921975	2010	1	1	2	A921	1	10	#NULL!	4	4	#NULL!	#NULL!	3627.02	3603.35	#NULL!	#NULL!	#NULL!	#NULL!	#NULL!	#NULL!	#NULL!	#NULL!	501	501	1	2	8	8	8	8	8	8	8	8	8	8	2	8	8	8	8	1	1	1	1	0	#NULL!	8
A921975904	A921975	2010	1	1	2	A921	1	7	#NULL!	4	4	#NULL!	#NULL!	3627.02	2418.47	#NULL!	#NULL!	#NULL!	#NULL!	#NULL!	#NULL!	#NULL!	#NULL!	501	501	1	2	8	8	8	8	8	8	8	8	8	8	2	8	8	8	8	1	1	1	1	0	#NULL!	8
A921976603	A921976	2010	1	1	2	A921	2	6	80	4	4	1	#NULL!	3627.02	2185.02	#NULL!	#NULL!	2216.58	2493.34	#NULL!	#NULL!	#NULL!	#NULL!	501	501	1	2	8	8	8	8	8	8	8	8	8	8	2	8	8	8	8	1	1	1	1	0	#NULL!	8
A921976604	A921976	2010	1	1	2	A921	1	64	#NULL!	4	4	4	7	3627.02	2348.23	3081.81	#NULL!	2225.26	2355.39	#NULL!	3355.84	#NULL!	#NULL!	501	501	1	2	8	2	8	8	2	8	2	3	2	8	2	8	8	8	8	1	1	1	1	0	0	2
A921976605	A921976	2010	1	1	2	A921	2	60	#NULL!	4	4	3	7	3627.02	2199.47	2365.64	#NULL!	2198.92	1992.46	#NULL!	2476.04	#NULL!	#NULL!	501	501	1	2	8	2	8	8	2	8	1	8	2	8	2	8	8	8	8	1	1	1	1	0	0	2
A921978201	A921978	2010	1	1	2	A921	1	37	#NULL!	4	4	4	1	3627.02	4744.05	#NULL!	#NULL!	5768.87	6389.69	#NULL!	#NULL!	#NULL!	#NULL!	501	501	1	2	8	8	8	8	2	8	1	8	2	8	2	8	8	8	8	1	1	1	1	0	0	2
A921978202	A921978	2010	1	1	2	A921	2	32	#NULL!	4	4	4	7	3627.02	4048.08	#NULL!	#NULL!	3654.82	3888.39	#NULL!	#NULL!	#NULL!	#NULL!	501	501	1	1	2	8	8	8	2	8	1	8	2	8	1	1	2	2	1	1	1	1	1	0	0	2
A921978203	A921978	2010	1	1	2	A921	2	5	65	3	4	1	#NULL!	3627.02	2185.02	#NULL!	#NULL!	2216.58	2493.34	#NULL!	#NULL!	#NULL!	#NULL!	501	501	1	2	8	8	8	8	8	8	8	8	8	8	8	8	8	8	8	8	8	8	8	#NULL!	#NULL!	8
A921978204	A921978	2010	1	1	2	A921	1	2	27	4	4	1	#NULL!	3627.02	3009.79	#NULL!	#NULL!	3082.22	2584.26	#NULL!	#NULL!	#NULL!	#NULL!	501	501	1	8	8	8	8	8	8	8	8	8	8	8	8	8	8	8	8	8	8	8	8	#NULL!	#NULL!	8
A921979202	A921979	2010	1	1	2	A921	2	40	#NULL!	3	4	4	7	3627.02	8483.3	10797.2	#NULL!	5639.35	15805.1	#NULL!	10042	#NULL!	#NULL!	501	501	1	2	8	2	8	8	2	8	1	8	2	8	2	8	8	8	8	1	1	1	1	0	0	2
A922963801	A922963	2010	1	1	2	A922	1	53	#NULL!	4	4	4	1	3883.96	7200.83	6994.71	16201.7	8284.42	11022	23202.8	8738.47	30281.1	30554.1	501	501	1	2	8	1	2	2	2	8	1	8	2	8	1	1	1	1	2	1	1	1	1	0	0	2
A922963802	A922963	2010	1	1	2	A922	2	49	#NULL!	4	4	3	7	3883.96	5516.61	5665.6	#NULL!	5874.01	6615.88	#NULL!	6029.05	#NULL!	#NULL!	501	501	1	2	8	2	8	8	2	8	1	8	2	8	2	8	8	8	8	1	1	1	1	0	0	2
A922964301	A922964	2010	1	1	2	A922	1	63	#NULL!	4	4	3	7	3883.96	3944.44	#NULL!	8664.84	2803.41	3956.47	#NULL!	#NULL!	9605.67	#NULL!	501	501	1	2	8	1	1	2	2	8	3	3	1	1	2	8	8	8	8	1	1	1	1	0	0	2
A922964302	A922964	2010	1	1	2	A922	2	58	#NULL!	4	4	2	7	3883.96	4897.28	6057.13	#NULL!	3514.96	3629.85	#NULL!	6316.16	#NULL!	#NULL!	501	501	1	2	8	2	8	8	2	8	1	8	2	8	2	8	8	8	8	1	1	1	1	0	0	2
A922964303	A922964	2010	1	1	2	A922	1	35	#NULL!	4	4	4	2	3883.96	7968.82	#NULL!	14158.1	7267.7	10733.1	#NULL!	#NULL!	19112.7	#NULL!	501	501	1	2	8	8	8	8	2	8	1	8	2	8	2	8	8	8	8	1	1	1	1	0	0	2
A922965001	A922965	2010	1	1	2	A922	1	68	#NULL!	4	3	2	5	3883.96	3560.54	3164.61	#NULL!	3881.5	3380.65	#NULL!	3540.97	#NULL!	#NULL!	501	501	1	2	8	2	8	8	2	8	1	8	1	1	2	8	8	8	8	1	1	1	1	0	0	2
A922965002	A922965	2010	1	1	2	A922	2	64	#NULL!	4	3	1	7	3883.96	4156.39	2980.26	19626.2	4155.34	3765.19	23002.8	3119.34	18946.5	23212.7	501	501	1	2	8	1	1	1	1	2	1	8	2	8	1	1	2	1	2	1	2	2	1	0	1	2
A922966302	A922966	2010	1	1	2	A922	2	60	#NULL!	#NULL!	#NULL!	1	7	3883.96	8312.77	5960.52	#NULL!	#NULL!	#NULL!	#NULL!	#NULL!	#NULL!	#NULL!	501	501	1	2	8	2	8	8	1	9	1	8	1	1	2	8	8	8	8	1	1	1	1	0	1	2
A922966701	A922966	2010	1	1	2	A922	1	46	#NULL!	3	4	3	5	3883.96	9185.11	7403.33	#NULL!	11030.3	9164.62	#NULL!	9812	#NULL!	#NULL!	501	501	1	2	8	2	8	8	2	8	1	8	2	8	1	1	2	1	1	1	1	1	1	0	0	2
A922966702	A922966	2010	1	1	2	A922	2	46	#NULL!	3	4	3	7	3883.96	5516.61	5665.6	#NULL!	5874.01	4410.59	#NULL!	6029.05	#NULL!	#NULL!	501	501	1	2	8	1	3	2	2	8	1	8	2	8	2	8	8	8	8	1	1	1	1	0	0	2
A922966703	A922966	2010	1	1	2	A922	2	19	#NULL!	4	4	3	1	3883.96	8602.44	#NULL!	#NULL!	7916.08	6196.32	#NULL!	#NULL!	#NULL!	#NULL!	501	501	1	2	8	8	8	8	2	8	1	8	2	8	2	8	8	8	8	1	1	1	1	0	0	1
A922966704	A922966	2010	1	1	2	A922	2	16	#NULL!	4	4	2	7	3883.96	8602.44	#NULL!	#NULL!	7916.08	6196.32	#NULL!	#NULL!	#NULL!	#NULL!	501	501	1	2	8	8	8	8	8	8	1	8	2	8	2	8	8	8	8	1	1	1	1	0	#NULL!	1
A922967301	A922967	2010	1	1	2	A922	1	53	#NULL!	4	4	3	3	3883.96	7200.83	6994.71	#NULL!	12426.6	11022	#NULL!	8738.47	#NULL!	#NULL!	501	501	1	1	9	2	8	8	2	8	1	8	2	8	1	1	2	2	2	1	1	1	1	0	0	2
A922967302	A922967	2010	1	1	2	A922	2	50	#NULL!	4	4	3	7	3883.96	3636.78	3909.42	#NULL!	5745.84	5286.43	#NULL!	4091.26	#NULL!	#NULL!	501	501	1	2	8	2	8	8	2	8	1	8	2	8	1	1	1	1	1	1	1	1	1	0	0	2
A922967303	A922967	2010	1	1	2	A922	1	25	#NULL!	4	4	4	3	3883.96	8731.4	#NULL!	19955.1	#NULL!	#NULL!	#NULL!	#NULL!	#NULL!	#NULL!	501	501	1	2	8	8	8	8	2	8	1	8	2	8	2	8	8	8	8	1	1	1	1	0	0	2
A922968002	A922968	2010	1	1	2	A922	2	51	#NULL!	4	4	3	7	3883.96	3636.78	3909.42	#NULL!	3830.56	3524.29	#NULL!	4091.26	#NULL!	#NULL!	501	501	1	2	8	2	8	8	2	8	1	8	2	8	2	8	8	8	8	1	1	1	1	0	0	2
A922968003	A922968	2010	1	1	2	A922	2	26	#NULL!	4	4	4	2	3883.96	7890.69	#NULL!	15235.3	7385.64	6116.94	#NULL!	#NULL!	17040.4	#NULL!	501	501	1	2	8	8	8	8	2	8	1	8	2	8	2	8	8	8	8	1	1	1	1	0	0	1
A922968004	A922968	2010	1	1	2	A922	1	25	#NULL!	4	4	3	3	3883.96	8731.4	#NULL!	#NULL!	10216.7	11161.3	#NULL!	#NULL!	#NULL!	#NULL!	501	501	1	2	8	8	8	8	2	8	1	8	2	8	1	2	1	1	2	2	1	1	1	0	0	2
A922968601	A922968	2010	1	1	2	A922	1	71	#NULL!	4	3	4	1	3883.96	2120.57	3412.3	#NULL!	2297.95	2132.09	#NULL!	3394.33	#NULL!	#NULL!	501	501	1	2	8	2	8	8	2	8	1	8	1	2	2	8	8	8	8	1	1	1	1	0	0	2
A922968602	A922968	2010	1	1	2	A922	2	69	#NULL!	4	3	3	7	3883.96	2027.78	2910.67	7987.37	2086.66	2232.58	12771.7	3015.84	7914.08	13062.2	501	501	1	2	8	2	8	8	2	8	1	8	2	8	2	8	8	8	8	1	1	1	1	0	0	2
A922968901	A922968	2010	1	1	2	A922	1	47	#NULL!	#NULL!	#NULL!	3	2	3883.96	9185.11	11105	#NULL!	#NULL!	#NULL!	#NULL!	#NULL!	#NULL!	#NULL!	501	501	1	2	8	2	8	8	2	8	1	8	2	8	2	8	8	8	8	1	1	1	1	0	0	2
A922968902	A922968	2010	1	1	2	A922	2	47	#NULL!	#NULL!	#NULL!	3	2	3883.96	5516.61	8498.4	#NULL!	#NULL!	#NULL!	#NULL!	#NULL!	#NULL!	#NULL!	501	501	1	1	2	2	8	8	2	8	2	3	2	8	1	1	2	1	1	2	1	1	2	1	0	2
A922968905	A922968	2010	1	1	2	A922	2	71	#NULL!	#NULL!	#NULL!	1	7	3883.96	2670.52	#NULL!	#NULL!	11502.9	11495.3	#NULL!	#NULL!	#NULL!	#NULL!	501	501	1	2	8	1	3	2	2	8	1	8	1	1	2	8	8	8	8	1	1	1	1	0	0	2
A922969801	A922969	2010	1	1	2	A922	1	47	#NULL!	3	4	4	2	3883.96	9185.11	#NULL!	18438.4	11030.3	9164.62	#NULL!	#NULL!	22152	#NULL!	501	501	1	2	8	2	8	8	2	8	1	8	2	8	2	8	8	8	8	1	1	1	1	0	0	2
A922969802	A922969	2010	1	1	2	A922	2	47	#NULL!	3	4	4	7	3883.96	5516.61	11331.2	#NULL!	5874.01	4410.59	#NULL!	12058.1	#NULL!	#NULL!	501	501	1	2	8	2	8	8	2	8	1	8	2	8	2	8	8	8	8	1	1	1	1	0	0	2
A922969803	A922969	2010	1	1	2	A922	1	18	#NULL!	3	4	2	7	3883.96	5209.03	#NULL!	21850.8	5648.68	7680.92	#NULL!	#NULL!	16119.3	#NULL!	501	501	1	2	8	8	8	8	8	8	1	8	2	8	2	8	8	8	8	1	1	1	1	0	#NULL!	1
A922969804	A922969	2010	1	1	2	A922	1	16	#NULL!	3	4	2	7	3883.96	5209.03	#NULL!	#NULL!	5648.68	7680.92	#NULL!	#NULL!	#NULL!	#NULL!	501	501	1	2	8	8	8	8	8	8	1	8	2	8	1	2	2	2	1	1	1	1	1	0	#NULL!	1
A922971002	A922971	2010	1	1	2	A922	2	54	#NULL!	3	3	4	1	3883.96	5455.17	#NULL!	#NULL!	5745.84	5286.43	#NULL!	#NULL!	#NULL!	#NULL!	501	501	1	2	8	2	8	8	2	8	1	8	2	8	2	8	8	8	8	1	1	1	1	0	0	2
A922971003	A922971	2010	1	1	2	A922	2	22	#NULL!	3	3	3	2	3883.96	7348.13	#NULL!	#NULL!	9365.66	10478.3	#NULL!	#NULL!	#NULL!	#NULL!	501	501	1	2	8	8	8	8	2	8	1	8	2	8	1	1	1	1	1	1	1	1	1	0	0	1
A922971501	A922971	2010	1	1	2	A922	1	56	#NULL!	4	4	4	1	3883.96	5469.51	#NULL!	#NULL!	4609.69	5801.54	#NULL!	#NULL!	#NULL!	#NULL!	501	501	1	2	8	1	3	2	1	2	1	8	2	8	2	8	8	8	8	1	1	1	1	0	1	2
A922971502	A922971	2010	1	1	2	A922	2	55	#NULL!	4	4	3	3	3883.96	4897.28	6057.13	9131.83	3514.96	3629.85	13815.1	6316.16	9662.15	14885.3	501	501	1	1	1	2	8	8	1	2	2	9	2	8	1	1	2	2	1	2	2	2	2	1	1	2
A922971503	A922971	2010	1	1	2	A922	1	29	#NULL!	4	4	3	2	3883.96	11641.9	#NULL!	13303.4	10216.7	14881.8	#NULL!	#NULL!	16383.1	#NULL!	501	501	1	2	8	8	8	8	2	8	1	8	2	8	2	8	8	8	8	1	1	1	1	0	0	1
A922972102	A922972	2010	1	1	2	A922	2	50	#NULL!	2	3	2	6	3883.96	3636.78	3909.42	#NULL!	5745.84	5286.43	#NULL!	4091.26	#NULL!	#NULL!	501	501	1	2	8	2	8	8	2	8	1	8	2	8	1	1	2	2	1	2	2	2	2	1	0	2
A922972104	A922972	2010	1	1	2	A922	2	24	#NULL!	2	3	4	2	3883.96	4898.75	#NULL!	15713	9365.66	10478.3	#NULL!	#NULL!	18999.2	#NULL!	501	501	1	2	8	8	8	8	2	8	1	8	2	8	1	2	1	1	2	1	1	1	1	0	0	1
A922972801	A922972	2010	1	1	2	A922	1	63	#NULL!	1	2	2	5	3883.96	4437.49	3882.5	#NULL!	2803.41	4451.03	#NULL!	4227.73	#NULL!	#NULL!	501	501	1	1	9	2	8	8	2	8	1	8	2	8	1	1	2	1	1	1	1	1	1	0	0	2
A922972802	A922972	2010	1	1	2	A922	2	56	#NULL!	1	2	1	7	3883.96	5509.44	3028.56	#NULL!	3514.96	4083.58	#NULL!	3158.08	#NULL!	#NULL!	501	501	1	2	8	2	8	8	2	8	1	8	2	8	2	8	8	8	8	1	1	1	1	0	0	2
A922973601	A922973	2010	1	1	2	A922	1	73	#NULL!	3	1	4	7	3883.96	2120.57	#NULL!	#NULL!	2297.95	2132.09	#NULL!	#NULL!	#NULL!	#NULL!	501	501	1	2	8	2	8	8	2	8	1	8	2	8	2	8	8	8	8	1	1	1	1	0	0	2
A922973602	A922973	2010	1	1	2	A922	2	72	#NULL!	3	1	2	7	3883.96	2670.52	8685.42	#NULL!	2300.57	2299.05	#NULL!	9353.16	#NULL!	#NULL!	501	501	1	2	8	1	3	1	2	8	1	8	2	8	1	1	2	1	1	1	1	1	1	0	0	2
A922974501	A922974	2010	1	1	2	A922	1	39	#NULL!	4	4	3	1	3883.96	5976.61	#NULL!	21237.2	7267.7	8049.81	#NULL!	#NULL!	19112.7	#NULL!	501	501	1	2	8	8	8	8	2	8	1	8	2	8	2	8	8	8	8	1	1	1	1	0	0	2
A922974502	A922974	2010	1	1	2	A922	2	39	#NULL!	4	4	3	2	3883.96	4160.67	#NULL!	#NULL!	4276.2	4224.73	#NULL!	#NULL!	#NULL!	#NULL!	501	501	1	2	8	8	8	8	2	8	1	8	2	8	2	8	8	8	8	1	1	1	1	0	0	2
A922974503	A922974	2010	1	1	2	A922	2	11	#NULL!	4	4	1	#NULL!	3883.96	4034.47	#NULL!	7109.06	3968.12	3912.96	#NULL!	#NULL!	8033.33	#NULL!	501	501	1	2	8	8	8	8	8	8	8	8	8	8	2	8	8	8	8	1	1	1	1	0	#NULL!	8
A922974504	A922974	2010	1	1	2	A922	2	7	#NULL!	4	4	1	#NULL!	3883.96	2752.72	#NULL!	#NULL!	2792.47	3141.14	#NULL!	#NULL!	#NULL!	#NULL!	501	501	1	2	8	8	8	8	8	8	8	8	8	8	2	8	8	8	8	1	1	1	1	0	#NULL!	8
A922974505	A922974	2010	1	1	2	A922	2	6	76	4	4	1	#NULL!	3883.96	2752.72	#NULL!	#NULL!	2792.47	3141.14	#NULL!	#NULL!	#NULL!	#NULL!	501	501	1	2	8	8	8	8	8	8	8	8	8	8	2	8	8	8	8	1	1	1	1	0	#NULL!	8
A922974506	A922974	2010	1	1	2	A922	2	62	#NULL!	4	4	1	7	3883.96	2770.92	2980.26	#NULL!	2770.23	2510.12	#NULL!	3119.34	#NULL!	#NULL!	501	501	1	2	8	2	8	8	2	8	1	8	2	8	1	1	2	2	1	1	1	1	1	0	0	2
A922976201	A922976	2010	1	1	2	A922	1	50	#NULL!	3	4	4	#NULL!	3883.96	7200.83	6994.71	#NULL!	12426.6	11022	#NULL!	8738.47	#NULL!	#NULL!	501	501	1	2	8	2	8	8	2	8	2	3	1	3	1	2	2	2	1	1	2	1	2	1	0	2
A922976202	A922976	2010	1	1	2	A922	2	47	#NULL!	3	4	4	7	3883.96	5516.61	5665.6	14317.3	8811.01	6615.88	22518.4	6029.05	19859.4	25030.3	501	501	1	2	8	1	3	2	2	8	1	8	2	8	2	8	8	8	8	1	1	1	1	0	0	2
A922976204	A922976	2010	1	1	2	A922	2	17	#NULL!	4	4	2	7	3883.96	8602.44	#NULL!	#NULL!	#NULL!	#NULL!	#NULL!	#NULL!	#NULL!	#NULL!	501	501	1	2	8	8	8	8	8	8	1	8	2	8	2	8	8	8	8	1	1	1	1	0	#NULL!	1
A922976603	A922976	2010	1	1	2	A922	1	26	#NULL!	4	4	4	3	3883.96	15988.7	#NULL!	#NULL!	#NULL!	#NULL!	#NULL!	#NULL!	#NULL!	#NULL!	501	501	1	1	1	8	8	8	2	8	1	8	2	8	2	8	8	8	8	1	1	1	1	0	0	1
A922976604	A922976	2010	1	1	2	A922	2	21	#NULL!	4	4	3	7	3883.96	9797.51	#NULL!	#NULL!	#NULL!	#NULL!	#NULL!	#NULL!	#NULL!	#NULL!	501	501	1	2	8	8	8	8	2	8	2	3	1	1	1	1	2	2	1	1	1	1	1	0	0	1
A922978601	A922978	2010	1	1	2	A922	1	42	#NULL!	3	3	4	1	3883.96	5750.4	6093.31	#NULL!	#NULL!	#NULL!	#NULL!	#NULL!	#NULL!	#NULL!	501	501	1	2	8	2	8	8	2	8	1	8	2	8	2	8	8	8	8	1	1	1	1	0	0	2
A922978602	A922978	2010	1	1	2	A922	2	38	#NULL!	3	3	4	7	3883.96	4160.67	#NULL!	14365.8	8552.4	5632.97	#NULL!	#NULL!	13115.7	#NULL!	501	501	1	2	8	8	8	8	2	8	1	8	2	8	1	1	1	1	2	1	1	1	1	0	0	2
A922978603	A922978	2010	1	1	2	A922	2	9	#NULL!	3	3	1	#NULL!	3883.96	2752.72	#NULL!	#NULL!	2792.47	4188.19	#NULL!	#NULL!	#NULL!	#NULL!	501	501	1	2	8	8	8	8	8	8	8	8	8	8	2	8	8	8	8	1	1	1	1	0	#NULL!	8
A922978604	A922978	2010	1	1	2	A922	1	6	83	3	3	1	#NULL!	3883.96	3046.82	#NULL!	#NULL!	3153.28	4143.17	#NULL!	#NULL!	#NULL!	#NULL!	501	501	1	2	8	8	8	8	8	8	8	8	8	8	2	8	8	8	8	1	1	1	1	0	#NULL!	8
A922979501	A922979	2010	1	1	2	A922	1	37	#NULL!	1	2	4	2	3883.96	5976.61	#NULL!	#NULL!	7267.7	8049.81	#NULL!	#NULL!	#NULL!	#NULL!	501	501	1	2	8	8	8	8	2	8	1	8	2	8	1	1	1	1	1	1	1	1	1	0	0	2
A922979502	A922979	2010	1	1	2	A922	2	37	#NULL!	1	2	3	7	3883.96	4160.67	#NULL!	#NULL!	4276.2	4224.73	#NULL!	#NULL!	#NULL!	#NULL!	501	501	1	2	8	8	8	8	2	8	1	8	1	2	2	8	8	8	8	1	1	1	1	0	0	2
A922979503	A922979	2010	1	1	2	A922	1	3	41	2	2	1	#NULL!	3883.96	3791.78	#NULL!	#NULL!	3883.02	3255.69	#NULL!	#NULL!	#NULL!	#NULL!	501	501	1	8	8	8	8	8	8	8	8	8	8	8	8	8	8	8	8	8	8	8	8	#NULL!	#NULL!	8
A923971201	A923971	2010	1	1	1	A923	2	22	#NULL!	1	1	3	7	6827.2	6697.44	#NULL!	#NULL!	16496	19100.8	#NULL!	#NULL!	#NULL!	#NULL!	512	517	1	2	8	8	8	8	2	8	1	8	2	8	2	8	8	8	8	1	1	1	1	0	0	1
A923971301	A923971	2010	1	1	1	A923	1	24	#NULL!	1	1	3	7	6827.2	10631.9	#NULL!	10111.8	19634.5	24238.2	#NULL!	#NULL!	14712.1	#NULL!	512	517	1	1	9	8	8	8	2	8	1	8	2	8	1	2	1	1	2	1	1	1	1	0	0	2
A923972101	A923972	2010	1	1	1	A923	1	38	#NULL!	1	2	3	5	6827.2	8171.06	#NULL!	19356.6	#NULL!	#NULL!	#NULL!	#NULL!	#NULL!	#NULL!	512	517	1	2	8	8	8	8	2	8	1	8	1	1	1	1	1	1	2	1	1	2	1	0	0	2
A923972103	A923972	2010	1	1	1	A923	1	8	#NULL!	2	2	1	#NULL!	6827.2	4165.52	#NULL!	#NULL!	#NULL!	#NULL!	#NULL!	#NULL!	#NULL!	#NULL!	512	517	1	2	8	8	8	8	8	8	8	8	8	8	2	8	8	8	8	1	1	1	1	0	#NULL!	8
A923972104	A923972	2010	1	1	1	A923	1	8	#NULL!	2	2	1	#NULL!	6827.2	4165.52	#NULL!	#NULL!	#NULL!	#NULL!	#NULL!	#NULL!	#NULL!	#NULL!	512	517	1	2	8	8	8	8	8	8	8	8	8	8	1	2	1	1	2	1	2	1	1	0	#NULL!	8
A923972601	A923972	2010	1	1	1	A923	2	61	#NULL!	1	1	2	7	6827.2	3788.33	4074.53	8944.12	3787.38	3431.77	15724.4	4264.67	8634.38	15867.8	512	517	1	2	8	2	8	8	2	8	1	8	2	8	1	2	2	1	2	1	1	1	1	0	0	2
A923972801	A923972	2010	1	1	1	A923	1	59	#NULL!	2	3	3	7	6827.2	5608.32	7182.23	11884.3	6302.25	5948.77	18445.2	8056.6	12717	21196.7	512	517	1	2	8	2	8	8	2	8	1	8	2	8	2	8	8	8	8	1	1	1	1	0	0	2
A923972802	A923972	2010	1	1	1	A923	2	58	#NULL!	3	3	2	7	6827.2	5021.57	4140.57	#NULL!	4805.56	3721.98	#NULL!	4317.64	#NULL!	#NULL!	512	517	1	2	8	2	8	8	2	8	1	8	2	8	2	8	8	8	8	1	1	1	1	0	0	2
A923972803	A923972	2010	1	1	1	A923	1	32	#NULL!	3	3	4	7	6827.2	9943.13	#NULL!	#NULL!	16291.2	14179	#NULL!	#NULL!	#NULL!	#NULL!	512	517	1	2	8	8	8	8	2	8	1	8	1	1	1	2	1	1	2	1	1	1	1	0	0	2
A923973601	A923973	2010	1	1	1	A923	1	33	#NULL!	4	4	4	1	6827.2	9943.13	#NULL!	13761.2	16291.2	14179	#NULL!	#NULL!	21420.9	#NULL!	512	517	1	2	8	8	8	8	2	8	1	8	2	8	2	8	8	8	8	1	1	1	1	0	0	1
A923973702	A923973	2010	1	1	1	A923	2	33	#NULL!	1	2	3	1	6827.2	6972.33	#NULL!	#NULL!	6294.99	6697.28	#NULL!	#NULL!	#NULL!	#NULL!	512	517	1	2	8	8	8	8	2	8	1	8	2	8	1	2	1	1	2	1	1	1	1	0	0	2
A923973703	A923973	2010	1	1	1	A923	1	2	30	2	2	1	#NULL!	6827.2	5184.01	#NULL!	#NULL!	5308.76	4451.09	#NULL!	#NULL!	#NULL!	#NULL!	512	517	1	8	8	8	8	8	8	8	8	8	8	8	8	8	8	8	8	8	8	8	8	#NULL!	#NULL!	8
A923974901	A923974	2010	1	1	1	A923	1	66	#NULL!	3	2	1	7	6827.2	3245.25	4326.56	18227.6	#NULL!	#NULL!	18974.1	#NULL!	#NULL!	#NULL!	512	517	1	2	8	1	3	2	2	8	1	8	2	8	2	8	8	8	8	1	1	1	1	0	0	2
A923974902	A923974	2010	1	1	1	A923	2	61	#NULL!	2	2	1	7	6827.2	3788.33	4074.53	#NULL!	11362.1	10295.3	#NULL!	8529.35	#NULL!	#NULL!	512	517	1	2	8	2	8	8	2	8	1	8	1	1	2	8	8	8	8	1	1	1	1	0	0	2
A923974903	A923974	2010	1	1	1	A923	1	29	#NULL!	1	2	4	1	6827.2	11937.3	#NULL!	#NULL!	#NULL!	#NULL!	#NULL!	#NULL!	#NULL!	#NULL!	512	517	1	1	9	8	8	8	2	8	1	8	2	8	1	2	1	1	1	1	1	1	1	0	0	2
A923975001	A923975	2010	1	1	1	A923	1	77	#NULL!	1	1	1	7	6827.2	3251.43	#NULL!	#NULL!	3841.66	3616.81	#NULL!	#NULL!	#NULL!	#NULL!	512	517	1	2	8	2	8	8	2	8	3	3	2	8	1	2	1	1	2	1	1	1	1	0	0	2
A923975002	A923975	2010	1	1	1	A923	2	75	#NULL!	1	1	1	7	6827.2	4041.8	#NULL!	#NULL!	4067.41	4466.82	#NULL!	#NULL!	#NULL!	#NULL!	512	517	1	2	8	1	3	2	2	8	2	3	2	8	2	8	8	8	8	1	1	1	1	0	0	2
A923975701	A923975	2010	1	1	1	A923	1	59	#NULL!	4	4	2	5	6827.2	8412.49	7182.23	17826.4	9453.37	8923.16	18445.2	8056.6	19075.5	21196.7	512	517	1	2	8	2	8	8	2	8	1	8	2	8	2	8	8	8	8	1	1	1	1	0	0	2
A923975702	A923975	2010	1	1	1	A923	2	57	#NULL!	4	4	2	7	6827.2	7532.35	4140.57	#NULL!	7208.34	5582.96	#NULL!	4317.64	#NULL!	#NULL!	512	517	1	2	8	2	8	8	2	8	1	8	2	8	2	8	8	8	8	1	1	1	1	0	0	2
A923976401	A923976	2010	1	1	1	A923	1	60	#NULL!	4	4	2	1	6827.2	4044.54	5308.04	#NULL!	3832.75	4056.88	#NULL!	5780.04	#NULL!	#NULL!	512	517	1	2	8	2	8	8	2	8	1	8	2	8	2	8	8	8	8	1	1	1	1	0	0	2
A923976402	A923976	2010	1	1	1	A923	2	56	#NULL!	4	4	1	3	6827.2	5021.57	4140.57	18727.2	4805.56	3721.98	18887.7	4317.64	19814.7	20350.8	512	517	1	1	2	2	8	8	2	8	1	8	2	8	2	8	8	8	8	1	1	1	1	0	0	2
A923976403	A923976	2010	1	1	1	A923	1	30	#NULL!	4	4	4	3	6827.2	9943.13	#NULL!	#NULL!	16291.2	14179	#NULL!	#NULL!	#NULL!	#NULL!	512	517	1	2	8	8	8	8	2	8	1	8	2	8	2	8	8	8	8	1	1	1	1	0	0	2
A923977201	A923977	2010	1	1	1	A923	1	33	#NULL!	1	2	3	3	6827.2	9943.13	#NULL!	#NULL!	#NULL!	#NULL!	#NULL!	#NULL!	#NULL!	#NULL!	512	517	1	2	8	8	8	8	2	8	1	8	2	8	2	8	8	8	8	1	1	1	1	0	0	2
A923977202	A923977	2010	1	1	1	A923	2	31	#NULL!	1	2	3	7	6827.2	6972.33	#NULL!	24677.6	12590	8929.71	#NULL!	#NULL!	24541.6	#NULL!	512	517	1	2	8	8	8	8	2	8	1	8	2	8	2	8	8	8	8	1	1	1	1	0	0	2
A923977203	A923977	2010	1	1	1	A923	2	3	41	1	2	1	#NULL!	6827.2	4765.56	#NULL!	#NULL!	4900.95	5254.87	#NULL!	#NULL!	#NULL!	#NULL!	512	517	1	8	8	8	8	8	8	8	8	8	8	8	8	8	8	8	8	8	8	8	8	#NULL!	#NULL!	8
A923977204	A923977	2010	1	1	1	A923	2	1	14	1	2	1	#NULL!	6827.2	4765.56	#NULL!	#NULL!	4900.95	5254.87	#NULL!	#NULL!	#NULL!	#NULL!	512	517	1	8	8	8	8	8	8	8	8	8	8	8	8	8	8	8	8	8	8	8	8	#NULL!	#NULL!	8
A923977401	A923977	2010	1	1	1	A923	1	72	#NULL!	3	1	1	7	6827.2	2899.18	#NULL!	59319.5	3141.7	2914.93	#NULL!	#NULL!	60765.2	#NULL!	512	517	1	1	9	2	8	8	2	8	1	8	2	8	1	1	1	1	2	1	1	1	1	0	0	2
A923977402	A923977	2010	1	1	1	A923	2	67	#NULL!	3	1	1	7	6827.2	2772.32	#NULL!	#NULL!	2852.82	3052.32	#NULL!	#NULL!	#NULL!	#NULL!	512	517	1	2	8	2	8	8	2	8	2	3	1	2	2	8	8	8	8	1	1	1	1	0	0	2
A923978801	A923978	2010	1	1	1	A923	1	53	#NULL!	2	3	1	5	6827.2	16105.9	19126	#NULL!	11326.2	13394.7	#NULL!	23894	#NULL!	#NULL!	512	517	1	2	8	2	8	8	2	8	1	8	1	1	2	8	8	8	8	1	1	1	1	0	0	2
A923978803	A923978	2010	1	1	1	A923	2	18	#NULL!	2	3	3	7	6827.2	11761	#NULL!	#NULL!	10822.6	11295.2	#NULL!	#NULL!	#NULL!	#NULL!	512	517	1	2	8	8	8	8	8	8	1	8	2	8	2	8	8	8	8	1	1	1	1	0	#NULL!	1
A923978804	A923978	2010	1	1	1	A923	2	17	#NULL!	2	3	2	7	6827.2	11761	#NULL!	19444.8	10822.6	11295.2	#NULL!	#NULL!	28656.6	#NULL!	512	517	1	2	8	8	8	8	8	8	1	8	2	8	2	8	8	8	8	1	1	1	1	0	#NULL!	2
A924966401	A924966	2010	1	1	2	A924	1	80	#NULL!	4	3	1	6	3389.51	3943.37	#NULL!	#NULL!	4659.21	4386.51	#NULL!	#NULL!	#NULL!	#NULL!	501	501	1	2	8	1	3	2	2	8	3	3	1	2	1	2	2	2	1	2	2	2	2	1	0	2
A924966402	A924966	2010	1	1	2	A924	2	80	#NULL!	4	3	1	7	3389.51	4901.93	#NULL!	#NULL!	4933	5417.41	#NULL!	#NULL!	#NULL!	#NULL!	501	501	1	2	8	2	8	8	2	8	1	8	2	8	2	8	8	8	8	1	1	1	1	0	0	2
A924966901	A924966	2010	1	1	2	A924	1	41	#NULL!	3	4	4	2	3389.51	4767.42	5051.72	13814.5	5018.46	6552.77	10295.1	6385.22	24844.4	14305.4	501	501	1	2	8	2	8	8	2	8	1	8	2	8	2	8	8	8	8	1	1	1	1	0	0	2
A924966902	A924966	2010	1	1	2	A924	2	39	#NULL!	3	4	3	7	3389.51	3449.44	#NULL!	#NULL!	3545.22	3502.55	#NULL!	#NULL!	#NULL!	#NULL!	501	501	1	1	9	8	8	8	2	8	1	8	2	8	1	1	2	2	1	2	2	1	2	1	0	1
A924966903	A924966	2010	1	1	2	A924	1	10	#NULL!	3	4	1	#NULL!	3389.51	3763.56	#NULL!	#NULL!	3399.91	3190.21	#NULL!	#NULL!	#NULL!	#NULL!	501	501	1	1	2	8	8	8	8	8	8	8	8	8	1	1	1	1	2	1	1	1	1	0	#NULL!	8
A924966904	A924966	2010	1	1	2	A924	1	8	#NULL!	4	4	1	#NULL!	3389.51	2525.99	#NULL!	#NULL!	2614.26	2576.2	#NULL!	#NULL!	#NULL!	#NULL!	501	501	1	2	8	8	8	8	8	8	8	8	8	8	2	8	8	8	8	1	1	1	1	0	#NULL!	8
A924967602	A924967	2010	1	1	2	A924	2	31	#NULL!	4	4	4	7	3389.51	8456.1	#NULL!	#NULL!	3817.31	8122.53	#NULL!	#NULL!	#NULL!	#NULL!	501	501	1	2	8	8	8	8	2	8	1	8	2	8	2	8	8	8	8	1	1	1	1	0	0	1
A924967701	A924967	2010	1	1	2	A924	1	47	#NULL!	3	3	2	3	3389.51	7615.01	12275.6	#NULL!	9144.78	7598.02	#NULL!	16269.5	#NULL!	#NULL!	501	501	1	2	8	2	8	8	2	8	1	8	2	8	2	8	8	8	8	1	1	1	1	0	0	2
A924967702	A924967	2010	1	1	2	A924	2	45	#NULL!	3	3	3	6	3389.51	4573.6	#NULL!	11869.9	4869.9	3656.64	#NULL!	#NULL!	21952.8	#NULL!	501	501	1	2	8	2	8	8	2	8	2	3	2	8	2	8	8	8	8	1	1	1	1	0	0	2
A924967703	A924967	2010	1	1	2	A924	1	18	#NULL!	3	3	3	7	3389.51	4318.6	#NULL!	#NULL!	4683.09	6367.94	#NULL!	#NULL!	#NULL!	#NULL!	501	501	1	2	8	8	8	8	8	8	1	8	1	2	2	8	8	8	8	1	1	1	1	0	#NULL!	2
A924967704	A924967	2010	1	1	2	A924	2	16	#NULL!	3	3	2	7	3389.51	7131.94	#NULL!	#NULL!	6562.91	5137.12	#NULL!	#NULL!	#NULL!	#NULL!	501	501	1	2	8	8	8	8	8	8	1	8	2	8	1	1	2	2	1	1	1	1	1	0	#NULL!	2
A924968401	A924968	2010	1	1	2	A924	1	51	#NULL!	4	4	3	1	3389.51	5969.92	8698.55	26864.3	6868.28	6091.94	28854.8	10867.1	20920.7	37996.8	501	501	1	1	9	2	8	8	2	8	1	8	1	1	1	1	1	1	2	2	2	1	2	1	0	2
A924968402	A924968	2010	1	1	2	A924	2	43	#NULL!	4	4	3	7	3389.51	4430.23	8457.92	#NULL!	4417.56	4126.94	#NULL!	7866.31	#NULL!	#NULL!	501	501	1	2	8	2	8	8	2	8	1	8	2	8	2	8	8	8	8	1	1	1	1	0	0	2
A924968403	A924968	2010	1	1	2	A924	2	19	#NULL!	4	4	3	7	3389.51	7131.94	#NULL!	#NULL!	6562.91	5137.12	#NULL!	#NULL!	#NULL!	#NULL!	501	501	1	2	8	8	8	8	2	8	1	8	2	8	2	8	8	8	8	1	1	1	1	0	0	1
A924968404	A924968	2010	1	1	2	A924	1	13	#NULL!	4	4	1	#NULL!	3389.51	3763.56	#NULL!	6977.82	3399.91	3190.21	#NULL!	#NULL!	9347.18	#NULL!	501	501	1	2	8	8	8	8	8	8	1	8	2	8	2	8	8	8	8	1	1	1	1	0	#NULL!	1
A924968405	A924968	2010	1	1	2	A924	2	87	#NULL!	4	4	1	7	3389.51	2450.96	#NULL!	#NULL!	2466.5	2708.7	#NULL!	#NULL!	#NULL!	#NULL!	501	501	1	2	8	2	8	8	2	8	3	3	1	2	2	8	8	8	8	1	1	1	2	1	0	2
A924968901	A924968	2010	1	1	2	A924	1	60	#NULL!	2	2	1	3	3389.51	2452.63	6437.65	#NULL!	#NULL!	#NULL!	#NULL!	#NULL!	#NULL!	#NULL!	501	501	1	2	8	1	1	2	2	8	1	8	2	8	2	8	8	8	8	1	1	1	1	0	0	2
A924968902	A924968	2010	1	1	2	A924	2	57	#NULL!	2	2	3	6	3389.51	3045.1	#NULL!	#NULL!	4371.17	3385.54	#NULL!	#NULL!	#NULL!	#NULL!	501	501	1	1	9	2	8	8	2	8	1	8	2	8	1	1	2	2	1	2	2	1	1	0	0	2
A924968903	A924968	2010	1	1	2	A924	2	27	#NULL!	2	2	3	2	3389.51	6541.85	#NULL!	12631	9184.71	7606.97	#NULL!	#NULL!	14127.5	#NULL!	501	501	1	2	8	8	8	8	2	8	2	3	1	3	2	8	8	8	8	1	1	1	1	0	0	1
A924969502	A924969	2010	1	1	2	A924	2	42	#NULL!	2	3	3	3	3389.51	8860.47	#NULL!	#NULL!	16399.7	16507.8	#NULL!	#NULL!	#NULL!	#NULL!	501	501	1	2	8	2	8	8	2	8	1	8	2	8	2	8	8	8	8	1	1	1	1	0	0	2
A924969504	A924969	2010	1	1	2	A924	2	12	#NULL!	3	3	1	#NULL!	3389.51	6689.63	#NULL!	#NULL!	#NULL!	#NULL!	#NULL!	#NULL!	#NULL!	#NULL!	501	501	1	2	8	8	8	8	8	8	1	8	1	2	2	8	8	8	8	1	1	1	1	0	#NULL!	2
A924970201	A924970	2010	1	1	2	A924	1	35	#NULL!	4	4	4	1	3389.51	4954.97	#NULL!	#NULL!	6025.36	6673.78	#NULL!	#NULL!	#NULL!	#NULL!	501	501	1	2	8	8	8	8	2	8	1	8	2	8	1	2	2	2	1	1	1	1	1	0	0	2
A924970202	A924970	2010	1	1	2	A924	2	35	#NULL!	4	4	4	7	3389.51	3449.44	#NULL!	11910.1	3545.22	3502.55	#NULL!	#NULL!	10873.7	#NULL!	501	501	1	2	8	8	8	8	2	8	1	8	1	2	2	8	8	8	8	1	1	1	1	0	0	2
A924970501	A924970	2010	1	1	2	A924	2	69	#NULL!	4	4	2	7	3389.51	1681.15	#NULL!	4966.51	1729.97	1850.94	#NULL!	#NULL!	4920.94	#NULL!	501	501	1	2	8	1	3	2	2	8	1	8	2	8	2	8	8	8	8	1	1	1	1	0	0	2
A924970502	A924970	2010	1	1	2	A924	2	38	#NULL!	4	4	4	7	3389.51	3449.44	#NULL!	#NULL!	3545.22	3502.55	#NULL!	#NULL!	#NULL!	#NULL!	501	501	1	2	8	8	8	8	2	8	1	8	2	8	2	8	8	8	8	1	1	1	1	0	0	2
A924970503	A924970	2010	1	1	2	A924	1	38	#NULL!	4	4	3	1	3389.51	4954.97	#NULL!	8803.45	6025.36	6673.78	#NULL!	#NULL!	11884.2	#NULL!	501	501	1	2	8	8	8	8	2	8	1	8	1	1	2	8	8	8	8	1	1	1	1	0	0	1
A924970504	A924970	2010	1	1	2	A924	1	3	43	4	4	1	#NULL!	3389.51	3143.61	#NULL!	#NULL!	3219.26	2699.16	#NULL!	#NULL!	#NULL!	#NULL!	501	501	1	8	8	8	8	8	8	8	8	8	8	8	8	8	8	8	8	8	8	8	8	#NULL!	#NULL!	8
A924971203	A924971	2010	1	1	2	A924	2	23	#NULL!	4	4	4	7	3389.51	15655	#NULL!	#NULL!	5176.46	19568.4	#NULL!	#NULL!	#NULL!	#NULL!	501	501	1	2	8	8	8	8	2	8	1	8	2	8	1	2	2	1	2	1	2	1	1	0	0	2
A924971301	A924971	2010	1	1	2	A924	1	74	#NULL!	3	2	1	5	3389.51	2344.1	2829	#NULL!	3810.28	3535.26	#NULL!	4221.16	#NULL!	#NULL!	501	501	1	2	8	2	8	8	2	8	1	8	1	1	1	1	1	1	1	1	1	1	1	0	0	1
A924971302	A924971	2010	1	1	2	A924	2	69	#NULL!	3	2	1	7	3389.51	2241.53	2413.12	6622.01	3459.93	3701.89	7941.38	3750.46	13122.5	16244	501	501	1	1	9	1	3	2	2	8	1	8	2	8	1	1	1	1	2	1	1	1	1	0	0	1
A924971304	A924971	2010	1	1	2	A924	2	42	#NULL!	2	2	3	7	3389.51	5906.98	5638.61	18651.8	#NULL!	#NULL!	18895.7	#NULL!	#NULL!	#NULL!	501	501	1	2	8	2	8	8	2	8	1	8	2	8	2	8	8	8	8	1	1	1	1	0	0	2
A924971502	A924971	2010	1	1	2	A924	2	36	#NULL!	2	3	4	7	3389.51	6898.89	#NULL!	#NULL!	7090.45	4670.07	#NULL!	#NULL!	#NULL!	#NULL!	501	501	1	1	9	8	8	8	1	1	1	8	2	8	1	1	1	1	2	1	1	1	1	0	1	2
A924971503	A924971	2010	1	1	2	A924	1	3	39	3	3	1	#NULL!	3389.51	3143.61	#NULL!	#NULL!	3219.26	3598.88	#NULL!	#NULL!	#NULL!	#NULL!	501	501	1	8	8	8	8	8	8	8	8	8	8	8	8	8	8	8	8	8	8	8	8	#NULL!	#NULL!	8
A924971504	A924971	2010	1	1	2	A924	2	1	14	3	3	1	#NULL!	3389.51	2889.86	#NULL!	#NULL!	2971.96	3186.58	#NULL!	#NULL!	#NULL!	#NULL!	501	501	1	8	8	8	8	8	8	8	8	8	8	8	8	8	8	8	8	8	8	8	8	#NULL!	#NULL!	8
A924972601	A924972	2010	1	1	2	A924	1	61	#NULL!	2	2	2	5	3389.51	2452.63	#NULL!	3591.83	2324.2	2460.11	#NULL!	#NULL!	3981.84	#NULL!	501	501	1	2	8	2	8	8	2	8	1	8	2	8	1	1	1	1	2	1	1	1	1	0	0	2
A924972602	A924972	2010	1	1	2	A924	2	57	#NULL!	2	2	1	7	3389.51	3045.1	#NULL!	3785.42	2914.11	2257.02	#NULL!	#NULL!	4005.25	#NULL!	501	501	1	2	8	1	2	1	2	8	2	3	2	8	1	1	2	1	2	1	1	1	1	0	0	2
A924973401	A924973	2010	1	1	2	A924	1	62	#NULL!	2	2	3	2	3389.51	2452.63	3218.82	#NULL!	2324.2	2460.11	#NULL!	3505.04	#NULL!	#NULL!	501	501	1	2	8	2	8	8	2	8	1	8	2	8	2	8	8	8	8	1	1	1	1	0	0	2
A924973402	A924973	2010	1	1	2	A924	2	61	#NULL!	3	2	2	7	3389.51	2297.26	2470.82	#NULL!	2296.69	2081.04	#NULL!	2586.12	#NULL!	#NULL!	501	501	1	2	8	1	3	2	2	8	2	3	1	2	2	8	8	8	8	1	1	1	1	0	0	2
A924973801	A924973	2010	1	1	2	A924	1	43	#NULL!	4	4	3	3	3389.51	4767.42	5051.72	13814.5	5018.46	6552.77	20590.2	6385.22	16562.9	28610.8	501	501	1	2	8	2	8	8	1	1	1	8	2	8	2	8	8	8	8	1	2	1	1	0	1	2
A924973802	A924973	2010	1	1	2	A924	2	43	#NULL!	4	4	3	1	3389.51	4430.23	5638.61	#NULL!	4417.56	4126.94	#NULL!	5244.21	#NULL!	#NULL!	501	501	1	2	8	1	2	2	1	2	2	3	2	8	1	1	1	2	1	1	1	1	1	0	1	2
A924973803	A924973	2010	1	1	2	A924	1	15	#NULL!	4	4	1	7	3389.51	4318.6	#NULL!	18115.6	4683.09	6367.94	#NULL!	#NULL!	13363.8	#NULL!	501	501	1	1	9	8	8	8	8	8	1	8	2	8	2	8	8	8	8	1	1	1	1	0	#NULL!	1
A924973804	A924973	2010	1	1	2	A924	2	10	#NULL!	4	4	1	#NULL!	3389.51	3344.82	#NULL!	#NULL!	3289.81	3244.08	#NULL!	#NULL!	#NULL!	#NULL!	501	501	1	1	9	8	8	8	8	8	8	8	8	8	2	8	8	8	8	1	1	1	1	0	#NULL!	8
A924975901	A924975	2010	1	1	2	A924	1	67	#NULL!	2	2	2	5	3389.51	2951.9	#NULL!	5526.67	2145.33	2335.64	#NULL!	#NULL!	6029.16	#NULL!	501	501	1	2	8	2	8	8	2	8	1	8	1	1	1	1	1	1	2	1	1	1	1	0	0	2
A924975903	A924975	2010	1	1	2	A924	2	35	#NULL!	1	2	3	7	3389.51	5174.17	#NULL!	8932.59	3545.22	4378.19	#NULL!	#NULL!	8155.28	#NULL!	501	501	1	1	2	8	8	8	2	8	1	8	1	1	1	1	1	1	1	1	1	1	1	0	0	2
A924975904	A924975	2010	1	1	2	A924	1	6	81	1	2	1	#NULL!	3389.51	2525.99	#NULL!	#NULL!	2614.26	3220.25	#NULL!	#NULL!	#NULL!	#NULL!	501	501	1	1	2	8	8	8	8	8	8	8	8	8	2	8	8	8	8	1	1	1	1	0	#NULL!	8
A924975905	A924975	2010	1	1	2	A924	2	5	66	1	2	1	#NULL!	3389.51	2282.17	#NULL!	#NULL!	2315.13	3255.24	#NULL!	#NULL!	#NULL!	#NULL!	501	501	1	1	2	8	8	8	8	8	8	8	8	8	8	8	8	8	8	8	8	8	8	#NULL!	#NULL!	8
A924977402	A924977	2010	1	1	2	A924	1	69	#NULL!	1	1	3	7	3389.51	2951.9	#NULL!	#NULL!	3217.99	2802.76	#NULL!	#NULL!	#NULL!	#NULL!	501	501	1	2	8	2	8	8	1	1	1	8	2	8	2	8	8	8	8	1	1	1	1	0	1	2
A924977403	A924977	2010	1	1	2	A924	2	66	#NULL!	1	1	1	7	3389.51	2521.72	4826.24	#NULL!	2594.95	2776.42	#NULL!	5000.62	#NULL!	#NULL!	501	501	1	1	2	1	3	2	2	8	1	8	2	8	1	1	2	2	1	1	2	1	1	0	0	2
A924978101	A924978	2010	1	1	2	A924	1	35	#NULL!	4	4	4	2	3389.51	4954.97	#NULL!	11737.9	6025.36	6673.78	#NULL!	#NULL!	15845.6	#NULL!	501	501	1	1	9	8	8	8	2	8	1	8	2	8	1	1	1	2	1	1	1	1	1	0	0	2
A924978102	A924978	2010	1	1	2	A924	2	35	#NULL!	4	4	4	2	3389.51	3449.44	#NULL!	#NULL!	3545.22	3502.55	#NULL!	#NULL!	#NULL!	#NULL!	501	501	1	2	8	8	8	8	2	8	1	8	2	8	2	8	8	8	8	1	1	1	1	0	0	2
A924978103	A924978	2010	1	1	2	A924	1	3	36	4	4	1	#NULL!	3389.51	3143.61	#NULL!	#NULL!	3219.26	2699.16	#NULL!	#NULL!	#NULL!	#NULL!	501	501	1	8	8	8	8	8	8	8	8	8	8	8	8	8	8	8	8	8	8	8	8	#NULL!	#NULL!	8
A924979002	A924979	2010	1	1	2	A924	2	39	#NULL!	4	4	3	2	3389.51	6898.89	#NULL!	#NULL!	#NULL!	#NULL!	#NULL!	#NULL!	#NULL!	#NULL!	501	501	1	1	9	8	8	8	2	8	1	8	1	1	2	8	8	8	8	1	1	1	1	0	0	1
A924979003	A924979	2010	1	1	2	A924	2	11	#NULL!	4	4	1	#NULL!	3389.51	3344.82	#NULL!	#NULL!	3289.81	6488.16	#NULL!	#NULL!	#NULL!	#NULL!	501	501	1	2	8	8	8	8	8	8	8	8	8	8	2	8	8	8	8	1	1	1	1	0	#NULL!	8
A924979004	A924979	2010	1	1	2	A924	2	6	82	4	4	1	#NULL!	3389.51	2282.17	#NULL!	#NULL!	2315.13	5208.38	#NULL!	#NULL!	#NULL!	#NULL!	501	501	1	2	8	8	8	8	8	8	8	8	8	8	2	8	8	8	8	1	1	1	1	0	#NULL!	8
A925971001	A925971	2010	1	1	1	A925	1	40	#NULL!	2	2	3	3	1603.04	1498.97	#NULL!	8687.14	#NULL!	#NULL!	#NULL!	#NULL!	#NULL!	#NULL!	512	517	1	2	8	2	8	8	2	8	1	8	2	8	2	8	8	8	8	1	1	1	1	0	0	2
A925971002	A925971	2010	1	1	1	A925	2	36	#NULL!	2	2	3	3	1603.04	1084.57	#NULL!	#NULL!	2229.38	1651.91	#NULL!	#NULL!	#NULL!	#NULL!	512	517	1	1	9	8	8	8	2	8	1	8	1	1	1	1	2	1	2	1	1	1	1	0	0	2
A925971003	A925971	2010	1	1	1	A925	1	10	#NULL!	2	2	1	#NULL!	1603.04	1183.34	#NULL!	#NULL!	1069	1504.6	#NULL!	#NULL!	#NULL!	#NULL!	512	517	1	2	8	8	8	8	8	8	8	8	8	8	1	2	2	1	2	1	1	1	1	0	#NULL!	8
A925971004	A925971	2010	1	1	1	A925	1	8	#NULL!	2	2	1	#NULL!	1603.04	794.223	#NULL!	#NULL!	821.974	1215.01	#NULL!	#NULL!	#NULL!	#NULL!	512	517	1	1	2	8	8	8	8	8	8	8	8	8	2	8	8	8	8	1	1	1	1	0	#NULL!	8
A925971005	A925971	2010	1	1	1	A925	2	63	#NULL!	3	2	1	7	1603.04	722.305	2330.62	#NULL!	#NULL!	#NULL!	#NULL!	#NULL!	#NULL!	#NULL!	512	517	1	2	8	2	8	8	2	8	1	8	2	8	2	8	8	8	8	1	1	1	1	0	0	2
A925971006	A925971	2010	1	1	1	A925	2	42	#NULL!	2	2	3	6	1603.04	1392.95	#NULL!	#NULL!	2777.94	1946.39	#NULL!	#NULL!	#NULL!	#NULL!	512	517	1	2	8	2	8	8	2	8	2	3	2	8	2	8	8	8	8	1	1	1	1	0	0	2
A925971501	A925971	2010	1	1	1	A925	1	76	#NULL!	1	1	1	6	1603.04	619.937	1948.97	5779.29	732.474	689.603	18592.1	2060.46	5792.92	16471.6	512	517	1	2	8	2	8	8	2	8	2	3	1	2	2	8	8	8	8	1	1	1	1	0	0	2
A925971901	A925971	2010	1	1	1	A925	1	65	#NULL!	4	3	4	1	1603.04	618.758	#NULL!	#NULL!	674.534	587.496	#NULL!	#NULL!	#NULL!	#NULL!	512	517	1	2	8	2	8	8	1	2	2	3	1	1	1	2	1	1	2	1	1	1	1	0	1	2
A925971902	A925971	2010	1	1	1	A925	2	58	#NULL!	3	3	4	7	1603.04	957.441	1578.93	#NULL!	916.256	709.654	#NULL!	1646.45	#NULL!	#NULL!	512	517	1	2	8	2	8	8	2	8	1	8	2	8	2	8	8	8	8	1	1	1	1	0	0	2
A925971903	A925971	2010	1	1	1	A925	2	30	#NULL!	2	3	4	1	1603.04	1329.38	#NULL!	9410.36	1200.24	1276.94	#NULL!	#NULL!	9358.5	#NULL!	512	517	1	2	8	8	8	8	2	8	1	8	2	8	2	8	8	8	8	1	1	1	1	0	0	2
A925971904	A925971	2010	1	1	1	A925	1	32	#NULL!	3	3	4	1	1603.04	1895.82	#NULL!	#NULL!	3106.18	2703.46	#NULL!	#NULL!	#NULL!	#NULL!	512	517	1	2	8	8	8	8	2	8	1	8	1	1	2	8	8	8	8	1	1	1	1	0	0	3
A925972401	A925972	2010	1	1	1	A925	1	45	#NULL!	4	4	2	3	1603.04	2394.31	1929.85	#NULL!	3450.36	2866.76	#NULL!	3836.58	#NULL!	#NULL!	512	517	1	1	2	2	8	8	2	8	1	8	2	8	1	2	2	1	2	1	1	1	1	0	0	2
A925972402	A925972	2010	1	1	1	A925	2	44	#NULL!	4	4	4	1	1603.04	1392.95	1772.89	#NULL!	1666.76	1557.11	#NULL!	2473.33	#NULL!	#NULL!	512	517	1	1	2	2	8	8	2	8	2	3	1	1	1	2	2	1	2	1	1	1	1	0	0	2
A925972403	A925972	2010	1	1	1	A925	2	18	#NULL!	4	4	3	7	1603.04	2242.42	#NULL!	5561.19	2476.21	1938.26	#NULL!	#NULL!	8195.74	#NULL!	512	517	1	2	8	8	8	8	8	8	1	8	2	8	1	1	1	1	2	1	1	1	1	0	#NULL!	2
A925972404	A925972	2010	1	1	1	A925	1	16	#NULL!	4	4	2	7	1603.04	1357.85	#NULL!	#NULL!	1766.95	2402.65	#NULL!	#NULL!	#NULL!	#NULL!	512	517	1	1	2	8	8	8	8	8	1	8	1	1	2	8	8	8	8	1	1	1	1	0	#NULL!	2
A925972405	A925972	2010	1	1	1	A925	1	16	#NULL!	4	4	2	7	1603.04	1357.85	#NULL!	#NULL!	1766.95	2402.65	#NULL!	#NULL!	#NULL!	#NULL!	512	517	1	2	8	8	8	8	8	8	1	8	2	8	2	8	8	8	8	1	1	1	1	0	#NULL!	1
A925972406	A925972	2010	1	1	1	A925	2	78	#NULL!	4	4	1	7	1603.04	770.632	3521.35	#NULL!	#NULL!	#NULL!	#NULL!	#NULL!	#NULL!	#NULL!	512	517	1	2	8	2	8	8	2	8	3	3	2	8	2	8	8	8	8	1	1	1	1	0	0	2
A925973501	A925973	2010	1	1	1	A925	1	74	#NULL!	4	2	2	3	1603.04	552.775	#NULL!	#NULL!	599.014	555.778	#NULL!	#NULL!	#NULL!	#NULL!	512	517	1	2	8	2	8	8	2	8	1	8	2	8	2	8	8	8	8	1	1	1	1	0	0	2
A925973502	A925973	2010	1	1	1	A925	2	68	#NULL!	3	2	3	3	1603.04	528.587	#NULL!	#NULL!	543.936	581.974	#NULL!	#NULL!	#NULL!	#NULL!	512	517	1	2	8	2	8	8	1	2	1	8	2	8	2	8	8	8	8	1	1	1	1	0	1	2
A925973801	A925973	2010	1	1	1	A925	1	26	#NULL!	3	3	4	1	1603.04	2276.04	#NULL!	1733.92	2663.22	2909.45	#NULL!	#NULL!	2135.32	#NULL!	512	517	1	2	8	8	8	8	2	8	1	8	2	8	2	8	8	8	8	1	1	1	1	0	0	2
A925975701	A925975	2010	1	1	1	A925	2	74	#NULL!	4	4	1	7	1603.04	696.134	1698.04	#NULL!	599.697	998.835	#NULL!	1828.59	#NULL!	#NULL!	512	517	1	2	8	2	8	8	2	8	3	3	2	8	1	1	2	2	2	1	1	1	1	0	0	2
A925975702	A925975	2010	1	1	1	A925	2	44	#NULL!	4	4	4	3	1603.04	1392.95	2659.34	8796.76	1388.97	2162.66	11882.4	2473.33	11809.2	12302.2	512	517	1	1	2	2	8	8	2	8	1	8	2	8	1	1	2	2	1	1	1	1	1	0	0	2
A925975703	A925975	2010	1	1	1	A925	1	45	#NULL!	4	4	#NULL!	#NULL!	1603.04	2394.31	#NULL!	#NULL!	2875.3	3981.61	#NULL!	#NULL!	#NULL!	#NULL!	512	517	1	9	9	2	8	8	2	8	1	8	2	8	2	8	8	8	8	1	1	1	1	0	0	2
A925976401	A925976	2010	1	1	1	A925	1	68	#NULL!	3	3	4	6	1603.04	618.758	#NULL!	#NULL!	674.534	587.496	#NULL!	#NULL!	#NULL!	#NULL!	512	517	1	2	8	2	8	8	2	8	1	8	2	8	2	8	8	8	8	1	1	1	1	0	0	2
A925976402	A925976	2010	1	1	1	A925	2	69	#NULL!	4	3	2	7	1603.04	528.587	1011.64	#NULL!	543.936	581.974	#NULL!	1048.2	#NULL!	#NULL!	512	517	1	2	8	2	8	8	1	2	1	8	2	8	2	8	8	8	8	1	1	1	1	0	1	2
A925976403	A925976	2010	1	1	1	A925	2	43	#NULL!	2	3	3	3	1603.04	1392.95	2363.86	11729	1388.97	1297.59	15843.2	2198.51	9447.35	16402.9	512	517	1	1	9	2	8	8	2	8	1	8	1	1	1	1	1	1	2	1	1	1	1	0	0	2
A925976404	A925976	2010	1	1	1	A925	1	42	#NULL!	2	3	4	1	1603.04	1498.97	2117.82	#NULL!	1577.91	2060.32	#NULL!	2676.85	#NULL!	#NULL!	512	517	1	1	9	2	8	8	2	8	2	3	2	8	2	8	8	8	8	1	1	1	1	0	0	2
A925978801	A925978	2010	1	1	1	A925	1	69	#NULL!	1	1	3	5	1603.04	618.758	824.927	#NULL!	674.534	587.496	#NULL!	923.034	#NULL!	#NULL!	512	517	1	2	8	2	8	8	2	8	1	8	2	8	2	8	8	8	8	1	1	1	1	0	0	2
A925978802	A925978	2010	1	1	1	A925	2	59	#NULL!	1	1	2	3	1603.04	957.441	789.465	2380.42	916.256	709.654	3601.23	823.226	2518.66	3880.19	512	517	1	1	2	2	8	8	2	8	1	8	2	8	2	8	8	8	8	1	1	1	1	0	0	2
A925979001	A925979	2010	1	1	1	A925	1	49	#NULL!	#NULL!	#NULL!	4	7	1603.04	2394.31	1929.85	#NULL!	2875.3	2388.97	#NULL!	2557.72	#NULL!	#NULL!	512	517	1	2	8	2	8	8	2	8	2	3	2	8	2	8	8	8	8	1	1	1	1	0	0	2
A925979003	A925979	2010	1	1	1	A925	1	16	#NULL!	#NULL!	#NULL!	2	7	1603.04	1357.85	#NULL!	2847.96	1472.46	2002.21	#NULL!	#NULL!	4201.86	#NULL!	512	517	1	2	8	8	8	8	8	8	1	8	1	1	2	8	8	8	8	1	1	1	1	0	#NULL!	1
A925979201	A925979	2010	1	1	1	A925	2	33	#NULL!	#NULL!	#NULL!	4	1	1603.04	1329.38	#NULL!	#NULL!	1200.24	1276.94	#NULL!	#NULL!	#NULL!	#NULL!	512	517	1	1	2	8	8	8	2	8	1	8	2	8	1	2	1	1	2	1	1	1	1	0	0	2
A925979202	A925979	2010	1	1	1	A925	1	34	#NULL!	#NULL!	#NULL!	4	1	1603.04	1895.82	#NULL!	#NULL!	3106.18	2703.46	#NULL!	#NULL!	#NULL!	#NULL!	512	517	1	1	2	8	8	8	2	8	1	8	2	8	1	1	1	1	2	1	1	1	1	0	0	2
A925979701	A925979	2010	1	1	1	A925	1	40	#NULL!	2	2	4	1	1603.04	1498.97	3176.72	#NULL!	1577.91	2060.32	#NULL!	4015.28	#NULL!	#NULL!	512	517	1	2	8	2	8	8	2	8	1	8	2	8	2	8	8	8	8	1	1	1	1	0	0	2
A925979702	A925979	2010	1	1	1	A925	2	34	#NULL!	2	2	4	7	1603.04	1329.38	#NULL!	7057.77	1200.24	1276.94	#NULL!	#NULL!	7018.88	#NULL!	512	517	1	2	8	8	8	8	2	8	1	8	2	8	1	1	1	1	2	1	1	1	1	0	0	2
A925979703	A925979	2010	1	1	1	A925	2	78	#NULL!	3	2	1	7	1603.04	770.632	#NULL!	#NULL!	775.517	851.67	#NULL!	#NULL!	#NULL!	#NULL!	512	517	1	2	8	1	3	1	2	8	3	1	1	3	2	8	8	8	8	2	1	1	2	1	0	2
A925979704	A925979	2010	1	1	1	A925	2	2	34	2	2	1	#NULL!	1603.04	908.629	#NULL!	#NULL!	934.444	751.443	#NULL!	#NULL!	#NULL!	#NULL!	512	517	1	8	8	8	8	8	8	8	8	8	8	8	8	8	8	8	8	8	8	8	8	#NULL!	#NULL!	8
A926961703	A926961	2010	1	1	2	A926	1	23	#NULL!	3	3	3	7	4752.31	9039.39	#NULL!	#NULL!	19634.5	20607.7	#NULL!	#NULL!	#NULL!	#NULL!	501	501	1	2	8	8	8	8	2	8	1	8	2	8	2	8	8	8	8	1	1	1	1	0	0	1
A926961704	A926961	2010	1	1	2	A926	2	27	#NULL!	2	3	4	1	4752.31	9172.08	#NULL!	11806.3	8585.02	7110.29	#NULL!	#NULL!	13205.1	#NULL!	501	501	1	2	8	8	8	8	2	8	1	8	2	8	2	8	8	8	8	1	1	1	1	0	0	2
A926962201	A926962	2010	1	1	2	A926	1	32	#NULL!	3	3	4	1	4752.31	8453.82	#NULL!	#NULL!	13851.1	12055.3	#NULL!	#NULL!	#NULL!	#NULL!	501	501	1	2	8	8	8	8	2	8	1	8	2	8	2	8	8	8	8	1	1	1	1	0	0	1
A926962202	A926962	2010	1	1	2	A926	2	33	#NULL!	3	3	4	7	4752.31	5927.99	#NULL!	#NULL!	5352.11	5694.14	#NULL!	#NULL!	#NULL!	#NULL!	501	501	1	2	8	8	8	8	2	8	1	8	2	8	2	8	8	8	8	1	1	1	1	0	0	2
A926962801	A926962	2010	1	1	2	A926	2	34	#NULL!	2	3	4	7	4752.31	5927.99	#NULL!	#NULL!	10704.2	8541.21	#NULL!	#NULL!	#NULL!	#NULL!	501	501	1	2	8	8	8	8	2	8	1	8	2	8	2	8	8	8	8	1	1	1	1	0	0	2
A926962802	A926962	2010	1	1	2	A926	1	38	#NULL!	2	3	4	1	4752.31	6947.17	#NULL!	16457.3	#NULL!	#NULL!	#NULL!	#NULL!	#NULL!	#NULL!	501	501	1	2	8	8	8	8	2	8	1	8	1	2	2	8	8	8	8	1	1	1	1	0	0	2
A926962803	A926962	2010	1	1	2	A926	2	3	41	2	3	1	#NULL!	4752.31	4051.76	#NULL!	#NULL!	4166.87	5026.25	#NULL!	#NULL!	#NULL!	#NULL!	501	501	1	8	8	8	8	8	8	8	8	8	8	8	8	8	8	8	8	8	8	8	8	#NULL!	#NULL!	8
A926963501	A926963	2010	1	1	2	A926	1	34	#NULL!	3	3	3	3	4752.31	8453.82	#NULL!	11700	13851.1	12055.3	#NULL!	#NULL!	18212.4	#NULL!	501	501	1	2	8	8	8	8	2	8	1	8	2	8	2	8	8	8	8	1	1	1	1	0	0	2
A926964302	A926964	2010	1	1	2	A926	2	35	#NULL!	2	2	3	7	4752.31	4836.33	#NULL!	16698.7	9941.25	6547.72	#NULL!	#NULL!	15245.6	#NULL!	501	501	1	1	2	8	8	8	2	8	1	8	1	2	2	8	8	8	8	1	2	1	1	0	0	1
A926964303	A926964	2010	1	1	2	A926	2	9	#NULL!	2	2	1	#NULL!	4752.31	3199.74	#NULL!	#NULL!	3245.95	4868.32	#NULL!	#NULL!	#NULL!	#NULL!	501	501	1	2	8	8	8	8	8	8	8	8	8	8	2	8	8	8	8	1	1	1	1	0	#NULL!	8
A926966102	A926966	2010	1	1	2	A926	2	55	#NULL!	1	1	2	7	4752.31	8538.84	7040.76	#NULL!	8171.54	6328.97	#NULL!	7341.86	#NULL!	#NULL!	501	501	1	2	8	2	8	8	2	8	1	8	2	8	2	8	8	8	8	1	1	1	1	0	0	2
A926966201	A926966	2010	1	1	2	A926	1	41	#NULL!	3	3	3	5	4752.31	6684.22	7082.83	19368.8	7036.2	9187.38	14434.4	8952.47	34833.4	20057	501	501	1	2	8	2	8	8	2	8	1	8	2	8	2	8	8	8	8	1	1	1	1	0	0	2
A926966202	A926966	2010	1	1	2	A926	2	37	#NULL!	3	3	3	2	4752.31	4836.33	#NULL!	#NULL!	4970.62	4910.79	#NULL!	#NULL!	#NULL!	#NULL!	501	501	1	2	8	8	8	8	2	8	1	8	2	8	2	8	8	8	8	1	1	1	1	0	0	2
A926966203	A926966	2010	1	1	2	A926	1	10	#NULL!	3	3	1	#NULL!	4752.31	5276.74	#NULL!	#NULL!	4766.89	4472.87	#NULL!	#NULL!	#NULL!	#NULL!	501	501	1	2	8	8	8	8	8	8	8	8	8	8	2	8	8	8	8	1	1	1	1	0	#NULL!	8
A926966204	A926966	2010	1	1	2	A926	1	6	80	3	3	1	#NULL!	4752.31	3541.6	#NULL!	#NULL!	3665.35	3611.99	#NULL!	#NULL!	#NULL!	#NULL!	501	501	1	1	2	8	8	8	8	8	8	8	8	8	1	1	1	1	2	1	1	1	1	0	#NULL!	8
A926966601	A926966	2010	1	1	2	A926	1	45	#NULL!	1	1	3	5	4752.31	10676.7	17211.2	#NULL!	12821.6	10652.9	#NULL!	22810.8	#NULL!	#NULL!	501	501	1	2	8	2	8	8	2	8	1	8	2	8	2	8	8	8	8	1	1	1	1	0	0	2
A926966602	A926966	2010	1	1	2	A926	2	71	#NULL!	3	1	1	7	4752.31	3104.2	#NULL!	#NULL!	2674.17	2672.4	#NULL!	#NULL!	#NULL!	#NULL!	501	501	1	2	8	2	8	8	2	8	1	8	2	8	2	8	8	8	8	1	1	1	1	0	0	2
A926967502	A926967	2010	1	1	2	A926	2	31	#NULL!	2	3	4	7	4752.31	5927.99	#NULL!	#NULL!	10704.2	7592.19	#NULL!	#NULL!	#NULL!	#NULL!	501	501	1	1	2	8	8	8	2	8	1	8	2	8	1	1	2	1	1	1	1	1	1	0	0	2
A926967503	A926967	2010	1	1	2	A926	1	4	57	3	3	1	#NULL!	4752.31	4407.53	#NULL!	#NULL!	4513.6	5045.85	#NULL!	#NULL!	#NULL!	#NULL!	501	501	1	1	1	8	8	8	8	8	8	8	8	8	8	8	8	8	8	8	8	8	8	#NULL!	#NULL!	8
A926967504	A926967	2010	1	1	2	A926	2	2	35	2	3	1	#NULL!	4752.31	4051.76	#NULL!	#NULL!	4166.87	4467.78	#NULL!	#NULL!	#NULL!	#NULL!	501	501	1	8	8	8	8	8	8	8	8	8	8	8	8	8	8	8	8	8	8	8	8	#NULL!	#NULL!	8
A926968101	A926968	2010	1	1	2	A926	1	43	#NULL!	3	3	4	3	4752.31	6684.22	#NULL!	#NULL!	7036.2	9187.38	#NULL!	#NULL!	#NULL!	#NULL!	501	501	1	2	8	2	8	8	2	8	1	8	2	8	2	8	8	8	8	1	1	1	1	0	0	2
A926968102	A926968	2010	1	1	2	A926	2	39	#NULL!	3	3	4	1	4752.31	4836.33	#NULL!	#NULL!	4970.62	4910.79	#NULL!	#NULL!	#NULL!	#NULL!	501	501	1	2	8	8	8	8	2	8	1	8	2	8	2	8	8	8	8	1	1	1	1	0	0	2
A926968103	A926968	2010	1	1	2	A926	2	10	#NULL!	3	3	1	#NULL!	4752.31	4689.64	#NULL!	#NULL!	4612.52	4548.4	#NULL!	#NULL!	#NULL!	#NULL!	501	501	1	2	8	8	8	8	8	8	8	8	8	8	2	8	8	8	8	1	1	1	1	0	#NULL!	8
A926968104	A926968	2010	1	1	2	A926	1	7	#NULL!	3	3	1	#NULL!	4752.31	3541.6	#NULL!	#NULL!	3665.35	3611.99	#NULL!	#NULL!	#NULL!	#NULL!	501	501	1	2	8	8	8	8	8	8	8	8	8	8	2	8	8	8	8	1	1	1	1	0	#NULL!	8
A926968801	A926968	2010	1	1	2	A926	1	65	#NULL!	2	1	1	7	4752.31	2759.16	3678.52	5165.82	3007.88	2619.76	8066.04	4115.99	5635.5	9369.08	501	501	1	1	2	2	8	8	2	8	1	8	2	8	2	8	8	8	8	1	1	1	1	0	0	2
A926970501	A926970	2010	1	1	2	A926	2	60	#NULL!	#NULL!	#NULL!	1	7	4752.31	3220.9	#NULL!	#NULL!	#NULL!	#NULL!	#NULL!	#NULL!	#NULL!	#NULL!	501	501	1	2	8	2	8	8	2	8	1	8	2	8	2	8	8	8	8	1	1	1	1	0	0	2
A926970502	A926970	2010	1	1	2	A926	1	60	#NULL!	#NULL!	#NULL!	2	1	4752.31	3438.74	9025.98	#NULL!	#NULL!	#NULL!	#NULL!	#NULL!	#NULL!	#NULL!	501	501	1	2	8	2	8	8	2	8	1	8	2	8	2	8	8	8	8	1	1	1	1	0	0	2
A926971801	A926971	2010	1	1	2	A926	1	37	#NULL!	1	2	4	5	4752.31	6947.17	#NULL!	#NULL!	8447.92	9357.05	#NULL!	#NULL!	#NULL!	#NULL!	501	501	1	2	8	8	8	8	2	8	1	8	1	1	2	8	8	8	8	1	1	1	1	0	0	1
A926971802	A926971	2010	1	1	2	A926	2	34	#NULL!	1	2	3	7	4752.31	5927.99	#NULL!	#NULL!	5352.11	5694.14	#NULL!	#NULL!	#NULL!	#NULL!	501	501	1	2	8	8	8	8	2	8	1	8	2	8	1	1	1	1	2	1	1	1	1	0	0	2
A926971803	A926971	2010	1	1	2	A926	2	5	67	1	2	1	#NULL!	4752.31	3199.74	#NULL!	#NULL!	3245.95	3651.24	#NULL!	#NULL!	#NULL!	#NULL!	501	501	1	2	8	8	8	8	8	8	8	8	8	8	8	8	8	8	8	8	8	8	8	#NULL!	#NULL!	8
A926971804	A926971	2010	1	1	2	A926	1	2	25	1	2	1	#NULL!	4752.31	4407.53	#NULL!	#NULL!	4513.6	3784.39	#NULL!	#NULL!	#NULL!	#NULL!	501	501	1	8	8	8	8	8	8	8	8	8	8	8	8	8	8	8	8	8	8	8	8	#NULL!	#NULL!	8
A926972801	A926972	2010	1	1	2	A926	1	62	#NULL!	3	3	2	3	4752.31	5158.11	9025.98	#NULL!	4888	5173.85	#NULL!	9828.57	#NULL!	#NULL!	501	501	1	2	8	2	8	8	2	8	1	8	2	8	2	8	8	8	8	1	1	1	1	0	0	2
A926972802	A926972	2010	1	1	2	A926	2	56	#NULL!	3	3	1	3	4752.31	6404.13	#NULL!	15922.2	6128.65	4746.73	#NULL!	#NULL!	16846.8	#NULL!	501	501	1	2	8	2	8	8	2	8	1	8	1	2	1	1	2	1	2	1	1	1	1	0	0	2
A926973301	A926973	2010	1	1	2	A926	2	56	#NULL!	4	4	4	1	4752.31	4269.42	#NULL!	#NULL!	5447.69	4219.32	#NULL!	#NULL!	#NULL!	#NULL!	501	501	1	2	8	2	8	8	2	8	2	3	1	1	2	8	8	8	8	1	1	1	1	0	0	2
A926973302	A926973	2010	1	1	2	A926	1	60	#NULL!	4	4	4	1	4752.31	3438.74	9025.98	#NULL!	4344.89	4598.98	#NULL!	9828.57	#NULL!	#NULL!	501	501	1	2	8	2	8	8	2	8	1	8	2	8	2	8	8	8	8	1	1	1	1	0	0	2
A926973303	A926973	2010	1	1	2	A926	2	31	#NULL!	4	4	4	7	4752.31	5927.99	#NULL!	#NULL!	7136.14	7592.19	#NULL!	#NULL!	#NULL!	#NULL!	501	501	1	2	8	8	8	8	2	8	1	8	2	8	2	8	8	8	8	1	1	1	1	0	0	2
A926973304	A926973	2010	1	1	2	A926	1	27	#NULL!	4	4	4	7	4752.31	10149.3	#NULL!	30927.6	#NULL!	#NULL!	#NULL!	#NULL!	#NULL!	#NULL!	501	501	1	2	8	8	8	8	2	8	1	8	2	8	2	8	8	8	8	1	1	1	1	0	0	1
A926974701	A926974	2010	1	1	2	A926	1	39	#NULL!	3	3	3	5	4752.31	6947.17	#NULL!	#NULL!	8447.92	9357.05	#NULL!	#NULL!	#NULL!	#NULL!	501	501	1	1	2	8	8	8	2	8	1	8	2	8	2	8	8	8	8	1	1	1	1	0	0	2
A926974702	A926974	2010	1	1	2	A926	2	39	#NULL!	3	3	4	2	4752.31	4836.33	#NULL!	#NULL!	4970.62	4910.79	#NULL!	#NULL!	#NULL!	#NULL!	501	501	1	2	8	8	8	8	2	8	1	8	1	2	1	1	1	1	2	1	1	1	1	0	0	2
A926974703	A926974	2010	1	1	2	A926	2	7	#NULL!	3	3	1	#NULL!	4752.31	3199.74	#NULL!	#NULL!	3245.95	3651.24	#NULL!	#NULL!	#NULL!	#NULL!	501	501	1	2	8	8	8	8	8	8	8	8	8	8	2	8	8	8	8	1	1	1	1	0	#NULL!	8
A926974704	A926974	2010	1	1	2	A926	1	9	#NULL!	3	3	1	#NULL!	4752.31	3541.6	#NULL!	#NULL!	3665.35	3611.99	#NULL!	#NULL!	#NULL!	#NULL!	501	501	1	2	8	8	8	8	8	8	8	8	8	8	2	8	8	8	8	1	1	1	1	0	#NULL!	8
A926975901	A926975	2010	1	1	2	A926	2	49	#NULL!	4	4	2	3	4752.31	12824.9	6585.66	16642.3	13655.8	10253.7	13087.6	7008.12	15389.6	14547.5	501	501	1	2	8	2	8	8	2	8	1	8	2	8	2	8	8	8	8	1	1	1	1	0	0	2
A926977201	A926977	2010	1	1	2	A926	1	36	#NULL!	3	3	4	2	4752.31	6947.17	#NULL!	#NULL!	8447.92	9357.05	#NULL!	#NULL!	#NULL!	#NULL!	501	501	1	2	8	8	8	8	2	8	1	8	2	8	2	8	8	8	8	1	1	1	1	0	0	2
A926977202	A926977	2010	1	1	2	A926	2	36	#NULL!	3	3	4	7	4752.31	4836.33	#NULL!	16698.7	4970.62	4910.79	#NULL!	#NULL!	15245.6	#NULL!	501	501	1	2	8	8	8	8	2	8	1	8	2	8	2	8	8	8	8	1	1	1	1	0	0	2
A926977203	A926977	2010	1	1	2	A926	1	8	#NULL!	3	3	1	#NULL!	4752.31	3541.6	#NULL!	#NULL!	3665.35	3611.99	#NULL!	#NULL!	#NULL!	#NULL!	501	501	1	2	8	8	8	8	8	8	8	8	8	8	2	8	8	8	8	1	1	1	1	0	#NULL!	8
A926977204	A926977	2010	1	1	2	A926	2	5	70	3	3	1	#NULL!	4752.31	3199.74	#NULL!	#NULL!	3245.95	3651.24	#NULL!	#NULL!	#NULL!	#NULL!	501	501	1	2	8	8	8	8	8	8	8	8	8	8	8	8	8	8	8	8	8	8	8	#NULL!	#NULL!	8
A926978601	A926978	2010	1	1	2	A926	1	38	#NULL!	4	4	4	2	4752.31	6947.17	#NULL!	#NULL!	8447.92	9357.05	#NULL!	#NULL!	#NULL!	#NULL!	501	501	1	2	8	8	8	8	2	8	1	8	2	8	2	8	8	8	8	1	1	1	1	0	0	2
A926978602	A926978	2010	1	1	2	A926	2	33	#NULL!	4	4	4	7	4752.31	5927.99	#NULL!	#NULL!	5352.11	5694.14	#NULL!	#NULL!	#NULL!	#NULL!	501	501	1	2	8	8	8	8	2	8	1	8	2	8	2	8	8	8	8	1	1	1	1	0	0	2
A926978603	A926978	2010	1	1	2	A926	1	7	#NULL!	4	4	1	#NULL!	4752.31	3541.6	#NULL!	#NULL!	3665.35	3611.99	#NULL!	#NULL!	#NULL!	#NULL!	501	501	1	1	2	8	8	8	8	8	8	8	8	8	1	2	1	1	2	1	1	1	1	0	#NULL!	8
A926978604	A926978	2010	1	1	2	A926	2	3	37	4	4	1	#NULL!	4752.31	4051.76	#NULL!	#NULL!	4166.87	3350.83	#NULL!	#NULL!	#NULL!	#NULL!	501	501	1	8	8	8	8	8	8	8	8	8	8	8	8	8	8	8	8	8	8	8	8	#NULL!	#NULL!	8
A927968301	A927968	2010	1	1	1	A927	2	67	#NULL!	3	2	1	7	4735.98	2101.71	#NULL!	#NULL!	2162.75	2313.99	#NULL!	#NULL!	#NULL!	#NULL!	512	517	1	1	2	1	1	2	1	1	3	1	1	3	2	8	8	8	8	2	2	1	1	0	1	2
A927968401	A927968	2010	1	1	1	A927	1	66	#NULL!	4	3	2	3	4735.98	3690.36	3279.99	#NULL!	4023.02	3503.92	#NULL!	3670.08	#NULL!	#NULL!	512	517	1	2	8	2	8	8	2	8	2	3	1	2	2	8	8	8	8	1	1	1	1	0	0	2
A927968402	A927968	2010	1	1	1	A927	2	62	#NULL!	3	3	1	3	4735.98	4307.94	3088.93	20341.8	4306.86	3902.47	23841.6	3233.08	19637.3	24059	512	517	1	2	8	2	8	8	2	8	1	8	2	8	1	1	1	1	2	1	1	1	1	0	0	2
A927968901	A927968	2010	1	1	1	A927	2	54	#NULL!	2	3	3	2	4735.98	3769.38	4051.96	#NULL!	3970.23	3652.79	#NULL!	4240.44	#NULL!	#NULL!	512	517	1	2	8	2	8	8	2	8	1	8	2	8	2	8	8	8	8	1	1	1	1	0	0	2
A927968902	A927968	2010	1	1	1	A927	2	27	#NULL!	2	3	3	2	4735.98	8178.4	#NULL!	15790.8	7654.94	6339.98	#NULL!	#NULL!	17661.8	#NULL!	512	517	1	2	8	8	8	8	1	1	1	8	2	8	2	8	8	8	8	1	1	1	1	0	1	1
A927968903	A927968	2010	1	1	1	A927	2	24	#NULL!	2	3	3	7	4735.98	5077.37	#NULL!	#NULL!	6471.43	7240.21	#NULL!	#NULL!	#NULL!	#NULL!	512	517	1	2	8	8	8	8	2	8	1	8	2	8	1	1	1	1	2	1	1	1	1	0	0	1
A927969101	A927969	2010	1	1	1	A927	1	61	#NULL!	3	4	2	6	4735.98	3066.2	#NULL!	17961.6	2905.63	3075.55	#NULL!	#NULL!	19911.8	#NULL!	512	517	1	2	8	2	8	8	2	8	1	8	2	8	2	8	8	8	8	1	1	1	1	0	0	2
A927969102	A927969	2010	1	1	1	A927	2	53	#NULL!	3	4	1	3	4735.98	3769.38	#NULL!	#NULL!	3970.23	3652.79	#NULL!	#NULL!	#NULL!	#NULL!	512	517	1	2	8	1	2	2	2	8	1	8	2	8	2	8	8	8	8	1	1	1	1	0	0	1
A927969103	A927969	2010	1	1	1	A927	1	26	#NULL!	3	4	4	3	4735.98	9049.76	#NULL!	#NULL!	10589.2	11568.3	#NULL!	#NULL!	#NULL!	#NULL!	512	517	1	2	8	8	8	8	2	8	1	8	2	8	2	8	8	8	8	1	1	1	1	0	0	1
A927969104	A927969	2010	1	1	1	A927	2	28	#NULL!	3	4	3	7	4735.98	8178.4	#NULL!	#NULL!	7654.94	6339.98	#NULL!	#NULL!	#NULL!	#NULL!	512	517	1	2	8	8	8	8	2	8	2	3	2	8	2	8	8	8	8	1	1	1	1	0	0	2
A927969501	A927969	2010	1	1	1	A927	2	41	#NULL!	4	4	4	2	4735.98	5538.53	#NULL!	11658.9	5522.68	5159.36	#NULL!	#NULL!	9390.9	#NULL!	512	517	1	2	8	2	8	8	2	8	1	8	2	8	1	2	2	2	1	1	2	1	1	0	0	1
A927969802	A927969	2010	1	1	1	A927	2	58	#NULL!	1	2	1	7	4735.98	3806.88	3138.99	4732.4	3643.13	2821.65	7159.44	3273.23	5007.23	7714.02	512	517	1	2	8	1	2	2	2	8	1	8	2	8	1	1	2	2	2	1	1	1	1	0	0	2
A927970202	A927970	2010	1	1	1	A927	2	72	#NULL!	4	3	1	7	4735.98	2767.9	4501.06	#NULL!	#NULL!	#NULL!	#NULL!	#NULL!	#NULL!	#NULL!	512	517	1	1	2	1	1	2	2	8	1	8	2	8	1	2	2	1	1	2	2	1	1	0	0	2
A927971301	A927971	2010	1	1	1	A927	2	56	#NULL!	2	2	1	6	4735.98	3806.88	3138.99	#NULL!	3643.13	2821.65	#NULL!	3273.23	#NULL!	#NULL!	512	517	1	2	8	1	2	2	2	8	1	8	1	2	2	8	8	8	8	1	1	1	1	0	0	2
A927971302	A927971	2010	1	1	1	A927	1	54	#NULL!	1	2	2	3	4735.98	7463.38	7249.76	#NULL!	8586.49	7615.93	#NULL!	9057.1	#NULL!	#NULL!	512	517	1	2	8	1	2	2	2	8	1	8	1	1	1	1	1	1	2	1	1	1	1	0	0	2
A927971303	A927971	2010	1	1	1	A927	2	14	#NULL!	2	2	1	#NULL!	4735.98	4181.57	#NULL!	7368.27	4112.81	4055.64	#NULL!	#NULL!	12489.4	#NULL!	512	517	1	2	8	8	8	8	8	8	1	8	2	8	1	1	1	1	1	1	1	1	1	0	#NULL!	1
A927971304	A927971	2010	1	1	1	A927	1	9	#NULL!	1	2	1	#NULL!	4735.98	3157.91	#NULL!	#NULL!	3268.25	3220.68	#NULL!	#NULL!	#NULL!	#NULL!	512	517	1	2	8	8	8	8	8	8	8	8	8	8	1	1	1	1	2	1	1	1	1	0	#NULL!	8
A927971401	A927971	2010	1	1	1	A927	1	53	#NULL!	3	4	1	5	4735.98	7463.38	#NULL!	#NULL!	#NULL!	#NULL!	#NULL!	#NULL!	#NULL!	#NULL!	512	517	1	2	8	2	8	8	2	8	1	8	2	8	2	8	8	8	8	1	1	1	1	0	0	2
A927971402	A927971	2010	1	1	1	A927	2	54	#NULL!	4	4	1	2	4735.98	3769.38	8103.92	#NULL!	5955.34	5479.19	#NULL!	8480.88	#NULL!	#NULL!	512	517	1	2	8	2	8	8	2	8	1	8	2	8	2	8	8	8	8	1	1	1	1	0	0	2
A927971404	A927971	2010	1	1	1	A927	1	14	#NULL!	4	4	1	#NULL!	4735.98	4705.07	#NULL!	8723.43	6375.68	5982.43	#NULL!	#NULL!	14022.6	#NULL!	512	517	1	2	8	8	8	8	8	8	1	8	2	8	2	8	8	8	8	1	1	1	1	0	#NULL!	2
A927971801	A927971	2010	1	1	1	A927	1	66	#NULL!	3	3	1	5	4735.98	2460.24	3279.99	#NULL!	2682.02	2335.95	#NULL!	3670.08	#NULL!	#NULL!	512	517	1	2	8	2	8	8	2	8	1	8	2	8	1	1	1	1	2	1	1	1	1	0	0	2
A927971802	A927971	2010	1	1	1	A927	1	34	#NULL!	2	3	3	5	4735.98	7537.95	#NULL!	#NULL!	12350.5	10749.2	#NULL!	#NULL!	#NULL!	#NULL!	512	517	1	2	8	8	8	8	2	8	1	8	2	8	1	1	1	1	2	1	2	1	1	0	0	2
A927971803	A927971	2010	1	1	1	A927	2	30	#NULL!	2	3	3	7	4735.98	5285.77	#NULL!	28062.4	4772.27	5077.25	#NULL!	#NULL!	27907.8	#NULL!	512	517	1	2	8	8	8	8	2	8	1	8	2	8	1	1	2	1	2	1	1	1	1	0	0	2
A927971804	A927971	2010	1	1	1	A927	2	4	52	2	3	1	#NULL!	4735.98	3612.8	#NULL!	#NULL!	3715.45	2987.81	#NULL!	#NULL!	#NULL!	#NULL!	512	517	1	9	9	8	8	8	8	8	8	8	8	8	8	8	8	8	8	8	8	8	8	#NULL!	#NULL!	8
A927971805	A927971	2010	1	1	1	A927	1	2	30	3	3	1	#NULL!	4735.98	3930.03	#NULL!	#NULL!	4024.6	3374.4	#NULL!	#NULL!	#NULL!	#NULL!	512	517	1	8	8	8	8	8	8	8	8	8	8	8	8	8	8	8	8	8	8	8	8	#NULL!	#NULL!	8
A927973401	A927973	2010	1	1	1	A927	1	58	#NULL!	1	2	2	3	4735.98	4251.71	5444.89	#NULL!	6370.37	6013.07	#NULL!	6107.76	#NULL!	#NULL!	512	517	1	1	9	2	8	8	2	8	2	3	1	2	1	1	1	1	2	1	1	1	1	0	0	2
A927973402	A927973	2010	1	1	1	A927	2	53	#NULL!	1	2	1	3	4735.98	3769.38	4051.96	#NULL!	5293.64	4870.39	#NULL!	4240.44	#NULL!	#NULL!	512	517	1	2	8	2	8	8	2	8	1	8	2	8	2	8	8	8	8	1	1	1	2	1	0	2
A927973403	A927973	2010	1	1	1	A927	2	28	#NULL!	1	2	4	1	4735.98	8178.4	#NULL!	#NULL!	10206.6	8453.31	#NULL!	#NULL!	#NULL!	#NULL!	512	517	1	2	8	8	8	8	2	8	1	8	2	8	2	8	8	8	8	1	1	1	1	0	0	1
A927973404	A927973	2010	1	1	1	A927	1	24	#NULL!	1	2	3	7	4735.98	8060.08	#NULL!	30663.2	#NULL!	#NULL!	#NULL!	#NULL!	#NULL!	#NULL!	512	517	1	2	8	8	8	8	2	8	1	8	2	8	2	8	8	8	8	1	1	1	1	0	0	1
A927973501	A927973	2010	1	1	1	A927	1	29	#NULL!	2	3	4	1	4735.98	9049.76	#NULL!	#NULL!	10589.2	11568.3	#NULL!	#NULL!	#NULL!	#NULL!	512	517	1	2	8	8	8	8	2	8	1	8	2	8	2	8	8	8	8	1	1	1	1	0	0	1
A927973502	A927973	2010	1	1	1	A927	2	63	#NULL!	3	3	1	7	4735.98	2871.96	#NULL!	#NULL!	2871.24	2601.65	#NULL!	#NULL!	#NULL!	#NULL!	512	517	1	2	8	2	8	8	2	8	1	8	2	8	2	8	8	8	8	1	1	1	1	0	0	2
A927973801	A927973	2010	1	1	1	A927	2	61	#NULL!	3	2	4	3	4735.98	5743.92	#NULL!	#NULL!	5742.48	5203.3	#NULL!	#NULL!	#NULL!	#NULL!	512	517	1	2	8	1	2	2	1	1	1	8	2	8	2	8	8	8	8	1	1	1	1	0	1	1
A927973904	A927973	2010	1	1	1	A927	2	73	#NULL!	#NULL!	#NULL!	1	3	4735.98	2767.9	#NULL!	#NULL!	2384.46	2382.88	#NULL!	#NULL!	#NULL!	#NULL!	512	517	1	1	9	2	8	8	2	8	1	8	1	2	2	8	8	8	8	1	1	1	1	0	0	2
A927974201	A927974	2010	1	1	1	A927	1	67	#NULL!	4	3	3	7	4735.98	2460.24	3279.99	#NULL!	4023.02	3503.92	#NULL!	3670.08	#NULL!	#NULL!	512	517	1	2	8	2	8	8	2	8	1	8	2	8	2	8	8	8	8	1	1	1	1	0	0	2
A927974202	A927974	2010	1	1	1	A927	2	64	#NULL!	4	3	2	3	4735.98	2871.96	3088.93	#NULL!	4306.86	3902.47	#NULL!	3233.08	#NULL!	#NULL!	512	517	1	2	8	1	2	2	1	2	2	3	2	8	1	1	2	2	2	2	2	1	1	0	1	2
A927974501	A927974	2010	1	1	1	A927	1	66	#NULL!	3	2	3	3	4735.98	4920.49	6559.99	9212.33	2682.02	4671.89	14384.4	7340.15	10049.9	16708.1	512	517	1	2	8	2	8	8	2	8	1	8	2	8	2	8	8	8	8	1	1	1	2	1	0	2
A927975501	A927975	2010	1	1	1	A927	1	28	#NULL!	4	4	4	1	4735.98	9049.76	#NULL!	13788.5	10589.2	11568.3	#NULL!	#NULL!	16980.5	#NULL!	512	517	1	2	8	8	8	8	2	8	1	8	2	8	2	8	8	8	8	1	1	1	1	0	0	1
A927975502	A927975	2010	1	1	1	A927	2	28	#NULL!	4	4	4	1	4735.98	8178.4	#NULL!	#NULL!	7654.94	6339.98	#NULL!	#NULL!	#NULL!	#NULL!	512	517	1	1	9	8	8	8	2	8	1	8	2	8	1	1	1	1	2	1	1	1	1	0	0	1
A928968301	A928968	2010	1	1	1	A928	1	72	#NULL!	4	3	3	3	7605.14	3496.64	11253.2	#NULL!	3789.13	3515.64	#NULL!	11194	#NULL!	#NULL!	512	517	1	2	8	2	8	8	2	8	1	8	1	1	2	8	8	8	8	1	1	1	1	0	0	2
A928968302	A928968	2010	1	1	1	A928	2	64	#NULL!	3	3	1	7	7605.14	4569.03	#NULL!	#NULL!	4567.88	4138.99	#NULL!	#NULL!	#NULL!	#NULL!	512	517	1	2	8	2	8	8	2	8	1	8	2	8	2	8	8	8	8	1	1	1	2	1	0	2
A928968801	A928968	2010	1	1	1	A928	2	79	#NULL!	2	1	#NULL!	#NULL!	7605.14	4874.72	#NULL!	#NULL!	4905.62	5387.34	#NULL!	#NULL!	#NULL!	#NULL!	512	517	1	2	8	2	8	8	1	1	3	3	2	8	2	8	8	8	8	1	1	1	2	1	1	2
A928969101	A928969	2010	1	1	1	A928	1	52	#NULL!	3	4	3	5	7605.14	11873.6	11533.7	13357.6	17461.2	18804.1	19129.8	14409	33287.3	25190.6	512	517	1	2	8	2	8	8	2	8	1	8	2	8	2	8	8	8	8	1	1	1	1	0	0	2
A928969104	A928969	2010	1	1	1	A928	1	18	#NULL!	3	4	3	6	7605.14	8589.26	#NULL!	#NULL!	#NULL!	#NULL!	#NULL!	#NULL!	#NULL!	#NULL!	512	517	1	2	8	8	8	8	8	8	2	3	2	8	2	8	8	8	8	1	1	1	1	0	#NULL!	1
A928971401	A928971	2010	1	1	1	A928	1	29	#NULL!	1	1	4	1	7605.14	14397.3	#NULL!	21936.2	16628.8	18404.1	#NULL!	#NULL!	27014.4	#NULL!	512	517	1	2	8	8	8	8	2	8	1	8	2	8	2	8	8	8	8	1	1	1	1	0	0	2
A928971402	A928971	2010	1	1	1	A928	2	30	#NULL!	1	1	4	7	7605.14	8409.17	#NULL!	#NULL!	7592.25	8077.45	#NULL!	#NULL!	#NULL!	#NULL!	512	517	1	2	8	8	8	8	2	8	1	8	2	8	2	8	8	8	8	1	1	1	1	0	0	1
A928971403	A928971	2010	1	1	1	A928	2	2	35	1	1	1	#NULL!	7605.14	5747.64	#NULL!	#NULL!	5910.94	4753.34	#NULL!	#NULL!	#NULL!	#NULL!	512	517	1	8	8	8	8	8	8	8	8	8	8	8	8	8	8	8	8	8	8	8	8	#NULL!	#NULL!	8
A928971602	A928971	2010	1	1	1	A928	2	63	#NULL!	3	3	1	7	7605.14	15761.3	14742.6	#NULL!	16468.5	16555.9	#NULL!	15430.6	#NULL!	#NULL!	512	517	1	2	8	1	3	2	2	8	2	3	1	2	2	8	8	8	8	1	1	1	1	0	0	2
A928971901	A928971	2010	1	1	1	A928	2	62	#NULL!	4	3	1	6	7605.14	4569.03	4914.21	21574.6	4567.88	4138.99	18964.9	5143.53	20827.5	19137.9	512	517	1	2	8	2	8	8	2	8	1	8	2	8	2	8	8	8	8	1	1	1	1	0	0	2
A928971902	A928971	2010	1	1	1	A928	1	37	#NULL!	2	3	4	1	7605.14	9854.94	#NULL!	#NULL!	11983.8	13273.5	#NULL!	#NULL!	#NULL!	#NULL!	512	517	1	2	8	8	8	8	2	8	1	8	2	8	2	8	8	8	8	1	1	1	1	0	0	2
A928972901	A928972	2010	1	1	1	A928	1	26	#NULL!	1	1	3	7	7605.14	14397.3	#NULL!	#NULL!	16628.8	18404.1	#NULL!	#NULL!	#NULL!	#NULL!	512	517	1	2	8	8	8	8	2	8	1	8	2	8	2	8	8	8	8	1	2	1	1	0	0	1
A928973301	A928973	2010	1	1	1	A928	1	34	#NULL!	3	3	2	5	7605.14	11992.2	#NULL!	33194.3	18156.7	17101	#NULL!	#NULL!	51670.5	#NULL!	512	517	1	2	8	8	8	8	2	8	1	8	2	8	1	2	1	1	2	1	1	1	1	0	0	2
A928973302	A928973	2010	1	1	1	A928	2	34	#NULL!	2	3	3	2	7605.14	8409.17	#NULL!	#NULL!	7592.25	8077.45	#NULL!	#NULL!	#NULL!	#NULL!	512	517	1	2	8	8	8	8	2	8	1	8	2	8	1	2	1	1	1	1	1	1	1	0	0	1
A928973802	A928973	2010	1	1	1	A928	2	50	#NULL!	1	2	1	6	7605.14	11993.5	12892.6	#NULL!	10527.1	9685.43	#NULL!	13492.3	#NULL!	#NULL!	512	517	1	2	8	1	3	2	2	8	1	8	1	2	1	1	1	1	2	1	1	1	1	0	0	2
A928973804	A928973	2010	1	1	1	A928	2	20	#NULL!	1	2	3	7	7605.14	15655	#NULL!	34545.8	16496	19197.5	#NULL!	#NULL!	52213.6	#NULL!	512	517	1	1	2	8	8	8	2	8	2	3	2	8	2	8	8	8	8	1	1	1	1	0	0	2
A928973805	A928973	2010	1	1	1	A928	1	13	#NULL!	1	2	1	#NULL!	7605.14	7485.34	#NULL!	#NULL!	11270.1	10575	#NULL!	#NULL!	#NULL!	#NULL!	512	517	1	1	2	8	8	8	8	8	1	8	1	1	1	2	2	2	2	1	2	1	1	0	#NULL!	2
A928974402	A928974	2010	1	1	1	A928	2	67	#NULL!	3	2	4	7	7605.14	3343.64	#NULL!	#NULL!	6881.46	7362.69	#NULL!	#NULL!	#NULL!	#NULL!	512	517	1	2	8	2	8	8	2	8	1	8	2	8	2	8	8	8	8	1	1	1	1	0	0	2
A928975301	A928975	2010	1	1	1	A928	2	84	#NULL!	2	1	1	7	7605.14	4874.72	#NULL!	#NULL!	4905.62	5387.34	#NULL!	#NULL!	#NULL!	#NULL!	512	517	1	2	8	1	3	2	2	8	2	3	2	8	2	8	8	8	8	1	1	1	2	1	0	2
A928975901	A928975	2010	1	1	1	A928	1	48	#NULL!	2	3	4	6	7605.14	15145.5	12207.5	#NULL!	17353	15111.7	#NULL!	16179.2	#NULL!	#NULL!	512	517	1	2	8	1	3	2	1	2	1	8	1	3	2	8	8	8	8	1	1	1	1	0	1	2
A928975902	A928975	2010	1	1	1	A928	2	44	#NULL!	3	3	3	3	7605.14	8811.29	11214.6	#NULL!	8786.08	8208.08	#NULL!	10430.2	#NULL!	#NULL!	512	517	1	2	8	2	8	8	1	2	1	8	2	8	2	8	8	8	8	1	1	1	1	0	1	2
A928975903	A928975	2010	1	1	1	A928	1	19	#NULL!	3	3	3	6	7605.14	8589.26	#NULL!	54045.3	9314.2	12665.2	#NULL!	#NULL!	53158.7	#NULL!	512	517	1	2	8	8	8	8	2	8	1	8	1	1	1	2	2	2	1	2	2	1	1	0	0	1
A928976601	A928976	2010	1	1	1	A928	1	63	#NULL!	2	2	3	6	7605.14	4878.04	6401.92	#NULL!	4622.6	4892.92	#NULL!	6971.18	#NULL!	#NULL!	512	517	1	2	8	2	8	8	2	8	2	3	2	8	2	8	8	8	8	1	1	1	1	0	0	2
A928977201	A928977	2010	1	1	1	A928	1	33	#NULL!	1	2	4	2	7605.14	11992.2	#NULL!	#NULL!	18156.7	17101	#NULL!	#NULL!	#NULL!	#NULL!	512	517	1	2	8	8	8	8	2	8	1	8	2	8	1	1	2	1	2	1	1	1	1	0	0	2
A928977202	A928977	2010	1	1	1	A928	2	31	#NULL!	1	2	4	1	7605.14	8409.17	#NULL!	29763.2	7592.25	8077.45	#NULL!	#NULL!	29599.1	#NULL!	512	517	1	2	8	8	8	8	2	8	1	8	2	8	2	8	8	8	8	1	1	1	1	0	0	2
A928977203	A928977	2010	1	1	1	A928	1	4	57	1	2	1	#NULL!	7605.14	6252.32	#NULL!	#NULL!	6402.78	5368.36	#NULL!	#NULL!	#NULL!	#NULL!	512	517	1	9	9	8	8	8	8	8	8	8	8	8	8	8	8	8	8	8	8	8	8	#NULL!	#NULL!	8
A928977204	A928977	2010	1	1	1	A928	2	1	23	1	2	1	#NULL!	7605.14	5747.64	#NULL!	#NULL!	5910.94	4753.34	#NULL!	#NULL!	#NULL!	#NULL!	512	517	1	8	8	8	8	8	8	8	8	8	8	8	8	8	8	8	8	8	8	8	8	#NULL!	#NULL!	8
A928978201	A928978	2010	1	1	1	A928	2	58	#NULL!	1	2	2	6	7605.14	6056.4	4993.85	7528.82	5795.88	4489	11390	5207.41	7966.04	12272.3	512	517	1	2	8	2	8	8	2	8	2	3	2	8	2	8	8	8	8	1	1	1	1	0	0	2
A928978601	A928978	2010	1	1	1	A928	1	74	#NULL!	2	1	2	7	7605.14	3496.64	11253.2	#NULL!	3789.13	3515.64	#NULL!	11194	#NULL!	#NULL!	512	517	1	2	8	1	3	2	2	8	2	3	1	2	1	2	1	1	2	1	1	1	1	0	0	2
A928978602	A928978	2010	1	1	1	A928	2	69	#NULL!	2	1	1	7	7605.14	3343.64	#NULL!	#NULL!	3440.73	3681.34	#NULL!	#NULL!	#NULL!	#NULL!	512	517	1	2	8	2	8	8	2	8	1	8	2	8	2	8	8	8	8	1	1	1	1	0	0	2
A929968701	A929968	2010	1	1	1	A929	1	66	#NULL!	1	1	3	7	6105.5	3535	9425.72	13236.7	3853.65	3356.4	20668.2	10546.7	14440.2	24007.1	512	517	1	2	8	2	8	8	2	8	2	3	2	8	2	8	8	8	8	1	1	1	1	0	0	2
A929968702	A929968	2010	1	1	1	A929	2	65	#NULL!	1	1	1	7	6105.5	3019.85	#NULL!	#NULL!	3107.54	3324.85	#NULL!	#NULL!	#NULL!	#NULL!	512	517	1	2	8	2	8	8	2	8	2	3	2	8	2	8	8	8	8	1	1	1	1	0	0	2
A929968903	A929968	2010	1	1	1	A929	2	23	#NULL!	2	3	4	1	6105.5	14590.8	#NULL!	31200.5	15497.5	17338.5	#NULL!	#NULL!	47157.4	#NULL!	512	517	1	1	2	8	8	8	2	8	1	8	2	8	1	2	2	2	1	2	2	1	1	0	0	1
A929968905	A929968	2010	1	1	1	A929	1	18	#NULL!	2	3	2	7	6105.5	7757.5	#NULL!	#NULL!	14020.4	19064.6	#NULL!	#NULL!	#NULL!	#NULL!	512	517	1	2	8	8	8	8	8	8	1	8	1	2	1	2	1	2	1	2	2	1	1	0	#NULL!	1
A929969501	A929969	2010	1	1	1	A929	1	75	#NULL!	4	3	3	2	6105.5	3541.74	11134.6	#NULL!	4184.67	3939.74	#NULL!	11771.5	#NULL!	#NULL!	512	517	1	2	8	2	8	8	2	8	1	8	2	8	2	8	8	8	8	1	1	1	1	0	0	2
A929969502	A929969	2010	1	1	1	A929	2	71	#NULL!	4	3	2	2	6105.5	3977.05	6467.34	#NULL!	3426.1	3423.84	#NULL!	6964.56	#NULL!	#NULL!	512	517	1	2	8	2	8	8	1	2	2	3	1	1	2	8	8	8	8	1	1	1	1	0	1	2
A929969503	A929969	2010	1	1	1	A929	1	37	#NULL!	2	3	3	3	6105.5	8900.62	#NULL!	#NULL!	10823.4	11988.1	#NULL!	#NULL!	#NULL!	#NULL!	512	517	1	2	8	8	8	8	2	8	1	8	2	8	2	8	8	8	8	1	1	1	1	0	0	2
A929970201	A929970	2010	1	1	1	A929	1	43	#NULL!	1	2	3	3	6105.5	8563.73	13611.6	37222.6	9014.67	11770.7	55479.4	17204.7	44628	76641.3	512	517	1	2	8	2	8	8	2	8	1	8	2	8	2	8	8	8	8	1	1	1	1	0	0	2
A929970202	A929970	2010	1	1	1	A929	2	43	#NULL!	1	2	4	7	6105.5	7958.03	#NULL!	#NULL!	7935.26	7413.23	#NULL!	#NULL!	#NULL!	#NULL!	512	517	1	2	8	2	8	8	2	8	1	8	2	8	2	8	8	8	8	1	1	1	1	0	0	2
A929970203	A929970	2010	1	1	1	A929	2	66	#NULL!	3	2	1	7	6105.5	3019.85	6502.03	#NULL!	3107.54	3324.85	#NULL!	6736.96	#NULL!	#NULL!	512	517	1	2	8	1	3	2	2	8	1	8	1	1	2	8	8	8	8	1	1	1	1	0	0	2
A929970204	A929970	2010	1	1	1	A929	1	6	74	1	2	1	#NULL!	6105.5	4537.45	#NULL!	#NULL!	4695.99	4627.63	#NULL!	#NULL!	#NULL!	#NULL!	512	517	1	2	8	8	8	8	8	8	8	8	8	8	2	8	8	8	8	1	1	1	1	0	#NULL!	8
A929970205	A929970	2010	1	1	1	A929	2	3	43	1	2	1	#NULL!	6105.5	5191.05	#NULL!	#NULL!	5338.54	4293.04	#NULL!	#NULL!	#NULL!	#NULL!	512	517	1	8	8	8	8	8	8	8	8	8	8	8	8	8	8	8	8	8	8	8	8	#NULL!	#NULL!	8
A929970401	A929970	2010	1	1	1	A929	2	61	#NULL!	3	2	1	6	6105.5	4126.57	4438.33	#NULL!	4125.54	3738.18	#NULL!	4645.45	#NULL!	#NULL!	512	517	1	2	8	2	8	8	2	8	2	3	2	8	2	8	8	8	8	1	1	1	1	0	0	2
A929970402	A929970	2010	1	1	1	A929	2	28	#NULL!	2	2	3	3	6105.5	11751.1	#NULL!	15126.1	10999	9109.6	#NULL!	#NULL!	16918.2	#NULL!	512	517	1	2	8	8	8	8	2	8	1	8	2	8	2	8	8	8	8	1	1	1	1	0	0	2
A929971201	A929971	2010	1	1	1	A929	1	70	#NULL!	3	2	2	7	6105.5	3158.04	5081.74	#NULL!	3422.21	3175.19	#NULL!	5054.98	#NULL!	#NULL!	512	517	1	2	8	2	8	8	2	8	1	8	2	8	2	8	8	8	8	1	1	1	1	0	0	2
A929971202	A929971	2010	1	1	1	A929	2	65	#NULL!	3	2	1	7	6105.5	3019.85	4334.69	11895.1	3107.54	3324.85	19020.1	4491.31	11786	19452.7	512	517	1	2	8	2	8	8	2	8	1	8	1	3	2	8	8	8	8	1	1	1	1	0	0	2
A929971401	A929971	2010	1	1	1	A929	1	44	#NULL!	2	2	3	2	6105.5	8563.73	#NULL!	24815.1	9014.67	11770.7	#NULL!	#NULL!	44628	#NULL!	512	517	1	2	8	2	8	8	2	8	1	8	2	8	2	8	8	8	8	1	1	1	1	0	0	2
A929971402	A929971	2010	1	1	1	A929	2	40	#NULL!	2	2	3	5	6105.5	7958.03	#NULL!	#NULL!	7935.26	7413.23	#NULL!	#NULL!	#NULL!	#NULL!	512	517	1	2	8	2	8	8	2	8	1	8	2	8	2	8	8	8	8	1	1	1	1	0	0	2
A929971404	A929971	2010	1	1	1	A929	1	15	#NULL!	2	2	1	7	6105.5	7757.5	#NULL!	#NULL!	8412.24	11438.7	#NULL!	#NULL!	#NULL!	#NULL!	512	517	1	2	8	8	8	8	8	8	1	8	3	8	1	2	1	2	1	1	2	1	1	0	#NULL!	2
A929972001	A929972	2010	1	1	1	A929	1	47	#NULL!	1	1	3	7	6105.5	13678.8	22050.7	#NULL!	#NULL!	#NULL!	#NULL!	#NULL!	#NULL!	#NULL!	512	517	1	2	8	1	2	2	2	8	1	8	2	8	2	8	8	8	8	1	1	1	2	1	0	2
A929972002	A929972	2010	1	1	1	A929	2	44	#NULL!	1	1	2	5	6105.5	7958.03	#NULL!	#NULL!	#NULL!	#NULL!	#NULL!	#NULL!	#NULL!	#NULL!	512	517	1	2	8	2	8	8	1	1	1	8	2	8	2	8	8	8	8	1	1	1	1	0	1	2
A929972003	A929972	2010	1	1	1	A929	1	22	#NULL!	1	1	3	3	6105.5	11581.1	#NULL!	#NULL!	#NULL!	#NULL!	#NULL!	#NULL!	#NULL!	#NULL!	512	517	1	2	8	8	8	8	2	8	1	8	2	8	2	8	8	8	8	1	1	1	1	0	0	2
A929972004	A929972	2010	1	1	1	A929	2	17	#NULL!	1	1	2	7	6105.5	12811.1	#NULL!	10590.5	#NULL!	#NULL!	#NULL!	#NULL!	#NULL!	#NULL!	512	517	1	2	8	8	8	8	8	8	1	8	2	8	2	8	8	8	8	1	1	1	1	0	#NULL!	2
A929972502	A929972	2010	1	1	1	A929	2	47	#NULL!	1	2	3	2	6105.5	8215.56	8437.45	31982.8	#NULL!	#NULL!	16767.7	#NULL!	#NULL!	#NULL!	512	517	1	2	8	1	2	2	2	8	1	8	1	1	2	8	8	8	8	1	1	1	1	0	0	2
A929972503	A929972	2010	1	1	1	A929	2	21	#NULL!	1	2	3	3	6105.5	7295.42	#NULL!	#NULL!	12398	13870.8	#NULL!	#NULL!	#NULL!	#NULL!	512	517	1	2	8	8	8	8	2	8	2	3	1	1	2	8	8	8	8	1	1	1	1	0	0	2
A929972504	A929972	2010	1	1	1	A929	2	19	#NULL!	2	2	3	6	6105.5	12811.1	#NULL!	#NULL!	15718.6	12303.8	#NULL!	#NULL!	#NULL!	#NULL!	512	517	1	1	2	8	8	8	1	1	2	3	1	1	1	1	1	1	2	1	1	1	1	0	1	1
A929972505	A929972	2010	1	1	1	A929	1	12	#NULL!	1	2	1	#NULL!	6105.5	6760.48	#NULL!	#NULL!	8143.02	7640.76	#NULL!	#NULL!	#NULL!	#NULL!	512	517	1	2	8	8	8	8	8	8	1	8	2	8	2	8	8	8	8	1	1	1	1	0	#NULL!	1
A929972901	A929972	2010	1	1	1	A929	1	78	#NULL!	4	4	3	7	6105.5	7083.48	24562.8	#NULL!	8369.34	7879.48	#NULL!	27819.3	#NULL!	#NULL!	512	517	1	2	8	2	8	8	2	8	1	8	2	8	2	8	8	8	8	1	1	1	1	0	0	2
A929972902	A929972	2010	1	1	1	A929	2	78	#NULL!	4	4	1	7	6105.5	8805.34	#NULL!	#NULL!	8861.15	9731.29	#NULL!	#NULL!	#NULL!	#NULL!	512	517	1	2	8	1	2	2	2	8	1	8	2	8	2	8	8	8	8	1	1	1	1	0	0	2
A929973501	A929973	2010	1	1	1	A929	1	47	#NULL!	1	2	3	5	6105.5	13678.8	11025.3	#NULL!	#NULL!	#NULL!	#NULL!	#NULL!	#NULL!	#NULL!	512	517	1	2	8	2	8	8	2	8	1	8	2	8	2	8	8	8	8	1	1	1	1	0	0	2
A929973502	A929973	2010	1	1	1	A929	2	41	#NULL!	2	2	3	6	6105.5	7958.03	10128.6	33504.3	15870.5	9884.31	45256.5	18840.4	40480	46855.4	512	517	1	2	8	1	2	2	2	8	1	8	2	8	2	8	8	8	8	1	1	1	1	0	0	2
A929973503	A929973	2010	1	1	1	A929	1	11	#NULL!	2	2	1	#NULL!	6105.5	6760.48	#NULL!	#NULL!	6107.26	7640.76	#NULL!	#NULL!	#NULL!	#NULL!	512	517	1	1	2	8	8	8	8	8	8	8	8	8	1	2	2	2	1	2	2	1	2	1	#NULL!	8
A929973504	A929973	2010	1	1	1	A929	2	7	#NULL!	1	2	1	#NULL!	6105.5	4099.46	#NULL!	#NULL!	4158.67	6237.22	#NULL!	#NULL!	#NULL!	#NULL!	512	517	1	2	8	8	8	8	8	8	8	8	8	8	1	2	2	2	2	1	2	1	1	0	#NULL!	8
A929973701	A929973	2010	1	1	1	A929	2	76	#NULL!	1	1	1	7	6105.5	4402.67	20117.7	#NULL!	4430.57	4865.65	#NULL!	20552.7	#NULL!	#NULL!	512	517	1	2	8	2	8	8	2	8	1	8	2	8	2	8	8	8	8	1	1	1	1	0	0	2
A929974201	A929974	2010	1	1	1	A929	1	62	#NULL!	3	3	2	6	6105.5	6608.5	11564	#NULL!	6262.44	6628.66	#NULL!	12592.2	#NULL!	#NULL!	512	517	1	2	8	2	8	8	2	8	1	8	2	8	2	8	8	8	8	1	1	1	1	0	0	2
A929974202	A929974	2010	1	1	1	A929	2	58	#NULL!	3	3	2	5	6105.5	8204.88	#NULL!	20399.2	7851.94	6081.44	#NULL!	#NULL!	21583.9	#NULL!	512	517	1	1	1	1	2	2	2	8	1	8	2	8	1	1	2	2	1	1	1	1	2	1	0	2
A929974902	A929974	2010	1	1	1	A929	2	44	#NULL!	1	2	3	6	6105.5	7958.03	20257.3	#NULL!	7935.26	7413.23	#NULL!	18840.4	#NULL!	#NULL!	512	517	1	2	8	2	8	8	2	8	1	8	2	8	2	8	8	8	8	1	1	1	1	0	0	2
A929974903	A929974	2010	1	1	1	A929	1	8	#NULL!	1	2	1	#NULL!	6105.5	4537.45	#NULL!	#NULL!	4695.99	4627.63	#NULL!	#NULL!	#NULL!	#NULL!	512	517	1	1	2	8	8	8	8	8	8	8	8	8	1	2	2	2	1	1	2	1	1	0	#NULL!	8
A929974904	A929974	2010	1	1	1	A929	2	6	82	1	2	1	#NULL!	6105.5	4099.46	#NULL!	#NULL!	4158.67	4677.91	#NULL!	#NULL!	#NULL!	#NULL!	512	517	1	1	2	8	8	8	8	8	8	8	8	8	1	1	1	1	2	1	2	1	1	0	#NULL!	8
A929976101	A929976	2010	1	1	1	A929	1	57	#NULL!	2	3	3	1	6105.5	12218.1	11735.2	#NULL!	9153.26	12959.8	#NULL!	13163.9	#NULL!	#NULL!	512	517	1	2	8	2	8	8	2	8	1	8	2	8	2	8	8	8	8	1	1	1	1	0	0	2
A929976102	A929976	2010	1	1	1	A929	2	53	#NULL!	2	3	3	3	6105.5	10832.1	8733.09	#NULL!	7606.17	10497	#NULL!	9139.31	#NULL!	#NULL!	512	517	1	2	8	1	2	2	2	8	1	8	3	8	2	8	8	8	8	1	1	1	1	0	0	2
A929977501	A929977	2010	1	1	1	A929	1	68	#NULL!	1	1	1	7	6105.5	3535	4712.86	#NULL!	3853.65	3356.4	#NULL!	5273.35	#NULL!	#NULL!	512	517	1	1	2	2	8	8	2	8	1	8	2	8	1	1	1	1	2	1	1	1	1	0	0	2
A929977502	A929977	2010	1	1	1	A929	2	68	#NULL!	2	1	1	7	6105.5	3019.85	4334.69	11895.1	3107.54	3324.85	19020.1	4491.31	11786	19452.7	512	517	1	2	8	2	8	8	2	8	2	3	2	8	1	1	1	1	2	1	2	1	1	0	0	2
A929978801	A929978	2010	1	1	1	A929	1	54	#NULL!	3	4	3	2	6105.5	10723.8	#NULL!	24128.2	12337.5	10943	#NULL!	#NULL!	30063.9	#NULL!	512	517	1	2	8	1	2	2	2	8	1	8	2	8	2	8	8	8	8	1	1	1	1	0	0	2
A929978802	A929978	2010	1	1	1	A929	2	52	#NULL!	3	4	3	3	6105.5	5416.04	11644.1	#NULL!	5704.63	5248.51	#NULL!	12185.8	#NULL!	#NULL!	512	517	1	2	8	2	8	8	1	1	1	8	2	8	2	8	8	8	8	1	1	1	1	0	1	2
A929979201	A929979	2010	1	1	1	A929	2	70	#NULL!	3	2	2	7	6105.5	5302.74	#NULL!	#NULL!	4568.14	4279.8	#NULL!	#NULL!	#NULL!	#NULL!	512	517	1	2	8	1	3	2	2	8	2	3	2	8	2	8	8	8	8	1	1	1	1	0	0	2
A929979203	A929979	2010	1	1	1	A929	1	39	#NULL!	1	2	3	3	6105.5	11867.5	#NULL!	42169.7	14431.1	14985.1	#NULL!	#NULL!	56926.9	#NULL!	512	517	1	2	8	8	8	8	2	8	1	8	2	8	1	1	1	1	2	1	1	1	1	0	0	2
A929979204	A929979	2010	1	1	1	A929	2	33	#NULL!	1	2	3	7	6105.5	10126.5	#NULL!	#NULL!	9142.72	9119.06	#NULL!	#NULL!	#NULL!	#NULL!	512	517	1	1	1	8	8	8	1	1	1	8	2	8	1	1	2	2	2	1	1	1	1	0	1	2
A929979206	A929979	2010	1	1	1	A929	2	4	51	1	2	1	#NULL!	6105.5	5191.05	#NULL!	#NULL!	5338.54	5366.3	#NULL!	#NULL!	#NULL!	#NULL!	512	517	1	2	8	8	8	8	8	8	8	8	8	8	8	8	8	8	8	8	8	8	8	#NULL!	#NULL!	8
A930970301	A930970	2010	1	1	1	A930	1	75	#NULL!	3	1	1	6	7957.16	4615.87	#NULL!	#NULL!	5453.79	5134.58	#NULL!	#NULL!	#NULL!	#NULL!	512	517	1	2	8	1	3	2	2	8	3	3	1	1	1	1	2	2	2	1	1	1	2	1	0	2
A930970302	A930970	2010	1	1	1	A930	2	71	#NULL!	3	1	1	7	7957.16	5183.21	#NULL!	88238.1	4465.17	4462.22	#NULL!	#NULL!	98288.8	#NULL!	512	517	1	2	8	1	3	2	2	8	1	8	2	8	1	1	1	1	2	1	1	1	1	0	0	2
A930971201	A930971	2010	1	1	1	A930	1	33	#NULL!	1	1	3	3	7957.16	9410.46	#NULL!	#NULL!	#NULL!	#NULL!	#NULL!	#NULL!	#NULL!	#NULL!	512	517	1	1	2	8	8	8	2	8	1	8	2	8	1	1	2	1	2	1	1	1	1	0	0	2
A930971202	A930971	2010	1	1	1	A930	2	30	#NULL!	1	1	4	7	7957.16	6598.81	#NULL!	23355.6	11915.5	9507.75	#NULL!	#NULL!	23226.9	#NULL!	512	517	1	2	8	8	8	8	2	8	1	8	1	1	1	1	1	1	2	1	1	1	1	0	0	1
A930971203	A930971	2010	1	1	1	A930	2	2	27	1	1	1	#NULL!	7957.16	4510.26	#NULL!	#NULL!	4638.4	5595.03	#NULL!	#NULL!	#NULL!	#NULL!	512	517	1	8	8	8	8	8	8	8	8	8	8	8	8	8	8	8	8	8	8	8	8	#NULL!	#NULL!	8
A930971301	A930971	2010	1	1	1	A930	1	41	#NULL!	2	3	3	5	7957.16	9920.82	#NULL!	43121.3	10443.2	13636	#NULL!	#NULL!	51700.2	#NULL!	512	517	1	2	8	2	8	8	2	8	1	8	1	1	2	8	8	8	8	1	1	1	1	0	0	2
A930971302	A930971	2010	1	1	1	A930	1	39	#NULL!	2	3	3	5	7957.16	10311.1	#NULL!	#NULL!	12538.5	13887.9	#NULL!	#NULL!	#NULL!	#NULL!	512	517	1	2	8	8	8	8	1	1	1	8	2	8	1	1	2	1	2	1	1	1	1	0	1	2
A930971304	A930971	2010	1	1	1	A930	2	66	#NULL!	4	3	1	3	7957.16	3498.4	7532.41	#NULL!	3599.99	3851.74	#NULL!	7804.56	#NULL!	#NULL!	512	517	1	2	8	1	3	2	1	1	1	8	2	8	1	1	2	1	2	1	1	1	2	1	1	2
A930972001	A930972	2010	1	1	1	A930	2	74	#NULL!	3	2	1	7	7957.16	3455.47	5619.17	#NULL!	5953.56	5949.63	#NULL!	6051.17	#NULL!	#NULL!	512	517	1	2	8	1	2	1	2	8	1	8	1	1	1	1	2	1	2	1	1	1	1	0	0	2
A930972002	A930972	2010	1	1	1	A930	1	34	#NULL!	1	2	4	5	7957.16	9410.46	#NULL!	#NULL!	#NULL!	#NULL!	#NULL!	#NULL!	#NULL!	#NULL!	512	517	1	2	8	8	8	8	2	8	1	8	2	8	2	8	8	8	8	1	1	1	1	0	0	1
A930972601	A930972	2010	1	1	1	A930	2	74	#NULL!	1	1	1	6	7957.16	3455.47	#NULL!	85379.9	#NULL!	#NULL!	#NULL!	#NULL!	#NULL!	#NULL!	512	517	1	2	8	1	3	2	2	8	1	8	2	8	1	1	1	1	2	2	2	1	1	0	0	2
A930973401	A930973	2010	1	1	1	A930	1	64	#NULL!	2	2	1	7	7957.16	3827.87	5023.68	5605.85	3627.42	3839.55	10461.1	5470.39	6214.53	10752.4	512	517	1	2	8	2	8	8	2	8	1	8	2	8	1	1	2	1	2	1	1	1	1	0	0	2
A930973501	A930973	2010	1	1	1	A930	1	51	#NULL!	2	3	3	1	7957.16	9317.37	9050.67	#NULL!	#NULL!	#NULL!	#NULL!	#NULL!	#NULL!	#NULL!	512	517	1	2	8	2	8	8	2	8	1	8	2	8	1	1	1	1	2	1	1	1	1	0	0	2
A930973502	A930973	2010	1	1	1	A930	2	53	#NULL!	3	3	2	7	7957.16	4705.74	5058.51	#NULL!	9912.96	9120.37	#NULL!	10587.6	#NULL!	#NULL!	512	517	1	2	8	1	1	2	1	2	1	8	1	1	1	1	1	1	2	1	1	1	1	0	1	2
A930973503	A930973	2010	1	1	1	A930	1	23	#NULL!	3	3	3	7	7957.16	10062.3	#NULL!	#NULL!	19634.5	27356.3	#NULL!	#NULL!	#NULL!	#NULL!	512	517	1	2	8	8	8	8	2	8	1	8	1	1	1	2	1	1	1	1	1	1	1	0	0	1
A930973504	A930973	2010	1	1	1	A930	2	20	#NULL!	3	3	4	1	7957.16	6338.65	#NULL!	27108.6	#NULL!	#NULL!	#NULL!	#NULL!	#NULL!	#NULL!	512	517	1	2	8	8	8	8	2	8	1	8	2	8	1	1	1	1	2	1	1	1	1	0	0	1
A930976202	A930976	2010	1	1	1	A930	1	19	#NULL!	2	2	2	3	7957.16	15995	#NULL!	42410.2	#NULL!	#NULL!	#NULL!	#NULL!	#NULL!	#NULL!	512	517	1	1	2	8	8	8	2	8	1	8	2	8	1	2	2	2	2	2	1	1	1	0	0	1
A930976801	A930976	2010	1	1	1	A930	1	62	#NULL!	2	2	2	7	7957.16	3827.87	5023.68	#NULL!	3627.42	3839.55	#NULL!	5470.39	#NULL!	#NULL!	512	517	1	2	8	1	3	2	2	8	2	3	2	8	2	8	8	8	8	1	1	1	1	0	0	2
A930976802	A930976	2010	1	1	1	A930	2	56	#NULL!	2	2	1	6	7957.16	4752.55	3918.75	#NULL!	4548.12	3522.58	#NULL!	4086.34	#NULL!	#NULL!	512	517	1	2	8	2	8	8	2	8	1	8	2	8	1	1	1	1	2	1	1	1	1	0	0	2
A930976803	A930976	2010	1	1	1	A930	1	32	#NULL!	2	2	3	2	7957.16	9410.46	#NULL!	52096.1	15418.5	13419.4	#NULL!	#NULL!	68003.4	#NULL!	512	517	1	2	8	8	8	8	2	8	1	8	2	8	1	1	1	1	2	1	1	1	1	0	0	2
A930976804	A930976	2010	1	1	1	A930	2	35	#NULL!	2	2	3	2	7957.16	5383.62	#NULL!	#NULL!	5533.1	5466.5	#NULL!	#NULL!	#NULL!	#NULL!	512	517	1	2	8	8	8	8	2	8	1	8	1	1	2	8	8	8	8	1	1	1	1	0	0	2
A930976805	A930976	2010	1	1	1	A930	2	7	#NULL!	2	2	1	#NULL!	7957.16	3561.83	#NULL!	#NULL!	3613.27	4064.42	#NULL!	#NULL!	#NULL!	#NULL!	512	517	1	2	8	8	8	8	8	8	8	8	8	8	2	8	8	8	8	1	1	1	1	0	#NULL!	8
A930976806	A930976	2010	1	1	1	A930	1	2	33	2	2	1	#NULL!	7957.16	4906.29	#NULL!	#NULL!	5024.36	4212.63	#NULL!	#NULL!	#NULL!	#NULL!	512	517	1	8	8	8	8	8	8	8	8	8	8	8	8	8	8	8	8	8	8	8	8	#NULL!	#NULL!	8
A930977401	A930977	2010	1	1	1	A930	1	72	#NULL!	1	1	1	6	7957.16	2743.87	#NULL!	#NULL!	2973.39	2758.77	#NULL!	#NULL!	#NULL!	#NULL!	512	517	1	2	8	2	8	8	2	8	1	8	2	8	1	2	2	2	2	2	1	1	2	1	0	2
A930977901	A930977	2010	1	1	1	A930	2	66	#NULL!	1	1	1	7	7957.16	2623.8	3766.2	5167.55	2699.99	2888.81	8262.85	3902.28	5120.14	8450.77	512	517	1	2	8	1	3	2	2	8	2	3	1	1	1	1	1	1	2	1	1	1	1	0	0	2
A930979201	A930979	2010	1	1	1	A930	1	62	#NULL!	4	4	2	5	7957.16	4784.84	5023.68	#NULL!	6045.71	6399.25	#NULL!	5470.39	#NULL!	#NULL!	512	517	1	2	8	2	8	8	2	8	1	8	2	8	2	8	8	8	8	1	1	1	1	0	0	2
A930979202	A930979	2010	1	1	1	A930	2	60	#NULL!	4	4	2	7	7957.16	4481.73	3856.25	#NULL!	5974.14	5413.21	#NULL!	4036.21	#NULL!	#NULL!	512	517	1	2	8	2	8	8	2	8	1	8	2	8	2	8	8	8	8	1	1	1	1	0	0	1
A930979203	A930979	2010	1	1	1	A930	2	31	#NULL!	4	4	4	1	7957.16	8248.51	#NULL!	#NULL!	9929.59	10564.2	#NULL!	#NULL!	#NULL!	#NULL!	512	517	1	2	8	8	8	8	2	8	1	8	1	1	1	2	2	2	2	2	1	1	1	0	0	1
A930979205	A930979	2010	1	1	1	A930	1	30	#NULL!	4	4	3	5	7957.16	11763.1	#NULL!	55608.9	#NULL!	#NULL!	#NULL!	#NULL!	#NULL!	#NULL!	512	517	1	2	8	8	8	8	2	8	1	8	2	8	2	8	8	8	8	1	1	1	1	0	0	2
A931965001	A931965	2010	1	1	2	A931	1	39	#NULL!	2	2	4	2	3504.05	5108.22	#NULL!	#NULL!	6211.71	6880.18	#NULL!	#NULL!	#NULL!	#NULL!	501	501	1	2	8	8	8	8	2	8	1	8	2	8	2	8	8	8	8	1	1	1	1	0	0	1
A931965002	A931965	2010	1	1	2	A931	2	38	#NULL!	2	2	4	7	3504.05	3556.13	#NULL!	#NULL!	3654.87	3610.88	#NULL!	#NULL!	#NULL!	#NULL!	501	501	1	2	8	8	8	8	2	8	1	8	1	2	2	8	8	8	8	1	1	1	1	0	0	2
A931965003	A931965	2010	1	1	2	A931	1	6	76	2	2	1	#NULL!	3504.05	2604.12	#NULL!	#NULL!	2695.11	2655.88	#NULL!	#NULL!	#NULL!	#NULL!	501	501	1	2	8	8	8	8	8	8	8	8	8	8	2	8	8	8	8	1	1	1	1	0	#NULL!	8
A931965004	A931965	2010	1	1	2	A931	1	4	48	2	2	1	#NULL!	3504.05	3240.83	#NULL!	#NULL!	3318.82	2782.64	#NULL!	#NULL!	#NULL!	#NULL!	501	501	1	2	8	8	8	8	8	8	8	8	8	8	8	8	8	8	8	8	8	8	8	#NULL!	#NULL!	8
A931966401	A931966	2010	1	1	2	A931	1	50	#NULL!	2	2	3	7	3504.05	12309.1	11956.8	13847.6	#NULL!	#NULL!	19831.5	#NULL!	#NULL!	#NULL!	501	501	1	2	8	2	8	8	2	8	1	8	2	8	2	8	8	8	8	1	1	1	1	0	0	2
A931967202	A931967	2010	1	1	2	A931	2	42	#NULL!	4	4	4	7	3504.05	9134.5	#NULL!	19228.7	9108.36	5672.77	#NULL!	#NULL!	15488.1	#NULL!	501	501	1	1	2	2	8	8	2	8	1	8	1	1	1	1	2	1	2	1	1	1	1	0	0	2
A931967203	A931967	2010	1	1	2	A931	1	9	#NULL!	4	4	1	#NULL!	3504.05	2604.12	#NULL!	#NULL!	2695.11	3541.17	#NULL!	#NULL!	#NULL!	#NULL!	501	501	1	2	8	8	8	8	8	8	8	8	8	8	2	8	8	8	8	1	1	1	1	0	#NULL!	8
A931967204	A931967	2010	1	1	2	A931	2	7	#NULL!	4	4	1	#NULL!	3504.05	2352.75	#NULL!	#NULL!	2386.73	3579.65	#NULL!	#NULL!	#NULL!	#NULL!	501	501	1	1	9	8	8	8	8	8	8	8	8	8	1	1	2	2	2	1	1	1	1	0	#NULL!	8
A931967502	A931967	2010	1	1	2	A931	2	36	#NULL!	3	3	4	7	3504.05	7112.26	#NULL!	12278.5	7309.74	4814.5	#NULL!	#NULL!	11210	#NULL!	501	501	1	1	2	8	8	8	2	8	1	8	2	8	1	2	1	1	2	1	1	1	1	0	0	2
A931967503	A931967	2010	1	1	2	A931	2	7	#NULL!	3	3	1	#NULL!	3504.05	2352.75	#NULL!	#NULL!	2386.73	3579.65	#NULL!	#NULL!	#NULL!	#NULL!	501	501	1	2	8	8	8	8	8	8	8	8	8	8	1	2	1	1	2	1	1	1	1	0	#NULL!	8
A931967504	A931967	2010	1	1	2	A931	2	4	58	3	3	1	#NULL!	3504.05	2979.23	#NULL!	#NULL!	3063.88	3285.13	#NULL!	#NULL!	#NULL!	#NULL!	501	501	1	2	8	8	8	8	8	8	8	8	8	8	8	8	8	8	8	8	8	8	8	#NULL!	#NULL!	8
A931967702	A931967	2010	1	1	2	A931	2	51	#NULL!	#NULL!	#NULL!	3	7	3504.05	6216.71	6682.76	25668.1	#NULL!	#NULL!	18815.4	#NULL!	#NULL!	#NULL!	501	501	1	2	8	2	8	8	2	8	1	8	2	8	2	8	8	8	8	1	1	1	1	0	0	2
A931967703	A931967	2010	1	1	2	A931	1	23	#NULL!	#NULL!	#NULL!	3	7	3504.05	13293.2	#NULL!	#NULL!	#NULL!	#NULL!	#NULL!	#NULL!	#NULL!	#NULL!	501	501	1	1	2	8	8	8	2	8	1	8	1	1	1	1	1	1	1	1	1	1	1	0	0	2
A931968102	A931968	2010	1	1	2	A931	2	37	#NULL!	4	4	4	1	3504.05	3556.13	#NULL!	#NULL!	3654.87	3610.88	#NULL!	#NULL!	#NULL!	#NULL!	501	501	1	1	2	8	8	8	2	8	1	8	2	8	1	1	2	2	2	1	1	1	1	0	0	2
A931968103	A931968	2010	1	1	2	A931	1	9	#NULL!	4	4	1	#NULL!	3504.05	2604.12	#NULL!	#NULL!	2695.11	2655.88	#NULL!	#NULL!	#NULL!	#NULL!	501	501	1	1	9	8	8	8	8	8	8	8	8	8	1	1	2	2	2	1	1	1	1	0	#NULL!	8
A931968104	A931968	2010	1	1	2	A931	2	6	74	4	4	1	#NULL!	3504.05	2352.75	#NULL!	#NULL!	2386.73	2684.73	#NULL!	#NULL!	#NULL!	#NULL!	501	501	1	2	8	8	8	8	8	8	8	8	8	8	2	8	8	8	8	1	1	1	1	0	#NULL!	8
A931969301	A931969	2010	1	1	2	A931	1	55	#NULL!	3	3	4	2	3504.05	4674.8	#NULL!	#NULL!	3939.91	4958.58	#NULL!	#NULL!	#NULL!	#NULL!	501	501	1	1	1	2	8	8	2	8	1	8	1	1	1	1	1	1	2	1	1	1	1	0	0	2
A931969302	A931969	2010	1	1	2	A931	2	52	#NULL!	3	3	4	7	3504.05	4144.48	6682.76	#NULL!	3273.98	4016.28	#NULL!	6993.61	#NULL!	#NULL!	501	501	1	2	8	2	8	8	2	8	1	8	1	2	2	8	8	8	8	1	1	1	1	0	0	2
A931969303	A931969	2010	1	1	2	A931	1	21	#NULL!	3	3	3	7	3504.05	8862.15	#NULL!	#NULL!	14511.2	20203.6	#NULL!	#NULL!	#NULL!	#NULL!	501	501	1	2	8	8	8	8	2	8	1	8	2	8	2	8	8	8	8	1	1	1	1	0	0	2
A931970401	A931970	2010	1	1	2	A931	1	63	#NULL!	2	2	4	7	3504.05	3792.73	#NULL!	11108.8	7188.24	7608.6	#NULL!	#NULL!	12315	#NULL!	501	501	1	2	8	2	8	8	2	8	1	8	2	8	2	8	8	8	8	1	1	1	1	0	0	2
A931971301	A931971	2010	1	1	2	A931	2	46	#NULL!	2	3	4	7	3504.05	4715.05	4842.4	#NULL!	5020.52	3769.73	#NULL!	5153.03	#NULL!	#NULL!	501	501	1	2	8	2	8	8	2	8	1	8	2	8	1	2	2	1	1	1	1	1	1	0	0	2
A931971302	A931971	2010	1	1	2	A931	1	45	#NULL!	2	3	4	1	3504.05	7850.52	6327.64	#NULL!	9427.61	7833.01	#NULL!	8386.32	#NULL!	#NULL!	501	501	1	1	2	2	8	8	2	8	1	8	2	8	1	1	2	2	1	1	1	1	1	0	0	2
A931971303	A931971	2010	1	1	2	A931	2	14	#NULL!	3	3	1	#NULL!	3504.05	3448.26	#NULL!	12152.2	3391.56	3344.41	#NULL!	#NULL!	13732.2	#NULL!	501	501	1	2	8	8	8	8	8	8	1	8	2	8	2	8	8	8	8	1	1	1	1	0	#NULL!	2
A931971304	A931971	2010	1	1	2	A931	1	12	#NULL!	3	3	1	#NULL!	3504.05	3879.96	#NULL!	#NULL!	3505.06	3288.87	#NULL!	#NULL!	#NULL!	#NULL!	501	501	1	2	8	8	8	8	8	8	1	8	2	8	1	2	1	1	2	1	2	1	2	1	#NULL!	2
A931971901	A931971	2010	1	1	2	A931	1	44	#NULL!	4	4	4	1	3504.05	4914.87	5207.96	#NULL!	5173.67	6755.43	#NULL!	6582.7	#NULL!	#NULL!	501	501	1	2	8	2	8	8	2	8	1	8	1	1	1	2	1	1	2	1	1	1	1	0	0	2
A931971902	A931971	2010	1	1	2	A931	2	41	#NULL!	4	4	4	1	3504.05	4567.25	5813	19228.7	4554.18	4254.58	25973.5	5406.4	30976.2	26891.1	501	501	1	2	8	1	3	1	1	1	1	8	2	8	1	2	1	1	1	1	1	1	1	0	1	2
A931971903	A931971	2010	1	1	2	A931	2	15	#NULL!	4	4	1	7	3504.05	7352.52	#NULL!	#NULL!	6765.88	5296	#NULL!	#NULL!	#NULL!	#NULL!	501	501	1	2	8	8	8	8	8	8	1	8	2	8	2	8	8	8	8	1	1	1	1	0	#NULL!	2
A931971904	A931971	2010	1	1	2	A931	2	10	#NULL!	4	4	1	#NULL!	3504.05	3448.26	#NULL!	#NULL!	3391.56	3344.41	#NULL!	#NULL!	#NULL!	#NULL!	501	501	1	2	8	8	8	8	8	8	8	8	8	8	1	1	2	1	2	1	1	1	1	0	#NULL!	8
A931972501	A931972	2010	1	1	2	A931	2	75	#NULL!	2	1	1	7	3504.05	2526.77	11545.9	#NULL!	2542.78	2792.48	#NULL!	11795.5	#NULL!	#NULL!	501	501	1	1	2	2	8	8	2	8	3	3	2	8	1	2	2	2	1	2	1	1	1	0	0	2
A931973801	A931973	2010	1	1	2	A931	2	61	#NULL!	4	3	3	6	3504.05	3552.47	2547.23	#NULL!	3551.58	3218.11	#NULL!	2666.1	#NULL!	#NULL!	501	501	1	2	8	2	8	8	2	8	2	3	1	2	2	8	8	8	8	1	1	1	1	0	0	2
A931973803	A931973	2010	1	1	2	A931	2	36	#NULL!	3	3	4	3	3504.05	5334.19	#NULL!	18417.7	5482.31	5416.32	#NULL!	#NULL!	16815	#NULL!	501	501	1	2	8	8	8	8	2	8	1	8	1	1	2	8	8	8	8	1	1	1	1	0	0	2
A931974701	A931974	2010	1	1	2	A931	1	39	#NULL!	3	3	4	2	3504.05	5108.22	#NULL!	12101	#NULL!	#NULL!	#NULL!	#NULL!	#NULL!	#NULL!	501	501	1	2	8	8	8	8	2	8	1	8	2	8	2	8	8	8	8	1	1	1	1	0	0	2
A931974702	A931974	2010	1	1	2	A931	2	36	#NULL!	3	3	4	7	3504.05	3556.13	#NULL!	#NULL!	7309.74	4814.5	#NULL!	#NULL!	#NULL!	#NULL!	501	501	1	1	9	8	8	8	2	8	2	3	1	2	1	2	1	1	2	1	1	1	1	0	0	2
A931974703	A931974	2010	1	1	2	A931	2	10	#NULL!	3	3	1	#NULL!	3504.05	3448.26	#NULL!	#NULL!	3391.56	4459.22	#NULL!	#NULL!	#NULL!	#NULL!	501	501	1	2	8	8	8	8	8	8	8	8	8	8	1	2	1	1	2	1	1	1	1	0	#NULL!	8
A931974704	A931974	2010	1	1	2	A931	1	5	69	3	3	1	#NULL!	3504.05	2604.12	#NULL!	#NULL!	2695.11	3541.17	#NULL!	#NULL!	#NULL!	#NULL!	501	501	1	2	8	8	8	8	8	8	8	8	8	8	8	8	8	8	8	8	8	8	8	#NULL!	#NULL!	8
A931975901	A931975	2010	1	1	2	A931	1	37	#NULL!	1	2	3	2	3504.05	5108.22	#NULL!	12101	6211.71	6880.18	#NULL!	#NULL!	16335.7	#NULL!	501	501	1	2	8	8	8	8	2	8	1	8	2	8	2	8	8	8	8	1	1	1	1	0	0	2
A931975902	A931975	2010	1	1	2	A931	2	45	#NULL!	1	2	4	1	3504.05	4715.05	4842.4	#NULL!	5020.52	3769.73	#NULL!	5153.03	#NULL!	#NULL!	501	501	1	2	8	2	8	8	2	8	1	8	2	8	2	8	8	8	8	1	1	1	1	0	0	2
A931975903	A931975	2010	1	1	2	A931	1	9	#NULL!	1	2	1	#NULL!	3504.05	2604.12	#NULL!	#NULL!	2695.11	2655.88	#NULL!	#NULL!	#NULL!	#NULL!	501	501	1	2	8	8	8	8	8	8	8	8	8	8	2	8	8	8	8	1	1	1	1	0	#NULL!	8
A931975904	A931975	2010	1	1	2	A931	1	4	59	1	2	1	#NULL!	3504.05	3240.83	#NULL!	#NULL!	3318.82	2782.64	#NULL!	#NULL!	#NULL!	#NULL!	501	501	1	2	8	8	8	8	8	8	8	8	8	8	8	8	8	8	8	8	8	8	8	#NULL!	#NULL!	8
A931976802	A931976	2010	1	1	2	A931	1	55	#NULL!	3	3	3	3	3504.05	3506.1	4490.04	11144.3	3939.91	3718.93	5765.59	5036.66	11925.3	6625.65	501	501	1	2	8	2	8	8	2	8	1	8	1	1	2	8	8	8	8	1	1	1	1	0	0	2
A931976803	A931976	2010	1	1	2	A931	2	27	#NULL!	2	3	4	2	3504.05	6744.18	#NULL!	#NULL!	6312.51	5228.16	#NULL!	#NULL!	#NULL!	#NULL!	501	501	1	2	8	8	8	8	2	8	1	8	1	1	2	8	8	8	8	1	1	1	1	0	0	2
A931976804	A931976	2010	1	1	2	A931	1	25	#NULL!	3	3	3	2	3504.05	7462.73	#NULL!	#NULL!	8732.22	9539.59	#NULL!	#NULL!	#NULL!	#NULL!	501	501	1	2	8	8	8	8	2	8	1	8	1	1	2	8	8	8	8	1	1	1	1	0	0	2
A931978601	A931978	2010	1	1	2	A931	1	38	#NULL!	3	3	3	3	3504.05	5108.22	#NULL!	#NULL!	#NULL!	#NULL!	#NULL!	#NULL!	#NULL!	#NULL!	501	501	1	2	8	8	8	8	2	8	1	8	1	1	2	8	8	8	8	1	1	1	1	0	0	2
A931978602	A931978	2010	1	1	2	A931	2	34	#NULL!	3	3	4	2	3504.05	4358.82	#NULL!	#NULL!	7870.74	6280.3	#NULL!	#NULL!	#NULL!	#NULL!	501	501	1	1	2	8	8	8	2	8	1	8	2	8	1	1	2	2	2	1	1	1	1	0	0	1
A931978603	A931978	2010	1	1	2	A931	2	11	#NULL!	3	3	1	#NULL!	3504.05	3448.26	#NULL!	6076.12	3391.56	5016.62	#NULL!	#NULL!	10299.1	#NULL!	501	501	1	2	8	8	8	8	8	8	8	8	8	8	2	8	8	8	8	1	1	1	1	0	#NULL!	8
A931979001	A931979	2010	1	1	2	A931	2	49	#NULL!	1	1	3	5	3504.05	4715.05	#NULL!	#NULL!	5020.52	3769.73	#NULL!	#NULL!	#NULL!	#NULL!	501	501	1	2	8	2	8	8	2	8	1	8	2	8	2	8	8	8	8	1	1	1	1	0	0	2
A931979002	A931979	2010	1	1	2	A931	1	11	#NULL!	1	1	1	#NULL!	3504.05	3879.96	#NULL!	7193.63	3505.06	3288.87	#NULL!	#NULL!	7709.01	#NULL!	501	501	1	2	8	8	8	8	8	8	8	8	8	8	2	8	8	8	8	1	1	1	1	0	#NULL!	8
A932968801	A932968	2010	1	1	2	A932	1	46	#NULL!	3	4	3	2	2817.26	5259.85	8479.03	10558.8	6316.5	5248.11	13103.7	11237.7	19028	17331.2	501	501	1	2	8	2	8	8	2	8	1	8	2	8	2	8	8	8	8	1	1	1	1	0	0	2
A932968802	A932968	2010	1	1	2	A932	2	41	#NULL!	3	4	3	2	2817.26	3060.06	#NULL!	#NULL!	3051.3	2850.57	#NULL!	#NULL!	#NULL!	#NULL!	501	501	1	2	8	2	8	8	2	8	1	8	2	8	2	8	8	8	8	1	1	1	1	0	0	2
A932968803	A932968	2010	1	1	2	A932	1	12	#NULL!	3	4	1	#NULL!	2817.26	2599.57	#NULL!	#NULL!	2348.39	2203.54	#NULL!	#NULL!	#NULL!	#NULL!	501	501	1	2	8	8	8	8	8	8	1	8	2	8	1	1	2	1	2	2	2	1	1	0	#NULL!	1
A932968804	A932968	2010	1	1	2	A932	1	9	#NULL!	4	4	1	#NULL!	2817.26	1744.76	#NULL!	#NULL!	1805.72	1779.44	#NULL!	#NULL!	#NULL!	#NULL!	501	501	1	2	8	8	8	8	8	8	8	8	8	8	2	8	8	8	8	1	1	1	1	0	#NULL!	8
A932969201	A932969	2010	1	1	2	A932	2	45	#NULL!	4	4	4	7	2817.26	6318.17	#NULL!	8198.78	#NULL!	#NULL!	#NULL!	#NULL!	#NULL!	#NULL!	501	501	1	2	8	2	8	8	1	2	1	8	2	8	2	8	8	8	8	1	1	1	1	0	1	2
A932969902	A932969	2010	1	1	2	A932	2	36	#NULL!	4	4	4	7	2817.26	4765.21	#NULL!	8226.58	2448.76	3225.72	#NULL!	#NULL!	7510.71	#NULL!	501	501	1	1	2	8	8	8	2	8	1	8	2	8	1	1	2	1	2	2	1	1	1	0	0	2
A932969903	A932969	2010	1	1	2	A932	2	7	#NULL!	4	4	1	#NULL!	2817.26	1576.34	#NULL!	#NULL!	1599.11	2398.36	#NULL!	#NULL!	#NULL!	#NULL!	501	501	1	2	8	8	8	8	8	8	8	8	8	8	2	8	8	8	8	1	1	1	1	0	#NULL!	8
A932969904	A932969	2010	1	1	2	A932	2	5	69	4	4	1	#NULL!	2817.26	1576.34	#NULL!	#NULL!	1599.11	2398.36	#NULL!	#NULL!	#NULL!	#NULL!	501	501	1	2	8	8	8	8	8	8	8	8	8	8	8	8	8	8	8	8	8	8	8	#NULL!	#NULL!	8
A932970401	A932970	2010	1	1	2	A932	1	66	#NULL!	2	2	3	1	2817.26	1359.29	1812.21	#NULL!	1481.82	1290.62	#NULL!	2027.73	#NULL!	#NULL!	501	501	1	2	8	2	8	8	2	8	3	1	1	2	1	2	2	1	2	1	1	1	1	0	0	2
A932970402	A932970	2010	1	1	2	A932	2	64	#NULL!	2	2	#NULL!	#NULL!	2817.26	1586.77	1706.65	7492.61	1586.37	1437.42	13172.6	1786.29	7233.14	13292.7	501	501	1	1	2	1	2	2	2	8	1	8	2	8	1	2	2	2	2	1	1	1	1	0	0	2
A932970701	A932970	2010	1	1	2	A932	2	51	#NULL!	1	1	3	7	2817.26	2082.6	2238.72	#NULL!	2193.57	2018.18	#NULL!	2342.86	#NULL!	#NULL!	501	501	1	1	2	2	8	8	2	8	2	3	1	1	1	1	2	1	2	1	2	1	1	0	0	2
A932970702	A932970	2010	1	1	2	A932	2	25	#NULL!	1	1	3	7	2817.26	4518.6	#NULL!	#NULL!	4229.38	3502.87	#NULL!	#NULL!	#NULL!	#NULL!	501	501	1	1	2	8	8	8	2	8	1	8	2	8	1	1	2	1	2	1	1	1	1	0	0	1
A932970703	A932970	2010	1	1	2	A932	2	21	#NULL!	1	1	3	7	2817.26	2805.27	#NULL!	#NULL!	3575.49	4000.25	#NULL!	#NULL!	#NULL!	#NULL!	501	501	1	2	8	8	8	8	2	8	1	8	2	8	2	8	8	8	8	1	1	1	1	0	0	2
A932971001	A932971	2010	1	1	2	A932	1	59	#NULL!	4	4	3	3	2817.26	2349.09	3008.33	9955.61	2639.74	2491.69	7725.88	3374.56	10653.2	8878.37	501	501	1	2	8	2	8	8	2	8	1	8	2	8	2	8	8	8	8	1	1	1	1	0	0	2
A932971002	A932971	2010	1	1	2	A932	2	50	#NULL!	4	4	3	3	2817.26	2082.6	2238.72	#NULL!	2193.57	2018.18	#NULL!	2342.86	#NULL!	#NULL!	501	501	1	1	2	2	8	8	2	8	1	8	2	8	1	1	1	1	2	1	1	1	2	1	0	2
A932971003	A932971	2010	1	1	2	A932	2	24	#NULL!	4	4	4	2	2817.26	2805.27	#NULL!	#NULL!	3575.49	4000.25	#NULL!	#NULL!	#NULL!	#NULL!	501	501	1	2	8	8	8	8	2	8	1	8	2	8	2	8	8	8	8	1	1	1	1	0	0	1
A932971004	A932971	2010	1	1	2	A932	2	23	#NULL!	4	4	3	7	2817.26	2805.27	#NULL!	#NULL!	3575.49	4000.25	#NULL!	#NULL!	#NULL!	#NULL!	501	501	1	2	8	8	8	8	2	8	1	8	2	8	1	1	2	1	1	1	1	1	1	0	0	1
A932971501	A932971	2010	1	1	2	A932	2	57	#NULL!	4	4	3	6	2817.26	2103.32	1734.31	#NULL!	2012.84	1558.98	#NULL!	1808.47	#NULL!	#NULL!	501	501	1	2	8	2	8	8	2	8	2	2	1	2	1	2	2	2	2	2	2	1	2	1	0	2
A932971502	A932971	2010	1	1	2	A932	2	28	#NULL!	3	4	4	1	2817.26	4518.6	#NULL!	5816.34	4229.38	3502.87	#NULL!	#NULL!	6505.47	#NULL!	501	501	1	2	8	8	8	8	2	8	1	8	1	1	2	8	8	8	8	1	1	1	1	0	0	2
A932972002	A932972	2010	1	1	2	A932	2	55	#NULL!	4	4	4	7	2817.26	6309.95	3468.61	7844.01	3019.26	4676.93	7911.23	3616.95	8299.54	8524.05	501	501	1	2	8	2	8	8	2	8	2	3	2	8	2	8	8	8	8	1	1	1	1	0	0	2
A932972602	A932972	2010	1	1	2	A932	2	48	#NULL!	3	4	3	3	2817.26	4738.63	3244.4	#NULL!	4485	5051.44	#NULL!	6905.06	#NULL!	#NULL!	501	501	1	2	8	2	8	8	1	2	1	8	1	1	1	2	2	2	1	2	1	1	2	1	1	2
A932972604	A932972	2010	1	1	2	A932	2	12	#NULL!	4	4	1	#NULL!	2817.26	2310.34	#NULL!	4071	3029.79	4481.51	#NULL!	#NULL!	9200.57	#NULL!	501	501	1	1	1	8	8	8	8	8	1	8	2	8	1	2	2	1	1	2	2	1	1	0	#NULL!	1
A932972605	A932972	2010	1	1	2	A932	2	77	#NULL!	4	4	1	7	2817.26	2539.4	7735.75	#NULL!	#NULL!	#NULL!	#NULL!	#NULL!	#NULL!	#NULL!	501	501	1	2	8	2	8	8	2	8	2	3	2	8	2	8	8	8	8	1	1	1	1	0	0	2
A932973101	A932973	2010	1	1	2	A932	1	64	#NULL!	2	3	4	1	2817.26	1694.09	2223.31	#NULL!	1605.37	1699.25	#NULL!	2421.01	#NULL!	#NULL!	501	501	1	2	8	2	8	8	2	8	1	8	2	8	2	8	8	8	8	1	1	1	1	0	0	2
A932973102	A932973	2010	1	1	2	A932	2	59	#NULL!	2	3	4	7	2817.26	2103.32	1734.31	#NULL!	2012.84	1558.98	#NULL!	1808.47	#NULL!	#NULL!	501	501	1	2	8	2	8	8	1	2	2	3	1	1	2	8	8	8	8	1	1	1	1	0	1	2
A932973103	A932973	2010	1	1	2	A932	2	29	#NULL!	2	3	4	7	2817.26	4518.6	#NULL!	#NULL!	4229.38	3502.87	#NULL!	#NULL!	#NULL!	#NULL!	501	501	1	2	8	8	8	8	2	8	1	8	2	8	2	8	8	8	8	1	1	1	1	0	0	2
A932973104	A932973	2010	1	1	2	A932	1	29	#NULL!	2	3	4	7	2817.26	5000.03	#NULL!	15236.4	5850.58	6391.52	#NULL!	#NULL!	18763.6	#NULL!	501	501	1	1	2	8	8	8	2	8	1	8	2	8	2	8	8	8	8	1	1	1	1	0	0	2
A932974501	A932974	2010	1	1	2	A932	2	50	#NULL!	2	2	3	6	2817.26	2082.6	2238.72	#NULL!	2193.57	4036.36	#NULL!	2342.86	#NULL!	#NULL!	501	501	1	2	8	2	8	8	2	8	1	8	2	8	2	8	8	8	8	1	1	1	1	0	0	2
A932974901	A932974	2010	1	1	2	A932	1	57	#NULL!	3	4	4	5	2817.26	2349.09	3008.33	#NULL!	2639.74	2491.69	#NULL!	3374.56	#NULL!	#NULL!	501	501	1	2	8	2	8	8	2	8	1	8	2	8	1	2	1	1	2	1	1	1	1	0	0	2
A932974902	A932974	2010	1	1	2	A932	2	54	#NULL!	3	4	4	1	2817.26	2082.6	2238.72	#NULL!	2193.57	2018.18	#NULL!	2342.86	#NULL!	#NULL!	501	501	1	2	8	2	8	8	2	8	1	8	2	8	2	8	8	8	8	1	1	1	1	0	0	2
A932975901	A932975	2010	1	1	2	A932	1	62	#NULL!	1	1	4	7	2817.26	1694.09	2223.31	#NULL!	1605.37	1699.25	#NULL!	2421.01	#NULL!	#NULL!	501	501	1	2	8	2	8	8	2	8	1	8	2	8	1	1	1	1	1	1	1	1	1	0	0	2
A932975902	A932975	2010	1	1	2	A932	2	60	#NULL!	2	1	3	7	2817.26	1586.77	1706.65	#NULL!	1586.37	1437.42	#NULL!	1786.29	#NULL!	#NULL!	501	501	1	2	8	2	8	8	2	8	1	8	2	8	1	1	1	1	2	1	1	1	1	0	0	2
A932976101	A932976	2010	1	1	2	A932	2	57	#NULL!	1	2	3	7	2817.26	2103.32	3468.61	#NULL!	2012.84	1558.98	#NULL!	3616.95	#NULL!	#NULL!	501	501	1	2	8	2	8	8	2	8	1	8	2	8	2	8	8	8	8	1	1	1	1	0	0	2
A932976102	A932976	2010	1	1	2	A932	2	29	#NULL!	1	2	4	1	2817.26	4518.6	#NULL!	#NULL!	4229.38	3502.87	#NULL!	#NULL!	#NULL!	#NULL!	501	501	1	2	8	8	8	8	1	1	1	8	2	8	2	8	8	8	8	1	1	1	1	0	1	1
A932976104	A932976	2010	1	1	2	A932	1	62	#NULL!	1	2	3	7	2817.26	1694.09	#NULL!	#NULL!	1605.37	1699.25	#NULL!	#NULL!	#NULL!	#NULL!	501	501	1	2	8	2	8	8	2	8	1	8	2	8	2	8	8	8	8	1	1	1	1	0	0	2
A932979501	A932979	2010	1	1	2	A932	1	51	#NULL!	3	3	3	5	2817.26	4123.55	8011.04	13916.8	4744.07	4207.83	13287.1	10008.2	23120.6	17496.8	501	501	1	2	8	2	8	8	2	8	1	8	2	8	2	8	8	8	8	1	1	1	1	0	0	2
A932979502	A932979	2010	1	1	2	A932	2	46	#NULL!	3	3	4	7	2817.26	3159.08	#NULL!	#NULL!	3363.75	2525.72	#NULL!	#NULL!	#NULL!	#NULL!	501	501	1	2	8	2	8	8	2	8	1	8	2	8	2	8	8	8	8	1	1	1	1	0	0	2
A932979503	A932979	2010	1	1	2	A932	2	19	#NULL!	3	3	3	7	2817.26	4926.19	#NULL!	#NULL!	4533.14	3548.32	#NULL!	#NULL!	#NULL!	#NULL!	501	501	1	2	8	8	8	8	2	8	1	8	1	1	2	8	8	8	8	1	1	1	1	0	0	2
A932979504	A932979	2010	1	1	2	A932	2	14	#NULL!	3	3	1	#NULL!	2817.26	2310.34	#NULL!	#NULL!	2272.34	2240.76	#NULL!	#NULL!	#NULL!	#NULL!	501	501	1	2	8	8	8	8	8	8	1	8	2	8	2	8	8	8	8	1	1	1	1	0	#NULL!	1
A932979505	A932979	2010	1	1	2	A932	1	6	78	3	3	1	#NULL!	2817.26	1744.76	#NULL!	#NULL!	1805.72	1779.44	#NULL!	#NULL!	#NULL!	#NULL!	501	501	1	2	8	8	8	8	8	8	8	8	8	8	2	8	8	8	8	1	1	1	1	0	#NULL!	8
A933969102	A933969	2010	1	1	1	A933	2	33	#NULL!	1	1	3	7	9387.4	15709.3	#NULL!	#NULL!	7419.09	11839.8	#NULL!	#NULL!	#NULL!	#NULL!	512	517	1	2	8	8	8	8	2	8	2	3	1	2	2	8	8	8	8	1	1	1	1	0	0	2
A933969103	A933969	2010	1	1	1	A933	2	12	#NULL!	1	1	1	#NULL!	9387.4	6500.78	#NULL!	11454.9	6393.87	9457.5	#NULL!	#NULL!	19416.3	#NULL!	512	517	1	2	8	8	8	8	8	8	1	8	2	8	2	8	8	8	8	1	1	1	1	0	#NULL!	2
A933970101	A933970	2010	1	1	1	A933	1	56	#NULL!	1	1	3	7	9387.4	6609.81	#NULL!	7003.22	7427.65	7011.06	#NULL!	#NULL!	7493.96	#NULL!	512	517	1	2	8	2	8	8	2	8	1	8	1	1	2	8	8	8	8	1	1	1	1	0	0	2
A933970201	A933970	2010	1	1	1	A933	1	68	#NULL!	4	4	2	7	9387.4	3824.76	5099.16	14321.7	4169.53	3631.52	22362.3	5705.59	15623.9	25974.9	512	517	1	2	8	2	8	8	2	8	1	8	2	8	2	8	8	8	8	1	1	1	1	0	0	2
A933970202	A933970	2010	1	1	1	A933	2	61	#NULL!	4	4	2	7	9387.4	4464.82	4802.13	#NULL!	4463.7	4044.59	#NULL!	5026.22	#NULL!	#NULL!	512	517	1	2	8	2	8	8	2	8	1	8	2	8	2	8	8	8	8	1	1	1	1	0	0	2
A933970701	A933970	2010	1	1	1	A933	1	31	#NULL!	4	4	4	1	9387.4	14648.4	#NULL!	#NULL!	#NULL!	#NULL!	#NULL!	#NULL!	#NULL!	#NULL!	512	517	1	2	8	8	8	8	2	8	1	8	2	8	2	8	8	8	8	1	1	1	1	0	0	1
A933970702	A933970	2010	1	1	1	A933	1	58	#NULL!	4	4	3	5	9387.4	8262.26	#NULL!	#NULL!	12379.4	11685.1	#NULL!	#NULL!	#NULL!	#NULL!	512	517	1	2	8	2	8	8	2	8	1	8	2	8	2	8	8	8	8	1	1	1	1	0	0	2
A933970703	A933970	2010	1	1	1	A933	2	55	#NULL!	4	4	1	3	9387.4	7397.84	7319.93	36785.5	9439.49	7311.02	33390.7	7632.97	38921.8	35977.2	512	517	1	1	2	1	1	2	2	8	2	3	1	2	1	1	2	1	1	1	1	1	1	0	0	2
A933970705	A933970	2010	1	1	1	A933	2	83	#NULL!	4	4	1	6	9387.4	5954.43	29099.5	#NULL!	7989.56	8774.11	#NULL!	30733.9	#NULL!	#NULL!	512	517	1	2	8	2	8	8	2	8	1	8	2	8	2	8	8	8	8	1	1	1	1	0	0	2
A933971001	A933971	2010	1	1	1	A933	1	61	#NULL!	3	3	2	1	9387.4	6355.71	12511.8	#NULL!	7528.62	7968.88	#NULL!	13624.4	#NULL!	#NULL!	512	517	1	2	8	2	8	8	2	8	1	8	1	2	2	8	8	8	8	1	1	1	1	0	0	2
A933971002	A933971	2010	1	1	1	A933	2	54	#NULL!	3	3	1	7	9387.4	7813.3	#NULL!	#NULL!	10287	9464.53	#NULL!	#NULL!	#NULL!	#NULL!	512	517	1	1	2	1	2	2	2	8	2	3	1	2	1	2	1	1	2	1	1	1	1	0	0	2
A933971004	A933971	2010	1	1	1	A933	2	24	#NULL!	3	3	4	7	9387.4	10524.5	#NULL!	33757.9	16496	18759.7	#NULL!	#NULL!	51022.7	#NULL!	512	517	1	1	2	8	8	8	2	8	1	8	1	2	1	2	2	2	2	1	1	1	1	0	0	2
A933971401	A933971	2010	1	1	1	A933	1	40	#NULL!	3	3	3	5	9387.4	9265.67	9818.22	#NULL!	9753.58	12735.6	#NULL!	12409.9	#NULL!	#NULL!	512	517	1	2	8	2	8	8	2	8	3	3	2	8	1	1	2	2	1	1	1	1	1	0	0	2
A933971402	A933971	2010	1	1	1	A933	2	39	#NULL!	3	3	3	2	9387.4	6704.13	#NULL!	#NULL!	6890.28	6807.34	#NULL!	#NULL!	#NULL!	#NULL!	512	517	1	2	8	8	8	8	2	8	1	8	2	8	2	8	8	8	8	1	1	1	1	0	0	2
A933971403	A933971	2010	1	1	1	A933	1	13	#NULL!	3	3	1	#NULL!	9387.4	7314.62	#NULL!	27123.3	6607.86	6200.29	#NULL!	#NULL!	29066.6	#NULL!	512	517	1	1	2	8	8	8	8	8	1	8	2	8	1	1	1	1	2	1	1	1	1	0	#NULL!	2
A933971404	A933971	2010	1	1	1	A933	1	11	#NULL!	3	3	1	#NULL!	9387.4	7314.62	#NULL!	#NULL!	6607.86	6200.29	#NULL!	#NULL!	#NULL!	#NULL!	512	517	1	2	8	8	8	8	8	8	8	8	8	8	2	8	8	8	8	1	1	1	1	0	#NULL!	8
A933973901	A933973	2010	1	1	1	A933	1	72	#NULL!	3	1	4	6	9387.4	3416.89	#NULL!	#NULL!	3702.71	3435.46	#NULL!	#NULL!	#NULL!	#NULL!	512	517	1	1	2	2	8	8	2	8	1	8	1	1	1	2	2	2	2	1	1	1	1	0	0	2
A933973902	A933973	2010	1	1	1	A933	2	70	#NULL!	3	1	3	7	9387.4	4303.04	#NULL!	#NULL!	3706.93	3704.49	#NULL!	#NULL!	#NULL!	#NULL!	512	517	1	2	8	2	8	8	1	2	1	8	2	8	2	8	8	8	8	1	1	1	1	0	1	2
A933974501	A933974	2010	1	1	1	A933	1	54	#NULL!	2	3	2	5	9387.4	11602.8	#NULL!	#NULL!	13348.8	11839.9	#NULL!	#NULL!	#NULL!	#NULL!	512	517	1	2	8	2	8	8	2	8	1	8	2	8	2	8	8	8	8	1	1	1	1	0	0	2
A933975501	A933975	2010	1	1	1	A933	2	75	#NULL!	3	1	1	7	9387.4	9527.09	#NULL!	#NULL!	9587.47	10528.9	#NULL!	#NULL!	#NULL!	#NULL!	512	517	1	2	8	2	8	8	2	8	2	3	1	2	2	8	8	8	8	1	1	1	2	1	0	2
A933976801	A933976	2010	1	1	1	A933	1	73	#NULL!	1	1	1	7	9387.4	3416.89	#NULL!	#NULL!	3702.71	3435.46	#NULL!	#NULL!	#NULL!	#NULL!	512	517	1	2	8	2	8	8	2	8	1	8	2	8	2	8	8	8	8	1	1	1	1	0	0	2
A933976802	A933976	2010	1	1	1	A933	2	69	#NULL!	1	1	1	6	9387.4	3267.38	9379.98	12870.1	3362.26	3597.38	20579.2	9718.89	12752	21047.2	512	517	1	2	8	1	2	2	2	8	1	8	1	1	2	8	8	8	8	1	1	1	1	0	0	2
A933977201	A933977	2010	1	1	1	A933	1	41	#NULL!	3	3	4	1	9387.4	9265.67	#NULL!	#NULL!	9753.58	12735.6	#NULL!	#NULL!	#NULL!	#NULL!	512	517	1	2	8	2	8	8	2	8	1	8	2	8	2	8	8	8	8	1	1	1	1	0	0	2
A933977202	A933977	2010	1	1	1	A933	2	36	#NULL!	3	3	4	7	9387.4	6704.13	#NULL!	23147.8	6890.28	6807.34	#NULL!	#NULL!	21133.5	#NULL!	512	517	1	1	1	8	8	8	2	8	1	8	1	2	1	2	2	2	1	1	1	1	1	0	0	2
A933977203	A933977	2010	1	1	1	A933	1	8	#NULL!	3	3	1	#NULL!	9387.4	4909.37	#NULL!	#NULL!	5080.91	5006.95	#NULL!	#NULL!	#NULL!	#NULL!	512	517	1	2	8	8	8	8	8	8	8	8	8	8	2	8	8	8	8	1	1	1	1	0	#NULL!	8
A933977204	A933977	2010	1	1	1	A933	1	1	21	3	3	1	#NULL!	9387.4	6109.73	#NULL!	#NULL!	6256.75	5245.92	#NULL!	#NULL!	#NULL!	#NULL!	512	517	1	8	8	8	8	8	8	8	8	8	8	8	8	8	8	8	8	8	8	8	8	#NULL!	#NULL!	8
A933979201	A933979	2010	1	1	1	A933	1	37	#NULL!	2	3	4	1	9387.4	15893.3	#NULL!	#NULL!	#NULL!	#NULL!	#NULL!	#NULL!	#NULL!	#NULL!	512	517	1	2	8	8	8	8	2	8	1	8	2	8	2	8	8	8	8	1	1	1	1	0	0	2
A933979203	A933979	2010	1	1	1	A933	1	10	#NULL!	2	3	1	#NULL!	9387.4	7314.62	#NULL!	#NULL!	6607.86	12400.6	#NULL!	#NULL!	#NULL!	#NULL!	512	517	1	1	2	8	8	8	8	8	8	8	8	8	2	8	8	8	8	1	1	1	1	0	#NULL!	8
A933979204	A933979	2010	1	1	1	A933	1	4	53	3	3	1	#NULL!	9387.4	6109.73	#NULL!	#NULL!	6256.75	10491.8	#NULL!	#NULL!	#NULL!	#NULL!	512	517	1	2	8	8	8	8	8	8	8	8	8	8	8	8	8	8	8	8	8	8	8	#NULL!	#NULL!	8
A934968102	A934968	2010	1	1	2	A934	2	32	#NULL!	3	3	4	7	2877.01	6799.75	#NULL!	#NULL!	3069.59	6531.52	#NULL!	#NULL!	#NULL!	#NULL!	501	501	1	2	8	8	8	8	2	8	1	8	1	2	2	8	8	8	8	1	1	1	1	0	0	2
A934968502	A934968	2010	1	1	2	A934	2	35	#NULL!	3	4	4	7	2877.01	2773.78	#NULL!	9577.21	5701.6	3755.31	#NULL!	#NULL!	13115.7	#NULL!	501	501	1	1	9	8	8	8	2	8	1	8	1	1	1	2	2	1	1	1	1	1	1	0	0	2
A934968503	A934968	2010	1	1	2	A934	1	10	#NULL!	3	4	1	#NULL!	2877.01	3026.37	#NULL!	#NULL!	2733.95	3420.43	#NULL!	#NULL!	#NULL!	#NULL!	501	501	1	1	2	8	8	8	8	8	8	8	8	8	1	2	1	1	2	1	1	1	1	0	#NULL!	8
A934968504	A934968	2010	1	1	2	A934	1	6	74	3	4	1	#NULL!	2877.01	2031.21	#NULL!	#NULL!	2102.19	2762.11	#NULL!	#NULL!	#NULL!	#NULL!	501	501	1	2	8	8	8	8	8	8	8	8	8	8	1	2	2	2	1	1	1	1	1	0	#NULL!	8
A934968602	A934968	2010	1	1	2	A934	2	32	#NULL!	2	2	3	7	2877.01	3399.88	#NULL!	#NULL!	6139.18	4898.64	#NULL!	#NULL!	#NULL!	#NULL!	501	501	1	2	8	8	8	8	2	8	1	8	2	8	1	1	2	1	1	1	1	1	1	0	0	2
A934968603	A934968	2010	1	1	2	A934	1	7	#NULL!	2	2	1	#NULL!	2877.01	2031.21	#NULL!	#NULL!	2102.19	3107.38	#NULL!	#NULL!	#NULL!	#NULL!	501	501	1	2	8	8	8	8	8	8	8	8	8	8	2	8	8	8	8	1	1	1	1	0	#NULL!	8
A934969501	A934969	2010	1	1	2	A934	1	63	#NULL!	1	1	2	3	2877.01	1972.22	2588.33	#NULL!	1868.94	1978.24	#NULL!	2818.49	#NULL!	#NULL!	501	501	1	2	8	2	8	8	2	8	1	8	1	2	2	8	8	8	8	1	1	1	1	0	0	2
A934969502	A934969	2010	1	1	2	A934	2	59	#NULL!	1	1	3	7	2877.01	2448.64	2019.04	#NULL!	2343.31	1814.93	#NULL!	2105.39	#NULL!	#NULL!	501	501	1	2	8	2	8	8	2	8	1	8	2	8	2	8	8	8	8	1	1	1	1	0	0	2
A934969503	A934969	2010	1	1	2	A934	1	3	37	1	1	1	#NULL!	2877.01	2527.85	#NULL!	#NULL!	2588.68	2170.46	#NULL!	#NULL!	#NULL!	#NULL!	501	501	1	8	8	8	8	8	8	8	8	8	8	8	8	8	8	8	8	8	8	8	8	#NULL!	#NULL!	8
A934969901	A934969	2010	1	1	2	A934	2	70	#NULL!	#NULL!	#NULL!	1	7	2877.01	1780.35	2895.14	#NULL!	#NULL!	#NULL!	#NULL!	#NULL!	#NULL!	#NULL!	501	501	1	2	8	2	8	8	2	8	1	8	2	8	2	8	8	8	8	1	1	1	1	0	0	2
A934970401	A934970	2010	1	1	2	A934	1	67	#NULL!	3	2	2	7	2877.01	1582.46	#NULL!	#NULL!	2587.66	2253.77	#NULL!	#NULL!	#NULL!	#NULL!	501	501	1	2	8	2	8	8	2	8	1	8	2	8	2	8	8	8	8	1	1	1	1	0	0	2
A934970402	A934970	2010	1	1	2	A934	2	62	#NULL!	3	2	2	7	2877.01	1847.28	3973.68	#NULL!	2770.23	2510.12	#NULL!	4159.12	#NULL!	#NULL!	501	501	1	2	8	1	3	2	2	8	1	8	2	8	2	8	8	8	8	1	1	1	1	0	0	2
A934970403	A934970	2010	1	1	2	A934	1	26	#NULL!	2	2	4	3	2877.01	5820.93	#NULL!	#NULL!	#NULL!	#NULL!	#NULL!	#NULL!	#NULL!	#NULL!	501	501	1	2	8	8	8	8	2	8	1	8	2	8	2	8	8	8	8	1	1	1	1	0	0	2
A934971001	A934971	2010	1	1	2	A934	1	67	#NULL!	2	1	#NULL!	#NULL!	2877.01	1582.46	#NULL!	5925.5	1725.11	1502.51	#NULL!	#NULL!	6464.25	#NULL!	501	501	1	2	8	2	8	8	2	8	3	1	1	2	1	2	2	2	1	2	1	1	1	0	0	2
A934971002	A934971	2010	1	1	2	A934	2	64	#NULL!	2	1	1	7	2877.01	1847.28	#NULL!	#NULL!	1846.82	1673.42	#NULL!	#NULL!	#NULL!	#NULL!	501	501	1	2	8	2	8	8	2	8	1	8	1	2	1	2	1	1	2	1	1	1	1	0	0	2
A934971501	A934971	2010	1	1	2	A934	1	51	#NULL!	3	3	1	5	2877.01	4800.55	4663.14	#NULL!	11045.9	9797.34	#NULL!	5825.65	#NULL!	#NULL!	501	501	1	2	8	2	8	8	2	8	1	8	2	8	2	8	8	8	8	1	1	1	1	0	0	2
A934971502	A934971	2010	1	1	2	A934	2	51	#NULL!	3	3	1	7	2877.01	2424.52	2606.28	#NULL!	5107.41	4699.05	#NULL!	2727.51	#NULL!	#NULL!	501	501	1	2	8	2	8	8	2	8	1	8	1	1	2	8	8	8	8	1	1	1	1	0	0	2
A934971503	A934971	2010	1	1	2	A934	1	29	#NULL!	3	3	3	3	2877.01	5820.93	#NULL!	17737.9	#NULL!	#NULL!	#NULL!	#NULL!	#NULL!	#NULL!	501	501	1	2	8	8	8	8	2	8	1	8	2	8	2	8	8	8	8	1	1	1	1	0	0	2
A934971504	A934971	2010	1	1	2	A934	1	28	#NULL!	3	3	3	#NULL!	2877.01	5820.93	#NULL!	#NULL!	#NULL!	#NULL!	#NULL!	#NULL!	#NULL!	#NULL!	501	501	1	2	8	8	8	8	2	8	1	8	2	8	2	8	8	8	8	1	1	1	1	0	0	2
A934972201	A934972	2010	1	1	2	A934	1	76	#NULL!	1	1	2	7	2877.01	3170.96	#NULL!	#NULL!	#NULL!	#NULL!	#NULL!	#NULL!	#NULL!	#NULL!	501	501	1	2	8	2	8	8	2	8	1	8	2	8	1	2	1	1	2	1	1	1	1	0	0	2
A934972901	A934972	2010	1	1	2	A934	1	55	#NULL!	3	3	2	5	2877.01	2734.76	3502.23	#NULL!	3073.13	2900.77	#NULL!	3928.6	#NULL!	#NULL!	501	501	1	2	8	2	8	8	2	8	1	8	2	8	2	8	8	8	8	1	1	1	1	0	0	2
A934972902	A934972	2010	1	1	2	A934	2	52	#NULL!	3	3	2	5	2877.01	2424.52	2606.28	#NULL!	2553.71	2349.53	#NULL!	2727.51	#NULL!	#NULL!	501	501	1	2	8	2	8	8	2	8	1	8	2	8	1	2	1	1	2	1	1	1	1	0	0	2
A934973103	A934973	2010	1	1	2	A934	1	6	79	2	3	1	#NULL!	2877.01	2031.21	#NULL!	#NULL!	2102.19	2762.11	#NULL!	#NULL!	#NULL!	#NULL!	501	501	1	2	8	8	8	8	8	8	8	8	8	8	2	8	8	8	8	1	1	1	1	0	#NULL!	8
A934973104	A934973	2010	1	1	2	A934	1	2	31	2	3	1	#NULL!	2877.01	2527.85	#NULL!	#NULL!	2588.68	2893.94	#NULL!	#NULL!	#NULL!	#NULL!	501	501	1	8	8	8	8	8	8	8	8	8	8	8	8	8	8	8	8	8	8	8	8	#NULL!	#NULL!	8
A934973601	A934973	2010	1	1	2	A934	1	51	#NULL!	2	3	2	5	2877.01	4800.55	4663.14	#NULL!	#NULL!	#NULL!	#NULL!	#NULL!	#NULL!	#NULL!	501	501	1	2	8	2	8	8	2	8	1	8	2	8	2	8	8	8	8	1	1	1	1	0	0	2
A934973602	A934973	2010	1	1	2	A934	2	48	#NULL!	2	3	1	6	2877.01	3677.74	3777.07	9544.84	#NULL!	#NULL!	15012.3	#NULL!	#NULL!	#NULL!	501	501	1	2	8	2	8	8	2	8	1	8	2	8	2	8	8	8	8	1	1	1	1	0	0	2
A934974501	A934974	2010	1	1	2	A934	1	59	#NULL!	1	2	2	6	2877.01	2734.76	3502.23	#NULL!	3073.13	2900.77	#NULL!	3928.6	#NULL!	#NULL!	501	501	1	1	2	2	8	8	2	8	1	8	2	8	1	1	2	2	2	1	1	1	1	0	0	2
A934974502	A934974	2010	1	1	2	A934	2	54	#NULL!	1	2	1	7	2877.01	2424.52	2606.28	10010.5	2553.71	2349.53	14676	2727.51	11252.8	16617.2	501	501	1	2	8	1	3	2	2	8	2	3	2	8	2	8	8	8	8	1	1	1	1	0	0	2
A934975001	A934975	2010	1	1	2	A934	2	45	#NULL!	3	4	4	1	2877.01	3677.74	3777.07	#NULL!	7832.01	5880.78	#NULL!	4019.36	#NULL!	#NULL!	501	501	1	1	2	2	8	8	2	8	1	8	2	8	2	8	8	8	8	1	1	1	1	0	0	2
A934975002	A934975	2010	1	1	2	A934	1	46	#NULL!	3	4	3	2	2877.01	6123.41	4935.56	#NULL!	14707.1	12219.5	#NULL!	6541.33	#NULL!	#NULL!	501	501	1	2	8	2	8	8	2	8	1	8	2	8	2	8	8	8	8	1	1	1	1	0	0	2
A934975004	A934975	2010	1	1	2	A934	1	17	#NULL!	3	4	2	7	2877.01	3472.69	#NULL!	14567.2	#NULL!	#NULL!	#NULL!	#NULL!	#NULL!	#NULL!	501	501	1	2	8	8	8	8	8	8	1	8	2	8	2	8	8	8	8	1	1	1	1	0	#NULL!	2
A934975005	A934975	2010	1	1	2	A934	2	13	#NULL!	4	4	1	#NULL!	2877.01	2689.65	#NULL!	#NULL!	#NULL!	#NULL!	#NULL!	#NULL!	#NULL!	#NULL!	501	501	1	2	8	8	8	8	8	8	1	8	2	8	2	8	8	8	8	1	1	1	1	0	#NULL!	2
A934975502	A934975	2010	1	1	2	A934	2	39	#NULL!	3	3	3	7	2877.01	2773.78	#NULL!	#NULL!	2850.8	2816.48	#NULL!	#NULL!	#NULL!	#NULL!	501	501	1	2	8	8	8	8	2	8	1	8	1	1	2	8	8	8	8	1	1	1	1	0	0	2
A934975503	A934975	2010	1	1	2	A934	1	11	#NULL!	3	3	1	#NULL!	2877.01	3026.37	#NULL!	#NULL!	2733.95	2565.32	#NULL!	#NULL!	#NULL!	#NULL!	501	501	1	2	8	8	8	8	8	8	8	8	8	8	1	1	1	1	2	1	1	1	1	0	#NULL!	8
A934975504	A934975	2010	1	1	2	A934	1	9	#NULL!	3	3	1	#NULL!	2877.01	2031.21	#NULL!	#NULL!	2102.19	2071.58	#NULL!	#NULL!	#NULL!	#NULL!	501	501	1	2	8	8	8	8	8	8	8	8	8	8	1	2	2	2	2	1	2	1	1	0	#NULL!	8
A934976601	A934976	2010	1	1	2	A934	1	54	#NULL!	3	4	3	5	2877.01	4800.55	4663.14	10801.1	5522.95	4898.67	15468.6	5825.65	13458.3	20369.4	501	501	1	2	8	2	8	8	2	8	1	8	2	8	1	2	1	1	2	1	1	1	1	0	0	2
A934976602	A934976	2010	1	1	2	A934	2	51	#NULL!	3	4	2	3	2877.01	2424.52	2606.28	#NULL!	2553.71	2349.53	#NULL!	2727.51	#NULL!	#NULL!	501	501	1	2	8	2	8	8	2	8	1	8	1	1	2	8	8	8	8	1	1	1	1	0	0	2
A934977402	A934977	2010	1	1	2	A934	2	38	#NULL!	2	3	3	7	2877.01	5547.56	#NULL!	#NULL!	5701.6	3755.31	#NULL!	#NULL!	#NULL!	#NULL!	501	501	1	2	8	8	8	8	2	8	1	8	2	8	1	2	2	2	1	1	1	1	2	1	0	2
A934977403	A934977	2010	1	1	2	A934	2	6	74	2	3	1	#NULL!	2877.01	1835.15	#NULL!	#NULL!	1861.65	2792.12	#NULL!	#NULL!	#NULL!	#NULL!	501	501	1	2	8	8	8	8	8	8	8	8	8	8	1	1	1	1	2	1	1	1	1	0	#NULL!	8
A934977404	A934977	2010	1	1	2	A934	2	4	51	2	3	1	#NULL!	2877.01	2323.8	#NULL!	#NULL!	2389.83	2562.4	#NULL!	#NULL!	#NULL!	#NULL!	501	501	1	2	8	8	8	8	8	8	8	8	8	8	8	8	8	8	8	8	8	8	8	#NULL!	#NULL!	8
A934978101	A934978	2010	1	1	2	A934	2	61	#NULL!	3	3	4	1	2877.01	1847.28	1986.84	4361.37	1846.82	1673.42	7667.61	2079.56	4210.34	7737.55	501	501	1	2	8	1	3	2	1	2	1	8	2	8	1	2	1	1	2	1	1	1	1	0	1	2
A935969601	A935969	2010	1	1	1	A935	1	75	#NULL!	4	3	2	6	7093.89	3657.86	11499.7	#NULL!	6482.81	6103.37	#NULL!	18236.2	#NULL!	#NULL!	512	517	1	2	8	2	8	8	2	8	1	8	1	1	2	8	8	8	8	1	1	1	1	0	0	2
A935969602	A935969	2010	1	1	1	A935	2	71	#NULL!	4	3	1	7	7093.89	4107.45	6679.39	#NULL!	5307.65	5304.15	#NULL!	10789.4	#NULL!	#NULL!	512	517	1	2	8	2	8	8	2	8	2	3	2	8	1	1	1	1	2	1	1	1	1	0	0	2
A935969603	A935969	2010	1	1	1	A935	1	44	#NULL!	2	3	3	5	7093.89	8844.51	9371.93	38443	#NULL!	#NULL!	57298.4	#NULL!	#NULL!	#NULL!	512	517	1	2	8	2	8	8	2	8	1	8	2	8	2	8	8	8	8	1	1	1	1	0	0	2
A935970102	A935970	2010	1	1	1	A935	2	64	#NULL!	4	4	1	3	7093.89	12785.6	9167.7	#NULL!	#NULL!	#NULL!	#NULL!	#NULL!	#NULL!	#NULL!	512	517	1	2	8	2	8	8	2	8	1	8	2	8	2	8	8	8	8	1	1	1	1	0	0	2
A935970501	A935970	2010	1	1	1	A935	2	52	#NULL!	1	2	2	3	7093.89	11187.2	#NULL!	23095.4	11783.3	10841.2	#NULL!	#NULL!	25961.5	#NULL!	512	517	1	2	8	2	8	8	2	8	1	8	2	8	2	8	8	8	8	1	1	1	1	0	0	2
A935971301	A935971	2010	1	1	1	A935	1	51	#NULL!	1	2	2	7	7093.89	11075.4	10758.3	#NULL!	#NULL!	#NULL!	#NULL!	#NULL!	#NULL!	#NULL!	512	517	1	2	8	2	8	8	2	8	1	8	1	1	2	8	8	8	8	1	1	1	1	0	0	2
A935971302	A935971	2010	1	1	1	A935	2	47	#NULL!	1	2	3	1	7093.89	8484.92	8714.09	#NULL!	#NULL!	#NULL!	#NULL!	#NULL!	#NULL!	#NULL!	512	517	1	2	8	2	8	8	2	8	1	8	2	8	2	8	8	8	8	1	1	1	1	0	0	2
A935971303	A935971	2010	1	1	1	A935	2	21	#NULL!	1	2	3	7	7093.89	7534.62	#NULL!	#NULL!	#NULL!	#NULL!	#NULL!	#NULL!	#NULL!	#NULL!	512	517	1	2	8	8	8	8	2	8	1	8	1	1	2	8	8	8	8	1	1	1	1	0	0	1
A935971304	A935971	2010	1	1	1	A935	1	19	#NULL!	1	2	3	7	7093.89	8011.85	#NULL!	56102.8	#NULL!	#NULL!	#NULL!	#NULL!	#NULL!	#NULL!	512	517	1	2	8	8	8	8	2	8	1	8	2	8	2	8	8	8	8	1	1	1	1	0	0	2
A935971401	A935971	2010	1	1	1	A935	1	55	#NULL!	3	3	1	5	7093.89	9464.05	16160	20054.7	10635	10038.6	20750.8	18127.3	21460	23846.2	512	517	1	2	8	2	8	8	2	8	2	3	2	8	2	8	8	8	8	1	1	1	1	0	0	2
A935971402	A935971	2010	1	1	1	A935	2	48	#NULL!	3	3	1	5	7093.89	12727.4	#NULL!	#NULL!	13551.9	10175.7	#NULL!	#NULL!	#NULL!	#NULL!	512	517	1	1	2	2	8	8	2	8	1	8	2	8	2	8	8	8	8	1	1	1	1	0	0	2
A935971801	A935971	2010	1	1	1	A935	1	32	#NULL!	3	3	4	1	7093.89	11186	#NULL!	#NULL!	18156.7	15951.4	#NULL!	#NULL!	#NULL!	#NULL!	512	517	1	2	8	8	8	8	2	8	1	8	2	8	2	8	8	8	8	1	1	1	1	0	0	2
A935971802	A935971	2010	1	1	1	A935	2	32	#NULL!	3	3	4	1	7093.89	7843.87	#NULL!	41643.5	7081.86	7534.44	#NULL!	#NULL!	41414	#NULL!	512	517	1	2	8	8	8	8	2	8	1	8	2	8	2	8	8	8	8	1	1	1	1	0	0	2
A935971803	A935971	2010	1	1	1	A935	1	6	72	3	3	1	#NULL!	7093.89	4686.21	#NULL!	#NULL!	4849.96	4779.36	#NULL!	#NULL!	#NULL!	#NULL!	512	517	1	2	8	8	8	8	8	8	8	8	8	8	2	8	8	8	8	1	1	1	1	0	#NULL!	8
A935971804	A935971	2010	1	1	1	A935	1	1	13	3	3	1	#NULL!	7093.89	5832.01	#NULL!	#NULL!	5972.35	5007.47	#NULL!	#NULL!	#NULL!	#NULL!	512	517	1	8	8	8	8	8	8	8	8	8	8	8	8	8	8	8	8	8	8	8	8	#NULL!	#NULL!	8
A935971805	A935971	2010	1	1	1	A935	2	50	#NULL!	2	3	1	7	7093.89	5593.61	6012.95	#NULL!	5891.66	5420.6	#NULL!	6292.64	#NULL!	#NULL!	512	517	1	2	8	2	8	8	2	8	1	8	2	8	2	8	8	8	8	1	1	1	1	0	0	2
A935972102	A935972	2010	1	1	1	A935	2	52	#NULL!	1	2	1	7	7093.89	11187.2	12025.9	#NULL!	5891.66	10841.2	#NULL!	12585.3	#NULL!	#NULL!	512	517	1	1	2	2	8	8	2	8	1	8	2	8	1	2	1	1	2	1	1	1	1	0	0	2
A935972201	A935972	2010	1	1	1	A935	1	56	#NULL!	2	3	3	2	7093.89	6309.37	8080	#NULL!	7090.03	6692.37	#NULL!	9063.67	#NULL!	#NULL!	512	517	1	2	8	2	8	8	2	8	1	8	2	8	1	1	1	1	2	1	1	1	1	0	0	2
A935972202	A935972	2010	1	1	1	A935	2	46	#NULL!	2	3	2	7	7093.89	8484.92	8714.09	#NULL!	9034.63	6783.79	#NULL!	9273.09	#NULL!	#NULL!	512	517	1	2	8	2	8	8	2	8	2	3	1	2	2	8	8	8	8	1	1	1	1	0	0	2
A935972203	A935972	2010	1	1	1	A935	1	22	#NULL!	2	3	3	7	7093.89	11960.8	#NULL!	34127.2	19634.5	27267.9	#NULL!	#NULL!	49653.4	#NULL!	512	517	1	2	8	8	8	8	2	8	1	8	2	8	2	8	8	8	8	1	1	1	1	0	0	2
A935972501	A935972	2010	1	1	1	A935	1	59	#NULL!	1	2	1	7	7093.89	6309.37	16160	#NULL!	#NULL!	#NULL!	#NULL!	#NULL!	#NULL!	#NULL!	512	517	1	2	8	2	8	8	2	8	1	8	2	8	2	8	8	8	8	1	1	1	2	1	0	2
A935972502	A935972	2010	1	1	1	A935	2	52	#NULL!	1	2	2	7	7093.89	5593.61	#NULL!	34643	8837.49	8130.9	#NULL!	#NULL!	38942.2	#NULL!	512	517	1	2	8	2	8	8	2	8	1	8	1	1	2	8	8	8	8	1	1	1	1	0	0	2
A935972503	A935972	2010	1	1	1	A935	2	28	#NULL!	1	2	3	1	7093.89	12136.4	#NULL!	#NULL!	17039.4	14112.4	#NULL!	#NULL!	#NULL!	#NULL!	512	517	1	1	1	8	8	8	2	8	1	8	1	1	1	2	1	2	1	2	2	1	1	0	0	2
A935973401	A935973	2010	1	1	1	A935	1	81	#NULL!	1	1	1	7	7093.89	7315.72	#NULL!	#NULL!	#NULL!	#NULL!	#NULL!	#NULL!	#NULL!	#NULL!	512	517	1	2	8	2	8	8	2	8	1	8	2	8	1	1	2	1	2	1	1	1	1	0	0	2
A935973402	A935973	2010	1	1	1	A935	2	79	#NULL!	1	1	1	6	7093.89	9094.04	#NULL!	#NULL!	#NULL!	#NULL!	#NULL!	#NULL!	#NULL!	#NULL!	512	517	1	2	8	2	8	8	2	8	2	3	2	8	2	8	8	8	8	1	1	1	1	0	0	2
A935973405	A935973	2010	1	1	1	A935	2	8	#NULL!	1	1	1	#NULL!	7093.89	4233.87	#NULL!	#NULL!	#NULL!	#NULL!	#NULL!	#NULL!	#NULL!	#NULL!	512	517	1	2	8	8	8	8	8	8	8	8	8	8	2	8	8	8	8	1	1	1	1	0	#NULL!	8
A935973501	A935973	2010	1	1	1	A935	1	62	#NULL!	1	1	3	3	7093.89	4550.11	5971.55	13327.1	4311.84	4563.99	24869.9	6502.54	14774.2	25562.4	512	517	1	1	2	2	8	8	2	8	1	8	2	8	2	8	8	8	8	1	2	1	1	0	0	2
A935973502	A935973	2010	1	1	1	A935	2	63	#NULL!	1	1	1	7	7093.89	4261.87	4583.85	#NULL!	4260.8	3860.74	#NULL!	4797.76	#NULL!	#NULL!	512	517	1	2	8	1	2	2	2	8	3	3	2	8	2	8	8	8	8	1	1	1	1	0	0	2
A935973801	A935973	2010	1	1	1	A935	1	63	#NULL!	1	1	1	6	7093.89	9100.22	11943.1	#NULL!	8623.69	9127.99	#NULL!	13005.1	#NULL!	#NULL!	512	517	1	2	8	2	8	8	1	2	1	8	2	8	2	8	8	8	8	1	1	1	1	0	1	2
A935976801	A935976	2010	1	1	1	A935	1	73	#NULL!	3	1	2	7	7093.89	3261.58	#NULL!	#NULL!	3534.41	3279.3	#NULL!	#NULL!	#NULL!	#NULL!	512	517	1	2	8	2	8	8	2	8	3	1	1	3	1	1	1	1	2	1	1	1	1	0	0	2
A935976802	A935976	2010	1	1	1	A935	2	72	#NULL!	3	1	1	7	7093.89	4107.45	#NULL!	88238.1	3538.44	3536.1	#NULL!	#NULL!	98288.8	#NULL!	512	517	1	2	8	2	8	8	2	8	1	8	2	8	2	8	8	8	8	1	1	1	1	0	0	2
A935978201	A935978	2010	1	1	1	A935	1	52	#NULL!	2	3	3	3	7093.89	11075.4	#NULL!	#NULL!	12742	11301.7	#NULL!	#NULL!	#NULL!	#NULL!	512	517	1	2	8	2	8	8	2	8	1	8	2	8	1	1	2	2	1	1	1	1	1	0	0	2
A935978202	A935978	2010	1	1	1	A935	2	52	#NULL!	3	3	4	7	7093.89	5593.61	12025.9	#NULL!	5891.66	5420.6	#NULL!	12585.3	#NULL!	#NULL!	512	517	1	2	8	2	8	8	2	8	2	3	1	1	1	1	1	1	2	1	1	1	1	0	0	2
A935978203	A935978	2010	1	1	1	A935	2	26	#NULL!	3	3	4	1	7093.89	12136.4	#NULL!	23433	11359.6	9408.28	#NULL!	#NULL!	26209.4	#NULL!	512	517	1	2	8	8	8	8	2	8	1	8	1	1	2	8	8	8	8	1	1	1	1	0	0	2
A935979501	A935979	2010	1	1	1	A935	1	41	#NULL!	1	2	3	3	7093.89	8844.51	9371.93	#NULL!	9310.24	12156.7	#NULL!	11845.8	#NULL!	#NULL!	512	517	1	2	8	2	8	8	2	8	1	8	2	8	2	8	8	8	8	1	1	1	1	0	0	2
A935979502	A935979	2010	1	1	1	A935	2	40	#NULL!	1	2	3	7	7093.89	8218.95	10460.7	#NULL!	8195.43	7656.29	#NULL!	9729.04	#NULL!	#NULL!	512	517	1	2	8	2	8	8	2	8	1	8	2	8	2	8	8	8	8	1	1	1	1	0	0	2
A935979503	A935979	2010	1	1	1	A935	2	14	#NULL!	1	2	1	#NULL!	7093.89	6205.29	#NULL!	10934.2	6103.24	6018.41	#NULL!	#NULL!	18533.7	#NULL!	512	517	1	2	8	8	8	8	8	8	1	8	2	8	2	8	8	8	8	1	1	1	1	0	#NULL!	2
A935979504	A935979	2010	1	1	1	A935	1	9	#NULL!	1	2	1	#NULL!	7093.89	4686.21	#NULL!	#NULL!	4849.96	4779.36	#NULL!	#NULL!	#NULL!	#NULL!	512	517	1	2	8	8	8	8	8	8	8	8	8	8	1	1	1	1	2	1	1	1	1	0	#NULL!	8
A935979701	A935979	2010	1	1	1	A935	1	44	#NULL!	2	3	4	2	7093.89	8844.51	9371.93	#NULL!	9310.24	12156.7	#NULL!	11845.8	#NULL!	#NULL!	512	517	1	2	8	2	8	8	2	8	2	3	2	8	1	1	2	1	2	1	1	1	1	0	0	2
A935979702	A935979	2010	1	1	1	A935	2	42	#NULL!	3	3	3	3	7093.89	8218.95	10460.7	34602.8	8195.43	7656.29	46740.3	9729.04	55742.9	48391.6	512	517	1	2	8	2	8	8	2	8	1	8	2	8	2	8	8	8	8	1	1	1	1	0	0	2
A935979703	A935979	2010	1	1	1	A935	1	14	#NULL!	2	3	1	#NULL!	7093.89	6982.14	#NULL!	#NULL!	6307.5	5918.46	#NULL!	#NULL!	#NULL!	#NULL!	512	517	1	1	2	8	8	8	8	8	1	8	2	8	1	2	2	1	1	1	1	1	1	0	#NULL!	2
A935979704	A935979	2010	1	1	1	A935	2	10	#NULL!	3	3	1	#NULL!	7093.89	6205.29	#NULL!	#NULL!	6103.24	6018.41	#NULL!	#NULL!	#NULL!	#NULL!	512	517	1	2	8	8	8	8	8	8	8	8	8	8	2	8	8	8	8	1	1	1	1	0	#NULL!	8
A936968001	A936968	2010	1	1	1	A936	2	59	#NULL!	1	2	1	7	14306.4	6456.3	5323.59	8025.93	6178.58	4785.4	12142.1	5551.25	8492.03	13082.6	512	517	1	2	8	2	8	8	2	8	1	8	2	8	2	8	8	8	8	1	1	1	1	0	0	2
A936970102	A936970	2010	1	1	1	A936	2	46	#NULL!	3	3	3	3	14306.4	9697.05	14938.4	#NULL!	10325.3	9691.12	#NULL!	15896.7	#NULL!	#NULL!	512	517	1	2	8	2	8	8	2	8	1	8	2	8	2	8	8	8	8	1	1	1	1	0	0	2
A936970105	A936970	2010	1	1	1	A936	2	77	#NULL!	4	3	1	7	14306.4	5196.59	29099.5	#NULL!	5229.53	7178.82	#NULL!	30733.9	#NULL!	#NULL!	512	517	1	2	8	2	8	8	2	8	2	3	1	2	2	8	8	8	8	1	1	1	1	0	0	2
A936970403	A936970	2010	1	1	1	A936	1	24	#NULL!	4	4	3	3	14306.4	13669.5	#NULL!	#NULL!	#NULL!	#NULL!	#NULL!	#NULL!	#NULL!	#NULL!	512	517	1	2	8	8	8	8	2	8	1	8	2	8	2	8	8	8	8	1	1	1	1	0	0	1
A936971401	A936971	2010	1	1	1	A936	1	32	#NULL!	1	2	4	5	14306.4	12784	#NULL!	55608.9	18156.7	18230.2	#NULL!	#NULL!	68003.4	#NULL!	512	517	1	2	8	8	8	8	2	8	1	8	2	8	1	1	1	1	2	1	1	1	1	0	0	2
A936971402	A936971	2010	1	1	1	A936	2	31	#NULL!	1	2	4	2	14306.4	8964.42	#NULL!	#NULL!	8093.56	8610.79	#NULL!	#NULL!	#NULL!	#NULL!	512	517	1	2	8	8	8	8	2	8	1	8	2	8	2	8	8	8	8	1	1	1	1	0	0	2
A936971403	A936971	2010	1	1	1	A936	1	1	22	1	2	1	#NULL!	14306.4	6665.16	#NULL!	#NULL!	6825.55	5722.82	#NULL!	#NULL!	#NULL!	#NULL!	512	517	1	8	8	8	8	8	8	8	8	8	8	8	8	8	8	8	8	8	8	8	8	#NULL!	#NULL!	8
A936971405	A936971	2010	1	1	1	A936	1	71	#NULL!	3	2	2	7	14306.4	3727.52	5998.12	#NULL!	4039.32	3747.77	#NULL!	5966.54	#NULL!	#NULL!	512	517	1	2	8	2	8	8	2	8	1	8	2	8	2	8	8	8	8	1	1	1	1	0	0	2
A936971406	A936971	2010	1	1	1	A936	2	61	#NULL!	2	2	1	7	14306.4	4870.71	5238.68	#NULL!	4869.49	4412.28	#NULL!	5483.15	#NULL!	#NULL!	512	517	1	2	8	1	2	1	2	8	1	8	2	8	1	2	2	2	2	1	1	1	1	0	0	2
A936971801	A936971	2010	1	1	1	A936	1	38	#NULL!	#NULL!	#NULL!	4	#NULL!	14306.4	10505.6	#NULL!	#NULL!	12775.1	14149.9	#NULL!	#NULL!	#NULL!	#NULL!	512	517	1	2	8	8	8	8	2	8	1	8	2	8	2	8	8	8	8	1	1	1	1	0	0	2
A936971803	A936971	2010	1	1	1	A936	2	14	#NULL!	#NULL!	#NULL!	1	#NULL!	14306.4	7091.76	#NULL!	#NULL!	6975.14	6878.18	#NULL!	#NULL!	#NULL!	#NULL!	512	517	1	2	8	8	8	8	8	8	1	8	2	8	2	8	8	8	8	1	1	1	1	0	#NULL!	2
A936971805	A936971	2010	1	1	1	A936	1	73	#NULL!	#NULL!	#NULL!	3	7	14306.4	3727.52	5998.12	#NULL!	4039.32	3747.77	#NULL!	5966.54	#NULL!	#NULL!	512	517	1	2	8	2	8	8	2	8	1	8	2	8	2	8	8	8	8	1	1	1	1	0	0	2
A936971806	A936971	2010	1	1	1	A936	2	68	#NULL!	#NULL!	#NULL!	2	7	14306.4	3564.41	5116.35	#NULL!	3667.92	3924.42	#NULL!	5301.21	#NULL!	#NULL!	512	517	1	2	8	2	8	8	2	8	1	8	2	8	2	8	8	8	8	1	1	1	1	0	0	2
A936974501	A936974	2010	1	1	1	A936	1	68	#NULL!	4	3	1	7	14306.4	4172.46	5562.72	11717.8	4548.58	3961.66	24395.2	6224.28	12783.2	28336.2	512	517	1	2	8	2	8	8	2	8	1	8	2	8	2	8	8	8	8	1	1	1	1	0	0	2
A936974502	A936974	2010	1	1	1	A936	2	62	#NULL!	3	3	1	7	14306.4	4870.71	5238.68	#NULL!	4869.49	4412.28	#NULL!	5483.15	#NULL!	#NULL!	512	517	1	1	2	2	8	8	2	8	1	8	2	8	1	2	2	2	1	1	1	1	1	0	0	2
A936974503	A936974	2010	1	1	1	A936	2	34	#NULL!	2	3	3	3	14306.4	8964.42	#NULL!	23796.3	8093.56	8610.79	#NULL!	#NULL!	23665.1	#NULL!	512	517	1	2	8	8	8	8	2	8	1	8	2	8	2	8	8	8	8	1	1	1	1	0	0	2
A936974701	A936974	2010	1	1	1	A936	1	68	#NULL!	3	2	2	6	14306.4	4172.46	5562.72	#NULL!	4548.58	3961.66	#NULL!	6224.28	#NULL!	#NULL!	512	517	1	2	8	2	8	8	2	8	1	8	2	8	1	2	1	1	1	1	1	1	1	0	0	2
A936974702	A936974	2010	1	1	1	A936	2	62	#NULL!	2	2	1	7	14306.4	4870.71	5238.68	22999.2	4869.49	4412.28	40434.2	5483.15	22202.7	40803	512	517	1	2	8	2	8	8	2	8	1	8	2	8	2	8	8	8	8	1	1	1	1	0	0	2
A937968801	A937968	2010	1	1	1	A937	2	68	#NULL!	1	1	1	7	7396.13	3217.87	4618.93	6337.57	3311.31	3542.88	10133.7	4785.82	6279.41	10364.1	512	517	1	2	8	2	8	8	2	8	1	8	2	8	2	8	8	8	8	1	1	1	1	0	0	2
A937968901	A937968	2010	1	1	1	A937	1	41	#NULL!	2	2	4	1	7396.13	9125.29	9669.46	#NULL!	9605.8	12542.6	#NULL!	12221.9	#NULL!	#NULL!	512	517	1	2	8	2	8	8	2	8	1	8	2	8	2	8	8	8	8	1	1	1	1	0	0	2
A937968902	A937968	2010	1	1	1	A937	2	38	#NULL!	2	2	4	7	7396.13	6602.55	#NULL!	22797.1	6785.88	6704.2	#NULL!	#NULL!	31219.9	#NULL!	512	517	1	2	8	8	8	8	2	8	1	8	2	8	2	8	8	8	8	1	1	1	1	0	0	2
A937968903	A937968	2010	1	1	1	A937	2	11	#NULL!	2	2	1	#NULL!	7396.13	6402.28	#NULL!	#NULL!	6297	6209.47	#NULL!	#NULL!	#NULL!	#NULL!	512	517	1	2	8	8	8	8	8	8	8	8	8	8	2	8	8	8	8	1	1	1	1	0	#NULL!	8
A937968904	A937968	2010	1	1	1	A937	1	7	#NULL!	2	2	1	#NULL!	7396.13	4834.98	#NULL!	#NULL!	5003.92	4931.08	#NULL!	#NULL!	#NULL!	#NULL!	512	517	1	2	8	8	8	8	8	8	8	8	8	8	2	8	8	8	8	1	1	1	1	0	#NULL!	8
A937969101	A937969	2010	1	1	1	A937	1	36	#NULL!	1	2	4	3	7396.13	9484.26	#NULL!	22467.5	11533.1	12774.2	#NULL!	#NULL!	30329.9	#NULL!	512	517	1	2	8	8	8	8	2	8	1	8	2	8	2	8	8	8	8	1	1	1	1	0	0	2
A937969102	A937969	2010	1	1	1	A937	2	34	#NULL!	1	2	3	2	7396.13	8092.88	#NULL!	#NULL!	7306.68	7773.63	#NULL!	#NULL!	#NULL!	#NULL!	512	517	1	2	8	8	8	8	2	8	1	8	1	1	2	8	8	8	8	1	1	1	1	0	0	2
A937969103	A937969	2010	1	1	1	A937	1	7	#NULL!	1	2	1	#NULL!	7396.13	4834.98	#NULL!	#NULL!	5003.92	4931.08	#NULL!	#NULL!	#NULL!	#NULL!	512	517	1	2	8	8	8	8	8	8	8	8	8	8	2	8	8	8	8	1	1	1	1	0	#NULL!	8
A937969104	A937969	2010	1	1	1	A937	1	4	57	2	2	1	#NULL!	7396.13	6017.15	#NULL!	#NULL!	6161.95	5166.44	#NULL!	#NULL!	#NULL!	#NULL!	512	517	1	2	8	8	8	8	8	8	8	8	8	8	8	8	8	8	8	8	8	8	8	#NULL!	#NULL!	8
A937970701	A937970	2010	1	1	1	A937	2	63	#NULL!	2	2	1	6	7396.13	4397.17	4729.37	#NULL!	4396.07	3983.31	#NULL!	4950.07	#NULL!	#NULL!	512	517	1	2	8	2	8	8	2	8	2	3	1	3	2	8	8	8	8	1	1	1	1	0	0	2
A937972601	A937972	2010	1	1	1	A937	1	76	#NULL!	2	1	1	7	7396.13	7547.97	23729.5	#NULL!	#NULL!	#NULL!	#NULL!	#NULL!	#NULL!	#NULL!	512	517	1	2	8	2	8	8	2	8	1	8	2	8	2	8	8	8	8	1	1	1	1	0	0	2
A937973401	A937973	2010	1	1	1	A937	1	74	#NULL!	2	1	1	7	7396.13	3365.12	10829.9	59319.5	3646.61	3383.4	99805.2	10772.9	64413.3	103759	512	517	1	2	8	2	8	8	2	8	2	3	1	1	1	2	1	1	2	1	1	1	1	0	0	2
A937973402	A937973	2010	1	1	1	A937	2	71	#NULL!	2	1	1	7	7396.13	4237.85	#NULL!	#NULL!	3650.77	3648.36	#NULL!	#NULL!	#NULL!	#NULL!	512	517	1	2	8	1	3	2	1	1	1	8	1	1	2	8	8	8	8	1	1	1	1	0	1	2
A937973601	A937973	2010	1	1	1	A937	1	58	#NULL!	1	1	3	7	7396.13	6509.66	8336.51	#NULL!	7315.11	6904.83	#NULL!	9351.41	#NULL!	#NULL!	512	517	1	2	8	2	8	8	2	8	1	8	2	8	2	8	8	8	8	1	1	1	1	0	0	2
A937973603	A937973	2010	1	1	1	A937	1	14	#NULL!	1	1	1	#NULL!	7396.13	7203.79	#NULL!	#NULL!	6507.74	6106.34	#NULL!	#NULL!	#NULL!	#NULL!	512	517	1	2	8	8	8	8	8	8	1	8	1	1	2	8	8	8	8	1	1	1	1	0	#NULL!	2
A937973604	A937973	2010	1	1	1	A937	1	10	#NULL!	1	1	1	#NULL!	7396.13	7203.79	#NULL!	#NULL!	6507.74	6106.34	#NULL!	#NULL!	#NULL!	#NULL!	512	517	1	2	8	8	8	8	8	8	8	8	8	8	2	8	8	8	8	1	1	1	1	0	#NULL!	8
A937974501	A937974	2010	1	1	1	A937	1	57	#NULL!	3	3	2	3	7396.13	8679.55	8336.51	#NULL!	7315.11	9206.44	#NULL!	9351.41	#NULL!	#NULL!	512	517	1	1	2	2	8	8	2	8	2	3	2	8	1	2	1	1	2	2	1	1	1	0	0	2
A937974502	A937974	2010	1	1	1	A937	2	57	#NULL!	3	3	1	6	7396.13	7771.47	4806.02	28982.5	5577.88	5760.2	21923.2	5011.54	30665.6	23621.4	512	517	1	2	8	2	8	8	2	8	1	8	2	8	2	8	8	8	8	1	1	1	1	0	0	2
A937974503	A937974	2010	1	1	1	A937	2	30	#NULL!	3	3	3	3	7396.13	10790.5	#NULL!	#NULL!	7306.68	10364.8	#NULL!	#NULL!	#NULL!	#NULL!	512	517	1	2	8	8	8	8	2	8	1	8	2	8	2	8	8	8	8	1	1	1	1	0	0	2
A937975501	A937975	2010	1	1	1	A937	2	54	#NULL!	1	1	1	7	7396.13	5771.19	6203.84	#NULL!	6078.7	5592.68	#NULL!	6492.41	#NULL!	#NULL!	512	517	1	2	8	1	2	1	1	1	1	8	1	1	2	8	8	8	8	1	1	1	1	0	1	2
A937976401	A937976	2010	1	1	1	A937	1	59	#NULL!	2	2	2	5	7396.13	9764.49	16673	20691.3	10972.7	10357.2	21409.6	18702.8	22141.2	24603.3	512	517	1	2	8	2	8	8	2	8	1	8	2	8	2	8	8	8	8	1	1	1	1	0	0	2
A937976402	A937976	2010	1	1	1	A937	2	56	#NULL!	2	2	2	7	7396.13	8742.9	#NULL!	#NULL!	8366.82	6480.23	#NULL!	#NULL!	#NULL!	#NULL!	512	517	1	2	8	2	8	8	2	8	1	8	2	8	2	8	8	8	8	1	1	1	1	0	0	2
A937977501	A937977	2010	1	1	1	A937	2	47	#NULL!	1	2	3	3	7396.13	8754.28	#NULL!	#NULL!	#NULL!	#NULL!	#NULL!	#NULL!	#NULL!	#NULL!	512	517	1	1	2	2	8	8	2	8	1	8	2	8	2	8	8	8	8	1	1	1	1	0	0	2
A937977502	A937977	2010	1	1	1	A937	1	16	#NULL!	1	2	2	7	7396.13	8266.19	#NULL!	#NULL!	#NULL!	#NULL!	#NULL!	#NULL!	#NULL!	#NULL!	512	517	1	1	2	8	8	8	8	8	1	8	2	8	2	8	8	8	8	1	1	1	1	0	#NULL!	1
A937977503	A937977	2010	1	1	1	A937	2	13	#NULL!	2	2	1	#NULL!	7396.13	6402.28	#NULL!	22562.7	16495.7	17637.1	#NULL!	#NULL!	19122.1	#NULL!	512	517	1	2	8	8	8	8	8	8	1	8	2	8	2	8	8	8	8	1	1	1	1	0	#NULL!	1
A937978801	A937978	2010	1	1	1	A937	1	41	#NULL!	2	2	3	5	7396.13	9125.29	9669.46	26442.3	#NULL!	#NULL!	19705.8	#NULL!	#NULL!	#NULL!	512	517	1	2	8	2	8	8	2	8	1	8	2	8	2	8	8	8	8	1	1	1	1	0	0	2
A937978802	A937978	2010	1	1	1	A937	2	38	#NULL!	2	2	2	3	7396.13	6602.55	#NULL!	#NULL!	13571.8	10056.3	#NULL!	#NULL!	#NULL!	#NULL!	512	517	1	2	8	8	8	8	1	1	1	8	1	1	2	8	8	8	8	1	1	1	1	0	1	2
A937978803	A937978	2010	1	1	1	A937	2	8	#NULL!	2	2	1	#NULL!	7396.13	4368.28	#NULL!	#NULL!	4431.37	7476.99	#NULL!	#NULL!	#NULL!	#NULL!	512	517	1	2	8	8	8	8	8	8	8	8	8	8	2	8	8	8	8	1	1	1	1	0	#NULL!	8
A937979501	A937979	2010	1	1	1	A937	1	50	#NULL!	1	1	3	5	7396.13	11427	11099.9	#NULL!	13146.5	11660.5	#NULL!	13867.1	#NULL!	#NULL!	512	517	1	1	2	2	8	8	2	8	1	8	2	8	2	8	8	8	8	1	1	1	1	0	0	2
A937979502	A937979	2010	1	1	1	A937	1	17	#NULL!	1	1	2	5	7396.13	8266.19	#NULL!	17337.5	8963.86	12188.8	#NULL!	#NULL!	25579.6	#NULL!	512	517	1	1	2	8	8	8	8	8	1	8	2	8	1	2	2	2	2	2	2	1	2	1	#NULL!	1
A937979701	A937979	2010	1	1	1	A937	2	49	#NULL!	1	1	1	3	7396.13	8754.28	8990.72	11360	9321.44	10498.7	17867.2	9567.47	31514.8	19860.2	512	517	1	2	8	1	3	2	1	2	1	8	1	2	2	8	8	8	8	1	1	1	1	0	1	2
A937979702	A937979	2010	1	1	1	A937	2	14	#NULL!	1	1	1	#NULL!	7396.13	12804.6	#NULL!	#NULL!	6297	9314.2	#NULL!	#NULL!	#NULL!	#NULL!	512	517	1	2	8	8	8	8	8	8	1	8	1	1	2	8	8	8	8	1	1	1	1	0	#NULL!	1
A938972502	A938972	2010	1	1	1	A938	2	45	#NULL!	1	1	1	7	4573.78	11043.9	11342.1	#NULL!	7839.57	5886.46	#NULL!	12069.7	#NULL!	#NULL!	512	517	1	2	8	2	8	8	2	8	1	8	2	8	2	8	8	8	8	1	1	1	1	0	0	2
A938972503	A938972	2010	1	1	1	A938	2	15	#NULL!	1	1	1	7	4573.78	8610.75	#NULL!	#NULL!	10565	8269.74	#NULL!	#NULL!	#NULL!	#NULL!	512	517	1	2	8	8	8	8	8	8	1	8	2	8	2	8	8	8	8	1	1	1	1	0	#NULL!	2
A938972504	A938972	2010	1	1	1	A938	2	14	#NULL!	1	1	1	#NULL!	4573.78	4038.36	#NULL!	14231.8	5295.94	5222.32	#NULL!	#NULL!	16082.2	#NULL!	512	517	1	2	8	8	8	8	8	8	1	8	2	8	2	8	8	8	8	1	1	1	1	0	#NULL!	2
A938972602	A938972	2010	1	1	1	A938	1	44	#NULL!	1	2	1	3	4573.78	5755.95	9148.79	33358	6059.04	7911.48	37289.4	11563.8	39994.5	51814.8	512	517	1	2	8	2	8	8	2	8	1	8	2	8	2	8	8	8	8	1	1	1	1	0	0	2
A938972603	A938972	2010	1	1	1	A938	2	43	#NULL!	1	2	1	6	4573.78	5348.84	10211.7	#NULL!	5333.53	4982.66	#NULL!	9497.39	#NULL!	#NULL!	512	517	1	2	8	2	8	8	2	8	1	8	1	2	1	1	2	2	1	2	2	1	1	0	0	2
A938972605	A938972	2010	1	1	1	A938	2	19	#NULL!	2	2	3	6	4573.78	8610.75	#NULL!	#NULL!	7923.72	6202.3	#NULL!	#NULL!	#NULL!	#NULL!	512	517	1	1	2	8	8	8	2	8	1	8	2	8	1	2	2	2	1	2	2	2	2	1	0	1
A938973502	A938973	2010	1	1	1	A938	2	58	#NULL!	1	1	3	3	4573.78	4902	6062.97	18281.3	3518.36	3633.36	13828.5	6322.26	19342.9	14899.7	512	517	1	2	8	1	1	1	1	2	2	3	1	2	2	8	8	8	8	1	1	1	1	0	1	2
A938973503	A938973	2010	1	1	1	A938	1	34	#NULL!	1	1	4	1	4573.78	9706.39	#NULL!	#NULL!	11927.5	13841.4	#NULL!	#NULL!	#NULL!	#NULL!	512	517	1	2	8	8	8	8	2	8	1	8	2	8	2	8	8	8	8	1	1	1	1	0	0	2
A938973504	A938973	2010	1	1	1	A938	1	32	#NULL!	1	1	4	5	4573.78	9706.39	#NULL!	#NULL!	11927.5	13841.4	#NULL!	#NULL!	#NULL!	#NULL!	512	517	1	2	8	8	8	8	2	8	1	8	2	8	2	8	8	8	8	1	1	1	1	0	0	2
A938973601	A938973	2010	1	1	1	A938	2	46	#NULL!	1	2	3	3	4573.78	5521.93	5671.07	#NULL!	5879.68	4414.84	#NULL!	6034.87	#NULL!	#NULL!	512	517	1	2	8	2	8	8	2	8	1	8	2	8	2	8	8	8	8	1	1	1	1	0	0	2
A938973602	A938973	2010	1	1	1	A938	2	19	#NULL!	2	2	3	3	4573.78	8610.75	#NULL!	#NULL!	7923.72	6202.3	#NULL!	#NULL!	#NULL!	#NULL!	512	517	1	1	2	8	8	8	2	8	1	8	2	8	1	1	2	2	1	2	2	2	1	0	0	2
A938973603	A938973	2010	1	1	1	A938	2	14	#NULL!	1	2	1	#NULL!	4573.78	4038.36	#NULL!	#NULL!	3971.95	3916.74	#NULL!	#NULL!	#NULL!	#NULL!	512	517	1	2	8	8	8	8	8	8	1	8	2	8	2	8	8	8	8	1	1	1	1	0	#NULL!	1
A938973701	A938973	2010	1	1	1	A938	2	67	#NULL!	4	3	1	6	4573.78	2029.73	2913.48	#NULL!	4177.35	4469.47	#NULL!	6037.49	#NULL!	#NULL!	512	517	1	2	8	2	8	8	2	8	1	8	2	8	2	8	8	8	8	1	1	1	1	0	0	2
A938973702	A938973	2010	1	1	1	A938	2	41	#NULL!	2	3	3	3	4573.78	5348.84	6807.78	#NULL!	#NULL!	#NULL!	#NULL!	#NULL!	#NULL!	#NULL!	512	517	1	1	1	2	8	8	1	2	1	8	2	8	1	1	2	2	1	2	2	1	1	0	1	2
A938973901	A938973	2010	1	1	1	A938	2	49	#NULL!	1	2	3	3	4573.78	5521.93	11342.1	#NULL!	#NULL!	#NULL!	#NULL!	#NULL!	#NULL!	#NULL!	512	517	1	2	8	2	8	8	2	8	2	3	2	8	1	2	2	2	2	1	2	1	1	0	0	2
A938973902	A938973	2010	1	1	1	A938	1	54	#NULL!	1	2	4	5	4573.78	7207.78	#NULL!	32434.7	16584.8	14710.2	#NULL!	#NULL!	40413.7	#NULL!	512	517	1	2	8	2	8	8	2	8	1	8	2	8	1	2	2	1	2	2	2	1	1	0	0	2
A938973903	A938973	2010	1	1	1	A938	1	23	#NULL!	1	2	4	3	4573.78	7784.04	#NULL!	#NULL!	#NULL!	#NULL!	#NULL!	#NULL!	#NULL!	#NULL!	512	517	1	2	8	8	8	8	2	8	1	8	2	8	2	8	8	8	8	1	1	1	1	0	0	2
A938973904	A938973	2010	1	1	1	A938	2	22	#NULL!	1	2	4	3	4573.78	4903.48	#NULL!	#NULL!	12499.6	13984.5	#NULL!	#NULL!	#NULL!	#NULL!	512	517	1	2	8	8	8	8	2	8	1	8	2	8	2	8	8	8	8	1	1	1	1	0	0	2
A938974501	A938974	2010	1	1	1	A938	2	47	#NULL!	1	2	3	5	4573.78	5521.93	11342.1	#NULL!	5879.68	4414.84	#NULL!	12069.7	#NULL!	#NULL!	512	517	1	1	2	2	8	8	2	8	1	8	2	8	1	2	2	1	1	2	2	2	1	0	0	2
A938974502	A938974	2010	1	1	1	A938	2	24	#NULL!	1	2	3	1	4573.78	4903.48	#NULL!	20970.8	6249.8	6992.25	#NULL!	#NULL!	25356.7	#NULL!	512	517	1	2	8	8	8	8	1	2	1	8	1	2	1	2	1	1	2	1	2	1	1	0	1	2
A938974503	A938974	2010	1	1	1	A938	1	27	#NULL!	1	2	3	7	4573.78	8739.82	#NULL!	#NULL!	10226.6	11172.1	#NULL!	#NULL!	#NULL!	#NULL!	512	517	1	2	8	8	8	8	2	8	1	8	2	8	2	8	8	8	8	1	1	1	1	0	0	2
A938974504	A938974	2010	1	1	1	A938	1	46	#NULL!	1	2	3	5	4573.78	9193.98	#NULL!	#NULL!	11041	9173.46	#NULL!	#NULL!	#NULL!	#NULL!	512	517	1	2	8	2	8	8	2	8	1	8	2	8	2	8	8	8	8	1	1	1	1	0	0	2
A938975701	A938975	2010	1	1	1	A938	1	37	#NULL!	1	1	3	7	4573.78	5982.38	#NULL!	14171.8	7274.71	8057.58	#NULL!	#NULL!	19131.2	#NULL!	512	517	1	2	8	8	8	8	2	8	1	8	2	8	2	8	8	8	8	1	1	1	1	0	0	2
A938975702	A938975	2010	1	1	1	A938	2	64	#NULL!	1	1	1	7	4573.78	2773.6	#NULL!	#NULL!	2772.9	2512.55	#NULL!	#NULL!	#NULL!	#NULL!	512	517	1	2	8	2	8	8	2	8	1	8	2	8	2	8	8	8	8	1	1	1	1	0	0	2
A938976602	A938976	2010	1	1	1	A938	2	48	#NULL!	2	3	1	7	4573.78	8282.9	11342.1	21496.6	11759.4	8829.69	22540.1	12069.7	26504.7	25054.4	512	517	1	2	8	2	8	8	2	8	1	8	2	8	2	8	8	8	8	1	1	1	1	0	0	2
A938976604	A938976	2010	1	1	1	A938	1	18	#NULL!	2	3	2	7	4573.78	5214.06	#NULL!	#NULL!	11308.3	15376.7	#NULL!	#NULL!	#NULL!	#NULL!	512	517	1	2	8	8	8	8	8	8	1	8	2	8	2	8	8	8	8	1	1	1	1	0	#NULL!	1
A938976801	A938976	2010	1	1	1	A938	1	73	#NULL!	4	3	1	6	4573.78	3183.92	#NULL!	#NULL!	3450.26	3201.22	#NULL!	#NULL!	#NULL!	#NULL!	512	517	1	2	8	2	8	8	2	8	1	8	2	8	2	8	8	8	8	1	1	1	1	0	0	2
A938976802	A938976	2010	1	1	1	A938	2	72	#NULL!	4	3	1	7	4573.78	4009.65	13040.7	#NULL!	3454.19	3451.91	#NULL!	14043.3	#NULL!	#NULL!	512	517	1	2	8	2	8	8	2	8	2	3	2	8	2	8	8	8	8	1	1	1	1	0	0	2
A938977201	A938977	2010	1	1	1	A938	1	36	#NULL!	1	2	3	5	4573.78	5982.38	#NULL!	#NULL!	7274.71	8057.58	#NULL!	#NULL!	#NULL!	#NULL!	512	517	1	2	8	8	8	8	2	8	1	8	2	8	2	8	8	8	8	1	1	1	1	0	0	2
A938977501	A938977	2010	1	1	1	A938	1	51	#NULL!	3	4	4	2	4573.78	9610.37	#NULL!	#NULL!	8292.42	9806.8	#NULL!	#NULL!	#NULL!	#NULL!	512	517	1	2	8	2	8	8	2	8	1	8	2	8	2	8	8	8	8	1	1	1	1	0	0	2
A938977502	A938977	2010	1	1	1	A938	2	54	#NULL!	3	4	3	3	4573.78	4853.72	7826.38	#NULL!	3834.26	4703.59	#NULL!	8190.42	#NULL!	#NULL!	512	517	1	2	8	2	8	8	2	8	1	8	2	8	2	8	8	8	8	1	1	1	1	0	0	2
A938977504	A938977	2010	1	1	1	A938	1	23	#NULL!	4	4	2	7	4573.78	10378.7	#NULL!	29613	16994.5	23661.1	#NULL!	#NULL!	43085.5	#NULL!	512	517	1	2	8	8	8	8	2	8	1	8	2	8	1	2	1	1	2	1	1	1	1	0	0	2
A938977701	A938977	2010	1	1	1	A938	2	26	#NULL!	3	3	4	2	4573.78	7898.3	#NULL!	10166.7	7392.77	6122.85	#NULL!	#NULL!	11371.3	#NULL!	512	517	1	2	8	8	8	8	2	8	1	8	2	8	2	8	8	8	8	1	1	1	1	0	0	2
A938977702	A938977	2010	1	1	1	A938	2	26	#NULL!	3	3	4	2	4573.78	7898.3	#NULL!	#NULL!	7392.77	6122.85	#NULL!	#NULL!	#NULL!	#NULL!	512	517	1	1	2	8	8	8	2	8	1	8	2	8	1	1	1	1	2	2	2	2	1	0	0	2
A938978201	A938978	2010	1	1	1	A938	2	33	#NULL!	2	3	3	1	4573.78	5104.74	#NULL!	#NULL!	4608.83	4903.37	#NULL!	#NULL!	#NULL!	#NULL!	512	517	1	2	8	8	8	8	2	8	1	8	2	8	2	8	8	8	8	1	1	1	1	0	0	2
A938978202	A938978	2010	1	1	1	A938	1	4	51	2	3	1	#NULL!	4573.78	3795.44	#NULL!	#NULL!	3886.77	3258.83	#NULL!	#NULL!	#NULL!	#NULL!	512	517	1	2	8	8	8	8	8	8	8	8	8	8	8	8	8	8	8	8	8	8	8	#NULL!	#NULL!	8
A938978203	A938978	2010	1	1	1	A938	1	10	#NULL!	2	3	1	#NULL!	4573.78	4543.93	#NULL!	8424.67	4104.88	3851.69	#NULL!	#NULL!	13542.4	#NULL!	512	517	1	2	8	8	8	8	8	8	8	8	8	8	2	8	8	8	8	1	1	1	1	0	#NULL!	8
A938978204	A938978	2010	1	1	1	A938	2	66	#NULL!	4	3	3	6	4573.78	2029.73	2913.48	#NULL!	2088.68	2234.74	#NULL!	3018.75	#NULL!	#NULL!	512	517	1	2	8	2	8	8	2	8	1	8	2	8	2	8	8	8	8	1	1	1	1	0	0	2
A938978801	A938978	2010	1	1	1	A938	1	77	#NULL!	1	1	3	7	4573.78	2380.51	#NULL!	#NULL!	2812.65	2648.02	#NULL!	#NULL!	#NULL!	#NULL!	512	517	1	2	8	2	8	8	2	8	1	8	2	8	2	8	8	8	8	1	1	1	1	0	0	2
A938979001	A938979	2010	1	1	1	A938	1	71	#NULL!	1	1	1	7	4573.78	2122.61	#NULL!	#NULL!	2300.17	2134.15	#NULL!	#NULL!	#NULL!	#NULL!	512	517	1	2	8	2	8	8	2	8	1	8	2	8	2	8	8	8	8	1	1	1	1	0	0	2
A938979701	A938979	2010	1	1	1	A938	1	69	#NULL!	1	1	2	5	4573.78	2375.98	#NULL!	#NULL!	2590.16	2255.94	#NULL!	#NULL!	#NULL!	#NULL!	512	517	1	2	8	2	8	8	2	8	1	8	2	8	2	8	8	8	8	1	1	1	1	0	0	2
A938979702	A938979	2010	1	1	1	A938	2	62	#NULL!	1	1	1	3	4573.78	2773.6	5966.28	13096.7	2772.9	2512.55	23025	6244.7	12643.2	23235.1	512	517	1	2	8	2	8	8	2	8	1	8	2	8	2	8	8	8	8	1	1	1	1	0	0	2
A939967701	A939967	2010	1	1	2	A939	1	60	#NULL!	4	4	3	3	3425.52	2348.23	3081.81	#NULL!	2225.26	2355.39	#NULL!	3355.84	#NULL!	#NULL!	501	501	1	2	8	2	8	8	2	8	2	3	1	1	2	8	8	8	8	1	1	1	1	0	0	2
A939967702	A939967	2010	1	1	2	A939	2	57	#NULL!	4	4	2	7	3425.52	2915.48	2403.98	10872.8	2790.07	2160.95	10966	2506.79	11504.3	11815.5	501	501	1	2	8	2	8	8	2	8	1	8	2	8	2	8	8	8	8	1	1	1	1	0	0	2
A939967703	A939967	2010	1	1	2	A939	2	29	#NULL!	4	4	4	2	3425.52	6263.38	#NULL!	#NULL!	5862.49	4855.44	#NULL!	#NULL!	#NULL!	#NULL!	501	501	1	2	8	8	8	8	2	8	1	8	2	8	2	8	8	8	8	1	1	1	1	0	0	1
A939968001	A939968	2010	1	1	2	A939	1	43	#NULL!	4	4	4	1	3425.52	4564.49	9673.37	13226.5	4804.84	6273.83	19713.8	12226.8	31715.8	27392.9	501	501	1	2	8	2	8	8	2	8	1	8	2	8	1	1	2	2	2	1	1	1	1	0	0	2
A939968002	A939968	2010	1	1	2	A939	2	40	#NULL!	4	4	4	7	3425.52	4241.65	#NULL!	#NULL!	4229.51	3951.27	#NULL!	#NULL!	#NULL!	#NULL!	501	501	1	2	8	2	8	8	2	8	1	8	2	8	2	8	8	8	8	1	1	1	1	0	0	2
A939968003	A939968	2010	1	1	2	A939	1	14	#NULL!	4	4	1	#NULL!	3425.52	3603.35	#NULL!	#NULL!	3255.19	3054.41	#NULL!	#NULL!	#NULL!	#NULL!	501	501	1	2	8	8	8	8	8	8	1	8	2	8	1	1	1	1	2	1	1	1	1	0	#NULL!	1
A939968004	A939968	2010	1	1	2	A939	1	11	#NULL!	4	4	1	#NULL!	3425.52	3603.35	#NULL!	#NULL!	3255.19	3054.41	#NULL!	#NULL!	#NULL!	#NULL!	501	501	1	2	8	8	8	8	8	8	8	8	8	8	2	8	8	8	8	1	1	1	1	0	#NULL!	8
A939968301	A939968	2010	1	1	2	A939	1	42	#NULL!	4	4	4	2	3425.52	4564.49	9673.37	#NULL!	#NULL!	#NULL!	#NULL!	#NULL!	#NULL!	#NULL!	501	501	1	2	8	2	8	8	2	8	1	8	2	8	2	8	8	8	8	1	1	1	2	1	0	2
A939968302	A939968	2010	1	1	2	A939	2	40	#NULL!	4	4	4	1	3425.52	4241.65	#NULL!	17857.9	6344.27	5268.36	#NULL!	#NULL!	21575.9	#NULL!	501	501	1	2	8	2	8	8	1	2	1	8	2	8	2	8	8	8	8	1	1	1	1	0	1	2
A939968303	A939968	2010	1	1	2	A939	1	15	#NULL!	4	4	1	7	3425.52	4134.77	#NULL!	#NULL!	6725.62	8129.17	#NULL!	#NULL!	#NULL!	#NULL!	501	501	1	1	2	8	8	8	8	8	1	8	2	8	2	8	8	8	8	1	2	1	1	0	#NULL!	2
A939968304	A939968	2010	1	1	2	A939	2	9	#NULL!	4	4	1	#NULL!	3425.52	2185.02	#NULL!	#NULL!	2216.58	3324.45	#NULL!	#NULL!	#NULL!	#NULL!	501	501	1	2	8	8	8	8	8	8	8	8	8	8	2	8	8	8	8	1	1	1	1	0	#NULL!	8
A939968701	A939968	2010	1	1	2	A939	1	62	#NULL!	3	3	3	7	3425.52	3130.97	3081.81	13755.8	#NULL!	#NULL!	12834.9	#NULL!	#NULL!	#NULL!	501	501	1	2	8	2	8	8	2	8	1	8	2	8	2	8	8	8	8	1	1	1	1	0	0	2
A939968702	A939968	2010	1	1	2	A939	2	58	#NULL!	3	3	3	7	3425.52	3887.31	2403.98	#NULL!	5580.14	3601.58	#NULL!	5013.57	#NULL!	#NULL!	501	501	1	2	8	2	8	8	2	8	1	8	2	8	2	8	8	8	8	1	1	1	1	0	0	2
A939968705	A939968	2010	1	1	2	A939	2	32	#NULL!	3	3	4	3	3425.52	5397.44	#NULL!	#NULL!	7309.64	6480.65	#NULL!	#NULL!	#NULL!	#NULL!	501	501	1	2	8	8	8	8	2	8	1	8	2	8	2	8	8	8	8	1	1	1	1	0	0	2
A939968706	A939968	2010	1	1	2	A939	2	3	47	3	3	1	#NULL!	3425.52	2766.84	#NULL!	#NULL!	2845.45	3813.67	#NULL!	#NULL!	#NULL!	#NULL!	501	501	1	8	8	8	8	8	8	8	8	8	8	8	8	8	8	8	8	8	8	8	8	#NULL!	#NULL!	8
A939969502	A939969	2010	1	1	2	A939	2	27	#NULL!	4	4	4	7	3425.52	6263.38	#NULL!	#NULL!	5862.49	4855.44	#NULL!	#NULL!	#NULL!	#NULL!	501	501	1	2	8	8	8	8	2	8	1	8	1	1	2	8	8	8	8	1	1	1	1	0	0	2
A939969504	A939969	2010	1	1	2	A939	2	54	#NULL!	4	4	4	7	3425.52	2886.76	3103.17	#NULL!	3040.58	2797.47	#NULL!	3247.52	#NULL!	#NULL!	501	501	1	2	8	2	8	8	2	8	1	8	1	1	2	8	8	8	8	1	1	1	1	0	0	2
A939969602	A939969	2010	1	1	2	A939	2	31	#NULL!	3	3	4	1	3425.52	8096.15	#NULL!	#NULL!	7309.64	5184.52	#NULL!	#NULL!	#NULL!	#NULL!	501	501	1	2	8	8	8	8	2	8	1	8	2	8	2	8	8	8	8	1	1	1	1	0	0	2
A939969603	A939969	2010	1	1	2	A939	2	7	#NULL!	3	3	1	#NULL!	3425.52	2185.02	#NULL!	#NULL!	2216.58	3324.45	#NULL!	#NULL!	#NULL!	#NULL!	501	501	1	2	8	8	8	8	8	8	8	8	8	8	2	8	8	8	8	1	1	1	1	0	#NULL!	8
A939969604	A939969	2010	1	1	2	A939	1	2	35	3	3	1	#NULL!	3425.52	3009.79	#NULL!	#NULL!	3082.22	3445.69	#NULL!	#NULL!	#NULL!	#NULL!	501	501	1	8	8	8	8	8	8	8	8	8	8	8	8	8	8	8	8	8	8	8	8	#NULL!	#NULL!	8
A939970202	A939970	2010	1	1	2	A939	2	52	#NULL!	4	4	4	7	3425.52	2886.76	3103.17	#NULL!	7601.45	6993.68	#NULL!	3247.52	#NULL!	#NULL!	501	501	1	2	8	1	2	2	1	2	1	8	1	1	2	8	8	8	8	1	1	1	1	0	1	2
A939970203	A939970	2010	1	1	2	A939	1	60	#NULL!	4	4	4	1	3425.52	2348.23	3081.81	#NULL!	5563.16	5888.49	#NULL!	3355.84	#NULL!	#NULL!	501	501	1	2	8	2	8	8	1	2	1	8	2	8	2	8	8	8	8	1	2	1	1	0	1	2
A939970204	A939970	2010	1	1	2	A939	2	28	#NULL!	4	4	4	1	3425.52	6263.38	#NULL!	20155.6	#NULL!	#NULL!	#NULL!	#NULL!	#NULL!	#NULL!	501	501	1	2	8	8	8	8	2	8	1	8	2	8	2	8	8	8	8	1	1	1	1	0	0	1
A939970205	A939970	2010	1	1	2	A939	2	29	#NULL!	4	4	4	7	3425.52	6263.38	#NULL!	#NULL!	#NULL!	#NULL!	#NULL!	#NULL!	#NULL!	#NULL!	501	501	1	1	2	8	8	8	1	2	1	8	2	8	1	2	2	1	2	1	2	1	1	0	1	2
A939970206	A939970	2010	1	1	2	A939	1	35	#NULL!	4	4	4	1	3425.52	4744.05	#NULL!	#NULL!	#NULL!	#NULL!	#NULL!	#NULL!	#NULL!	#NULL!	501	501	1	2	8	8	8	8	2	8	1	8	2	8	2	8	8	8	8	1	1	1	1	0	0	2
A939971401	A939971	2010	1	1	2	A939	1	71	#NULL!	3	2	4	7	3425.52	1683.24	2708.58	#NULL!	1824.04	1692.39	#NULL!	2694.32	#NULL!	#NULL!	501	501	1	2	8	2	8	8	2	8	1	8	2	8	2	8	8	8	8	1	1	1	1	0	0	2
A939971402	A939971	2010	1	1	2	A939	2	67	#NULL!	3	2	3	7	3425.52	1609.59	2310.4	#NULL!	1656.33	1772.15	#NULL!	2393.88	#NULL!	#NULL!	501	501	1	2	8	2	8	8	2	8	1	8	2	8	2	8	8	8	8	1	1	1	1	0	0	2
A939972001	A939972	2010	1	1	2	A939	2	57	#NULL!	2	2	1	7	3425.52	2915.48	2403.98	#NULL!	4185.1	3241.42	#NULL!	2506.79	#NULL!	#NULL!	501	501	1	2	8	1	2	2	2	8	1	8	2	8	2	8	8	8	8	1	1	1	1	0	0	2
A939972002	A939972	2010	1	1	2	A939	1	34	#NULL!	2	2	4	2	3425.52	5772.9	#NULL!	23969	#NULL!	#NULL!	#NULL!	#NULL!	#NULL!	#NULL!	501	501	1	2	8	8	8	8	2	8	1	8	2	8	2	8	8	8	8	1	1	1	1	0	0	1
A939972003	A939972	2010	1	1	2	A939	2	30	#NULL!	2	2	4	1	3425.52	4048.08	#NULL!	#NULL!	5482.23	5832.58	#NULL!	#NULL!	#NULL!	#NULL!	501	501	1	2	8	8	8	8	2	8	1	8	2	8	2	8	8	8	8	2	1	1	1	0	0	1
A939972501	A939972	2010	1	1	2	A939	1	36	#NULL!	2	3	4	2	3425.52	4744.05	#NULL!	#NULL!	5768.87	6389.69	#NULL!	#NULL!	#NULL!	#NULL!	501	501	1	1	2	8	8	8	2	8	1	8	2	8	2	8	8	8	8	1	1	1	1	0	0	2
A939972502	A939972	2010	1	1	2	A939	2	33	#NULL!	2	3	4	7	3425.52	4048.08	#NULL!	#NULL!	3654.82	3888.39	#NULL!	#NULL!	#NULL!	#NULL!	501	501	1	2	8	8	8	8	2	8	1	8	2	8	2	8	8	8	8	1	1	1	1	0	0	2
A939972503	A939972	2010	1	1	2	A939	2	8	#NULL!	2	3	1	#NULL!	3425.52	2185.02	#NULL!	#NULL!	2216.58	2493.34	#NULL!	#NULL!	#NULL!	#NULL!	501	501	1	1	1	8	8	8	8	8	8	8	8	8	1	1	2	2	2	1	1	1	1	0	#NULL!	8
A939972504	A939972	2010	1	1	2	A939	1	6	78	2	3	1	#NULL!	3425.52	2418.47	#NULL!	#NULL!	2502.97	2466.54	#NULL!	#NULL!	#NULL!	#NULL!	501	501	1	2	8	8	8	8	8	8	8	8	8	8	2	8	8	8	8	1	1	1	1	0	#NULL!	8
A939972601	A939972	2010	1	1	2	A939	1	64	#NULL!	4	4	3	5	3425.52	2348.23	3081.81	#NULL!	4450.53	4710.79	#NULL!	3355.84	#NULL!	#NULL!	501	501	1	1	2	2	8	8	2	8	1	8	2	8	1	1	2	1	2	1	1	1	1	0	0	2
A939972602	A939972	2010	1	1	2	A939	2	59	#NULL!	4	4	2	7	3425.52	2915.48	2403.98	#NULL!	5580.14	4321.9	#NULL!	2506.79	#NULL!	#NULL!	501	501	1	1	2	2	8	8	2	8	3	3	1	1	1	2	2	2	1	2	1	1	1	0	0	2
A939973602	A939973	2010	1	1	2	A939	2	47	#NULL!	4	4	4	7	3425.52	4378.91	4497.18	#NULL!	4662.61	3500.99	#NULL!	4785.67	#NULL!	#NULL!	501	501	1	2	8	2	8	8	2	8	1	8	2	8	2	8	8	8	8	1	1	1	1	0	0	2
A939973603	A939973	2010	1	1	2	A939	2	19	#NULL!	4	4	3	7	3425.52	6828.35	#NULL!	#NULL!	6283.54	4918.45	#NULL!	#NULL!	#NULL!	#NULL!	501	501	1	2	8	8	8	8	2	8	1	8	2	8	2	8	8	8	8	1	1	1	1	0	0	2
A939973604	A939973	2010	1	1	2	A939	1	16	#NULL!	4	4	2	7	3425.52	4134.77	#NULL!	#NULL!	4483.74	6096.87	#NULL!	#NULL!	#NULL!	#NULL!	501	501	1	1	1	8	8	8	8	8	1	8	2	8	1	1	2	1	1	1	2	1	1	0	#NULL!	1
A939973901	A939973	2010	1	1	2	A939	1	42	#NULL!	4	4	4	1	3425.52	4564.49	4836.68	#NULL!	4804.84	6273.83	#NULL!	6113.42	#NULL!	#NULL!	501	501	1	2	8	2	8	8	1	1	1	8	2	8	2	8	8	8	8	1	1	1	1	0	1	2
A939973902	A939973	2010	1	1	2	A939	2	42	#NULL!	4	4	4	7	3425.52	4241.65	5398.59	#NULL!	4229.51	3951.27	#NULL!	5020.98	#NULL!	#NULL!	501	501	1	1	2	2	8	8	2	8	1	8	2	8	1	2	2	2	1	2	2	1	1	0	0	2
A939973903	A939973	2010	1	1	2	A939	2	15	#NULL!	4	4	1	7	3425.52	6828.35	#NULL!	5644.75	6283.54	4918.45	#NULL!	#NULL!	12478.3	#NULL!	501	501	1	2	8	8	8	8	8	8	1	8	2	8	2	8	8	8	8	1	1	1	1	0	#NULL!	1
A939973904	A939973	2010	1	1	2	A939	2	9	#NULL!	4	4	1	#NULL!	3425.52	2185.02	#NULL!	#NULL!	2216.58	2493.34	#NULL!	#NULL!	#NULL!	#NULL!	501	501	1	2	8	8	8	8	8	8	8	8	8	8	2	8	8	8	8	1	1	1	1	0	#NULL!	8
A939974502	A939974	2010	1	1	2	A939	2	40	#NULL!	3	4	3	2	3425.52	8483.3	#NULL!	#NULL!	4229.51	5268.36	#NULL!	#NULL!	#NULL!	#NULL!	501	501	1	2	8	2	8	8	2	8	1	8	2	8	2	8	8	8	8	1	1	1	1	0	0	2
A939974503	A939974	2010	1	1	2	A939	1	12	#NULL!	3	4	1	#NULL!	3425.52	3603.35	#NULL!	13361.6	3255.19	4072.54	#NULL!	#NULL!	14318.9	#NULL!	501	501	1	2	8	8	8	8	8	8	1	8	2	8	2	8	8	8	8	1	1	1	1	0	#NULL!	1
A939974504	A939974	2010	1	1	2	A939	1	10	#NULL!	3	4	1	#NULL!	3425.52	3603.35	#NULL!	#NULL!	3255.19	4072.54	#NULL!	#NULL!	#NULL!	#NULL!	501	501	1	2	8	8	8	8	8	8	8	8	8	8	2	8	8	8	8	1	1	1	1	0	#NULL!	8
A939975302	A939975	2010	1	1	2	A939	2	35	#NULL!	#NULL!	#NULL!	4	1	3425.52	6605.22	#NULL!	#NULL!	#NULL!	#NULL!	#NULL!	#NULL!	#NULL!	#NULL!	501	501	1	1	2	8	8	8	2	8	1	8	1	2	1	1	1	1	2	1	1	1	1	0	0	1
A939975304	A939975	2010	1	1	2	A939	2	2	33	#NULL!	#NULL!	1	#NULL!	3425.52	5533.69	#NULL!	#NULL!	#NULL!	#NULL!	#NULL!	#NULL!	#NULL!	#NULL!	501	501	1	8	8	8	8	8	8	8	8	8	8	8	8	8	8	8	8	8	8	8	8	#NULL!	#NULL!	8
A939975901	A939975	2010	1	1	2	A939	1	58	#NULL!	2	3	1	6	3425.52	8140.37	6254.91	#NULL!	#NULL!	#NULL!	#NULL!	#NULL!	#NULL!	#NULL!	501	501	1	2	8	2	8	8	2	8	1	8	2	8	2	8	8	8	8	1	1	1	1	0	0	2
A939975902	A939975	2010	1	1	2	A939	2	54	#NULL!	2	3	2	6	3425.52	7216.9	4654.76	#NULL!	15202.9	13987.4	#NULL!	9742.55	#NULL!	#NULL!	501	501	1	2	8	2	8	8	2	8	2	3	1	1	1	1	2	1	2	1	1	1	1	0	0	2
A939976601	A939976	2010	1	1	2	A939	1	57	#NULL!	4	4	4	1	3425.52	3256.15	#NULL!	10349.9	5488.55	5180.72	#NULL!	#NULL!	11075.1	#NULL!	501	501	1	2	8	2	8	8	2	8	1	8	2	8	2	8	8	8	8	1	1	1	1	0	0	2
A939976602	A939976	2010	1	1	2	A939	2	53	#NULL!	4	4	4	3	3425.52	2886.76	6206.35	#NULL!	4560.87	4196.21	#NULL!	6495.04	#NULL!	#NULL!	501	501	1	2	8	1	2	1	2	8	1	8	2	8	2	8	8	8	8	1	1	1	1	0	0	2
A939976603	A939976	2010	1	1	2	A939	1	23	#NULL!	4	4	3	7	3425.52	6172.77	#NULL!	#NULL!	#NULL!	#NULL!	#NULL!	#NULL!	#NULL!	#NULL!	501	501	1	2	8	8	8	8	2	8	1	8	2	8	2	8	8	8	8	1	1	1	1	0	0	1
A939979201	A939979	2010	1	1	2	A939	1	41	#NULL!	3	3	4	2	3425.52	4564.49	4836.68	#NULL!	4804.84	6273.83	#NULL!	6113.42	#NULL!	#NULL!	501	501	1	2	8	1	1	2	2	8	1	8	2	8	2	8	8	8	8	1	1	1	1	0	0	2
A939979202	A939979	2010	1	1	2	A939	2	35	#NULL!	3	3	4	1	3425.52	3302.61	#NULL!	11403.1	3394.31	3353.46	#NULL!	#NULL!	20821.7	#NULL!	501	501	1	2	8	8	8	8	2	8	1	8	2	8	2	8	8	8	8	1	1	1	1	0	0	1
A939979203	A939979	2010	1	1	2	A939	2	13	#NULL!	3	3	1	#NULL!	3425.52	3202.44	#NULL!	#NULL!	3149.77	3105.99	#NULL!	#NULL!	#NULL!	#NULL!	501	501	1	2	8	8	8	8	8	8	1	8	2	8	2	8	8	8	8	1	1	1	1	0	#NULL!	2
A939979204	A939979	2010	1	1	2	A939	1	11	#NULL!	3	3	1	#NULL!	3425.52	3603.35	#NULL!	#NULL!	3255.19	3054.41	#NULL!	#NULL!	#NULL!	#NULL!	501	501	1	2	8	8	8	8	8	8	8	8	8	8	2	8	8	8	8	1	1	1	1	0	#NULL!	8
A939979205	A939979	2010	1	1	2	A939	2	9	#NULL!	3	3	1	#NULL!	3425.52	2185.02	#NULL!	#NULL!	2216.58	2493.34	#NULL!	#NULL!	#NULL!	#NULL!	501	501	1	2	8	8	8	8	8	8	8	8	8	8	2	8	8	8	8	1	1	1	1	0	#NULL!	8
A940967701	A940967	2010	1	1	2	A940	1	45	#NULL!	2	3	4	1	2655.7	6280.42	5062.11	#NULL!	7542.09	6266.4	#NULL!	6709.06	#NULL!	#NULL!	501	501	1	2	8	2	8	8	2	8	1	8	2	8	1	1	1	1	2	1	1	1	1	0	0	2
A940967702	A940967	2010	1	1	2	A940	2	42	#NULL!	3	3	4	1	2655.7	3653.8	4650.4	#NULL!	3643.34	3403.66	#NULL!	4325.12	#NULL!	#NULL!	501	501	1	1	2	2	8	8	2	8	1	8	2	8	1	1	1	1	2	1	1	1	1	0	0	2
A940967703	A940967	2010	1	1	2	A940	2	3	44	3	3	1	#NULL!	2655.7	2383.39	#NULL!	#NULL!	2451.1	1971.08	#NULL!	#NULL!	#NULL!	#NULL!	501	501	1	8	8	8	8	8	8	8	8	8	8	8	8	8	8	8	8	8	8	8	8	#NULL!	#NULL!	8
A940968101	A940968	2010	1	1	2	A940	1	42	#NULL!	3	4	4	1	2655.7	3931.9	4166.37	#NULL!	4138.94	5404.34	#NULL!	5266.16	#NULL!	#NULL!	501	501	1	2	8	2	8	8	2	8	1	8	1	1	2	8	8	8	8	1	1	1	1	0	0	2
A940968102	A940968	2010	1	1	2	A940	2	38	#NULL!	3	4	4	7	2655.7	2844.9	#NULL!	#NULL!	2923.9	2888.7	#NULL!	#NULL!	#NULL!	#NULL!	501	501	1	1	2	8	8	8	2	8	1	8	1	1	1	1	1	1	2	1	1	1	1	0	0	2
A940968502	A940968	2010	1	1	2	A940	2	44	#NULL!	2	2	3	7	2655.7	3653.8	4650.4	7691.48	3643.34	3403.66	10389.4	4325.12	12390.5	10756.4	501	501	1	2	8	1	3	2	2	8	1	8	2	8	2	8	8	8	8	1	1	1	1	0	0	2
A940968503	A940968	2010	1	1	2	A940	1	18	#NULL!	2	2	3	6	2655.7	3561.73	#NULL!	#NULL!	3862.34	5251.91	#NULL!	#NULL!	#NULL!	#NULL!	501	501	1	2	8	8	8	8	8	8	1	8	2	8	2	8	8	8	8	1	1	1	1	0	#NULL!	2
A940968901	A940968	2010	1	1	2	A940	1	32	#NULL!	4	4	4	1	2655.7	4972.84	#NULL!	#NULL!	#NULL!	#NULL!	#NULL!	#NULL!	#NULL!	#NULL!	501	501	1	2	8	8	8	8	2	8	1	8	2	8	2	8	8	8	8	1	1	1	1	0	0	1
A940968902	A940968	2010	1	1	2	A940	2	30	#NULL!	4	4	4	1	2655.7	3487.05	#NULL!	#NULL!	6296.6	5024.24	#NULL!	#NULL!	#NULL!	#NULL!	501	501	1	2	8	8	8	8	2	8	1	8	2	8	1	1	2	1	2	1	1	1	1	0	0	2
A940968903	A940968	2010	1	1	2	A940	1	2	28	4	4	1	#NULL!	2655.7	2592.67	#NULL!	#NULL!	2655.06	3339.17	#NULL!	#NULL!	#NULL!	#NULL!	501	501	1	8	8	8	8	8	8	8	8	8	8	8	8	8	8	8	8	8	8	8	8	#NULL!	#NULL!	8
A940969602	A940969	2010	1	1	2	A940	2	35	#NULL!	4	4	4	7	2655.7	5689.81	#NULL!	#NULL!	5847.79	3851.6	#NULL!	#NULL!	#NULL!	#NULL!	501	501	1	2	8	8	8	8	2	8	1	8	2	8	1	1	1	1	2	1	1	1	1	0	0	2
A940969603	A940969	2010	1	1	2	A940	2	4	59	4	4	1	#NULL!	2655.7	2383.39	#NULL!	#NULL!	2451.1	2628.11	#NULL!	#NULL!	#NULL!	#NULL!	501	501	1	1	1	8	8	8	8	8	8	8	8	8	8	8	8	8	8	8	8	8	8	#NULL!	#NULL!	8
A940969604	A940969	2010	1	1	2	A940	1	3	37	4	4	1	#NULL!	2655.7	2592.67	#NULL!	#NULL!	2655.06	2968.15	#NULL!	#NULL!	#NULL!	#NULL!	501	501	1	8	8	8	8	8	8	8	8	8	8	8	8	8	8	8	8	8	8	8	8	#NULL!	#NULL!	8
A940969901	A940969	2010	1	1	2	A940	1	34	#NULL!	3	3	4	2	2655.7	4972.84	#NULL!	13764.8	#NULL!	#NULL!	#NULL!	#NULL!	#NULL!	#NULL!	501	501	1	2	8	8	8	8	2	8	1	8	2	8	2	8	8	8	8	1	1	1	1	0	0	2
A940969902	A940969	2010	1	1	2	A940	2	33	#NULL!	2	3	4	7	2655.7	3487.05	#NULL!	#NULL!	6296.6	4186.87	#NULL!	#NULL!	#NULL!	#NULL!	501	501	1	2	8	8	8	8	2	8	1	8	2	8	2	8	8	8	8	1	1	1	1	0	0	2
A940969903	A940969	2010	1	1	2	A940	2	6	75	2	3	1	#NULL!	2655.7	1882.2	#NULL!	#NULL!	1909.38	2684.73	#NULL!	#NULL!	#NULL!	#NULL!	501	501	1	2	8	8	8	8	8	8	8	8	8	8	1	1	2	1	2	1	1	1	1	0	#NULL!	8
A940969904	A940969	2010	1	1	2	A940	2	4	56	2	3	#NULL!	#NULL!	2655.7	2383.39	#NULL!	#NULL!	2451.1	2463.85	#NULL!	#NULL!	#NULL!	#NULL!	501	501	1	2	8	8	8	8	8	8	8	8	8	8	8	8	8	8	8	8	8	8	8	#NULL!	#NULL!	8
A940969905	A940969	2010	1	1	2	A940	1	2	27	3	3	1	#NULL!	2655.7	2592.67	#NULL!	#NULL!	2655.06	2782.64	#NULL!	#NULL!	#NULL!	#NULL!	501	501	1	8	8	8	8	8	8	8	8	8	8	8	8	8	8	8	8	8	8	8	8	#NULL!	#NULL!	8
A940970401	A940970	2010	1	1	2	A940	1	40	#NULL!	3	3	4	2	2655.7	3931.9	4166.37	#NULL!	4138.94	5404.34	#NULL!	5266.16	#NULL!	#NULL!	501	501	1	2	8	2	8	8	2	8	1	8	2	8	2	8	8	8	8	1	1	1	1	0	0	2
A940970402	A940970	2010	1	1	2	A940	2	36	#NULL!	3	3	3	7	2655.7	2844.9	#NULL!	#NULL!	2923.9	2888.7	#NULL!	#NULL!	#NULL!	#NULL!	501	501	1	2	8	8	8	8	2	8	1	8	2	8	2	8	8	8	8	1	1	1	1	0	0	2
A940970403	A940970	2010	1	1	2	A940	1	10	#NULL!	3	3	1	#NULL!	2655.7	3103.97	#NULL!	#NULL!	2804.05	2631.1	#NULL!	#NULL!	#NULL!	#NULL!	501	501	1	1	2	8	8	8	8	8	8	8	8	8	1	1	1	1	2	1	1	1	1	0	#NULL!	8
A940970404	A940970	2010	1	1	2	A940	2	7	#NULL!	3	3	1	#NULL!	2655.7	1882.2	#NULL!	#NULL!	1909.38	2147.79	#NULL!	#NULL!	#NULL!	#NULL!	501	501	1	1	2	8	8	8	8	8	8	8	8	8	2	8	8	8	8	1	1	1	1	0	#NULL!	8
A940971001	A940971	2010	1	1	2	A940	2	68	#NULL!	3	2	2	7	2655.7	1386.51	1990.2	2730.73	1426.78	1526.55	4366.39	2062.11	2705.67	4465.7	501	501	1	2	8	2	8	8	2	8	1	8	2	8	2	8	8	8	8	1	1	1	1	0	0	2
A940971602	A940971	2010	1	1	2	A940	2	34	#NULL!	4	4	4	7	2655.7	6974.11	#NULL!	#NULL!	6296.6	4465.99	#NULL!	#NULL!	#NULL!	#NULL!	501	501	1	2	8	8	8	8	2	8	1	8	2	8	2	8	8	8	8	1	1	1	1	0	0	2
A940971603	A940971	2010	1	1	2	A940	1	5	69	4	4	1	#NULL!	2655.7	2083.29	#NULL!	#NULL!	2156.09	2832.94	#NULL!	#NULL!	#NULL!	#NULL!	501	501	1	2	8	8	8	8	8	8	8	8	8	8	8	8	8	8	8	8	8	8	8	#NULL!	#NULL!	8
A940971604	A940971	2010	1	1	2	A940	1	4	55	4	4	1	#NULL!	2655.7	2592.67	#NULL!	#NULL!	2655.06	2968.15	#NULL!	#NULL!	#NULL!	#NULL!	501	501	1	2	8	8	8	8	8	8	8	8	8	8	8	8	8	8	8	8	8	8	8	#NULL!	#NULL!	8
A940971901	A940971	2010	1	1	2	A940	1	38	#NULL!	4	4	4	2	2655.7	4086.57	#NULL!	#NULL!	#NULL!	#NULL!	#NULL!	#NULL!	#NULL!	#NULL!	501	501	1	1	2	8	8	8	2	8	1	8	2	8	1	1	2	1	2	1	2	1	1	0	0	1
A940971902	A940971	2010	1	1	2	A940	2	38	#NULL!	4	4	3	7	2655.7	2844.9	#NULL!	9822.78	#NULL!	#NULL!	#NULL!	#NULL!	#NULL!	#NULL!	501	501	1	2	8	8	8	8	2	8	1	8	1	1	2	8	8	8	8	1	1	1	1	0	0	2
A940971903	A940971	2010	1	1	2	A940	1	8	#NULL!	4	4	1	#NULL!	2655.7	2083.29	#NULL!	#NULL!	#NULL!	#NULL!	#NULL!	#NULL!	#NULL!	#NULL!	501	501	1	1	2	8	8	8	8	8	8	8	8	8	1	1	1	1	2	1	1	1	1	0	#NULL!	8
A940972201	A940972	2010	1	1	2	A940	1	58	#NULL!	4	4	4	2	2655.7	2804.88	3592.03	#NULL!	3151.93	2975.15	#NULL!	4029.33	#NULL!	#NULL!	501	501	1	2	8	2	8	8	2	8	1	8	2	8	2	8	8	8	8	1	1	1	1	0	0	2
A940972202	A940972	2010	1	1	2	A940	2	58	#NULL!	4	4	3	7	2655.7	2511.42	2070.81	6243.99	2403.39	1861.46	9446.25	2159.37	6606.6	10178	501	501	1	2	8	2	8	8	2	8	1	8	1	1	2	8	8	8	8	1	1	1	1	0	0	2
A940973303	A940973	2010	1	1	2	A940	2	8	#NULL!	4	4	1	#NULL!	2655.7	1882.2	#NULL!	#NULL!	1909.38	2863.72	#NULL!	#NULL!	#NULL!	#NULL!	501	501	1	2	8	8	8	8	8	8	8	8	8	8	2	8	8	8	8	1	1	1	1	0	#NULL!	8
A940973304	A940973	2010	1	1	2	A940	2	5	67	4	4	1	#NULL!	2655.7	1882.2	#NULL!	#NULL!	1909.38	2863.72	#NULL!	#NULL!	#NULL!	#NULL!	501	501	1	2	8	8	8	8	8	8	8	8	8	8	8	8	8	8	8	8	8	8	8	#NULL!	#NULL!	8
A940973701	A940973	2010	1	1	2	A940	1	45	#NULL!	3	4	4	1	2655.7	6280.42	5062.11	#NULL!	7542.09	6266.4	#NULL!	6709.06	#NULL!	#NULL!	501	501	1	2	8	1	2	2	2	8	1	8	2	8	2	8	8	8	8	1	1	1	1	0	0	2
A940973702	A940973	2010	1	1	2	A940	2	44	#NULL!	3	4	4	2	2655.7	3653.8	4650.4	#NULL!	3643.34	3403.66	#NULL!	4325.12	#NULL!	#NULL!	501	501	1	2	8	1	1	2	2	8	1	8	2	8	2	8	8	8	8	1	1	1	1	0	0	2
A940973703	A940973	2010	1	1	2	A940	1	15	#NULL!	3	4	1	7	2655.7	3561.73	#NULL!	#NULL!	3862.34	5251.91	#NULL!	#NULL!	#NULL!	#NULL!	501	501	1	2	8	8	8	8	8	8	1	8	2	8	2	8	8	8	8	1	1	1	1	0	#NULL!	2
A940973704	A940973	2010	1	1	2	A940	2	13	#NULL!	4	4	1	#NULL!	2655.7	2758.61	#NULL!	#NULL!	2713.25	2675.53	#NULL!	#NULL!	#NULL!	#NULL!	501	501	1	2	8	8	8	8	8	8	1	8	2	8	2	8	8	8	8	1	1	1	1	0	#NULL!	2
A940974501	A940974	2010	1	1	2	A940	1	40	#NULL!	2	3	4	1	2655.7	3931.9	4166.37	11393.4	4138.94	5404.34	16981.6	5266.16	27320.3	23596.5	501	501	1	1	1	1	1	2	1	2	1	8	2	8	1	1	1	1	2	1	1	1	1	0	1	2
A940974502	A940974	2010	1	1	2	A940	2	40	#NULL!	2	3	3	7	2655.7	3653.8	4650.4	#NULL!	3643.34	3403.66	#NULL!	4325.12	#NULL!	#NULL!	501	501	1	2	8	2	8	8	2	8	1	8	2	8	2	8	8	8	8	1	1	1	1	0	0	2
A940974503	A940974	2010	1	1	2	A940	2	14	#NULL!	2	3	1	#NULL!	2655.7	2758.61	#NULL!	#NULL!	2713.25	2675.53	#NULL!	#NULL!	#NULL!	#NULL!	501	501	1	2	8	8	8	8	8	8	1	8	2	8	2	8	8	8	8	1	1	1	1	0	#NULL!	1
A940974504	A940974	2010	1	1	2	A940	2	12	#NULL!	2	3	1	#NULL!	2655.7	2758.61	#NULL!	#NULL!	2713.25	2675.53	#NULL!	#NULL!	#NULL!	#NULL!	501	501	1	2	8	8	8	8	8	8	1	8	2	8	2	8	8	8	8	1	1	1	1	0	#NULL!	2
A940975301	A940975	2010	1	1	2	A940	1	37	#NULL!	4	4	4	5	2655.7	4086.57	#NULL!	#NULL!	#NULL!	#NULL!	#NULL!	#NULL!	#NULL!	#NULL!	501	501	1	1	2	8	8	8	2	8	1	8	2	8	1	2	1	1	2	1	1	1	1	0	0	1
A940975302	A940975	2010	1	1	2	A940	2	35	#NULL!	4	4	4	7	2655.7	2844.9	#NULL!	#NULL!	5847.79	3851.6	#NULL!	#NULL!	#NULL!	#NULL!	501	501	1	2	8	8	8	8	2	8	1	8	2	8	2	8	8	8	8	1	1	1	1	0	0	2
A940975303	A940975	2010	1	1	2	A940	2	7	#NULL!	4	4	1	#NULL!	2655.7	1882.2	#NULL!	#NULL!	1909.38	2863.72	#NULL!	#NULL!	#NULL!	#NULL!	501	501	1	2	8	8	8	8	8	8	8	8	8	8	1	1	2	1	1	1	1	1	1	0	#NULL!	8
A940975304	A940975	2010	1	1	2	A940	1	5	62	4	4	1	#NULL!	2655.7	2083.29	#NULL!	#NULL!	2156.09	2832.94	#NULL!	#NULL!	#NULL!	#NULL!	501	501	1	1	1	8	8	8	8	8	8	8	8	8	8	8	8	8	8	8	8	8	8	#NULL!	#NULL!	8
A940975702	A940975	2010	1	1	2	A940	2	39	#NULL!	4	4	4	1	2655.7	5689.81	#NULL!	#NULL!	2923.9	4333.05	#NULL!	#NULL!	#NULL!	#NULL!	501	501	1	2	8	8	8	8	2	8	1	8	2	8	2	8	8	8	8	1	1	1	1	0	0	2
A940975703	A940975	2010	1	1	2	A940	1	11	#NULL!	4	4	1	#NULL!	2655.7	3103.97	#NULL!	5754.9	2804.05	3946.65	#NULL!	#NULL!	9250.82	#NULL!	501	501	1	2	8	8	8	8	8	8	8	8	8	8	2	8	8	8	8	1	1	1	1	0	#NULL!	8
A940976601	A940976	2010	1	1	2	A940	1	40	#NULL!	4	4	4	3	2655.7	3931.9	4166.37	11393.4	#NULL!	#NULL!	8490.82	#NULL!	#NULL!	#NULL!	501	501	1	2	8	2	8	8	2	8	1	8	2	8	2	8	8	8	8	1	1	1	1	0	0	2
A940976602	A940976	2010	1	1	2	A940	2	35	#NULL!	4	4	4	1	2655.7	2844.9	#NULL!	#NULL!	5847.79	4333.05	#NULL!	#NULL!	#NULL!	#NULL!	501	501	1	2	8	8	8	8	2	8	1	8	2	8	2	8	8	8	8	1	1	1	1	0	0	2
A940976603	A940976	2010	1	1	2	A940	1	6	74	4	4	1	#NULL!	2655.7	2083.29	#NULL!	#NULL!	2156.09	3187.05	#NULL!	#NULL!	#NULL!	#NULL!	501	501	1	2	8	8	8	8	8	8	8	8	8	8	2	8	8	8	8	1	1	1	1	0	#NULL!	8
A940977702	A940977	2010	1	1	2	A940	2	39	#NULL!	3	3	3	7	2655.7	5689.81	#NULL!	9822.78	5847.79	4814.5	#NULL!	#NULL!	13452	#NULL!	501	501	1	1	2	8	8	8	2	8	1	8	2	8	1	2	1	1	2	1	1	1	1	0	0	2
A940977704	A940977	2010	1	1	2	A940	2	7	#NULL!	3	3	1	#NULL!	2655.7	2823.3	#NULL!	#NULL!	1909.38	3579.65	#NULL!	#NULL!	#NULL!	#NULL!	501	501	1	2	8	8	8	8	8	8	8	8	8	8	2	8	8	8	8	1	1	1	1	0	#NULL!	8
A940977705	A940977	2010	1	1	2	A940	2	3	46	4	3	1	#NULL!	2655.7	3575.08	#NULL!	#NULL!	2451.1	3285.13	#NULL!	#NULL!	#NULL!	#NULL!	501	501	1	8	8	8	8	8	8	8	8	8	8	8	8	8	8	8	8	8	8	8	8	#NULL!	#NULL!	8
A940979002	A940979	2010	1	1	2	A940	2	39	#NULL!	4	4	3	1	2655.7	5689.81	#NULL!	#NULL!	2923.9	3851.6	#NULL!	#NULL!	#NULL!	#NULL!	501	501	1	1	2	8	8	8	2	8	1	8	1	1	1	2	2	2	1	2	2	2	2	1	0	2
A940979003	A940979	2010	1	1	2	A940	2	13	#NULL!	4	4	1	#NULL!	2655.7	2758.61	#NULL!	9721.79	2713.25	3567.37	#NULL!	#NULL!	10985.8	#NULL!	501	501	1	2	8	8	8	8	8	8	1	8	2	8	2	8	8	8	8	1	1	1	1	0	#NULL!	2
A940979004	A940979	2010	1	1	2	A940	1	10	#NULL!	4	4	1	#NULL!	2655.7	3103.97	#NULL!	#NULL!	2804.05	3508.13	#NULL!	#NULL!	#NULL!	#NULL!	501	501	1	2	8	8	8	8	8	8	8	8	8	8	2	8	8	8	8	1	1	1	1	0	#NULL!	8
A940979702	A940979	2010	1	1	2	A940	2	34	#NULL!	4	4	4	7	2655.7	6974.11	#NULL!	#NULL!	6296.6	5024.24	#NULL!	#NULL!	#NULL!	#NULL!	501	501	1	2	8	8	8	8	2	8	1	8	2	8	2	8	8	8	8	1	1	1	1	0	0	2
A940979703	A940979	2010	1	1	2	A940	1	4	57	4	4	1	#NULL!	2655.7	2592.67	#NULL!	#NULL!	2655.06	3339.17	#NULL!	#NULL!	#NULL!	#NULL!	501	501	1	1	1	8	8	8	8	8	8	8	8	8	8	8	8	8	8	8	8	8	8	#NULL!	#NULL!	8
B901963001	B901963	2010	2	1	2	B901	1	32	#NULL!	4	4	4	2	6508.41	13036.2	#NULL!	#NULL!	11204.9	19092.9	#NULL!	#NULL!	#NULL!	#NULL!	502	502	1	2	8	8	8	8	2	8	1	8	1	1	2	8	8	8	8	1	1	1	1	0	0	2
B901963002	B901963	2010	2	1	2	B901	2	32	#NULL!	4	4	4	7	6508.41	8077.61	#NULL!	#NULL!	10537.9	9018.28	#NULL!	#NULL!	#NULL!	#NULL!	502	502	1	1	2	8	8	8	2	8	1	8	1	1	1	1	2	2	1	2	1	1	2	1	0	2
B901963003	B901963	2010	2	1	2	B901	2	1	20	4	4	1	#NULL!	6508.41	4113.3	#NULL!	#NULL!	4546.35	5306.99	#NULL!	#NULL!	#NULL!	#NULL!	502	502	1	8	8	8	8	8	8	8	8	8	8	8	8	8	8	8	8	8	8	8	8	#NULL!	#NULL!	8
B901963005	B901963	2010	2	1	2	B901	2	27	#NULL!	4	4	4	7	6508.41	7849.62	#NULL!	#NULL!	9056.06	11261.2	#NULL!	#NULL!	#NULL!	#NULL!	502	502	1	1	2	8	8	8	2	8	1	8	1	1	1	2	2	2	1	2	2	2	1	0	0	1
B901963701	B901963	2010	2	1	2	B901	1	61	#NULL!	2	2	2	7	6508.41	3971.93	11436.1	12761.4	4417.57	4370.26	23814.2	12453	14147	24477.3	502	502	1	2	8	2	8	8	2	8	2	3	1	1	2	8	8	8	8	1	1	1	1	0	0	2
B901963702	B901963	2010	2	1	2	B901	2	58	#NULL!	1	2	1	6	6508.41	6136.23	#NULL!	#NULL!	4429.2	4009.49	#NULL!	#NULL!	#NULL!	#NULL!	502	502	1	2	8	2	8	8	2	8	2	3	1	2	2	8	8	8	8	1	1	1	1	0	0	2
B901964302	B901964	2010	2	1	2	B901	2	35	#NULL!	1	2	3	7	6508.41	10143.9	#NULL!	#NULL!	5425.43	9333.15	#NULL!	#NULL!	#NULL!	#NULL!	502	502	1	2	8	8	8	8	2	8	1	8	2	8	2	8	8	8	8	1	1	1	1	0	0	2
B901964303	B901964	2010	2	1	2	B901	2	4	50	1	2	1	#NULL!	6508.41	4113.3	#NULL!	#NULL!	4546.35	6368.39	#NULL!	#NULL!	#NULL!	#NULL!	502	502	1	9	9	8	8	8	8	8	8	8	8	8	8	8	8	8	8	8	8	8	8	#NULL!	#NULL!	8
B901964901	B901964	2010	2	1	2	B901	1	37	#NULL!	4	4	4	1	6508.41	14050.7	#NULL!	#NULL!	#NULL!	#NULL!	#NULL!	#NULL!	#NULL!	#NULL!	502	502	1	2	8	8	8	8	2	8	1	8	2	8	2	8	8	8	8	1	2	1	1	0	0	2
B901964902	B901964	2010	2	1	2	B901	2	38	#NULL!	4	4	4	1	6508.41	5071.94	#NULL!	#NULL!	8138.14	8296.13	#NULL!	#NULL!	#NULL!	#NULL!	502	502	1	1	2	8	8	8	2	8	1	8	2	8	2	8	8	8	8	1	1	1	1	0	0	2
B901964903	B901964	2010	2	1	2	B901	2	4	52	4	4	1	#NULL!	6508.41	4113.3	#NULL!	#NULL!	4546.35	5660.79	#NULL!	#NULL!	#NULL!	#NULL!	502	502	1	9	9	8	8	8	8	8	8	8	8	8	8	8	8	8	8	8	8	8	8	#NULL!	#NULL!	8
B901964904	B901964	2010	2	1	2	B901	1	66	#NULL!	4	4	1	7	6508.41	3034.94	#NULL!	#NULL!	4243.42	4425.74	#NULL!	#NULL!	#NULL!	#NULL!	502	502	1	2	8	2	8	8	2	8	1	8	2	8	2	8	8	8	8	1	1	1	1	0	0	2
B901966102	B901966	2010	2	1	2	B901	2	21	#NULL!	1	2	3	7	6508.41	23687.5	#NULL!	15427.8	21222.2	15432.2	#NULL!	#NULL!	13990.9	#NULL!	502	502	1	1	2	8	8	8	2	8	1	8	1	1	1	1	2	1	2	2	1	1	1	0	0	2
B901966103	B901966	2010	2	1	2	B901	2	18	#NULL!	1	2	3	7	6508.41	15087.3	#NULL!	10473.4	12152.3	13688.7	#NULL!	#NULL!	11576.3	#NULL!	502	502	1	2	8	8	8	8	8	8	1	8	1	1	1	1	1	1	2	1	1	1	1	0	#NULL!	1
B901967402	B901967	2010	2	1	2	B901	2	31	#NULL!	2	2	4	7	6508.41	12116.4	#NULL!	26583.9	7903.44	10821.9	#NULL!	#NULL!	26437.4	#NULL!	502	502	1	2	8	8	8	8	2	8	1	8	2	8	2	8	8	8	8	1	1	1	1	0	0	2
B901967403	B901967	2010	2	1	2	B901	2	2	26	2	2	1	#NULL!	6508.41	4113.3	#NULL!	#NULL!	4546.35	6368.39	#NULL!	#NULL!	#NULL!	#NULL!	502	502	1	8	8	8	8	8	8	8	8	8	8	8	8	8	8	8	8	8	8	8	8	#NULL!	#NULL!	8
B901967901	B901967	2010	2	1	2	B901	1	49	#NULL!	3	3	4	1	6508.41	24655.8	10903.5	13577.9	19422.6	13497.5	16850.5	14450.9	16312.5	22286.9	502	502	1	2	8	2	8	8	2	8	1	8	2	8	2	8	8	8	8	1	1	1	1	0	0	2
B901969101	B901969	2010	2	1	2	B901	2	75	#NULL!	2	1	1	7	6508.41	3459.76	#NULL!	#NULL!	3160	4811.87	#NULL!	#NULL!	#NULL!	#NULL!	502	502	1	2	8	2	8	8	2	8	1	8	2	8	2	8	8	8	8	1	1	1	1	0	0	2
B901969102	B901969	2010	2	1	2	B901	2	72	#NULL!	2	1	1	7	6508.41	3088.53	12791.7	#NULL!	3643.55	3386	#NULL!	13775.2	#NULL!	#NULL!	502	502	1	1	1	2	8	8	2	8	1	8	1	1	1	2	1	1	2	2	1	1	1	0	0	2
B901969901	B901969	2010	2	1	2	B901	2	80	#NULL!	3	2	1	7	6508.41	3459.76	#NULL!	#NULL!	3160	4811.87	#NULL!	#NULL!	#NULL!	#NULL!	502	502	1	2	8	2	8	8	2	8	2	3	2	8	2	8	8	8	8	1	1	1	1	0	0	2
B901970702	B901970	2010	2	1	2	B901	2	53	#NULL!	2	3	3	3	6508.41	15767.4	11515.4	#NULL!	#NULL!	#NULL!	#NULL!	#NULL!	#NULL!	#NULL!	502	502	1	2	8	1	2	1	1	1	1	8	2	8	2	8	8	8	8	1	1	1	1	0	1	2
B901971302	B901971	2010	2	1	2	B901	2	77	#NULL!	3	2	2	7	6508.41	3459.76	#NULL!	#NULL!	3160	4811.87	#NULL!	#NULL!	#NULL!	#NULL!	502	502	1	1	9	2	8	8	2	8	2	3	1	1	1	2	1	1	2	1	2	1	1	0	0	2
B901972401	B901972	2010	2	1	2	B901	1	38	#NULL!	3	3	4	2	6508.41	15926.3	#NULL!	#NULL!	#NULL!	#NULL!	#NULL!	#NULL!	#NULL!	#NULL!	502	502	1	2	8	8	8	8	2	8	1	8	2	8	2	8	8	8	8	1	1	1	1	0	0	1
B901972405	B901972	2010	2	1	2	B901	1	67	#NULL!	4	3	3	7	6508.41	4046.59	#NULL!	#NULL!	3771.93	6638.62	#NULL!	#NULL!	#NULL!	#NULL!	502	502	1	2	8	2	8	8	2	8	1	8	1	1	2	8	8	8	8	1	1	1	1	0	0	2
B901972406	B901972	2010	2	1	2	B901	2	65	#NULL!	4	3	3	7	6508.41	4416.64	#NULL!	#NULL!	5160.18	6576.21	#NULL!	#NULL!	#NULL!	#NULL!	502	502	1	2	8	2	8	8	2	8	2	3	2	8	2	8	8	8	8	1	1	1	1	0	0	2
B901973102	B901973	2010	2	1	2	B901	2	65	#NULL!	3	2	3	7	6508.41	6624.97	#NULL!	11763.7	#NULL!	#NULL!	#NULL!	#NULL!	#NULL!	#NULL!	502	502	1	2	8	2	8	8	2	8	1	8	2	8	2	8	8	8	8	2	2	1	2	1	0	2
B901973401	B901973	2010	2	1	2	B901	1	55	#NULL!	2	2	1	5	6508.41	14324.7	#NULL!	#NULL!	#NULL!	#NULL!	#NULL!	#NULL!	#NULL!	#NULL!	502	502	1	2	8	2	8	8	1	1	1	8	2	8	2	8	8	8	8	2	1	1	1	0	1	2
B901973404	B901973	2010	2	1	2	B901	1	22	#NULL!	2	2	3	7	6508.41	25211.2	#NULL!	43571.4	20484.9	27356.3	#NULL!	#NULL!	63394.4	#NULL!	502	502	1	2	8	8	8	8	2	8	2	3	1	1	2	8	8	8	8	1	1	1	1	0	0	1
B901976201	B901976	2010	2	1	2	B901	2	52	#NULL!	1	2	2	3	6508.41	8759.46	5757.71	22115	9841.55	10381	16210.9	6025.54	24859.5	18355.2	502	502	1	2	8	2	8	8	2	8	1	8	2	8	2	8	8	8	8	1	1	1	1	0	0	2
B901977701	B901977	2010	2	1	2	B901	2	35	#NULL!	3	3	3	6	6508.41	5071.94	#NULL!	10578.9	5425.43	6222.1	#NULL!	#NULL!	9658.29	#NULL!	502	502	1	1	1	8	8	8	2	8	1	8	1	1	1	2	2	2	1	2	2	1	2	1	0	1
B901977702	B901977	2010	2	1	2	B901	1	35	#NULL!	3	3	3	1	6508.41	14050.7	#NULL!	10425.9	18831.1	11855.6	#NULL!	#NULL!	14074.4	#NULL!	502	502	1	2	8	8	8	8	2	8	1	8	2	8	2	8	8	8	8	1	1	1	1	0	0	2
B901977703	B901977	2010	2	1	2	B901	1	6	73	3	3	1	#NULL!	6508.41	6636.94	#NULL!	#NULL!	6637.87	4576.49	#NULL!	#NULL!	#NULL!	#NULL!	502	502	1	1	2	8	8	8	8	8	8	8	8	8	1	2	2	2	1	2	2	1	1	0	#NULL!	8
B901977704	B901977	2010	2	1	2	B901	2	2	34	3	3	1	#NULL!	6508.41	4113.3	#NULL!	#NULL!	4546.35	4245.59	#NULL!	#NULL!	#NULL!	#NULL!	502	502	1	8	8	8	8	8	8	8	8	8	8	8	8	8	8	8	8	8	8	8	8	#NULL!	#NULL!	8
B901978804	B901978	2010	2	1	2	B901	2	24	#NULL!	2	2	4	7	6508.41	23687.5	#NULL!	23141.8	#NULL!	#NULL!	#NULL!	#NULL!	#NULL!	#NULL!	502	502	1	2	8	8	8	8	2	8	1	8	1	1	2	8	8	8	8	1	1	1	1	0	0	1
B902966201	B902966	2010	2	1	1	B902	1	56	#NULL!	2	2	1	5	9794.39	16079.3	#NULL!	#NULL!	16908.9	14465.6	#NULL!	#NULL!	#NULL!	#NULL!	513	518	1	1	2	2	8	8	2	8	1	8	2	8	2	8	8	8	8	1	1	1	1	0	0	2
B902966202	B902966	2010	2	1	1	B902	2	52	#NULL!	2	2	2	7	9794.39	9886.46	17329.4	49920.7	11107.8	11716.6	48790.9	18135.4	56115.8	55244.7	513	518	1	2	8	1	2	1	2	8	1	8	1	3	2	8	8	8	8	1	1	1	1	0	0	2
B902967101	B902967	2010	2	1	1	B902	2	60	#NULL!	3	2	3	7	9794.39	7159.26	13210.7	#NULL!	5533.92	8345.01	#NULL!	13827.2	#NULL!	#NULL!	513	518	1	2	8	1	2	2	2	8	1	8	2	8	2	8	8	8	8	1	1	1	1	0	0	2
B902967103	B902967	2010	2	1	1	B902	1	30	#NULL!	2	2	3	3	9794.39	16318.1	#NULL!	55608.9	12646.5	19356	#NULL!	#NULL!	68003.4	#NULL!	513	518	1	2	8	8	8	8	2	8	2	3	2	8	2	8	8	8	8	1	1	1	1	0	0	2
B902967201	B902967	2010	2	1	1	B902	2	49	#NULL!	2	2	3	6	9794.39	13681.4	12557	31732.2	12350.1	9775.46	24954.5	13362.5	29343.7	27738.1	513	518	1	2	8	1	2	2	2	8	1	8	2	8	2	8	8	8	8	1	1	1	1	0	0	2
B902967203	B902967	2010	2	1	1	B902	2	37	#NULL!	2	2	3	2	9794.39	7632.66	#NULL!	#NULL!	8164.62	9363.52	#NULL!	#NULL!	#NULL!	#NULL!	513	518	1	2	8	8	8	8	2	8	1	8	2	8	2	8	8	8	8	1	1	1	1	0	0	2
B902967301	B902967	2010	2	1	1	B902	1	89	#NULL!	1	1	1	7	9794.39	11695	#NULL!	#NULL!	8530.93	8794.98	#NULL!	#NULL!	#NULL!	#NULL!	513	518	1	2	8	2	8	8	2	8	2	3	1	2	2	8	8	8	8	1	1	1	1	0	0	2
B902967302	B902967	2010	2	1	1	B902	2	81	#NULL!	1	1	1	7	9794.39	7809.8	#NULL!	#NULL!	4755.43	10861.9	#NULL!	#NULL!	#NULL!	#NULL!	513	518	1	2	8	2	8	8	2	8	1	8	2	8	2	8	8	8	8	1	1	1	1	0	0	2
B902967802	B902967	2010	2	1	1	B902	2	53	#NULL!	2	2	2	7	9794.39	9886.46	17329.4	#NULL!	9873.57	15622.2	#NULL!	18135.4	#NULL!	#NULL!	513	518	1	1	2	2	8	8	2	8	1	8	2	8	2	8	8	8	8	1	1	1	1	0	0	2
B902967803	B902967	2010	2	1	1	B902	2	29	#NULL!	1	2	3	7	9794.39	13289.3	#NULL!	33767	#NULL!	#NULL!	#NULL!	#NULL!	#NULL!	#NULL!	513	518	1	2	8	8	8	8	2	8	1	8	2	8	2	8	8	8	8	1	1	1	1	0	0	1
B902967804	B902967	2010	2	1	1	B902	1	15	#NULL!	2	2	2	7	9794.39	24526.8	#NULL!	#NULL!	21082	19141.2	#NULL!	#NULL!	#NULL!	#NULL!	513	518	1	2	8	8	8	8	8	8	1	8	2	8	2	8	8	8	8	1	1	1	1	0	#NULL!	2
B902968801	B902968	2010	2	1	1	B902	1	71	#NULL!	4	3	1	6	9794.39	7291.92	7562.89	#NULL!	8054.15	7088.22	#NULL!	7523.07	#NULL!	#NULL!	513	518	1	2	8	2	8	8	2	8	1	8	2	8	2	8	8	8	8	1	1	1	1	0	0	2
B902968802	B902968	2010	2	1	1	B902	2	59	#NULL!	3	3	1	6	9794.39	13851.4	6712.39	#NULL!	9998.13	9050.7	#NULL!	6999.45	#NULL!	#NULL!	513	518	1	2	8	2	8	8	2	8	1	8	1	1	2	8	8	8	8	1	1	1	1	0	0	2
B902969201	B902969	2010	2	1	1	B902	1	66	#NULL!	2	1	2	7	9794.39	4567.23	#NULL!	#NULL!	4257.23	4995.16	#NULL!	#NULL!	#NULL!	#NULL!	513	518	1	2	8	2	8	8	2	8	1	8	2	8	2	8	8	8	8	1	1	1	1	0	0	2
B902969202	B902969	2010	2	1	1	B902	2	59	#NULL!	1	1	1	7	9794.39	9234.29	13424.8	#NULL!	6665.42	6033.8	#NULL!	13998.9	#NULL!	#NULL!	513	518	1	2	8	2	8	8	2	8	1	8	2	8	2	8	8	8	8	1	1	1	1	0	0	2
B902969301	B902969	2010	2	1	1	B902	1	69	#NULL!	1	1	1	7	9794.39	4567.23	7013.91	19699.6	4257.23	4995.16	30759.4	7848.06	21490.7	35728.5	513	518	1	2	8	2	8	8	2	8	2	3	1	2	2	8	8	8	8	1	1	1	1	0	0	2
B902969302	B902969	2010	2	1	1	B902	2	60	#NULL!	1	1	1	7	9794.39	4772.84	6605.34	#NULL!	5533.92	5563.34	#NULL!	6913.59	#NULL!	#NULL!	513	518	1	2	8	2	8	8	2	8	1	8	1	2	2	8	8	8	8	1	1	1	1	0	0	2
B902969601	B902969	2010	2	1	1	B902	2	71	#NULL!	1	1	1	7	9794.39	4647.87	9625.02	#NULL!	5483.11	5095.53	#NULL!	10365	#NULL!	#NULL!	513	518	1	2	8	2	8	8	2	8	1	8	2	8	1	2	1	1	2	2	1	1	1	0	0	2
B902970102	B902970	2010	2	1	1	B902	2	47	#NULL!	2	3	4	1	9794.39	17336.5	#NULL!	31732.2	18338.9	18284.6	#NULL!	#NULL!	58687.4	#NULL!	513	518	1	2	8	2	8	8	2	8	1	8	2	8	2	8	8	8	8	1	1	1	1	0	0	2
B902970104	B902970	2010	2	1	1	B902	2	19	#NULL!	3	3	3	3	9794.39	19405.4	#NULL!	31522.5	#NULL!	#NULL!	#NULL!	#NULL!	#NULL!	#NULL!	513	518	1	2	8	8	8	8	2	8	1	8	2	8	1	1	1	1	1	1	1	1	1	0	0	1
B902970801	B902970	2010	2	1	1	B902	2	39	#NULL!	1	1	3	3	9794.39	7632.66	#NULL!	#NULL!	#NULL!	#NULL!	#NULL!	#NULL!	#NULL!	#NULL!	513	518	1	2	8	8	8	8	2	8	1	8	2	8	1	1	1	1	2	1	1	1	1	0	0	2
B902970802	B902970	2010	2	1	1	B902	1	15	#NULL!	1	1	1	7	9794.39	24526.8	#NULL!	#NULL!	#NULL!	#NULL!	#NULL!	#NULL!	#NULL!	#NULL!	513	518	1	2	8	8	8	8	8	8	1	8	2	8	2	8	8	8	8	1	1	1	1	0	#NULL!	1
B902970803	B902970	2010	2	1	1	B902	2	14	#NULL!	1	1	1	#NULL!	9794.39	17147.3	#NULL!	31512.5	#NULL!	#NULL!	#NULL!	#NULL!	#NULL!	#NULL!	513	518	1	2	8	8	8	8	8	8	1	8	2	8	2	8	8	8	8	1	1	1	1	0	#NULL!	1
B902971401	B902971	2010	2	1	1	B902	1	64	#NULL!	2	2	3	5	9794.39	5977.29	17210	#NULL!	6647.93	6576.73	#NULL!	18740.4	#NULL!	#NULL!	513	518	1	2	8	2	8	8	2	8	1	8	2	8	2	8	8	8	8	1	1	1	1	0	0	2
B902971402	B902971	2010	2	1	1	B902	2	61	#NULL!	3	2	1	7	9794.39	4772.84	#NULL!	28999.1	5533.92	5563.34	#NULL!	#NULL!	27994.9	#NULL!	513	518	1	2	8	2	8	8	2	8	2	3	1	2	1	2	1	1	2	2	1	1	1	0	0	2
B902971403	B902971	2010	2	1	1	B902	1	5	71	2	2	1	#NULL!	9794.39	9987.81	#NULL!	#NULL!	9989.2	6887.07	#NULL!	#NULL!	#NULL!	#NULL!	513	518	1	2	8	8	8	8	8	8	8	8	8	8	8	8	8	8	8	8	8	8	8	#NULL!	#NULL!	8
B902972501	B902972	2010	2	1	1	B902	1	74	#NULL!	4	2	4	7	9794.39	9722.56	#NULL!	#NULL!	5369.43	9450.96	#NULL!	#NULL!	#NULL!	#NULL!	513	518	1	1	2	2	8	8	2	8	1	8	2	8	1	1	1	1	2	1	1	1	1	0	0	2
B902975301	B902975	2010	2	1	1	B902	1	51	#NULL!	#NULL!	#NULL!	#NULL!	#NULL!	9794.39	16606.1	24053.4	55505.9	#NULL!	#NULL!	65614.7	#NULL!	#NULL!	#NULL!	513	518	1	2	8	2	8	8	2	8	1	8	2	8	2	8	8	8	8	1	1	1	1	0	0	2
B902975302	B902975	2010	2	1	1	B902	2	52	#NULL!	#NULL!	#NULL!	#NULL!	#NULL!	9794.39	6590.97	#NULL!	#NULL!	#NULL!	#NULL!	#NULL!	#NULL!	#NULL!	#NULL!	513	518	1	2	8	2	8	8	2	8	1	8	2	8	2	8	8	8	8	1	1	1	1	0	0	2
B902975303	B902975	2010	2	1	1	B902	1	27	#NULL!	#NULL!	#NULL!	3	5	9794.39	18298.1	#NULL!	#NULL!	#NULL!	#NULL!	#NULL!	#NULL!	#NULL!	#NULL!	513	518	1	2	8	8	8	8	2	8	1	8	2	8	2	8	8	8	8	1	1	1	1	0	0	2
B902975305	B902975	2010	2	1	1	B902	2	85	#NULL!	#NULL!	#NULL!	#NULL!	#NULL!	9794.39	5206.53	#NULL!	#NULL!	#NULL!	#NULL!	#NULL!	#NULL!	#NULL!	#NULL!	513	518	1	2	8	1	2	1	2	8	1	8	2	8	2	8	8	8	8	1	1	1	1	0	0	2
B902976401	B902976	2010	2	1	1	B902	1	67	#NULL!	2	1	1	6	9794.39	4567.23	#NULL!	#NULL!	4257.23	4995.16	#NULL!	#NULL!	#NULL!	#NULL!	513	518	1	2	8	2	8	8	2	8	1	8	2	8	2	8	8	8	8	1	1	1	1	0	0	2
B902976402	B902976	2010	2	1	1	B902	2	63	#NULL!	2	1	1	7	9794.39	4772.84	13210.7	#NULL!	5533.92	5563.34	#NULL!	13827.2	#NULL!	#NULL!	513	518	1	2	8	1	2	1	2	8	1	8	1	1	2	8	8	8	8	1	1	1	1	0	0	2
B902977201	B902977	2010	2	1	1	B902	1	69	#NULL!	2	2	1	3	9794.39	4567.23	#NULL!	#NULL!	5676.3	6660.22	#NULL!	#NULL!	#NULL!	#NULL!	513	518	1	2	8	2	8	8	2	8	2	3	2	8	1	2	1	1	2	2	1	1	1	0	0	2
B902977202	B902977	2010	2	1	1	B902	2	62	#NULL!	2	2	1	3	9794.39	4772.84	#NULL!	28999.1	7378.55	7417.79	#NULL!	#NULL!	55989.8	#NULL!	513	518	1	2	8	1	2	1	2	8	1	8	2	8	2	8	8	8	8	1	1	1	1	0	0	2
B902977203	B902977	2010	2	1	1	B902	2	39	#NULL!	1	2	4	2	9794.39	7632.66	#NULL!	#NULL!	10886.2	12484.7	#NULL!	#NULL!	#NULL!	#NULL!	513	518	1	2	8	8	8	8	2	8	1	8	2	8	2	8	8	8	8	1	1	1	1	0	0	2
B902977204	B902977	2010	2	1	1	B902	2	36	#NULL!	1	2	3	2	9794.39	7632.66	#NULL!	31839.8	#NULL!	#NULL!	#NULL!	#NULL!	#NULL!	#NULL!	513	518	1	2	8	8	8	8	2	8	1	8	2	8	1	1	1	1	2	1	1	1	1	0	0	1
B902978101	B902978	2010	2	1	1	B902	2	65	#NULL!	2	1	2	7	9794.39	4984.89	6451.1	#NULL!	5824.1	4948.21	#NULL!	6684.18	#NULL!	#NULL!	513	518	1	2	8	2	8	8	2	8	1	8	2	8	2	8	8	8	8	1	1	1	1	0	0	2
B902979204	B902979	2010	2	1	1	B902	2	73	#NULL!	4	2	1	7	9794.39	13943.6	#NULL!	#NULL!	6853.88	12738.8	#NULL!	#NULL!	#NULL!	#NULL!	513	518	1	2	8	2	8	8	2	8	1	8	2	8	2	8	8	8	8	1	1	1	1	0	0	2
B902979208	B902979	2010	2	1	1	B902	1	16	#NULL!	2	2	2	7	9794.39	24526.8	#NULL!	48429.3	21082	19141.2	#NULL!	#NULL!	61843.4	#NULL!	513	518	1	1	2	8	8	8	8	8	1	8	2	8	2	8	8	8	8	1	1	1	1	0	#NULL!	2
B903968601	B903968	2010	2	1	1	B903	1	75	#NULL!	2	1	1	7	6319.89	5295.64	#NULL!	#NULL!	5794.36	3982.47	#NULL!	#NULL!	#NULL!	#NULL!	513	518	1	2	8	1	2	2	2	8	2	3	2	8	1	2	1	1	2	1	1	1	1	0	0	2
B903969001	B903969	2010	2	1	1	B903	1	75	#NULL!	1	1	3	3	6319.89	5295.64	#NULL!	#NULL!	5794.36	3982.47	#NULL!	#NULL!	#NULL!	#NULL!	513	518	1	2	8	1	1	2	1	2	3	3	1	2	1	2	2	2	2	1	1	1	1	0	1	2
B903969002	B903969	2010	2	1	1	B903	2	71	#NULL!	1	1	1	5	6319.89	3156.91	#NULL!	#NULL!	3724.22	3460.97	#NULL!	#NULL!	#NULL!	#NULL!	513	518	1	2	8	1	3	1	2	8	1	8	1	1	2	8	8	8	8	1	1	1	1	0	0	2
B903969501	B903969	2010	2	1	1	B903	2	83	#NULL!	1	1	1	7	6319.89	3536.37	#NULL!	#NULL!	3229.97	4918.41	#NULL!	#NULL!	#NULL!	#NULL!	513	518	1	2	8	2	8	8	2	8	2	3	1	1	2	8	8	8	8	1	1	1	1	0	0	2
B903969901	B903969	2010	2	1	1	B903	2	80	#NULL!	1	1	1	7	6319.89	3536.37	#NULL!	#NULL!	3229.97	4918.41	#NULL!	#NULL!	#NULL!	#NULL!	513	518	1	2	8	1	1	1	1	2	2	3	2	8	1	2	2	2	2	2	1	1	1	0	1	2
B903970301	B903970	2010	2	1	1	B903	2	79	#NULL!	2	1	1	7	6319.89	3536.37	#NULL!	#NULL!	3229.97	4918.41	#NULL!	#NULL!	#NULL!	#NULL!	513	518	1	2	8	2	8	8	2	8	2	3	2	8	2	8	8	8	8	1	1	1	1	0	0	2
B903970801	B903970	2010	2	1	1	B903	1	61	#NULL!	1	1	3	7	6319.89	8119.76	11689.4	#NULL!	9030.77	8934.06	#NULL!	12728.8	#NULL!	#NULL!	513	518	1	2	8	2	8	8	2	8	2	3	1	2	2	8	8	8	8	1	1	1	1	0	0	2
B903971301	B903971	2010	2	1	1	B903	1	60	#NULL!	4	4	3	5	6319.89	4059.88	5844.68	#NULL!	#NULL!	#NULL!	#NULL!	#NULL!	#NULL!	#NULL!	513	518	1	2	8	2	8	8	2	8	1	8	1	1	2	8	8	8	8	1	1	1	1	0	0	2
B903971302	B903971	2010	2	1	1	B903	2	55	#NULL!	4	4	2	3	6319.89	6272.09	4559.17	10310.2	6790.9	6147.39	20797.2	9508.29	10909	22408.2	513	518	1	2	8	1	2	2	1	2	1	8	2	8	2	8	8	8	8	1	1	1	1	0	1	2
B903971303	B903971	2010	2	1	1	B903	2	26	#NULL!	4	4	4	1	6319.89	6017.57	#NULL!	11467.6	10413.6	13812.6	#NULL!	#NULL!	12826.3	#NULL!	513	518	1	1	2	8	8	8	2	8	1	8	1	1	1	1	1	2	2	1	1	1	1	0	0	1
B903971402	B903971	2010	2	1	1	B903	2	62	#NULL!	1	1	1	7	6319.89	6483.59	#NULL!	19696.7	3758.73	7557.44	#NULL!	#NULL!	19014.6	#NULL!	513	518	1	2	8	2	8	8	2	8	1	8	1	1	2	8	8	8	8	1	1	1	1	0	0	2
B903972201	B903972	2010	2	1	1	B903	1	76	#NULL!	1	1	1	7	6319.89	5295.64	#NULL!	#NULL!	#NULL!	#NULL!	#NULL!	#NULL!	#NULL!	#NULL!	513	518	1	2	8	1	2	2	1	2	3	3	1	2	2	8	8	8	8	1	1	1	1	0	1	2
B903972202	B903972	2010	2	1	1	B903	2	73	#NULL!	1	1	1	7	6319.89	3156.91	#NULL!	#NULL!	#NULL!	#NULL!	#NULL!	#NULL!	#NULL!	#NULL!	513	518	1	2	8	2	8	8	2	8	1	8	2	8	2	8	8	8	8	1	1	1	1	0	0	2
B903973601	B903973	2010	2	1	1	B903	1	69	#NULL!	1	1	2	7	6319.89	4653.21	#NULL!	#NULL!	4337.37	4523.74	#NULL!	#NULL!	#NULL!	#NULL!	513	518	1	2	8	2	8	8	2	8	1	8	2	8	2	8	8	8	8	1	1	1	1	0	0	2
B903973602	B903973	2010	2	1	1	B903	2	64	#NULL!	1	1	1	7	6319.89	4862.69	13459.4	#NULL!	5638.1	5038.29	#NULL!	14087.5	#NULL!	#NULL!	513	518	1	2	8	2	8	8	2	8	1	8	2	8	2	8	8	8	8	1	1	1	1	0	0	2
B903973603	B903973	2010	2	1	1	B903	1	9	#NULL!	1	1	1	#NULL!	6319.89	6783.89	#NULL!	#NULL!	6784.84	6237.09	#NULL!	#NULL!	#NULL!	#NULL!	513	518	1	2	8	8	8	8	8	8	8	8	8	8	2	8	8	8	8	1	1	1	1	0	#NULL!	8
B903974201	B903974	2010	2	1	1	B903	2	82	#NULL!	2	1	1	7	6319.89	3536.37	#NULL!	#NULL!	3229.97	4918.41	#NULL!	#NULL!	#NULL!	#NULL!	513	518	1	2	8	2	8	8	2	8	1	8	1	1	2	8	8	8	8	1	1	1	1	0	0	2
B903974901	B903974	2010	2	1	1	B903	1	71	#NULL!	3	2	1	6	6319.89	6603.73	#NULL!	#NULL!	3647.01	6419.25	#NULL!	#NULL!	#NULL!	#NULL!	513	518	1	2	8	2	8	8	2	8	1	8	2	8	2	8	8	8	8	1	1	1	1	0	0	2
B903975701	B903975	2010	2	1	1	B903	2	79	#NULL!	1	1	1	7	6319.89	3536.37	#NULL!	#NULL!	3229.97	4918.41	#NULL!	#NULL!	#NULL!	#NULL!	513	518	1	2	8	2	8	8	2	8	1	8	2	8	2	8	8	8	8	1	1	1	1	0	0	2
B903975901	B903975	2010	2	1	1	B903	1	64	#NULL!	2	2	3	6	6319.89	4059.88	5844.68	13044	4515.39	4467.03	24341.5	6364.39	14460.3	25019.3	513	518	1	2	8	1	2	1	2	8	2	3	1	1	2	8	8	8	8	1	1	1	1	0	0	2
B903975902	B903975	2010	2	1	1	B903	2	61	#NULL!	3	2	2	3	6319.89	3241.79	4486.46	#NULL!	3758.73	3778.72	#NULL!	4695.83	#NULL!	#NULL!	513	518	1	2	8	1	2	2	2	8	1	8	2	8	1	1	1	1	2	1	1	1	1	0	0	2
B903976601	B903976	2010	2	1	1	B903	2	83	#NULL!	1	1	1	7	6319.89	7072.73	#NULL!	#NULL!	3229.97	9836.82	#NULL!	#NULL!	#NULL!	#NULL!	513	518	1	2	8	2	8	8	2	8	1	8	2	8	2	8	8	8	8	1	1	1	1	0	0	2
B903977901	B903977	2010	2	1	1	B903	2	49	#NULL!	1	1	3	7	6319.89	9292.65	8528.95	10776.5	8388.41	18284.6	16949.5	9076.07	29896.1	18840.2	513	518	1	2	8	2	8	8	1	2	1	8	2	8	2	8	8	8	8	1	1	1	1	0	1	2
B903978601	B903978	2010	2	1	1	B903	1	64	#NULL!	3	3	2	7	6319.89	4059.88	5844.68	#NULL!	4515.39	4467.03	#NULL!	6364.39	#NULL!	#NULL!	513	518	1	2	8	2	8	8	2	8	1	8	2	8	2	8	8	8	8	1	1	1	1	0	0	2
B903978602	B903978	2010	2	1	1	B903	2	60	#NULL!	4	3	1	6	6319.89	3241.79	4486.46	#NULL!	3758.73	3778.72	#NULL!	4695.83	#NULL!	#NULL!	513	518	1	2	8	2	8	8	2	8	1	8	2	8	2	8	8	8	8	1	1	1	1	0	0	2
B903978603	B903978	2010	2	1	1	B903	1	32	#NULL!	3	3	3	5	6319.89	9993.64	#NULL!	45457.4	8589.73	15612.5	#NULL!	#NULL!	68003.4	#NULL!	513	518	1	2	8	8	8	8	1	1	1	8	2	8	2	8	8	8	8	1	1	1	1	0	1	1
B903978801	B903978	2010	2	1	1	B903	1	52	#NULL!	2	2	1	3	6319.89	13635.7	10529.8	12194.9	18297.6	18804.1	17464.7	13154.8	45584.9	22997.9	513	518	1	2	8	2	8	8	2	8	1	8	2	8	2	8	8	8	8	1	1	1	1	0	0	2
B903978802	B903978	2010	2	1	1	B903	1	18	#NULL!	2	2	2	7	6319.89	24526.8	#NULL!	32894	#NULL!	#NULL!	#NULL!	#NULL!	#NULL!	#NULL!	513	518	1	2	8	8	8	8	8	8	1	8	2	8	2	8	8	8	8	1	1	1	1	0	#NULL!	1
B904968201	B904968	2010	2	1	2	B904	1	43	#NULL!	2	3	3	1	3896.86	14007.9	9552.33	#NULL!	#NULL!	#NULL!	#NULL!	#NULL!	#NULL!	#NULL!	502	502	1	2	8	2	8	8	2	8	1	8	3	8	1	2	1	1	2	1	1	1	1	0	0	2
B904968203	B904968	2010	2	1	2	B904	2	6	83	2	3	1	#NULL!	3896.86	4489.57	#NULL!	#NULL!	4114.76	3693.21	#NULL!	#NULL!	#NULL!	#NULL!	502	502	1	1	9	8	8	8	8	8	8	8	8	8	1	1	2	2	1	1	1	1	1	0	#NULL!	8
B904968701	B904968	2010	2	1	2	B904	1	41	#NULL!	3	3	3	5	3896.86	14007.9	9552.33	#NULL!	13168.6	6195.33	#NULL!	12073.8	#NULL!	#NULL!	502	502	1	2	8	2	8	8	2	8	1	8	1	1	2	8	8	8	8	1	1	1	1	0	0	2
B904968702	B904968	2010	2	1	2	B904	2	40	#NULL!	3	3	3	3	3896.86	7001.78	#NULL!	17634.4	7950.06	3901.83	#NULL!	#NULL!	10653	#NULL!	502	502	1	9	9	2	8	8	2	8	1	8	2	8	2	8	8	8	8	1	1	1	1	0	0	2
B904968703	B904968	2010	2	1	2	B904	1	13	#NULL!	3	3	1	#NULL!	3896.86	9446.33	#NULL!	6597.2	5863.59	3016.19	#NULL!	#NULL!	5302.39	#NULL!	502	502	1	1	9	8	8	8	8	8	1	8	2	8	1	1	2	1	2	2	1	1	1	0	#NULL!	2
B904968704	B904968	2010	2	1	2	B904	2	9	#NULL!	3	3	1	#NULL!	3896.86	4489.57	#NULL!	#NULL!	4114.76	2462.14	#NULL!	#NULL!	#NULL!	#NULL!	502	502	1	2	8	8	8	8	8	8	8	8	8	8	2	8	8	8	8	1	1	1	1	0	#NULL!	8
B904969201	B904969	2010	2	1	2	B904	1	39	#NULL!	4	4	3	5	3896.86	7478.02	#NULL!	11097.7	13075.3	6309.74	#NULL!	#NULL!	14981.3	#NULL!	502	502	1	2	8	8	8	8	2	8	1	8	2	8	1	2	1	2	2	1	1	1	1	0	0	2
B904969202	B904969	2010	2	1	2	B904	2	35	#NULL!	4	4	3	7	3896.86	2699.36	#NULL!	#NULL!	2887.49	3311.5	#NULL!	#NULL!	#NULL!	#NULL!	502	502	1	2	8	8	8	8	2	8	1	8	2	8	2	8	8	8	8	1	1	1	1	0	0	2
B904969203	B904969	2010	2	1	2	B904	2	9	#NULL!	4	4	1	#NULL!	3896.86	4489.57	#NULL!	#NULL!	4114.76	2462.14	#NULL!	#NULL!	#NULL!	#NULL!	502	502	1	2	8	8	8	8	8	8	8	8	8	8	2	8	8	8	8	1	1	1	1	0	#NULL!	8
B904969204	B904969	2010	2	1	2	B904	2	5	70	4	4	1	#NULL!	3896.86	4489.57	#NULL!	#NULL!	4114.76	2462.14	#NULL!	#NULL!	#NULL!	#NULL!	502	502	1	2	8	8	8	8	8	8	8	8	8	8	8	8	8	8	8	8	8	8	8	#NULL!	#NULL!	8
B904969502	B904969	2010	2	1	2	B904	2	52	#NULL!	1	2	2	3	3896.86	3496.44	#NULL!	#NULL!	3928.37	4143.7	#NULL!	#NULL!	#NULL!	#NULL!	502	502	1	2	8	2	8	8	2	8	1	8	2	8	2	8	8	8	8	1	1	1	1	0	0	2
B904969503	B904969	2010	2	1	2	B904	2	26	#NULL!	1	2	3	1	3896.86	4699.9	#NULL!	11942	5422.24	7192.03	#NULL!	#NULL!	13356.9	#NULL!	502	502	1	1	9	8	8	8	1	1	1	8	2	8	1	1	2	1	1	1	1	1	1	0	1	2
B904970201	B904970	2010	2	1	2	B904	1	51	#NULL!	1	2	4	7	3896.86	7099.91	5482.71	#NULL!	6422.68	5759.64	#NULL!	6849.54	#NULL!	#NULL!	502	502	1	2	8	2	8	8	2	8	1	8	2	8	2	8	8	8	8	1	1	1	1	0	0	2
B904970202	B904970	2010	2	1	2	B904	2	49	#NULL!	1	2	3	7	3896.86	4838.56	4440.91	#NULL!	4367.73	3457.18	#NULL!	4725.79	#NULL!	#NULL!	502	502	1	2	8	2	8	8	2	8	1	8	2	8	2	8	8	8	8	1	1	1	1	0	0	2
B904970203	B904970	2010	2	1	2	B904	1	22	#NULL!	1	2	3	7	3896.86	16315.6	#NULL!	17392	9827.55	13896.4	#NULL!	#NULL!	25304.6	#NULL!	502	502	1	2	8	8	8	8	2	8	1	8	2	8	2	8	8	8	8	1	1	1	1	0	0	2
B904970402	B904970	2010	2	1	2	B904	2	30	#NULL!	1	1	3	3	3896.86	4299.03	#NULL!	14148.3	4206.33	4799.66	#NULL!	#NULL!	14070.4	#NULL!	502	502	1	2	8	8	8	8	2	8	1	8	2	8	2	8	8	8	8	1	1	1	1	0	0	2
B904970403	B904970	2010	2	1	2	B904	1	4	59	1	1	1	#NULL!	3896.86	3807.84	#NULL!	#NULL!	5737.28	3189.91	#NULL!	#NULL!	#NULL!	#NULL!	502	502	1	1	9	8	8	8	8	8	8	8	8	8	8	8	8	8	8	8	8	8	8	#NULL!	#NULL!	8
B904970404	B904970	2010	2	1	2	B904	1	73	#NULL!	2	1	1	7	3896.86	2292.32	#NULL!	#NULL!	1898.95	2089.01	#NULL!	#NULL!	#NULL!	#NULL!	502	502	1	2	8	2	8	8	2	8	2	3	1	1	2	8	8	8	8	1	1	1	1	0	0	2
B904970405	B904970	2010	2	1	2	B904	2	66	#NULL!	2	1	1	7	3896.86	2350.61	4562.98	6260.8	2059.75	2187.47	10010.9	4727.84	6203.35	10238.6	502	502	1	2	8	2	8	8	2	8	1	8	2	8	1	2	1	2	2	1	1	1	1	0	0	2
B904970801	B904970	2010	2	1	2	B904	1	61	#NULL!	2	2	3	6	3896.86	2113.92	3043.25	6791.82	2351.1	2325.92	12674.3	3313.85	7529.27	13027.2	502	502	1	2	8	2	8	8	1	1	1	8	2	8	1	2	1	1	2	1	1	1	1	0	1	2
B904970802	B904970	2010	2	1	2	B904	2	55	#NULL!	2	2	3	6	3896.86	3265.79	2373.9	#NULL!	2357.29	2133.91	#NULL!	2475.42	#NULL!	#NULL!	502	502	1	2	8	2	8	8	2	8	1	8	2	8	2	8	8	8	8	1	1	1	1	0	0	2
B904971002	B904971	2010	2	1	2	B904	2	33	#NULL!	2	2	4	7	3896.86	6448.54	#NULL!	#NULL!	4206.33	5119.64	#NULL!	#NULL!	#NULL!	#NULL!	502	502	1	1	9	8	8	8	2	8	1	8	1	1	1	1	2	2	1	1	1	1	1	0	0	2
B904971003	B904971	2010	2	1	2	B904	2	5	60	2	2	1	#NULL!	3896.86	4489.57	#NULL!	#NULL!	4114.76	3282.85	#NULL!	#NULL!	#NULL!	#NULL!	502	502	1	2	8	8	8	8	8	8	8	8	8	8	8	8	8	8	8	8	8	8	8	#NULL!	#NULL!	8
B904971004	B904971	2010	2	1	2	B904	1	1	13	2	2	1	#NULL!	3896.86	3807.84	#NULL!	#NULL!	5737.28	3402.57	#NULL!	#NULL!	#NULL!	#NULL!	502	502	1	8	8	8	8	8	8	8	8	8	8	8	8	8	8	8	8	8	8	8	8	#NULL!	#NULL!	8
B904973601	B904973	2010	2	1	2	B904	2	64	#NULL!	1	1	1	7	3896.86	1687.96	2336.04	#NULL!	1957.12	1967.53	#NULL!	2445.05	#NULL!	#NULL!	502	502	1	2	8	2	8	8	1	1	1	8	1	2	1	2	1	2	2	1	1	1	1	0	1	2
B904973702	B904973	2010	2	1	2	B904	2	74	#NULL!	3	2	1	7	3896.86	4931.28	#NULL!	#NULL!	2908.73	5406.25	#NULL!	#NULL!	#NULL!	#NULL!	502	502	1	2	8	2	8	8	2	8	1	8	2	8	1	2	1	2	2	1	2	1	1	0	0	2
B904974701	B904974	2010	2	1	2	B904	1	73	#NULL!	2	1	1	7	3896.86	1719.24	#NULL!	#NULL!	5696.85	5013.63	#NULL!	#NULL!	#NULL!	#NULL!	502	502	1	2	8	1	2	2	2	8	2	3	2	8	1	2	1	1	2	1	1	1	1	0	0	2
B904974702	B904974	2010	2	1	2	B904	2	69	#NULL!	2	1	1	3	3896.86	1762.95	4562.98	#NULL!	#NULL!	#NULL!	#NULL!	#NULL!	#NULL!	#NULL!	502	502	1	2	8	2	8	8	2	8	2	3	2	8	2	8	8	8	8	1	1	1	1	0	0	2
B904974703	B904974	2010	2	1	2	B904	1	39	#NULL!	1	1	4	7	3896.86	7478.02	#NULL!	#NULL!	#NULL!	#NULL!	#NULL!	#NULL!	#NULL!	#NULL!	502	502	1	2	8	8	8	8	2	8	1	8	1	1	2	8	8	8	8	1	1	1	1	0	0	2
B904976401	B904976	2010	2	1	2	B904	1	53	#NULL!	1	2	3	1	3896.86	7099.91	5482.71	9524.61	6422.68	7679.52	18187.2	6849.54	15823.6	23949.4	502	502	1	2	8	2	8	8	2	8	1	8	2	8	2	8	8	8	8	1	1	1	1	0	0	2
B904976402	B904976	2010	2	1	2	B904	2	49	#NULL!	1	2	3	5	3896.86	4838.56	4440.91	#NULL!	4367.73	4609.57	#NULL!	4725.79	#NULL!	#NULL!	502	502	1	1	9	2	8	8	2	8	1	8	2	8	1	1	1	2	2	1	1	1	1	0	0	2
B904976403	B904976	2010	2	1	2	B904	2	24	#NULL!	2	2	#NULL!	#NULL!	3896.86	10180.5	#NULL!	6158.2	15838	7300.66	#NULL!	#NULL!	9928.19	#NULL!	502	502	1	1	9	8	8	8	2	8	1	8	2	8	1	1	2	1	2	1	1	1	1	0	0	2
B904978101	B904978	2010	2	1	2	B904	2	75	#NULL!	3	2	1	7	3896.86	1841.34	#NULL!	#NULL!	1681.8	2560.95	#NULL!	#NULL!	#NULL!	#NULL!	502	502	1	2	8	1	2	2	2	8	1	8	2	8	2	8	8	8	8	1	1	1	2	1	0	2
B904978202	B904978	2010	2	1	2	B904	2	52	#NULL!	3	3	2	3	3896.86	3496.44	6128.69	8827.46	3928.37	4143.7	17255.4	6413.76	9922.94	19537.8	502	502	1	2	8	2	8	8	2	8	1	8	2	8	2	8	8	8	8	1	1	1	1	0	0	2
B904978203	B904978	2010	2	1	2	B904	1	29	#NULL!	3	3	4	3	3896.86	13064.7	#NULL!	7820.77	22318.9	13123	#NULL!	#NULL!	9631.27	#NULL!	502	502	1	1	9	8	8	8	2	8	1	8	2	8	2	8	8	8	8	1	1	1	1	0	0	2
B904979202	B904979	2010	2	1	2	B904	2	38	#NULL!	1	2	3	7	3896.86	5398.72	#NULL!	#NULL!	5774.99	6622.99	#NULL!	#NULL!	#NULL!	#NULL!	502	502	1	2	8	8	8	8	2	8	1	8	2	8	2	8	8	8	8	1	1	1	1	0	0	2
B904979204	B904979	2010	2	1	2	B904	1	9	#NULL!	2	2	1	#NULL!	3896.86	7064.56	#NULL!	#NULL!	3532.77	4871.35	#NULL!	#NULL!	#NULL!	#NULL!	502	502	1	2	8	8	8	8	8	8	8	8	8	8	2	8	8	8	8	1	1	1	1	0	#NULL!	8
B905968501	B905968	2010	2	1	2	B905	2	73	#NULL!	2	1	1	7	2771.1	1315.01	#NULL!	#NULL!	1551.32	1441.67	#NULL!	#NULL!	#NULL!	#NULL!	502	502	1	2	8	1	2	2	2	8	2	3	2	8	2	8	8	8	8	1	1	1	1	0	0	2
B905968601	B905968	2010	2	1	2	B905	1	68	#NULL!	1	1	1	7	2771.1	1292.19	#NULL!	#NULL!	#NULL!	#NULL!	#NULL!	#NULL!	#NULL!	#NULL!	502	502	1	2	8	1	2	2	2	8	2	3	1	1	2	8	8	8	8	1	1	1	1	0	0	2
B905968602	B905968	2010	2	1	2	B905	2	60	#NULL!	1	1	1	7	2771.1	1350.37	3737.66	#NULL!	4697.09	4722.07	#NULL!	3912.09	#NULL!	#NULL!	502	502	1	2	8	2	8	8	2	8	1	8	2	8	2	8	8	8	8	1	1	1	1	0	0	2
B905968603	B905968	2010	2	1	2	B905	1	33	#NULL!	1	1	3	7	2771.1	4162.84	#NULL!	#NULL!	#NULL!	#NULL!	#NULL!	#NULL!	#NULL!	#NULL!	502	502	1	2	8	8	8	8	2	8	1	8	2	8	1	1	1	1	2	1	1	1	1	0	0	2
B905969501	B905969	2010	2	1	2	B905	1	49	#NULL!	2	3	2	5	2771.1	14316.8	#NULL!	#NULL!	8502.88	5746.85	#NULL!	#NULL!	#NULL!	#NULL!	502	502	1	2	8	2	8	8	2	8	1	8	2	8	2	8	8	8	8	1	1	1	1	0	0	2
B905969502	B905969	2010	2	1	2	B905	2	46	#NULL!	2	3	3	5	2771.1	3870.85	7105.45	#NULL!	3494.18	2765.74	#NULL!	7561.26	#NULL!	#NULL!	502	502	1	2	8	2	8	8	2	8	1	8	2	8	2	8	8	8	8	1	1	1	1	0	0	2
B905969503	B905969	2010	2	1	2	B905	1	18	#NULL!	2	3	2	7	2771.1	9059.72	#NULL!	#NULL!	7888.49	4816.47	#NULL!	#NULL!	#NULL!	#NULL!	502	502	1	2	8	8	8	8	8	8	1	8	2	8	1	2	1	1	2	1	2	1	1	0	#NULL!	2
B905969801	B905969	2010	2	1	2	B905	2	50	#NULL!	1	2	2	6	2771.1	1864.77	#NULL!	#NULL!	2095.13	2209.97	#NULL!	#NULL!	#NULL!	#NULL!	502	502	1	2	8	1	1	2	2	8	1	8	2	8	2	8	8	8	8	1	1	1	1	0	0	2
B905969802	B905969	2010	2	1	2	B905	1	26	#NULL!	1	2	3	3	2771.1	6967.82	#NULL!	8342.15	18257.5	6998.92	#NULL!	#NULL!	10273.4	#NULL!	502	502	1	2	8	8	8	8	2	8	1	8	2	8	2	8	8	8	8	1	1	1	1	0	0	2
B905970501	B905970	2010	2	1	2	B905	1	36	#NULL!	1	2	4	1	2771.1	5982.42	#NULL!	#NULL!	#NULL!	#NULL!	#NULL!	#NULL!	#NULL!	#NULL!	502	502	1	2	8	8	8	8	2	8	1	8	2	8	2	8	8	8	8	1	1	1	1	0	0	2
B905970502	B905970	2010	2	1	2	B905	2	36	#NULL!	1	2	3	7	2771.1	2159.49	#NULL!	9008.36	4619.99	3532.26	#NULL!	#NULL!	8224.46	#NULL!	502	502	1	2	8	8	8	8	1	1	1	8	2	8	2	8	8	8	8	1	2	1	1	0	1	2
B905970503	B905970	2010	2	1	2	B905	1	7	#NULL!	2	2	1	#NULL!	2771.1	2825.83	#NULL!	#NULL!	2826.22	2598.05	#NULL!	#NULL!	#NULL!	#NULL!	502	502	1	2	8	8	8	8	8	8	8	8	8	8	2	8	8	8	8	1	1	1	1	0	#NULL!	8
B905970504	B905970	2010	2	1	2	B905	1	5	66	2	2	1	#NULL!	2771.1	2825.83	#NULL!	#NULL!	2826.22	2598.05	#NULL!	#NULL!	#NULL!	#NULL!	502	502	1	2	8	8	8	8	8	8	8	8	8	8	8	8	8	8	8	8	8	8	8	#NULL!	#NULL!	8
B905971001	B905971	2010	2	1	2	B905	1	38	#NULL!	1	2	3	5	2771.1	5982.42	#NULL!	8878.12	#NULL!	#NULL!	#NULL!	#NULL!	#NULL!	#NULL!	502	502	1	2	8	8	8	8	2	8	1	8	2	8	2	8	8	8	8	1	1	1	1	0	0	2
B905971002	B905971	2010	2	1	2	B905	2	34	#NULL!	1	2	3	7	2771.1	2579.42	#NULL!	#NULL!	6730.13	4095.71	#NULL!	#NULL!	#NULL!	#NULL!	502	502	1	2	8	8	8	8	2	8	1	8	2	8	1	2	1	1	2	1	2	1	1	0	0	2
B905971003	B905971	2010	2	1	2	B905	2	10	#NULL!	2	2	1	#NULL!	2771.1	4914.25	#NULL!	#NULL!	4221.26	3271.6	#NULL!	#NULL!	#NULL!	#NULL!	502	502	1	2	8	8	8	8	8	8	8	8	8	8	2	8	8	8	8	1	2	1	1	0	#NULL!	8
B905971004	B905971	2010	2	1	2	B905	1	7	#NULL!	2	2	1	#NULL!	2771.1	2825.83	#NULL!	#NULL!	2826.22	2598.05	#NULL!	#NULL!	#NULL!	#NULL!	502	502	1	2	8	8	8	8	8	8	8	8	8	8	2	8	8	8	8	1	1	1	1	0	#NULL!	8
B905971602	B905971	2010	2	1	2	B905	2	50	#NULL!	3	3	2	3	2771.1	3729.53	#NULL!	9415.96	4190.26	3314.96	#NULL!	#NULL!	15876.7	#NULL!	502	502	1	2	8	2	8	8	2	8	1	8	2	8	2	8	8	8	8	1	1	1	1	0	0	2
B905971603	B905971	2010	2	1	2	B905	2	10	#NULL!	3	3	1	#NULL!	2771.1	4914.25	#NULL!	#NULL!	4221.26	3680.55	#NULL!	#NULL!	#NULL!	#NULL!	502	502	1	2	8	8	8	8	8	8	8	8	8	8	2	8	8	8	8	1	1	1	1	0	#NULL!	8
B905972202	B905972	2010	2	1	2	B905	2	66	#NULL!	3	2	1	7	2771.1	1410.36	#NULL!	#NULL!	#NULL!	#NULL!	#NULL!	#NULL!	#NULL!	#NULL!	502	502	1	2	8	1	2	2	2	8	2	3	2	8	1	2	2	1	2	1	2	1	1	0	0	2
B905972801	B905972	2010	2	1	2	B905	2	68	#NULL!	2	1	1	7	2771.1	1410.36	1825.19	#NULL!	1647.8	1399.98	#NULL!	1891.14	#NULL!	#NULL!	502	502	1	2	8	2	8	8	2	8	1	8	2	8	1	1	1	1	2	1	1	1	1	0	0	2
B905973401	B905973	2010	2	1	2	B905	2	65	#NULL!	3	2	2	7	2771.1	1410.36	3650.38	#NULL!	1647.8	1399.98	#NULL!	3782.28	#NULL!	#NULL!	502	502	1	1	2	2	8	8	2	8	1	8	2	8	1	1	1	1	2	1	2	1	1	0	0	2
B905973402	B905973	2010	2	1	2	B905	1	66	#NULL!	2	2	2	7	2771.1	1292.19	#NULL!	#NULL!	1204.49	1413.27	#NULL!	#NULL!	#NULL!	#NULL!	502	502	1	2	8	2	8	8	2	8	1	8	2	8	2	8	8	8	8	1	1	1	1	0	0	2
B905974201	B905974	2010	2	1	2	B905	1	61	#NULL!	1	1	1	7	2771.1	1691.14	2434.6	5433.45	3761.76	5582.21	10139.4	5302.16	6023.42	10421.8	502	502	1	2	8	1	1	2	2	8	2	3	1	1	2	8	8	8	8	1	1	1	1	0	0	2
B905974202	B905974	2010	2	1	2	B905	2	53	#NULL!	1	1	1	7	2771.1	1864.77	2451.47	#NULL!	#NULL!	#NULL!	#NULL!	#NULL!	#NULL!	#NULL!	502	502	1	2	8	1	2	2	2	8	1	8	2	8	2	8	8	8	8	1	1	1	1	0	0	2
B905974203	B905974	2010	2	1	2	B905	1	1	23	1	1	1	#NULL!	2771.1	3046.27	#NULL!	#NULL!	#NULL!	#NULL!	#NULL!	#NULL!	#NULL!	#NULL!	502	502	1	8	8	8	8	8	8	8	8	8	8	8	8	8	8	8	8	8	8	8	8	#NULL!	#NULL!	8
B905974701	B905974	2010	2	1	2	B905	1	64	#NULL!	1	1	1	6	2771.1	2536.71	#NULL!	#NULL!	1880.88	2791.11	#NULL!	#NULL!	#NULL!	#NULL!	502	502	1	2	8	2	8	8	2	8	2	3	2	8	1	1	1	1	2	1	1	1	1	0	0	2
B905974702	B905974	2010	2	1	2	B905	2	61	#NULL!	1	1	1	7	2771.1	2025.55	#NULL!	12307	1565.7	2361.03	#NULL!	#NULL!	11880.8	#NULL!	502	502	1	2	8	1	2	2	1	1	2	3	2	8	2	8	8	8	8	1	1	1	1	0	1	2
B905976101	B905976	2010	2	1	2	B905	1	42	#NULL!	1	2	3	1	2771.1	11206.3	3820.93	5224.4	10534.9	4956.26	7786.84	4829.53	6263.79	10820.1	502	502	1	2	8	2	8	8	2	8	1	8	2	8	2	8	8	8	8	1	1	1	1	0	0	2
B905976102	B905976	2010	2	1	2	B905	2	36	#NULL!	1	2	4	1	2771.1	2159.49	#NULL!	4504.18	2310	2649.2	#NULL!	#NULL!	4112.23	#NULL!	502	502	1	2	8	8	8	8	2	8	1	8	2	8	2	8	8	8	8	1	1	1	1	0	0	2
B905976103	B905976	2010	2	1	2	B905	2	9	#NULL!	1	2	1	#NULL!	2771.1	3591.65	#NULL!	#NULL!	3291.81	1969.71	#NULL!	#NULL!	#NULL!	#NULL!	502	502	1	2	8	8	8	8	8	8	8	8	8	8	2	8	8	8	8	1	1	1	1	0	#NULL!	8
B905976104	B905976	2010	2	1	2	B905	2	6	80	1	2	1	#NULL!	2771.1	3591.65	#NULL!	#NULL!	3291.81	1969.71	#NULL!	#NULL!	#NULL!	#NULL!	502	502	1	2	8	8	8	8	8	8	8	8	8	8	2	8	8	8	8	1	1	1	1	0	#NULL!	8
B905976402	B905976	2010	2	1	2	B905	2	40	#NULL!	2	3	3	7	2771.1	5601.42	4264.83	#NULL!	6360.05	3121.46	#NULL!	3966.52	#NULL!	#NULL!	502	502	1	1	2	2	8	8	1	2	2	3	2	8	1	1	1	1	2	1	2	1	1	0	1	2
B905976403	B905976	2010	2	1	2	B905	2	16	#NULL!	3	3	2	7	2771.1	6423.73	#NULL!	4459.29	5174.13	3885.52	#NULL!	#NULL!	6571.83	#NULL!	502	502	1	2	8	8	8	8	8	8	1	8	2	8	2	8	8	8	8	1	1	1	1	0	#NULL!	2
B905976601	B905976	2010	2	1	2	B905	1	34	#NULL!	1	2	4	5	2771.1	4162.84	#NULL!	12623.5	#NULL!	#NULL!	#NULL!	#NULL!	#NULL!	#NULL!	502	502	1	2	8	8	8	8	2	8	2	3	2	8	1	1	1	1	2	1	1	1	1	0	0	1
B905976602	B905976	2010	2	1	2	B905	2	35	#NULL!	1	2	4	7	2771.1	2159.49	#NULL!	#NULL!	4619.99	5298.39	#NULL!	#NULL!	#NULL!	#NULL!	502	502	1	1	2	8	8	8	2	8	1	8	2	8	2	8	8	8	8	1	1	1	1	0	0	2
B905977502	B905977	2010	2	1	2	B905	2	43	#NULL!	1	1	3	7	2771.1	11202.8	#NULL!	14107.5	6360.05	12485.9	#NULL!	#NULL!	22726.3	#NULL!	502	502	1	2	8	2	8	8	2	8	1	8	2	8	2	8	8	8	8	1	1	1	1	0	0	2
B905979001	B905979	2010	2	1	2	B905	2	57	#NULL!	2	2	1	7	2771.1	2612.63	#NULL!	#NULL!	1885.83	1707.13	#NULL!	#NULL!	#NULL!	#NULL!	502	502	1	2	8	2	8	8	2	8	1	8	2	8	2	8	8	8	8	1	1	1	1	0	0	2
B905979002	B905979	2010	2	1	2	B905	2	28	#NULL!	1	2	4	2	2771.1	2506.61	#NULL!	9553.61	2891.86	3835.75	#NULL!	#NULL!	10685.5	#NULL!	502	502	1	2	8	8	8	8	2	8	1	8	2	8	2	8	8	8	8	1	1	1	1	0	0	2
B905979003	B905979	2010	2	1	2	B905	2	32	#NULL!	1	2	#NULL!	#NULL!	2771.1	2579.42	#NULL!	#NULL!	3365.07	3071.79	#NULL!	#NULL!	#NULL!	#NULL!	502	502	1	2	8	8	8	8	2	8	1	8	2	8	2	8	8	8	8	1	1	1	1	0	0	2
B905979004	B905979	2010	2	1	2	B905	2	2	31	1	2	1	#NULL!	2771.1	1751.33	#NULL!	#NULL!	1935.71	1807.65	#NULL!	#NULL!	#NULL!	#NULL!	502	502	1	8	8	8	8	8	8	8	8	8	8	8	8	8	8	8	8	8	8	8	8	#NULL!	#NULL!	8
B905979701	B905979	2010	2	1	2	B905	1	56	#NULL!	1	2	1	5	2771.1	3049.53	#NULL!	#NULL!	3794.43	2728.47	#NULL!	#NULL!	#NULL!	#NULL!	502	502	1	2	8	2	8	8	2	8	2	3	2	8	1	1	1	1	2	1	1	1	1	0	0	2
B905979702	B905979	2010	2	1	2	B905	2	61	#NULL!	2	2	1	7	2771.1	1350.37	3737.66	#NULL!	1565.7	1574.02	#NULL!	3912.09	#NULL!	#NULL!	502	502	1	1	2	2	8	8	2	8	1	8	2	8	2	8	8	8	8	1	1	1	1	0	0	2
B906968702	B906968	2010	2	1	1	B906	2	47	#NULL!	2	3	3	3	6543.06	15232.9	18641.4	17665.4	18338.9	18284.6	37045.8	19837.2	32671.3	41178.1	513	518	1	1	2	2	8	8	1	2	1	8	2	8	2	8	8	8	8	1	1	1	1	0	1	2
B906968703	B906968	2010	2	1	1	B906	2	24	#NULL!	2	3	4	3	6543.06	23687.5	#NULL!	12925	#NULL!	#NULL!	#NULL!	#NULL!	#NULL!	#NULL!	513	518	1	2	8	8	8	8	2	8	1	8	2	8	2	8	8	8	8	1	1	1	1	0	0	1
B906969001	B906969	2010	2	1	1	B906	1	55	#NULL!	2	2	2	5	6543.06	8000.52	8642.46	#NULL!	14932.2	10737.3	#NULL!	9694.6	#NULL!	#NULL!	513	518	1	2	8	2	8	8	2	8	1	8	2	8	2	8	8	8	8	1	1	1	1	0	0	2
B906969002	B906969	2010	2	1	1	B906	2	51	#NULL!	2	2	2	7	6543.06	4892.27	6431.51	#NULL!	8244.94	8696.89	#NULL!	6730.68	#NULL!	#NULL!	513	518	1	2	8	2	8	8	2	8	1	8	2	8	2	8	8	8	8	1	1	1	1	0	0	2
B906969003	B906969	2010	2	1	1	B906	1	25	#NULL!	2	2	3	7	6543.06	18280.3	#NULL!	32828.8	#NULL!	#NULL!	#NULL!	#NULL!	#NULL!	#NULL!	513	518	1	2	8	8	8	8	2	8	1	8	2	8	2	8	8	8	8	1	1	1	1	0	0	2
B906969101	B906969	2010	2	1	1	B906	1	56	#NULL!	1	2	2	5	6543.06	8000.52	#NULL!	#NULL!	9954.79	7158.23	#NULL!	#NULL!	#NULL!	#NULL!	513	518	1	2	8	1	2	2	2	8	1	8	1	2	1	1	1	1	2	1	1	1	1	0	0	2
B906969201	B906969	2010	2	1	1	B906	2	63	#NULL!	2	2	1	6	6543.06	3542.73	4902.93	#NULL!	#NULL!	#NULL!	#NULL!	#NULL!	#NULL!	#NULL!	513	518	1	2	8	2	8	8	2	8	2	3	1	1	2	8	8	8	8	1	2	1	1	0	0	2
B906969202	B906969	2010	2	1	1	B906	1	37	#NULL!	1	2	2	3	6543.06	15695	#NULL!	23292	#NULL!	#NULL!	#NULL!	#NULL!	#NULL!	#NULL!	513	518	1	2	8	8	8	8	2	8	1	8	2	8	2	8	8	8	8	1	1	1	1	0	0	2
B906969501	B906969	2010	2	1	1	B906	2	71	#NULL!	1	1	1	7	6543.06	3449.96	7144.34	#NULL!	8139.87	5673.38	#NULL!	7693.61	#NULL!	#NULL!	513	518	1	1	9	2	8	8	2	8	1	8	2	8	1	2	2	1	1	2	1	1	1	0	0	2
B906969502	B906969	2010	2	1	1	B906	2	7	#NULL!	1	1	1	#NULL!	6543.06	9422.8	#NULL!	#NULL!	8636.15	7751.39	#NULL!	#NULL!	#NULL!	#NULL!	513	518	1	1	9	8	8	8	8	8	8	8	8	8	1	1	1	1	2	1	1	1	1	0	#NULL!	8
B906969503	B906969	2010	2	1	1	B906	2	32	#NULL!	1	1	3	7	6543.06	6767.17	#NULL!	#NULL!	#NULL!	#NULL!	#NULL!	#NULL!	#NULL!	#NULL!	513	518	1	2	8	8	8	8	2	8	2	3	2	8	2	8	8	8	8	1	1	1	1	0	0	2
B906969901	B906969	2010	2	1	1	B906	1	56	#NULL!	1	2	3	5	6543.06	8000.52	8642.46	7150.23	9954.79	7158.23	11097.6	9694.6	7651.27	12753.1	513	518	1	2	8	2	8	8	2	8	1	8	2	8	2	8	8	8	8	1	1	1	1	0	0	2
B906969902	B906969	2010	2	1	1	B906	2	37	#NULL!	1	2	4	7	6543.06	5665.48	#NULL!	11816.8	6060.34	6950.24	#NULL!	#NULL!	10788.6	#NULL!	513	518	1	1	2	8	8	8	2	8	1	8	2	8	1	2	2	2	2	1	2	1	1	0	0	2
B906970401	B906970	2010	2	1	1	B906	2	67	#NULL!	3	2	1	7	6543.06	14800.5	9576.88	#NULL!	18005.2	16994.8	#NULL!	9922.91	#NULL!	#NULL!	513	518	1	2	8	1	2	2	2	8	1	8	2	8	2	8	8	8	8	1	1	1	1	0	0	2
B906971401	B906971	2010	2	1	1	B906	2	73	#NULL!	1	1	1	7	6543.06	3449.96	#NULL!	#NULL!	4069.93	3782.25	#NULL!	#NULL!	#NULL!	#NULL!	513	518	1	1	2	1	2	2	2	8	1	8	2	8	2	8	8	8	8	1	1	1	1	0	0	2
B906971901	B906971	2010	2	1	1	B906	1	61	#NULL!	3	3	2	5	6543.06	6655.13	12774.5	#NULL!	7401.81	7322.54	#NULL!	13910.4	#NULL!	#NULL!	513	518	1	2	8	2	8	8	2	8	1	8	2	8	2	8	8	8	8	1	1	1	1	0	0	2
B906971902	B906971	2010	2	1	1	B906	2	55	#NULL!	3	3	1	7	6543.06	10281.5	#NULL!	#NULL!	7421.29	6718.05	#NULL!	#NULL!	#NULL!	#NULL!	513	518	1	2	8	1	2	2	2	8	1	8	1	1	2	8	8	8	8	1	1	1	1	0	0	1
B906972201	B906972	2010	2	1	1	B906	2	68	#NULL!	2	1	1	7	6543.06	3700.13	#NULL!	13140.3	4323.04	3672.9	#NULL!	#NULL!	13019.7	#NULL!	513	518	1	2	8	1	2	1	2	8	2	3	1	1	2	8	8	8	8	1	1	1	1	0	0	2
B906972202	B906972	2010	2	1	1	B906	1	55	#NULL!	1	1	2	5	6543.06	8000.52	#NULL!	#NULL!	9954.79	7158.23	#NULL!	#NULL!	#NULL!	#NULL!	513	518	1	2	8	2	8	8	2	8	2	3	1	2	2	8	8	8	8	1	1	1	1	0	0	2
B906972801	B906972	2010	2	1	1	B906	1	53	#NULL!	2	3	3	5	6543.06	14901.5	11507.2	#NULL!	13480.1	12088.5	#NULL!	14376	#NULL!	#NULL!	513	518	1	2	8	2	8	8	2	8	1	8	2	8	1	2	2	2	2	2	1	1	1	0	0	2
B906973701	B906973	2010	2	1	1	B906	1	69	#NULL!	4	4	1	7	6543.06	10170.3	#NULL!	#NULL!	9480.01	11123.3	#NULL!	#NULL!	#NULL!	#NULL!	513	518	1	2	8	1	2	2	2	8	1	8	2	8	1	1	1	1	2	1	1	1	1	0	0	2
B906974201	B906974	2010	2	1	1	B906	2	66	#NULL!	4	3	1	6	6543.06	7400.26	#NULL!	#NULL!	8646.09	7345.79	#NULL!	#NULL!	#NULL!	#NULL!	513	518	1	2	8	2	8	8	2	8	1	8	2	8	2	8	8	8	8	1	1	1	1	0	0	2
B906975001	B906975	2010	2	1	1	B906	1	73	#NULL!	2	1	1	6	6543.06	3608.37	#NULL!	#NULL!	3985.56	3507.57	#NULL!	#NULL!	#NULL!	#NULL!	513	518	1	2	8	2	8	8	2	8	3	3	2	8	2	8	8	8	8	1	1	1	1	0	0	2
B906975901	B906975	2010	2	1	1	B906	1	45	#NULL!	1	2	3	6	6543.06	24655.8	12179.5	15166.8	19422.6	15077	18822.4	16142.1	18221.5	24895	513	518	1	2	8	2	8	8	2	8	1	8	2	8	2	8	8	8	8	1	1	1	1	0	0	2
B906976401	B906976	2010	2	1	1	B906	1	61	#NULL!	1	1	1	5	6543.06	6655.13	19161.7	21382.2	7401.81	7322.54	39901.6	20865.6	23703.9	41012.7	513	518	1	2	8	2	8	8	2	8	1	8	2	8	2	8	8	8	8	1	1	1	1	0	0	2
B906976403	B906976	2010	2	1	1	B906	2	81	#NULL!	3	1	1	7	6543.06	5796.96	#NULL!	#NULL!	5294.71	8062.47	#NULL!	#NULL!	#NULL!	#NULL!	513	518	1	2	8	1	3	2	2	8	2	3	1	2	2	8	8	8	8	1	1	1	1	0	0	2
B906977401	B906977	2010	2	1	1	B906	1	69	#NULL!	2	1	2	7	6543.06	3390.11	#NULL!	#NULL!	3160	3707.75	#NULL!	#NULL!	#NULL!	#NULL!	513	518	1	2	8	1	3	2	2	8	1	8	2	8	2	8	8	8	8	1	1	1	1	0	0	2
B906977402	B906977	2010	2	1	1	B906	2	66	#NULL!	2	1	1	7	6543.06	3700.13	9576.88	9855.23	4323.04	3672.9	21011.2	9922.91	9764.79	21489	513	518	1	2	8	1	2	2	2	8	2	3	2	8	2	8	8	8	8	1	1	1	1	0	0	2
B906977403	B906977	2010	2	1	1	B906	2	21	#NULL!	1	1	3	7	6543.06	21367	#NULL!	12925	21222.2	11492.1	#NULL!	#NULL!	15628.1	#NULL!	513	518	1	1	2	8	8	8	2	8	1	8	1	1	1	1	1	1	2	1	1	1	1	0	0	1
B906978202	B906978	2010	2	1	1	B906	2	58	#NULL!	3	3	1	7	6543.06	9139.09	#NULL!	#NULL!	16817.4	17061.2	#NULL!	#NULL!	#NULL!	#NULL!	513	518	1	2	8	2	8	8	2	8	2	3	2	8	2	8	8	8	8	1	1	1	1	0	0	2
B906978203	B906978	2010	2	1	1	B906	2	30	#NULL!	3	3	3	2	6543.06	9022.9	#NULL!	#NULL!	#NULL!	#NULL!	#NULL!	#NULL!	#NULL!	#NULL!	513	518	1	2	8	8	8	8	2	8	1	8	2	8	2	8	8	8	8	1	1	1	1	0	0	2
B906978204	B906978	2010	2	1	1	B906	2	27	#NULL!	2	3	3	3	6543.06	8768.23	#NULL!	#NULL!	#NULL!	#NULL!	#NULL!	#NULL!	#NULL!	#NULL!	513	518	1	2	8	8	8	8	2	8	1	8	2	8	2	8	8	8	8	1	1	1	1	0	0	2
B906978801	B906978	2010	2	1	1	B906	1	58	#NULL!	1	1	1	5	6543.06	12000.8	8642.46	#NULL!	9954.79	8947.79	#NULL!	9694.6	#NULL!	#NULL!	513	518	1	2	8	1	2	2	2	8	2	3	1	3	1	1	2	2	2	2	1	1	1	0	0	2
B906978802	B906978	2010	2	1	1	B906	2	54	#NULL!	1	1	2	1	6543.06	7338.4	6431.51	#NULL!	5496.63	7247.41	#NULL!	6730.68	#NULL!	#NULL!	513	518	1	1	2	2	8	8	1	2	2	3	2	8	1	1	1	1	2	1	1	1	1	0	1	2
B906978804	B906978	2010	2	1	1	B906	2	5	60	1	1	1	#NULL!	6543.06	9422.8	#NULL!	#NULL!	8636.15	6459.49	#NULL!	#NULL!	#NULL!	#NULL!	513	518	1	2	8	8	8	8	8	8	8	8	8	8	8	8	8	8	8	8	8	8	8	#NULL!	#NULL!	8
B906978805	B906978	2010	2	1	1	B906	1	2	35	1	1	1	#NULL!	6543.06	7991.98	#NULL!	#NULL!	12041.5	6695.05	#NULL!	#NULL!	#NULL!	#NULL!	513	518	1	8	8	8	8	8	8	8	8	8	8	8	8	8	8	8	8	8	8	8	8	#NULL!	#NULL!	8
B906979701	B906979	2010	2	1	1	B906	1	63	#NULL!	2	2	1	7	6543.06	4436.75	6387.23	7127.41	4934.54	4881.7	13300.5	6955.18	7901.31	13670.9	513	518	1	2	8	2	8	8	2	8	1	8	1	1	1	1	1	1	2	1	1	1	1	0	0	2
B906979702	B906979	2010	2	1	1	B906	2	59	#NULL!	2	2	1	7	6543.06	6854.32	4982.39	7511.54	4947.53	4478.7	11363.9	5195.46	7947.76	12244.1	513	518	1	2	8	2	8	8	2	8	1	8	2	8	2	8	8	8	8	1	1	1	1	0	0	2
B907970101	B907970	2010	2	1	2	B907	1	27	#NULL!	2	3	4	1	2426.88	5709.74	#NULL!	6835.93	14961	5735.23	#NULL!	#NULL!	8418.45	#NULL!	502	502	1	2	8	8	8	8	2	8	1	8	2	8	2	8	8	8	8	1	1	1	1	0	0	2
B907970102	B907970	2010	2	1	2	B907	2	27	#NULL!	2	3	4	7	2426.88	2054.03	#NULL!	#NULL!	2369.72	3143.18	#NULL!	#NULL!	#NULL!	#NULL!	502	502	1	2	8	8	8	8	2	8	1	8	2	8	2	8	8	8	8	1	1	1	1	0	0	2
B907970103	B907970	2010	2	1	2	B907	2	1	22	3	3	1	#NULL!	2426.88	1435.12	#NULL!	#NULL!	1586.21	1481.27	#NULL!	#NULL!	#NULL!	#NULL!	502	502	1	8	8	8	8	8	8	8	8	8	8	8	8	8	8	8	8	8	8	8	8	#NULL!	#NULL!	8
B907970202	B907970	2010	2	1	2	B907	2	34	#NULL!	3	3	4	7	2426.88	4227.38	#NULL!	#NULL!	2757.48	3775.74	#NULL!	#NULL!	#NULL!	#NULL!	502	502	1	2	8	8	8	8	1	2	1	8	2	8	2	8	8	8	8	1	1	1	1	0	1	2
B907970203	B907970	2010	2	1	2	B907	2	4	50	3	3	1	#NULL!	2426.88	1435.12	#NULL!	#NULL!	1586.21	2221.91	#NULL!	#NULL!	#NULL!	#NULL!	502	502	1	2	8	8	8	8	8	8	8	8	8	8	8	8	8	8	8	8	8	8	8	#NULL!	#NULL!	8
B907970801	B907970	2010	2	1	2	B907	1	41	#NULL!	3	4	4	2	2426.88	9182.98	3131.04	4281.1	8632.75	4061.38	6380.88	3957.54	5132.83	8866.43	502	502	1	2	8	2	8	8	2	8	1	8	1	2	1	2	2	2	1	2	2	1	2	1	0	2
B907971201	B907971	2010	2	1	2	B907	1	35	#NULL!	4	4	4	3	2426.88	4902.26	#NULL!	#NULL!	8571.59	4136.38	#NULL!	#NULL!	#NULL!	#NULL!	502	502	1	2	8	8	8	8	2	8	1	8	2	8	2	8	8	8	8	1	1	1	1	0	0	2
B907971202	B907971	2010	2	1	2	B907	2	33	#NULL!	4	4	3	1	2426.88	2113.69	#NULL!	#NULL!	2757.48	2517.16	#NULL!	#NULL!	#NULL!	#NULL!	502	502	1	2	8	8	8	8	2	8	1	8	2	8	2	8	8	8	8	1	1	1	1	0	0	2
B907971401	B907971	2010	2	1	2	B907	1	40	#NULL!	4	4	4	2	2426.88	9182.98	3131.04	#NULL!	8632.75	4061.38	#NULL!	3957.54	#NULL!	#NULL!	502	502	1	2	8	2	8	8	2	8	1	8	2	8	2	8	8	8	8	1	1	1	1	0	0	2
B907971402	B907971	2010	2	1	2	B907	2	32	#NULL!	4	4	4	2	2426.88	2113.69	#NULL!	#NULL!	2757.48	2517.16	#NULL!	#NULL!	#NULL!	#NULL!	502	502	1	1	1	8	8	8	2	8	1	8	2	8	1	1	2	2	2	1	1	1	1	0	0	2
B907971403	B907971	2010	2	1	2	B907	2	2	24	4	4	1	#NULL!	2426.88	1435.12	#NULL!	#NULL!	1586.21	1481.27	#NULL!	#NULL!	#NULL!	#NULL!	502	502	1	8	8	8	8	8	8	8	8	8	8	8	8	8	8	8	8	8	8	8	8	#NULL!	#NULL!	8
B907971901	B907971	2010	2	1	2	B907	1	37	#NULL!	3	3	4	2	2426.88	4902.26	#NULL!	#NULL!	8571.59	4136.38	#NULL!	#NULL!	#NULL!	#NULL!	502	502	1	2	8	8	8	8	2	8	1	8	2	8	2	8	8	8	8	1	1	1	1	0	0	2
B907971902	B907971	2010	2	1	2	B907	2	33	#NULL!	3	3	4	1	2426.88	2113.69	#NULL!	#NULL!	2757.48	2517.16	#NULL!	#NULL!	#NULL!	#NULL!	502	502	1	2	8	8	8	8	2	8	1	8	2	8	2	8	8	8	8	1	1	1	1	0	0	2
B907971903	B907971	2010	2	1	2	B907	1	1	15	3	3	1	#NULL!	2426.88	2496.25	#NULL!	#NULL!	3761.1	1672.93	#NULL!	#NULL!	#NULL!	#NULL!	502	502	1	8	8	8	8	8	8	8	8	8	8	8	8	8	8	8	8	8	8	8	8	#NULL!	#NULL!	8
B907973401	B907973	2010	2	1	2	B907	1	31	#NULL!	4	4	4	3	2426.88	3411.22	#NULL!	#NULL!	2932.01	5329.16	#NULL!	#NULL!	#NULL!	#NULL!	502	502	1	2	8	8	8	8	2	8	1	8	1	1	2	8	8	8	8	1	1	1	1	0	0	2
B907973402	B907973	2010	2	1	2	B907	2	30	#NULL!	4	4	4	2	2426.88	2113.69	#NULL!	#NULL!	2757.48	2517.16	#NULL!	#NULL!	#NULL!	#NULL!	502	502	1	2	8	8	8	8	2	8	2	3	1	2	2	8	8	8	8	1	1	1	1	0	0	2
B907973901	B907973	2010	2	1	2	B907	2	51	#NULL!	2	3	3	3	2426.88	1528.07	2008.85	#NULL!	#NULL!	#NULL!	#NULL!	#NULL!	#NULL!	#NULL!	502	502	1	2	8	2	8	8	2	8	1	8	2	8	2	8	8	8	8	1	1	1	1	0	0	2
B907973902	B907973	2010	2	1	2	B907	2	31	#NULL!	2	3	4	7	2426.88	2113.69	#NULL!	#NULL!	5514.97	5034.31	#NULL!	#NULL!	#NULL!	#NULL!	502	502	1	2	8	8	8	8	2	8	1	8	2	8	2	8	8	8	8	1	1	1	1	0	0	2
B907975001	B907975	2010	2	1	2	B907	1	49	#NULL!	2	3	4	5	2426.88	11731.8	7608.38	#NULL!	6967.64	4709.22	#NULL!	10083.8	#NULL!	#NULL!	502	502	1	2	8	2	8	8	2	8	1	8	2	8	2	8	8	8	8	1	1	1	1	0	0	2
B907975002	B907975	2010	2	1	2	B907	2	46	#NULL!	2	3	3	7	2426.88	3171.94	#NULL!	7356.91	2863.29	2266.37	#NULL!	#NULL!	6803.14	#NULL!	502	502	1	2	8	1	2	2	2	8	1	8	2	8	2	8	8	8	8	1	1	1	1	0	0	2
B907975003	B907975	2010	2	1	2	B907	1	20	#NULL!	2	3	3	6	2426.88	10695.8	#NULL!	#NULL!	6442.51	9109.85	#NULL!	#NULL!	#NULL!	#NULL!	502	502	1	2	8	8	8	8	2	8	1	8	1	1	2	8	8	8	8	1	1	1	1	0	0	2
B907975004	B907975	2010	2	1	2	B907	1	19	#NULL!	2	3	3	3	2426.88	7423.94	#NULL!	11228	6464.18	3946.83	#NULL!	#NULL!	8282.87	#NULL!	502	502	1	2	8	8	8	8	2	8	1	8	2	8	2	8	8	8	8	1	1	1	1	0	0	2
B907975902	B907975	2010	2	1	2	B907	2	25	#NULL!	3	4	4	7	2426.88	4108.06	#NULL!	#NULL!	2369.72	6286.36	#NULL!	#NULL!	#NULL!	#NULL!	502	502	1	2	8	8	8	8	2	8	1	8	2	8	2	8	8	8	8	1	1	1	1	0	0	2
B907976201	B907976	2010	2	1	2	B907	1	31	#NULL!	4	4	4	5	2426.88	3411.22	#NULL!	#NULL!	2932.01	5329.16	#NULL!	#NULL!	#NULL!	#NULL!	502	502	1	2	8	8	8	8	2	8	1	8	1	1	2	8	8	8	8	1	1	1	1	0	0	2
B907976202	B907976	2010	2	1	2	B907	2	32	#NULL!	4	4	4	3	2426.88	2113.69	#NULL!	#NULL!	2757.48	2517.16	#NULL!	#NULL!	#NULL!	#NULL!	502	502	1	1	2	8	8	8	2	8	1	8	2	8	2	8	8	8	8	1	1	1	1	0	0	2
B907976203	B907976	2010	2	1	2	B907	2	58	#NULL!	4	4	1	6	2426.88	2140.91	1556.22	7038.57	1545.33	1398.9	3549.44	1622.77	7447.32	3824.39	502	502	1	2	8	2	8	8	2	8	1	8	2	8	2	8	8	8	8	1	1	1	1	0	0	2
B907976801	B907976	2010	2	1	2	B907	1	30	#NULL!	3	3	4	5	2426.88	3411.22	#NULL!	#NULL!	2932.01	5329.16	#NULL!	#NULL!	#NULL!	#NULL!	502	502	1	2	8	8	8	8	2	8	2	3	1	2	2	8	8	8	8	1	2	1	1	0	0	2
B907976802	B907976	2010	2	1	2	B907	2	31	#NULL!	2	3	4	1	2426.88	2113.69	#NULL!	#NULL!	2757.48	2517.16	#NULL!	#NULL!	#NULL!	#NULL!	502	502	1	2	8	8	8	8	2	8	1	8	2	8	1	1	1	1	2	1	1	1	1	0	0	2
B907978101	B907978	2010	2	1	2	B907	1	34	#NULL!	1	2	3	5	2426.88	3411.22	#NULL!	10344.3	2932.01	5329.16	#NULL!	#NULL!	16102	#NULL!	502	502	1	2	8	8	8	8	2	8	1	8	2	8	1	1	1	1	2	1	1	1	1	0	0	2
B907978102	B907978	2010	2	1	2	B907	2	30	#NULL!	1	2	4	7	2426.88	2113.69	#NULL!	#NULL!	2757.48	2517.16	#NULL!	#NULL!	#NULL!	#NULL!	502	502	1	2	8	8	8	8	2	8	1	8	2	8	2	8	8	8	8	1	1	1	1	0	0	2
B907978602	B907978	2010	2	1	2	B907	2	25	#NULL!	2	3	4	2	2426.88	2054.03	#NULL!	#NULL!	2369.72	3143.18	#NULL!	#NULL!	#NULL!	#NULL!	502	502	1	2	8	8	8	8	2	8	1	8	2	8	2	8	8	8	8	1	1	1	1	0	0	1
B907979201	B907979	2010	2	1	2	B907	1	39	#NULL!	1	2	3	3	2426.88	4902.26	#NULL!	#NULL!	8571.59	4136.38	#NULL!	#NULL!	#NULL!	#NULL!	502	502	1	2	8	8	8	8	2	8	1	8	2	8	2	8	8	8	8	1	1	1	1	0	0	2
B907979202	B907979	2010	2	1	2	B907	2	38	#NULL!	1	2	3	2	2426.88	1769.58	#NULL!	7381.85	1892.91	2170.87	#NULL!	#NULL!	6739.49	#NULL!	502	502	1	1	2	8	8	8	2	8	1	8	1	2	2	8	8	8	8	1	1	1	1	0	0	2
B907979203	B907979	2010	2	1	2	B907	1	8	#NULL!	1	2	1	#NULL!	2426.88	2315.61	#NULL!	#NULL!	2315.93	1596.72	#NULL!	#NULL!	#NULL!	#NULL!	502	502	1	1	2	8	8	8	8	8	8	8	8	8	1	2	2	1	2	1	1	1	1	0	#NULL!	8
B907979502	B907979	2010	2	1	2	B907	2	51	#NULL!	3	4	3	3	2426.88	1528.07	2008.85	#NULL!	1716.84	1810.95	#NULL!	2102.29	#NULL!	#NULL!	502	502	1	1	2	2	8	8	2	8	1	8	2	8	2	8	8	8	8	1	1	1	1	0	0	2
B907979503	B907979	2010	2	1	2	B907	2	23	#NULL!	3	4	#NULL!	#NULL!	2426.88	6673.87	#NULL!	5382.72	10382.7	3589.49	#NULL!	#NULL!	6508.48	#NULL!	502	502	1	1	2	8	8	8	2	8	1	8	2	8	1	2	2	2	1	1	1	1	1	0	0	2
B908970201	B908970	2010	2	1	1	B908	1	64	#NULL!	3	3	4	3	9172.77	7856.75	15081	#NULL!	#NULL!	#NULL!	#NULL!	#NULL!	#NULL!	#NULL!	513	518	1	2	8	2	8	8	2	8	1	8	2	8	2	8	8	8	8	1	1	1	1	0	0	2
B908970202	B908970	2010	2	1	1	B908	2	58	#NULL!	3	3	3	7	9172.77	12137.9	#NULL!	#NULL!	16817.4	15862.1	#NULL!	#NULL!	#NULL!	#NULL!	513	518	1	2	8	2	8	8	2	8	1	8	2	8	2	8	8	8	8	1	1	1	1	0	0	2
B908971201	B908971	2010	2	1	1	B908	2	62	#NULL!	1	1	1	6	9172.77	4182.38	#NULL!	12705.8	4849.31	4875.09	#NULL!	#NULL!	12265.8	#NULL!	513	518	1	2	8	1	2	2	2	8	1	8	2	8	1	1	1	1	2	1	1	1	1	0	0	2
B908971401	B908971	2010	2	1	1	B908	2	74	#NULL!	2	1	#NULL!	#NULL!	9172.77	4072.87	#NULL!	#NULL!	4804.78	4465.16	#NULL!	#NULL!	#NULL!	#NULL!	513	518	1	2	8	1	2	1	1	2	3	3	2	8	1	1	2	2	2	2	1	1	2	1	1	2
B908972601	B908972	2010	2	1	1	B908	2	43	#NULL!	4	4	3	3	9172.77	16655.5	13209.1	54906.7	18343.5	12084.8	59020.6	12285.2	43992.8	61105.8	513	518	1	2	8	1	2	1	2	8	1	8	2	8	2	8	8	8	8	1	1	1	1	0	0	2
B908972602	B908972	2010	2	1	1	B908	1	45	#NULL!	4	4	3	3	9172.77	24655.8	14378.6	#NULL!	19422.6	20473.5	#NULL!	19056.6	#NULL!	#NULL!	513	518	1	2	8	2	8	8	2	8	1	8	2	8	2	8	8	8	8	1	1	1	1	0	0	2
B908972604	B908972	2010	2	1	1	B908	2	15	#NULL!	4	4	2	7	9172.77	19405.4	#NULL!	#NULL!	16025.4	15042.9	#NULL!	#NULL!	#NULL!	#NULL!	513	518	1	2	8	8	8	8	8	8	1	8	2	8	2	8	8	8	8	1	1	1	1	0	#NULL!	2
B908972605	B908972	2010	2	1	1	B908	1	11	#NULL!	4	4	1	#NULL!	9172.77	20385.2	#NULL!	32692.8	14528.7	9341.8	#NULL!	#NULL!	21896.9	#NULL!	513	518	1	2	8	8	8	8	8	8	8	8	8	8	1	2	1	1	2	1	1	1	1	0	#NULL!	8
B908973702	B908973	2010	2	1	1	B908	2	39	#NULL!	3	3	3	7	9172.77	13376.8	#NULL!	#NULL!	16914.2	17255.5	#NULL!	#NULL!	#NULL!	#NULL!	513	518	1	1	1	8	8	8	1	2	1	8	2	8	1	1	2	2	1	1	1	1	1	0	1	2
B908974501	B908974	2010	2	1	1	B908	1	47	#NULL!	2	3	3	6	9172.77	24655.8	14378.6	#NULL!	#NULL!	#NULL!	#NULL!	#NULL!	#NULL!	#NULL!	513	518	1	2	8	2	8	8	1	2	1	8	1	1	1	1	1	1	2	1	1	1	1	0	1	2
B908974502	B908974	2010	2	1	1	B908	2	39	#NULL!	3	3	3	2	9172.77	6688.42	#NULL!	27900.9	14309.1	16410.3	#NULL!	#NULL!	50946	#NULL!	513	518	1	2	8	8	8	8	2	8	1	8	2	8	1	1	2	2	2	1	1	1	1	0	0	2
B908974503	B908974	2010	2	1	1	B908	2	14	#NULL!	3	3	1	#NULL!	9172.77	15220.5	#NULL!	27614	#NULL!	#NULL!	#NULL!	#NULL!	#NULL!	#NULL!	513	518	1	2	8	8	8	8	8	8	1	8	1	1	1	1	1	1	2	1	1	1	1	0	#NULL!	1
B908974504	B908974	2010	2	1	1	B908	1	13	#NULL!	3	3	1	#NULL!	9172.77	20385.2	#NULL!	#NULL!	18204.4	14946.9	#NULL!	#NULL!	#NULL!	#NULL!	513	518	1	2	8	8	8	8	8	8	1	8	1	1	2	8	8	8	8	1	1	1	1	0	#NULL!	2
B908975001	B908975	2010	2	1	1	B908	1	60	#NULL!	4	4	1	7	9172.77	6983.78	7540.48	16828.6	7767.34	7684.15	31404	8210.98	18655.9	32278.5	513	518	1	2	8	2	8	8	1	2	1	8	1	2	2	8	8	8	8	1	1	1	1	0	1	2
B908975002	B908975	2010	2	1	1	B908	2	51	#NULL!	4	4	2	7	9172.77	7700.79	7592.76	#NULL!	8652.1	9126.37	#NULL!	7945.94	#NULL!	#NULL!	513	518	1	1	1	2	8	8	2	8	1	8	2	8	1	1	2	2	1	1	1	1	1	0	0	2
B908975004	B908975	2010	2	1	1	B908	2	25	#NULL!	4	4	3	5	9172.77	10351.4	#NULL!	19726.4	11942.3	15840.2	#NULL!	#NULL!	22063.6	#NULL!	513	518	1	2	8	8	8	8	2	8	1	8	2	8	2	8	8	8	8	1	1	1	1	0	0	1
B908975901	B908975	2010	2	1	1	B908	1	52	#NULL!	1	2	2	3	9172.77	16606.1	20377.4	39333.1	15914	17838.9	65614.7	25457.4	49009.2	78198.2	513	518	1	2	8	2	8	8	2	8	1	8	2	8	1	1	1	1	2	1	1	1	1	0	0	2
B908975902	B908975	2010	2	1	1	B908	2	51	#NULL!	1	2	3	3	9172.77	7219.49	11389.1	#NULL!	6489.07	8555.97	#NULL!	11918.9	#NULL!	#NULL!	513	518	1	1	9	2	8	8	2	8	1	8	2	8	1	1	2	2	2	1	1	1	1	0	0	3
B908975903	B908975	2010	2	1	1	B908	1	25	#NULL!	1	2	3	7	9172.77	18298.1	#NULL!	#NULL!	22318.9	21975.3	#NULL!	#NULL!	#NULL!	#NULL!	513	518	1	2	8	8	8	8	2	8	1	8	2	8	1	1	1	2	2	1	1	1	1	0	0	2
B908975904	B908975	2010	2	1	1	B908	1	22	#NULL!	2	2	3	7	9172.77	25211.2	#NULL!	35911.3	20484.9	27356.3	#NULL!	#NULL!	52249.3	#NULL!	513	518	1	1	9	8	8	8	2	8	1	8	2	8	1	1	2	1	1	1	1	1	1	0	0	1
B908976301	B908976	2010	2	1	1	B908	1	54	#NULL!	1	2	4	1	9172.77	16606.1	13584.9	#NULL!	15914	14271.1	#NULL!	16971.6	#NULL!	#NULL!	513	518	1	2	8	2	8	8	2	8	2	3	2	8	2	8	8	8	8	1	1	1	1	0	0	2
B908976302	B908976	2010	2	1	1	B908	2	53	#NULL!	1	2	3	3	9172.77	5775.59	7592.76	29163.3	6489.07	6844.78	42754.9	7945.94	32782.4	48410.3	513	518	1	2	8	2	8	8	2	8	1	8	2	8	2	8	8	8	8	1	1	1	2	1	0	2
B908976303	B908976	2010	2	1	1	B908	2	26	#NULL!	1	2	4	7	9172.77	7763.53	#NULL!	#NULL!	8956.74	11880.2	#NULL!	#NULL!	#NULL!	#NULL!	513	518	1	2	8	8	8	8	2	8	1	8	2	8	2	8	8	8	8	1	1	1	1	0	0	2
B908976304	B908976	2010	2	1	1	B908	1	24	#NULL!	2	2	3	3	9172.77	25211.2	#NULL!	28729	20484.9	27356.3	#NULL!	#NULL!	41799.4	#NULL!	513	518	1	1	9	8	8	8	2	8	1	8	2	8	1	1	1	1	2	1	1	1	1	0	0	2
B908976902	B908976	2010	2	1	1	B908	2	27	#NULL!	1	2	3	7	9172.77	15527.1	#NULL!	#NULL!	16525.7	18610.8	#NULL!	#NULL!	#NULL!	#NULL!	513	518	1	1	2	8	8	8	2	8	1	8	1	1	2	8	8	8	8	1	1	1	1	0	0	2
B908977301	B908977	2010	2	1	1	B908	2	39	#NULL!	3	3	3	1	9172.77	13376.8	#NULL!	#NULL!	9539.42	16410.3	#NULL!	#NULL!	#NULL!	#NULL!	513	518	1	1	2	8	8	8	1	1	1	8	2	8	2	8	8	8	8	1	1	1	1	0	1	2
B908977304	B908977	2010	2	1	1	B908	1	12	#NULL!	3	3	1	#NULL!	9172.77	20385.2	#NULL!	32692.8	18204.4	14946.9	#NULL!	#NULL!	35035	#NULL!	513	518	1	1	1	8	8	8	8	8	1	8	2	8	1	2	2	1	1	1	1	1	1	0	#NULL!	2
B908977801	B908977	2010	2	1	1	B908	2	63	#NULL!	1	1	2	7	9172.77	4182.38	5788.18	#NULL!	4849.31	4875.09	#NULL!	6058.3	#NULL!	#NULL!	513	518	1	2	8	1	2	2	1	2	1	8	2	8	2	8	8	8	8	1	1	1	1	0	1	2
B908977901	B908977	2010	2	1	1	B908	1	42	#NULL!	3	4	4	1	9172.77	17582.6	23086.4	32362.2	18108.4	15350.6	48235.1	26911.9	38800.7	67024.2	513	518	1	2	8	2	8	8	2	8	2	3	2	8	2	8	8	8	8	1	1	1	1	0	0	2
B908977902	B908977	2010	2	1	1	B908	1	8	#NULL!	4	4	1	#NULL!	9172.77	8752.21	#NULL!	#NULL!	8753.43	6035.06	#NULL!	#NULL!	#NULL!	#NULL!	513	518	1	2	8	8	8	8	8	8	8	8	8	8	2	8	8	8	8	1	1	1	1	0	#NULL!	8
B908977903	B908977	2010	2	1	1	B908	2	68	#NULL!	4	4	1	7	9172.77	4368.21	#NULL!	#NULL!	5103.59	4336.06	#NULL!	#NULL!	#NULL!	#NULL!	513	518	1	2	8	2	8	8	2	8	1	8	2	8	2	8	8	8	8	1	1	1	1	0	0	2
B908978401	B908978	2010	2	1	1	B908	1	65	#NULL!	4	3	4	7	9172.77	6003.32	12292.4	#NULL!	3730.56	6565.81	#NULL!	13754.3	#NULL!	#NULL!	513	518	1	2	8	2	8	8	2	8	1	8	1	1	2	8	8	8	8	1	2	1	1	0	0	2
B908978403	B908978	2010	2	1	1	B908	2	29	#NULL!	2	3	4	2	9172.77	11645.3	#NULL!	29589.6	8956.74	17820.2	#NULL!	#NULL!	33095.5	#NULL!	513	518	1	2	8	8	8	8	2	8	1	8	1	1	2	8	8	8	8	1	1	1	1	0	0	2
B908979302	B908979	2010	2	1	1	B908	1	33	#NULL!	3	3	4	2	9172.77	12893.2	#NULL!	19548.9	11082	19356	#NULL!	#NULL!	30430	#NULL!	513	518	1	2	8	8	8	8	2	8	1	8	2	8	2	8	8	8	8	1	1	1	1	0	0	2
B909972501	B909972	2010	2	1	1	B909	2	54	#NULL!	1	2	1	3	5408.79	2854.71	#NULL!	7207.29	6414.72	6766.35	#NULL!	#NULL!	16203.4	#NULL!	513	518	1	2	8	2	8	8	2	8	2	3	1	1	2	8	8	8	8	1	1	1	1	0	0	2
B909972502	B909972	2010	2	1	1	B909	1	27	#NULL!	1	2	4	7	5408.79	10666.8	#NULL!	6385.36	#NULL!	#NULL!	#NULL!	#NULL!	#NULL!	#NULL!	513	518	1	2	8	8	8	8	2	8	1	8	2	8	2	8	8	8	8	1	1	1	1	0	0	2
B909972902	B909972	2010	2	1	1	B909	2	50	#NULL!	2	2	1	3	5408.79	5709.42	7505.76	#NULL!	6414.72	6766.35	#NULL!	7854.89	#NULL!	#NULL!	513	518	1	2	8	1	2	2	2	8	1	8	2	8	2	8	8	8	8	1	1	1	1	0	0	2
B909973401	B909973	2010	2	1	1	B909	2	52	#NULL!	1	1	1	3	5408.79	2854.71	3752.88	#NULL!	6414.72	5074.76	#NULL!	7854.89	#NULL!	#NULL!	513	518	1	2	8	2	8	8	2	8	1	8	1	2	2	8	8	8	8	1	1	1	1	0	0	2
B909973402	B909973	2010	2	1	1	B909	1	57	#NULL!	1	1	3	1	5408.79	4668.42	5043	8344.52	#NULL!	#NULL!	12951.3	#NULL!	#NULL!	#NULL!	513	518	1	1	2	2	8	8	2	8	1	8	2	8	1	1	2	2	1	1	1	1	1	0	0	2
B909973403	B909973	2010	2	1	1	B909	2	5	69	1	1	1	#NULL!	5408.79	5498.34	#NULL!	#NULL!	5039.32	4523.05	#NULL!	#NULL!	#NULL!	#NULL!	513	518	1	2	8	8	8	8	8	8	8	8	8	8	8	8	8	8	8	8	8	8	8	#NULL!	#NULL!	8
B909973701	B909973	2010	2	1	1	B909	1	69	#NULL!	1	1	#NULL!	#NULL!	5408.79	1978.18	#NULL!	#NULL!	1843.91	2163.53	#NULL!	#NULL!	#NULL!	#NULL!	513	518	1	2	8	2	8	8	2	8	2	3	2	8	2	8	8	8	8	1	1	1	1	0	0	2
B909973702	B909973	2010	2	1	1	B909	2	64	#NULL!	1	1	1	7	5408.79	2067.23	5721.86	12560.2	2396.87	2409.62	22081.8	5988.88	12125.3	22283.2	513	518	1	2	8	1	2	2	2	8	1	8	2	8	2	8	8	8	8	1	1	1	1	0	0	2
B909973902	B909973	2010	2	1	1	B909	2	54	#NULL!	3	4	2	7	5408.79	5709.42	#NULL!	#NULL!	#NULL!	#NULL!	#NULL!	#NULL!	#NULL!	#NULL!	513	518	1	2	8	1	2	2	2	8	2	3	2	8	2	8	8	8	8	1	1	1	1	0	0	2
B909975302	B909975	2010	2	1	1	B909	2	56	#NULL!	2	2	3	7	5408.79	7999.19	5814.6	#NULL!	5773.91	5226.77	#NULL!	6063.26	#NULL!	#NULL!	513	518	1	2	8	1	2	2	2	8	1	8	2	8	1	1	2	1	2	1	1	1	1	0	0	2
B909978101	B909978	2010	2	1	1	B909	1	50	#NULL!	2	3	3	5	5408.79	13042.8	6714.64	23329.4	7865.81	14107.6	22273.8	8388.58	38758.1	29330.7	513	518	1	2	8	2	8	8	2	8	2	3	2	8	2	8	8	8	8	1	1	1	1	0	0	2
B909978102	B909978	2010	2	1	1	B909	2	44	#NULL!	3	3	3	6	5408.79	12862.5	6528.89	#NULL!	9736.38	9557.09	#NULL!	6072.21	#NULL!	#NULL!	513	518	1	2	8	2	8	8	2	8	1	8	2	8	2	8	8	8	8	1	1	1	1	0	0	2
B909978201	B909978	2010	2	1	1	B909	1	72	#NULL!	3	2	2	6	5408.79	2105.54	6551.34	#NULL!	2325.63	2046.72	#NULL!	6516.85	#NULL!	#NULL!	513	518	1	2	8	2	8	8	2	8	1	8	2	8	2	8	8	8	8	1	1	1	1	0	0	2
B909978202	B909978	2010	2	1	1	B909	2	66	#NULL!	3	2	1	7	5408.79	2159.08	#NULL!	7667.55	2522.56	2143.19	#NULL!	#NULL!	7597.2	#NULL!	513	518	1	2	8	1	2	2	2	8	2	3	2	8	2	8	8	8	8	1	1	1	1	0	0	2
B909978602	B909978	2010	2	1	1	B909	2	39	#NULL!	2	2	3	6	5408.79	6611.78	#NULL!	#NULL!	3536.29	5069.46	#NULL!	#NULL!	#NULL!	#NULL!	513	518	1	2	8	8	8	8	2	8	1	8	2	8	2	8	8	8	8	1	1	1	1	0	0	2
B909978603	B909978	2010	2	1	1	B909	2	1	22	2	2	1	#NULL!	5408.79	2681.05	#NULL!	#NULL!	2963.31	3459.1	#NULL!	#NULL!	#NULL!	#NULL!	513	518	1	8	8	8	8	8	8	8	8	8	8	8	8	8	8	8	8	8	8	8	8	#NULL!	#NULL!	8
B909978604	B909978	2010	2	1	1	B909	1	17	#NULL!	2	2	2	7	5408.79	13869.2	#NULL!	20975.9	12076.2	9216.71	#NULL!	#NULL!	30947.7	#NULL!	513	518	1	2	8	8	8	8	8	8	1	8	1	1	2	8	8	8	8	1	1	1	1	0	#NULL!	1
B909978605	B909978	2010	2	1	1	B909	2	18	#NULL!	2	2	3	7	5408.79	9833.88	#NULL!	#NULL!	7920.9	7435.27	#NULL!	#NULL!	#NULL!	#NULL!	513	518	1	2	8	8	8	8	8	8	1	8	2	8	1	1	1	1	1	1	1	1	1	0	#NULL!	1
B909978801	B909978	2010	2	1	1	B909	1	62	#NULL!	3	3	#NULL!	#NULL!	5408.79	2588.91	#NULL!	4158.95	2879.38	2848.54	#NULL!	#NULL!	4610.53	#NULL!	513	518	1	2	8	1	2	2	2	8	2	3	2	8	2	8	8	8	8	1	1	1	1	0	0	2
B909978802	B909978	2010	2	1	1	B909	2	33	#NULL!	2	3	4	1	5408.79	3948.74	#NULL!	8663.69	5151.47	4702.49	#NULL!	#NULL!	8615.95	#NULL!	513	518	1	2	8	8	8	8	2	8	1	8	2	8	2	8	8	8	8	1	1	1	1	0	0	2
B909979501	B909979	2010	2	1	1	B909	1	77	#NULL!	3	2	1	7	5408.79	3376.93	#NULL!	#NULL!	5542.43	3809.32	#NULL!	#NULL!	#NULL!	#NULL!	513	518	1	1	2	2	8	8	2	8	1	8	2	8	2	8	8	8	8	1	1	1	2	1	0	2
B909979502	B909979	2010	2	1	1	B909	2	69	#NULL!	3	2	1	7	5408.79	2159.08	#NULL!	#NULL!	3783.84	3214.78	#NULL!	#NULL!	#NULL!	#NULL!	513	518	1	2	8	1	2	2	2	8	1	8	2	8	2	8	8	8	8	1	1	1	1	0	0	2
B909979503	B909979	2010	2	1	1	B909	1	32	#NULL!	1	2	3	5	5408.79	6372.75	#NULL!	28987.4	#NULL!	#NULL!	#NULL!	#NULL!	#NULL!	#NULL!	513	518	1	1	2	8	8	8	1	1	1	8	2	8	1	2	2	2	2	1	1	1	1	0	1	2
B910966201	B910966	2010	2	1	2	B910	1	37	#NULL!	4	4	#NULL!	#NULL!	3716.54	7976.55	#NULL!	#NULL!	#NULL!	#NULL!	#NULL!	#NULL!	#NULL!	#NULL!	502	502	1	2	8	8	8	8	2	8	1	8	2	8	2	8	8	8	8	1	1	1	1	0	0	2
B910966202	B910966	2010	2	1	2	B910	2	33	#NULL!	4	4	4	1	3716.54	3439.22	#NULL!	#NULL!	6730.13	6826.19	#NULL!	#NULL!	#NULL!	#NULL!	502	502	1	2	8	8	8	8	1	2	1	8	1	1	1	1	1	2	2	1	1	1	1	0	1	2
B910966203	B910966	2010	2	1	2	B910	2	8	#NULL!	4	4	1	#NULL!	3716.54	9577.74	#NULL!	#NULL!	4389.08	4377.14	#NULL!	#NULL!	#NULL!	#NULL!	502	502	1	2	8	8	8	8	8	8	8	8	8	8	2	8	8	8	8	1	1	1	1	0	#NULL!	8
B910966205	B910966	2010	2	1	2	B910	2	58	#NULL!	4	4	3	7	3716.54	3483.51	2532.16	#NULL!	3771.66	3793.62	#NULL!	2640.45	#NULL!	#NULL!	502	502	1	2	8	2	8	8	2	8	1	8	2	8	2	8	8	8	8	1	1	1	1	0	0	2
B910966602	B910966	2010	2	1	2	B910	2	47	#NULL!	2	3	#NULL!	#NULL!	3716.54	10322.3	#NULL!	11970.6	18338.9	14750.6	#NULL!	#NULL!	22139	#NULL!	502	502	1	2	8	2	8	8	2	8	1	8	2	8	2	8	8	8	8	1	1	1	1	0	0	2
B910967101	B910967	2010	2	1	2	B910	1	36	#NULL!	3	3	4	2	3716.54	7976.55	#NULL!	11837.5	18831.1	8973.85	#NULL!	#NULL!	15980	#NULL!	502	502	1	2	8	8	8	8	2	8	1	8	2	8	1	1	1	1	2	1	1	1	1	0	0	1
B910967102	B910967	2010	2	1	2	B910	2	36	#NULL!	3	3	4	7	3716.54	2879.32	#NULL!	#NULL!	#NULL!	#NULL!	#NULL!	#NULL!	#NULL!	#NULL!	502	502	1	1	2	8	8	8	2	8	1	8	2	8	2	8	8	8	8	1	1	1	1	0	0	2
B910967103	B910967	2010	2	1	2	B910	1	8	#NULL!	3	3	1	#NULL!	3716.54	3767.77	#NULL!	#NULL!	3768.29	3464.07	#NULL!	#NULL!	#NULL!	#NULL!	502	502	1	2	8	8	8	8	8	8	8	8	8	8	2	8	8	8	8	1	1	1	1	0	#NULL!	8
B910967104	B910967	2010	2	1	2	B910	1	6	72	3	3	1	#NULL!	3716.54	3767.77	#NULL!	#NULL!	3768.29	3464.07	#NULL!	#NULL!	#NULL!	#NULL!	502	502	1	2	8	8	8	8	8	8	8	8	8	8	1	2	1	1	1	1	2	1	1	0	#NULL!	8
B910967701	B910967	2010	2	1	2	B910	1	42	#NULL!	3	4	4	2	3716.54	14941.8	5094.57	13931.7	14046.5	8260.44	10382.4	6439.38	33406.9	14426.7	502	502	1	2	8	2	8	8	2	8	1	8	2	8	2	8	8	8	8	1	1	1	1	0	0	1
B910967702	B910967	2010	2	1	2	B910	2	39	#NULL!	4	4	3	3	3716.54	2879.32	#NULL!	#NULL!	3079.99	4415.33	#NULL!	#NULL!	#NULL!	#NULL!	502	502	1	2	8	8	8	8	2	8	1	8	1	2	2	8	8	8	8	1	1	1	1	0	0	2
B910967704	B910967	2010	2	1	2	B910	2	11	#NULL!	4	4	1	#NULL!	3716.54	6552.33	#NULL!	#NULL!	5628.35	4089.5	#NULL!	#NULL!	#NULL!	#NULL!	502	502	1	2	8	8	8	8	8	8	8	8	8	8	2	8	8	8	8	1	1	1	1	0	#NULL!	8
B910967705	B910967	2010	2	1	2	B910	1	6	77	4	4	1	#NULL!	3716.54	3767.77	#NULL!	#NULL!	3768.29	3247.57	#NULL!	#NULL!	#NULL!	#NULL!	502	502	1	2	8	8	8	8	8	8	8	8	8	8	1	1	1	1	2	1	1	1	1	0	#NULL!	8
B910968202	B910968	2010	2	1	2	B910	2	31	#NULL!	1	2	3	7	3716.54	6878.44	#NULL!	15091.6	#NULL!	#NULL!	#NULL!	#NULL!	#NULL!	#NULL!	502	502	1	2	8	8	8	8	2	8	1	8	2	8	1	1	2	1	1	1	1	1	1	0	0	2
B910968204	B910968	2010	2	1	2	B910	1	2	26	2	2	1	#NULL!	3716.54	8123.39	#NULL!	#NULL!	#NULL!	#NULL!	#NULL!	#NULL!	#NULL!	#NULL!	502	502	1	8	8	8	8	8	8	8	8	8	8	8	8	8	8	8	8	8	8	8	8	#NULL!	#NULL!	8
B910968505	B910968	2010	2	1	2	B910	2	71	#NULL!	1	1	1	7	3716.54	7013.38	10892.7	#NULL!	#NULL!	#NULL!	#NULL!	#NULL!	#NULL!	#NULL!	502	502	1	2	8	1	3	2	2	8	1	8	2	8	1	2	1	1	2	1	1	1	2	1	0	2
B910969201	B910969	2010	2	1	2	B910	2	35	#NULL!	1	2	4	7	3716.54	2879.32	#NULL!	12011.1	3079.99	3532.26	#NULL!	#NULL!	10966	#NULL!	502	502	1	2	8	8	8	8	2	8	1	8	1	2	2	8	8	8	8	1	1	1	1	0	0	2
B910969202	B910969	2010	2	1	2	B910	1	9	#NULL!	2	2	1	#NULL!	3716.54	3767.77	#NULL!	#NULL!	3768.29	2598.05	#NULL!	#NULL!	#NULL!	#NULL!	502	502	1	2	8	8	8	8	8	8	8	8	8	8	2	8	8	8	8	1	1	1	1	0	#NULL!	8
B910969203	B910969	2010	2	1	2	B910	1	40	#NULL!	1	2	4	1	3716.54	14941.8	#NULL!	#NULL!	14046.5	6608.35	#NULL!	#NULL!	#NULL!	#NULL!	502	502	1	2	8	1	2	2	2	8	1	8	2	8	1	1	1	1	2	1	1	1	1	0	0	2
B910969204	B910969	2010	2	1	2	B910	2	3	39	2	2	1	#NULL!	3716.54	2335.11	#NULL!	#NULL!	2580.95	2410.21	#NULL!	#NULL!	#NULL!	#NULL!	502	502	1	8	8	8	8	8	8	8	8	8	8	8	8	8	8	8	8	8	8	8	8	#NULL!	#NULL!	8
B910971001	B910971	2010	2	1	2	B910	1	37	#NULL!	2	2	4	5	3716.54	7976.55	#NULL!	#NULL!	13947	6730.39	#NULL!	#NULL!	#NULL!	#NULL!	502	502	1	2	8	8	8	8	2	8	1	8	2	8	2	8	8	8	8	1	1	1	1	0	0	1
B910971002	B910971	2010	2	1	2	B910	2	10	#NULL!	2	2	1	#NULL!	3716.54	6552.33	#NULL!	#NULL!	5628.35	3271.6	#NULL!	#NULL!	#NULL!	#NULL!	502	502	1	2	8	8	8	8	8	8	8	8	8	8	1	1	2	1	2	1	1	1	1	0	#NULL!	8
B910971003	B910971	2010	2	1	2	B910	2	60	#NULL!	3	2	1	7	3716.54	1800.49	2491.77	#NULL!	2087.59	2098.7	#NULL!	2608.06	#NULL!	#NULL!	502	502	1	2	8	1	2	2	2	8	1	8	2	8	2	8	8	8	8	1	1	1	1	0	0	2
B910971901	B910971	2010	2	1	2	B910	1	53	#NULL!	4	4	4	1	3716.54	7573.24	11696.5	#NULL!	#NULL!	#NULL!	#NULL!	#NULL!	#NULL!	#NULL!	502	502	1	2	8	2	8	8	2	8	1	8	2	8	2	8	8	8	8	1	1	1	1	0	0	2
B910971902	B910971	2010	2	1	2	B910	2	50	#NULL!	4	4	4	7	3716.54	2486.36	6537.27	18831.9	3352.21	3535.96	36811.4	13682.7	21168.9	41680.6	502	502	1	1	2	2	8	8	2	8	1	8	2	8	1	1	1	1	2	1	1	1	1	0	0	2
B910971903	B910971	2010	2	1	2	B910	2	28	#NULL!	4	4	4	1	3716.54	3342.15	#NULL!	12738.1	4626.98	6137.2	#NULL!	#NULL!	14247.4	#NULL!	502	502	1	2	8	8	8	8	2	8	1	8	2	8	2	8	8	8	8	1	1	1	1	0	0	1
B910971904	B910971	2010	2	1	2	B910	2	25	#NULL!	4	4	4	1	3716.54	3342.15	#NULL!	#NULL!	4626.98	6137.2	#NULL!	#NULL!	#NULL!	#NULL!	502	502	1	1	2	8	8	8	2	8	1	8	2	8	1	2	1	2	1	1	1	1	1	0	0	2
[truncated: 6,314 more rows]
[truncated: 102 more columns]
