# Supplementary material for: The Effects of Earphone Use and Environmental Lead Exposure on Hearing Loss in the Korean Population: Data Analysis of the Korea National Health and Nutrition Examination Survey (KNHANES), 2010–2013
Source: PLoS One. 2016 Dec 28;11(12):e0168718. doi: 10.1371/journal.pone.0168718 (PMC5193416; doi:10.1371/journal.pone.0168718)
Supplement: S4 File — This data contains the information about audiometric measurement. (XLSX) [file pone.0168718.s005.xlsx]

## Sheet: HN11_ENT
ID	ID_fam	year	region	town_t	apt_t	psu	sex	age	age_month	incm	ho_incm	edu	occp	wt_hs	wt_itvex	wt_hm	wt_pft	wt_ex1	wt_ntr	wt_tot	wt_pfhm	wt_pfnt	wt_hmnt	wt_pfhmnt	wt_ex1nt	wt_ex1pf	wt_ex1hm	wt_ex1pfnt	wt_ex1hmnt	wt_tot1	wt_tot1nt	kstrata	kstrata0	T_ex	T_Q_ardg	T_Q_arpt	T_Q_DZ	T_Q_DZ1	T_Q_DZ2	T_Q_VC	T_Q_VC1	T_Q_HR	T_Q_HR1	T_Q_VN	T_Q_VN1	T_Q_CR	T_Q_CR1	T_Q_CR2	T_Q_CR3
A951929601	A9519296	2011	1	1	1	A951	2	56	#NULL!	3	3	3	1	7661.23	13586.1	31541.7	6059.91	#NULL!	6400.33	16006	14883.9	6101.93	31173.5	14905.9	#NULL!	#NULL!	#NULL!	#NULL!	#NULL!	#NULL!	#NULL!	512	517	1	2	8	2	8	8	2	8	1	8	2	8	2	8	8	8
A951930002	A9519300	2011	1	1	1	A951	2	70	#NULL!	2	1	1	7	7661.23	3981.01	107472	9195.15	#NULL!	3825	4179.59	163186	9594.89	113577	175129	#NULL!	#NULL!	#NULL!	#NULL!	#NULL!	#NULL!	#NULL!	512	517	1	2	8	2	8	8	2	8	1	8	2	8	2	8	8	8
A951930201	A9519302	2011	1	1	1	A951	1	42	#NULL!	4	4	3	5	7661.23	12597.4	30456.1	13977.6	#NULL!	13890.5	17499.9	41632.1	18282.1	33874.6	51274.7	#NULL!	#NULL!	#NULL!	#NULL!	#NULL!	#NULL!	#NULL!	512	517	1	2	8	2	8	8	2	8	1	8	1	1	1	1	1	1
A951930202	A9519302	2011	1	1	1	A951	2	42	#NULL!	4	4	4	7	7661.23	8003.44	#NULL!	11161	#NULL!	8445.84	8783.22	#NULL!	10742.2	#NULL!	#NULL!	#NULL!	#NULL!	#NULL!	#NULL!	#NULL!	#NULL!	#NULL!	512	517	1	2	8	1	2	2	2	8	1	8	1	1	2	8	8	8
A951930203	A9519302	2011	1	1	1	A951	1	7	#NULL!	4	4	1	#NULL!	7661.23	5304.16	#NULL!	#NULL!	#NULL!	4851.96	7103.54	#NULL!	#NULL!	#NULL!	#NULL!	#NULL!	#NULL!	#NULL!	#NULL!	#NULL!	#NULL!	#NULL!	512	517	1	2	8	8	8	8	8	8	8	8	8	8	2	8	8	8
A951930204	A9519302	2011	1	1	1	A951	2	5	66	4	4	1	#NULL!	7661.23	5033.76	#NULL!	#NULL!	#NULL!	5478.22	6894.54	#NULL!	#NULL!	#NULL!	#NULL!	#NULL!	#NULL!	#NULL!	#NULL!	#NULL!	#NULL!	#NULL!	512	517	1	2	8	8	8	8	8	8	8	8	8	8	8	8	8	8
A951930801	A9519308	2011	1	1	1	A951	2	47	#NULL!	3	4	4	7	7661.23	14768	#NULL!	#NULL!	#NULL!	13876.5	17096.8	#NULL!	#NULL!	#NULL!	#NULL!	#NULL!	#NULL!	#NULL!	#NULL!	#NULL!	#NULL!	#NULL!	512	517	1	2	8	1	2	2	2	8	1	8	2	8	2	8	8	8
A951931201	A9519312	2011	1	1	1	A951	2	36	#NULL!	2	3	3	3	7661.23	6453.66	#NULL!	#NULL!	#NULL!	6772.18	7926.74	#NULL!	#NULL!	#NULL!	#NULL!	#NULL!	#NULL!	#NULL!	#NULL!	#NULL!	#NULL!	#NULL!	512	517	1	2	8	8	8	8	2	8	1	8	2	8	2	8	8	8
A951931202	A9519312	2011	1	1	1	A951	1	5	71	2	3	1	#NULL!	7661.23	5304.16	#NULL!	#NULL!	#NULL!	4851.96	7103.54	#NULL!	#NULL!	#NULL!	#NULL!	#NULL!	#NULL!	#NULL!	#NULL!	#NULL!	#NULL!	#NULL!	512	517	1	2	8	8	8	8	8	8	8	8	8	8	8	8	8	8
A951932301	A9519323	2011	1	1	1	A951	2	63	#NULL!	1	1	1	6	7661.23	4709.7	#NULL!	5083.05	#NULL!	4975.89	4557.73	#NULL!	5312.64	#NULL!	#NULL!	#NULL!	#NULL!	#NULL!	#NULL!	#NULL!	#NULL!	#NULL!	512	517	1	2	8	1	2	2	2	8	2	3	1	2	1	1	1	1
A951932401	A9519324	2011	1	1	1	A951	1	84	#NULL!	2	1	1	7	7661.23	5399.75	#NULL!	#NULL!	#NULL!	5305.26	5752.72	#NULL!	#NULL!	#NULL!	#NULL!	#NULL!	#NULL!	#NULL!	#NULL!	#NULL!	#NULL!	#NULL!	512	517	1	2	8	2	8	8	2	8	1	8	2	8	2	8	8	8
A951932402	A9519324	2011	1	1	1	A951	2	85	#NULL!	2	1	1	7	7661.23	5600.15	#NULL!	#NULL!	#NULL!	5565.17	5572.79	#NULL!	#NULL!	#NULL!	#NULL!	#NULL!	#NULL!	#NULL!	#NULL!	#NULL!	#NULL!	#NULL!	512	517	1	2	8	2	8	8	2	8	2	3	1	2	2	8	8	8
A951932404	A9519324	2011	1	1	1	A951	1	19	#NULL!	1	1	3	3	7661.23	12483	#NULL!	#NULL!	#NULL!	13958.7	19798.1	#NULL!	#NULL!	#NULL!	#NULL!	#NULL!	#NULL!	#NULL!	#NULL!	#NULL!	#NULL!	#NULL!	512	517	1	2	8	8	8	8	2	8	1	8	2	8	1	1	2	1
A951932701	A9519327	2011	1	1	1	A951	1	40	#NULL!	1	2	#NULL!	#NULL!	7661.23	12597.4	#NULL!	24612.4	#NULL!	13890.5	17499.9	#NULL!	28010.8	#NULL!	#NULL!	#NULL!	#NULL!	#NULL!	#NULL!	#NULL!	#NULL!	#NULL!	512	517	1	2	8	2	8	8	2	8	1	8	2	8	2	8	8	8
A951932702	A9519327	2011	1	1	1	A951	2	43	#NULL!	1	2	3	7	7661.23	8003.44	#NULL!	#NULL!	#NULL!	8445.84	8783.22	#NULL!	#NULL!	#NULL!	#NULL!	#NULL!	#NULL!	#NULL!	#NULL!	#NULL!	#NULL!	#NULL!	512	517	1	2	8	2	8	8	2	8	1	8	1	2	2	8	8	8
A951932703	A9519327	2011	1	1	1	A951	1	6	77	1	2	1	#NULL!	7661.23	5304.16	#NULL!	#NULL!	#NULL!	4851.96	7103.54	#NULL!	#NULL!	#NULL!	#NULL!	#NULL!	#NULL!	#NULL!	#NULL!	#NULL!	#NULL!	#NULL!	512	517	1	2	8	8	8	8	8	8	8	8	8	8	2	8	8	8
A951932704	A9519327	2011	1	1	1	A951	1	80	#NULL!	3	2	1	7	7661.23	4049.82	#NULL!	#NULL!	#NULL!	3978.95	4314.54	#NULL!	#NULL!	#NULL!	#NULL!	#NULL!	#NULL!	#NULL!	#NULL!	#NULL!	#NULL!	#NULL!	512	517	1	2	8	2	8	8	2	8	1	8	2	8	2	8	8	8
A951932801	A9519328	2011	1	1	1	A951	2	65	#NULL!	3	2	1	7	7661.23	8896.31	#NULL!	10116.3	#NULL!	#NULL!	#NULL!	#NULL!	#NULL!	#NULL!	#NULL!	#NULL!	#NULL!	#NULL!	#NULL!	#NULL!	#NULL!	#NULL!	512	517	1	2	8	1	2	2	2	8	1	8	2	8	2	8	8	8
A951934101	A9519341	2011	1	1	1	A951	1	34	#NULL!	#NULL!	#NULL!	3	7	7661.23	9742.08	18212.1	#NULL!	#NULL!	10232	19737.5	#NULL!	#NULL!	23588.8	#NULL!	#NULL!	#NULL!	#NULL!	#NULL!	#NULL!	#NULL!	#NULL!	512	517	1	2	8	8	8	8	2	8	1	8	1	2	2	8	8	8
A951934102	A9519341	2011	1	1	1	A951	2	58	#NULL!	#NULL!	#NULL!	1	7	7661.23	4528.71	10513.9	6059.91	#NULL!	4266.89	5335.33	14883.9	6101.93	10391.2	14905.9	#NULL!	#NULL!	#NULL!	#NULL!	#NULL!	#NULL!	#NULL!	512	517	1	2	8	2	8	8	2	8	1	8	2	8	2	8	8	8
A951934902	A9519349	2011	1	1	1	A951	2	64	#NULL!	2	2	1	7	7661.23	9419.41	#NULL!	10166.1	#NULL!	9951.78	9115.46	#NULL!	10625.3	#NULL!	#NULL!	#NULL!	#NULL!	#NULL!	#NULL!	#NULL!	#NULL!	#NULL!	512	517	1	2	8	2	8	8	2	8	1	8	2	8	2	8	8	8
A951935201	A9519352	2011	1	1	1	A951	1	58	#NULL!	4	4	4	3	7661.23	10381.6	29962	8770.28	#NULL!	12215.2	12112.7	26752.7	10139.5	33090.4	29546.6	#NULL!	#NULL!	#NULL!	#NULL!	#NULL!	#NULL!	#NULL!	512	517	1	2	8	2	8	8	2	8	1	8	2	8	2	8	8	8
A951935202	A9519352	2011	1	1	1	A951	2	56	#NULL!	4	4	4	3	7661.23	6793.06	#NULL!	6059.91	#NULL!	6400.33	8003	#NULL!	6101.93	#NULL!	#NULL!	#NULL!	#NULL!	#NULL!	#NULL!	#NULL!	#NULL!	#NULL!	512	517	1	2	8	2	8	8	2	8	1	8	2	8	2	8	8	8
A951936001	A9519360	2011	1	1	1	A951	1	52	#NULL!	1	1	3	1	7661.23	9554.72	#NULL!	23005.6	#NULL!	#NULL!	#NULL!	#NULL!	#NULL!	#NULL!	#NULL!	#NULL!	#NULL!	#NULL!	#NULL!	#NULL!	#NULL!	#NULL!	512	517	1	2	8	2	8	8	2	8	2	3	2	8	2	8	8	8
A951936002	A9519360	2011	1	1	1	A951	2	48	#NULL!	1	1	2	6	7661.23	7384.01	20766.4	#NULL!	#NULL!	9251.03	11397.9	#NULL!	#NULL!	17984.5	#NULL!	#NULL!	#NULL!	#NULL!	#NULL!	#NULL!	#NULL!	#NULL!	512	517	1	2	8	2	8	8	2	8	1	8	2	8	2	8	8	8
A951936003	A9519360	2011	1	1	1	A951	1	22	#NULL!	1	1	3	3	7661.23	11936.6	20245.2	#NULL!	#NULL!	19024.9	23766.3	#NULL!	#NULL!	21152	#NULL!	#NULL!	#NULL!	#NULL!	#NULL!	#NULL!	#NULL!	#NULL!	512	517	1	2	8	8	8	8	2	8	1	8	2	8	2	8	8	8
A951936004	A9519360	2011	1	1	1	A951	1	14	#NULL!	1	1	1	#NULL!	7661.23	5282.99	16550	#NULL!	#NULL!	7229.3	11109.1	#NULL!	#NULL!	12433.5	#NULL!	#NULL!	#NULL!	#NULL!	#NULL!	#NULL!	#NULL!	#NULL!	512	517	1	2	8	8	8	8	8	8	1	8	2	8	2	8	8	8
A951936801	A9519368	2011	1	1	1	A951	1	37	#NULL!	3	3	4	1	7661.23	11219.9	#NULL!	#NULL!	#NULL!	11250.2	16452.6	#NULL!	#NULL!	#NULL!	#NULL!	#NULL!	#NULL!	#NULL!	#NULL!	#NULL!	#NULL!	#NULL!	512	517	1	2	8	8	8	8	2	8	1	8	2	8	2	8	8	8
A951936802	A9519368	2011	1	1	1	A951	2	35	#NULL!	3	3	4	7	7661.23	6453.66	31105.7	#NULL!	#NULL!	6772.18	7926.74	#NULL!	#NULL!	30715.1	#NULL!	#NULL!	#NULL!	#NULL!	#NULL!	#NULL!	#NULL!	#NULL!	512	517	1	2	8	8	8	8	2	8	1	8	2	8	1	2	2	2
A951937201	A9519372	2011	1	1	1	A951	1	62	#NULL!	1	1	4	7	7661.23	4788.6	8355.51	#NULL!	#NULL!	5475.76	5096.95	#NULL!	#NULL!	8557.17	#NULL!	#NULL!	#NULL!	#NULL!	#NULL!	#NULL!	#NULL!	#NULL!	512	517	1	2	8	2	8	8	2	8	1	8	2	8	1	1	2	2
A951938301	A9519383	2011	1	1	1	A951	1	66	#NULL!	2	2	2	6	7661.23	3663.23	7133.23	14095	#NULL!	4440.41	4730.28	22533.7	15362.8	14976.7	23507	#NULL!	#NULL!	#NULL!	#NULL!	#NULL!	#NULL!	#NULL!	512	517	1	2	8	2	8	8	2	8	1	8	2	8	2	8	8	8
A951938302	A9519383	2011	1	1	1	A951	2	64	#NULL!	2	2	1	7	7661.23	4709.7	8484.21	#NULL!	#NULL!	4975.89	4557.73	#NULL!	#NULL!	17285.3	#NULL!	#NULL!	#NULL!	#NULL!	#NULL!	#NULL!	#NULL!	#NULL!	512	517	1	2	8	2	8	8	2	8	2	3	2	8	2	8	8	8
A951938303	A9519383	2011	1	1	1	A951	1	12	#NULL!	1	2	1	#NULL!	7661.23	5282.99	#NULL!	#NULL!	#NULL!	5421.97	8331.85	#NULL!	#NULL!	#NULL!	#NULL!	#NULL!	#NULL!	#NULL!	#NULL!	#NULL!	#NULL!	#NULL!	512	517	1	2	8	8	8	8	8	8	1	8	2	8	2	8	8	8
A951938304	A9519383	2011	1	1	1	A951	1	10	#NULL!	1	2	1	#NULL!	7661.23	5282.99	#NULL!	#NULL!	#NULL!	5421.97	8331.85	#NULL!	#NULL!	#NULL!	#NULL!	#NULL!	#NULL!	#NULL!	#NULL!	#NULL!	#NULL!	#NULL!	512	517	1	2	8	8	8	8	8	8	8	8	8	8	2	8	8	8
A952931001	A9529310	2011	1	1	2	A952	1	55	#NULL!	4	4	4	1	2470.92	2511.22	#NULL!	3182.19	#NULL!	4432.13	4394.96	#NULL!	3679	#NULL!	#NULL!	#NULL!	#NULL!	#NULL!	#NULL!	#NULL!	#NULL!	#NULL!	501	501	1	1	2	2	8	8	2	8	1	8	2	8	2	8	8	8
A952931002	A9529310	2011	1	1	2	A952	2	51	#NULL!	4	4	4	1	2470.92	2142.89	#NULL!	2714.1	#NULL!	3106.78	3412.34	#NULL!	2820.03	#NULL!	#NULL!	#NULL!	#NULL!	#NULL!	#NULL!	#NULL!	#NULL!	#NULL!	501	501	1	2	8	2	8	8	2	8	1	8	2	8	2	8	8	8
A952931003	A9529310	2011	1	1	2	A952	2	13	#NULL!	4	4	1	#NULL!	2470.92	2722.07	4552.3	#NULL!	#NULL!	#NULL!	#NULL!	#NULL!	#NULL!	#NULL!	#NULL!	#NULL!	#NULL!	#NULL!	#NULL!	#NULL!	#NULL!	#NULL!	501	501	1	1	2	8	8	8	8	8	1	8	2	8	1	1	2	1
A952931101	A9529311	2011	1	1	2	A952	1	38	#NULL!	2	2	4	2	2470.92	4071.02	10692.9	#NULL!	#NULL!	4082.01	5969.62	#NULL!	#NULL!	13868.7	#NULL!	#NULL!	#NULL!	#NULL!	#NULL!	#NULL!	#NULL!	#NULL!	501	501	1	2	8	8	8	8	2	8	1	8	2	8	2	8	8	8
A952931102	A9529311	2011	1	1	2	A952	2	37	#NULL!	1	2	4	7	2470.92	2341.64	#NULL!	#NULL!	#NULL!	2457.21	2876.13	#NULL!	#NULL!	#NULL!	#NULL!	#NULL!	#NULL!	#NULL!	#NULL!	#NULL!	#NULL!	#NULL!	501	501	1	2	8	8	8	8	1	1	1	8	2	8	2	8	8	8
A952931103	A9529311	2011	1	1	2	A952	2	9	#NULL!	2	2	1	#NULL!	2470.92	1826.44	#NULL!	#NULL!	#NULL!	1987.71	2501.6	#NULL!	#NULL!	#NULL!	#NULL!	#NULL!	#NULL!	#NULL!	#NULL!	#NULL!	#NULL!	#NULL!	501	501	1	2	8	8	8	8	8	8	8	8	8	8	2	8	8	8
A952931104	A9529311	2011	1	1	2	A952	2	7	#NULL!	2	2	1	#NULL!	2470.92	1826.44	#NULL!	#NULL!	#NULL!	1987.71	2501.6	#NULL!	#NULL!	#NULL!	#NULL!	#NULL!	#NULL!	#NULL!	#NULL!	#NULL!	#NULL!	#NULL!	501	501	1	2	8	8	8	8	8	8	8	8	8	8	2	8	8	8
A952931802	A9529318	2011	1	1	2	A952	2	34	#NULL!	4	4	4	2	2470.92	4175.84	#NULL!	#NULL!	#NULL!	8882.59	7575.81	#NULL!	#NULL!	#NULL!	#NULL!	#NULL!	#NULL!	#NULL!	#NULL!	#NULL!	#NULL!	#NULL!	501	501	1	1	2	8	8	8	1	2	1	8	2	8	2	8	8	8
A952931803	A9529318	2011	1	1	2	A952	1	2	34	4	4	1	#NULL!	2470.92	2370.17	#NULL!	#NULL!	#NULL!	4686.07	4438.18	#NULL!	#NULL!	#NULL!	#NULL!	#NULL!	#NULL!	#NULL!	#NULL!	#NULL!	#NULL!	#NULL!	501	501	1	8	8	8	8	8	8	8	8	8	8	8	8	8	8	8
A952931804	A9529318	2011	1	1	2	A952	2	59	#NULL!	4	4	1	6	2470.92	2464.78	#NULL!	4397.53	#NULL!	#NULL!	#NULL!	#NULL!	#NULL!	#NULL!	#NULL!	#NULL!	#NULL!	#NULL!	#NULL!	#NULL!	#NULL!	#NULL!	501	501	1	1	2	1	2	2	1	2	1	8	1	1	1	1	1	1
A952932301	A9529323	2011	1	1	2	A952	1	48	#NULL!	3	4	3	3	2470.92	3971.14	#NULL!	5959.42	#NULL!	4439.16	6557.07	#NULL!	7220.31	#NULL!	#NULL!	#NULL!	#NULL!	#NULL!	#NULL!	#NULL!	#NULL!	#NULL!	501	501	1	2	8	2	8	8	2	8	1	8	2	8	2	8	8	8
A952932302	A9529323	2011	1	1	2	A952	2	45	#NULL!	3	4	3	2	2470.92	2679.2	10046.5	3627.1	#NULL!	2517.47	3101.69	13975.1	3816.64	7341.15	14633.8	#NULL!	#NULL!	#NULL!	#NULL!	#NULL!	#NULL!	#NULL!	501	501	1	2	8	2	8	8	2	8	1	8	2	8	2	8	8	8
A952932303	A9529323	2011	1	1	2	A952	1	18	#NULL!	3	4	2	7	2470.92	3397	11689.5	#NULL!	#NULL!	3798.56	5478.4	#NULL!	#NULL!	8251.21	#NULL!	#NULL!	#NULL!	#NULL!	#NULL!	#NULL!	#NULL!	#NULL!	501	501	1	2	8	8	8	8	8	8	1	8	1	1	2	8	8	8
A952933201	A9529332	2011	1	1	2	A952	1	39	#NULL!	4	4	4	1	2470.92	4071.02	#NULL!	#NULL!	#NULL!	#NULL!	#NULL!	#NULL!	#NULL!	#NULL!	#NULL!	#NULL!	#NULL!	#NULL!	#NULL!	#NULL!	#NULL!	#NULL!	501	501	1	2	8	8	8	8	2	8	1	8	2	8	2	8	8	8
A952933202	A9529332	2011	1	1	2	A952	2	36	#NULL!	4	4	4	1	2470.92	2341.64	#NULL!	#NULL!	#NULL!	4914.41	3834.84	#NULL!	#NULL!	#NULL!	#NULL!	#NULL!	#NULL!	#NULL!	#NULL!	#NULL!	#NULL!	#NULL!	501	501	1	2	8	8	8	8	1	2	1	8	2	8	2	8	8	8
A952933203	A9529332	2011	1	1	2	A952	1	5	62	4	4	1	#NULL!	2470.92	1924.55	#NULL!	#NULL!	#NULL!	3520.96	3436.59	#NULL!	#NULL!	#NULL!	#NULL!	#NULL!	#NULL!	#NULL!	#NULL!	#NULL!	#NULL!	#NULL!	501	501	1	2	8	8	8	8	8	8	8	8	8	8	8	8	8	8
A952933204	A9529332	2011	1	1	2	A952	1	1	19	4	4	1	#NULL!	2470.92	1580.11	#NULL!	#NULL!	#NULL!	3124.04	2958.79	#NULL!	#NULL!	#NULL!	#NULL!	#NULL!	#NULL!	#NULL!	#NULL!	#NULL!	#NULL!	#NULL!	501	501	1	8	8	8	8	8	8	8	8	8	8	8	8	8	8	8
A952933401	A9529334	2011	1	1	2	A952	1	49	#NULL!	3	3	4	1	2470.92	3971.14	13039.3	5959.42	#NULL!	#NULL!	#NULL!	16145.3	#NULL!	#NULL!	#NULL!	#NULL!	#NULL!	#NULL!	#NULL!	#NULL!	#NULL!	#NULL!	501	501	1	2	8	2	8	8	2	8	1	8	2	8	2	8	8	8
A952933402	A9529334	2011	1	1	2	A952	2	44	#NULL!	3	3	4	7	2470.92	2903.96	#NULL!	4049.63	#NULL!	4085.97	4249.19	#NULL!	7795.37	#NULL!	#NULL!	#NULL!	#NULL!	#NULL!	#NULL!	#NULL!	#NULL!	#NULL!	501	501	1	2	8	2	8	8	2	8	1	8	1	1	2	8	8	8
A952933403	A9529334	2011	1	1	2	A952	2	15	#NULL!	3	3	1	7	2470.92	3620.7	#NULL!	#NULL!	#NULL!	5191.49	6453.54	#NULL!	#NULL!	#NULL!	#NULL!	#NULL!	#NULL!	#NULL!	#NULL!	#NULL!	#NULL!	#NULL!	501	501	1	1	1	8	8	8	8	8	1	8	1	2	1	1	2	1
A952933404	A9529334	2011	1	1	2	A952	2	12	#NULL!	3	3	1	#NULL!	2470.92	2722.07	#NULL!	#NULL!	#NULL!	3856.11	4338.81	#NULL!	#NULL!	#NULL!	#NULL!	#NULL!	#NULL!	#NULL!	#NULL!	#NULL!	#NULL!	#NULL!	501	501	1	2	8	8	8	8	8	8	1	8	2	8	2	8	8	8
A952933601	A9529336	2011	1	1	2	A952	1	78	#NULL!	2	1	1	7	2470.92	1469.43	#NULL!	5513.93	#NULL!	1443.71	1565.48	#NULL!	5753.5	#NULL!	#NULL!	#NULL!	#NULL!	#NULL!	#NULL!	#NULL!	#NULL!	#NULL!	501	501	1	2	8	2	8	8	2	8	2	3	1	2	2	8	8	8
A952933602	A9529336	2011	1	1	2	A952	2	75	#NULL!	2	1	1	7	2470.92	1523.96	#NULL!	#NULL!	#NULL!	1514.44	1516.52	#NULL!	#NULL!	#NULL!	#NULL!	#NULL!	#NULL!	#NULL!	#NULL!	#NULL!	#NULL!	#NULL!	501	501	1	2	8	1	1	1	2	8	1	8	3	8	2	8	8	8
A952934003	A9529340	2011	1	1	2	A952	2	25	#NULL!	4	4	3	7	2470.92	9120.84	#NULL!	#NULL!	#NULL!	8623.83	9022.84	#NULL!	#NULL!	#NULL!	#NULL!	#NULL!	#NULL!	#NULL!	#NULL!	#NULL!	#NULL!	#NULL!	501	501	1	2	8	8	8	8	2	8	1	8	1	1	2	8	8	8
A952934701	A9529347	2011	1	1	2	A952	1	53	#NULL!	3	3	2	5	2470.92	3466.82	7796.74	4173.65	#NULL!	4021.54	4431.51	13918.7	5051.15	14049.8	16134.9	#NULL!	#NULL!	#NULL!	#NULL!	#NULL!	#NULL!	#NULL!	501	501	1	1	2	2	8	8	2	8	1	8	2	8	1	2	2	1
A952934702	A9529347	2011	1	1	2	A952	2	48	#NULL!	3	3	1	7	2470.92	2679.2	#NULL!	3627.1	#NULL!	2517.47	3101.69	#NULL!	3816.64	#NULL!	#NULL!	#NULL!	#NULL!	#NULL!	#NULL!	#NULL!	#NULL!	#NULL!	501	501	1	2	8	2	8	8	2	8	1	8	2	8	2	8	8	8
A952934704	A9529347	2011	1	1	2	A952	2	18	#NULL!	3	3	2	7	2470.92	3620.7	#NULL!	#NULL!	#NULL!	3893.62	4840.15	#NULL!	#NULL!	#NULL!	#NULL!	#NULL!	#NULL!	#NULL!	#NULL!	#NULL!	#NULL!	#NULL!	501	501	1	2	8	8	8	8	8	8	1	8	2	8	2	8	8	8
A952934705	A9529347	2011	1	1	2	A952	2	18	#NULL!	3	3	2	7	2470.92	3620.7	#NULL!	#NULL!	#NULL!	3893.62	4840.15	#NULL!	#NULL!	#NULL!	#NULL!	#NULL!	#NULL!	#NULL!	#NULL!	#NULL!	#NULL!	#NULL!	501	501	1	2	8	8	8	8	8	8	1	8	2	8	2	8	8	8
A952934901	A9529349	2011	1	1	2	A952	1	52	#NULL!	4	4	4	1	2470.92	3466.82	#NULL!	8347.31	#NULL!	#NULL!	#NULL!	#NULL!	#NULL!	#NULL!	#NULL!	#NULL!	#NULL!	#NULL!	#NULL!	#NULL!	#NULL!	#NULL!	501	501	1	2	8	2	8	8	2	8	1	8	2	8	1	1	2	2
A952934904	A9529349	2011	1	1	2	A952	1	19	#NULL!	4	4	3	7	2470.92	3397	#NULL!	#NULL!	#NULL!	7597.12	10956.8	#NULL!	#NULL!	#NULL!	#NULL!	#NULL!	#NULL!	#NULL!	#NULL!	#NULL!	#NULL!	#NULL!	501	501	1	1	2	8	8	8	2	8	1	8	2	8	1	1	2	1
A952935201	A9529352	2011	1	1	2	A952	1	56	#NULL!	4	4	4	1	2470.92	2511.22	#NULL!	3182.19	#NULL!	2954.76	2929.97	#NULL!	3679	#NULL!	#NULL!	#NULL!	#NULL!	#NULL!	#NULL!	#NULL!	#NULL!	#NULL!	501	501	1	2	8	2	8	8	2	8	1	8	1	2	2	8	8	8
A952935202	A9529352	2011	1	1	2	A952	2	51	#NULL!	4	4	4	7	2470.92	2142.89	9929.62	2714.1	#NULL!	2071.19	2274.89	13690.3	2820.03	9830.07	14345.7	#NULL!	#NULL!	#NULL!	#NULL!	#NULL!	#NULL!	#NULL!	501	501	1	1	2	2	8	8	2	8	1	8	2	8	1	1	1	1
A952935501	A9529355	2011	1	1	2	A952	1	56	#NULL!	4	4	4	1	2470.92	2511.22	5435.68	6364.39	#NULL!	2954.76	2929.97	9706.9	7358.01	6003.23	10720.7	#NULL!	#NULL!	#NULL!	#NULL!	#NULL!	#NULL!	#NULL!	501	501	1	2	8	2	8	8	2	8	1	8	1	1	2	8	8	8
A952935502	A9529355	2011	1	1	2	A952	2	50	#NULL!	4	4	3	7	2470.92	2142.89	#NULL!	#NULL!	#NULL!	2071.19	2274.89	#NULL!	#NULL!	#NULL!	#NULL!	#NULL!	#NULL!	#NULL!	#NULL!	#NULL!	#NULL!	#NULL!	501	501	1	2	8	2	8	8	1	2	1	8	2	8	2	8	8	8
A952935503	A9529355	2011	1	1	2	A952	2	21	#NULL!	4	4	3	3	2470.92	4023.12	6186.15	#NULL!	#NULL!	5420.92	5445.02	#NULL!	#NULL!	7038.87	#NULL!	#NULL!	#NULL!	#NULL!	#NULL!	#NULL!	#NULL!	#NULL!	501	501	1	2	8	8	8	8	2	8	1	8	2	8	2	8	8	8
A952936002	A9529360	2011	1	1	2	A952	2	57	#NULL!	3	4	2	7	2470.92	2190.92	#NULL!	3298.15	#NULL!	2064.25	2903.8	#NULL!	6642.04	#NULL!	#NULL!	#NULL!	#NULL!	#NULL!	#NULL!	#NULL!	#NULL!	#NULL!	501	501	1	2	8	1	2	1	2	8	2	3	1	2	2	8	8	8
A952936003	A9529360	2011	1	1	2	A952	2	37	#NULL!	3	4	4	2	2470.92	3122.18	#NULL!	#NULL!	#NULL!	3276.28	4314.19	#NULL!	#NULL!	#NULL!	#NULL!	#NULL!	#NULL!	#NULL!	#NULL!	#NULL!	#NULL!	#NULL!	501	501	1	2	8	8	8	8	1	2	1	8	2	8	1	2	2	2
A952936004	A9529360	2011	1	1	2	A952	1	9	#NULL!	4	4	1	#NULL!	2470.92	2566.07	#NULL!	#NULL!	#NULL!	2347.3	3866.16	#NULL!	#NULL!	#NULL!	#NULL!	#NULL!	#NULL!	#NULL!	#NULL!	#NULL!	#NULL!	#NULL!	501	501	1	2	8	8	8	8	8	8	8	8	8	8	2	8	8	8
A952936005	A9529360	2011	1	1	2	A952	1	4	49	4	4	1	#NULL!	2470.92	2106.82	#NULL!	#NULL!	#NULL!	2082.7	3328.64	#NULL!	#NULL!	#NULL!	#NULL!	#NULL!	#NULL!	#NULL!	#NULL!	#NULL!	#NULL!	#NULL!	501	501	1	1	2	8	8	8	8	8	8	8	8	8	8	8	8	8
A952936201	A9529362	2011	1	1	2	A952	1	57	#NULL!	4	4	4	5	2470.92	5022.45	#NULL!	3182.19	#NULL!	3939.67	5859.94	#NULL!	3679	#NULL!	#NULL!	#NULL!	#NULL!	#NULL!	#NULL!	#NULL!	#NULL!	#NULL!	501	501	1	2	8	2	8	8	2	8	1	8	1	1	2	8	8	8
A952936202	A9529362	2011	1	1	2	A952	2	53	#NULL!	4	4	3	2	2470.92	4285.77	#NULL!	2714.1	#NULL!	2761.58	4549.79	#NULL!	2820.03	#NULL!	#NULL!	#NULL!	#NULL!	#NULL!	#NULL!	#NULL!	#NULL!	#NULL!	501	501	1	2	8	2	8	8	2	8	1	8	2	8	2	8	8	8
A952936601	A9529366	2011	1	1	2	A952	1	37	#NULL!	4	4	4	1	2470.92	4071.02	#NULL!	#NULL!	#NULL!	4082.01	5969.62	#NULL!	#NULL!	#NULL!	#NULL!	#NULL!	#NULL!	#NULL!	#NULL!	#NULL!	#NULL!	#NULL!	501	501	1	2	8	8	8	8	2	8	1	8	2	8	2	8	8	8
A952936602	A9529366	2011	1	1	2	A952	2	35	#NULL!	4	4	4	7	2470.92	2341.64	#NULL!	#NULL!	#NULL!	2457.21	2876.13	#NULL!	#NULL!	#NULL!	#NULL!	#NULL!	#NULL!	#NULL!	#NULL!	#NULL!	#NULL!	#NULL!	501	501	1	2	8	8	8	8	2	8	1	8	2	8	2	8	8	8
A952936603	A9529366	2011	1	1	2	A952	2	5	61	4	4	1	#NULL!	2470.92	1826.44	#NULL!	#NULL!	#NULL!	1987.71	2501.6	#NULL!	#NULL!	#NULL!	#NULL!	#NULL!	#NULL!	#NULL!	#NULL!	#NULL!	#NULL!	#NULL!	501	501	1	2	8	8	8	8	8	8	8	8	8	8	8	8	8	8
A952937201	A9529372	2011	1	1	2	A952	1	77	#NULL!	4	3	3	7	2470.92	1469.43	#NULL!	#NULL!	#NULL!	1443.71	1565.48	#NULL!	#NULL!	#NULL!	#NULL!	#NULL!	#NULL!	#NULL!	#NULL!	#NULL!	#NULL!	#NULL!	501	501	1	2	8	2	8	8	2	8	2	3	2	8	2	8	8	8
A952937202	A9529372	2011	1	1	2	A952	2	74	#NULL!	4	3	3	7	2470.92	1444.46	#NULL!	5004.53	#NULL!	1387.86	1516.52	#NULL!	5222.09	#NULL!	#NULL!	#NULL!	#NULL!	#NULL!	#NULL!	#NULL!	#NULL!	#NULL!	501	501	1	2	8	2	8	8	2	8	3	3	1	1	1	1	1	1
A952937203	A9529372	2011	1	1	2	A952	1	45	#NULL!	2	3	4	1	2470.92	3971.14	19559	8939.12	#NULL!	4439.16	6557.07	24218	10830.5	23596	30674.4	#NULL!	#NULL!	#NULL!	#NULL!	#NULL!	#NULL!	#NULL!	501	501	1	2	8	2	8	8	2	8	1	8	2	8	2	8	8	8
A952938101	A9529381	2011	1	1	2	A952	1	60	#NULL!	4	4	3	2	2470.92	1737.49	#NULL!	2256.2	#NULL!	1986.82	1849.37	#NULL!	2528.79	#NULL!	#NULL!	#NULL!	#NULL!	#NULL!	#NULL!	#NULL!	#NULL!	#NULL!	501	501	1	2	8	2	8	8	2	8	1	8	2	8	2	8	8	8
A952938102	A9529381	2011	1	1	2	A952	2	58	#NULL!	4	4	2	7	2470.92	1643.19	5722.28	2198.77	#NULL!	1548.19	1935.86	10800.9	2214.01	5655.47	10816.8	#NULL!	#NULL!	#NULL!	#NULL!	#NULL!	#NULL!	#NULL!	501	501	1	2	8	2	8	8	2	8	1	8	2	8	2	8	8	8
A952938103	A9529381	2011	1	1	2	A952	2	31	#NULL!	4	4	4	1	2470.92	2783.89	7977.96	#NULL!	#NULL!	2960.86	3787.9	#NULL!	#NULL!	8361.66	#NULL!	#NULL!	#NULL!	#NULL!	#NULL!	#NULL!	#NULL!	#NULL!	501	501	1	2	8	8	8	8	2	8	1	8	2	8	2	8	8	8
A952938201	A9529382	2011	1	1	2	A952	1	64	#NULL!	4	4	4	1	2470.92	2606.23	9095.1	2256.2	#NULL!	2980.23	2774.05	8833.12	2528.79	9314.61	9792.19	#NULL!	#NULL!	#NULL!	#NULL!	#NULL!	#NULL!	#NULL!	501	501	1	1	2	2	8	8	2	8	2	3	2	8	1	1	1	1
A952938202	A9529382	2011	1	1	2	A952	2	62	#NULL!	4	4	4	1	2470.92	2563.29	#NULL!	1844.33	#NULL!	2708.17	2480.58	#NULL!	1927.63	#NULL!	#NULL!	#NULL!	#NULL!	#NULL!	#NULL!	#NULL!	#NULL!	#NULL!	501	501	1	2	8	2	8	8	2	8	1	8	2	8	2	8	8	8
A953931401	A9539314	2011	1	1	1	A953	2	80	#NULL!	3	2	1	7	6128.98	4200.11	#NULL!	#NULL!	#NULL!	4173.88	4179.59	#NULL!	#NULL!	#NULL!	#NULL!	#NULL!	#NULL!	#NULL!	#NULL!	#NULL!	#NULL!	#NULL!	512	517	1	2	8	1	3	2	2	8	3	3	2	8	2	8	8	8
A953931901	A9539319	2011	1	1	1	A953	1	32	#NULL!	1	2	3	5	6128.98	9742.08	#NULL!	#NULL!	#NULL!	10232	19737.5	#NULL!	#NULL!	#NULL!	#NULL!	#NULL!	#NULL!	#NULL!	#NULL!	#NULL!	#NULL!	#NULL!	512	517	1	2	8	8	8	8	2	8	1	8	2	8	2	8	8	8
A953931902	A9539319	2011	1	1	1	A953	2	28	#NULL!	1	2	3	7	6128.98	12568.7	#NULL!	#NULL!	#NULL!	11883.8	12433.7	#NULL!	#NULL!	#NULL!	#NULL!	#NULL!	#NULL!	#NULL!	#NULL!	#NULL!	#NULL!	#NULL!	512	517	1	2	8	8	8	8	2	8	1	8	2	8	2	8	8	8
A953931903	A9539319	2011	1	1	1	A953	1	7	#NULL!	1	2	1	#NULL!	6128.98	5304.16	#NULL!	#NULL!	#NULL!	4851.96	7103.54	#NULL!	#NULL!	#NULL!	#NULL!	#NULL!	#NULL!	#NULL!	#NULL!	#NULL!	#NULL!	#NULL!	512	517	1	2	8	8	8	8	8	8	8	8	8	8	2	8	8	8
A953932401	A9539324	2011	1	1	1	A953	1	76	#NULL!	1	1	1	7	6128.98	4049.82	#NULL!	7598.33	#NULL!	3978.95	4314.54	#NULL!	7928.45	#NULL!	#NULL!	#NULL!	#NULL!	#NULL!	#NULL!	#NULL!	#NULL!	#NULL!	512	517	1	2	8	2	8	8	2	8	1	8	2	8	2	8	8	8
A953932402	A9539324	2011	1	1	1	A953	2	77	#NULL!	1	1	1	6	6128.98	4200.11	#NULL!	9195.15	#NULL!	4173.88	4179.59	#NULL!	9594.89	#NULL!	#NULL!	#NULL!	#NULL!	#NULL!	#NULL!	#NULL!	#NULL!	#NULL!	512	517	1	2	8	2	8	8	2	8	2	3	2	8	2	8	8	8
A953932801	A9539328	2011	1	1	1	A953	1	56	#NULL!	4	4	4	1	6128.98	6921.05	#NULL!	8770.28	#NULL!	8143.45	8075.14	#NULL!	10139.5	#NULL!	#NULL!	#NULL!	#NULL!	#NULL!	#NULL!	#NULL!	#NULL!	#NULL!	512	517	1	2	8	2	8	8	2	8	1	8	2	8	2	8	8	8
A953932802	A9539328	2011	1	1	1	A953	2	50	#NULL!	4	4	3	7	6128.98	5905.89	#NULL!	7480.19	#NULL!	5708.29	6269.72	#NULL!	7772.12	#NULL!	#NULL!	#NULL!	#NULL!	#NULL!	#NULL!	#NULL!	#NULL!	#NULL!	512	517	1	2	8	2	8	8	2	8	1	8	1	1	2	8	8	8
A953932803	A9539328	2011	1	1	1	A953	2	25	#NULL!	4	4	4	1	6128.98	12568.7	30640.6	#NULL!	#NULL!	11883.8	12433.7	#NULL!	#NULL!	23574.9	#NULL!	#NULL!	#NULL!	#NULL!	#NULL!	#NULL!	#NULL!	#NULL!	512	517	1	2	8	8	8	8	2	8	1	8	1	1	2	8	8	8
A953932804	A9539328	2011	1	1	1	A953	2	17	#NULL!	4	4	2	7	6128.98	9978.82	39617	#NULL!	#NULL!	10731	13339.7	#NULL!	#NULL!	24878.1	#NULL!	#NULL!	#NULL!	#NULL!	#NULL!	#NULL!	#NULL!	#NULL!	512	517	1	2	8	8	8	8	8	8	1	8	2	8	1	1	1	1
A953933001	A9539330	2011	1	1	1	A953	1	68	#NULL!	1	1	3	7	6128.98	3663.23	7133.23	#NULL!	#NULL!	#NULL!	#NULL!	#NULL!	#NULL!	#NULL!	#NULL!	#NULL!	#NULL!	#NULL!	#NULL!	#NULL!	#NULL!	#NULL!	512	517	1	2	8	1	2	2	2	8	1	8	1	2	2	8	8	8
A953933401	A9539334	2011	1	1	1	A953	1	47	#NULL!	3	3	3	7	6128.98	10944.6	17968.5	16424.4	#NULL!	12234.5	18071.6	22248.6	19899.5	21677.3	28180	#NULL!	#NULL!	#NULL!	#NULL!	#NULL!	#NULL!	#NULL!	512	517	1	2	8	2	8	8	2	8	1	8	2	8	2	8	8	8
A953934002	A9539340	2011	1	1	1	A953	2	39	#NULL!	1	2	3	7	6128.98	12907.3	31105.7	#NULL!	#NULL!	9029.57	10569	#NULL!	#NULL!	30715.1	#NULL!	#NULL!	#NULL!	#NULL!	#NULL!	#NULL!	#NULL!	#NULL!	512	517	1	2	8	8	8	8	2	8	1	8	2	8	2	8	8	8
A953934003	A9539340	2011	1	1	1	A953	1	14	#NULL!	2	2	1	#NULL!	6128.98	10566	#NULL!	#NULL!	#NULL!	7229.3	11109.1	#NULL!	#NULL!	#NULL!	#NULL!	#NULL!	#NULL!	#NULL!	#NULL!	#NULL!	#NULL!	#NULL!	512	517	1	2	8	8	8	8	8	8	1	8	2	8	2	8	8	8
A953934004	A9539340	2011	1	1	1	A953	1	12	#NULL!	2	2	1	#NULL!	6128.98	10566	22066.7	#NULL!	#NULL!	7229.3	11109.1	#NULL!	#NULL!	18650.3	#NULL!	#NULL!	#NULL!	#NULL!	#NULL!	#NULL!	#NULL!	#NULL!	512	517	1	2	8	8	8	8	8	8	1	8	2	8	2	8	8	8
A953934301	A9539343	2011	1	1	1	A953	2	71	#NULL!	2	1	1	7	6128.98	3981.01	#NULL!	#NULL!	#NULL!	3825	4179.59	#NULL!	#NULL!	#NULL!	#NULL!	#NULL!	#NULL!	#NULL!	#NULL!	#NULL!	#NULL!	#NULL!	512	517	1	2	8	1	3	2	1	1	1	8	2	8	2	8	8	8
A953934404	A9539344	2011	1	1	1	A953	1	6	78	1	1	1	#NULL!	6128.98	10608.3	#NULL!	#NULL!	#NULL!	#NULL!	#NULL!	#NULL!	#NULL!	#NULL!	#NULL!	#NULL!	#NULL!	#NULL!	#NULL!	#NULL!	#NULL!	#NULL!	512	517	1	2	8	8	8	8	8	8	8	8	8	8	2	8	8	8
A953934501	A9539345	2011	1	1	1	A953	1	67	#NULL!	4	4	3	3	6128.98	3663.23	14266.5	7047.5	#NULL!	4440.41	4730.28	22533.7	7681.42	14976.7	23507	#NULL!	#NULL!	#NULL!	#NULL!	#NULL!	#NULL!	#NULL!	512	517	1	2	8	2	8	8	2	8	1	8	2	8	2	8	8	8
A953934502	A9539345	2011	1	1	1	A953	2	63	#NULL!	4	4	1	3	6128.98	4709.7	#NULL!	5083.05	#NULL!	4975.89	4557.73	#NULL!	5312.64	#NULL!	#NULL!	#NULL!	#NULL!	#NULL!	#NULL!	#NULL!	#NULL!	#NULL!	512	517	1	2	8	2	8	8	2	8	1	8	1	2	2	8	8	8
A953934601	A9539346	2011	1	1	1	A953	1	88	#NULL!	4	4	#NULL!	#NULL!	6128.98	6749.69	#NULL!	#NULL!	#NULL!	6631.58	7190.9	#NULL!	#NULL!	#NULL!	#NULL!	#NULL!	#NULL!	#NULL!	#NULL!	#NULL!	#NULL!	#NULL!	512	517	1	2	8	2	8	8	2	8	3	2	2	8	2	8	8	8
A953934602	A9539346	2011	1	1	1	A953	2	82	#NULL!	4	4	1	7	6128.98	7000.18	#NULL!	#NULL!	#NULL!	6956.47	6965.99	#NULL!	#NULL!	#NULL!	#NULL!	#NULL!	#NULL!	#NULL!	#NULL!	#NULL!	#NULL!	#NULL!	512	517	1	2	8	2	8	8	2	8	1	8	2	8	2	8	8	8
A953934604	A9539346	2011	1	1	1	A953	2	61	#NULL!	4	4	1	3	6128.98	7849.51	42421	#NULL!	#NULL!	8293.15	7596.22	#NULL!	#NULL!	43213.3	#NULL!	#NULL!	#NULL!	#NULL!	#NULL!	#NULL!	#NULL!	#NULL!	512	517	1	2	8	2	8	8	2	8	1	8	2	8	2	8	8	8
A953934901	A9539349	2011	1	1	1	A953	1	69	#NULL!	1	1	1	7	6128.98	3663.23	#NULL!	#NULL!	#NULL!	4440.41	4730.28	#NULL!	#NULL!	#NULL!	#NULL!	#NULL!	#NULL!	#NULL!	#NULL!	#NULL!	#NULL!	#NULL!	512	517	1	2	8	2	8	8	2	8	1	8	2	8	2	8	8	8
A953934902	A9539349	2011	1	1	1	A953	2	62	#NULL!	1	1	1	7	6128.98	4709.7	#NULL!	#NULL!	#NULL!	4975.89	4557.73	#NULL!	#NULL!	#NULL!	#NULL!	#NULL!	#NULL!	#NULL!	#NULL!	#NULL!	#NULL!	#NULL!	512	517	1	2	8	1	3	1	2	8	1	8	1	1	2	8	8	8
A953935101	A9539351	2011	1	1	1	A953	2	69	#NULL!	4	4	1	7	6128.98	4448.16	#NULL!	10116.3	#NULL!	6443.5	4192.54	#NULL!	11455.3	#NULL!	#NULL!	#NULL!	#NULL!	#NULL!	#NULL!	#NULL!	#NULL!	#NULL!	512	517	1	2	8	2	8	8	2	8	1	8	2	8	2	8	8	8
A953935102	A9539351	2011	1	1	1	A953	1	40	#NULL!	4	4	3	5	6128.98	12597.4	#NULL!	#NULL!	#NULL!	13890.5	17499.9	#NULL!	#NULL!	#NULL!	#NULL!	#NULL!	#NULL!	#NULL!	#NULL!	#NULL!	#NULL!	#NULL!	512	517	1	2	8	2	8	8	2	8	1	8	2	8	2	8	8	8
A953935302	A9539353	2011	1	1	1	A953	2	41	#NULL!	1	2	3	7	6128.98	16006.9	#NULL!	22321.9	#NULL!	16891.7	19635.6	#NULL!	21484.4	#NULL!	#NULL!	#NULL!	#NULL!	#NULL!	#NULL!	#NULL!	#NULL!	#NULL!	512	517	1	2	8	2	8	8	2	8	1	8	2	8	2	8	8	8
A953936701	A9539367	2011	1	1	1	A953	1	63	#NULL!	2	2	1	7	6128.98	4788.6	#NULL!	#NULL!	#NULL!	5475.76	5096.95	#NULL!	#NULL!	#NULL!	#NULL!	#NULL!	#NULL!	#NULL!	#NULL!	#NULL!	#NULL!	#NULL!	512	517	1	2	8	2	8	8	2	8	1	8	2	8	2	8	8	8
A953936702	A9539367	2011	1	1	1	A953	2	61	#NULL!	2	2	1	7	6128.98	4709.7	12726.3	10166.1	#NULL!	4975.89	4557.73	24074.1	10625.3	12964	25088.4	#NULL!	#NULL!	#NULL!	#NULL!	#NULL!	#NULL!	#NULL!	512	517	1	2	8	2	8	8	2	8	1	8	2	8	2	8	8	8
A953936703	A9539367	2011	1	1	1	A953	2	29	#NULL!	1	2	4	2	6128.98	12568.7	15320.3	#NULL!	#NULL!	11883.8	12433.7	#NULL!	#NULL!	17681.2	#NULL!	#NULL!	#NULL!	#NULL!	#NULL!	#NULL!	#NULL!	#NULL!	512	517	1	2	8	8	8	8	2	8	1	8	2	8	1	2	2	2
A953936801	A9539368	2011	1	1	1	A953	1	49	#NULL!	2	2	3	3	6128.98	10944.6	#NULL!	16424.4	#NULL!	12234.5	18071.6	#NULL!	19899.5	#NULL!	#NULL!	#NULL!	#NULL!	#NULL!	#NULL!	#NULL!	#NULL!	#NULL!	512	517	1	2	8	2	8	8	2	8	1	8	2	8	2	8	8	8
A953936802	A9539368	2011	1	1	1	A953	2	44	#NULL!	2	2	3	3	6128.98	8003.44	46243.5	11161	#NULL!	8445.84	8783.22	43535.9	10742.2	27442	44319.9	#NULL!	#NULL!	#NULL!	#NULL!	#NULL!	#NULL!	#NULL!	512	517	1	2	8	1	2	2	2	8	2	3	2	8	1	1	2	2
A953936803	A9539368	2011	1	1	1	A953	2	19	#NULL!	2	2	3	3	6128.98	9978.82	#NULL!	#NULL!	#NULL!	10731	13339.7	#NULL!	#NULL!	#NULL!	#NULL!	#NULL!	#NULL!	#NULL!	#NULL!	#NULL!	#NULL!	#NULL!	512	517	1	2	8	8	8	8	1	1	1	8	2	8	2	8	8	8
A953936804	A9539368	2011	1	1	1	A953	1	18	#NULL!	2	2	2	7	6128.98	9362.28	48325	#NULL!	#NULL!	10469	15098.7	#NULL!	#NULL!	30321	#NULL!	#NULL!	#NULL!	#NULL!	#NULL!	#NULL!	#NULL!	#NULL!	512	517	1	2	8	8	8	8	8	8	1	8	2	8	1	1	2	2
A953936901	A9539369	2011	1	1	1	A953	1	32	#NULL!	3	3	3	5	6128.98	9742.08	18212.1	#NULL!	#NULL!	#NULL!	#NULL!	#NULL!	#NULL!	#NULL!	#NULL!	#NULL!	#NULL!	#NULL!	#NULL!	#NULL!	#NULL!	#NULL!	512	517	1	2	8	8	8	8	2	8	1	8	2	8	1	1	2	1
A953937301	A9539373	2011	1	1	1	A953	2	50	#NULL!	1	2	3	6	6128.98	17717.7	#NULL!	7480.19	#NULL!	8562.43	18809.1	#NULL!	7772.12	#NULL!	#NULL!	#NULL!	#NULL!	#NULL!	#NULL!	#NULL!	#NULL!	#NULL!	512	517	1	2	8	2	8	8	2	8	1	8	2	8	2	8	8	8
A953937901	A9539379	2011	1	1	1	A953	1	63	#NULL!	4	4	2	3	6128.98	4788.6	#NULL!	12436.4	#NULL!	5475.76	5096.95	#NULL!	13938.9	#NULL!	#NULL!	#NULL!	#NULL!	#NULL!	#NULL!	#NULL!	#NULL!	#NULL!	512	517	1	2	8	2	8	8	2	8	1	8	2	8	2	8	8	8
A953938301	A9539383	2011	1	1	1	A953	1	58	#NULL!	3	4	3	5	6128.98	9228.07	#NULL!	8770.28	#NULL!	10857.9	10766.9	#NULL!	10139.5	#NULL!	#NULL!	#NULL!	#NULL!	#NULL!	#NULL!	#NULL!	#NULL!	#NULL!	512	517	1	2	8	2	8	8	2	8	1	8	2	8	2	8	8	8
A953938302	A9539383	2011	1	1	1	A953	2	58	#NULL!	3	4	3	3	6128.98	6038.27	21027.8	6059.91	#NULL!	5689.18	7113.78	29767.8	6101.93	20782.3	29811.7	#NULL!	#NULL!	#NULL!	#NULL!	#NULL!	#NULL!	#NULL!	512	517	1	2	8	2	8	8	2	8	1	8	2	8	2	8	8	8
A953938303	A9539383	2011	1	1	1	A953	1	28	#NULL!	3	4	4	7	6128.98	18436.3	26272	#NULL!	#NULL!	19549.1	22424	#NULL!	#NULL!	30759.9	#NULL!	#NULL!	#NULL!	#NULL!	#NULL!	#NULL!	#NULL!	#NULL!	512	517	1	2	8	8	8	8	2	8	1	8	2	8	2	8	8	8
A954919401	A9549194	2011	1	1	2	A954	1	60	#NULL!	4	4	4	1	3037.2	3025.54	10558.4	2619.2	#NULL!	3459.71	3220.36	10254.3	2935.63	10813.2	11367.6	#NULL!	#NULL!	#NULL!	#NULL!	#NULL!	#NULL!	#NULL!	501	501	1	2	8	2	8	8	2	8	1	8	1	1	1	1	1	1
A954919402	A9549194	2011	1	1	2	A954	2	55	#NULL!	4	4	3	7	3037.2	2861.34	#NULL!	2552.52	#NULL!	2695.91	3370.98	#NULL!	2570.22	#NULL!	#NULL!	#NULL!	#NULL!	#NULL!	#NULL!	#NULL!	#NULL!	#NULL!	501	501	1	2	8	2	8	8	1	2	2	3	1	1	1	1	1	1
A954919701	A9549197	2011	1	1	2	A954	1	77	#NULL!	4	4	4	7	3037.2	1705.84	#NULL!	#NULL!	#NULL!	1675.99	1817.35	#NULL!	#NULL!	#NULL!	#NULL!	#NULL!	#NULL!	#NULL!	#NULL!	#NULL!	#NULL!	#NULL!	501	501	1	1	2	2	8	8	2	8	1	8	2	8	1	1	1	1
A954919702	A9549197	2011	1	1	2	A954	2	75	#NULL!	4	4	2	7	3037.2	1769.15	#NULL!	7746.26	#NULL!	1758.1	1760.51	#NULL!	8083.01	#NULL!	#NULL!	#NULL!	#NULL!	#NULL!	#NULL!	#NULL!	#NULL!	#NULL!	501	501	1	2	8	2	8	8	2	8	1	8	2	8	2	8	8	8
A954920301	A9549203	2011	1	1	2	A954	2	56	#NULL!	2	2	4	1	3037.2	1907.56	#NULL!	2552.52	#NULL!	3594.55	4494.64	#NULL!	5140.44	#NULL!	#NULL!	#NULL!	#NULL!	#NULL!	#NULL!	#NULL!	#NULL!	#NULL!	501	501	1	2	8	1	3	2	2	8	1	8	1	1	1	1	1	1
A954920302	A9549203	2011	1	1	2	A954	2	62	#NULL!	3	2	3	7	3037.2	1983.8	7147.34	2141.06	#NULL!	#NULL!	#NULL!	10140.3	#NULL!	#NULL!	#NULL!	#NULL!	#NULL!	#NULL!	#NULL!	#NULL!	#NULL!	#NULL!	501	501	1	2	8	2	8	8	1	2	2	3	1	2	1	1	1	2
A954920402	A9549204	2011	1	1	2	A954	2	56	#NULL!	4	4	3	7	3037.2	5722.67	#NULL!	5105.04	#NULL!	2695.91	6741.96	#NULL!	5140.44	#NULL!	#NULL!	#NULL!	#NULL!	#NULL!	#NULL!	#NULL!	#NULL!	#NULL!	501	501	1	2	8	1	2	2	2	8	1	8	2	8	2	8	8	8
A954920901	A9549209	2011	1	1	2	A954	1	59	#NULL!	4	4	4	1	3037.2	4372.87	#NULL!	3694.17	#NULL!	5145.21	5102.05	#NULL!	4270.91	#NULL!	#NULL!	#NULL!	#NULL!	#NULL!	#NULL!	#NULL!	#NULL!	#NULL!	501	501	1	2	8	2	8	8	2	8	1	8	2	8	2	8	8	8
A954920902	A9549209	2011	1	1	2	A954	2	58	#NULL!	4	4	3	7	3037.2	2861.34	13285.8	2552.52	#NULL!	2695.91	3370.98	12538.7	2570.22	13130.7	12557.1	#NULL!	#NULL!	#NULL!	#NULL!	#NULL!	#NULL!	#NULL!	501	501	1	2	8	2	8	8	2	8	1	8	2	8	2	8	8	8
A954921602	A9549216	2011	1	1	2	A954	2	55	#NULL!	4	4	4	7	3037.2	2543.41	#NULL!	5105.04	#NULL!	2396.37	2996.43	#NULL!	5140.44	#NULL!	#NULL!	#NULL!	#NULL!	#NULL!	#NULL!	#NULL!	#NULL!	#NULL!	501	501	1	9	9	1	2	2	2	8	1	8	2	8	2	8	8	8
A954921603	A9549216	2011	1	1	2	A954	2	27	#NULL!	4	4	4	1	3037.2	7058.84	#NULL!	#NULL!	#NULL!	6674.2	6983	#NULL!	#NULL!	#NULL!	#NULL!	#NULL!	#NULL!	#NULL!	#NULL!	#NULL!	#NULL!	#NULL!	501	501	1	2	8	8	8	8	2	8	1	8	2	8	1	1	2	1
A954921604	A9549216	2011	1	1	2	A954	2	24	#NULL!	4	4	4	1	3037.2	6227.19	19150.4	#NULL!	#NULL!	8390.77	8428.07	#NULL!	#NULL!	21790.2	#NULL!	#NULL!	#NULL!	#NULL!	#NULL!	#NULL!	#NULL!	#NULL!	501	501	1	1	2	8	8	8	2	8	1	8	2	8	1	2	1	1
A954921901	A9549219	2011	1	1	2	A954	1	36	#NULL!	2	3	3	3	3037.2	4726	12413.2	#NULL!	#NULL!	4738.75	6930.06	#NULL!	#NULL!	16100	#NULL!	#NULL!	#NULL!	#NULL!	#NULL!	#NULL!	#NULL!	#NULL!	501	501	1	1	2	8	8	8	2	8	1	8	2	8	1	1	2	2
A954921902	A9549219	2011	1	1	2	A954	2	34	#NULL!	2	3	4	2	3037.2	3231.78	#NULL!	#NULL!	#NULL!	3437.23	4397.33	#NULL!	#NULL!	#NULL!	#NULL!	#NULL!	#NULL!	#NULL!	#NULL!	#NULL!	#NULL!	#NULL!	501	501	1	2	8	8	8	8	2	8	1	8	2	8	1	1	1	1
A954921903	A9549219	2011	1	1	2	A954	1	6	80	3	3	1	#NULL!	3037.2	2234.19	#NULL!	#NULL!	#NULL!	2043.72	2992.12	#NULL!	#NULL!	#NULL!	#NULL!	#NULL!	#NULL!	#NULL!	#NULL!	#NULL!	#NULL!	#NULL!	501	501	1	2	8	8	8	8	8	8	8	8	8	8	2	8	8	8
A954921904	A9549219	2011	1	1	2	A954	2	3	37	3	3	1	#NULL!	3037.2	1705.11	#NULL!	#NULL!	#NULL!	1637.16	2612.47	#NULL!	#NULL!	#NULL!	#NULL!	#NULL!	#NULL!	#NULL!	#NULL!	#NULL!	#NULL!	#NULL!	501	501	1	8	8	8	8	8	8	8	8	8	8	8	8	8	8	8
A954922201	A9549222	2011	1	1	2	A954	1	36	#NULL!	4	4	4	1	3037.2	4726	#NULL!	#NULL!	#NULL!	#NULL!	#NULL!	#NULL!	#NULL!	#NULL!	#NULL!	#NULL!	#NULL!	#NULL!	#NULL!	#NULL!	#NULL!	#NULL!	501	501	1	2	8	8	8	8	2	8	1	8	2	8	2	8	8	8
A954922202	A9549222	2011	1	1	2	A954	2	31	#NULL!	4	4	4	7	3037.2	3231.78	#NULL!	#NULL!	#NULL!	6874.46	8794.66	#NULL!	#NULL!	#NULL!	#NULL!	#NULL!	#NULL!	#NULL!	#NULL!	#NULL!	#NULL!	#NULL!	501	501	1	2	8	8	8	8	2	8	1	8	2	8	2	8	8	8
A954922901	A9549229	2011	1	1	2	A954	1	45	#NULL!	4	4	4	2	3037.2	4610.05	15137.2	6918.21	#NULL!	#NULL!	#NULL!	9371.44	#NULL!	#NULL!	#NULL!	#NULL!	#NULL!	#NULL!	#NULL!	#NULL!	#NULL!	#NULL!	501	501	1	2	8	2	8	8	2	8	1	8	2	8	2	8	8	8
A954922902	A9549229	2011	1	1	2	A954	2	38	#NULL!	4	4	4	7	3037.2	2718.38	#NULL!	#NULL!	#NULL!	5705.08	4451.81	#NULL!	#NULL!	#NULL!	#NULL!	#NULL!	#NULL!	#NULL!	#NULL!	#NULL!	#NULL!	#NULL!	501	501	1	2	8	8	8	8	2	8	1	8	2	8	2	8	8	8
A954922903	A9549229	2011	1	1	2	A954	1	7	#NULL!	4	4	1	#NULL!	3037.2	2234.19	#NULL!	#NULL!	#NULL!	4087.43	3989.49	#NULL!	#NULL!	#NULL!	#NULL!	#NULL!	#NULL!	#NULL!	#NULL!	#NULL!	#NULL!	#NULL!	501	501	1	2	8	8	8	8	8	8	8	8	8	8	1	1	1	1
A954922904	A9549229	2011	1	1	2	A954	2	3	36	4	4	1	#NULL!	3037.2	1705.11	#NULL!	#NULL!	#NULL!	3274.32	3483.3	#NULL!	#NULL!	#NULL!	#NULL!	#NULL!	#NULL!	#NULL!	#NULL!	#NULL!	#NULL!	#NULL!	501	501	1	8	8	8	8	8	8	8	8	8	8	8	8	8	8	8
A954923001	A9549230	2011	1	1	2	A954	1	44	#NULL!	3	3	4	7	3037.2	5306.21	#NULL!	5887.55	#NULL!	5850.87	7371.23	#NULL!	7700.71	#NULL!	#NULL!	#NULL!	#NULL!	#NULL!	#NULL!	#NULL!	#NULL!	#NULL!	501	501	1	2	8	2	8	8	2	8	1	8	2	8	2	8	8	8
A954923003	A9549230	2011	1	1	2	A954	2	10	#NULL!	3	3	1	#NULL!	3037.2	3160.02	#NULL!	#NULL!	#NULL!	3357.38	3777.65	#NULL!	#NULL!	#NULL!	#NULL!	#NULL!	#NULL!	#NULL!	#NULL!	#NULL!	#NULL!	#NULL!	501	501	1	2	8	8	8	8	8	8	8	8	8	8	2	8	8	8
A954923501	A9549235	2011	1	1	2	A954	1	73	#NULL!	4	4	4	6	3037.2	2492.45	#NULL!	3200.53	#NULL!	3722.15	1817.35	#NULL!	3339.58	#NULL!	#NULL!	#NULL!	#NULL!	#NULL!	#NULL!	#NULL!	#NULL!	#NULL!	501	501	1	2	8	1	2	2	2	8	2	3	1	2	1	1	1	1
A954923502	A9549235	2011	1	1	2	A954	2	70	#NULL!	4	4	4	7	3037.2	1676.86	#NULL!	3873.13	#NULL!	1611.14	1760.51	#NULL!	4041.51	#NULL!	#NULL!	#NULL!	#NULL!	#NULL!	#NULL!	#NULL!	#NULL!	#NULL!	501	501	1	2	8	1	3	2	1	2	2	3	1	2	2	8	8	8
A954923601	A9549236	2011	1	1	2	A954	2	60	#NULL!	4	4	4	7	3037.2	1983.8	#NULL!	2141.06	#NULL!	6287.75	5759.35	#NULL!	4475.52	#NULL!	#NULL!	#NULL!	#NULL!	#NULL!	#NULL!	#NULL!	#NULL!	#NULL!	501	501	1	2	8	2	8	8	2	8	1	8	2	8	2	8	8	8
A954923602	A9549236	2011	1	1	2	A954	1	63	#NULL!	4	4	4	1	3037.2	2017.03	#NULL!	2619.2	#NULL!	#NULL!	#NULL!	#NULL!	#NULL!	#NULL!	#NULL!	#NULL!	#NULL!	#NULL!	#NULL!	#NULL!	#NULL!	#NULL!	501	501	1	2	8	2	8	8	2	8	2	3	1	2	2	8	8	8
A954923604	A9549236	2011	1	1	2	A954	2	25	#NULL!	4	4	4	1	3037.2	5294.13	12906.2	#NULL!	#NULL!	#NULL!	#NULL!	#NULL!	#NULL!	#NULL!	#NULL!	#NULL!	#NULL!	#NULL!	#NULL!	#NULL!	#NULL!	#NULL!	501	501	1	2	8	8	8	8	2	8	1	8	2	8	2	8	8	8
A954923802	A9549238	2011	1	1	2	A954	2	59	#NULL!	4	4	1	7	3037.2	2861.34	#NULL!	5105.04	#NULL!	#NULL!	#NULL!	#NULL!	#NULL!	#NULL!	#NULL!	#NULL!	#NULL!	#NULL!	#NULL!	#NULL!	#NULL!	#NULL!	501	501	1	2	8	2	8	8	2	8	2	3	2	8	1	1	1	1
A954924502	A9549245	2011	1	1	2	A954	2	55	#NULL!	4	4	3	7	3037.2	3815.11	#NULL!	5105.04	#NULL!	7189.1	8989.28	#NULL!	5140.44	#NULL!	#NULL!	#NULL!	#NULL!	#NULL!	#NULL!	#NULL!	#NULL!	#NULL!	501	501	1	2	8	2	8	8	2	8	1	8	1	2	1	1	2	1
A954924504	A9549245	2011	1	1	2	A954	2	24	#NULL!	4	4	4	1	3037.2	9340.78	#NULL!	#NULL!	#NULL!	#NULL!	#NULL!	#NULL!	#NULL!	#NULL!	#NULL!	#NULL!	#NULL!	#NULL!	#NULL!	#NULL!	#NULL!	#NULL!	501	501	1	2	8	8	8	8	2	8	1	8	2	8	2	8	8	8
A954924601	A9549246	2011	1	1	2	A954	1	51	#NULL!	4	4	4	1	3037.2	4024.59	12068.2	4845.14	#NULL!	#NULL!	#NULL!	16158	#NULL!	#NULL!	#NULL!	#NULL!	#NULL!	#NULL!	#NULL!	#NULL!	#NULL!	#NULL!	501	501	1	2	8	2	8	8	2	8	1	8	2	8	2	8	8	8
A954924602	A9549246	2011	1	1	2	A954	2	46	#NULL!	4	4	4	7	3037.2	3110.25	#NULL!	4210.65	#NULL!	4383.75	5401.08	#NULL!	8861.38	#NULL!	#NULL!	#NULL!	#NULL!	#NULL!	#NULL!	#NULL!	#NULL!	#NULL!	501	501	1	2	8	1	3	2	2	8	1	8	2	8	1	2	2	2
A954924603	A9549246	2011	1	1	2	A954	1	18	#NULL!	4	4	2	7	3037.2	3943.53	13570.1	#NULL!	#NULL!	6614.55	9539.71	#NULL!	#NULL!	19157.4	#NULL!	#NULL!	#NULL!	#NULL!	#NULL!	#NULL!	#NULL!	#NULL!	501	501	1	1	2	8	8	8	8	8	1	8	1	1	1	2	2	2
A954925001	A9549250	2011	1	1	2	A954	1	64	#NULL!	4	4	4	7	3037.2	2017.03	#NULL!	#NULL!	#NULL!	3459.71	3220.36	#NULL!	#NULL!	#NULL!	#NULL!	#NULL!	#NULL!	#NULL!	#NULL!	#NULL!	#NULL!	#NULL!	501	501	1	2	8	2	8	8	2	8	1	8	2	8	2	8	8	8
A954925002	A9549250	2011	1	1	2	A954	2	59	#NULL!	4	4	4	7	3037.2	1907.56	#NULL!	5105.04	#NULL!	2695.91	3370.98	#NULL!	5140.44	#NULL!	#NULL!	#NULL!	#NULL!	#NULL!	#NULL!	#NULL!	#NULL!	#NULL!	501	501	1	2	8	1	3	2	2	8	1	8	1	2	2	8	8	8
A954925003	A9549250	2011	1	1	2	A954	1	31	#NULL!	4	4	4	1	3037.2	4103.51	#NULL!	#NULL!	#NULL!	#NULL!	#NULL!	#NULL!	#NULL!	#NULL!	#NULL!	#NULL!	#NULL!	#NULL!	#NULL!	#NULL!	#NULL!	#NULL!	501	501	1	2	8	8	8	8	2	8	1	8	2	8	2	8	8	8
A954925201	A9549252	2011	1	1	2	A954	1	63	#NULL!	4	4	4	7	3037.2	2689.37	#NULL!	3928.79	#NULL!	3075.29	2862.55	#NULL!	4403.45	#NULL!	#NULL!	#NULL!	#NULL!	#NULL!	#NULL!	#NULL!	#NULL!	#NULL!	501	501	1	2	8	2	8	8	1	2	2	3	1	1	2	8	8	8
A954925202	A9549252	2011	1	1	2	A954	2	55	#NULL!	4	4	3	3	3037.2	2543.41	#NULL!	3828.78	#NULL!	2396.37	2996.43	#NULL!	3855.33	#NULL!	#NULL!	#NULL!	#NULL!	#NULL!	#NULL!	#NULL!	#NULL!	#NULL!	501	501	1	2	8	2	8	8	2	8	1	8	1	1	2	8	8	8
A954925204	A9549252	2011	1	1	2	A954	2	85	#NULL!	4	4	1	7	3037.2	2358.86	#NULL!	#NULL!	#NULL!	2344.13	2347.34	#NULL!	#NULL!	#NULL!	#NULL!	#NULL!	#NULL!	#NULL!	#NULL!	#NULL!	#NULL!	#NULL!	501	501	1	2	8	1	3	2	2	8	2	3	1	2	2	8	8	8
A955919602	A9559196	2011	1	1	1	A955	2	74	#NULL!	3	2	3	7	7057.98	4125.99	#NULL!	#NULL!	#NULL!	3964.29	4331.8	#NULL!	#NULL!	#NULL!	#NULL!	#NULL!	#NULL!	#NULL!	#NULL!	#NULL!	#NULL!	#NULL!	512	517	1	2	8	2	8	8	2	8	4	3	2	8	2	8	8	8
A955919603	A9559196	2011	1	1	1	A955	1	51	#NULL!	1	2	#NULL!	#NULL!	7057.98	9902.67	#NULL!	#NULL!	#NULL!	11487.2	12658.2	#NULL!	#NULL!	#NULL!	#NULL!	#NULL!	#NULL!	#NULL!	#NULL!	#NULL!	#NULL!	#NULL!	512	517	1	2	8	2	8	8	2	8	1	8	1	1	2	8	8	8
A955919702	A9559197	2011	1	1	1	A955	2	33	#NULL!	1	1	#NULL!	#NULL!	7057.98	7951.94	#NULL!	#NULL!	#NULL!	8457.45	10819.8	#NULL!	#NULL!	#NULL!	#NULL!	#NULL!	#NULL!	#NULL!	#NULL!	#NULL!	#NULL!	#NULL!	512	517	1	1	2	8	8	8	2	8	1	8	1	1	1	1	2	2
A955919703	A9559197	2011	1	1	1	A955	2	9	#NULL!	1	1	1	#NULL!	7057.98	5217.07	#NULL!	#NULL!	#NULL!	5677.72	7145.62	#NULL!	#NULL!	#NULL!	#NULL!	#NULL!	#NULL!	#NULL!	#NULL!	#NULL!	#NULL!	#NULL!	512	517	1	2	8	8	8	8	8	8	8	8	8	8	2	8	8	8
A955919704	A9559197	2011	1	1	1	A955	2	8	#NULL!	1	1	1	#NULL!	7057.98	5217.07	#NULL!	#NULL!	#NULL!	5677.72	7145.62	#NULL!	#NULL!	#NULL!	#NULL!	#NULL!	#NULL!	#NULL!	#NULL!	#NULL!	#NULL!	#NULL!	512	517	1	2	8	8	8	8	8	8	8	8	8	8	2	8	8	8
A955919705	A9559197	2011	1	1	1	A955	2	2	35	1	1	1	#NULL!	7057.98	4195.49	#NULL!	#NULL!	#NULL!	4028.3	6428.11	#NULL!	#NULL!	#NULL!	#NULL!	#NULL!	#NULL!	#NULL!	#NULL!	#NULL!	#NULL!	#NULL!	512	517	1	8	8	8	8	8	8	8	8	8	8	8	8	8	8	8
A955919902	A9559199	2011	1	1	1	A955	2	69	#NULL!	1	1	1	7	7057.98	4610.14	9370.81	5242.36	#NULL!	6678.15	4345.22	15921.8	5936.23	10055.9	16866.5	#NULL!	#NULL!	#NULL!	#NULL!	#NULL!	#NULL!	#NULL!	512	517	1	2	8	1	2	2	2	8	1	8	1	2	2	8	8	8
A955920201	A9559202	2011	1	1	1	A955	2	72	#NULL!	4	2	4	7	7057.98	4125.99	#NULL!	9530.01	#NULL!	3964.29	4331.8	#NULL!	9944.3	#NULL!	#NULL!	#NULL!	#NULL!	#NULL!	#NULL!	#NULL!	#NULL!	#NULL!	512	517	1	2	8	2	8	8	2	8	1	8	2	8	1	1	2	2
A955920401	A9559204	2011	1	1	1	A955	1	78	#NULL!	1	1	1	7	7057.98	4197.3	#NULL!	#NULL!	#NULL!	4123.85	4471.66	#NULL!	#NULL!	#NULL!	#NULL!	#NULL!	#NULL!	#NULL!	#NULL!	#NULL!	#NULL!	#NULL!	512	517	1	2	8	2	8	8	2	8	3	3	2	8	2	8	8	8
A955920402	A9559204	2011	1	1	1	A955	2	70	#NULL!	1	1	1	6	7057.98	4125.99	#NULL!	#NULL!	#NULL!	3964.29	4331.8	#NULL!	#NULL!	#NULL!	#NULL!	#NULL!	#NULL!	#NULL!	#NULL!	#NULL!	#NULL!	#NULL!	512	517	1	2	8	2	8	8	2	8	4	1	2	8	2	8	8	8
A955920801	A9559208	2011	1	1	1	A955	1	31	#NULL!	2	2	4	6	7057.98	10096.9	#NULL!	#NULL!	#NULL!	10604.6	20456.2	#NULL!	#NULL!	#NULL!	#NULL!	#NULL!	#NULL!	#NULL!	#NULL!	#NULL!	#NULL!	#NULL!	512	517	1	2	8	8	8	8	2	8	1	8	2	8	2	8	8	8
A955921601	A9559216	2011	1	1	1	A955	1	54	#NULL!	2	3	3	7	7057.98	9902.67	#NULL!	#NULL!	#NULL!	11487.2	12658.2	#NULL!	#NULL!	#NULL!	#NULL!	#NULL!	#NULL!	#NULL!	#NULL!	#NULL!	#NULL!	#NULL!	512	517	1	2	8	1	1	2	2	8	1	8	1	1	2	8	8	8
A955921602	A9559216	2011	1	1	1	A955	2	52	#NULL!	2	3	3	7	7057.98	6120.97	#NULL!	15505.2	#NULL!	5916.17	6498.04	#NULL!	16110.3	#NULL!	#NULL!	#NULL!	#NULL!	#NULL!	#NULL!	#NULL!	#NULL!	#NULL!	512	517	1	2	8	2	8	8	2	8	1	8	2	8	2	8	8	8
A955921603	A9559216	2011	1	1	1	A955	1	26	#NULL!	2	3	4	1	7057.98	14709.4	#NULL!	#NULL!	#NULL!	19549.1	22424	#NULL!	#NULL!	#NULL!	#NULL!	#NULL!	#NULL!	#NULL!	#NULL!	#NULL!	#NULL!	#NULL!	512	517	1	2	8	8	8	8	2	8	1	8	1	1	1	2	2	1
A955921902	A9559219	2011	1	1	1	A955	1	28	#NULL!	2	3	4	1	7057.98	18436.3	27228.7	#NULL!	#NULL!	#NULL!	#NULL!	#NULL!	#NULL!	#NULL!	#NULL!	#NULL!	#NULL!	#NULL!	#NULL!	#NULL!	#NULL!	#NULL!	512	517	1	1	2	8	8	8	2	8	1	8	2	8	1	1	2	2
A955922301	A9559223	2011	1	1	1	A955	1	34	#NULL!	2	3	4	2	7057.98	10096.9	#NULL!	#NULL!	#NULL!	10604.6	20456.2	#NULL!	#NULL!	#NULL!	#NULL!	#NULL!	#NULL!	#NULL!	#NULL!	#NULL!	#NULL!	#NULL!	512	517	1	2	8	8	8	8	2	8	1	8	2	8	2	8	8	8
A955922302	A9559223	2011	1	1	1	A955	2	32	#NULL!	2	3	4	1	7057.98	7951.94	#NULL!	#NULL!	#NULL!	8457.45	10819.8	#NULL!	#NULL!	#NULL!	#NULL!	#NULL!	#NULL!	#NULL!	#NULL!	#NULL!	#NULL!	#NULL!	512	517	1	2	8	8	8	8	2	8	2	3	2	8	1	1	2	2
A955922303	A9559223	2011	1	1	1	A955	1	1	14	3	3	1	#NULL!	7057.98	4513.45	#NULL!	#NULL!	#NULL!	4461.78	6338.64	#NULL!	#NULL!	#NULL!	#NULL!	#NULL!	#NULL!	#NULL!	#NULL!	#NULL!	#NULL!	#NULL!	512	517	1	8	8	8	8	8	8	8	8	8	8	8	8	8	8	8
A955922902	A9559229	2011	1	1	1	A955	2	51	#NULL!	4	4	4	1	7057.98	17769.3	42544.6	7752.6	#NULL!	17748.5	19438.1	19552.5	8055.16	42118.1	20488.6	#NULL!	#NULL!	#NULL!	#NULL!	#NULL!	#NULL!	#NULL!	512	517	1	2	8	2	8	8	2	8	1	8	1	1	2	8	8	8
A955923401	A9559234	2011	1	1	1	A955	1	35	#NULL!	3	3	3	2	7057.98	11628.5	56586.1	#NULL!	#NULL!	15546.5	20462.1	#NULL!	#NULL!	63573.8	#NULL!	#NULL!	#NULL!	#NULL!	#NULL!	#NULL!	#NULL!	#NULL!	512	517	1	2	8	8	8	8	2	8	1	8	2	8	2	8	8	8
A955923402	A9559234	2011	1	1	1	A955	2	37	#NULL!	2	3	4	7	7057.98	6688.68	#NULL!	#NULL!	#NULL!	9358.4	9858.49	#NULL!	#NULL!	#NULL!	#NULL!	#NULL!	#NULL!	#NULL!	#NULL!	#NULL!	#NULL!	#NULL!	512	517	1	1	2	8	8	8	2	8	1	8	1	1	2	8	8	8
A955923403	A9559234	2011	1	1	1	A955	2	6	75	3	3	1	#NULL!	7057.98	5217.07	#NULL!	#NULL!	#NULL!	7570.3	8574.74	#NULL!	#NULL!	#NULL!	#NULL!	#NULL!	#NULL!	#NULL!	#NULL!	#NULL!	#NULL!	#NULL!	512	517	1	2	8	8	8	8	8	8	8	8	8	8	2	8	8	8
A955923404	A9559234	2011	1	1	1	A955	2	3	46	3	3	1	#NULL!	7057.98	4195.49	#NULL!	#NULL!	#NULL!	5371.07	7713.73	#NULL!	#NULL!	#NULL!	#NULL!	#NULL!	#NULL!	#NULL!	#NULL!	#NULL!	#NULL!	#NULL!	512	517	1	8	8	8	8	8	8	8	8	8	8	8	8	8	8	8
A955923405	A9559234	2011	1	1	1	A955	1	67	#NULL!	3	3	3	1	7057.98	3796.63	#NULL!	7304.15	#NULL!	#NULL!	#NULL!	#NULL!	#NULL!	#NULL!	#NULL!	#NULL!	#NULL!	#NULL!	#NULL!	#NULL!	#NULL!	#NULL!	512	517	1	2	8	2	8	8	2	8	1	8	2	8	2	8	8	8
A955923406	A9559234	2011	1	1	1	A955	2	61	#NULL!	3	3	3	7	7057.98	4881.22	#NULL!	5268.16	#NULL!	6876.13	5668.45	#NULL!	11012.2	#NULL!	#NULL!	#NULL!	#NULL!	#NULL!	#NULL!	#NULL!	#NULL!	#NULL!	512	517	1	2	8	2	8	8	2	8	1	8	1	1	2	8	8	8
A955924101	A9559241	2011	1	1	1	A955	1	71	#NULL!	1	1	4	7	7057.98	6132.79	#NULL!	#NULL!	#NULL!	9158.51	4471.66	#NULL!	#NULL!	#NULL!	#NULL!	#NULL!	#NULL!	#NULL!	#NULL!	#NULL!	#NULL!	#NULL!	512	517	1	1	2	1	1	2	2	8	3	3	1	2	1	2	2	2
A955924201	A9559242	2011	1	1	1	A955	2	41	#NULL!	1	1	3	7	7057.98	8294.9	#NULL!	11567.4	#NULL!	17506.8	12137.4	#NULL!	11133.4	#NULL!	#NULL!	#NULL!	#NULL!	#NULL!	#NULL!	#NULL!	#NULL!	#NULL!	512	517	1	2	8	2	8	8	2	8	1	8	2	8	2	8	8	8
A955924202	A9559242	2011	1	1	1	A955	1	13	#NULL!	1	1	1	#NULL!	7057.98	5475.38	11435.2	#NULL!	#NULL!	#NULL!	#NULL!	#NULL!	#NULL!	#NULL!	#NULL!	#NULL!	#NULL!	#NULL!	#NULL!	#NULL!	#NULL!	#NULL!	512	517	1	2	8	8	8	8	8	8	1	8	2	8	2	8	8	8
A955924203	A9559242	2011	1	1	1	A955	1	2	32	1	1	1	#NULL!	7057.98	4513.45	#NULL!	#NULL!	#NULL!	8923.56	8451.52	#NULL!	#NULL!	#NULL!	#NULL!	#NULL!	#NULL!	#NULL!	#NULL!	#NULL!	#NULL!	#NULL!	512	517	1	8	8	8	8	8	8	8	8	8	8	8	8	8	8	8
A955924204	A9559242	2011	1	1	1	A955	1	2	32	1	1	1	#NULL!	7057.98	4513.45	#NULL!	#NULL!	#NULL!	8923.56	8451.52	#NULL!	#NULL!	#NULL!	#NULL!	#NULL!	#NULL!	#NULL!	#NULL!	#NULL!	#NULL!	#NULL!	512	517	1	8	8	8	8	8	8	8	8	8	8	8	8	8	8	8
A955924301	A9559243	2011	1	1	1	A955	1	49	#NULL!	2	2	3	3	7057.98	11343.2	27934.2	17022.6	#NULL!	12680.1	18729.7	46117.7	20624.2	56166.7	58412.5	#NULL!	#NULL!	#NULL!	#NULL!	#NULL!	#NULL!	#NULL!	512	517	1	2	8	2	8	8	2	8	1	8	2	8	2	8	8	8
A955924302	A9559243	2011	1	1	1	A955	2	44	#NULL!	2	2	3	3	7057.98	8294.9	#NULL!	11567.4	#NULL!	8753.41	9103.08	#NULL!	11133.4	#NULL!	#NULL!	#NULL!	#NULL!	#NULL!	#NULL!	#NULL!	#NULL!	#NULL!	512	517	1	1	9	2	8	8	2	8	1	8	2	8	1	1	2	2
A955924303	A9559243	2011	1	1	1	A955	2	20	#NULL!	2	2	3	1	7057.98	11491.7	17670.2	#NULL!	#NULL!	15484.4	15553.2	#NULL!	#NULL!	33509.9	#NULL!	#NULL!	#NULL!	#NULL!	#NULL!	#NULL!	#NULL!	#NULL!	512	517	1	1	1	8	8	8	2	8	1	8	2	8	1	2	2	2
A955924304	A9559243	2011	1	1	1	A955	2	17	#NULL!	2	2	2	7	7057.98	10342.2	#NULL!	#NULL!	#NULL!	11121.8	13825.5	#NULL!	#NULL!	#NULL!	#NULL!	#NULL!	#NULL!	#NULL!	#NULL!	#NULL!	#NULL!	#NULL!	512	517	1	2	8	8	8	8	8	8	1	8	2	8	2	8	8	8
A955924305	A9559243	2011	1	1	1	A955	1	12	#NULL!	2	2	1	#NULL!	7057.98	5475.38	#NULL!	#NULL!	#NULL!	5619.42	8635.27	#NULL!	#NULL!	#NULL!	#NULL!	#NULL!	#NULL!	#NULL!	#NULL!	#NULL!	#NULL!	#NULL!	512	517	1	2	8	8	8	8	8	8	1	8	2	8	1	1	2	2
A955924601	A9559246	2011	1	1	1	A955	1	49	#NULL!	3	3	2	6	7057.98	11343.2	#NULL!	24490.4	#NULL!	16906.8	20673.6	#NULL!	27179.2	#NULL!	#NULL!	#NULL!	#NULL!	#NULL!	#NULL!	#NULL!	#NULL!	#NULL!	512	517	1	2	8	2	8	8	2	8	1	8	2	8	2	8	8	8
A955924602	A9559246	2011	1	1	1	A955	2	49	#NULL!	3	3	3	3	7057.98	7652.91	43045.3	15540.7	#NULL!	9587.92	11074.7	59877.9	16352.9	64561.8	62700.2	#NULL!	#NULL!	#NULL!	#NULL!	#NULL!	#NULL!	#NULL!	512	517	1	2	8	2	8	8	2	8	1	8	2	8	2	8	8	8
A955924603	A9559246	2011	1	1	1	A955	2	16	#NULL!	3	3	2	7	7057.98	10342.2	41059.7	#NULL!	#NULL!	#NULL!	#NULL!	#NULL!	#NULL!	#NULL!	#NULL!	#NULL!	#NULL!	#NULL!	#NULL!	#NULL!	#NULL!	#NULL!	512	517	1	2	8	8	8	8	8	8	1	8	2	8	2	8	8	8
A955924604	A9559246	2011	1	1	1	A955	2	10	#NULL!	3	3	1	#NULL!	7057.98	7775.37	#NULL!	#NULL!	#NULL!	11014.6	11618.8	#NULL!	#NULL!	#NULL!	#NULL!	#NULL!	#NULL!	#NULL!	#NULL!	#NULL!	#NULL!	#NULL!	512	517	1	2	8	8	8	8	8	8	8	8	8	8	2	8	8	8
A955924605	A9559246	2011	1	1	1	A955	2	74	#NULL!	4	3	1	7	7057.98	4125.99	#NULL!	#NULL!	#NULL!	5285.72	5414.75	#NULL!	#NULL!	#NULL!	#NULL!	#NULL!	#NULL!	#NULL!	#NULL!	#NULL!	#NULL!	#NULL!	512	517	1	2	8	2	8	8	2	8	1	8	2	8	2	8	8	8
A955924701	A9559247	2011	1	1	1	A955	1	78	#NULL!	3	2	1	7	7057.98	4197.3	#NULL!	7875.03	#NULL!	4123.85	4471.66	#NULL!	8217.18	#NULL!	#NULL!	#NULL!	#NULL!	#NULL!	#NULL!	#NULL!	#NULL!	#NULL!	512	517	1	2	8	2	8	8	2	8	1	8	2	8	2	8	8	8
A955924702	A9559247	2011	1	1	1	A955	2	74	#NULL!	3	2	1	7	7057.98	4125.99	#NULL!	9530.01	#NULL!	3964.29	4331.8	#NULL!	9944.3	#NULL!	#NULL!	#NULL!	#NULL!	#NULL!	#NULL!	#NULL!	#NULL!	#NULL!	512	517	1	2	8	2	8	8	2	8	2	3	2	8	2	8	8	8
A955925201	A9559252	2011	1	1	1	A955	1	33	#NULL!	1	1	3	6	7057.98	10096.9	#NULL!	#NULL!	#NULL!	#NULL!	#NULL!	#NULL!	#NULL!	#NULL!	#NULL!	#NULL!	#NULL!	#NULL!	#NULL!	#NULL!	#NULL!	#NULL!	512	517	1	2	8	8	8	8	2	8	1	8	2	8	2	8	8	8
A955925202	A9559252	2011	1	1	1	A955	2	31	#NULL!	1	1	3	7	7057.98	7951.94	45576.7	#NULL!	#NULL!	12686.2	14426.4	#NULL!	#NULL!	47768.7	#NULL!	#NULL!	#NULL!	#NULL!	#NULL!	#NULL!	#NULL!	#NULL!	512	517	1	2	8	8	8	8	2	8	1	8	2	8	2	8	8	8
A955925203	A9559252	2011	1	1	1	A955	2	4	51	1	1	1	#NULL!	7057.98	4195.49	#NULL!	#NULL!	#NULL!	6042.46	8570.81	#NULL!	#NULL!	#NULL!	#NULL!	#NULL!	#NULL!	#NULL!	#NULL!	#NULL!	#NULL!	#NULL!	512	517	1	2	8	8	8	8	8	8	8	8	8	8	8	8	8	8
A955925204	A9559252	2011	1	1	1	A955	2	54	#NULL!	1	1	3	7	7057.98	6120.97	#NULL!	7752.6	#NULL!	8874.25	8664.05	#NULL!	8055.16	#NULL!	#NULL!	#NULL!	#NULL!	#NULL!	#NULL!	#NULL!	#NULL!	#NULL!	512	517	1	1	1	2	8	8	2	8	1	8	1	1	1	2	2	2
A955928401	A9559284	2011	1	1	1	A955	1	58	#NULL!	3	4	#NULL!	#NULL!	7057.98	7173.09	15526.5	#NULL!	#NULL!	8440	8369.21	#NULL!	#NULL!	17147.7	#NULL!	#NULL!	#NULL!	#NULL!	#NULL!	#NULL!	#NULL!	#NULL!	512	517	1	2	8	2	8	8	2	8	1	8	2	8	2	8	8	8
A955928402	A9559284	2011	1	1	1	A955	2	54	#NULL!	3	4	4	7	7057.98	6120.97	#NULL!	15505.2	#NULL!	5916.17	6498.04	#NULL!	16110.3	#NULL!	#NULL!	#NULL!	#NULL!	#NULL!	#NULL!	#NULL!	#NULL!	#NULL!	512	517	1	2	8	1	1	2	2	8	1	8	1	1	1	1	2	2
A955928403	A9559284	2011	1	1	1	A955	1	28	#NULL!	3	4	3	7	7057.98	14709.4	20421.5	#NULL!	#NULL!	19549.1	22424	#NULL!	#NULL!	23910.1	#NULL!	#NULL!	#NULL!	#NULL!	#NULL!	#NULL!	#NULL!	#NULL!	512	517	1	2	8	8	8	8	2	8	1	8	2	8	2	8	8	8
A956919901	A9569199	2011	1	1	1	A956	1	44	#NULL!	2	2	4	2	6686.5	13056.2	31565.2	#NULL!	#NULL!	14396.3	18137.2	#NULL!	#NULL!	43885.3	#NULL!	#NULL!	#NULL!	#NULL!	#NULL!	#NULL!	#NULL!	#NULL!	512	517	1	2	8	2	8	8	2	8	1	8	2	8	2	8	8	8
A956919902	A9569199	2011	1	1	1	A956	2	45	#NULL!	2	2	4	7	6686.5	7652.91	#NULL!	20721	#NULL!	7190.94	8859.72	#NULL!	21803.8	#NULL!	#NULL!	#NULL!	#NULL!	#NULL!	#NULL!	#NULL!	#NULL!	#NULL!	512	517	1	2	8	2	8	8	2	8	1	8	2	8	2	8	8	8
A956919903	A9569199	2011	1	1	1	A956	1	12	#NULL!	2	2	1	#NULL!	6686.5	5475.38	#NULL!	#NULL!	#NULL!	5619.42	8635.27	#NULL!	#NULL!	#NULL!	#NULL!	#NULL!	#NULL!	#NULL!	#NULL!	#NULL!	#NULL!	#NULL!	512	517	1	2	8	8	8	8	8	8	1	8	2	8	1	1	1	1
A956919904	A9569199	2011	1	1	1	A956	1	11	#NULL!	2	2	1	#NULL!	6686.5	5475.38	22870.3	#NULL!	#NULL!	5619.42	8635.27	#NULL!	#NULL!	24161.9	#NULL!	#NULL!	#NULL!	#NULL!	#NULL!	#NULL!	#NULL!	#NULL!	512	517	1	2	8	8	8	8	8	8	8	8	8	8	2	8	8	8
A956919905	A9569199	2011	1	1	1	A956	2	10	#NULL!	2	2	1	#NULL!	6686.5	7775.37	#NULL!	#NULL!	#NULL!	8260.97	9295.07	#NULL!	#NULL!	#NULL!	#NULL!	#NULL!	#NULL!	#NULL!	#NULL!	#NULL!	#NULL!	#NULL!	512	517	1	2	8	8	8	8	8	8	8	8	8	8	2	8	8	8
A956920101	A9569201	2011	1	1	1	A956	1	64	#NULL!	3	3	4	2	6686.5	4962.99	12989.7	6444.64	#NULL!	8512.76	7923.85	25231	7223.26	26606.4	27970.5	#NULL!	#NULL!	#NULL!	#NULL!	#NULL!	#NULL!	#NULL!	512	517	1	2	8	2	8	8	2	8	1	8	2	8	2	8	8	8
A956920102	A9569201	2011	1	1	1	A956	2	51	#NULL!	2	3	2	3	6686.5	6120.97	#NULL!	7752.6	#NULL!	8874.25	9747.06	#NULL!	8055.16	#NULL!	#NULL!	#NULL!	#NULL!	#NULL!	#NULL!	#NULL!	#NULL!	#NULL!	512	517	1	2	8	1	2	2	2	8	1	8	2	8	2	8	8	8
A956920103	A9569201	2011	1	1	1	A956	2	32	#NULL!	2	3	4	1	6686.5	7951.94	22788.4	#NULL!	#NULL!	#NULL!	#NULL!	#NULL!	#NULL!	#NULL!	#NULL!	#NULL!	#NULL!	#NULL!	#NULL!	#NULL!	#NULL!	#NULL!	512	517	1	1	2	8	8	8	2	8	1	8	2	8	1	1	1	1
A956920301	A9569203	2011	1	1	1	A956	1	34	#NULL!	3	3	4	3	6686.5	10096.9	#NULL!	#NULL!	#NULL!	#NULL!	#NULL!	#NULL!	#NULL!	#NULL!	#NULL!	#NULL!	#NULL!	#NULL!	#NULL!	#NULL!	#NULL!	#NULL!	512	517	1	2	8	8	8	8	2	8	1	8	2	8	2	8	8	8
A956920302	A9569203	2011	1	1	1	A956	2	29	#NULL!	3	3	#NULL!	#NULL!	6686.5	13026.4	21170.9	#NULL!	#NULL!	#NULL!	#NULL!	#NULL!	#NULL!	#NULL!	#NULL!	#NULL!	#NULL!	#NULL!	#NULL!	#NULL!	#NULL!	#NULL!	512	517	1	2	8	8	8	8	2	8	1	8	2	8	2	8	8	8
A956920401	A9569204	2011	1	1	1	A956	1	47	#NULL!	4	4	4	2	6686.5	11343.2	#NULL!	17022.6	#NULL!	12680.1	18729.7	#NULL!	20624.2	#NULL!	#NULL!	#NULL!	#NULL!	#NULL!	#NULL!	#NULL!	#NULL!	#NULL!	512	517	1	2	8	2	8	8	2	8	2	3	1	1	2	8	8	8
A956920402	A9569204	2011	1	1	1	A956	2	43	#NULL!	4	4	4	1	6686.5	8294.9	31951.7	11567.4	#NULL!	8753.41	9103.08	45121.3	11133.4	28441.3	45933.8	#NULL!	#NULL!	#NULL!	#NULL!	#NULL!	#NULL!	#NULL!	512	517	1	2	8	2	8	8	2	8	1	8	2	8	2	8	8	8
A956920403	A9569204	2011	1	1	1	A956	2	14	#NULL!	4	4	1	#NULL!	6686.5	7775.37	26006.5	#NULL!	#NULL!	8260.97	9295.07	#NULL!	#NULL!	20297.5	#NULL!	#NULL!	#NULL!	#NULL!	#NULL!	#NULL!	#NULL!	#NULL!	512	517	1	2	8	8	8	8	8	8	1	8	2	8	2	8	8	8
A956920404	A9569204	2011	1	1	1	A956	1	10	#NULL!	4	4	1	#NULL!	6686.5	5475.38	#NULL!	#NULL!	#NULL!	5619.42	8635.27	#NULL!	#NULL!	#NULL!	#NULL!	#NULL!	#NULL!	#NULL!	#NULL!	#NULL!	#NULL!	#NULL!	512	517	1	2	8	8	8	8	8	8	8	8	8	8	2	8	8	8
A956920901	A9569209	2011	1	1	1	A956	2	72	#NULL!	1	1	1	6	6686.5	4125.99	#NULL!	9530.01	#NULL!	3964.29	4331.8	#NULL!	9944.3	#NULL!	#NULL!	#NULL!	#NULL!	#NULL!	#NULL!	#NULL!	#NULL!	#NULL!	512	517	1	2	8	2	8	8	2	8	1	8	2	8	2	8	8	8
A956921101	A9569211	2011	1	1	1	A956	1	37	#NULL!	4	4	4	7	6686.5	11628.5	30543.3	#NULL!	#NULL!	11659.9	17051.7	#NULL!	#NULL!	39614.7	#NULL!	#NULL!	#NULL!	#NULL!	#NULL!	#NULL!	#NULL!	#NULL!	512	517	1	2	8	8	8	8	2	8	1	8	1	2	2	8	8	8
A956921102	A9569211	2011	1	1	1	A956	2	35	#NULL!	4	4	4	1	6686.5	6688.68	#NULL!	#NULL!	#NULL!	7018.8	8215.41	#NULL!	#NULL!	#NULL!	#NULL!	#NULL!	#NULL!	#NULL!	#NULL!	#NULL!	#NULL!	#NULL!	512	517	1	2	8	8	8	8	1	1	1	8	2	8	1	1	2	2
A956921701	A9569217	2011	1	1	1	A956	1	33	#NULL!	2	2	4	1	6686.5	10096.9	#NULL!	#NULL!	#NULL!	10604.6	20456.2	#NULL!	#NULL!	#NULL!	#NULL!	#NULL!	#NULL!	#NULL!	#NULL!	#NULL!	#NULL!	#NULL!	512	517	1	2	8	8	8	8	2	8	1	8	2	8	2	8	8	8
A956921702	A9569217	2011	1	1	1	A956	2	35	#NULL!	2	2	4	7	6686.5	6688.68	#NULL!	#NULL!	#NULL!	7018.8	8215.41	#NULL!	#NULL!	#NULL!	#NULL!	#NULL!	#NULL!	#NULL!	#NULL!	#NULL!	#NULL!	#NULL!	512	517	1	1	1	8	8	8	2	8	1	8	2	8	1	1	2	1
A956921703	A9569217	2011	1	1	1	A956	2	2	35	2	2	1	#NULL!	6686.5	4195.49	#NULL!	#NULL!	#NULL!	4028.3	6428.11	#NULL!	#NULL!	#NULL!	#NULL!	#NULL!	#NULL!	#NULL!	#NULL!	#NULL!	#NULL!	#NULL!	512	517	1	8	8	8	8	8	8	8	8	8	8	8	8	8	8	8
A956921801	A9569218	2011	1	1	1	A956	1	49	#NULL!	2	2	4	1	6686.5	11343.2	#NULL!	24490.4	#NULL!	12680.1	18729.7	#NULL!	27179.2	#NULL!	#NULL!	#NULL!	#NULL!	#NULL!	#NULL!	#NULL!	#NULL!	#NULL!	512	517	1	2	8	2	8	8	2	8	2	3	1	2	1	2	2	2
A956921802	A9569218	2011	1	1	1	A956	2	44	#NULL!	2	2	3	3	6686.5	8294.9	31951.7	#NULL!	#NULL!	8753.41	9103.08	#NULL!	#NULL!	56882.6	#NULL!	#NULL!	#NULL!	#NULL!	#NULL!	#NULL!	#NULL!	#NULL!	512	517	1	2	8	2	8	8	2	8	1	8	1	2	2	8	8	8
A956921803	A9569218	2011	1	1	1	A956	1	17	#NULL!	1	2	2	7	6686.5	9703.22	#NULL!	#NULL!	#NULL!	10850.3	15648.6	#NULL!	#NULL!	#NULL!	#NULL!	#NULL!	#NULL!	#NULL!	#NULL!	#NULL!	#NULL!	#NULL!	512	517	1	1	2	8	8	8	8	8	1	8	2	8	1	1	1	1
A956921804	A9569218	2011	1	1	1	A956	1	14	#NULL!	2	2	1	#NULL!	6686.5	5475.38	#NULL!	#NULL!	#NULL!	5619.42	8635.27	#NULL!	#NULL!	#NULL!	#NULL!	#NULL!	#NULL!	#NULL!	#NULL!	#NULL!	#NULL!	#NULL!	512	517	1	2	8	8	8	8	8	8	1	8	2	8	2	8	8	8
A956921901	A9569219	2011	1	1	1	A956	2	33	#NULL!	4	4	4	1	6686.5	7951.94	30384.5	#NULL!	#NULL!	8457.45	10819.8	#NULL!	#NULL!	31845.8	#NULL!	#NULL!	#NULL!	#NULL!	#NULL!	#NULL!	#NULL!	#NULL!	512	517	1	2	8	8	8	8	2	8	1	8	2	8	2	8	8	8
A956921903	A9569219	2011	1	1	1	A956	2	6	80	4	4	1	#NULL!	6686.5	5217.07	#NULL!	#NULL!	#NULL!	5677.72	7145.62	#NULL!	#NULL!	#NULL!	#NULL!	#NULL!	#NULL!	#NULL!	#NULL!	#NULL!	#NULL!	#NULL!	512	517	1	2	8	8	8	8	8	8	8	8	8	8	2	8	8	8
A956921904	A9569219	2011	1	1	1	A956	1	3	41	4	4	1	#NULL!	6686.5	4513.45	#NULL!	#NULL!	#NULL!	4461.78	6338.64	#NULL!	#NULL!	#NULL!	#NULL!	#NULL!	#NULL!	#NULL!	#NULL!	#NULL!	#NULL!	#NULL!	512	517	1	8	8	8	8	8	8	8	8	8	8	8	8	8	8	8
A956921905	A9569219	2011	1	1	1	A956	2	58	#NULL!	3	4	2	6	6686.5	4693.63	#NULL!	#NULL!	#NULL!	4422.27	5529.63	#NULL!	#NULL!	#NULL!	#NULL!	#NULL!	#NULL!	#NULL!	#NULL!	#NULL!	#NULL!	#NULL!	512	517	1	1	2	1	2	2	2	8	1	8	2	8	1	2	1	2
A956922801	A9569228	2011	1	1	1	A956	2	56	#NULL!	1	1	3	7	6686.5	4693.63	10896.8	6280.59	#NULL!	4422.27	5529.63	15425.9	6324.14	10769.6	15448.7	#NULL!	#NULL!	#NULL!	#NULL!	#NULL!	#NULL!	#NULL!	512	517	1	2	8	2	8	8	2	8	1	8	2	8	2	8	8	8
A956923302	A9569233	2011	1	1	1	A956	2	24	#NULL!	2	3	3	2	6686.5	18011.8	#NULL!	#NULL!	#NULL!	15484.4	20074.5	#NULL!	#NULL!	#NULL!	#NULL!	#NULL!	#NULL!	#NULL!	#NULL!	#NULL!	#NULL!	#NULL!	512	517	1	2	8	8	8	8	2	8	1	8	2	8	2	8	8	8
A956923401	A9569234	2011	1	1	1	A956	1	32	#NULL!	2	3	4	5	6686.5	10096.9	#NULL!	#NULL!	#NULL!	10604.6	20456.2	#NULL!	#NULL!	#NULL!	#NULL!	#NULL!	#NULL!	#NULL!	#NULL!	#NULL!	#NULL!	#NULL!	512	517	1	1	2	8	8	8	2	8	1	8	2	8	1	1	2	2
A956923801	A9569238	2011	1	1	1	A956	1	47	#NULL!	2	2	3	2	6686.5	11343.2	#NULL!	24490.4	#NULL!	12680.1	18729.7	#NULL!	27179.2	#NULL!	#NULL!	#NULL!	#NULL!	#NULL!	#NULL!	#NULL!	#NULL!	#NULL!	512	517	1	2	8	2	8	8	2	8	1	8	2	8	2	8	8	8
A956923802	A9569238	2011	1	1	1	A956	2	41	#NULL!	2	2	3	1	6686.5	8294.9	#NULL!	#NULL!	#NULL!	8753.41	9103.08	#NULL!	#NULL!	#NULL!	#NULL!	#NULL!	#NULL!	#NULL!	#NULL!	#NULL!	#NULL!	#NULL!	512	517	1	2	8	1	2	2	2	8	1	8	2	8	1	1	1	1
A956923803	A9569238	2011	1	1	1	A956	2	14	#NULL!	1	2	1	#NULL!	6686.5	7775.37	#NULL!	#NULL!	#NULL!	8260.97	9295.07	#NULL!	#NULL!	#NULL!	#NULL!	#NULL!	#NULL!	#NULL!	#NULL!	#NULL!	#NULL!	#NULL!	512	517	1	2	8	8	8	8	8	8	1	8	2	8	1	1	1	1
A956923804	A9569238	2011	1	1	1	A956	1	10	#NULL!	2	2	1	#NULL!	6686.5	5475.38	22870.3	#NULL!	#NULL!	5619.42	8635.27	#NULL!	#NULL!	38659	#NULL!	#NULL!	#NULL!	#NULL!	#NULL!	#NULL!	#NULL!	#NULL!	512	517	1	2	8	8	8	8	8	8	8	8	8	8	1	1	1	1
A956924201	A9569242	2011	1	1	1	A956	1	27	#NULL!	1	2	3	1	6686.5	14709.4	27228.7	#NULL!	#NULL!	19549.1	22424	#NULL!	#NULL!	31880.1	#NULL!	#NULL!	#NULL!	#NULL!	#NULL!	#NULL!	#NULL!	#NULL!	512	517	1	1	1	8	8	8	2	8	1	8	2	8	1	1	2	2
A956924202	A9569242	2011	1	1	1	A956	2	54	#NULL!	1	2	2	7	6686.5	6120.97	#NULL!	7752.6	#NULL!	5916.17	6498.04	#NULL!	8055.16	#NULL!	#NULL!	#NULL!	#NULL!	#NULL!	#NULL!	#NULL!	#NULL!	#NULL!	512	517	1	1	2	2	8	8	2	8	1	8	1	2	2	8	8	8
A956924601	A9569246	2011	1	1	1	A956	2	65	#NULL!	4	4	#NULL!	#NULL!	6686.5	4610.14	#NULL!	5242.36	#NULL!	6678.15	4345.22	#NULL!	5936.23	#NULL!	#NULL!	#NULL!	#NULL!	#NULL!	#NULL!	#NULL!	#NULL!	#NULL!	512	517	1	2	8	2	8	8	2	8	1	8	2	8	2	8	8	8
A956924602	A9569246	2011	1	1	1	A956	2	37	#NULL!	4	4	4	1	6686.5	6688.68	#NULL!	#NULL!	#NULL!	7018.8	8215.41	#NULL!	#NULL!	#NULL!	#NULL!	#NULL!	#NULL!	#NULL!	#NULL!	#NULL!	#NULL!	#NULL!	512	517	1	2	8	8	8	8	1	1	1	8	2	8	2	8	8	8
A956924603	A9569246	2011	1	1	1	A956	1	37	#NULL!	4	4	4	1	6686.5	11628.5	#NULL!	#NULL!	#NULL!	11659.9	17051.7	#NULL!	#NULL!	#NULL!	#NULL!	#NULL!	#NULL!	#NULL!	#NULL!	#NULL!	#NULL!	#NULL!	512	517	1	1	2	8	8	8	2	8	1	8	2	8	1	1	2	1
A956924604	A9569246	2011	1	1	1	A956	1	3	41	4	4	1	#NULL!	6686.5	4513.45	#NULL!	#NULL!	#NULL!	4461.78	6338.64	#NULL!	#NULL!	#NULL!	#NULL!	#NULL!	#NULL!	#NULL!	#NULL!	#NULL!	#NULL!	#NULL!	512	517	1	8	8	8	8	8	8	8	8	8	8	8	8	8	8	8
A956924801	A9569248	2011	1	1	1	A956	1	77	#NULL!	3	1	4	7	6686.5	4197.3	#NULL!	#NULL!	#NULL!	4123.85	4471.66	#NULL!	#NULL!	#NULL!	#NULL!	#NULL!	#NULL!	#NULL!	#NULL!	#NULL!	#NULL!	#NULL!	512	517	1	2	8	2	8	8	2	8	1	8	2	8	2	8	8	8
A956924802	A9569248	2011	1	1	1	A956	2	74	#NULL!	2	1	#NULL!	#NULL!	6686.5	4125.99	#NULL!	#NULL!	#NULL!	3964.29	4331.8	#NULL!	#NULL!	#NULL!	#NULL!	#NULL!	#NULL!	#NULL!	#NULL!	#NULL!	#NULL!	#NULL!	512	517	1	2	8	1	2	2	2	8	1	8	2	8	2	8	8	8
A956925002	A9569250	2011	1	1	1	A956	2	46	#NULL!	1	2	3	6	6686.5	10203.9	#NULL!	#NULL!	#NULL!	#NULL!	#NULL!	#NULL!	#NULL!	#NULL!	#NULL!	#NULL!	#NULL!	#NULL!	#NULL!	#NULL!	#NULL!	#NULL!	512	517	1	2	8	2	8	8	2	8	1	8	2	8	2	8	8	8
A956925004	A9569250	2011	1	1	1	A956	1	19	#NULL!	1	2	3	7	6686.5	12937.6	#NULL!	#NULL!	#NULL!	#NULL!	#NULL!	#NULL!	#NULL!	#NULL!	#NULL!	#NULL!	#NULL!	#NULL!	#NULL!	#NULL!	#NULL!	#NULL!	512	517	1	2	8	8	8	8	2	8	1	8	2	8	2	8	8	8
A956925201	A9569252	2011	1	1	1	A956	1	34	#NULL!	2	2	4	1	6686.5	15145.3	#NULL!	#NULL!	#NULL!	10604.6	20572.1	#NULL!	#NULL!	#NULL!	#NULL!	#NULL!	#NULL!	#NULL!	#NULL!	#NULL!	#NULL!	#NULL!	512	517	1	2	8	8	8	8	2	8	1	8	2	8	2	8	8	8
A956925202	A9569252	2011	1	1	1	A956	2	31	#NULL!	2	2	4	7	6686.5	11927.9	#NULL!	#NULL!	#NULL!	8457.45	13524.8	#NULL!	#NULL!	#NULL!	#NULL!	#NULL!	#NULL!	#NULL!	#NULL!	#NULL!	#NULL!	#NULL!	512	517	1	1	2	8	8	8	2	8	1	8	1	1	1	1	2	2
A956925203	A9569252	2011	1	1	1	A956	1	5	62	2	2	1	#NULL!	6686.5	8245.98	#NULL!	#NULL!	#NULL!	5028.65	9202.79	#NULL!	#NULL!	#NULL!	#NULL!	#NULL!	#NULL!	#NULL!	#NULL!	#NULL!	#NULL!	#NULL!	512	517	1	2	8	8	8	8	8	8	8	8	8	8	8	8	8	8
A956925204	A9569252	2011	1	1	1	A956	2	1	18	2	2	1	#NULL!	6686.5	6293.24	#NULL!	#NULL!	#NULL!	4028.3	8035.13	#NULL!	#NULL!	#NULL!	#NULL!	#NULL!	#NULL!	#NULL!	#NULL!	#NULL!	#NULL!	#NULL!	512	517	1	8	8	8	8	8	8	8	8	8	8	8	8	8	8	8
A957914801	A9579148	2011	1	1	1	A957	2	62	#NULL!	4	4	2	3	7940.22	4881.22	#NULL!	5268.16	#NULL!	5157.09	4723.71	#NULL!	5506.11	#NULL!	#NULL!	#NULL!	#NULL!	#NULL!	#NULL!	#NULL!	#NULL!	#NULL!	512	517	1	2	8	2	8	8	2	8	1	8	2	8	2	8	8	8
A957914802	A9579148	2011	1	1	1	A957	1	57	#NULL!	3	4	3	6	7940.22	7173.09	#NULL!	9089.66	#NULL!	8440	8369.21	#NULL!	10508.8	#NULL!	#NULL!	#NULL!	#NULL!	#NULL!	#NULL!	#NULL!	#NULL!	#NULL!	512	517	1	2	8	2	8	8	2	8	1	8	2	8	2	8	8	8
A957914803	A9579148	2011	1	1	1	A957	1	40	#NULL!	4	4	2	5	7940.22	13056.2	#NULL!	14486.6	#NULL!	14396.3	18137.2	#NULL!	18947.9	#NULL!	#NULL!	#NULL!	#NULL!	#NULL!	#NULL!	#NULL!	#NULL!	#NULL!	512	517	1	2	8	2	8	8	2	8	1	8	2	8	1	1	2	2
A957915901	A9579159	2011	1	1	1	A957	1	34	#NULL!	3	3	3	2	7940.22	10096.9	#NULL!	#NULL!	#NULL!	15907	20572.1	#NULL!	#NULL!	#NULL!	#NULL!	#NULL!	#NULL!	#NULL!	#NULL!	#NULL!	#NULL!	#NULL!	512	517	1	1	2	8	8	8	2	8	1	8	2	8	1	2	2	2
A957915902	A9579159	2011	1	1	1	A957	2	32	#NULL!	3	3	4	1	7940.22	7951.94	#NULL!	#NULL!	#NULL!	12686.2	14426.4	#NULL!	#NULL!	#NULL!	#NULL!	#NULL!	#NULL!	#NULL!	#NULL!	#NULL!	#NULL!	#NULL!	512	517	1	1	2	8	8	8	1	2	1	8	2	8	2	8	8	8
A957915903	A9579159	2011	1	1	1	A957	1	3	38	3	3	1	#NULL!	7940.22	4513.45	#NULL!	#NULL!	#NULL!	6692.67	8451.52	#NULL!	#NULL!	#NULL!	#NULL!	#NULL!	#NULL!	#NULL!	#NULL!	#NULL!	#NULL!	#NULL!	512	517	1	8	8	8	8	8	8	8	8	8	8	8	8	8	8	8
A957915905	A9579159	2011	1	1	1	A957	1	28	#NULL!	3	3	4	1	7940.22	14709.4	#NULL!	#NULL!	#NULL!	#NULL!	#NULL!	#NULL!	#NULL!	#NULL!	#NULL!	#NULL!	#NULL!	#NULL!	#NULL!	#NULL!	#NULL!	#NULL!	512	517	1	2	8	8	8	8	2	8	1	8	2	8	2	8	8	8
A957916401	A9579164	2011	1	1	1	A957	1	31	#NULL!	4	4	3	3	7940.22	10096.9	18875.3	#NULL!	#NULL!	10604.6	20456.2	#NULL!	#NULL!	24447.9	#NULL!	#NULL!	#NULL!	#NULL!	#NULL!	#NULL!	#NULL!	#NULL!	512	517	1	2	8	8	8	8	2	8	1	8	1	1	2	8	8	8
A957916802	A9579168	2011	1	1	1	A957	2	31	#NULL!	4	4	4	2	7940.22	7951.94	30384.5	#NULL!	#NULL!	8457.45	10819.8	#NULL!	#NULL!	31845.8	#NULL!	#NULL!	#NULL!	#NULL!	#NULL!	#NULL!	#NULL!	#NULL!	512	517	1	2	8	8	8	8	2	8	1	8	2	8	2	8	8	8
A957916803	A9579168	2011	1	1	1	A957	1	2	25	4	4	1	#NULL!	7940.22	4513.45	#NULL!	#NULL!	#NULL!	4461.78	6338.64	#NULL!	#NULL!	#NULL!	#NULL!	#NULL!	#NULL!	#NULL!	#NULL!	#NULL!	#NULL!	#NULL!	512	517	1	8	8	8	8	8	8	8	8	8	8	8	8	8	8	8
A957917501	A9579175	2011	1	1	1	A957	1	33	#NULL!	4	4	2	3	7940.22	10096.9	#NULL!	#NULL!	#NULL!	#NULL!	#NULL!	#NULL!	#NULL!	#NULL!	#NULL!	#NULL!	#NULL!	#NULL!	#NULL!	#NULL!	#NULL!	#NULL!	512	517	1	2	8	8	8	8	2	8	1	8	2	8	2	8	8	8
A957917502	A9579175	2011	1	1	1	A957	2	30	#NULL!	4	4	3	7	7940.22	7951.94	#NULL!	#NULL!	#NULL!	#NULL!	#NULL!	#NULL!	#NULL!	#NULL!	#NULL!	#NULL!	#NULL!	#NULL!	#NULL!	#NULL!	#NULL!	#NULL!	512	517	1	2	8	8	8	8	2	8	1	8	2	8	1	1	2	2
A957917503	A9579175	2011	1	1	1	A957	2	1	17	4	4	1	#NULL!	7940.22	4195.49	#NULL!	#NULL!	#NULL!	#NULL!	#NULL!	#NULL!	#NULL!	#NULL!	#NULL!	#NULL!	#NULL!	#NULL!	#NULL!	#NULL!	#NULL!	#NULL!	512	517	1	8	8	8	8	8	8	8	8	8	8	8	8	8	8	8
A957918001	A9579180	2011	1	1	1	A957	2	43	#NULL!	1	1	4	7	7940.22	8294.9	#NULL!	11567.4	#NULL!	#NULL!	#NULL!	#NULL!	#NULL!	#NULL!	#NULL!	#NULL!	#NULL!	#NULL!	#NULL!	#NULL!	#NULL!	#NULL!	512	517	1	1	2	2	8	8	2	8	1	8	2	8	1	1	2	1
A957918601	A9579186	2011	1	1	1	A957	2	39	#NULL!	3	3	4	1	7940.22	6688.68	#NULL!	#NULL!	#NULL!	7018.8	8215.41	#NULL!	#NULL!	#NULL!	#NULL!	#NULL!	#NULL!	#NULL!	#NULL!	#NULL!	#NULL!	#NULL!	512	517	1	2	8	8	8	8	2	8	1	8	2	8	2	8	8	8
A957918602	A9579186	2011	1	1	1	A957	1	45	#NULL!	3	3	4	7	7940.22	11343.2	37245.7	17022.6	#NULL!	12680.1	18729.7	23058.8	20624.2	44933.3	29206.3	#NULL!	#NULL!	#NULL!	#NULL!	#NULL!	#NULL!	#NULL!	512	517	1	2	8	2	8	8	2	8	1	8	2	8	2	8	8	8
A957921002	A9579210	2011	1	1	1	A957	2	40	#NULL!	4	4	4	2	7940.22	12442.3	#NULL!	11567.4	#NULL!	8753.41	12137.4	#NULL!	11133.4	#NULL!	#NULL!	#NULL!	#NULL!	#NULL!	#NULL!	#NULL!	#NULL!	#NULL!	512	517	1	2	8	9	9	9	2	8	1	8	2	8	2	8	8	8
A957921003	A9579210	2011	1	1	1	A957	1	11	#NULL!	4	4	1	#NULL!	7940.22	8213.06	34305.5	#NULL!	#NULL!	5619.42	11513.7	#NULL!	#NULL!	19329.5	#NULL!	#NULL!	#NULL!	#NULL!	#NULL!	#NULL!	#NULL!	#NULL!	512	517	1	2	8	8	8	8	8	8	8	8	8	8	2	8	8	8
A957921004	A9579210	2011	1	1	1	A957	2	68	#NULL!	4	4	1	7	7940.22	6915.21	28112.4	5242.36	#NULL!	6678.15	5793.63	31843.6	5936.23	20111.9	33732.9	#NULL!	#NULL!	#NULL!	#NULL!	#NULL!	#NULL!	#NULL!	512	517	1	2	8	2	8	8	2	8	2	3	1	1	2	8	8	8
A957921101	A9579211	2011	1	1	1	A957	2	60	#NULL!	4	4	2	7	7940.22	9762.43	#NULL!	10536.3	#NULL!	5157.09	7085.56	#NULL!	11012.2	#NULL!	#NULL!	#NULL!	#NULL!	#NULL!	#NULL!	#NULL!	#NULL!	#NULL!	512	517	1	2	8	2	8	8	2	8	1	8	2	8	2	8	8	8
A957921103	A9579211	2011	1	1	1	A957	2	40	#NULL!	4	4	4	7	7940.22	16589.8	57202.9	#NULL!	#NULL!	8753.41	13654.6	#NULL!	#NULL!	56882.6	#NULL!	#NULL!	#NULL!	#NULL!	#NULL!	#NULL!	#NULL!	#NULL!	512	517	1	2	8	2	8	8	2	8	1	8	2	8	1	1	2	1
A957921104	A9579211	2011	1	1	1	A957	2	9	#NULL!	4	4	1	#NULL!	7940.22	10434.1	#NULL!	#NULL!	#NULL!	5677.72	10718.4	#NULL!	#NULL!	#NULL!	#NULL!	#NULL!	#NULL!	#NULL!	#NULL!	#NULL!	#NULL!	#NULL!	512	517	1	2	8	8	8	8	8	8	8	8	8	8	2	8	8	8
A957921105	A9579211	2011	1	1	1	A957	2	7	#NULL!	4	4	1	#NULL!	7940.22	10434.1	#NULL!	#NULL!	#NULL!	5677.72	10718.4	#NULL!	#NULL!	#NULL!	#NULL!	#NULL!	#NULL!	#NULL!	#NULL!	#NULL!	#NULL!	#NULL!	512	517	1	2	8	8	8	8	8	8	8	8	8	8	2	8	8	8
A957921501	A9579215	2011	1	1	1	A957	2	69	#NULL!	1	1	2	7	7940.22	4610.14	9370.81	#NULL!	#NULL!	#NULL!	#NULL!	#NULL!	#NULL!	#NULL!	#NULL!	#NULL!	#NULL!	#NULL!	#NULL!	#NULL!	#NULL!	#NULL!	512	517	1	2	8	2	8	8	2	8	2	3	2	8	2	8	8	8
A957922703	A9579227	2011	1	1	1	A957	1	21	#NULL!	3	3	3	3	7940.22	19256.1	#NULL!	#NULL!	#NULL!	16357.4	23766.3	#NULL!	#NULL!	#NULL!	#NULL!	#NULL!	#NULL!	#NULL!	#NULL!	#NULL!	#NULL!	#NULL!	512	517	1	1	2	8	8	8	2	8	1	8	2	8	1	1	2	2
A957923204	A9579232	2011	1	1	1	A957	2	34	#NULL!	2	3	4	7	7940.22	18044.1	#NULL!	#NULL!	#NULL!	#NULL!	#NULL!	#NULL!	#NULL!	#NULL!	#NULL!	#NULL!	#NULL!	#NULL!	#NULL!	#NULL!	#NULL!	#NULL!	512	517	1	2	8	8	8	8	2	8	1	8	2	8	2	8	8	8
A957923901	A9579239	2011	1	1	1	A957	2	36	#NULL!	3	3	4	1	7940.22	6688.68	#NULL!	#NULL!	#NULL!	7018.8	8215.41	#NULL!	#NULL!	#NULL!	#NULL!	#NULL!	#NULL!	#NULL!	#NULL!	#NULL!	#NULL!	#NULL!	512	517	1	2	8	8	8	8	2	8	1	8	2	8	1	1	1	1
A957924401	A9579244	2011	1	1	1	A957	2	54	#NULL!	4	4	2	7	7940.22	6120.97	28363.1	7752.6	#NULL!	5916.17	6498.04	19552.5	8055.16	28078.7	20488.6	#NULL!	#NULL!	#NULL!	#NULL!	#NULL!	#NULL!	#NULL!	512	517	1	2	8	2	8	8	2	8	1	8	2	8	2	8	8	8
A957924402	A9579244	2011	1	1	1	A957	1	53	#NULL!	4	4	3	2	7940.22	9902.67	29694.3	11921.7	#NULL!	11487.2	12658.2	19878.8	14428.2	32105.6	23044	#NULL!	#NULL!	#NULL!	#NULL!	#NULL!	#NULL!	#NULL!	512	517	1	2	8	2	8	8	2	8	1	8	2	8	1	1	1	1
A957924403	A9579244	2011	1	1	1	A957	2	31	#NULL!	4	4	4	1	7940.22	7951.94	#NULL!	#NULL!	#NULL!	8457.45	10819.8	#NULL!	#NULL!	#NULL!	#NULL!	#NULL!	#NULL!	#NULL!	#NULL!	#NULL!	#NULL!	#NULL!	512	517	1	2	8	8	8	8	2	8	1	8	2	8	2	8	8	8
A957924404	A9579244	2011	1	1	1	A957	2	29	#NULL!	4	4	4	2	7940.22	13026.4	#NULL!	#NULL!	#NULL!	12316.6	12886.5	#NULL!	#NULL!	#NULL!	#NULL!	#NULL!	#NULL!	#NULL!	#NULL!	#NULL!	#NULL!	#NULL!	512	517	1	1	1	8	8	8	1	2	1	8	2	8	1	1	1	1
A957925101	A9579251	2011	1	1	1	A957	1	31	#NULL!	3	3	4	1	7940.22	10096.9	#NULL!	#NULL!	#NULL!	10604.6	20456.2	#NULL!	#NULL!	#NULL!	#NULL!	#NULL!	#NULL!	#NULL!	#NULL!	#NULL!	#NULL!	#NULL!	512	517	1	2	8	8	8	8	2	8	1	8	2	8	2	8	8	8
A957925102	A9579251	2011	1	1	1	A957	2	31	#NULL!	3	3	4	1	7940.22	7951.94	#NULL!	#NULL!	#NULL!	8457.45	10819.8	#NULL!	#NULL!	#NULL!	#NULL!	#NULL!	#NULL!	#NULL!	#NULL!	#NULL!	#NULL!	#NULL!	512	517	1	2	8	8	8	8	2	8	1	8	2	8	2	8	8	8
A957938301	A9579383	2011	1	1	1	A957	1	30	#NULL!	4	4	4	1	7940.22	10096.9	#NULL!	#NULL!	#NULL!	10604.6	20456.2	#NULL!	#NULL!	#NULL!	#NULL!	#NULL!	#NULL!	#NULL!	#NULL!	#NULL!	#NULL!	#NULL!	512	517	1	2	8	8	8	8	2	8	1	8	1	1	2	8	8	8
A957938302	A9579383	2011	1	1	1	A957	1	26	#NULL!	4	4	4	2	7940.22	14709.4	40843.1	#NULL!	#NULL!	19549.1	22424	#NULL!	#NULL!	47820.2	#NULL!	#NULL!	#NULL!	#NULL!	#NULL!	#NULL!	#NULL!	#NULL!	512	517	1	1	9	8	8	8	2	8	1	8	2	8	1	1	2	2
A957938303	A9579383	2011	1	1	1	A957	1	32	#NULL!	4	4	4	1	7940.22	10096.9	#NULL!	#NULL!	#NULL!	10604.6	20456.2	#NULL!	#NULL!	#NULL!	#NULL!	#NULL!	#NULL!	#NULL!	#NULL!	#NULL!	#NULL!	#NULL!	512	517	1	2	8	8	8	8	1	2	1	8	2	8	1	2	2	2
A958929501	A9589295	2011	1	1	1	A958	1	87	#NULL!	3	2	3	7	1579.24	878.74	#NULL!	#NULL!	#NULL!	863.363	936.181	#NULL!	#NULL!	#NULL!	#NULL!	#NULL!	#NULL!	#NULL!	#NULL!	#NULL!	#NULL!	#NULL!	512	517	1	2	8	2	8	8	2	8	2	3	2	8	1	2	1	1
A958929502	A9589295	2011	1	1	1	A958	2	82	#NULL!	3	2	1	3	1579.24	911.351	#NULL!	#NULL!	#NULL!	905.66	906.899	#NULL!	#NULL!	#NULL!	#NULL!	#NULL!	#NULL!	#NULL!	#NULL!	#NULL!	#NULL!	#NULL!	512	517	1	2	8	1	2	2	2	8	1	8	2	8	2	8	8	8
A958929601	A9589296	2011	1	1	1	A958	1	49	#NULL!	4	4	4	3	1579.24	2374.8	7797.7	#NULL!	#NULL!	2654.68	3921.22	#NULL!	#NULL!	7055.38	#NULL!	#NULL!	#NULL!	#NULL!	#NULL!	#NULL!	#NULL!	#NULL!	512	517	1	2	8	2	8	8	2	8	1	8	1	1	2	8	8	8
A958929602	A9589296	2011	1	1	1	A958	2	48	#NULL!	4	4	4	7	1579.24	1602.2	#NULL!	4338.11	#NULL!	1505.49	1854.86	#NULL!	4564.81	#NULL!	#NULL!	#NULL!	#NULL!	#NULL!	#NULL!	#NULL!	#NULL!	#NULL!	512	517	1	2	8	2	8	8	2	8	1	8	2	8	2	8	8	8
A958929603	A9589296	2011	1	1	1	A958	1	18	#NULL!	4	4	2	7	1579.24	2031.45	6990.46	#NULL!	#NULL!	2271.6	3276.16	#NULL!	#NULL!	4934.34	#NULL!	#NULL!	#NULL!	#NULL!	#NULL!	#NULL!	#NULL!	#NULL!	512	517	1	2	8	8	8	8	8	8	1	8	2	8	2	8	8	8
A958931402	A9589314	2011	1	1	1	A958	2	48	#NULL!	4	4	#NULL!	#NULL!	1579.24	1602.2	#NULL!	#NULL!	#NULL!	1505.49	1854.86	#NULL!	#NULL!	#NULL!	#NULL!	#NULL!	#NULL!	#NULL!	#NULL!	#NULL!	#NULL!	#NULL!	512	517	1	2	8	1	2	2	2	8	1	8	2	8	2	8	8	8
A958931901	A9589319	2011	1	1	1	A958	1	30	#NULL!	4	4	4	2	1579.24	2113.86	3951.71	#NULL!	#NULL!	#NULL!	#NULL!	#NULL!	#NULL!	#NULL!	#NULL!	#NULL!	#NULL!	#NULL!	#NULL!	#NULL!	#NULL!	#NULL!	512	517	1	1	2	8	8	8	2	8	1	8	2	8	1	1	1	1
A958932102	A9589321	2011	1	1	1	A958	1	30	#NULL!	2	2	3	5	1579.24	2113.86	#NULL!	#NULL!	#NULL!	2220.17	4282.69	#NULL!	#NULL!	#NULL!	#NULL!	#NULL!	#NULL!	#NULL!	#NULL!	#NULL!	#NULL!	#NULL!	512	517	1	2	8	8	8	8	2	8	1	8	2	8	2	8	8	8
A958932401	A9589324	2011	1	1	1	A958	2	53	#NULL!	2	2	3	3	1579.24	1281.48	2969.03	1623.07	#NULL!	1238.6	1360.42	4093.49	1686.42	2939.26	4289.47	#NULL!	#NULL!	#NULL!	#NULL!	#NULL!	#NULL!	#NULL!	512	517	1	2	8	2	8	8	2	8	1	8	2	8	1	1	1	1
A958933801	A9589338	2011	1	1	1	A958	2	47	#NULL!	4	4	3	6	1579.24	1602.2	3003.96	2169.06	#NULL!	1505.49	3709.72	4178.65	2282.41	5853.49	4375.61	#NULL!	#NULL!	#NULL!	#NULL!	#NULL!	#NULL!	#NULL!	512	517	1	2	8	2	8	8	2	8	1	8	2	8	2	8	8	8
A958934901	A9589349	2011	1	1	1	A958	1	53	#NULL!	4	4	3	3	1579.24	2073.21	4662.56	2495.91	#NULL!	2404.94	2650.11	8323.58	3020.66	5041.19	9648.92	#NULL!	#NULL!	#NULL!	#NULL!	#NULL!	#NULL!	#NULL!	512	517	1	2	8	2	8	8	2	8	1	8	1	1	2	8	8	8
A958934902	A9589349	2011	1	1	1	A958	2	52	#NULL!	4	4	3	3	1579.24	1281.48	#NULL!	1623.07	#NULL!	1238.6	1360.42	#NULL!	1686.42	#NULL!	#NULL!	#NULL!	#NULL!	#NULL!	#NULL!	#NULL!	#NULL!	#NULL!	512	517	1	2	8	1	1	2	2	8	1	8	1	1	2	8	8	8
A958934903	A9589349	2011	1	1	1	A958	1	29	#NULL!	4	4	3	2	1579.24	3079.54	4275.42	#NULL!	#NULL!	4135.64	5341.43	#NULL!	#NULL!	5005.78	#NULL!	#NULL!	#NULL!	#NULL!	#NULL!	#NULL!	#NULL!	#NULL!	512	517	1	2	8	8	8	8	2	8	2	3	1	1	2	8	8	8
A958935401	A9589354	2011	1	1	1	A958	1	47	#NULL!	2	2	3	3	1579.24	2374.8	#NULL!	3563.82	#NULL!	2654.68	3921.22	#NULL!	4317.85	#NULL!	#NULL!	#NULL!	#NULL!	#NULL!	#NULL!	#NULL!	#NULL!	#NULL!	512	517	1	2	8	2	8	8	2	8	2	3	2	8	1	1	1	1
A958936401	A9589364	2011	1	1	1	A958	2	71	#NULL!	2	1	1	3	1579.24	863.81	#NULL!	1995.19	#NULL!	829.958	906.899	#NULL!	2081.92	#NULL!	#NULL!	#NULL!	#NULL!	#NULL!	#NULL!	#NULL!	#NULL!	#NULL!	512	517	1	2	8	1	2	2	2	8	2	3	2	8	2	8	8	8
A958936801	A9589368	2011	1	1	1	A958	1	74	#NULL!	2	1	1	1	1579.24	1283.95	#NULL!	1648.71	#NULL!	1917.41	936.181	#NULL!	1720.34	#NULL!	#NULL!	#NULL!	#NULL!	#NULL!	#NULL!	#NULL!	#NULL!	#NULL!	512	517	1	2	8	2	8	8	2	8	2	3	2	8	2	8	8	8
A958936901	A9589369	2011	1	1	1	A958	2	67	#NULL!	1	1	3	7	1579.24	965.173	1961.86	1097.53	#NULL!	1398.13	909.709	3333.37	1242.8	2105.3	3531.14	#NULL!	#NULL!	#NULL!	#NULL!	#NULL!	#NULL!	#NULL!	512	517	1	2	8	1	2	2	2	8	1	8	2	8	2	8	8	8
A958937202	A9589372	2011	1	1	1	A958	2	78	#NULL!	2	1	1	7	1579.24	911.351	#NULL!	#NULL!	#NULL!	905.66	1360.35	#NULL!	#NULL!	#NULL!	#NULL!	#NULL!	#NULL!	#NULL!	#NULL!	#NULL!	#NULL!	#NULL!	512	517	1	2	8	2	8	8	2	8	1	8	2	8	2	8	8	8
A958937601	A9589376	2011	1	1	1	A958	2	70	#NULL!	2	1	1	7	1579.24	863.81	#NULL!	1995.19	#NULL!	829.958	906.899	#NULL!	2081.92	#NULL!	#NULL!	#NULL!	#NULL!	#NULL!	#NULL!	#NULL!	#NULL!	#NULL!	512	517	1	2	8	2	8	8	2	8	1	8	2	8	2	8	8	8
A958937701	A9589377	2011	1	1	1	A958	2	71	#NULL!	4	3	1	7	1579.24	863.81	#NULL!	1995.19	#NULL!	829.958	906.899	#NULL!	2081.92	#NULL!	#NULL!	#NULL!	#NULL!	#NULL!	#NULL!	#NULL!	#NULL!	#NULL!	512	517	1	2	8	1	2	2	2	8	2	3	2	8	2	8	8	8
A958937702	A9589377	2011	1	1	1	A958	2	48	#NULL!	3	3	4	7	1579.24	1602.2	6007.93	2169.06	#NULL!	1505.49	1854.86	8357.3	2282.41	11707	8751.22	#NULL!	#NULL!	#NULL!	#NULL!	#NULL!	#NULL!	#NULL!	512	517	1	2	8	2	8	8	2	8	1	8	2	8	2	8	8	8
A958937703	A9589377	2011	1	1	1	A958	1	18	#NULL!	3	3	3	6	1579.24	2031.45	#NULL!	#NULL!	#NULL!	2271.6	3276.16	#NULL!	#NULL!	#NULL!	#NULL!	#NULL!	#NULL!	#NULL!	#NULL!	#NULL!	#NULL!	#NULL!	512	517	1	2	8	8	8	8	8	8	1	8	2	8	2	8	8	8
A958938001	A9589380	2011	1	1	1	A958	1	63	#NULL!	3	3	3	5	1579.24	1039.04	7252.01	2023.86	#NULL!	1188.15	1105.95	7923.5	2268.38	7427.03	8783.81	#NULL!	#NULL!	#NULL!	#NULL!	#NULL!	#NULL!	#NULL!	512	517	1	2	8	2	8	8	2	8	2	3	1	2	2	8	8	8
A958938004	A9589380	2011	1	1	1	A958	1	83	#NULL!	4	3	#NULL!	#NULL!	1579.24	878.74	#NULL!	#NULL!	#NULL!	863.363	936.181	#NULL!	#NULL!	#NULL!	#NULL!	#NULL!	#NULL!	#NULL!	#NULL!	#NULL!	#NULL!	#NULL!	512	517	1	2	8	1	2	1	2	8	3	1	1	2	2	8	8	8
A959927101	A9599271	2011	1	1	2	A959	1	40	#NULL!	4	4	4	1	3176.9	4570.82	11050.6	5071.6	#NULL!	5039.99	6349.65	7552.86	6633.47	12291	9302.21	#NULL!	#NULL!	#NULL!	#NULL!	#NULL!	#NULL!	#NULL!	501	501	1	2	8	2	8	8	2	8	1	8	2	8	2	8	8	8
A959927102	A9599271	2011	1	1	2	A959	2	37	#NULL!	4	4	4	2	3176.9	2341.64	#NULL!	#NULL!	#NULL!	2457.21	2876.13	#NULL!	#NULL!	#NULL!	#NULL!	#NULL!	#NULL!	#NULL!	#NULL!	#NULL!	#NULL!	#NULL!	501	501	1	2	8	8	8	8	2	8	1	8	2	8	2	8	8	8
A959927103	A9599271	2011	1	1	2	A959	2	2	27	4	4	1	#NULL!	3176.9	1468.8	#NULL!	#NULL!	#NULL!	1410.27	2250.41	#NULL!	#NULL!	#NULL!	#NULL!	#NULL!	#NULL!	#NULL!	#NULL!	#NULL!	#NULL!	#NULL!	501	501	1	8	8	8	8	8	8	8	8	8	8	8	8	8	8	8
A959927701	A9599277	2011	1	1	2	A959	2	53	#NULL!	4	4	3	6	3176.9	2142.89	4964.81	2714.1	#NULL!	2071.19	2274.89	6845.13	2820.03	4915.03	7172.86	#NULL!	#NULL!	#NULL!	#NULL!	#NULL!	#NULL!	#NULL!	501	501	1	2	8	2	8	8	1	2	1	8	1	2	2	8	8	8
A959928801	A9599288	2011	1	1	2	A959	2	45	#NULL!	3	3	4	7	3176.9	2679.2	10046.5	#NULL!	#NULL!	2517.47	4135.59	#NULL!	#NULL!	9788.2	#NULL!	#NULL!	#NULL!	#NULL!	#NULL!	#NULL!	#NULL!	#NULL!	501	501	1	2	8	2	8	8	2	8	1	8	1	1	2	8	8	8
A959928802	A9599288	2011	1	1	2	A959	1	49	#NULL!	3	3	4	1	3176.9	3971.14	#NULL!	11918.8	#NULL!	4439.16	8742.76	#NULL!	14440.6	#NULL!	#NULL!	#NULL!	#NULL!	#NULL!	#NULL!	#NULL!	#NULL!	#NULL!	501	501	1	2	8	2	8	8	2	8	1	8	2	8	2	8	8	8
A959928803	A9599288	2011	1	1	2	A959	1	18	#NULL!	3	3	2	7	3176.9	3397	11689.5	#NULL!	#NULL!	3798.56	7304.53	#NULL!	#NULL!	11001.6	#NULL!	#NULL!	#NULL!	#NULL!	#NULL!	#NULL!	#NULL!	#NULL!	501	501	1	2	8	8	8	8	8	8	1	8	2	8	2	8	8	8
A959930001	A9599300	2011	1	1	2	A959	1	32	#NULL!	4	4	4	2	3176.9	3534.8	#NULL!	#NULL!	#NULL!	3712.57	7161.51	#NULL!	#NULL!	#NULL!	#NULL!	#NULL!	#NULL!	#NULL!	#NULL!	#NULL!	#NULL!	#NULL!	501	501	1	2	8	8	8	8	2	8	3	3	1	1	1	1	1	1
A959930002	A9599300	2011	1	1	2	A959	2	32	#NULL!	4	4	4	7	3176.9	2783.89	10637.3	#NULL!	#NULL!	2960.86	3787.9	#NULL!	#NULL!	11148.9	#NULL!	#NULL!	#NULL!	#NULL!	#NULL!	#NULL!	#NULL!	#NULL!	501	501	1	2	8	8	8	8	2	8	1	8	2	8	1	1	1	1
A959930003	A9599300	2011	1	1	2	A959	2	3	41	4	4	1	#NULL!	3176.9	1468.8	#NULL!	#NULL!	#NULL!	1410.27	2250.41	#NULL!	#NULL!	#NULL!	#NULL!	#NULL!	#NULL!	#NULL!	#NULL!	#NULL!	#NULL!	#NULL!	501	501	1	8	8	8	8	8	8	8	8	8	8	8	8	8	8	8
A959931501	A9599315	2011	1	1	2	A959	1	33	#NULL!	3	3	4	2	3176.9	3534.8	6608.06	#NULL!	#NULL!	3712.57	7161.51	#NULL!	#NULL!	8558.94	#NULL!	#NULL!	#NULL!	#NULL!	#NULL!	#NULL!	#NULL!	#NULL!	501	501	1	2	8	8	8	8	2	8	1	8	1	2	2	8	8	8
A959931502	A9599315	2011	1	1	2	A959	2	31	#NULL!	3	3	4	7	3176.9	2783.89	5318.64	#NULL!	#NULL!	2960.86	3787.9	#NULL!	#NULL!	5574.44	#NULL!	#NULL!	#NULL!	#NULL!	#NULL!	#NULL!	#NULL!	#NULL!	501	501	1	2	8	8	8	8	2	8	1	8	2	8	1	1	2	1
A959931503	A9599315	2011	1	1	2	A959	1	4	53	3	3	1	#NULL!	3176.9	1580.11	#NULL!	#NULL!	#NULL!	1562.02	2219.09	#NULL!	#NULL!	#NULL!	#NULL!	#NULL!	#NULL!	#NULL!	#NULL!	#NULL!	#NULL!	#NULL!	501	501	1	2	8	8	8	8	8	8	8	8	8	8	8	8	8	8
A959931801	A9599318	2011	1	1	2	A959	1	62	#NULL!	3	3	4	7	3176.9	1737.49	3031.7	2256.2	#NULL!	1986.82	1849.37	4416.56	2528.79	3104.87	4896.09	#NULL!	#NULL!	#NULL!	#NULL!	#NULL!	#NULL!	#NULL!	501	501	1	2	8	2	8	8	2	8	2	3	1	1	2	8	8	8
A959931802	A9599318	2011	1	1	2	A959	1	27	#NULL!	3	3	4	1	3176.9	5149.62	4766.24	#NULL!	#NULL!	6915.62	8931.93	#NULL!	#NULL!	5580.44	#NULL!	#NULL!	#NULL!	#NULL!	#NULL!	#NULL!	#NULL!	#NULL!	501	501	1	2	8	8	8	8	1	2	1	8	1	1	1	2	2	2
A959932401	A9599324	2011	1	1	2	A959	1	47	#NULL!	4	4	4	5	3176.9	3971.14	13039.3	5959.42	#NULL!	4439.16	6557.07	16145.3	7220.31	15730.7	20449.6	#NULL!	#NULL!	#NULL!	#NULL!	#NULL!	#NULL!	#NULL!	501	501	1	2	8	2	8	8	2	8	1	8	1	1	1	1	1	1
A959932402	A9599324	2011	1	1	2	A959	2	43	#NULL!	4	4	4	1	3176.9	2903.96	#NULL!	4049.63	#NULL!	3064.48	3186.89	#NULL!	3897.69	#NULL!	#NULL!	#NULL!	#NULL!	#NULL!	#NULL!	#NULL!	#NULL!	#NULL!	501	501	1	2	8	1	3	2	2	8	1	8	1	1	2	8	8	8
A959932403	A9599324	2011	1	1	2	A959	2	15	#NULL!	4	4	2	7	3176.9	3620.7	#NULL!	#NULL!	#NULL!	3893.62	4840.15	#NULL!	#NULL!	#NULL!	#NULL!	#NULL!	#NULL!	#NULL!	#NULL!	#NULL!	#NULL!	#NULL!	501	501	1	2	8	8	8	8	8	8	1	8	2	8	2	8	8	8
A959932404	A9599324	2011	1	1	2	A959	1	14	#NULL!	4	4	1	#NULL!	3176.9	1916.87	8006.65	#NULL!	#NULL!	1967.3	3023.12	#NULL!	#NULL!	6767.05	#NULL!	#NULL!	#NULL!	#NULL!	#NULL!	#NULL!	#NULL!	#NULL!	501	501	1	2	8	8	8	8	8	8	1	8	2	8	2	8	8	8
A959933002	A9599330	2011	1	1	2	A959	2	82	#NULL!	4	3	3	7	3176.9	1523.96	#NULL!	#NULL!	#NULL!	1514.44	1516.52	#NULL!	#NULL!	#NULL!	#NULL!	#NULL!	#NULL!	#NULL!	#NULL!	#NULL!	#NULL!	#NULL!	501	501	1	2	8	2	8	8	2	8	1	8	2	8	1	1	1	1
A959934101	A9599341	2011	1	1	2	A959	1	73	#NULL!	4	3	4	7	3176.9	3220.54	24589.2	2756.97	#NULL!	4809.45	2348.22	43455.1	2876.75	25068.8	47115	#NULL!	#NULL!	#NULL!	#NULL!	#NULL!	#NULL!	#NULL!	501	501	1	2	8	2	8	8	2	8	1	8	2	8	1	2	1	2
A959934102	A9599341	2011	1	1	2	A959	2	62	#NULL!	3	3	3	7	3176.9	2563.29	4617.59	1844.33	#NULL!	2708.17	2480.58	4367.5	1927.63	4703.83	4551.52	#NULL!	#NULL!	#NULL!	#NULL!	#NULL!	#NULL!	#NULL!	501	501	1	2	8	2	8	8	1	2	1	8	2	8	2	8	8	8
A959934602	A9599346	2011	1	1	2	A959	2	38	#NULL!	4	4	4	2	3176.9	4683.27	#NULL!	#NULL!	#NULL!	2457.21	4314.19	#NULL!	#NULL!	#NULL!	#NULL!	#NULL!	#NULL!	#NULL!	#NULL!	#NULL!	#NULL!	#NULL!	501	501	1	2	8	8	8	8	2	8	1	8	2	8	1	1	1	1
A959934603	A9599346	2011	1	1	2	A959	2	1	14	4	4	1	#NULL!	3176.9	2937.59	#NULL!	#NULL!	#NULL!	1410.27	3375.62	#NULL!	#NULL!	#NULL!	#NULL!	#NULL!	#NULL!	#NULL!	#NULL!	#NULL!	#NULL!	#NULL!	501	501	1	8	8	8	8	8	8	8	8	8	8	8	8	8	8	8
A959936401	A9599364	2011	1	1	2	A959	1	51	#NULL!	4	4	4	1	3176.9	3466.82	7796.74	4173.65	#NULL!	5362.06	5908.68	6959.35	5051.15	11239.8	8067.46	#NULL!	#NULL!	#NULL!	#NULL!	#NULL!	#NULL!	#NULL!	501	501	1	2	8	1	2	2	2	8	2	3	1	2	1	1	1	1
A959936402	A9599364	2011	1	1	2	A959	2	47	#NULL!	4	4	3	7	3176.9	2679.2	7534.85	3627.1	#NULL!	3356.63	4135.59	6987.54	3816.64	9788.2	7316.89	#NULL!	#NULL!	#NULL!	#NULL!	#NULL!	#NULL!	#NULL!	501	501	1	2	8	2	8	8	2	8	1	8	1	1	2	8	8	8
A959936403	A9599364	2011	1	1	2	A959	1	20	#NULL!	4	4	#NULL!	#NULL!	3176.9	4331.06	#NULL!	#NULL!	#NULL!	7635.41	11671.4	#NULL!	#NULL!	#NULL!	#NULL!	#NULL!	#NULL!	#NULL!	#NULL!	#NULL!	#NULL!	#NULL!	501	501	1	2	8	8	8	8	2	8	1	8	2	8	2	8	8	8
A959936901	A9599369	2011	1	1	2	A959	1	59	#NULL!	1	2	4	7	3176.9	5022.45	7247.57	6364.39	#NULL!	#NULL!	#NULL!	9706.9	#NULL!	#NULL!	#NULL!	#NULL!	#NULL!	#NULL!	#NULL!	#NULL!	#NULL!	#NULL!	501	501	1	2	8	1	2	2	2	8	2	3	2	8	2	8	8	8
A959936904	A9599369	2011	1	1	2	A959	1	21	#NULL!	2	2	3	7	3176.9	8662.12	9794.31	#NULL!	#NULL!	11453.1	23766.3	#NULL!	#NULL!	23024.2	#NULL!	#NULL!	#NULL!	#NULL!	#NULL!	#NULL!	#NULL!	#NULL!	501	501	1	2	8	8	8	8	2	8	1	8	2	8	1	1	1	1
A959937505	A9599375	2011	1	1	2	A959	2	86	#NULL!	#NULL!	#NULL!	1	7	3176.9	7619.81	#NULL!	#NULL!	#NULL!	7572.22	7582.59	#NULL!	#NULL!	#NULL!	#NULL!	#NULL!	#NULL!	#NULL!	#NULL!	#NULL!	#NULL!	#NULL!	501	501	1	9	9	2	8	8	2	8	2	3	1	2	2	8	8	8
A959937901	A9599379	2011	1	1	2	A959	1	82	#NULL!	4	3	4	7	3176.9	1469.43	#NULL!	#NULL!	#NULL!	1443.71	1565.48	#NULL!	#NULL!	#NULL!	#NULL!	#NULL!	#NULL!	#NULL!	#NULL!	#NULL!	#NULL!	#NULL!	501	501	1	2	8	2	8	8	2	8	4	3	1	1	2	8	8	8
A959937902	A9599379	2011	1	1	2	A959	2	73	#NULL!	4	3	4	7	3176.9	1444.46	#NULL!	6672.71	#NULL!	1387.86	1516.52	#NULL!	6962.79	#NULL!	#NULL!	#NULL!	#NULL!	#NULL!	#NULL!	#NULL!	#NULL!	#NULL!	501	501	1	2	8	2	8	8	2	8	2	3	2	8	2	8	8	8
A960930301	A9609303	2011	1	1	1	A960	1	54	#NULL!	4	4	3	7	6686.5	9902.67	29694.3	11921.7	#NULL!	11487.2	12658.2	39757.5	14428.2	32105.6	46088	#NULL!	#NULL!	#NULL!	#NULL!	#NULL!	#NULL!	#NULL!	512	517	1	2	8	2	8	8	2	8	1	8	1	1	2	8	8	8
A960930302	A9609303	2011	1	1	1	A960	2	48	#NULL!	4	4	3	7	6686.5	7652.91	#NULL!	10360.5	#NULL!	7190.94	8859.72	#NULL!	10901.9	#NULL!	#NULL!	#NULL!	#NULL!	#NULL!	#NULL!	#NULL!	#NULL!	#NULL!	512	517	1	2	8	2	8	8	2	8	1	8	2	8	2	8	8	8
A960930401	A9609304	2011	1	1	1	A960	1	48	#NULL!	2	2	2	6	6686.5	11343.2	37245.7	24490.4	#NULL!	12680.1	18729.7	46117.7	27179.2	44933.3	58412.5	#NULL!	#NULL!	#NULL!	#NULL!	#NULL!	#NULL!	#NULL!	512	517	1	2	8	2	8	8	2	8	1	8	2	8	1	2	1	1
A960930402	A9609304	2011	1	1	1	A960	2	45	#NULL!	2	2	3	3	6686.5	7652.91	#NULL!	#NULL!	#NULL!	7190.94	8859.72	#NULL!	#NULL!	#NULL!	#NULL!	#NULL!	#NULL!	#NULL!	#NULL!	#NULL!	#NULL!	#NULL!	512	517	1	2	8	2	8	8	2	8	1	8	2	8	1	1	1	1
A960930403	A9609304	2011	1	1	1	A960	2	17	#NULL!	2	2	2	7	6686.5	10342.2	#NULL!	#NULL!	#NULL!	11121.8	13825.5	#NULL!	#NULL!	#NULL!	#NULL!	#NULL!	#NULL!	#NULL!	#NULL!	#NULL!	#NULL!	#NULL!	512	517	1	2	8	8	8	8	8	8	1	8	2	8	2	8	8	8
A960930404	A9609304	2011	1	1	1	A960	2	10	#NULL!	2	2	1	#NULL!	6686.5	7775.37	26006.5	#NULL!	#NULL!	8260.97	9295.07	#NULL!	#NULL!	20297.5	#NULL!	#NULL!	#NULL!	#NULL!	#NULL!	#NULL!	#NULL!	#NULL!	512	517	1	2	8	8	8	8	8	8	8	8	8	8	2	8	8	8
A960930701	A9609307	2011	1	1	1	A960	1	61	#NULL!	3	3	1	3	6686.5	4962.99	#NULL!	12889.3	#NULL!	5675.17	5282.56	#NULL!	14446.5	#NULL!	#NULL!	#NULL!	#NULL!	#NULL!	#NULL!	#NULL!	#NULL!	#NULL!	512	517	1	2	8	2	8	8	2	8	1	8	2	8	2	8	8	8
A960930702	A9609307	2011	1	1	1	A960	2	54	#NULL!	3	3	1	7	6686.5	6120.97	#NULL!	#NULL!	#NULL!	5916.17	6498.04	#NULL!	#NULL!	#NULL!	#NULL!	#NULL!	#NULL!	#NULL!	#NULL!	#NULL!	#NULL!	#NULL!	512	517	1	2	8	2	8	8	2	8	1	8	2	8	2	8	8	8
A960930703	A9609307	2011	1	1	1	A960	1	25	#NULL!	3	3	3	7	6686.5	14709.4	40843.1	#NULL!	#NULL!	19549.1	22424	#NULL!	#NULL!	47820.2	#NULL!	#NULL!	#NULL!	#NULL!	#NULL!	#NULL!	#NULL!	#NULL!	512	517	1	2	8	8	8	8	2	8	1	8	2	8	1	1	2	2
A960931101	A9609311	2011	1	1	1	A960	1	60	#NULL!	3	3	1	7	6686.5	9925.97	#NULL!	12889.3	#NULL!	5675.17	15847.7	#NULL!	14446.5	#NULL!	#NULL!	#NULL!	#NULL!	#NULL!	#NULL!	#NULL!	#NULL!	#NULL!	512	517	1	2	8	1	2	2	2	8	1	8	2	8	2	8	8	8
A960931501	A9609315	2011	1	1	1	A960	2	73	#NULL!	2	1	2	7	6686.5	4125.99	#NULL!	9530.01	#NULL!	3964.29	4331.8	#NULL!	9944.3	#NULL!	#NULL!	#NULL!	#NULL!	#NULL!	#NULL!	#NULL!	#NULL!	#NULL!	512	517	1	2	8	2	8	8	2	8	1	8	2	8	2	8	8	8
A960931901	A9609319	2011	1	1	1	A960	2	41	#NULL!	1	2	#NULL!	#NULL!	6686.5	16589.8	#NULL!	#NULL!	#NULL!	#NULL!	#NULL!	#NULL!	#NULL!	#NULL!	#NULL!	#NULL!	#NULL!	#NULL!	#NULL!	#NULL!	#NULL!	#NULL!	512	517	1	2	8	2	8	8	2	8	1	8	2	8	2	8	8	8
A960932001	A9609320	2011	1	1	1	A960	1	78	#NULL!	2	1	3	5	6686.5	4197.3	#NULL!	#NULL!	#NULL!	4123.85	4471.66	#NULL!	#NULL!	#NULL!	#NULL!	#NULL!	#NULL!	#NULL!	#NULL!	#NULL!	#NULL!	#NULL!	512	517	1	2	8	2	8	8	2	8	1	8	2	8	2	8	8	8
A960932002	A9609320	2011	1	1	1	A960	2	75	#NULL!	3	1	1	7	6686.5	4353.06	#NULL!	19060	#NULL!	4325.88	4331.8	#NULL!	19888.6	#NULL!	#NULL!	#NULL!	#NULL!	#NULL!	#NULL!	#NULL!	#NULL!	#NULL!	512	517	1	2	8	1	2	2	1	2	2	3	2	8	1	2	1	1
A960932201	A9609322	2011	1	1	1	A960	1	67	#NULL!	1	1	2	7	6686.5	11389.9	22179	#NULL!	#NULL!	6903.17	14707.6	#NULL!	#NULL!	23283.2	#NULL!	#NULL!	#NULL!	#NULL!	#NULL!	#NULL!	#NULL!	#NULL!	512	517	1	2	8	2	8	8	2	8	1	8	2	8	2	8	8	8
A960932901	A9609329	2011	1	1	1	A960	1	49	#NULL!	4	4	1	5	6686.5	18140.2	#NULL!	24490.4	#NULL!	12680.1	20673.6	#NULL!	27179.2	#NULL!	#NULL!	#NULL!	#NULL!	#NULL!	#NULL!	#NULL!	#NULL!	#NULL!	512	517	1	2	8	2	8	8	2	8	2	3	2	8	2	8	8	8
A960933201	A9609332	2011	1	1	1	A960	1	57	#NULL!	2	3	1	5	6686.5	9564.13	#NULL!	9089.66	#NULL!	#NULL!	#NULL!	#NULL!	#NULL!	#NULL!	#NULL!	#NULL!	#NULL!	#NULL!	#NULL!	#NULL!	#NULL!	#NULL!	512	517	1	2	8	2	8	8	2	8	1	8	2	8	2	8	8	8
A960933202	A9609332	2011	1	1	1	A960	2	55	#NULL!	3	3	3	7	6686.5	6258.17	#NULL!	6280.59	#NULL!	5896.36	8294.44	#NULL!	12648.3	#NULL!	#NULL!	#NULL!	#NULL!	#NULL!	#NULL!	#NULL!	#NULL!	#NULL!	512	517	1	2	8	2	8	8	2	8	1	8	2	8	2	8	8	8
A960933203	A9609332	2011	1	1	1	A960	2	30	#NULL!	3	3	4	1	6686.5	10602.6	#NULL!	#NULL!	#NULL!	11276.6	16229.7	#NULL!	#NULL!	#NULL!	#NULL!	#NULL!	#NULL!	#NULL!	#NULL!	#NULL!	#NULL!	#NULL!	512	517	1	2	8	8	8	8	2	8	1	8	2	8	2	8	8	8
A960933205	A9609332	2011	1	1	1	A960	2	4	48	4	3	1	#NULL!	6686.5	5593.99	#NULL!	#NULL!	#NULL!	5371.07	9642.16	#NULL!	#NULL!	#NULL!	#NULL!	#NULL!	#NULL!	#NULL!	#NULL!	#NULL!	#NULL!	#NULL!	512	517	1	2	8	8	8	8	8	8	8	8	8	8	8	8	8	8
A960933206	A9609332	2011	1	1	1	A960	1	2	30	3	3	1	#NULL!	6686.5	6017.94	#NULL!	#NULL!	#NULL!	5949.04	9507.96	#NULL!	#NULL!	#NULL!	#NULL!	#NULL!	#NULL!	#NULL!	#NULL!	#NULL!	#NULL!	#NULL!	512	517	1	8	8	8	8	8	8	8	8	8	8	8	8	8	8	8
A960933501	A9609335	2011	1	1	1	A960	2	58	#NULL!	3	3	1	7	6686.5	9387.25	#NULL!	12561.2	#NULL!	4422.27	11059.3	#NULL!	12648.3	#NULL!	#NULL!	#NULL!	#NULL!	#NULL!	#NULL!	#NULL!	#NULL!	#NULL!	512	517	1	2	8	2	8	8	2	8	1	8	2	8	2	8	8	8
A960933701	A9609337	2011	1	1	1	A960	1	31	#NULL!	2	2	4	1	6686.5	10096.9	#NULL!	#NULL!	#NULL!	10604.6	20456.2	#NULL!	#NULL!	#NULL!	#NULL!	#NULL!	#NULL!	#NULL!	#NULL!	#NULL!	#NULL!	#NULL!	512	517	1	2	8	8	8	8	2	8	1	8	2	8	2	8	8	8
A960933702	A9609337	2011	1	1	1	A960	2	30	#NULL!	2	2	3	5	6686.5	7951.94	30384.5	#NULL!	#NULL!	8457.45	10819.8	#NULL!	#NULL!	31845.8	#NULL!	#NULL!	#NULL!	#NULL!	#NULL!	#NULL!	#NULL!	#NULL!	512	517	1	2	8	8	8	8	2	8	1	8	2	8	1	2	1	1
A960934403	A9609344	2011	1	1	1	A960	2	30	#NULL!	2	2	4	1	6686.5	18044.1	57223.9	#NULL!	#NULL!	14095.8	19418.5	#NULL!	#NULL!	63478.1	#NULL!	#NULL!	#NULL!	#NULL!	#NULL!	#NULL!	#NULL!	#NULL!	512	517	1	2	8	8	8	8	2	8	1	8	2	8	1	2	1	1
A960934405	A9609344	2011	1	1	1	A960	2	77	#NULL!	3	2	1	7	6686.5	10882.7	#NULL!	#NULL!	#NULL!	7209.8	10829.5	#NULL!	#NULL!	#NULL!	#NULL!	#NULL!	#NULL!	#NULL!	#NULL!	#NULL!	#NULL!	#NULL!	512	517	1	2	8	1	2	2	2	8	2	3	2	8	2	8	8	8
A960934801	A9609348	2011	1	1	1	A960	2	67	#NULL!	1	1	1	7	6686.5	4610.14	18741.6	#NULL!	#NULL!	13356.3	8690.44	#NULL!	#NULL!	20111.9	#NULL!	#NULL!	#NULL!	#NULL!	#NULL!	#NULL!	#NULL!	#NULL!	512	517	1	2	8	1	1	1	2	8	2	3	2	8	1	1	2	1
A960934802	A9609348	2011	1	1	1	A960	1	37	#NULL!	1	1	4	1	6686.5	11628.5	#NULL!	#NULL!	#NULL!	#NULL!	#NULL!	#NULL!	#NULL!	#NULL!	#NULL!	#NULL!	#NULL!	#NULL!	#NULL!	#NULL!	#NULL!	#NULL!	512	517	1	2	8	8	8	8	2	8	1	8	2	8	2	8	8	8
A960935701	A9609357	2011	1	1	1	A960	1	63	#NULL!	#NULL!	#NULL!	3	7	6686.5	7444.48	#NULL!	6444.64	#NULL!	5675.17	7923.85	#NULL!	7223.26	#NULL!	#NULL!	#NULL!	#NULL!	#NULL!	#NULL!	#NULL!	#NULL!	#NULL!	512	517	1	2	8	2	8	8	2	8	1	8	1	1	2	8	8	8
A960935702	A9609357	2011	1	1	1	A960	2	60	#NULL!	#NULL!	#NULL!	3	7	6686.5	7321.82	#NULL!	5268.16	#NULL!	5157.09	7085.56	#NULL!	5506.11	#NULL!	#NULL!	#NULL!	#NULL!	#NULL!	#NULL!	#NULL!	#NULL!	#NULL!	512	517	1	2	8	2	8	8	2	8	1	8	2	8	2	8	8	8
A960935801	A9609358	2011	1	1	1	A960	2	26	#NULL!	4	4	3	1	6686.5	13026.4	10585.5	#NULL!	#NULL!	12316.6	12886.5	#NULL!	#NULL!	12216.7	#NULL!	#NULL!	#NULL!	#NULL!	#NULL!	#NULL!	#NULL!	#NULL!	512	517	1	2	8	8	8	8	2	8	1	8	2	8	2	8	8	8
A960935802	A9609358	2011	1	1	1	A960	1	36	#NULL!	4	4	3	6	6686.5	11628.5	15271.6	#NULL!	#NULL!	11659.9	17051.7	#NULL!	#NULL!	19807.3	#NULL!	#NULL!	#NULL!	#NULL!	#NULL!	#NULL!	#NULL!	#NULL!	512	517	1	2	8	8	8	8	2	8	1	8	2	8	2	8	8	8
A960936401	A9609364	2011	1	1	1	A960	2	74	#NULL!	1	1	2	7	6686.5	4125.99	#NULL!	#NULL!	#NULL!	3964.29	4331.8	#NULL!	#NULL!	#NULL!	#NULL!	#NULL!	#NULL!	#NULL!	#NULL!	#NULL!	#NULL!	#NULL!	512	517	1	2	8	1	2	2	2	8	1	8	1	1	1	1	1	1
A960936901	A9609369	2011	1	1	1	A960	1	58	#NULL!	2	3	4	1	6686.5	8966.37	#NULL!	13634.5	#NULL!	14066.7	13948.7	#NULL!	15763.1	#NULL!	#NULL!	#NULL!	#NULL!	#NULL!	#NULL!	#NULL!	#NULL!	#NULL!	512	517	1	2	8	2	8	8	2	8	1	8	1	1	2	8	8	8
A960936902	A9609369	2011	1	1	1	A960	2	53	#NULL!	2	3	4	1	6686.5	7651.21	35453.9	11628.9	#NULL!	9860.28	10830.1	58657.6	12082.7	63290.4	61465.9	#NULL!	#NULL!	#NULL!	#NULL!	#NULL!	#NULL!	#NULL!	512	517	1	2	8	2	8	8	2	8	1	8	2	8	2	8	8	8
A960936905	A9609369	2011	1	1	1	A960	2	23	#NULL!	2	3	3	7	6686.5	14364.6	29450.3	#NULL!	#NULL!	#NULL!	#NULL!	#NULL!	#NULL!	#NULL!	#NULL!	#NULL!	#NULL!	#NULL!	#NULL!	#NULL!	#NULL!	#NULL!	512	517	1	2	8	8	8	8	2	8	1	8	2	8	2	8	8	8
A960936906	A9609369	2011	1	1	1	A960	2	79	#NULL!	4	3	1	7	6686.5	5441.33	#NULL!	#NULL!	#NULL!	7209.8	7219.67	#NULL!	#NULL!	#NULL!	#NULL!	#NULL!	#NULL!	#NULL!	#NULL!	#NULL!	#NULL!	#NULL!	512	517	1	2	8	2	8	8	2	8	2	3	2	8	2	8	8	8
A960937701	A9609377	2011	1	1	1	A960	1	47	#NULL!	2	2	3	7	6686.5	18140.2	#NULL!	24490.4	#NULL!	18883.7	20673.6	#NULL!	27179.2	#NULL!	#NULL!	#NULL!	#NULL!	#NULL!	#NULL!	#NULL!	#NULL!	#NULL!	512	517	1	2	8	2	8	8	2	8	1	8	2	8	2	8	8	8
A960937703	A9609377	2011	1	1	1	A960	1	10	#NULL!	2	2	1	#NULL!	6686.5	10950.8	11435.2	#NULL!	#NULL!	11238.8	11513.7	#NULL!	#NULL!	28994.2	#NULL!	#NULL!	#NULL!	#NULL!	#NULL!	#NULL!	#NULL!	#NULL!	512	517	1	2	8	8	8	8	8	8	8	8	8	8	1	1	2	1
A960937704	A9609377	2011	1	1	1	A960	2	5	71	2	2	1	#NULL!	6686.5	10434.1	#NULL!	#NULL!	#NULL!	11355.4	9527.49	#NULL!	#NULL!	#NULL!	#NULL!	#NULL!	#NULL!	#NULL!	#NULL!	#NULL!	#NULL!	#NULL!	512	517	1	2	8	8	8	8	8	8	8	8	8	8	8	8	8	8
A961933201	A9619332	2011	1	1	1	A961	1	75	#NULL!	1	1	1	7	6128.98	4049.82	#NULL!	7598.33	#NULL!	3978.95	4314.54	#NULL!	7928.45	#NULL!	#NULL!	#NULL!	#NULL!	#NULL!	#NULL!	#NULL!	#NULL!	#NULL!	512	517	1	2	8	2	8	8	2	8	2	3	1	2	2	8	8	8
A961933202	A9619332	2011	1	1	1	A961	2	73	#NULL!	1	1	1	7	6128.98	3981.01	#NULL!	9195.15	#NULL!	3825	4179.59	#NULL!	9594.89	#NULL!	#NULL!	#NULL!	#NULL!	#NULL!	#NULL!	#NULL!	#NULL!	#NULL!	512	517	1	2	8	1	2	2	2	8	2	3	2	8	2	8	8	8
A961933203	A9619332	2011	1	1	1	A961	2	44	#NULL!	1	1	3	3	6128.98	8003.44	#NULL!	11161	#NULL!	8445.84	8783.22	#NULL!	10742.2	#NULL!	#NULL!	#NULL!	#NULL!	#NULL!	#NULL!	#NULL!	#NULL!	#NULL!	512	517	1	2	8	2	8	8	2	8	1	8	2	8	2	8	8	8
A961933302	A9619333	2011	1	1	1	A961	2	62	#NULL!	2	2	1	6	6128.98	9419.41	16968.4	10166.1	#NULL!	4975.89	9115.46	24074.1	10625.3	17285.3	25088.4	#NULL!	#NULL!	#NULL!	#NULL!	#NULL!	#NULL!	#NULL!	512	517	1	2	8	2	8	8	2	8	1	8	2	8	2	8	8	8
A961933601	A9619336	2011	1	1	1	A961	2	79	#NULL!	#NULL!	#NULL!	#NULL!	#NULL!	6128.98	8400.22	#NULL!	#NULL!	#NULL!	8347.76	8359.19	#NULL!	#NULL!	#NULL!	#NULL!	#NULL!	#NULL!	#NULL!	#NULL!	#NULL!	#NULL!	#NULL!	512	517	1	2	8	2	8	8	2	8	3	3	2	8	2	8	8	8
A961934001	A9619340	2011	1	1	1	A961	2	40	#NULL!	2	2	3	6	6128.98	8003.44	30829	#NULL!	#NULL!	8445.84	8783.22	#NULL!	#NULL!	27442	#NULL!	#NULL!	#NULL!	#NULL!	#NULL!	#NULL!	#NULL!	#NULL!	512	517	1	2	8	1	2	2	2	8	1	8	2	8	2	8	8	8
A961934002	A9619340	2011	1	1	1	A961	1	43	#NULL!	2	2	4	3	6128.98	12597.4	#NULL!	24612.4	#NULL!	13890.5	17499.9	#NULL!	28010.8	#NULL!	#NULL!	#NULL!	#NULL!	#NULL!	#NULL!	#NULL!	#NULL!	#NULL!	512	517	1	2	8	2	8	8	2	8	1	8	2	8	2	8	8	8
A961934003	A9619340	2011	1	1	1	A961	2	11	#NULL!	1	2	1	#NULL!	6128.98	7502.17	#NULL!	#NULL!	#NULL!	7970.71	8968.47	#NULL!	#NULL!	#NULL!	#NULL!	#NULL!	#NULL!	#NULL!	#NULL!	#NULL!	#NULL!	#NULL!	512	517	1	2	8	8	8	8	8	8	8	8	8	8	1	2	1	1
A961934004	A9619340	2011	1	1	1	A961	1	10	#NULL!	2	2	1	#NULL!	6128.98	5282.99	22066.7	#NULL!	#NULL!	5421.97	8331.85	#NULL!	#NULL!	18650.3	#NULL!	#NULL!	#NULL!	#NULL!	#NULL!	#NULL!	#NULL!	#NULL!	512	517	1	2	8	8	8	8	8	8	8	8	8	8	2	8	8	8
A961934201	A9619342	2011	1	1	1	A961	1	52	#NULL!	3	4	3	1	6128.98	12739.6	#NULL!	11502.8	#NULL!	14778.1	16284.6	#NULL!	13921.2	#NULL!	#NULL!	#NULL!	#NULL!	#NULL!	#NULL!	#NULL!	#NULL!	#NULL!	512	517	1	2	8	1	2	2	2	8	1	8	1	2	2	8	8	8
A961934202	A9619342	2011	1	1	1	A961	2	52	#NULL!	3	4	2	3	6128.98	7874.53	27366.5	7480.19	#NULL!	7611.05	8359.62	37731	7772.12	27092.1	39537.5	#NULL!	#NULL!	#NULL!	#NULL!	#NULL!	#NULL!	#NULL!	512	517	1	2	8	1	2	2	2	8	1	8	2	8	2	8	8	8
A961934203	A9619342	2011	1	1	1	A961	1	30	#NULL!	4	4	4	1	6128.98	12989.4	36424.2	#NULL!	#NULL!	13642.7	20572.1	#NULL!	#NULL!	47177.7	#NULL!	#NULL!	#NULL!	#NULL!	#NULL!	#NULL!	#NULL!	#NULL!	512	517	1	2	8	8	8	8	2	8	1	8	2	8	2	8	8	8
A961934401	A9619344	2011	1	1	1	A961	1	43	#NULL!	4	4	4	2	6128.98	12597.4	#NULL!	13977.6	#NULL!	13890.5	17499.9	#NULL!	18282.1	#NULL!	#NULL!	#NULL!	#NULL!	#NULL!	#NULL!	#NULL!	#NULL!	#NULL!	512	517	1	2	8	2	8	8	2	8	1	8	2	8	2	8	8	8
A961934402	A9619344	2011	1	1	1	A961	2	42	#NULL!	4	4	4	7	6128.98	8003.44	#NULL!	11161	#NULL!	8445.84	8783.22	#NULL!	10742.2	#NULL!	#NULL!	#NULL!	#NULL!	#NULL!	#NULL!	#NULL!	#NULL!	#NULL!	512	517	1	1	2	2	8	8	2	8	2	3	2	8	1	2	2	2
A961934403	A9619344	2011	1	1	1	A961	1	10	#NULL!	4	4	1	#NULL!	6128.98	5282.99	#NULL!	#NULL!	#NULL!	5421.97	8331.85	#NULL!	#NULL!	#NULL!	#NULL!	#NULL!	#NULL!	#NULL!	#NULL!	#NULL!	#NULL!	#NULL!	512	517	1	2	8	8	8	8	8	8	8	8	8	8	2	8	8	8
A961934501	A9619345	2011	1	1	1	A961	1	35	#NULL!	1	1	4	7	6128.98	11219.9	#NULL!	#NULL!	#NULL!	11250.2	16452.6	#NULL!	#NULL!	#NULL!	#NULL!	#NULL!	#NULL!	#NULL!	#NULL!	#NULL!	#NULL!	#NULL!	512	517	1	2	8	8	8	8	2	8	1	8	2	8	2	8	8	8
A961934502	A9619345	2011	1	1	1	A961	2	79	#NULL!	1	1	1	7	6128.98	4200.11	#NULL!	#NULL!	#NULL!	4173.88	4179.59	#NULL!	#NULL!	#NULL!	#NULL!	#NULL!	#NULL!	#NULL!	#NULL!	#NULL!	#NULL!	#NULL!	512	517	1	2	8	1	2	2	2	8	1	8	2	8	2	8	8	8
A961934702	A9619347	2011	1	1	1	A961	2	76	#NULL!	1	1	1	7	6128.98	8400.22	#NULL!	#NULL!	#NULL!	8347.76	8359.19	#NULL!	#NULL!	#NULL!	#NULL!	#NULL!	#NULL!	#NULL!	#NULL!	#NULL!	#NULL!	#NULL!	512	517	1	2	8	2	8	8	1	1	2	3	2	8	2	8	8	8
A961934901	A9619349	2011	1	1	1	A961	1	58	#NULL!	1	2	3	6	6128.98	6921.05	#NULL!	#NULL!	#NULL!	8143.45	8075.14	#NULL!	#NULL!	#NULL!	#NULL!	#NULL!	#NULL!	#NULL!	#NULL!	#NULL!	#NULL!	#NULL!	512	517	1	2	8	2	8	8	1	2	1	8	2	8	2	8	8	8
A961934902	A9619349	2011	1	1	1	A961	2	55	#NULL!	1	2	2	3	6128.98	4528.71	#NULL!	12119.8	#NULL!	4266.89	5335.33	#NULL!	12203.9	#NULL!	#NULL!	#NULL!	#NULL!	#NULL!	#NULL!	#NULL!	#NULL!	#NULL!	512	517	1	2	8	2	8	8	2	8	1	8	2	8	2	8	8	8
A961934903	A9619349	2011	1	1	1	A961	2	30	#NULL!	1	2	4	2	6128.98	7672.54	29316.9	#NULL!	#NULL!	8160.28	10439.6	#NULL!	#NULL!	30726.8	#NULL!	#NULL!	#NULL!	#NULL!	#NULL!	#NULL!	#NULL!	#NULL!	512	517	1	1	2	8	8	8	2	8	1	8	2	8	1	2	1	1
A961935301	A9619353	2011	1	1	1	A961	1	72	#NULL!	3	2	2	5	6128.98	11834.6	#NULL!	#NULL!	#NULL!	#NULL!	#NULL!	#NULL!	#NULL!	#NULL!	#NULL!	#NULL!	#NULL!	#NULL!	#NULL!	#NULL!	#NULL!	#NULL!	512	517	1	1	1	1	2	1	1	2	1	8	1	2	1	2	2	2
A961935501	A9619355	2011	1	1	1	A961	2	51	#NULL!	2	2	3	3	6128.98	7874.53	#NULL!	#NULL!	#NULL!	11416.6	12539.4	#NULL!	#NULL!	#NULL!	#NULL!	#NULL!	#NULL!	#NULL!	#NULL!	#NULL!	#NULL!	#NULL!	512	517	1	2	8	1	1	2	2	8	1	8	2	8	2	8	8	8
A961935502	A9619355	2011	1	1	1	A961	2	22	#NULL!	2	2	3	3	6128.98	14783.9	#NULL!	#NULL!	#NULL!	19686.1	20074.5	#NULL!	#NULL!	#NULL!	#NULL!	#NULL!	#NULL!	#NULL!	#NULL!	#NULL!	#NULL!	#NULL!	512	517	1	1	2	8	8	8	2	8	1	8	2	8	1	2	2	2
A961935503	A9619355	2011	1	1	1	A961	2	19	#NULL!	2	2	2	7	6128.98	13305.1	52822.7	#NULL!	#NULL!	#NULL!	#NULL!	#NULL!	#NULL!	#NULL!	#NULL!	#NULL!	#NULL!	#NULL!	#NULL!	#NULL!	#NULL!	#NULL!	512	517	1	2	8	8	8	8	2	8	1	8	2	8	2	8	8	8
A961935802	A9619358	2011	1	1	1	A961	2	59	#NULL!	3	3	2	6	6128.98	6793.06	#NULL!	12119.8	#NULL!	4266.89	8003	#NULL!	12203.9	#NULL!	#NULL!	#NULL!	#NULL!	#NULL!	#NULL!	#NULL!	#NULL!	#NULL!	512	517	1	2	8	1	2	2	2	8	1	8	2	8	2	8	8	8
A961935803	A9619358	2011	1	1	1	A961	1	23	#NULL!	3	3	3	3	6128.98	17904.9	40490.4	#NULL!	#NULL!	15782.7	23766.3	#NULL!	#NULL!	47591.9	#NULL!	#NULL!	#NULL!	#NULL!	#NULL!	#NULL!	#NULL!	#NULL!	512	517	1	2	8	8	8	8	2	8	1	8	2	8	2	8	8	8
A961936101	A9619361	2011	1	1	1	A961	1	42	#NULL!	3	3	3	1	6128.98	12597.4	30456.1	13977.6	#NULL!	13890.5	17499.9	41632.1	18282.1	50812	51274.7	#NULL!	#NULL!	#NULL!	#NULL!	#NULL!	#NULL!	#NULL!	512	517	1	2	8	1	1	2	2	8	1	8	2	8	2	8	8	8
A961936102	A9619361	2011	1	1	1	A961	2	41	#NULL!	3	3	3	7	6128.98	8003.44	#NULL!	11161	#NULL!	8445.84	8783.22	#NULL!	10742.2	#NULL!	#NULL!	#NULL!	#NULL!	#NULL!	#NULL!	#NULL!	#NULL!	#NULL!	512	517	1	2	8	2	8	8	2	8	1	8	2	8	2	8	8	8
A961936103	A9619361	2011	1	1	1	A961	1	12	#NULL!	3	3	1	#NULL!	6128.98	5282.99	#NULL!	#NULL!	#NULL!	5421.97	8331.85	#NULL!	#NULL!	#NULL!	#NULL!	#NULL!	#NULL!	#NULL!	#NULL!	#NULL!	#NULL!	#NULL!	512	517	1	2	8	8	8	8	8	8	1	8	2	8	2	8	8	8
A961936104	A9619361	2011	1	1	1	A961	2	9	#NULL!	3	3	1	#NULL!	6128.98	5033.76	#NULL!	#NULL!	#NULL!	5478.22	6894.54	#NULL!	#NULL!	#NULL!	#NULL!	#NULL!	#NULL!	#NULL!	#NULL!	#NULL!	#NULL!	#NULL!	512	517	1	2	8	8	8	8	8	8	8	8	8	8	2	8	8	8
A961936802	A9619368	2011	1	1	1	A961	2	42	#NULL!	4	4	3	7	6128.98	8003.44	#NULL!	11161	#NULL!	8445.84	8783.22	#NULL!	10742.2	#NULL!	#NULL!	#NULL!	#NULL!	#NULL!	#NULL!	#NULL!	#NULL!	#NULL!	512	517	1	2	8	2	8	8	2	8	1	8	2	8	2	8	8	8
A961936803	A9619368	2011	1	1	1	A961	1	14	#NULL!	4	4	1	#NULL!	6128.98	5282.99	#NULL!	#NULL!	#NULL!	5421.97	8331.85	#NULL!	#NULL!	#NULL!	#NULL!	#NULL!	#NULL!	#NULL!	#NULL!	#NULL!	#NULL!	#NULL!	512	517	1	2	8	8	8	8	8	8	1	8	2	8	2	8	8	8
A961936804	A9619368	2011	1	1	1	A961	1	12	#NULL!	4	4	1	#NULL!	6128.98	5282.99	22066.7	#NULL!	#NULL!	5421.97	8331.85	#NULL!	#NULL!	27975.5	#NULL!	#NULL!	#NULL!	#NULL!	#NULL!	#NULL!	#NULL!	#NULL!	512	517	1	2	8	8	8	8	8	8	1	8	2	8	2	8	8	8
A961937201	A9619372	2011	1	1	1	A961	2	51	#NULL!	1	2	4	2	6128.98	5905.89	#NULL!	7480.19	#NULL!	5708.29	6269.72	#NULL!	7772.12	#NULL!	#NULL!	#NULL!	#NULL!	#NULL!	#NULL!	#NULL!	#NULL!	#NULL!	512	517	1	2	8	2	8	8	2	8	1	8	2	8	2	8	8	8
A961937202	A9619372	2011	1	1	1	A961	1	19	#NULL!	1	2	3	3	6128.98	9362.28	#NULL!	#NULL!	#NULL!	10469	15098.7	#NULL!	#NULL!	#NULL!	#NULL!	#NULL!	#NULL!	#NULL!	#NULL!	#NULL!	#NULL!	#NULL!	512	517	1	1	2	8	8	8	2	8	1	8	2	8	2	8	8	8
A961937203	A9619372	2011	1	1	1	A961	2	15	#NULL!	1	2	2	7	6128.98	9978.82	13205.7	#NULL!	#NULL!	10731	13339.7	#NULL!	#NULL!	37317.1	#NULL!	#NULL!	#NULL!	#NULL!	#NULL!	#NULL!	#NULL!	#NULL!	512	517	1	2	8	8	8	8	8	8	1	8	2	8	2	8	8	8
A961937502	A9619375	2011	1	1	1	A961	2	48	#NULL!	1	2	2	5	6128.98	9845.35	27688.5	22723.1	#NULL!	6938.27	10685.5	57774	24552.1	33720.9	60497.1	#NULL!	#NULL!	#NULL!	#NULL!	#NULL!	#NULL!	#NULL!	512	517	1	1	2	2	8	8	2	8	1	8	2	8	2	8	8	8
A961937503	A9619375	2011	1	1	1	A961	2	21	#NULL!	1	2	3	7	6128.98	14783.9	22732.4	#NULL!	#NULL!	14940.3	18758.4	#NULL!	#NULL!	32332.4	#NULL!	#NULL!	#NULL!	#NULL!	#NULL!	#NULL!	#NULL!	#NULL!	512	517	1	1	2	8	8	8	2	8	1	8	2	8	1	2	1	1
A961937504	A9619375	2011	1	1	1	A961	2	12	#NULL!	1	2	1	#NULL!	6128.98	10002.9	#NULL!	#NULL!	#NULL!	7970.71	11210.6	#NULL!	#NULL!	#NULL!	#NULL!	#NULL!	#NULL!	#NULL!	#NULL!	#NULL!	#NULL!	#NULL!	512	517	1	2	8	8	8	8	8	8	1	8	2	8	2	8	8	8
A961937505	A9619375	2011	1	1	1	A961	2	79	#NULL!	3	2	1	7	6128.98	5600.15	#NULL!	#NULL!	#NULL!	4173.88	5224.49	#NULL!	#NULL!	#NULL!	#NULL!	#NULL!	#NULL!	#NULL!	#NULL!	#NULL!	#NULL!	#NULL!	512	517	1	1	1	2	8	8	2	8	1	8	2	8	1	1	2	2
A961937601	A9619376	2011	1	1	1	A961	1	46	#NULL!	4	4	3	3	6128.98	10944.6	35937	16424.4	#NULL!	#NULL!	#NULL!	44497.2	#NULL!	#NULL!	#NULL!	#NULL!	#NULL!	#NULL!	#NULL!	#NULL!	#NULL!	#NULL!	512	517	1	2	8	2	8	8	2	8	1	8	2	8	2	8	8	8
A961937602	A9619376	2011	1	1	1	A961	2	42	#NULL!	4	4	3	2	6128.98	8003.44	#NULL!	11161	#NULL!	11261.1	11711	#NULL!	21484.4	#NULL!	#NULL!	#NULL!	#NULL!	#NULL!	#NULL!	#NULL!	#NULL!	#NULL!	512	517	1	1	2	2	8	8	2	8	1	8	2	8	1	1	1	1
A961937603	A9619376	2011	1	1	1	A961	1	16	#NULL!	4	4	2	7	6128.98	9362.28	32216.7	#NULL!	#NULL!	13958.7	19798.1	#NULL!	#NULL!	60641.9	#NULL!	#NULL!	#NULL!	#NULL!	#NULL!	#NULL!	#NULL!	#NULL!	512	517	1	2	8	8	8	8	8	8	1	8	2	8	2	8	8	8
A961937604	A9619376	2011	1	1	1	A961	1	13	#NULL!	4	4	1	#NULL!	6128.98	5282.99	#NULL!	#NULL!	#NULL!	7229.3	11109.1	#NULL!	#NULL!	#NULL!	#NULL!	#NULL!	#NULL!	#NULL!	#NULL!	#NULL!	#NULL!	#NULL!	512	517	1	1	2	8	8	8	8	8	1	8	2	8	1	1	1	1
A961937901	A9619379	2011	1	1	1	A961	1	33	#NULL!	4	4	4	1	6128.98	9742.08	#NULL!	#NULL!	#NULL!	10232	19737.5	#NULL!	#NULL!	#NULL!	#NULL!	#NULL!	#NULL!	#NULL!	#NULL!	#NULL!	#NULL!	#NULL!	512	517	1	2	8	8	8	8	2	8	1	8	1	2	2	8	8	8
A961937902	A9619379	2011	1	1	1	A961	2	28	#NULL!	4	4	3	1	6128.98	12568.7	20427	#NULL!	#NULL!	11883.8	12433.7	#NULL!	#NULL!	23574.9	#NULL!	#NULL!	#NULL!	#NULL!	#NULL!	#NULL!	#NULL!	#NULL!	512	517	1	1	2	8	8	8	2	8	1	8	2	8	1	1	2	1
A961938101	A9619381	2011	1	1	1	A961	1	52	#NULL!	2	3	3	5	6128.98	14332.1	42976.4	23005.6	#NULL!	11083.6	18320.2	38360.6	25271.5	46466.2	44468.6	#NULL!	#NULL!	#NULL!	#NULL!	#NULL!	#NULL!	#NULL!	512	517	1	1	1	2	8	8	2	8	1	8	2	8	1	2	2	1
A961938103	A9619381	2011	1	1	1	A961	2	21	#NULL!	2	3	4	7	6128.98	16631.9	#NULL!	#NULL!	#NULL!	14940.3	20074.5	#NULL!	#NULL!	#NULL!	#NULL!	#NULL!	#NULL!	#NULL!	#NULL!	#NULL!	#NULL!	#NULL!	512	517	1	2	8	8	8	8	2	8	1	8	1	1	2	8	8	8
A961938201	A9619382	2011	1	1	1	A961	1	38	#NULL!	3	3	4	1	6128.98	11219.9	#NULL!	#NULL!	#NULL!	11250.2	16452.6	#NULL!	#NULL!	#NULL!	#NULL!	#NULL!	#NULL!	#NULL!	#NULL!	#NULL!	#NULL!	#NULL!	512	517	1	2	8	8	8	8	2	8	1	8	2	8	2	8	8	8
A961938202	A9619382	2011	1	1	1	A961	2	33	#NULL!	3	3	4	7	6128.98	7672.54	#NULL!	#NULL!	#NULL!	8160.28	10439.6	#NULL!	#NULL!	#NULL!	#NULL!	#NULL!	#NULL!	#NULL!	#NULL!	#NULL!	#NULL!	#NULL!	512	517	1	1	2	8	8	8	2	8	1	8	1	2	1	1	1	1
A961938203	A9619382	2011	1	1	1	A961	2	2	32	4	3	1	#NULL!	6128.98	4048.07	#NULL!	#NULL!	#NULL!	3886.76	6202.24	#NULL!	#NULL!	#NULL!	#NULL!	#NULL!	#NULL!	#NULL!	#NULL!	#NULL!	#NULL!	#NULL!	512	517	1	8	8	8	8	8	8	8	8	8	8	8	8	8	8	8
A962929901	A9629299	2011	1	1	2	A962	1	54	#NULL!	2	2	3	3	2640.8	3466.82	#NULL!	4173.65	#NULL!	4021.54	4431.51	#NULL!	5051.15	#NULL!	#NULL!	#NULL!	#NULL!	#NULL!	#NULL!	#NULL!	#NULL!	#NULL!	501	501	1	2	8	2	8	8	2	8	1	8	1	1	2	8	8	8
A962929902	A9629299	2011	1	1	2	A962	2	51	#NULL!	2	2	3	7	2640.8	2142.89	#NULL!	2714.1	#NULL!	2071.19	2274.89	#NULL!	2820.03	#NULL!	#NULL!	#NULL!	#NULL!	#NULL!	#NULL!	#NULL!	#NULL!	#NULL!	501	501	1	1	2	2	8	8	1	1	1	8	2	8	1	1	1	1
A962929903	A9629299	2011	1	1	2	A962	2	22	#NULL!	2	2	3	7	2640.8	4023.12	12372.3	#NULL!	#NULL!	5420.92	5445.02	#NULL!	#NULL!	14077.7	#NULL!	#NULL!	#NULL!	#NULL!	#NULL!	#NULL!	#NULL!	#NULL!	501	501	1	2	8	8	8	8	2	8	1	8	2	8	2	8	8	8
A962930101	A9629301	2011	1	1	2	A962	2	61	#NULL!	4	4	3	3	2640.8	1708.86	#NULL!	#NULL!	#NULL!	1805.44	1653.72	#NULL!	#NULL!	#NULL!	#NULL!	#NULL!	#NULL!	#NULL!	#NULL!	#NULL!	#NULL!	#NULL!	501	501	1	2	8	2	8	8	2	8	1	8	2	8	2	8	8	8
A962930601	A9629306	2011	1	1	2	A962	1	56	#NULL!	3	3	3	7	2640.8	2511.22	#NULL!	3182.19	#NULL!	2954.76	2929.97	#NULL!	3679	#NULL!	#NULL!	#NULL!	#NULL!	#NULL!	#NULL!	#NULL!	#NULL!	#NULL!	501	501	1	2	8	2	8	8	2	8	1	8	2	8	1	1	1	1
A962930602	A9629306	2011	1	1	2	A962	2	53	#NULL!	3	3	2	3	2640.8	2142.89	9929.62	2714.1	#NULL!	2071.19	2274.89	13690.3	2820.03	9830.07	14345.7	#NULL!	#NULL!	#NULL!	#NULL!	#NULL!	#NULL!	#NULL!	501	501	1	2	8	2	8	8	2	8	1	8	2	8	2	8	8	8
A962930603	A9629306	2011	1	1	2	A962	1	27	#NULL!	3	3	3	3	2640.8	5149.62	9532.49	#NULL!	#NULL!	6915.62	8931.93	#NULL!	#NULL!	11160.9	#NULL!	#NULL!	#NULL!	#NULL!	#NULL!	#NULL!	#NULL!	#NULL!	501	501	1	2	8	8	8	8	2	8	1	8	2	8	1	2	2	1
A962930604	A9629306	2011	1	1	2	A962	2	26	#NULL!	3	3	4	3	2640.8	4560.42	#NULL!	#NULL!	#NULL!	4311.91	4511.42	#NULL!	#NULL!	#NULL!	#NULL!	#NULL!	#NULL!	#NULL!	#NULL!	#NULL!	#NULL!	#NULL!	501	501	1	2	8	8	8	8	2	8	1	8	2	8	2	8	8	8
A962931801	A9629318	2011	1	1	2	A962	1	59	#NULL!	4	4	4	1	2640.8	2511.22	7247.57	3182.19	#NULL!	2954.76	2929.97	9706.9	3679	8004.3	10720.7	#NULL!	#NULL!	#NULL!	#NULL!	#NULL!	#NULL!	#NULL!	501	501	1	2	8	2	8	8	2	8	2	3	2	8	2	8	8	8
A962931802	A9629318	2011	1	1	2	A962	2	53	#NULL!	4	4	4	7	2640.8	2142.89	#NULL!	2714.1	#NULL!	2071.19	2274.89	#NULL!	2820.03	#NULL!	#NULL!	#NULL!	#NULL!	#NULL!	#NULL!	#NULL!	#NULL!	#NULL!	501	501	1	2	8	2	8	8	1	1	1	8	2	8	1	2	2	2
A962931901	A9629319	2011	1	1	2	A962	1	51	#NULL!	4	4	4	3	2640.8	3466.82	#NULL!	4173.65	#NULL!	5362.06	5908.68	#NULL!	5051.15	#NULL!	#NULL!	#NULL!	#NULL!	#NULL!	#NULL!	#NULL!	#NULL!	#NULL!	501	501	1	1	2	2	8	8	2	8	2	3	2	8	1	1	2	2
A962931902	A9629319	2011	1	1	2	A962	2	51	#NULL!	4	4	4	7	2640.8	2142.89	#NULL!	2714.1	#NULL!	2761.58	3033.19	#NULL!	2820.03	#NULL!	#NULL!	#NULL!	#NULL!	#NULL!	#NULL!	#NULL!	#NULL!	#NULL!	501	501	1	2	8	2	8	8	2	8	1	8	2	8	2	8	8	8
A962931903	A9629319	2011	1	1	2	A962	1	23	#NULL!	4	4	3	7	2640.8	4331.06	19588.6	#NULL!	#NULL!	7635.41	11671.4	#NULL!	#NULL!	23024.2	#NULL!	#NULL!	#NULL!	#NULL!	#NULL!	#NULL!	#NULL!	#NULL!	501	501	1	2	8	8	8	8	2	8	1	8	2	8	2	8	8	8
A962931904	A9629319	2011	1	1	2	A962	2	22	#NULL!	4	4	3	1	2640.8	4023.12	#NULL!	#NULL!	#NULL!	#NULL!	#NULL!	#NULL!	#NULL!	#NULL!	#NULL!	#NULL!	#NULL!	#NULL!	#NULL!	#NULL!	#NULL!	#NULL!	501	501	1	1	2	8	8	8	2	8	1	8	2	8	2	8	8	8
A962932101	A9629321	2011	1	1	2	A962	1	75	#NULL!	4	3	3	7	2640.8	1469.43	#NULL!	#NULL!	#NULL!	#NULL!	#NULL!	#NULL!	#NULL!	#NULL!	#NULL!	#NULL!	#NULL!	#NULL!	#NULL!	#NULL!	#NULL!	#NULL!	501	501	1	2	8	2	8	8	2	8	1	8	2	8	1	2	2	2
A962932102	A9629321	2011	1	1	2	A962	2	68	#NULL!	4	3	3	7	2640.8	1613.96	#NULL!	#NULL!	#NULL!	#NULL!	#NULL!	#NULL!	#NULL!	#NULL!	#NULL!	#NULL!	#NULL!	#NULL!	#NULL!	#NULL!	#NULL!	#NULL!	501	501	1	2	8	1	2	1	2	8	1	8	2	8	2	8	8	8
A962932103	A9629321	2011	1	1	2	A962	1	40	#NULL!	3	3	4	1	2640.8	4570.82	16576	15214.8	#NULL!	#NULL!	#NULL!	22658.6	#NULL!	#NULL!	#NULL!	#NULL!	#NULL!	#NULL!	#NULL!	#NULL!	#NULL!	#NULL!	501	501	1	1	2	2	8	8	2	8	1	8	2	8	1	1	1	1
A962932301	A9629323	2011	1	1	2	A962	1	57	#NULL!	4	4	4	1	2640.8	2511.22	5435.68	3182.19	#NULL!	2954.76	2929.97	9706.9	3679	6003.23	10720.7	#NULL!	#NULL!	#NULL!	#NULL!	#NULL!	#NULL!	#NULL!	501	501	1	2	8	2	8	8	2	8	1	8	1	2	2	8	8	8
A962932302	A9629323	2011	1	1	2	A962	2	51	#NULL!	4	4	4	1	2640.8	2142.89	#NULL!	2714.1	#NULL!	2071.19	2274.89	#NULL!	2820.03	#NULL!	#NULL!	#NULL!	#NULL!	#NULL!	#NULL!	#NULL!	#NULL!	#NULL!	501	501	1	2	8	2	8	8	1	1	2	3	2	8	2	8	8	8
A962932303	A9629323	2011	1	1	2	A962	2	19	#NULL!	4	4	3	7	2640.8	3620.7	7187.29	#NULL!	#NULL!	3893.62	4840.15	#NULL!	#NULL!	6770.05	#NULL!	#NULL!	#NULL!	#NULL!	#NULL!	#NULL!	#NULL!	#NULL!	501	501	1	2	8	8	8	8	2	8	1	8	2	8	2	8	8	8
A962932701	A9629327	2011	1	1	2	A962	1	66	#NULL!	2	1	3	4	2640.8	1329.16	5176.42	#NULL!	#NULL!	1611.15	1716.33	#NULL!	#NULL!	5434.12	#NULL!	#NULL!	#NULL!	#NULL!	#NULL!	#NULL!	#NULL!	#NULL!	501	501	1	2	8	2	8	8	2	8	1	8	2	8	2	8	8	8
A962932702	A9629327	2011	1	1	2	A962	2	65	#NULL!	2	1	2	7	2640.8	1613.96	#NULL!	3670.59	#NULL!	2337.95	1521.22	#NULL!	4156.42	#NULL!	#NULL!	#NULL!	#NULL!	#NULL!	#NULL!	#NULL!	#NULL!	#NULL!	501	501	1	2	8	2	8	8	2	8	1	8	1	1	2	8	8	8
A962933601	A9629336	2011	1	1	2	A962	1	61	#NULL!	4	4	4	7	2640.8	1737.49	#NULL!	2256.2	#NULL!	1986.82	1849.37	#NULL!	2528.79	#NULL!	#NULL!	#NULL!	#NULL!	#NULL!	#NULL!	#NULL!	#NULL!	#NULL!	501	501	1	2	8	2	8	8	1	1	1	8	2	8	2	8	8	8
A962933602	A9629336	2011	1	1	2	A962	2	55	#NULL!	4	4	4	1	2640.8	1643.19	#NULL!	2198.77	#NULL!	1548.19	1935.86	#NULL!	2214.01	#NULL!	#NULL!	#NULL!	#NULL!	#NULL!	#NULL!	#NULL!	#NULL!	#NULL!	501	501	1	2	8	2	8	8	2	8	1	8	2	8	2	8	8	8
A962933603	A9629336	2011	1	1	2	A962	1	32	#NULL!	4	4	4	1	2640.8	3534.8	13216.1	#NULL!	#NULL!	3712.57	7161.51	#NULL!	#NULL!	17117.9	#NULL!	#NULL!	#NULL!	#NULL!	#NULL!	#NULL!	#NULL!	#NULL!	501	501	1	2	8	8	8	8	2	8	1	8	2	8	2	8	8	8
A962933604	A9629336	2011	1	1	2	A962	1	29	#NULL!	4	4	4	7	2640.8	5149.62	9532.49	#NULL!	#NULL!	6915.62	8931.93	#NULL!	#NULL!	11160.9	#NULL!	#NULL!	#NULL!	#NULL!	#NULL!	#NULL!	#NULL!	#NULL!	501	501	1	2	8	8	8	8	2	8	1	8	2	8	2	8	8	8
A962933901	A9629339	2011	1	1	2	A962	1	51	#NULL!	1	1	4	1	2640.8	3466.82	#NULL!	4173.65	#NULL!	4021.54	4431.51	#NULL!	5051.15	#NULL!	#NULL!	#NULL!	#NULL!	#NULL!	#NULL!	#NULL!	#NULL!	#NULL!	501	501	1	2	8	2	8	8	2	8	3	1	1	1	1	1	2	2
A962933902	A9629339	2011	1	1	2	A962	2	49	#NULL!	1	1	4	1	2640.8	2679.2	#NULL!	3627.1	#NULL!	2517.47	3101.69	#NULL!	3816.64	#NULL!	#NULL!	#NULL!	#NULL!	#NULL!	#NULL!	#NULL!	#NULL!	#NULL!	501	501	1	1	2	2	8	8	2	8	1	8	2	8	1	2	2	2
A962933903	A9629339	2011	1	1	2	A962	2	21	#NULL!	1	1	4	1	2640.8	4023.12	#NULL!	#NULL!	#NULL!	5420.92	5445.02	#NULL!	#NULL!	#NULL!	#NULL!	#NULL!	#NULL!	#NULL!	#NULL!	#NULL!	#NULL!	#NULL!	501	501	1	2	8	8	8	8	2	8	1	8	2	8	2	8	8	8
A962933904	A9629339	2011	1	1	2	A962	2	18	#NULL!	1	1	3	7	2640.8	3620.7	#NULL!	#NULL!	#NULL!	3893.62	4840.15	#NULL!	#NULL!	#NULL!	#NULL!	#NULL!	#NULL!	#NULL!	#NULL!	#NULL!	#NULL!	#NULL!	501	501	1	9	9	8	8	8	8	8	9	9	9	9	9	9	9	9
A962934401	A9629344	2011	1	1	2	A962	1	72	#NULL!	3	2	1	7	2640.8	2147.03	#NULL!	2756.97	#NULL!	3206.3	1565.48	#NULL!	2876.75	#NULL!	#NULL!	#NULL!	#NULL!	#NULL!	#NULL!	#NULL!	#NULL!	#NULL!	501	501	1	2	8	2	8	8	2	8	1	8	1	3	2	8	8	8
A962934402	A9629344	2011	1	1	2	A962	2	70	#NULL!	3	2	#NULL!	#NULL!	2640.8	1444.46	#NULL!	3336.35	#NULL!	1387.86	1516.52	#NULL!	3481.39	#NULL!	#NULL!	#NULL!	#NULL!	#NULL!	#NULL!	#NULL!	#NULL!	#NULL!	501	501	1	2	8	2	8	8	2	8	3	1	2	8	2	8	8	8
A962934902	A9629349	2011	1	1	2	A962	2	62	#NULL!	4	4	3	7	2640.8	1708.86	3078.4	1844.33	#NULL!	#NULL!	#NULL!	4367.5	#NULL!	#NULL!	#NULL!	#NULL!	#NULL!	#NULL!	#NULL!	#NULL!	#NULL!	#NULL!	501	501	1	2	8	1	2	2	2	8	2	3	2	8	2	8	8	8
A962934903	A9629349	2011	1	1	2	A962	1	4	57	4	4	1	#NULL!	2640.8	1580.11	#NULL!	#NULL!	#NULL!	1562.02	4438.18	#NULL!	#NULL!	#NULL!	#NULL!	#NULL!	#NULL!	#NULL!	#NULL!	#NULL!	#NULL!	#NULL!	501	501	1	2	8	8	8	8	8	8	8	8	8	8	8	8	8	8
A962935402	A9629354	2011	1	1	2	A962	2	52	#NULL!	4	4	3	1	2640.8	2857.18	#NULL!	5428.2	#NULL!	2761.58	3033.19	#NULL!	5640.05	#NULL!	#NULL!	#NULL!	#NULL!	#NULL!	#NULL!	#NULL!	#NULL!	#NULL!	501	501	1	2	8	2	8	8	2	8	1	8	2	8	2	8	8	8
A962935403	A9629354	2011	1	1	2	A962	2	22	#NULL!	4	4	3	3	2640.8	5364.16	16496.4	#NULL!	#NULL!	7227.89	7260.02	#NULL!	#NULL!	18770.3	#NULL!	#NULL!	#NULL!	#NULL!	#NULL!	#NULL!	#NULL!	#NULL!	501	501	1	2	8	8	8	8	2	8	1	8	2	8	2	8	8	8
A962935404	A9629354	2011	1	1	2	A962	2	20	#NULL!	4	4	3	3	2640.8	5364.16	#NULL!	#NULL!	#NULL!	7227.89	7260.02	#NULL!	#NULL!	#NULL!	#NULL!	#NULL!	#NULL!	#NULL!	#NULL!	#NULL!	#NULL!	#NULL!	501	501	1	2	8	8	8	8	2	8	1	8	1	1	2	8	8	8
A962935702	A9629357	2011	1	1	2	A962	2	41	#NULL!	4	4	4	7	2640.8	5807.91	#NULL!	#NULL!	#NULL!	3064.48	4249.19	#NULL!	#NULL!	#NULL!	#NULL!	#NULL!	#NULL!	#NULL!	#NULL!	#NULL!	#NULL!	#NULL!	501	501	1	2	8	2	8	8	2	8	1	8	2	8	2	8	8	8
A962935703	A9629357	2011	1	1	2	A962	1	12	#NULL!	4	4	1	#NULL!	2640.8	3833.74	#NULL!	#NULL!	#NULL!	1967.3	4030.82	#NULL!	#NULL!	#NULL!	#NULL!	#NULL!	#NULL!	#NULL!	#NULL!	#NULL!	#NULL!	#NULL!	501	501	1	1	2	8	8	8	8	8	1	8	2	8	2	8	8	8
A962935704	A9629357	2011	1	1	2	A962	1	3	42	4	4	1	#NULL!	2640.8	3160.22	#NULL!	#NULL!	#NULL!	1562.02	2958.79	#NULL!	#NULL!	#NULL!	#NULL!	#NULL!	#NULL!	#NULL!	#NULL!	#NULL!	#NULL!	#NULL!	501	501	1	8	8	8	8	8	8	8	8	8	8	8	8	8	8	8
A962937001	A9629370	2011	1	1	2	A962	2	41	#NULL!	3	3	4	2	2640.8	2903.96	#NULL!	#NULL!	#NULL!	3064.48	3186.89	#NULL!	#NULL!	#NULL!	#NULL!	#NULL!	#NULL!	#NULL!	#NULL!	#NULL!	#NULL!	#NULL!	501	501	1	1	2	2	8	8	2	8	1	8	2	8	2	8	8	8
A962937002	A9629370	2011	1	1	2	A962	1	69	#NULL!	4	3	2	3	2640.8	1329.16	#NULL!	3835.66	#NULL!	1611.15	1716.33	#NULL!	4180.67	#NULL!	#NULL!	#NULL!	#NULL!	#NULL!	#NULL!	#NULL!	#NULL!	#NULL!	501	501	1	2	8	2	8	8	1	1	1	8	2	8	2	8	8	8
A962937003	A9629370	2011	1	1	2	A962	2	67	#NULL!	4	3	1	3	2640.8	1613.96	#NULL!	2752.94	#NULL!	2337.95	1521.22	#NULL!	3117.32	#NULL!	#NULL!	#NULL!	#NULL!	#NULL!	#NULL!	#NULL!	#NULL!	#NULL!	501	501	1	2	8	2	8	8	2	8	1	8	2	8	2	8	8	8
A962937401	A9629374	2011	1	1	2	A962	1	44	#NULL!	3	3	4	5	2640.8	4570.82	#NULL!	#NULL!	#NULL!	5039.99	6349.65	#NULL!	#NULL!	#NULL!	#NULL!	#NULL!	#NULL!	#NULL!	#NULL!	#NULL!	#NULL!	#NULL!	501	501	1	2	8	2	8	8	2	8	1	8	2	8	2	8	8	8
A962937402	A9629374	2011	1	1	2	A962	2	41	#NULL!	3	3	3	7	2640.8	2903.96	11186	#NULL!	#NULL!	3064.48	3186.89	#NULL!	#NULL!	9957	#NULL!	#NULL!	#NULL!	#NULL!	#NULL!	#NULL!	#NULL!	#NULL!	501	501	1	2	8	2	8	8	2	8	1	8	2	8	2	8	8	8
A962937403	A9629374	2011	1	1	2	A962	2	13	#NULL!	3	3	1	#NULL!	2640.8	2722.07	#NULL!	#NULL!	#NULL!	2892.08	3254.1	#NULL!	#NULL!	#NULL!	#NULL!	#NULL!	#NULL!	#NULL!	#NULL!	#NULL!	#NULL!	#NULL!	501	501	1	2	8	8	8	8	8	8	1	8	2	8	2	8	8	8
A962937404	A9629374	2011	1	1	2	A962	2	11	#NULL!	3	3	1	#NULL!	2640.8	2722.07	9104.59	#NULL!	#NULL!	2892.08	3254.1	#NULL!	#NULL!	7105.93	#NULL!	#NULL!	#NULL!	#NULL!	#NULL!	#NULL!	#NULL!	#NULL!	501	501	1	2	8	8	8	8	8	8	8	8	8	8	2	8	8	8
A963926902	A9639269	2011	1	1	2	A963	2	32	#NULL!	2	2	2	7	3018.06	5567.78	#NULL!	#NULL!	#NULL!	2960.86	7575.81	#NULL!	#NULL!	#NULL!	#NULL!	#NULL!	#NULL!	#NULL!	#NULL!	#NULL!	#NULL!	#NULL!	501	501	1	2	8	8	8	8	2	8	1	8	1	1	2	8	8	8
A963927104	A9639271	2011	1	1	2	A963	1	24	#NULL!	#NULL!	#NULL!	3	7	3018.06	17324.2	19588.6	#NULL!	#NULL!	#NULL!	#NULL!	#NULL!	#NULL!	#NULL!	#NULL!	#NULL!	#NULL!	#NULL!	#NULL!	#NULL!	#NULL!	#NULL!	501	501	1	2	8	8	8	8	2	8	1	8	2	8	2	8	8	8
A963927901	A9639279	2011	1	1	2	A963	1	37	#NULL!	2	3	4	2	3018.06	4071.02	#NULL!	#NULL!	#NULL!	4082.01	5969.62	#NULL!	#NULL!	#NULL!	#NULL!	#NULL!	#NULL!	#NULL!	#NULL!	#NULL!	#NULL!	#NULL!	501	501	1	1	2	8	8	8	2	8	1	8	2	8	1	2	2	1
A963927902	A9639279	2011	1	1	2	A963	2	32	#NULL!	2	3	3	7	3018.06	2783.89	#NULL!	#NULL!	#NULL!	2960.86	3787.9	#NULL!	#NULL!	#NULL!	#NULL!	#NULL!	#NULL!	#NULL!	#NULL!	#NULL!	#NULL!	#NULL!	501	501	1	2	8	8	8	8	2	8	1	8	2	8	2	8	8	8
A963927903	A9639279	2011	1	1	2	A963	1	3	47	2	3	1	#NULL!	3018.06	1580.11	#NULL!	#NULL!	#NULL!	1562.02	2219.09	#NULL!	#NULL!	#NULL!	#NULL!	#NULL!	#NULL!	#NULL!	#NULL!	#NULL!	#NULL!	#NULL!	501	501	1	8	8	8	8	8	8	8	8	8	8	8	8	8	8	8
A963928401	A9639284	2011	1	1	2	A963	1	33	#NULL!	1	2	4	3	3018.06	3534.8	#NULL!	#NULL!	#NULL!	3712.57	7161.51	#NULL!	#NULL!	#NULL!	#NULL!	#NULL!	#NULL!	#NULL!	#NULL!	#NULL!	#NULL!	#NULL!	501	501	1	2	8	8	8	8	2	8	1	8	2	8	2	8	8	8
A963928402	A9639284	2011	1	1	2	A963	2	33	#NULL!	1	2	3	7	3018.06	2783.89	#NULL!	#NULL!	#NULL!	2960.86	3787.9	#NULL!	#NULL!	#NULL!	#NULL!	#NULL!	#NULL!	#NULL!	#NULL!	#NULL!	#NULL!	#NULL!	501	501	1	1	2	8	8	8	2	8	1	8	2	8	1	2	2	2
A963928403	A9639284	2011	1	1	2	A963	1	4	52	1	2	1	#NULL!	3018.06	1580.11	#NULL!	#NULL!	#NULL!	1562.02	2219.09	#NULL!	#NULL!	#NULL!	#NULL!	#NULL!	#NULL!	#NULL!	#NULL!	#NULL!	#NULL!	#NULL!	501	501	1	1	2	8	8	8	8	8	8	8	8	8	8	8	8	8
A963928404	A9639284	2011	1	1	2	A963	2	1	19	1	2	1	#NULL!	3018.06	1468.8	#NULL!	#NULL!	#NULL!	1410.27	2250.41	#NULL!	#NULL!	#NULL!	#NULL!	#NULL!	#NULL!	#NULL!	#NULL!	#NULL!	#NULL!	#NULL!	501	501	1	8	8	8	8	8	8	8	8	8	8	8	8	8	8	8
A963929001	A9639290	2011	1	1	2	A963	1	70	#NULL!	2	1	1	7	3018.06	3220.54	#NULL!	2756.97	#NULL!	4809.45	2348.22	#NULL!	2876.75	#NULL!	#NULL!	#NULL!	#NULL!	#NULL!	#NULL!	#NULL!	#NULL!	#NULL!	501	501	1	2	8	1	2	2	2	8	1	8	1	1	2	8	8	8
A963929002	A9639290	2011	1	1	2	A963	2	64	#NULL!	1	1	2	7	3018.06	2563.29	9235.19	1844.33	#NULL!	2708.17	2480.58	8735	1927.63	9407.66	9103.05	#NULL!	#NULL!	#NULL!	#NULL!	#NULL!	#NULL!	#NULL!	501	501	1	2	8	1	2	2	2	8	1	8	2	8	2	8	8	8
A963930101	A9639301	2011	1	1	2	A963	1	53	#NULL!	3	3	4	7	3018.06	6933.64	10395.7	4173.65	#NULL!	8043.09	8863.02	6959.35	5051.15	11239.8	8067.46	#NULL!	#NULL!	#NULL!	#NULL!	#NULL!	#NULL!	#NULL!	501	501	1	2	8	1	2	2	2	8	2	3	1	1	2	8	8	8
A963930102	A9639301	2011	1	1	2	A963	2	51	#NULL!	3	3	3	7	3018.06	4285.77	9929.62	2714.1	#NULL!	4142.37	4549.79	6845.13	2820.03	9830.07	7172.86	#NULL!	#NULL!	#NULL!	#NULL!	#NULL!	#NULL!	#NULL!	501	501	1	2	8	1	2	2	1	2	1	8	2	8	2	8	8	8
A963930501	A9639305	2011	1	1	2	A963	1	72	#NULL!	2	1	1	7	3018.06	2147.03	16392.8	2756.97	#NULL!	3206.3	1565.48	43455.1	2876.75	16712.5	47115	#NULL!	#NULL!	#NULL!	#NULL!	#NULL!	#NULL!	#NULL!	501	501	1	2	8	2	8	8	2	8	1	8	2	8	2	8	8	8
A963930502	A9639305	2011	1	1	2	A963	2	65	#NULL!	2	1	1	7	3018.06	1613.96	3280.62	1835.29	#NULL!	2337.95	1521.22	5574.05	2078.21	3520.48	5904.77	#NULL!	#NULL!	#NULL!	#NULL!	#NULL!	#NULL!	#NULL!	501	501	1	2	8	1	2	2	2	8	2	3	2	8	2	8	8	8
A963931601	A9639316	2011	1	1	2	A963	1	38	#NULL!	3	3	3	5	3018.06	4071.02	10692.9	#NULL!	#NULL!	#NULL!	#NULL!	#NULL!	#NULL!	#NULL!	#NULL!	#NULL!	#NULL!	#NULL!	#NULL!	#NULL!	#NULL!	#NULL!	501	501	1	2	8	8	8	8	2	8	1	8	1	2	2	8	8	8
A963931602	A9639316	2011	1	1	2	A963	2	37	#NULL!	3	3	4	3	3018.06	2341.64	#NULL!	#NULL!	#NULL!	#NULL!	#NULL!	#NULL!	#NULL!	#NULL!	#NULL!	#NULL!	#NULL!	#NULL!	#NULL!	#NULL!	#NULL!	#NULL!	501	501	1	2	8	8	8	8	2	8	1	8	2	8	2	8	8	8
A963931902	A9639319	2011	1	1	2	A963	1	29	#NULL!	3	3	3	6	3018.06	5149.62	#NULL!	#NULL!	#NULL!	6915.62	8931.93	#NULL!	#NULL!	#NULL!	#NULL!	#NULL!	#NULL!	#NULL!	#NULL!	#NULL!	#NULL!	#NULL!	501	501	1	2	8	8	8	8	2	8	1	8	1	1	2	8	8	8
A963931903	A9639319	2011	1	1	2	A963	1	27	#NULL!	3	3	3	1	3018.06	5149.62	9532.49	#NULL!	#NULL!	6915.62	8931.93	#NULL!	#NULL!	11160.9	#NULL!	#NULL!	#NULL!	#NULL!	#NULL!	#NULL!	#NULL!	#NULL!	501	501	1	2	8	8	8	8	2	8	1	8	2	8	2	8	8	8
A963933901	A9639339	2011	1	1	2	A963	1	40	#NULL!	2	3	3	5	3018.06	4570.82	#NULL!	#NULL!	#NULL!	5039.99	9524.47	#NULL!	#NULL!	#NULL!	#NULL!	#NULL!	#NULL!	#NULL!	#NULL!	#NULL!	#NULL!	#NULL!	501	501	1	2	8	2	8	8	2	8	1	8	2	8	2	8	8	8
A963933902	A9639339	2011	1	1	2	A963	2	37	#NULL!	2	3	4	1	3018.06	2341.64	11286.3	#NULL!	#NULL!	2457.21	4314.19	#NULL!	#NULL!	16716.9	#NULL!	#NULL!	#NULL!	#NULL!	#NULL!	#NULL!	#NULL!	#NULL!	501	501	1	2	8	8	8	8	2	8	2	3	1	1	2	8	8	8
A963933903	A9639339	2011	1	1	2	A963	2	11	#NULL!	2	3	1	#NULL!	3018.06	2722.07	9104.59	#NULL!	#NULL!	#NULL!	#NULL!	#NULL!	#NULL!	#NULL!	#NULL!	#NULL!	#NULL!	#NULL!	#NULL!	#NULL!	#NULL!	#NULL!	501	501	1	1	2	8	8	8	8	8	8	8	8	8	1	2	1	1
A963934901	A9639349	2011	1	1	2	A963	1	61	#NULL!	1	2	1	5	3018.06	1737.49	#NULL!	2256.2	#NULL!	1986.82	1849.37	#NULL!	2528.79	#NULL!	#NULL!	#NULL!	#NULL!	#NULL!	#NULL!	#NULL!	#NULL!	#NULL!	501	501	1	2	8	2	8	8	2	8	1	8	2	8	2	8	8	8
A963934902	A9639349	2011	1	1	2	A963	2	61	#NULL!	2	2	1	7	3018.06	1708.86	#NULL!	1844.33	#NULL!	1805.44	1653.72	#NULL!	1927.63	#NULL!	#NULL!	#NULL!	#NULL!	#NULL!	#NULL!	#NULL!	#NULL!	#NULL!	501	501	1	2	8	2	8	8	2	8	2	3	2	8	1	2	2	2
A963935801	A9639358	2011	1	1	2	A963	1	76	#NULL!	4	4	2	7	3018.06	1959.24	#NULL!	4135.45	#NULL!	1924.95	2087.31	#NULL!	4315.12	#NULL!	#NULL!	#NULL!	#NULL!	#NULL!	#NULL!	#NULL!	#NULL!	#NULL!	501	501	1	2	8	1	1	2	2	8	2	3	2	8	1	2	2	1
A963935802	A9639358	2011	1	1	2	A963	2	70	#NULL!	4	4	1	7	3018.06	1925.95	#NULL!	5004.53	#NULL!	1850.47	2022.02	#NULL!	5222.09	#NULL!	#NULL!	#NULL!	#NULL!	#NULL!	#NULL!	#NULL!	#NULL!	#NULL!	501	501	1	2	8	2	8	8	2	8	1	8	1	1	2	8	8	8
A963935804	A9639358	2011	1	1	2	A963	1	37	#NULL!	4	4	3	3	3018.06	5428.03	21385.7	#NULL!	#NULL!	5442.68	7959.5	#NULL!	#NULL!	27737.4	#NULL!	#NULL!	#NULL!	#NULL!	#NULL!	#NULL!	#NULL!	#NULL!	501	501	1	2	8	8	8	8	2	8	1	8	2	8	2	8	8	8
A963936601	A9639366	2011	1	1	2	A963	1	38	#NULL!	4	4	4	1	3018.06	4071.02	#NULL!	#NULL!	#NULL!	#NULL!	#NULL!	#NULL!	#NULL!	#NULL!	#NULL!	#NULL!	#NULL!	#NULL!	#NULL!	#NULL!	#NULL!	#NULL!	501	501	1	1	2	8	8	8	2	8	1	8	2	8	1	1	2	1
A963936602	A9639366	2011	1	1	2	A963	2	37	#NULL!	4	4	4	7	3018.06	2341.64	11286.3	#NULL!	#NULL!	4914.41	4314.19	#NULL!	#NULL!	11144.6	#NULL!	#NULL!	#NULL!	#NULL!	#NULL!	#NULL!	#NULL!	#NULL!	501	501	1	2	8	8	8	8	2	8	1	8	2	8	2	8	8	8
A963936603	A9639366	2011	1	1	2	A963	2	8	#NULL!	4	4	1	#NULL!	3018.06	1826.44	#NULL!	#NULL!	#NULL!	3975.42	3752.41	#NULL!	#NULL!	#NULL!	#NULL!	#NULL!	#NULL!	#NULL!	#NULL!	#NULL!	#NULL!	#NULL!	501	501	1	1	2	8	8	8	8	8	8	8	8	8	1	2	1	1
A963938101	A9639381	2011	1	1	2	A963	1	40	#NULL!	3	3	4	2	3018.06	4570.82	16576	5071.6	#NULL!	5039.99	6349.65	22658.6	6633.47	12291	27906.6	#NULL!	#NULL!	#NULL!	#NULL!	#NULL!	#NULL!	#NULL!	501	501	1	2	8	2	8	8	2	8	1	8	2	8	2	8	8	8
A963938102	A9639381	2011	1	1	2	A963	2	40	#NULL!	3	3	3	7	3018.06	2903.96	#NULL!	4049.63	#NULL!	3064.48	3186.89	#NULL!	3897.69	#NULL!	#NULL!	#NULL!	#NULL!	#NULL!	#NULL!	#NULL!	#NULL!	#NULL!	501	501	1	1	2	1	2	2	1	1	1	8	2	8	2	8	8	8
A963938103	A9639381	2011	1	1	2	A963	1	10	#NULL!	3	3	1	#NULL!	3018.06	1916.87	12010	#NULL!	#NULL!	1967.3	3023.12	#NULL!	#NULL!	6767.05	#NULL!	#NULL!	#NULL!	#NULL!	#NULL!	#NULL!	#NULL!	#NULL!	501	501	1	1	1	8	8	8	8	8	8	8	8	8	1	1	1	1
A963938104	A9639381	2011	1	1	2	A963	2	73	#NULL!	4	3	1	7	3018.06	1444.46	#NULL!	3336.35	#NULL!	1387.86	1516.52	#NULL!	3481.39	#NULL!	#NULL!	#NULL!	#NULL!	#NULL!	#NULL!	#NULL!	#NULL!	#NULL!	501	501	1	2	8	1	2	2	1	1	1	8	1	1	2	8	8	8
A964932703	A9649327	2011	1	1	1	A964	2	25	#NULL!	#NULL!	#NULL!	3	7	7210.57	18740.1	30640.6	#NULL!	#NULL!	#NULL!	#NULL!	#NULL!	#NULL!	#NULL!	#NULL!	#NULL!	#NULL!	#NULL!	#NULL!	#NULL!	#NULL!	#NULL!	512	517	1	2	8	8	8	8	2	8	1	8	2	8	2	8	8	8
A964932801	A9649328	2011	1	1	1	A964	1	61	#NULL!	2	3	3	5	7210.57	4788.6	#NULL!	6218.2	#NULL!	5475.76	5096.95	#NULL!	6969.45	#NULL!	#NULL!	#NULL!	#NULL!	#NULL!	#NULL!	#NULL!	#NULL!	#NULL!	512	517	1	2	8	2	8	8	2	8	1	8	2	8	2	8	8	8
A964932802	A9649328	2011	1	1	1	A964	2	61	#NULL!	3	3	3	7	7210.57	4709.7	#NULL!	5083.05	#NULL!	4975.89	4557.73	#NULL!	5312.64	#NULL!	#NULL!	#NULL!	#NULL!	#NULL!	#NULL!	#NULL!	#NULL!	#NULL!	512	517	1	2	8	2	8	8	2	8	1	8	1	1	2	8	8	8
A964932803	A9649328	2011	1	1	1	A964	1	32	#NULL!	2	3	4	3	7210.57	9742.08	#NULL!	#NULL!	#NULL!	10232	19737.5	#NULL!	#NULL!	#NULL!	#NULL!	#NULL!	#NULL!	#NULL!	#NULL!	#NULL!	#NULL!	#NULL!	512	517	1	2	8	8	8	8	2	8	1	8	2	8	2	8	8	8
A964933201	A9649332	2011	1	1	1	A964	1	65	#NULL!	3	2	4	1	7210.57	3663.23	14266.5	#NULL!	#NULL!	4440.41	4730.28	#NULL!	#NULL!	14976.7	#NULL!	#NULL!	#NULL!	#NULL!	#NULL!	#NULL!	#NULL!	#NULL!	512	517	1	2	8	2	8	8	2	8	1	8	2	8	2	8	8	8
A964933202	A9649332	2011	1	1	1	A964	2	61	#NULL!	3	2	3	7	7210.57	4709.7	#NULL!	10166.1	#NULL!	4975.89	4557.73	#NULL!	10625.3	#NULL!	#NULL!	#NULL!	#NULL!	#NULL!	#NULL!	#NULL!	#NULL!	#NULL!	512	517	1	2	8	2	8	8	2	8	1	8	2	8	2	8	8	8
A964933203	A9649332	2011	1	1	1	A964	1	34	#NULL!	2	2	3	7	7210.57	9742.08	36424.2	#NULL!	#NULL!	10232	19737.5	#NULL!	#NULL!	47177.7	#NULL!	#NULL!	#NULL!	#NULL!	#NULL!	#NULL!	#NULL!	#NULL!	512	517	1	2	8	8	8	8	2	8	1	8	2	8	1	1	1	1
A964933204	A9649332	2011	1	1	1	A964	2	30	#NULL!	2	2	4	3	7210.57	7672.54	#NULL!	#NULL!	#NULL!	8160.28	10439.6	#NULL!	#NULL!	#NULL!	#NULL!	#NULL!	#NULL!	#NULL!	#NULL!	#NULL!	#NULL!	#NULL!	512	517	1	2	8	8	8	8	2	8	1	8	2	8	2	8	8	8
A964933701	A9649337	2011	1	1	1	A964	1	38	#NULL!	3	3	3	1	7210.57	11219.9	#NULL!	#NULL!	#NULL!	11250.2	16452.6	#NULL!	#NULL!	#NULL!	#NULL!	#NULL!	#NULL!	#NULL!	#NULL!	#NULL!	#NULL!	#NULL!	512	517	1	2	8	8	8	8	2	8	1	8	2	8	2	8	8	8
A964933702	A9649337	2011	1	1	1	A964	2	39	#NULL!	3	3	4	1	7210.57	6453.66	#NULL!	#NULL!	#NULL!	6772.18	7926.74	#NULL!	#NULL!	#NULL!	#NULL!	#NULL!	#NULL!	#NULL!	#NULL!	#NULL!	#NULL!	#NULL!	512	517	1	2	8	8	8	8	2	8	1	8	1	1	2	8	8	8
A964934701	A9649347	2011	1	1	1	A964	2	51	#NULL!	1	2	2	3	7210.57	5905.89	13683.2	7480.19	#NULL!	#NULL!	#NULL!	18865.5	#NULL!	#NULL!	#NULL!	#NULL!	#NULL!	#NULL!	#NULL!	#NULL!	#NULL!	#NULL!	512	517	1	2	8	2	8	8	2	8	1	8	2	8	2	8	8	8
A964934702	A9649347	2011	1	1	1	A964	1	18	#NULL!	1	2	3	3	7210.57	9362.28	#NULL!	#NULL!	#NULL!	15703.5	19798.1	#NULL!	#NULL!	#NULL!	#NULL!	#NULL!	#NULL!	#NULL!	#NULL!	#NULL!	#NULL!	#NULL!	512	517	1	2	8	8	8	8	8	8	1	8	2	8	2	8	8	8
A964934703	A9649347	2011	1	1	1	A964	1	14	#NULL!	1	2	1	#NULL!	7210.57	5282.99	11033.4	#NULL!	#NULL!	8132.96	12497.8	#NULL!	#NULL!	27975.5	#NULL!	#NULL!	#NULL!	#NULL!	#NULL!	#NULL!	#NULL!	#NULL!	512	517	1	2	8	8	8	8	8	8	1	8	2	8	2	8	8	8
A964935101	A9649351	2011	1	1	1	A964	1	55	#NULL!	3	3	1	5	7210.57	6921.05	39949.3	8770.28	#NULL!	#NULL!	#NULL!	26752.7	#NULL!	#NULL!	#NULL!	#NULL!	#NULL!	#NULL!	#NULL!	#NULL!	#NULL!	#NULL!	512	517	1	2	8	2	8	8	2	8	1	8	2	8	2	8	8	8
A964935102	A9649351	2011	1	1	1	A964	2	49	#NULL!	3	3	3	6	7210.57	7384.01	#NULL!	9996.45	#NULL!	#NULL!	#NULL!	#NULL!	#NULL!	#NULL!	#NULL!	#NULL!	#NULL!	#NULL!	#NULL!	#NULL!	#NULL!	#NULL!	512	517	1	2	8	2	8	8	2	8	1	8	2	8	1	1	1	1
A964935103	A9649351	2011	1	1	1	A964	2	25	#NULL!	3	3	4	1	7210.57	12568.7	#NULL!	#NULL!	#NULL!	19200.9	19971.7	#NULL!	#NULL!	#NULL!	#NULL!	#NULL!	#NULL!	#NULL!	#NULL!	#NULL!	#NULL!	#NULL!	512	517	1	1	2	8	8	8	2	8	1	8	2	8	2	8	8	8
A964935201	A9649352	2011	1	1	1	A964	1	44	#NULL!	2	2	3	6	7210.57	12597.4	#NULL!	24612.4	#NULL!	13890.5	17499.9	#NULL!	28010.8	#NULL!	#NULL!	#NULL!	#NULL!	#NULL!	#NULL!	#NULL!	#NULL!	#NULL!	512	517	1	2	8	2	8	8	2	8	1	8	2	8	2	8	8	8
A964935202	A9649352	2011	1	1	1	A964	2	41	#NULL!	2	2	3	3	7210.57	8003.44	#NULL!	#NULL!	#NULL!	8445.84	8783.22	#NULL!	#NULL!	#NULL!	#NULL!	#NULL!	#NULL!	#NULL!	#NULL!	#NULL!	#NULL!	#NULL!	512	517	1	2	8	2	8	8	2	8	1	8	2	8	2	8	8	8
A964935203	A9649352	2011	1	1	1	A964	2	18	#NULL!	2	2	3	7	7210.57	9978.82	26411.3	#NULL!	#NULL!	10731	13339.7	#NULL!	#NULL!	49756.2	#NULL!	#NULL!	#NULL!	#NULL!	#NULL!	#NULL!	#NULL!	#NULL!	512	517	1	1	2	8	8	8	8	8	1	8	2	8	2	8	8	8
A964935204	A9649352	2011	1	1	1	A964	1	15	#NULL!	2	2	2	7	7210.57	9362.28	#NULL!	#NULL!	#NULL!	10469	15098.7	#NULL!	#NULL!	#NULL!	#NULL!	#NULL!	#NULL!	#NULL!	#NULL!	#NULL!	#NULL!	#NULL!	512	517	1	2	8	8	8	8	8	8	1	8	2	8	1	1	1	1
A964935301	A9649353	2011	1	1	1	A964	2	47	#NULL!	1	2	3	6	7210.57	7384.01	13844.3	9996.45	#NULL!	13876.5	17096.8	19258	10518.8	26976.8	20165.7	#NULL!	#NULL!	#NULL!	#NULL!	#NULL!	#NULL!	#NULL!	512	517	1	2	8	2	8	8	2	8	1	8	2	8	2	8	8	8
A964935302	A9649353	2011	1	1	1	A964	1	18	#NULL!	1	2	3	7	7210.57	9362.28	#NULL!	#NULL!	#NULL!	#NULL!	#NULL!	#NULL!	#NULL!	#NULL!	#NULL!	#NULL!	#NULL!	#NULL!	#NULL!	#NULL!	#NULL!	#NULL!	512	517	1	2	8	8	8	8	8	8	1	8	2	8	2	8	8	8
A964935901	A9649359	2011	1	1	1	A964	1	48	#NULL!	2	3	4	2	7210.57	10944.6	35937	16424.4	#NULL!	12234.5	18071.6	44497.2	19899.5	43354.5	56360.1	#NULL!	#NULL!	#NULL!	#NULL!	#NULL!	#NULL!	#NULL!	512	517	1	2	8	2	8	8	2	8	1	8	2	8	2	8	8	8
A964935902	A9649359	2011	1	1	1	A964	2	40	#NULL!	3	3	3	2	7210.57	8003.44	#NULL!	11161	#NULL!	8445.84	8783.22	#NULL!	10742.2	#NULL!	#NULL!	#NULL!	#NULL!	#NULL!	#NULL!	#NULL!	#NULL!	#NULL!	512	517	1	2	8	2	8	8	2	8	1	8	2	8	2	8	8	8
A964935903	A9649359	2011	1	1	1	A964	2	8	#NULL!	3	3	1	#NULL!	7210.57	5033.76	#NULL!	#NULL!	#NULL!	5478.22	6894.54	#NULL!	#NULL!	#NULL!	#NULL!	#NULL!	#NULL!	#NULL!	#NULL!	#NULL!	#NULL!	#NULL!	512	517	1	1	2	8	8	8	8	8	8	8	8	8	1	2	1	2
A964935904	A9649359	2011	1	1	1	A964	1	4	51	3	3	1	#NULL!	7210.57	4354.86	#NULL!	#NULL!	#NULL!	4305.01	6115.92	#NULL!	#NULL!	#NULL!	#NULL!	#NULL!	#NULL!	#NULL!	#NULL!	#NULL!	#NULL!	#NULL!	512	517	1	1	2	8	8	8	8	8	8	8	8	8	8	8	8	8
A964936001	A9649360	2011	1	1	1	A964	1	69	#NULL!	3	2	2	6	7210.57	6105.38	#NULL!	#NULL!	#NULL!	7400.68	7883.8	#NULL!	#NULL!	#NULL!	#NULL!	#NULL!	#NULL!	#NULL!	#NULL!	#NULL!	#NULL!	#NULL!	512	517	1	2	8	2	8	8	2	8	1	8	2	8	2	8	8	8
A964936002	A9649360	2011	1	1	1	A964	2	62	#NULL!	3	2	1	5	7210.57	7849.51	#NULL!	20332.2	#NULL!	8293.15	7596.22	#NULL!	21250.6	#NULL!	#NULL!	#NULL!	#NULL!	#NULL!	#NULL!	#NULL!	#NULL!	#NULL!	512	517	1	2	8	2	8	8	2	8	1	8	2	8	2	8	8	8
A964936005	A9649360	2011	1	1	1	A964	2	88	#NULL!	3	2	#NULL!	#NULL!	7210.57	7000.18	#NULL!	#NULL!	#NULL!	6956.47	6965.99	#NULL!	#NULL!	#NULL!	#NULL!	#NULL!	#NULL!	#NULL!	#NULL!	#NULL!	#NULL!	#NULL!	512	517	1	2	8	1	2	2	2	8	3	2	2	8	2	8	8	8
A964936202	A9649362	2011	1	1	1	A964	2	61	#NULL!	1	1	1	7	7210.57	9419.41	16968.4	10166.1	#NULL!	4975.89	9115.46	24074.1	10625.3	17285.3	25088.4	#NULL!	#NULL!	#NULL!	#NULL!	#NULL!	#NULL!	#NULL!	512	517	1	2	8	2	8	8	2	8	1	8	2	8	2	8	8	8
A964937101	A9649371	2011	1	1	1	A964	2	49	#NULL!	1	1	3	6	7210.57	7384.01	#NULL!	9996.45	#NULL!	6938.27	8548.42	#NULL!	10518.8	#NULL!	#NULL!	#NULL!	#NULL!	#NULL!	#NULL!	#NULL!	#NULL!	#NULL!	512	517	1	1	2	2	8	8	2	8	2	3	2	8	2	8	8	8
A964937102	A9649371	2011	1	1	1	A964	1	9	#NULL!	1	1	1	#NULL!	7210.57	5304.16	#NULL!	#NULL!	#NULL!	4851.96	7103.54	#NULL!	#NULL!	#NULL!	#NULL!	#NULL!	#NULL!	#NULL!	#NULL!	#NULL!	#NULL!	#NULL!	512	517	1	2	8	8	8	8	8	8	8	8	8	8	2	8	8	8
A964937302	A9649373	2011	1	1	1	A964	2	38	#NULL!	1	2	4	3	7210.57	6453.66	#NULL!	#NULL!	#NULL!	6772.18	7926.74	#NULL!	#NULL!	#NULL!	#NULL!	#NULL!	#NULL!	#NULL!	#NULL!	#NULL!	#NULL!	#NULL!	512	517	1	2	8	8	8	8	2	8	1	8	2	8	2	8	8	8
A964937303	A9649373	2011	1	1	1	A964	1	7	#NULL!	1	2	1	#NULL!	7210.57	5304.16	#NULL!	#NULL!	#NULL!	4851.96	7103.54	#NULL!	#NULL!	#NULL!	#NULL!	#NULL!	#NULL!	#NULL!	#NULL!	#NULL!	#NULL!	#NULL!	512	517	1	2	8	8	8	8	8	8	8	8	8	8	2	8	8	8
A964937304	A9649373	2011	1	1	1	A964	1	3	41	1	2	1	#NULL!	7210.57	4354.86	#NULL!	#NULL!	#NULL!	4305.01	6115.92	#NULL!	#NULL!	#NULL!	#NULL!	#NULL!	#NULL!	#NULL!	#NULL!	#NULL!	#NULL!	#NULL!	512	517	1	8	8	8	8	8	8	8	8	8	8	8	8	8	8	8
A964937702	A9649377	2011	1	1	1	A964	2	35	#NULL!	3	3	4	1	7210.57	9680.49	46658.6	#NULL!	#NULL!	#NULL!	#NULL!	#NULL!	#NULL!	#NULL!	#NULL!	#NULL!	#NULL!	#NULL!	#NULL!	#NULL!	#NULL!	#NULL!	512	517	1	2	8	8	8	8	2	8	1	8	2	8	2	8	8	8
A964937703	A9649377	2011	1	1	1	A964	1	10	#NULL!	3	3	1	#NULL!	7210.57	7924.48	#NULL!	#NULL!	#NULL!	#NULL!	#NULL!	#NULL!	#NULL!	#NULL!	#NULL!	#NULL!	#NULL!	#NULL!	#NULL!	#NULL!	#NULL!	#NULL!	512	517	1	2	8	8	8	8	8	8	8	8	8	8	2	8	8	8
A964937704	A9649377	2011	1	1	1	A964	1	5	69	3	3	1	#NULL!	7210.57	7956.24	#NULL!	#NULL!	#NULL!	#NULL!	#NULL!	#NULL!	#NULL!	#NULL!	#NULL!	#NULL!	#NULL!	#NULL!	#NULL!	#NULL!	#NULL!	#NULL!	512	517	1	2	8	8	8	8	8	8	8	8	8	8	8	8	8	8
A964937705	A9649377	2011	1	1	1	A964	2	67	#NULL!	4	3	1	6	7210.57	6672.23	#NULL!	#NULL!	#NULL!	#NULL!	#NULL!	#NULL!	#NULL!	#NULL!	#NULL!	#NULL!	#NULL!	#NULL!	#NULL!	#NULL!	#NULL!	#NULL!	512	517	1	2	8	2	8	8	2	8	1	8	2	8	2	8	8	8
A964938001	A9649380	2011	1	1	1	A964	2	51	#NULL!	2	3	1	6	7210.57	11811.8	#NULL!	7480.19	#NULL!	8562.43	9404.57	#NULL!	7772.12	#NULL!	#NULL!	#NULL!	#NULL!	#NULL!	#NULL!	#NULL!	#NULL!	#NULL!	512	517	1	2	8	2	8	8	2	8	1	8	2	8	2	8	8	8
A964938003	A9649380	2011	1	1	1	A964	1	16	#NULL!	3	3	2	7	7210.57	17794.6	16108.3	#NULL!	#NULL!	15703.5	19798.1	#NULL!	#NULL!	45481.4	#NULL!	#NULL!	#NULL!	#NULL!	#NULL!	#NULL!	#NULL!	#NULL!	512	517	1	2	8	8	8	8	8	8	1	8	2	8	2	8	8	8
A964938102	A9649381	2011	1	1	1	A964	2	46	#NULL!	1	1	3	3	7210.57	14768	27688.5	19992.9	#NULL!	#NULL!	#NULL!	38516	#NULL!	#NULL!	#NULL!	#NULL!	#NULL!	#NULL!	#NULL!	#NULL!	#NULL!	#NULL!	512	517	1	2	8	1	2	2	2	8	1	8	1	1	2	8	8	8
A964938301	A9649383	2011	1	1	1	A964	1	47	#NULL!	2	2	4	2	7210.57	10944.6	#NULL!	16424.4	#NULL!	12234.5	18071.6	#NULL!	19899.5	#NULL!	#NULL!	#NULL!	#NULL!	#NULL!	#NULL!	#NULL!	#NULL!	#NULL!	512	517	1	2	8	2	8	8	2	8	1	8	2	8	2	8	8	8
A964938302	A9649383	2011	1	1	1	A964	2	45	#NULL!	1	2	3	3	7210.57	7384.01	#NULL!	9996.45	#NULL!	6938.27	8548.42	#NULL!	10518.8	#NULL!	#NULL!	#NULL!	#NULL!	#NULL!	#NULL!	#NULL!	#NULL!	#NULL!	512	517	1	2	8	2	8	8	2	8	4	3	2	8	2	8	8	8
A964938303	A9649383	2011	1	1	1	A964	2	19	#NULL!	2	2	3	3	7210.57	9978.82	#NULL!	#NULL!	#NULL!	10731	13339.7	#NULL!	#NULL!	#NULL!	#NULL!	#NULL!	#NULL!	#NULL!	#NULL!	#NULL!	#NULL!	#NULL!	512	517	1	1	2	8	8	8	2	8	1	8	2	8	2	8	8	8
A964938304	A9649383	2011	1	1	1	A964	2	17	#NULL!	2	2	2	3	7210.57	9978.82	#NULL!	#NULL!	#NULL!	10731	13339.7	#NULL!	#NULL!	#NULL!	#NULL!	#NULL!	#NULL!	#NULL!	#NULL!	#NULL!	#NULL!	#NULL!	512	517	1	1	2	8	8	8	8	8	1	8	2	8	2	8	8	8
A965932301	A9659323	2011	1	1	2	A965	1	36	#NULL!	3	3	4	3	2347.38	4071.02	10692.9	#NULL!	#NULL!	4082.01	5969.62	#NULL!	#NULL!	13868.7	#NULL!	#NULL!	#NULL!	#NULL!	#NULL!	#NULL!	#NULL!	#NULL!	501	501	1	1	2	8	8	8	2	8	1	8	2	8	1	1	2	1
A965932302	A9659323	2011	1	1	2	A965	2	35	#NULL!	3	3	4	2	2347.38	2341.64	#NULL!	#NULL!	#NULL!	2457.21	2876.13	#NULL!	#NULL!	#NULL!	#NULL!	#NULL!	#NULL!	#NULL!	#NULL!	#NULL!	#NULL!	#NULL!	501	501	1	2	8	8	8	8	2	8	1	8	1	1	2	8	8	8
A965932303	A9659323	2011	1	1	2	A965	1	3	47	3	3	1	#NULL!	2347.38	1580.11	#NULL!	#NULL!	#NULL!	1562.02	2219.09	#NULL!	#NULL!	#NULL!	#NULL!	#NULL!	#NULL!	#NULL!	#NULL!	#NULL!	#NULL!	#NULL!	501	501	1	8	8	8	8	8	8	8	8	8	8	8	8	8	8	8
A965932701	A9659327	2011	1	1	2	A965	2	80	#NULL!	3	2	1	7	2347.38	1523.96	#NULL!	#NULL!	#NULL!	1514.44	1516.52	#NULL!	#NULL!	#NULL!	#NULL!	#NULL!	#NULL!	#NULL!	#NULL!	#NULL!	#NULL!	#NULL!	501	501	1	2	8	1	2	1	2	8	1	8	2	8	1	1	1	1
A965933001	A9659330	2011	1	1	2	A965	2	62	#NULL!	2	2	1	7	2347.38	1708.86	3078.4	1844.33	#NULL!	1805.44	1653.72	4367.5	1927.63	3135.89	4551.52	#NULL!	#NULL!	#NULL!	#NULL!	#NULL!	#NULL!	#NULL!	501	501	1	2	8	2	8	8	2	8	1	8	2	8	2	8	8	8
A965933201	A9659332	2011	1	1	2	A965	2	73	#NULL!	3	2	1	7	2347.38	1444.46	#NULL!	3336.35	#NULL!	1387.86	1516.52	#NULL!	3481.39	#NULL!	#NULL!	#NULL!	#NULL!	#NULL!	#NULL!	#NULL!	#NULL!	#NULL!	501	501	1	2	8	1	2	2	2	8	3	2	1	2	2	8	8	8
A965933302	A9659333	2011	1	1	2	A965	2	80	#NULL!	1	1	3	7	2347.38	1523.96	#NULL!	3336.35	#NULL!	1514.44	1516.52	#NULL!	3481.39	#NULL!	#NULL!	#NULL!	#NULL!	#NULL!	#NULL!	#NULL!	#NULL!	#NULL!	501	501	1	2	8	1	3	2	2	8	2	2	2	8	2	8	8	8
A965933401	A9659334	2011	1	1	2	A965	1	54	#NULL!	4	4	4	3	2347.38	3466.82	#NULL!	#NULL!	#NULL!	4021.54	4431.51	#NULL!	#NULL!	#NULL!	#NULL!	#NULL!	#NULL!	#NULL!	#NULL!	#NULL!	#NULL!	#NULL!	501	501	1	2	8	2	8	8	2	8	1	8	2	8	2	8	8	8
A965933402	A9659334	2011	1	1	2	A965	2	54	#NULL!	4	4	3	3	2347.38	2142.89	12412	4071.15	#NULL!	2071.19	2274.89	20535.4	4230.04	12287.6	21518.6	#NULL!	#NULL!	#NULL!	#NULL!	#NULL!	#NULL!	#NULL!	501	501	1	1	2	2	8	8	2	8	1	8	2	8	2	8	8	8
A965933403	A9659334	2011	1	1	2	A965	2	25	#NULL!	4	4	4	1	2347.38	4560.42	9264.64	#NULL!	#NULL!	4311.91	4511.42	#NULL!	#NULL!	10692.4	#NULL!	#NULL!	#NULL!	#NULL!	#NULL!	#NULL!	#NULL!	#NULL!	501	501	1	2	8	8	8	8	2	8	1	8	2	8	2	8	8	8
A965933404	A9659334	2011	1	1	2	A965	1	22	#NULL!	4	4	4	3	2347.38	4331.06	#NULL!	#NULL!	#NULL!	5726.56	8753.52	#NULL!	#NULL!	#NULL!	#NULL!	#NULL!	#NULL!	#NULL!	#NULL!	#NULL!	#NULL!	#NULL!	501	501	1	2	8	8	8	8	2	8	1	8	2	8	2	8	8	8
A965933405	A9659334	2011	1	1	2	A965	2	81	#NULL!	4	4	1	7	2347.38	1523.96	#NULL!	5004.53	#NULL!	1514.44	1516.52	#NULL!	5222.09	#NULL!	#NULL!	#NULL!	#NULL!	#NULL!	#NULL!	#NULL!	#NULL!	#NULL!	501	501	1	2	8	2	8	8	2	8	2	3	2	8	2	8	8	8
A965933801	A9659338	2011	1	1	2	A965	1	37	#NULL!	4	4	4	1	2347.38	4071.02	#NULL!	#NULL!	#NULL!	#NULL!	#NULL!	#NULL!	#NULL!	#NULL!	#NULL!	#NULL!	#NULL!	#NULL!	#NULL!	#NULL!	#NULL!	#NULL!	501	501	1	2	8	8	8	8	2	8	1	8	1	2	1	2	2	2
A965933802	A9659338	2011	1	1	2	A965	2	77	#NULL!	4	4	1	7	2347.38	1523.96	#NULL!	3336.35	#NULL!	#NULL!	#NULL!	#NULL!	#NULL!	#NULL!	#NULL!	#NULL!	#NULL!	#NULL!	#NULL!	#NULL!	#NULL!	#NULL!	501	501	1	2	8	2	8	8	2	8	3	3	1	2	1	2	1	1
A965934601	A9659346	2011	1	1	2	A965	1	33	#NULL!	3	3	4	1	2347.38	7069.6	#NULL!	#NULL!	#NULL!	7425.15	14323	#NULL!	#NULL!	#NULL!	#NULL!	#NULL!	#NULL!	#NULL!	#NULL!	#NULL!	#NULL!	#NULL!	501	501	1	2	8	8	8	8	2	8	1	8	2	8	1	1	2	2
A965934701	A9659347	2011	1	1	2	A965	2	76	#NULL!	3	2	1	7	2347.38	1523.96	#NULL!	#NULL!	#NULL!	1514.44	1516.52	#NULL!	#NULL!	#NULL!	#NULL!	#NULL!	#NULL!	#NULL!	#NULL!	#NULL!	#NULL!	#NULL!	501	501	1	2	8	2	8	8	2	8	1	8	1	1	2	8	8	8
A965934702	A9659347	2011	1	1	2	A965	1	37	#NULL!	2	2	3	5	2347.38	4071.02	16039.3	#NULL!	#NULL!	4082.01	5969.62	#NULL!	#NULL!	20803	#NULL!	#NULL!	#NULL!	#NULL!	#NULL!	#NULL!	#NULL!	#NULL!	501	501	1	2	8	8	8	8	2	8	1	8	2	8	2	8	8	8
A965934703	A9659347	2011	1	1	2	A965	2	35	#NULL!	1	2	1	7	2347.38	2341.64	#NULL!	#NULL!	#NULL!	2457.21	2876.13	#NULL!	#NULL!	#NULL!	#NULL!	#NULL!	#NULL!	#NULL!	#NULL!	#NULL!	#NULL!	#NULL!	501	501	1	2	8	8	8	8	2	8	1	8	2	8	2	8	8	8
A965935401	A9659354	2011	1	1	2	A965	1	59	#NULL!	2	3	2	5	2347.38	3766.84	10871.4	3182.19	#NULL!	4432.13	4394.96	9706.9	3679	12006.5	10720.7	#NULL!	#NULL!	#NULL!	#NULL!	#NULL!	#NULL!	#NULL!	501	501	1	2	8	2	8	8	2	8	2	3	1	2	2	8	8	8
A965935402	A9659354	2011	1	1	2	A965	2	55	#NULL!	3	3	1	7	2347.38	2464.78	#NULL!	2198.77	#NULL!	2322.29	2903.8	#NULL!	2214.01	#NULL!	#NULL!	#NULL!	#NULL!	#NULL!	#NULL!	#NULL!	#NULL!	#NULL!	501	501	1	2	8	2	8	8	2	8	2	3	2	8	2	8	8	8
A965935502	A9659355	2011	1	1	2	A965	2	42	#NULL!	2	3	3	7	2347.38	5807.91	#NULL!	8099.26	#NULL!	3064.48	4780.34	#NULL!	7795.37	#NULL!	#NULL!	#NULL!	#NULL!	#NULL!	#NULL!	#NULL!	#NULL!	#NULL!	501	501	1	2	8	2	8	8	2	8	1	8	2	8	2	8	8	8
A965935503	A9659355	2011	1	1	2	A965	1	13	#NULL!	2	3	1	#NULL!	2347.38	3833.74	#NULL!	#NULL!	#NULL!	1967.3	4534.67	#NULL!	#NULL!	#NULL!	#NULL!	#NULL!	#NULL!	#NULL!	#NULL!	#NULL!	#NULL!	#NULL!	501	501	1	2	8	8	8	8	8	8	1	8	2	8	1	2	1	1
A965935901	A9659359	2011	1	1	2	A965	1	65	#NULL!	4	3	3	7	2347.38	1329.16	#NULL!	2557.11	#NULL!	1611.15	1716.33	#NULL!	2787.11	#NULL!	#NULL!	#NULL!	#NULL!	#NULL!	#NULL!	#NULL!	#NULL!	#NULL!	501	501	1	2	8	2	8	8	2	8	1	8	2	8	2	8	8	8
A965935902	A9659359	2011	1	1	2	A965	2	59	#NULL!	3	3	3	7	2347.38	1643.19	#NULL!	2198.77	#NULL!	1548.19	1935.86	#NULL!	2214.01	#NULL!	#NULL!	#NULL!	#NULL!	#NULL!	#NULL!	#NULL!	#NULL!	#NULL!	501	501	1	2	8	1	3	2	2	8	1	8	2	8	2	8	8	8
A965936601	A9659366	2011	1	1	2	A965	1	42	#NULL!	4	4	3	6	2347.38	4570.82	16576	5071.6	#NULL!	5039.99	6349.65	22658.6	6633.47	15363.8	27906.6	#NULL!	#NULL!	#NULL!	#NULL!	#NULL!	#NULL!	#NULL!	501	501	1	2	8	2	8	8	2	8	1	8	2	8	1	2	1	1
A965936602	A9659366	2011	1	1	2	A965	2	14	#NULL!	4	4	1	#NULL!	2347.38	2722.07	13656.9	#NULL!	#NULL!	2892.08	3254.1	#NULL!	#NULL!	8882.41	#NULL!	#NULL!	#NULL!	#NULL!	#NULL!	#NULL!	#NULL!	#NULL!	501	501	1	2	8	8	8	8	8	8	1	8	1	1	2	8	8	8
A965936603	A9659366	2011	1	1	2	A965	1	12	#NULL!	4	4	1	#NULL!	2347.38	1916.87	#NULL!	#NULL!	#NULL!	1967.3	3023.12	#NULL!	#NULL!	#NULL!	#NULL!	#NULL!	#NULL!	#NULL!	#NULL!	#NULL!	#NULL!	#NULL!	501	501	1	2	8	8	8	8	8	8	1	8	2	8	1	1	1	1
A965936604	A9659366	2011	1	1	2	A965	2	76	#NULL!	4	4	1	7	2347.38	1523.96	#NULL!	3336.35	#NULL!	1514.44	1516.52	#NULL!	3481.39	#NULL!	#NULL!	#NULL!	#NULL!	#NULL!	#NULL!	#NULL!	#NULL!	#NULL!	501	501	1	2	8	2	8	8	2	8	1	8	2	8	2	8	8	8
A965936605	A9659366	2011	1	1	2	A965	2	54	#NULL!	4	4	3	3	2347.38	2142.89	#NULL!	2714.1	#NULL!	2071.19	2274.89	#NULL!	2820.03	#NULL!	#NULL!	#NULL!	#NULL!	#NULL!	#NULL!	#NULL!	#NULL!	#NULL!	501	501	1	2	8	1	3	2	2	8	1	8	2	8	2	8	8	8
A965936901	A9659369	2011	1	1	2	A965	1	76	#NULL!	2	1	1	7	2347.38	1469.43	32785.6	2756.97	#NULL!	1443.71	1565.48	86910.2	2876.75	33425.1	94230	#NULL!	#NULL!	#NULL!	#NULL!	#NULL!	#NULL!	#NULL!	501	501	1	2	8	1	3	2	2	8	1	8	1	1	1	2	2	1
A965936902	A9659369	2011	1	1	2	A965	2	69	#NULL!	1	1	1	7	2347.38	1613.96	#NULL!	1835.29	#NULL!	2337.95	1521.22	#NULL!	2078.21	#NULL!	#NULL!	#NULL!	#NULL!	#NULL!	#NULL!	#NULL!	#NULL!	#NULL!	501	501	1	2	8	2	8	8	2	8	1	8	2	8	2	8	8	8
A965937601	A9659376	2011	1	1	2	A965	1	31	#NULL!	1	2	4	2	2347.38	3534.8	#NULL!	#NULL!	#NULL!	3712.57	7161.51	#NULL!	#NULL!	#NULL!	#NULL!	#NULL!	#NULL!	#NULL!	#NULL!	#NULL!	#NULL!	#NULL!	501	501	1	2	8	8	8	8	2	8	1	8	2	8	2	8	8	8
A965937602	A9659376	2011	1	1	2	A965	2	29	#NULL!	1	2	3	7	2347.38	4560.42	#NULL!	#NULL!	#NULL!	4311.91	4511.42	#NULL!	#NULL!	#NULL!	#NULL!	#NULL!	#NULL!	#NULL!	#NULL!	#NULL!	#NULL!	#NULL!	501	501	1	2	8	8	8	8	2	8	1	8	2	8	2	8	8	8
A965937603	A9659376	2011	1	1	2	A965	2	3	38	2	2	1	#NULL!	2347.38	1468.8	#NULL!	#NULL!	#NULL!	1410.27	2250.41	#NULL!	#NULL!	#NULL!	#NULL!	#NULL!	#NULL!	#NULL!	#NULL!	#NULL!	#NULL!	#NULL!	501	501	1	8	8	8	8	8	8	8	8	8	8	8	8	8	8	8
A965937801	A9659378	2011	1	1	2	A965	1	36	#NULL!	2	2	3	3	2347.38	4071.02	#NULL!	#NULL!	#NULL!	4082.01	5969.62	#NULL!	#NULL!	#NULL!	#NULL!	#NULL!	#NULL!	#NULL!	#NULL!	#NULL!	#NULL!	#NULL!	501	501	1	2	8	8	8	8	2	8	1	8	1	1	2	8	8	8
A965937802	A9659378	2011	1	1	2	A965	2	35	#NULL!	2	2	3	7	2347.38	2341.64	#NULL!	#NULL!	#NULL!	2457.21	2876.13	#NULL!	#NULL!	#NULL!	#NULL!	#NULL!	#NULL!	#NULL!	#NULL!	#NULL!	#NULL!	#NULL!	501	501	1	1	2	8	8	8	2	8	1	8	1	1	1	2	1	1
A965937803	A9659378	2011	1	1	2	A965	1	6	75	2	2	1	#NULL!	2347.38	1924.55	#NULL!	#NULL!	#NULL!	1760.48	2577.44	#NULL!	#NULL!	#NULL!	#NULL!	#NULL!	#NULL!	#NULL!	#NULL!	#NULL!	#NULL!	#NULL!	501	501	1	2	8	8	8	8	8	8	8	8	8	8	1	2	1	1
A965937804	A9659378	2011	1	1	2	A965	2	4	53	2	2	1	#NULL!	2347.38	1468.8	#NULL!	#NULL!	#NULL!	1410.27	2250.41	#NULL!	#NULL!	#NULL!	#NULL!	#NULL!	#NULL!	#NULL!	#NULL!	#NULL!	#NULL!	#NULL!	501	501	1	2	8	8	8	8	8	8	8	8	8	8	8	8	8	8
A965938101	A9659381	2011	1	1	2	A965	2	74	#NULL!	3	2	1	7	2347.38	1444.46	#NULL!	3336.35	#NULL!	2775.71	2274.78	#NULL!	3481.39	#NULL!	#NULL!	#NULL!	#NULL!	#NULL!	#NULL!	#NULL!	#NULL!	#NULL!	501	501	1	2	8	2	8	8	2	8	2	3	2	8	2	8	8	8
A965938102	A9659381	2011	1	1	2	A965	2	38	#NULL!	1	2	4	2	2347.38	2341.64	11286.3	#NULL!	#NULL!	#NULL!	#NULL!	#NULL!	#NULL!	#NULL!	#NULL!	#NULL!	#NULL!	#NULL!	#NULL!	#NULL!	#NULL!	#NULL!	501	501	1	2	8	8	8	8	2	8	1	8	2	8	1	2	1	1
A965938103	A9659381	2011	1	1	2	A965	1	5	60	2	2	1	#NULL!	2347.38	1924.55	#NULL!	#NULL!	#NULL!	3520.96	3866.16	#NULL!	#NULL!	#NULL!	#NULL!	#NULL!	#NULL!	#NULL!	#NULL!	#NULL!	#NULL!	#NULL!	501	501	1	2	8	8	8	8	8	8	8	8	8	8	8	8	8	8
A965938302	A9659383	2011	1	1	2	A965	2	42	#NULL!	2	3	4	7	2347.38	5807.91	11186	8099.26	#NULL!	6128.95	4780.34	15796.5	7795.37	7467.75	16081	#NULL!	#NULL!	#NULL!	#NULL!	#NULL!	#NULL!	#NULL!	501	501	1	2	8	2	8	8	2	8	1	8	1	1	2	8	8	8
A965938303	A9659383	2011	1	1	2	A965	1	10	#NULL!	2	3	1	#NULL!	2347.38	3833.74	8006.65	#NULL!	#NULL!	3934.6	4534.67	#NULL!	#NULL!	5075.29	#NULL!	#NULL!	#NULL!	#NULL!	#NULL!	#NULL!	#NULL!	#NULL!	501	501	1	2	8	8	8	8	8	8	8	8	8	8	2	8	8	8
A966931501	A9669315	2011	1	1	1	A966	1	74	#NULL!	4	3	2	7	7543.21	6132.79	#NULL!	7875.03	#NULL!	9158.51	4471.66	#NULL!	8217.18	#NULL!	#NULL!	#NULL!	#NULL!	#NULL!	#NULL!	#NULL!	#NULL!	#NULL!	512	517	1	2	8	2	8	8	2	8	1	8	2	8	1	1	1	1
A966931502	A9669315	2011	1	1	1	A966	2	70	#NULL!	4	3	1	7	7543.21	4125.99	#NULL!	9530.01	#NULL!	3964.29	4331.8	#NULL!	9944.3	#NULL!	#NULL!	#NULL!	#NULL!	#NULL!	#NULL!	#NULL!	#NULL!	#NULL!	512	517	1	2	8	2	8	8	2	8	1	8	2	8	2	8	8	8
A966931503	A9669315	2011	1	1	1	A966	1	38	#NULL!	3	3	3	3	7543.21	11628.5	45814.9	#NULL!	#NULL!	11659.9	17051.7	#NULL!	#NULL!	59422	#NULL!	#NULL!	#NULL!	#NULL!	#NULL!	#NULL!	#NULL!	#NULL!	512	517	1	2	8	8	8	8	2	8	1	8	2	8	1	1	1	1
A966932101	A9669321	2011	1	1	1	A966	1	44	#NULL!	2	3	3	3	7543.21	13056.2	31565.2	14486.6	#NULL!	14396.3	18137.2	43148.2	18947.9	35108.2	53141.9	#NULL!	#NULL!	#NULL!	#NULL!	#NULL!	#NULL!	#NULL!	512	517	1	2	8	2	8	8	2	8	1	8	1	2	2	8	8	8
A966932102	A9669321	2011	1	1	1	A966	2	40	#NULL!	2	3	3	2	7543.21	8294.9	#NULL!	11567.4	#NULL!	8753.41	9103.08	#NULL!	11133.4	#NULL!	#NULL!	#NULL!	#NULL!	#NULL!	#NULL!	#NULL!	#NULL!	#NULL!	512	517	1	2	8	2	8	8	2	8	1	8	2	8	2	8	8	8
A966932103	A9669321	2011	1	1	1	A966	2	15	#NULL!	2	3	1	7	7543.21	10342.2	#NULL!	#NULL!	#NULL!	11121.8	13825.5	#NULL!	#NULL!	#NULL!	#NULL!	#NULL!	#NULL!	#NULL!	#NULL!	#NULL!	#NULL!	#NULL!	512	517	1	2	8	8	8	8	8	8	1	8	2	8	2	8	8	8
A966932104	A9669321	2011	1	1	1	A966	1	12	#NULL!	2	3	1	#NULL!	7543.21	5475.38	22870.3	#NULL!	#NULL!	5619.42	8635.27	#NULL!	#NULL!	19329.5	#NULL!	#NULL!	#NULL!	#NULL!	#NULL!	#NULL!	#NULL!	#NULL!	512	517	1	2	8	8	8	8	8	8	1	8	2	8	2	8	8	8
A966932302	A9669323	2011	1	1	1	A966	2	36	#NULL!	1	2	3	7	7543.21	13377.4	#NULL!	#NULL!	#NULL!	14037.6	19443	#NULL!	#NULL!	#NULL!	#NULL!	#NULL!	#NULL!	#NULL!	#NULL!	#NULL!	#NULL!	#NULL!	512	517	1	2	8	8	8	8	2	8	1	8	1	1	2	8	8	8
A966932701	A9669327	2011	1	1	1	A966	2	56	#NULL!	2	2	1	6	7543.21	4693.63	10896.8	#NULL!	#NULL!	4422.27	5529.63	#NULL!	#NULL!	10769.6	#NULL!	#NULL!	#NULL!	#NULL!	#NULL!	#NULL!	#NULL!	#NULL!	512	517	1	2	8	1	1	1	2	8	1	8	2	8	2	8	8	8
A966933201	A9669332	2011	1	1	1	A966	1	62	#NULL!	1	1	1	5	7543.21	9925.97	#NULL!	#NULL!	#NULL!	11350.3	10565.1	#NULL!	#NULL!	#NULL!	#NULL!	#NULL!	#NULL!	#NULL!	#NULL!	#NULL!	#NULL!	#NULL!	512	517	1	2	8	2	8	8	2	8	1	8	2	8	2	8	8	8
A966933701	A9669337	2011	1	1	1	A966	2	38	#NULL!	4	4	4	1	7543.21	6688.68	16119.2	#NULL!	#NULL!	7018.8	8215.41	#NULL!	#NULL!	15916.8	#NULL!	#NULL!	#NULL!	#NULL!	#NULL!	#NULL!	#NULL!	#NULL!	512	517	1	1	2	8	8	8	2	8	1	8	2	8	1	2	1	1
A966934402	A9669344	2011	1	1	1	A966	2	30	#NULL!	2	3	4	1	7543.21	15903.9	#NULL!	#NULL!	#NULL!	8457.45	19418.5	#NULL!	#NULL!	#NULL!	#NULL!	#NULL!	#NULL!	#NULL!	#NULL!	#NULL!	#NULL!	#NULL!	512	517	1	2	8	8	8	8	2	8	1	8	2	8	1	1	1	1
A966935101	A9669351	2011	1	1	1	A966	1	69	#NULL!	3	2	4	6	7543.21	5694.95	#NULL!	14608.3	#NULL!	6903.17	7353.81	#NULL!	15922.3	#NULL!	#NULL!	#NULL!	#NULL!	#NULL!	#NULL!	#NULL!	#NULL!	#NULL!	512	517	1	2	8	2	8	8	2	8	1	8	2	8	2	8	8	8
A966935102	A9669351	2011	1	1	1	A966	2	68	#NULL!	3	2	1	7	7543.21	6915.21	28112.4	#NULL!	#NULL!	10017.2	6517.83	#NULL!	#NULL!	30167.8	#NULL!	#NULL!	#NULL!	#NULL!	#NULL!	#NULL!	#NULL!	#NULL!	512	517	1	2	8	2	8	8	2	8	1	8	2	8	2	8	8	8
A966935401	A9669354	2011	1	1	1	A966	1	62	#NULL!	3	3	1	3	7543.21	4962.99	17319.6	6444.64	#NULL!	#NULL!	#NULL!	25231	#NULL!	#NULL!	#NULL!	#NULL!	#NULL!	#NULL!	#NULL!	#NULL!	#NULL!	#NULL!	512	517	1	2	8	2	8	8	1	2	1	8	1	1	1	1	2	1
A966935402	A9669354	2011	1	1	1	A966	2	58	#NULL!	3	3	2	7	7543.21	4693.63	#NULL!	6280.59	#NULL!	8844.54	11059.3	#NULL!	12648.3	#NULL!	#NULL!	#NULL!	#NULL!	#NULL!	#NULL!	#NULL!	#NULL!	#NULL!	512	517	1	2	8	1	1	2	2	8	1	8	2	8	1	2	2	2
A966936001	A9669360	2011	1	1	1	A966	2	81	#NULL!	3	1	1	7	7543.21	4353.06	#NULL!	#NULL!	#NULL!	4325.88	4331.8	#NULL!	#NULL!	#NULL!	#NULL!	#NULL!	#NULL!	#NULL!	#NULL!	#NULL!	#NULL!	#NULL!	512	517	1	2	8	2	8	8	2	8	1	8	2	8	2	8	8	8
A966936101	A9669361	2011	1	1	1	A966	1	56	#NULL!	2	3	3	1	7543.21	9564.13	#NULL!	#NULL!	#NULL!	8440	11158.9	#NULL!	#NULL!	#NULL!	#NULL!	#NULL!	#NULL!	#NULL!	#NULL!	#NULL!	#NULL!	#NULL!	512	517	1	1	2	2	8	8	2	8	1	8	2	8	2	8	8	8
A966936102	A9669361	2011	1	1	1	A966	2	55	#NULL!	3	3	3	3	7543.21	6258.17	21793.6	12561.2	#NULL!	4422.27	7372.84	30851.9	12648.3	21539.1	30897.4	#NULL!	#NULL!	#NULL!	#NULL!	#NULL!	#NULL!	#NULL!	512	517	1	1	2	2	8	8	2	8	1	8	2	8	2	8	8	8
A966936501	A9669365	2011	1	1	1	A966	1	62	#NULL!	1	2	2	7	7543.21	9925.97	#NULL!	#NULL!	#NULL!	11350.3	10565.1	#NULL!	#NULL!	#NULL!	#NULL!	#NULL!	#NULL!	#NULL!	#NULL!	#NULL!	#NULL!	#NULL!	512	517	1	2	8	2	8	8	1	2	1	8	1	1	2	8	8	8
A966936502	A9669365	2011	1	1	1	A966	2	52	#NULL!	1	2	1	6	7543.21	12241.9	#NULL!	15505.2	#NULL!	11832.3	12996.1	#NULL!	16110.3	#NULL!	#NULL!	#NULL!	#NULL!	#NULL!	#NULL!	#NULL!	#NULL!	#NULL!	512	517	1	2	8	2	8	8	2	8	1	8	1	1	2	8	8	8
A966936601	A9669366	2011	1	1	1	A966	2	76	#NULL!	2	1	1	7	7543.21	13059.2	#NULL!	#NULL!	#NULL!	12977.6	12995.4	#NULL!	#NULL!	#NULL!	#NULL!	#NULL!	#NULL!	#NULL!	#NULL!	#NULL!	#NULL!	#NULL!	512	517	1	2	8	2	8	8	2	8	1	8	2	8	2	8	8	8
A966937701	A9669377	2011	1	1	1	A966	1	59	#NULL!	#NULL!	#NULL!	3	5	7543.21	7173.09	10351	9089.66	#NULL!	8440	8369.21	13863.5	10508.8	11431.8	15311.3	#NULL!	#NULL!	#NULL!	#NULL!	#NULL!	#NULL!	#NULL!	512	517	1	2	8	2	8	8	1	1	1	8	2	8	2	8	8	8
A966938202	A9669382	2011	1	1	1	A966	1	41	#NULL!	1	2	3	1	7543.21	13056.2	#NULL!	14486.6	#NULL!	#NULL!	#NULL!	#NULL!	#NULL!	#NULL!	#NULL!	#NULL!	#NULL!	#NULL!	#NULL!	#NULL!	#NULL!	#NULL!	512	517	1	2	8	1	2	2	2	8	2	3	1	3	2	8	8	8
A966938301	A9669383	2011	1	1	1	A966	2	40	#NULL!	1	2	3	3	7543.21	8294.9	15975.9	11567.4	#NULL!	8753.41	13654.6	22560.7	11133.4	14220.7	22966.9	#NULL!	#NULL!	#NULL!	#NULL!	#NULL!	#NULL!	#NULL!	512	517	1	2	8	2	8	8	2	8	1	8	2	8	2	8	8	8
A966938302	A9669383	2011	1	1	1	A966	2	12	#NULL!	1	2	1	#NULL!	7543.21	7775.37	13003.2	#NULL!	#NULL!	8260.97	13942.6	#NULL!	#NULL!	10148.7	#NULL!	#NULL!	#NULL!	#NULL!	#NULL!	#NULL!	#NULL!	#NULL!	512	517	1	2	8	8	8	8	8	8	1	8	2	8	2	8	8	8
A967933701	A9679337	2011	1	1	1	A967	1	61	#NULL!	1	1	2	7	9283.95	4962.99	#NULL!	12889.3	#NULL!	5675.17	5282.56	#NULL!	14446.5	#NULL!	#NULL!	#NULL!	#NULL!	#NULL!	#NULL!	#NULL!	#NULL!	#NULL!	512	517	1	2	8	2	8	8	2	8	1	8	2	8	2	8	8	8
A967933702	A9679337	2011	1	1	1	A967	2	59	#NULL!	1	1	1	6	9283.95	4693.63	#NULL!	#NULL!	#NULL!	4422.27	5529.63	#NULL!	#NULL!	#NULL!	#NULL!	#NULL!	#NULL!	#NULL!	#NULL!	#NULL!	#NULL!	#NULL!	512	517	1	2	8	2	8	8	2	8	1	8	1	1	2	8	8	8
A967933703	A9679337	2011	1	1	1	A967	2	4	59	1	1	1	#NULL!	9283.95	4195.49	#NULL!	#NULL!	#NULL!	4028.3	6428.11	#NULL!	#NULL!	#NULL!	#NULL!	#NULL!	#NULL!	#NULL!	#NULL!	#NULL!	#NULL!	#NULL!	512	517	1	2	8	8	8	8	8	8	8	8	8	8	8	8	8	8
A967933704	A9679337	2011	1	1	1	A967	2	2	29	1	1	1	#NULL!	9283.95	4195.49	#NULL!	#NULL!	#NULL!	4028.3	6428.11	#NULL!	#NULL!	#NULL!	#NULL!	#NULL!	#NULL!	#NULL!	#NULL!	#NULL!	#NULL!	#NULL!	512	517	1	8	8	8	8	8	8	8	8	8	8	8	8	8	8	8
A967933802	A9679338	2011	1	1	1	A967	2	48	#NULL!	1	2	3	7	9283.95	15305.8	#NULL!	20721	#NULL!	7190.94	17719.4	#NULL!	21803.8	#NULL!	#NULL!	#NULL!	#NULL!	#NULL!	#NULL!	#NULL!	#NULL!	#NULL!	512	517	1	2	8	2	8	8	2	8	1	8	2	8	2	8	8	8
A967934801	A9679348	2011	1	1	1	A967	2	46	#NULL!	2	2	3	7	9283.95	7652.91	#NULL!	10360.5	#NULL!	7190.94	8859.72	#NULL!	10901.9	#NULL!	#NULL!	#NULL!	#NULL!	#NULL!	#NULL!	#NULL!	#NULL!	#NULL!	512	517	1	2	8	2	8	8	2	8	1	8	2	8	2	8	8	8
A967935002	A9679350	2011	1	1	1	A967	2	45	#NULL!	3	3	3	5	9283.95	10203.9	#NULL!	#NULL!	#NULL!	7190.94	11813	#NULL!	#NULL!	#NULL!	#NULL!	#NULL!	#NULL!	#NULL!	#NULL!	#NULL!	#NULL!	#NULL!	512	517	1	2	8	2	8	8	2	8	1	8	2	8	2	8	8	8
A967935003	A9679350	2011	1	1	1	A967	1	23	#NULL!	3	3	3	2	9283.95	16495.1	55953.2	#NULL!	#NULL!	16357.4	23766.3	#NULL!	#NULL!	64409.4	#NULL!	#NULL!	#NULL!	#NULL!	#NULL!	#NULL!	#NULL!	#NULL!	512	517	1	2	8	8	8	8	1	2	1	8	2	8	2	8	8	8
A967935004	A9679350	2011	1	1	1	A967	2	19	#NULL!	3	3	3	3	9283.95	13789.6	#NULL!	#NULL!	#NULL!	11121.8	18434	#NULL!	#NULL!	#NULL!	#NULL!	#NULL!	#NULL!	#NULL!	#NULL!	#NULL!	#NULL!	#NULL!	512	517	1	2	8	8	8	8	2	8	1	8	2	8	2	8	8	8
A967935301	A9679353	2011	1	1	1	A967	1	49	#NULL!	1	2	3	5	9283.95	11343.2	27934.2	17022.6	#NULL!	12680.1	18729.7	46117.7	20624.2	33700	58412.5	#NULL!	#NULL!	#NULL!	#NULL!	#NULL!	#NULL!	#NULL!	512	517	1	2	8	2	8	8	2	8	1	8	2	8	2	8	8	8
A967935302	A9679353	2011	1	1	1	A967	2	50	#NULL!	1	2	3	1	9283.95	6120.97	#NULL!	7752.6	#NULL!	5916.17	6498.04	#NULL!	8055.16	#NULL!	#NULL!	#NULL!	#NULL!	#NULL!	#NULL!	#NULL!	#NULL!	#NULL!	512	517	1	2	8	2	8	8	2	8	1	8	2	8	1	2	2	2
A967935303	A9679353	2011	1	1	1	A967	1	25	#NULL!	1	2	4	1	9283.95	14709.4	20421.5	#NULL!	#NULL!	19549.1	22424	#NULL!	#NULL!	23910.1	#NULL!	#NULL!	#NULL!	#NULL!	#NULL!	#NULL!	#NULL!	#NULL!	512	517	1	2	8	8	8	8	2	8	1	8	2	8	2	8	8	8
A967935501	A9679355	2011	1	1	1	A967	1	42	#NULL!	4	4	4	2	9283.95	13056.2	#NULL!	14486.6	#NULL!	#NULL!	#NULL!	#NULL!	#NULL!	#NULL!	#NULL!	#NULL!	#NULL!	#NULL!	#NULL!	#NULL!	#NULL!	#NULL!	512	517	1	2	8	2	8	8	2	8	1	8	2	8	2	8	8	8
A967935502	A9679355	2011	1	1	1	A967	2	36	#NULL!	4	4	3	1	9283.95	6688.68	#NULL!	#NULL!	#NULL!	#NULL!	#NULL!	#NULL!	#NULL!	#NULL!	#NULL!	#NULL!	#NULL!	#NULL!	#NULL!	#NULL!	#NULL!	#NULL!	512	517	1	2	8	8	8	8	2	8	1	8	2	8	1	1	1	1
A967935503	A9679355	2011	1	1	1	A967	1	5	71	4	4	1	#NULL!	9283.95	5497.32	#NULL!	#NULL!	#NULL!	#NULL!	#NULL!	#NULL!	#NULL!	#NULL!	#NULL!	#NULL!	#NULL!	#NULL!	#NULL!	#NULL!	#NULL!	#NULL!	512	517	1	2	8	8	8	8	8	8	8	8	8	8	8	8	8	8
A967935801	A9679358	2011	1	1	1	A967	1	40	#NULL!	3	3	4	2	9283.95	13056.2	#NULL!	14486.6	#NULL!	#NULL!	#NULL!	#NULL!	#NULL!	#NULL!	#NULL!	#NULL!	#NULL!	#NULL!	#NULL!	#NULL!	#NULL!	#NULL!	512	517	1	2	8	2	8	8	2	8	1	8	2	8	2	8	8	8
A967935802	A9679358	2011	1	1	1	A967	2	38	#NULL!	3	3	4	7	9283.95	6688.68	32238.5	#NULL!	#NULL!	10528.2	10953.9	#NULL!	#NULL!	23875.3	#NULL!	#NULL!	#NULL!	#NULL!	#NULL!	#NULL!	#NULL!	#NULL!	512	517	1	2	8	8	8	8	2	8	1	8	2	8	2	8	8	8
A967935803	A9679358	2011	1	1	1	A967	2	12	#NULL!	3	3	1	#NULL!	9283.95	7775.37	26006.5	#NULL!	#NULL!	12391.5	12393.4	#NULL!	#NULL!	15223.1	#NULL!	#NULL!	#NULL!	#NULL!	#NULL!	#NULL!	#NULL!	#NULL!	512	517	1	1	2	8	8	8	8	8	1	8	2	8	1	2	2	1
A967935804	A9679358	2011	1	1	1	A967	2	4	59	3	3	1	#NULL!	9283.95	4195.49	#NULL!	#NULL!	#NULL!	6042.46	8570.81	#NULL!	#NULL!	#NULL!	#NULL!	#NULL!	#NULL!	#NULL!	#NULL!	#NULL!	#NULL!	#NULL!	512	517	1	2	8	8	8	8	8	8	8	8	8	8	8	8	8	8
A967936401	A9679364	2011	1	1	1	A967	1	65	#NULL!	3	3	2	3	9283.95	5694.95	#NULL!	#NULL!	#NULL!	6903.17	6536.72	#NULL!	#NULL!	#NULL!	#NULL!	#NULL!	#NULL!	#NULL!	#NULL!	#NULL!	#NULL!	#NULL!	512	517	1	2	8	1	1	2	2	8	2	3	2	8	2	8	8	8
A967936402	A9679364	2011	1	1	1	A967	2	62	#NULL!	3	3	2	3	9283.95	7321.82	26379.5	10536.3	#NULL!	7735.64	6298.28	24950.8	11012.2	26872.2	26002.1	#NULL!	#NULL!	#NULL!	#NULL!	#NULL!	#NULL!	#NULL!	512	517	1	2	8	1	2	2	2	8	1	8	2	8	2	8	8	8
A967936404	A9679364	2011	1	1	1	A967	1	8	#NULL!	3	3	1	#NULL!	9283.95	8245.98	#NULL!	#NULL!	#NULL!	7542.98	9816.31	#NULL!	#NULL!	#NULL!	#NULL!	#NULL!	#NULL!	#NULL!	#NULL!	#NULL!	#NULL!	#NULL!	512	517	1	2	8	8	8	8	8	8	8	8	8	8	2	8	8	8
A967936601	A9679366	2011	1	1	1	A967	1	32	#NULL!	3	3	4	2	9283.95	10096.9	#NULL!	#NULL!	#NULL!	10604.6	20456.2	#NULL!	#NULL!	#NULL!	#NULL!	#NULL!	#NULL!	#NULL!	#NULL!	#NULL!	#NULL!	#NULL!	512	517	1	2	8	8	8	8	2	8	1	8	2	8	1	1	1	1
A967936602	A9679366	2011	1	1	1	A967	2	58	#NULL!	3	3	3	7	9283.95	4693.63	#NULL!	6280.59	#NULL!	4422.27	5529.63	#NULL!	6324.14	#NULL!	#NULL!	#NULL!	#NULL!	#NULL!	#NULL!	#NULL!	#NULL!	#NULL!	512	517	1	2	8	2	8	8	2	8	1	8	2	8	2	8	8	8
A967936603	A9679366	2011	1	1	1	A967	2	31	#NULL!	3	3	4	1	9283.95	7951.94	57223.9	#NULL!	#NULL!	8457.45	10819.8	#NULL!	#NULL!	63478.1	#NULL!	#NULL!	#NULL!	#NULL!	#NULL!	#NULL!	#NULL!	#NULL!	512	517	1	2	8	8	8	8	2	8	1	8	2	8	2	8	8	8
A967936604	A9679366	2011	1	1	1	A967	1	29	#NULL!	3	3	4	2	9283.95	14709.4	#NULL!	#NULL!	#NULL!	19549.1	22424	#NULL!	#NULL!	#NULL!	#NULL!	#NULL!	#NULL!	#NULL!	#NULL!	#NULL!	#NULL!	#NULL!	512	517	1	2	8	8	8	8	2	8	1	8	2	8	2	8	8	8
A967936701	A9679367	2011	1	1	1	A967	1	34	#NULL!	1	2	4	1	9283.95	10096.9	56626	#NULL!	#NULL!	10604.6	20456.2	#NULL!	#NULL!	65340.8	#NULL!	#NULL!	#NULL!	#NULL!	#NULL!	#NULL!	#NULL!	#NULL!	512	517	1	1	1	8	8	8	2	8	2	3	2	8	1	1	2	1
A967936702	A9679367	2011	1	1	1	A967	2	37	#NULL!	1	2	4	3	9283.95	6688.68	#NULL!	#NULL!	#NULL!	7018.8	8215.41	#NULL!	#NULL!	#NULL!	#NULL!	#NULL!	#NULL!	#NULL!	#NULL!	#NULL!	#NULL!	#NULL!	512	517	1	1	2	8	8	8	1	2	1	8	2	8	1	1	2	2
A967936703	A9679367	2011	1	1	1	A967	1	4	56	2	2	1	#NULL!	9283.95	4513.45	#NULL!	#NULL!	#NULL!	4461.78	6338.64	#NULL!	#NULL!	#NULL!	#NULL!	#NULL!	#NULL!	#NULL!	#NULL!	#NULL!	#NULL!	#NULL!	512	517	1	2	8	8	8	8	8	8	8	8	8	8	8	8	8	8
A967936704	A9679367	2011	1	1	1	A967	2	3	36	2	2	1	#NULL!	9283.95	4195.49	#NULL!	#NULL!	#NULL!	4028.3	6428.11	#NULL!	#NULL!	#NULL!	#NULL!	#NULL!	#NULL!	#NULL!	#NULL!	#NULL!	#NULL!	#NULL!	512	517	1	8	8	8	8	8	8	8	8	8	8	8	8	8	8	8
A967936705	A9679367	2011	1	1	1	A967	2	62	#NULL!	3	2	1	7	9283.95	4881.22	#NULL!	5268.16	#NULL!	5157.09	4723.71	#NULL!	5506.11	#NULL!	#NULL!	#NULL!	#NULL!	#NULL!	#NULL!	#NULL!	#NULL!	#NULL!	512	517	1	2	8	2	8	8	2	8	1	8	2	8	2	8	8	8
A967937001	A9679370	2011	1	1	1	A967	1	42	#NULL!	4	4	3	1	9283.95	13056.2	#NULL!	14486.6	#NULL!	14396.3	18137.2	#NULL!	18947.9	#NULL!	#NULL!	#NULL!	#NULL!	#NULL!	#NULL!	#NULL!	#NULL!	#NULL!	512	517	1	2	8	2	8	8	2	8	1	8	2	8	2	8	8	8
A967937002	A9679370	2011	1	1	1	A967	2	42	#NULL!	4	4	4	2	9283.95	8294.9	31951.7	11567.4	#NULL!	8753.41	9103.08	45121.3	11133.4	28441.3	45933.8	#NULL!	#NULL!	#NULL!	#NULL!	#NULL!	#NULL!	#NULL!	512	517	1	2	8	2	8	8	2	8	1	8	2	8	2	8	8	8
A967937003	A9679370	2011	1	1	1	A967	2	9	#NULL!	4	4	1	#NULL!	9283.95	5217.07	#NULL!	#NULL!	#NULL!	5677.72	7145.62	#NULL!	#NULL!	#NULL!	#NULL!	#NULL!	#NULL!	#NULL!	#NULL!	#NULL!	#NULL!	#NULL!	512	517	1	2	8	8	8	8	8	8	8	8	8	8	2	8	8	8
A967937501	A9679375	2011	1	1	1	A967	1	64	#NULL!	3	3	2	7	9283.95	9925.97	34639.2	#NULL!	#NULL!	11350.3	10565.1	#NULL!	#NULL!	35475.2	#NULL!	#NULL!	#NULL!	#NULL!	#NULL!	#NULL!	#NULL!	#NULL!	512	517	1	2	8	1	2	2	2	8	3	3	1	3	2	8	8	8
A967937502	A9679375	2011	1	1	1	A967	2	56	#NULL!	2	3	1	5	9283.95	9387.25	#NULL!	12561.2	#NULL!	8844.54	11059.3	#NULL!	12648.3	#NULL!	#NULL!	#NULL!	#NULL!	#NULL!	#NULL!	#NULL!	#NULL!	#NULL!	512	517	1	2	8	2	8	8	2	8	1	8	1	1	2	8	8	8
A967937801	A9679378	2011	1	1	1	A967	1	66	#NULL!	2	2	2	6	9283.95	5062.18	14786	7304.15	#NULL!	6136.15	6536.72	11677.1	7961.15	15522.1	12181.5	#NULL!	#NULL!	#NULL!	#NULL!	#NULL!	#NULL!	#NULL!	512	517	1	1	1	2	8	8	2	8	1	8	2	8	1	1	2	2
A967937802	A9679378	2011	1	1	1	A967	2	59	#NULL!	1	2	1	7	9283.95	6258.17	21793.6	6280.59	#NULL!	5896.36	7372.84	15425.9	6324.14	21539.1	15448.7	#NULL!	#NULL!	#NULL!	#NULL!	#NULL!	#NULL!	#NULL!	512	517	1	2	8	2	8	8	2	8	1	8	2	8	2	8	8	8
A967937803	A9679378	2011	1	1	1	A967	2	34	#NULL!	1	2	4	3	9283.95	10602.6	#NULL!	#NULL!	#NULL!	11276.6	14426.4	#NULL!	#NULL!	#NULL!	#NULL!	#NULL!	#NULL!	#NULL!	#NULL!	#NULL!	#NULL!	#NULL!	512	517	1	2	8	8	8	8	2	8	1	8	1	1	2	8	8	8
A968930301	A9689303	2011	1	1	1	A968	1	52	#NULL!	4	4	3	3	8620.81	9902.67	#NULL!	11921.7	#NULL!	11487.2	12658.2	#NULL!	14428.2	#NULL!	#NULL!	#NULL!	#NULL!	#NULL!	#NULL!	#NULL!	#NULL!	#NULL!	512	517	1	2	8	2	8	8	2	8	1	8	2	8	2	8	8	8
A968930302	A9689303	2011	1	1	1	A968	2	53	#NULL!	4	4	3	3	8620.81	6120.97	#NULL!	7752.6	#NULL!	5916.17	6498.04	#NULL!	8055.16	#NULL!	#NULL!	#NULL!	#NULL!	#NULL!	#NULL!	#NULL!	#NULL!	#NULL!	512	517	1	2	8	2	8	8	2	8	2	3	2	8	2	8	8	8
A968930303	A9689303	2011	1	1	1	A968	2	26	#NULL!	4	4	4	2	8620.81	13026.4	#NULL!	#NULL!	#NULL!	12316.6	12886.5	#NULL!	#NULL!	#NULL!	#NULL!	#NULL!	#NULL!	#NULL!	#NULL!	#NULL!	#NULL!	#NULL!	512	517	1	1	2	8	8	8	2	8	1	8	2	8	1	1	2	1
A968930304	A9689303	2011	1	1	1	A968	2	23	#NULL!	4	4	3	7	8620.81	11491.7	47120.5	#NULL!	#NULL!	15484.4	15553.2	#NULL!	#NULL!	53615.8	#NULL!	#NULL!	#NULL!	#NULL!	#NULL!	#NULL!	#NULL!	#NULL!	512	517	1	2	8	8	8	8	2	8	1	8	2	8	2	8	8	8
A968930402	A9689304	2011	1	1	1	A968	2	57	#NULL!	2	2	1	6	8620.81	4693.63	10896.8	6280.59	#NULL!	4422.27	5529.63	15425.9	6324.14	10769.6	15448.7	#NULL!	#NULL!	#NULL!	#NULL!	#NULL!	#NULL!	#NULL!	512	517	1	2	8	1	2	2	2	8	1	8	2	8	2	8	8	8
A968931001	A9689310	2011	1	1	1	A968	2	81	#NULL!	4	4	1	7	8620.81	4353.06	#NULL!	#NULL!	#NULL!	4325.88	4331.8	#NULL!	#NULL!	#NULL!	#NULL!	#NULL!	#NULL!	#NULL!	#NULL!	#NULL!	#NULL!	#NULL!	512	517	1	2	8	2	8	8	2	8	1	8	2	8	2	8	8	8
A968931201	A9689312	2011	1	1	1	A968	1	68	#NULL!	#NULL!	#NULL!	1	7	8620.81	3796.63	#NULL!	7304.15	#NULL!	#NULL!	#NULL!	#NULL!	#NULL!	#NULL!	#NULL!	#NULL!	#NULL!	#NULL!	#NULL!	#NULL!	#NULL!	#NULL!	512	517	1	2	8	2	8	8	2	8	1	8	2	8	2	8	8	8
A968933001	A9689330	2011	1	1	1	A968	2	78	#NULL!	#NULL!	#NULL!	1	7	8620.81	4353.06	#NULL!	#NULL!	#NULL!	4325.88	4331.8	#NULL!	#NULL!	#NULL!	#NULL!	#NULL!	#NULL!	#NULL!	#NULL!	#NULL!	#NULL!	#NULL!	512	517	1	1	1	2	8	8	2	8	1	8	2	8	1	2	2	2
A968933301	A9689333	2011	1	1	1	A968	1	46	#NULL!	1	1	2	5	8620.81	11343.2	37245.7	17022.6	#NULL!	#NULL!	#NULL!	23058.8	#NULL!	#NULL!	#NULL!	#NULL!	#NULL!	#NULL!	#NULL!	#NULL!	#NULL!	#NULL!	512	517	1	2	8	1	2	2	2	8	1	8	2	8	2	8	8	8
A968933302	A9689333	2011	1	1	1	A968	2	37	#NULL!	1	1	3	1	8620.81	6688.68	#NULL!	#NULL!	#NULL!	14037.6	10953.9	#NULL!	#NULL!	#NULL!	#NULL!	#NULL!	#NULL!	#NULL!	#NULL!	#NULL!	#NULL!	#NULL!	512	517	1	2	8	8	8	8	2	8	1	8	2	8	2	8	8	8
A968933304	A9689333	2011	1	1	1	A968	1	8	#NULL!	1	1	1	#NULL!	8620.81	5497.32	#NULL!	#NULL!	#NULL!	10057.3	9816.31	#NULL!	#NULL!	#NULL!	#NULL!	#NULL!	#NULL!	#NULL!	#NULL!	#NULL!	#NULL!	#NULL!	512	517	1	2	8	8	8	8	8	8	8	8	8	8	2	8	8	8
A968933601	A9689336	2011	1	1	1	A968	1	36	#NULL!	3	3	4	2	8620.81	11628.5	15271.6	#NULL!	#NULL!	11659.9	17051.7	#NULL!	#NULL!	19807.3	#NULL!	#NULL!	#NULL!	#NULL!	#NULL!	#NULL!	#NULL!	#NULL!	512	517	1	1	2	8	8	8	2	8	1	8	2	8	2	8	8	8
A968933602	A9689336	2011	1	1	1	A968	2	35	#NULL!	3	3	4	1	8620.81	6688.68	16119.2	#NULL!	#NULL!	7018.8	8215.41	#NULL!	#NULL!	15916.8	#NULL!	#NULL!	#NULL!	#NULL!	#NULL!	#NULL!	#NULL!	#NULL!	512	517	1	2	8	8	8	8	2	8	1	8	1	1	2	8	8	8
A968934501	A9689345	2011	1	1	1	A968	1	59	#NULL!	1	2	1	7	8620.81	17946.9	#NULL!	#NULL!	#NULL!	18965.1	19536.9	#NULL!	#NULL!	#NULL!	#NULL!	#NULL!	#NULL!	#NULL!	#NULL!	#NULL!	#NULL!	#NULL!	512	517	1	2	8	2	8	8	2	8	1	8	2	8	2	8	8	8
A968934802	A9689348	2011	1	1	1	A968	2	73	#NULL!	2	1	1	7	8620.81	4125.99	#NULL!	#NULL!	#NULL!	3964.29	4331.8	#NULL!	#NULL!	#NULL!	#NULL!	#NULL!	#NULL!	#NULL!	#NULL!	#NULL!	#NULL!	#NULL!	512	517	1	2	8	1	2	2	2	8	1	8	1	1	2	8	8	8
A968935201	A9689352	2011	1	1	1	A968	2	54	#NULL!	1	2	1	3	8620.81	6120.97	28363.1	7752.6	#NULL!	7888.22	8664.05	39105.1	16110.3	28078.7	40977.3	#NULL!	#NULL!	#NULL!	#NULL!	#NULL!	#NULL!	#NULL!	512	517	1	2	8	1	2	2	2	8	1	8	2	8	2	8	8	8
A968935202	A9689352	2011	1	1	1	A968	2	20	#NULL!	1	2	3	7	8620.81	11491.7	23560.3	#NULL!	#NULL!	19686.1	20074.5	#NULL!	#NULL!	26807.9	#NULL!	#NULL!	#NULL!	#NULL!	#NULL!	#NULL!	#NULL!	#NULL!	512	517	1	9	9	8	8	8	2	8	1	8	2	8	2	8	8	8
A968935203	A9689352	2011	1	1	1	A968	1	53	#NULL!	1	2	1	5	8620.81	9902.67	#NULL!	11921.7	#NULL!	#NULL!	#NULL!	#NULL!	#NULL!	#NULL!	#NULL!	#NULL!	#NULL!	#NULL!	#NULL!	#NULL!	#NULL!	#NULL!	512	517	1	2	8	2	8	8	2	8	1	8	2	8	2	8	8	8
A968935204	A9689352	2011	1	1	1	A968	1	22	#NULL!	1	2	3	7	8620.81	12371.3	#NULL!	#NULL!	#NULL!	19024.9	23766.3	#NULL!	#NULL!	#NULL!	#NULL!	#NULL!	#NULL!	#NULL!	#NULL!	#NULL!	#NULL!	#NULL!	512	517	1	2	8	8	8	8	2	8	1	8	2	8	2	8	8	8
A968935601	A9689356	2011	1	1	1	A968	2	66	#NULL!	2	1	1	7	8620.81	4610.14	9370.81	5242.36	#NULL!	6678.15	4345.22	15921.8	5936.23	10055.9	16866.5	#NULL!	#NULL!	#NULL!	#NULL!	#NULL!	#NULL!	#NULL!	512	517	1	2	8	1	2	1	2	8	2	3	2	8	2	8	8	8
A968935701	A9689357	2011	1	1	1	A968	1	50	#NULL!	1	1	2	6	8620.81	9902.67	44541.4	11921.7	#NULL!	17230.8	18987.3	39757.5	14428.2	48158.4	46088	#NULL!	#NULL!	#NULL!	#NULL!	#NULL!	#NULL!	#NULL!	512	517	1	2	8	2	8	8	2	8	1	8	2	8	2	8	8	8
A968935702	A9689357	2011	1	1	1	A968	2	49	#NULL!	1	1	1	7	8620.81	7652.91	#NULL!	10360.5	#NULL!	10786.4	13289.6	#NULL!	10901.9	#NULL!	#NULL!	#NULL!	#NULL!	#NULL!	#NULL!	#NULL!	#NULL!	#NULL!	512	517	1	2	8	2	8	8	2	8	1	8	2	8	2	8	8	8
A968935703	A9689357	2011	1	1	1	A968	1	21	#NULL!	1	1	3	7	8620.81	12371.3	#NULL!	#NULL!	#NULL!	#NULL!	#NULL!	#NULL!	#NULL!	#NULL!	#NULL!	#NULL!	#NULL!	#NULL!	#NULL!	#NULL!	#NULL!	#NULL!	512	517	1	2	8	8	8	8	2	8	1	8	2	8	2	8	8	8
A968936802	A9689368	2011	1	1	1	A968	2	74	#NULL!	1	1	1	7	8620.81	8251.97	#NULL!	19060	#NULL!	11892.9	12995.4	#NULL!	19888.6	#NULL!	#NULL!	#NULL!	#NULL!	#NULL!	#NULL!	#NULL!	#NULL!	#NULL!	512	517	1	2	8	2	8	8	2	8	1	8	2	8	2	8	8	8
A969926501	A9699265	2011	1	1	2	A969	1	38	#NULL!	3	3	4	1	2779.79	4071.02	10692.9	#NULL!	#NULL!	4082.01	5969.62	#NULL!	#NULL!	13868.7	#NULL!	#NULL!	#NULL!	#NULL!	#NULL!	#NULL!	#NULL!	#NULL!	501	501	1	1	2	8	8	8	2	8	1	8	2	8	1	2	2	2
A969926502	A9699265	2011	1	1	2	A969	2	32	#NULL!	3	3	3	7	2779.79	2783.89	#NULL!	#NULL!	#NULL!	2960.86	3787.9	#NULL!	#NULL!	#NULL!	#NULL!	#NULL!	#NULL!	#NULL!	#NULL!	#NULL!	#NULL!	#NULL!	501	501	1	2	8	8	8	8	2	8	1	8	2	8	1	1	1	1
A969926503	A9699265	2011	1	1	2	A969	1	2	30	3	3	1	#NULL!	2779.79	1580.11	#NULL!	#NULL!	#NULL!	1562.02	2219.09	#NULL!	#NULL!	#NULL!	#NULL!	#NULL!	#NULL!	#NULL!	#NULL!	#NULL!	#NULL!	#NULL!	501	501	1	8	8	8	8	8	8	8	8	8	8	8	8	8	8	8
A969927503	A9699275	2011	1	1	2	A969	2	17	#NULL!	1	1	2	7	2779.79	10862.1	#NULL!	#NULL!	#NULL!	3893.62	8066.92	#NULL!	#NULL!	#NULL!	#NULL!	#NULL!	#NULL!	#NULL!	#NULL!	#NULL!	#NULL!	#NULL!	501	501	1	2	8	8	8	8	8	8	1	8	2	8	2	8	8	8
A969927504	A9699275	2011	1	1	2	A969	2	15	#NULL!	1	1	1	7	2779.79	10862.1	9583.05	#NULL!	#NULL!	3893.62	8066.92	#NULL!	#NULL!	22566.8	#NULL!	#NULL!	#NULL!	#NULL!	#NULL!	#NULL!	#NULL!	#NULL!	501	501	1	2	8	8	8	8	8	8	1	8	2	8	1	2	2	2
A969927505	A9699275	2011	1	1	2	A969	2	75	#NULL!	1	1	1	7	2779.79	4571.88	#NULL!	10009.1	#NULL!	1514.44	2527.53	#NULL!	10444.2	#NULL!	#NULL!	#NULL!	#NULL!	#NULL!	#NULL!	#NULL!	#NULL!	#NULL!	501	501	1	2	8	2	8	8	2	8	1	8	1	1	2	8	8	8
A969927802	A9699278	2011	1	1	2	A969	2	55	#NULL!	4	4	3	7	2779.79	4929.57	#NULL!	4397.53	#NULL!	2322.29	5807.59	#NULL!	4428.03	#NULL!	#NULL!	#NULL!	#NULL!	#NULL!	#NULL!	#NULL!	#NULL!	#NULL!	501	501	1	2	8	2	8	8	2	8	1	8	2	8	2	8	8	8
A969929101	A9699291	2011	1	1	2	A969	1	37	#NULL!	2	2	4	2	2779.79	4071.02	#NULL!	#NULL!	#NULL!	4082.01	5969.62	#NULL!	#NULL!	#NULL!	#NULL!	#NULL!	#NULL!	#NULL!	#NULL!	#NULL!	#NULL!	#NULL!	501	501	1	2	8	8	8	8	2	8	1	8	1	1	2	8	8	8
A969929102	A9699291	2011	1	1	2	A969	2	35	#NULL!	2	2	4	2	2779.79	2341.64	#NULL!	#NULL!	#NULL!	2457.21	2876.13	#NULL!	#NULL!	#NULL!	#NULL!	#NULL!	#NULL!	#NULL!	#NULL!	#NULL!	#NULL!	#NULL!	501	501	1	1	1	8	8	8	2	8	1	8	1	1	1	2	2	1
A969929103	A9699291	2011	1	1	2	A969	2	7	#NULL!	2	2	1	#NULL!	2779.79	1826.44	#NULL!	#NULL!	#NULL!	1987.71	2501.6	#NULL!	#NULL!	#NULL!	#NULL!	#NULL!	#NULL!	#NULL!	#NULL!	#NULL!	#NULL!	#NULL!	501	501	1	1	2	8	8	8	8	8	8	8	8	8	1	1	2	2
A969929104	A9699291	2011	1	1	2	A969	1	5	67	2	2	1	#NULL!	2779.79	1924.55	#NULL!	#NULL!	#NULL!	1760.48	2577.44	#NULL!	#NULL!	#NULL!	#NULL!	#NULL!	#NULL!	#NULL!	#NULL!	#NULL!	#NULL!	#NULL!	501	501	1	2	8	8	8	8	8	8	8	8	8	8	8	8	8	8
A969929701	A9699297	2011	1	1	2	A969	1	45	#NULL!	2	3	3	5	2779.79	3971.14	13039.3	5959.42	#NULL!	4439.16	6557.07	8072.65	7220.31	15730.7	10224.8	#NULL!	#NULL!	#NULL!	#NULL!	#NULL!	#NULL!	#NULL!	501	501	1	2	8	2	8	8	2	8	1	8	1	1	1	1	1	1
A969929702	A9699297	2011	1	1	2	A969	2	38	#NULL!	2	3	3	7	2779.79	2341.64	#NULL!	#NULL!	#NULL!	2457.21	2876.13	#NULL!	#NULL!	#NULL!	#NULL!	#NULL!	#NULL!	#NULL!	#NULL!	#NULL!	#NULL!	#NULL!	501	501	1	2	8	8	8	8	2	8	1	8	2	8	2	8	8	8
A969929703	A9699297	2011	1	1	2	A969	2	14	#NULL!	2	3	1	#NULL!	2779.79	2722.07	9104.59	#NULL!	#NULL!	2892.08	3254.1	#NULL!	#NULL!	7105.93	#NULL!	#NULL!	#NULL!	#NULL!	#NULL!	#NULL!	#NULL!	#NULL!	501	501	1	2	8	8	8	8	8	8	1	8	2	8	2	8	8	8
A969929704	A9699297	2011	1	1	2	A969	2	10	#NULL!	2	3	1	#NULL!	2779.79	2722.07	#NULL!	#NULL!	#NULL!	2892.08	3254.1	#NULL!	#NULL!	#NULL!	#NULL!	#NULL!	#NULL!	#NULL!	#NULL!	#NULL!	#NULL!	#NULL!	501	501	1	1	2	8	8	8	8	8	8	8	8	8	2	8	8	8
A969930101	A9699301	2011	1	1	2	A969	1	38	#NULL!	3	3	4	1	2779.79	4071.02	#NULL!	#NULL!	#NULL!	4082.01	5969.62	#NULL!	#NULL!	#NULL!	#NULL!	#NULL!	#NULL!	#NULL!	#NULL!	#NULL!	#NULL!	#NULL!	501	501	1	1	2	8	8	8	2	8	1	8	2	8	1	1	1	1
A969930102	A9699301	2011	1	1	2	A969	2	34	#NULL!	3	3	4	2	2779.79	2783.89	#NULL!	#NULL!	#NULL!	2960.86	3787.9	#NULL!	#NULL!	#NULL!	#NULL!	#NULL!	#NULL!	#NULL!	#NULL!	#NULL!	#NULL!	#NULL!	501	501	1	2	8	8	8	8	2	8	1	8	2	8	2	8	8	8
A969930103	A9699301	2011	1	1	2	A969	1	8	#NULL!	3	3	1	#NULL!	2779.79	1924.55	#NULL!	#NULL!	#NULL!	1760.48	2577.44	#NULL!	#NULL!	#NULL!	#NULL!	#NULL!	#NULL!	#NULL!	#NULL!	#NULL!	#NULL!	#NULL!	501	501	1	1	2	8	8	8	8	8	8	8	8	8	2	8	8	8
A969930702	A9699307	2011	1	1	2	A969	2	53	#NULL!	4	4	3	6	2779.79	2857.18	9929.62	5428.2	#NULL!	4142.37	9099.58	13690.3	5640.05	19660.1	14345.7	#NULL!	#NULL!	#NULL!	#NULL!	#NULL!	#NULL!	#NULL!	501	501	1	2	8	2	8	8	2	8	1	8	2	8	2	8	8	8
A969930703	A9699307	2011	1	1	2	A969	1	27	#NULL!	4	4	4	2	2779.79	6866.15	#NULL!	#NULL!	#NULL!	#NULL!	#NULL!	#NULL!	#NULL!	#NULL!	#NULL!	#NULL!	#NULL!	#NULL!	#NULL!	#NULL!	#NULL!	#NULL!	501	501	1	1	2	8	8	8	2	8	1	8	2	8	2	8	8	8
A969930704	A9699307	2011	1	1	2	A969	2	26	#NULL!	4	4	4	1	2779.79	6080.56	7411.71	#NULL!	#NULL!	#NULL!	#NULL!	#NULL!	#NULL!	#NULL!	#NULL!	#NULL!	#NULL!	#NULL!	#NULL!	#NULL!	#NULL!	#NULL!	501	501	1	2	8	8	8	8	2	8	1	8	2	8	2	8	8	8
A969931901	A9699319	2011	1	1	2	A969	1	35	#NULL!	4	4	4	1	2779.79	4071.02	#NULL!	#NULL!	#NULL!	#NULL!	#NULL!	#NULL!	#NULL!	#NULL!	#NULL!	#NULL!	#NULL!	#NULL!	#NULL!	#NULL!	#NULL!	#NULL!	501	501	1	2	8	8	8	8	2	8	1	8	2	8	1	1	2	2
A969931902	A9699319	2011	1	1	2	A969	2	36	#NULL!	4	4	4	1	2779.79	2341.64	11286.3	#NULL!	#NULL!	4914.41	5752.25	#NULL!	#NULL!	11144.6	#NULL!	#NULL!	#NULL!	#NULL!	#NULL!	#NULL!	#NULL!	#NULL!	501	501	1	2	8	8	8	8	2	8	1	8	2	8	2	8	8	8
A969933101	A9699331	2011	1	1	2	A969	1	60	#NULL!	3	3	3	5	2779.79	1737.49	6063.4	2256.2	#NULL!	1986.82	1849.37	8833.12	2528.79	6209.74	9792.19	#NULL!	#NULL!	#NULL!	#NULL!	#NULL!	#NULL!	#NULL!	501	501	1	2	8	2	8	8	2	8	1	8	2	8	2	8	8	8
A969933102	A9699331	2011	1	1	2	A969	2	55	#NULL!	3	3	3	7	2779.79	1643.19	#NULL!	2198.77	#NULL!	1548.19	1935.86	#NULL!	2214.01	#NULL!	#NULL!	#NULL!	#NULL!	#NULL!	#NULL!	#NULL!	#NULL!	#NULL!	501	501	1	1	2	2	8	8	2	8	1	8	2	8	2	8	8	8
A969933103	A9699331	2011	1	1	2	A969	2	28	#NULL!	2	3	3	1	2779.79	4560.42	#NULL!	#NULL!	#NULL!	4311.91	4511.42	#NULL!	#NULL!	#NULL!	#NULL!	#NULL!	#NULL!	#NULL!	#NULL!	#NULL!	#NULL!	#NULL!	501	501	1	2	8	8	8	8	2	8	1	8	2	8	2	8	8	8
A969933104	A9699331	2011	1	1	2	A969	1	23	#NULL!	2	3	3	3	2779.79	4331.06	9794.31	#NULL!	#NULL!	5726.56	8753.52	#NULL!	#NULL!	11512.1	#NULL!	#NULL!	#NULL!	#NULL!	#NULL!	#NULL!	#NULL!	#NULL!	501	501	1	2	8	8	8	8	2	8	1	8	2	8	2	8	8	8
A969933701	A9699337	2011	1	1	2	A969	1	61	#NULL!	3	3	2	6	2779.79	1737.49	#NULL!	2256.2	#NULL!	1986.82	1849.37	#NULL!	2528.79	#NULL!	#NULL!	#NULL!	#NULL!	#NULL!	#NULL!	#NULL!	#NULL!	#NULL!	501	501	1	2	8	2	8	8	2	8	1	8	2	8	2	8	8	8
A969933702	A9699337	2011	1	1	2	A969	2	56	#NULL!	3	3	1	7	2779.79	1643.19	#NULL!	2198.77	#NULL!	1548.19	1935.86	#NULL!	2214.01	#NULL!	#NULL!	#NULL!	#NULL!	#NULL!	#NULL!	#NULL!	#NULL!	#NULL!	501	501	1	2	8	2	8	8	2	8	1	8	2	8	2	8	8	8
A969933703	A9699337	2011	1	1	2	A969	1	28	#NULL!	3	3	4	3	2779.79	5149.62	14298.7	#NULL!	#NULL!	6915.62	8931.93	#NULL!	#NULL!	16741.3	#NULL!	#NULL!	#NULL!	#NULL!	#NULL!	#NULL!	#NULL!	#NULL!	501	501	1	1	2	8	8	8	2	8	1	8	2	8	1	1	1	2
A969934202	A9699342	2011	1	1	2	A969	2	44	#NULL!	2	3	3	7	2779.79	5807.91	11186	8099.26	#NULL!	6128.95	12747.6	15796.5	7795.37	19914	16081	#NULL!	#NULL!	#NULL!	#NULL!	#NULL!	#NULL!	#NULL!	501	501	1	2	8	2	8	8	2	8	1	8	2	8	2	8	8	8
A969935502	A9699355	2011	1	1	2	A969	2	44	#NULL!	2	3	3	6	2779.79	5807.91	#NULL!	8099.26	#NULL!	4085.97	4249.19	#NULL!	7795.37	#NULL!	#NULL!	#NULL!	#NULL!	#NULL!	#NULL!	#NULL!	#NULL!	#NULL!	501	501	1	2	8	2	8	8	2	8	1	8	2	8	2	8	8	8
A969935503	A9699355	2011	1	1	2	A969	1	17	#NULL!	2	3	2	7	2779.79	6793.99	11689.5	#NULL!	#NULL!	5064.75	7304.53	#NULL!	#NULL!	22003.2	#NULL!	#NULL!	#NULL!	#NULL!	#NULL!	#NULL!	#NULL!	#NULL!	501	501	1	2	8	8	8	8	8	8	1	8	2	8	2	8	8	8
A969935504	A9699355	2011	1	1	2	A969	2	14	#NULL!	2	3	1	#NULL!	2779.79	5444.15	#NULL!	#NULL!	#NULL!	3856.11	4338.81	#NULL!	#NULL!	#NULL!	#NULL!	#NULL!	#NULL!	#NULL!	#NULL!	#NULL!	#NULL!	#NULL!	501	501	1	2	8	8	8	8	8	8	1	8	2	8	2	8	8	8
A969936201	A9699362	2011	1	1	2	A969	2	72	#NULL!	3	2	2	7	2779.79	1444.46	#NULL!	3336.35	#NULL!	1387.86	1516.52	#NULL!	3481.39	#NULL!	#NULL!	#NULL!	#NULL!	#NULL!	#NULL!	#NULL!	#NULL!	#NULL!	501	501	1	2	8	2	8	8	2	8	1	8	2	8	2	8	8	8
A969936501	A9699365	2011	1	1	2	A969	1	59	#NULL!	2	3	4	7	2779.79	2511.22	3623.79	3182.19	#NULL!	2954.76	2929.97	4853.45	3679	4002.15	5360.33	#NULL!	#NULL!	#NULL!	#NULL!	#NULL!	#NULL!	#NULL!	501	501	1	1	2	1	2	2	2	8	1	8	2	8	2	8	8	8
A969936502	A9699365	2011	1	1	2	A969	2	61	#NULL!	4	3	1	3	2779.79	1708.86	3078.4	1844.33	#NULL!	1805.44	1653.72	4367.5	1927.63	3135.89	4551.52	#NULL!	#NULL!	#NULL!	#NULL!	#NULL!	#NULL!	#NULL!	501	501	1	2	8	2	8	8	2	8	1	8	2	8	2	8	8	8
A969937201	A9699372	2011	1	1	2	A969	2	73	#NULL!	3	2	3	6	2779.79	1444.46	#NULL!	#NULL!	#NULL!	1387.86	1516.52	#NULL!	#NULL!	#NULL!	#NULL!	#NULL!	#NULL!	#NULL!	#NULL!	#NULL!	#NULL!	#NULL!	501	501	1	2	8	2	8	8	2	8	1	8	1	2	1	1	1	1
A969937202	A9699372	2011	1	1	2	A969	1	76	#NULL!	3	2	3	6	2779.79	1469.43	#NULL!	#NULL!	#NULL!	1443.71	1565.48	#NULL!	#NULL!	#NULL!	#NULL!	#NULL!	#NULL!	#NULL!	#NULL!	#NULL!	#NULL!	#NULL!	501	501	1	2	8	2	8	8	2	8	1	8	2	8	1	2	2	2
A969937203	A9699372	2011	1	1	2	A969	1	40	#NULL!	1	2	3	6	2779.79	4570.82	#NULL!	#NULL!	#NULL!	5039.99	6349.65	#NULL!	#NULL!	#NULL!	#NULL!	#NULL!	#NULL!	#NULL!	#NULL!	#NULL!	#NULL!	#NULL!	501	501	1	1	2	1	1	2	2	8	1	8	2	8	1	2	2	1
A969938101	A9699381	2011	1	1	2	A969	1	64	#NULL!	3	3	3	5	2779.79	1737.49	#NULL!	2256.2	#NULL!	1986.82	1849.37	#NULL!	2528.79	#NULL!	#NULL!	#NULL!	#NULL!	#NULL!	#NULL!	#NULL!	#NULL!	#NULL!	501	501	1	2	8	2	8	8	2	8	1	8	2	8	1	1	1	1
A969938102	A9699381	2011	1	1	2	A969	2	57	#NULL!	3	3	2	5	2779.79	1643.19	#NULL!	2198.77	#NULL!	1548.19	1935.86	#NULL!	2214.01	#NULL!	#NULL!	#NULL!	#NULL!	#NULL!	#NULL!	#NULL!	#NULL!	#NULL!	501	501	1	2	8	2	8	8	2	8	1	8	2	8	2	8	8	8
A969938103	A9699381	2011	1	1	2	A969	2	26	#NULL!	3	3	4	2	2779.79	4560.42	11117.6	#NULL!	#NULL!	4311.91	4511.42	#NULL!	#NULL!	12830.8	#NULL!	#NULL!	#NULL!	#NULL!	#NULL!	#NULL!	#NULL!	#NULL!	501	501	1	1	2	8	8	8	2	8	1	8	2	8	1	2	1	1
A970933701	A9709337	2011	1	1	1	A970	2	68	#NULL!	4	4	3	7	6352.18	4610.14	9370.81	10484.7	#NULL!	6678.15	4345.22	31843.6	11872.5	10055.9	33732.9	#NULL!	#NULL!	#NULL!	#NULL!	#NULL!	#NULL!	#NULL!	512	517	1	2	8	2	8	8	2	8	1	8	2	8	2	8	8	8
A970933702	A9709337	2011	1	1	1	A970	2	43	#NULL!	4	4	4	2	6352.18	8294.9	15975.9	#NULL!	#NULL!	8753.41	9103.08	#NULL!	#NULL!	14220.7	#NULL!	#NULL!	#NULL!	#NULL!	#NULL!	#NULL!	#NULL!	#NULL!	512	517	1	1	2	2	8	8	2	8	1	8	2	8	1	1	1	1
A970933901	A9709339	2011	1	1	1	A970	1	50	#NULL!	4	4	4	1	6352.18	9902.67	#NULL!	#NULL!	#NULL!	#NULL!	#NULL!	#NULL!	#NULL!	#NULL!	#NULL!	#NULL!	#NULL!	#NULL!	#NULL!	#NULL!	#NULL!	#NULL!	512	517	1	2	8	2	8	8	2	8	1	8	2	8	2	8	8	8
A970933902	A9709339	2011	1	1	1	A970	2	48	#NULL!	4	4	4	3	6352.18	7652.91	#NULL!	20721	#NULL!	14381.9	17719.4	#NULL!	21803.8	#NULL!	#NULL!	#NULL!	#NULL!	#NULL!	#NULL!	#NULL!	#NULL!	#NULL!	512	517	1	2	8	2	8	8	2	8	2	3	2	8	2	8	8	8
A970933903	A9709339	2011	1	1	1	A970	2	22	#NULL!	4	4	3	7	6352.18	11491.7	35340.4	#NULL!	#NULL!	#NULL!	#NULL!	#NULL!	#NULL!	#NULL!	#NULL!	#NULL!	#NULL!	#NULL!	#NULL!	#NULL!	#NULL!	#NULL!	512	517	1	2	8	8	8	8	2	8	1	8	2	8	1	2	1	2
A970933905	A9709339	2011	1	1	1	A970	1	12	#NULL!	4	4	1	#NULL!	6352.18	5475.38	#NULL!	#NULL!	#NULL!	11238.8	17270.5	#NULL!	#NULL!	#NULL!	#NULL!	#NULL!	#NULL!	#NULL!	#NULL!	#NULL!	#NULL!	#NULL!	512	517	1	1	2	8	8	8	8	8	1	8	2	8	1	2	1	2
A970934402	A9709344	2011	1	1	1	A970	2	74	#NULL!	4	4	3	7	6352.18	4125.99	#NULL!	9530.01	#NULL!	3964.29	4331.8	#NULL!	9944.3	#NULL!	#NULL!	#NULL!	#NULL!	#NULL!	#NULL!	#NULL!	#NULL!	#NULL!	512	517	1	2	8	1	2	2	2	8	1	8	2	8	2	8	8	8
A970934701	A9709347	2011	1	1	1	A970	1	62	#NULL!	3	3	3	5	6352.18	4962.99	17319.6	6444.64	#NULL!	5675.17	5282.56	25231	7223.26	17737.6	27970.5	#NULL!	#NULL!	#NULL!	#NULL!	#NULL!	#NULL!	#NULL!	512	517	1	2	8	2	8	8	2	8	1	8	2	8	1	2	1	1
A970934702	A9709347	2011	1	1	1	A970	2	61	#NULL!	4	3	3	7	6352.18	4881.22	#NULL!	5268.16	#NULL!	5157.09	4723.71	#NULL!	5506.11	#NULL!	#NULL!	#NULL!	#NULL!	#NULL!	#NULL!	#NULL!	#NULL!	#NULL!	512	517	1	2	8	1	2	2	2	8	1	8	2	8	2	8	8	8
A970934901	A9709349	2011	1	1	1	A970	1	76	#NULL!	3	1	1	7	6352.18	4197.3	#NULL!	7875.03	#NULL!	4123.85	4471.66	#NULL!	8217.18	#NULL!	#NULL!	#NULL!	#NULL!	#NULL!	#NULL!	#NULL!	#NULL!	#NULL!	512	517	1	2	8	2	8	8	2	8	1	8	2	8	2	8	8	8
A970934902	A9709349	2011	1	1	1	A970	2	73	#NULL!	3	1	1	4	6352.18	4125.99	#NULL!	9530.01	#NULL!	3964.29	4331.8	#NULL!	9944.3	#NULL!	#NULL!	#NULL!	#NULL!	#NULL!	#NULL!	#NULL!	#NULL!	#NULL!	512	517	1	2	8	2	8	8	2	8	1	8	2	8	2	8	8	8
A970935201	A9709352	2011	1	1	1	A970	1	50	#NULL!	2	3	4	1	6352.18	9902.67	29694.3	#NULL!	#NULL!	15316.3	16877.6	#NULL!	#NULL!	63411	#NULL!	#NULL!	#NULL!	#NULL!	#NULL!	#NULL!	#NULL!	#NULL!	512	517	1	2	8	2	8	8	2	8	1	8	2	8	2	8	8	8
A970935202	A9709352	2011	1	1	1	A970	2	49	#NULL!	2	3	3	7	6352.18	7652.91	#NULL!	20721	#NULL!	9587.92	11813	#NULL!	21803.8	#NULL!	#NULL!	#NULL!	#NULL!	#NULL!	#NULL!	#NULL!	#NULL!	#NULL!	512	517	1	1	1	2	8	8	2	8	1	8	2	8	1	2	1	2
A970935203	A9709352	2011	1	1	1	A970	1	24	#NULL!	2	3	4	1	6352.18	12371.3	#NULL!	#NULL!	#NULL!	19024.9	23766.3	#NULL!	#NULL!	#NULL!	#NULL!	#NULL!	#NULL!	#NULL!	#NULL!	#NULL!	#NULL!	#NULL!	512	517	1	2	8	8	8	8	2	8	1	8	2	8	1	2	1	2
A970935204	A9709352	2011	1	1	1	A970	1	22	#NULL!	2	3	2	3	6352.18	12371.3	27976.6	#NULL!	#NULL!	#NULL!	#NULL!	#NULL!	#NULL!	#NULL!	#NULL!	#NULL!	#NULL!	#NULL!	#NULL!	#NULL!	#NULL!	#NULL!	512	517	1	1	2	8	8	8	2	8	1	8	2	8	2	8	8	8
A970935701	A9709357	2011	1	1	1	A970	1	61	#NULL!	4	4	4	7	6352.18	6617.31	#NULL!	9666.96	#NULL!	11350.3	10565.1	#NULL!	10834.9	#NULL!	#NULL!	#NULL!	#NULL!	#NULL!	#NULL!	#NULL!	#NULL!	#NULL!	512	517	1	2	8	2	8	8	2	8	1	8	2	8	1	2	1	1
A970935702	A9709357	2011	1	1	1	A970	2	58	#NULL!	4	4	4	7	6352.18	6258.17	#NULL!	9420.88	#NULL!	8844.54	11059.3	#NULL!	9486.21	#NULL!	#NULL!	#NULL!	#NULL!	#NULL!	#NULL!	#NULL!	#NULL!	#NULL!	512	517	1	2	8	2	8	8	1	2	1	8	2	8	2	8	8	8
A970935703	A9709357	2011	1	1	1	A970	1	29	#NULL!	4	4	4	1	6352.18	18436.3	54457.4	#NULL!	#NULL!	#NULL!	#NULL!	#NULL!	#NULL!	#NULL!	#NULL!	#NULL!	#NULL!	#NULL!	#NULL!	#NULL!	#NULL!	#NULL!	512	517	1	2	8	8	8	8	2	8	1	8	2	8	1	2	1	1
A970935902	A9709359	2011	1	1	1	A970	2	49	#NULL!	4	4	4	7	6352.18	11479.4	21522.6	20721	#NULL!	19125.4	19679.1	39918.6	21803.8	41938.7	41800.1	#NULL!	#NULL!	#NULL!	#NULL!	#NULL!	#NULL!	#NULL!	512	517	1	2	8	2	8	8	2	8	1	8	2	8	1	1	1	1
A970935903	A9709359	2011	1	1	1	A970	2	21	#NULL!	4	4	3	7	6352.18	17237.5	17670.2	#NULL!	#NULL!	#NULL!	#NULL!	#NULL!	#NULL!	#NULL!	#NULL!	#NULL!	#NULL!	#NULL!	#NULL!	#NULL!	#NULL!	#NULL!	512	517	1	1	2	8	8	8	2	8	1	8	2	8	1	1	1	1
A970936601	A9709366	2011	1	1	1	A970	2	54	#NULL!	1	2	1	6	6352.18	12241.9	28363.1	#NULL!	#NULL!	11832.3	12996.1	#NULL!	#NULL!	28078.7	#NULL!	#NULL!	#NULL!	#NULL!	#NULL!	#NULL!	#NULL!	#NULL!	512	517	1	2	8	1	2	2	2	8	1	8	2	8	1	2	1	2
A970936701	A9709367	2011	1	1	1	A970	1	63	#NULL!	2	2	2	5	6352.18	7444.48	#NULL!	12889.3	#NULL!	#NULL!	#NULL!	#NULL!	#NULL!	#NULL!	#NULL!	#NULL!	#NULL!	#NULL!	#NULL!	#NULL!	#NULL!	#NULL!	512	517	1	2	8	2	8	8	2	8	1	8	2	8	2	8	8	8
A970936703	A9709367	2011	1	1	1	A970	2	24	#NULL!	1	2	4	2	6352.18	17237.5	#NULL!	#NULL!	#NULL!	#NULL!	#NULL!	#NULL!	#NULL!	#NULL!	#NULL!	#NULL!	#NULL!	#NULL!	#NULL!	#NULL!	#NULL!	#NULL!	512	517	1	2	8	8	8	8	2	8	1	8	2	8	2	8	8	8
A970937001	A9709370	2011	1	1	1	A970	1	51	#NULL!	4	4	4	1	6352.18	9902.67	#NULL!	#NULL!	#NULL!	11487.2	12658.2	#NULL!	#NULL!	#NULL!	#NULL!	#NULL!	#NULL!	#NULL!	#NULL!	#NULL!	#NULL!	#NULL!	512	517	1	2	8	2	8	8	2	8	1	8	2	8	2	8	8	8
A970937002	A9709370	2011	1	1	1	A970	1	80	#NULL!	4	4	3	7	6352.18	4197.3	#NULL!	11812.5	#NULL!	4123.85	4471.66	#NULL!	12325.8	#NULL!	#NULL!	#NULL!	#NULL!	#NULL!	#NULL!	#NULL!	#NULL!	#NULL!	512	517	1	2	8	2	8	8	2	8	3	2	2	8	2	8	8	8
A970937003	A9709370	2011	1	1	1	A970	2	74	#NULL!	4	4	1	7	6352.18	4125.99	#NULL!	14295	#NULL!	3964.29	4331.8	#NULL!	14916.4	#NULL!	#NULL!	#NULL!	#NULL!	#NULL!	#NULL!	#NULL!	#NULL!	#NULL!	512	517	1	2	8	2	8	8	2	8	1	8	2	8	2	8	8	8
A970937004	A9709370	2011	1	1	1	A970	2	15	#NULL!	4	4	2	7	6352.18	10342.2	#NULL!	#NULL!	#NULL!	11121.8	13825.5	#NULL!	#NULL!	#NULL!	#NULL!	#NULL!	#NULL!	#NULL!	#NULL!	#NULL!	#NULL!	#NULL!	512	517	1	2	8	8	8	8	8	8	1	8	2	8	1	1	1	1
A970937005	A9709370	2011	1	1	1	A970	2	11	#NULL!	4	4	1	#NULL!	6352.18	7775.37	#NULL!	#NULL!	#NULL!	8260.97	9295.07	#NULL!	#NULL!	#NULL!	#NULL!	#NULL!	#NULL!	#NULL!	#NULL!	#NULL!	#NULL!	#NULL!	512	517	1	2	8	8	8	8	8	8	8	8	8	8	2	8	8	8
A970937101	A9709371	2011	1	1	1	A970	2	50	#NULL!	3	3	3	6	6352.18	6120.97	#NULL!	7752.6	#NULL!	5916.17	6498.04	#NULL!	8055.16	#NULL!	#NULL!	#NULL!	#NULL!	#NULL!	#NULL!	#NULL!	#NULL!	#NULL!	512	517	1	2	8	2	8	8	2	8	1	8	2	8	2	8	8	8
A970937102	A9709371	2011	1	1	1	A970	1	26	#NULL!	3	3	3	5	6352.18	14709.4	#NULL!	#NULL!	#NULL!	19549.1	22424	#NULL!	#NULL!	#NULL!	#NULL!	#NULL!	#NULL!	#NULL!	#NULL!	#NULL!	#NULL!	#NULL!	512	517	1	2	8	8	8	8	2	8	1	8	2	8	1	2	1	1
A970937103	A9709371	2011	1	1	1	A970	1	23	#NULL!	3	3	3	7	6352.18	12371.3	#NULL!	#NULL!	#NULL!	16357.4	23766.3	#NULL!	#NULL!	#NULL!	#NULL!	#NULL!	#NULL!	#NULL!	#NULL!	#NULL!	#NULL!	#NULL!	512	517	1	2	8	8	8	8	2	8	2	3	2	8	2	8	8	8
A970937201	A9709372	2011	1	1	1	A970	2	50	#NULL!	1	2	3	6	6352.18	6120.97	#NULL!	7752.6	#NULL!	#NULL!	#NULL!	#NULL!	#NULL!	#NULL!	#NULL!	#NULL!	#NULL!	#NULL!	#NULL!	#NULL!	#NULL!	#NULL!	512	517	1	1	2	2	8	8	2	8	1	8	2	8	1	1	1	1
A970937202	A9709372	2011	1	1	1	A970	1	55	#NULL!	1	2	4	5	6352.18	7173.09	#NULL!	9089.66	#NULL!	#NULL!	#NULL!	#NULL!	#NULL!	#NULL!	#NULL!	#NULL!	#NULL!	#NULL!	#NULL!	#NULL!	#NULL!	#NULL!	512	517	1	2	8	2	8	8	2	8	1	8	2	8	2	8	8	8
A970937203	A9709372	2011	1	1	1	A970	1	24	#NULL!	1	2	3	3	6352.18	12371.3	#NULL!	#NULL!	#NULL!	#NULL!	#NULL!	#NULL!	#NULL!	#NULL!	#NULL!	#NULL!	#NULL!	#NULL!	#NULL!	#NULL!	#NULL!	#NULL!	512	517	1	2	8	8	8	8	2	8	1	8	2	8	2	8	8	8
A970937204	A9709372	2011	1	1	1	A970	1	20	#NULL!	1	2	3	7	6352.18	12371.3	#NULL!	#NULL!	#NULL!	#NULL!	#NULL!	#NULL!	#NULL!	#NULL!	#NULL!	#NULL!	#NULL!	#NULL!	#NULL!	#NULL!	#NULL!	#NULL!	512	517	1	2	8	8	8	8	2	8	1	8	2	8	1	2	1	1
A970937301	A9709373	2011	1	1	1	A970	1	77	#NULL!	4	3	4	4	6352.18	4197.3	#NULL!	10500	#NULL!	4123.85	4471.66	#NULL!	10956.2	#NULL!	#NULL!	#NULL!	#NULL!	#NULL!	#NULL!	#NULL!	#NULL!	#NULL!	512	517	1	2	8	1	2	1	2	8	3	3	2	8	2	8	8	8
A970937302	A9709373	2011	1	1	1	A970	2	74	#NULL!	4	3	1	6	6352.18	4125.99	#NULL!	#NULL!	#NULL!	3964.29	4331.8	#NULL!	#NULL!	#NULL!	#NULL!	#NULL!	#NULL!	#NULL!	#NULL!	#NULL!	#NULL!	#NULL!	512	517	1	2	8	2	8	8	2	8	1	8	2	8	2	8	8	8
A970937303	A9709373	2011	1	1	1	A970	2	42	#NULL!	3	3	4	7	6352.18	8294.9	#NULL!	15423.2	#NULL!	8753.41	9103.08	#NULL!	14844.5	#NULL!	#NULL!	#NULL!	#NULL!	#NULL!	#NULL!	#NULL!	#NULL!	#NULL!	512	517	1	1	2	2	8	8	2	8	1	8	2	8	2	8	8	8
A970937304	A9709373	2011	1	1	1	A970	2	48	#NULL!	3	3	4	1	6352.18	7652.91	#NULL!	13814	#NULL!	7190.94	8859.72	#NULL!	14535.9	#NULL!	#NULL!	#NULL!	#NULL!	#NULL!	#NULL!	#NULL!	#NULL!	#NULL!	512	517	1	2	8	2	8	8	2	8	1	8	2	8	2	8	8	8
A970937401	A9709374	2011	1	1	1	A970	1	44	#NULL!	4	4	2	5	6352.18	13056.2	15782.6	#NULL!	#NULL!	14396.3	18137.2	#NULL!	#NULL!	17554.1	#NULL!	#NULL!	#NULL!	#NULL!	#NULL!	#NULL!	#NULL!	#NULL!	512	517	1	2	8	2	8	8	2	8	1	8	2	8	2	8	8	8
A970937501	A9709375	2011	1	1	1	A970	2	59	#NULL!	3	3	3	6	6352.18	9387.25	#NULL!	6280.59	#NULL!	8844.54	11059.3	#NULL!	6324.14	#NULL!	#NULL!	#NULL!	#NULL!	#NULL!	#NULL!	#NULL!	#NULL!	#NULL!	512	517	1	2	8	2	8	8	2	8	1	8	2	8	2	8	8	8
A970937801	A9709378	2011	1	1	1	A970	1	69	#NULL!	4	4	4	1	6352.18	3796.63	#NULL!	7304.15	#NULL!	4602.11	4902.54	#NULL!	7961.15	#NULL!	#NULL!	#NULL!	#NULL!	#NULL!	#NULL!	#NULL!	#NULL!	#NULL!	512	517	1	1	2	1	2	2	2	8	1	8	2	8	1	1	1	1
A970937802	A9709378	2011	1	1	1	A970	2	62	#NULL!	4	4	4	2	6352.18	4881.22	#NULL!	5268.16	#NULL!	5157.09	4723.71	#NULL!	5506.11	#NULL!	#NULL!	#NULL!	#NULL!	#NULL!	#NULL!	#NULL!	#NULL!	#NULL!	512	517	1	2	8	2	8	8	2	8	1	8	2	8	2	8	8	8
A970938001	A9709380	2011	1	1	1	A970	1	60	#NULL!	3	3	1	5	6352.18	9925.97	#NULL!	12889.3	#NULL!	11350.3	10565.1	#NULL!	14446.5	#NULL!	#NULL!	#NULL!	#NULL!	#NULL!	#NULL!	#NULL!	#NULL!	#NULL!	512	517	1	2	8	2	8	8	2	8	1	8	2	8	2	8	8	8
A970938201	A9709382	2011	1	1	1	A970	1	61	#NULL!	2	2	3	4	6352.18	4962.99	8659.79	6444.64	#NULL!	5675.17	5282.56	12615.5	7223.26	8868.79	13985.3	#NULL!	#NULL!	#NULL!	#NULL!	#NULL!	#NULL!	#NULL!	512	517	1	2	8	2	8	8	2	8	2	3	2	8	2	8	8	8
A970938202	A9709382	2011	1	1	1	A970	2	58	#NULL!	1	2	2	3	6352.18	4693.63	10896.8	6280.59	#NULL!	4422.27	5529.63	15425.9	6324.14	10769.6	15448.7	#NULL!	#NULL!	#NULL!	#NULL!	#NULL!	#NULL!	#NULL!	512	517	1	2	8	2	8	8	2	8	1	8	2	8	2	8	8	8
A971932801	A9719328	2011	1	1	1	A971	1	68	#NULL!	3	2	3	5	6809.98	3663.23	#NULL!	7047.5	#NULL!	4440.41	4730.28	#NULL!	7681.42	#NULL!	#NULL!	#NULL!	#NULL!	#NULL!	#NULL!	#NULL!	#NULL!	#NULL!	512	517	1	2	8	2	8	8	2	8	1	8	2	8	2	8	8	8
A971932802	A9719328	2011	1	1	1	A971	2	63	#NULL!	2	2	1	7	6809.98	4709.7	#NULL!	5083.05	#NULL!	4975.89	4557.73	#NULL!	5312.64	#NULL!	#NULL!	#NULL!	#NULL!	#NULL!	#NULL!	#NULL!	#NULL!	#NULL!	512	517	1	2	8	1	2	2	2	8	1	8	2	8	2	8	8	8
A971933002	A9719330	2011	1	1	1	A971	1	54	#NULL!	4	4	4	1	6809.98	15924.5	#NULL!	#NULL!	#NULL!	#NULL!	#NULL!	#NULL!	#NULL!	#NULL!	#NULL!	#NULL!	#NULL!	#NULL!	#NULL!	#NULL!	#NULL!	#NULL!	512	517	1	2	8	2	8	8	2	8	1	8	2	8	2	8	8	8
A971933003	A9719330	2011	1	1	1	A971	2	23	#NULL!	4	4	3	7	6809.98	18011.8	56479.2	#NULL!	#NULL!	#NULL!	#NULL!	#NULL!	#NULL!	#NULL!	#NULL!	#NULL!	#NULL!	#NULL!	#NULL!	#NULL!	#NULL!	#NULL!	512	517	1	2	8	8	8	8	2	8	1	8	2	8	2	8	8	8
A971933005	A9719330	2011	1	1	1	A971	2	89	#NULL!	4	4	1	7	6809.98	7000.18	#NULL!	#NULL!	#NULL!	10434.7	19104.2	#NULL!	#NULL!	#NULL!	#NULL!	#NULL!	#NULL!	#NULL!	#NULL!	#NULL!	#NULL!	#NULL!	512	517	1	2	8	2	8	8	2	8	2	3	2	8	2	8	8	8
A971933102	A9719331	2011	1	1	1	A971	2	64	#NULL!	2	2	1	6	6809.98	9419.41	#NULL!	#NULL!	#NULL!	4975.89	9115.46	#NULL!	#NULL!	#NULL!	#NULL!	#NULL!	#NULL!	#NULL!	#NULL!	#NULL!	#NULL!	#NULL!	512	517	1	2	8	2	8	8	2	8	1	8	2	8	2	8	8	8
A971933501	A9719335	2011	1	1	1	A971	1	32	#NULL!	4	4	4	3	6809.98	9742.08	18212.1	#NULL!	#NULL!	10232	19737.5	#NULL!	#NULL!	23588.8	#NULL!	#NULL!	#NULL!	#NULL!	#NULL!	#NULL!	#NULL!	#NULL!	512	517	1	2	8	8	8	8	2	8	1	8	2	8	2	8	8	8
A971934401	A9719344	2011	1	1	1	A971	1	59	#NULL!	2	2	3	1	6809.98	13842.1	19974.7	#NULL!	#NULL!	16286.9	16150.3	#NULL!	#NULL!	22060.2	#NULL!	#NULL!	#NULL!	#NULL!	#NULL!	#NULL!	#NULL!	#NULL!	512	517	1	2	8	2	8	8	2	8	1	8	2	8	2	8	8	8
A971934501	A9719345	2011	1	1	1	A971	1	66	#NULL!	3	2	4	7	6809.98	3663.23	14266.5	14095	#NULL!	8880.81	9460.56	22533.7	15362.8	14976.7	23507	#NULL!	#NULL!	#NULL!	#NULL!	#NULL!	#NULL!	#NULL!	512	517	1	1	9	1	3	2	1	2	1	8	2	8	2	8	8	8
A971934502	A9719345	2011	1	1	1	A971	2	67	#NULL!	3	2	3	3	6809.98	4448.16	#NULL!	#NULL!	#NULL!	#NULL!	#NULL!	#NULL!	#NULL!	#NULL!	#NULL!	#NULL!	#NULL!	#NULL!	#NULL!	#NULL!	#NULL!	#NULL!	512	517	1	2	8	2	8	8	2	8	1	8	2	8	2	8	8	8
A971934702	A9719347	2011	1	1	1	A971	2	65	#NULL!	4	3	1	7	6809.98	8896.31	#NULL!	10116.3	#NULL!	#NULL!	#NULL!	#NULL!	#NULL!	#NULL!	#NULL!	#NULL!	#NULL!	#NULL!	#NULL!	#NULL!	#NULL!	#NULL!	512	517	1	2	8	1	1	2	2	8	1	8	2	8	2	8	8	8
A971934703	A9719347	2011	1	1	1	A971	1	3	45	3	3	1	#NULL!	6809.98	8709.73	#NULL!	#NULL!	#NULL!	#NULL!	#NULL!	#NULL!	#NULL!	#NULL!	#NULL!	#NULL!	#NULL!	#NULL!	#NULL!	#NULL!	#NULL!	#NULL!	512	517	1	8	8	8	8	8	8	8	8	8	8	8	8	8	8	8
A971935701	A9719357	2011	1	1	1	A971	1	66	#NULL!	1	1	1	7	6809.98	3663.23	#NULL!	#NULL!	#NULL!	4440.41	4730.28	#NULL!	#NULL!	#NULL!	#NULL!	#NULL!	#NULL!	#NULL!	#NULL!	#NULL!	#NULL!	#NULL!	512	517	1	9	9	2	8	8	2	8	1	8	1	2	2	8	8	8
A971935702	A9719357	2011	1	1	1	A971	2	59	#NULL!	1	1	2	7	6809.98	4528.71	#NULL!	12119.8	#NULL!	4266.89	5335.33	#NULL!	12203.9	#NULL!	#NULL!	#NULL!	#NULL!	#NULL!	#NULL!	#NULL!	#NULL!	#NULL!	512	517	1	2	8	1	1	2	2	8	1	8	2	8	2	8	8	8
A971935801	A9719358	2011	1	1	1	A971	2	58	#NULL!	2	3	1	6	6809.98	13586.1	#NULL!	6059.91	#NULL!	12800.7	16006	#NULL!	6101.93	#NULL!	#NULL!	#NULL!	#NULL!	#NULL!	#NULL!	#NULL!	#NULL!	#NULL!	512	517	1	2	8	2	8	8	2	8	1	8	2	8	2	8	8	8
A971935902	A9719359	2011	1	1	1	A971	2	36	#NULL!	1	1	3	7	6809.98	12907.3	31105.7	#NULL!	#NULL!	13544.4	10569	#NULL!	#NULL!	30715.1	#NULL!	#NULL!	#NULL!	#NULL!	#NULL!	#NULL!	#NULL!	#NULL!	512	517	1	2	8	8	8	8	2	8	1	8	2	8	2	8	8	8
A971935903	A9719359	2011	1	1	1	A971	2	8	#NULL!	1	1	1	#NULL!	6809.98	10067.5	#NULL!	#NULL!	#NULL!	10956.4	9192.72	#NULL!	#NULL!	#NULL!	#NULL!	#NULL!	#NULL!	#NULL!	#NULL!	#NULL!	#NULL!	#NULL!	512	517	1	1	2	8	8	8	8	8	8	8	8	8	2	8	8	8
A971935904	A9719359	2011	1	1	1	A971	2	2	32	1	1	1	#NULL!	6809.98	8096.15	#NULL!	#NULL!	#NULL!	7773.52	8269.66	#NULL!	#NULL!	#NULL!	#NULL!	#NULL!	#NULL!	#NULL!	#NULL!	#NULL!	#NULL!	#NULL!	512	517	1	8	8	8	8	8	8	8	8	8	8	8	8	8	8	8
A971936301	A9719363	2011	1	1	1	A971	2	64	#NULL!	1	1	1	7	6809.98	4709.7	16968.4	5083.05	#NULL!	4975.89	4557.73	24074.1	5312.64	17285.3	25088.4	#NULL!	#NULL!	#NULL!	#NULL!	#NULL!	#NULL!	#NULL!	512	517	1	2	8	2	8	8	2	8	1	8	2	8	2	8	8	8
A971936302	A9719363	2011	1	1	1	A971	1	67	#NULL!	1	1	3	7	6809.98	3663.23	#NULL!	7047.5	#NULL!	4440.41	4730.28	#NULL!	7681.42	#NULL!	#NULL!	#NULL!	#NULL!	#NULL!	#NULL!	#NULL!	#NULL!	#NULL!	512	517	1	2	8	1	3	2	2	8	1	8	2	8	1	2	2	2
A971936501	A9719365	2011	1	1	1	A971	1	40	#NULL!	3	3	4	7	6809.98	12597.4	15228	13977.6	#NULL!	13890.5	17499.9	20816	18282.1	16937.3	25637.3	#NULL!	#NULL!	#NULL!	#NULL!	#NULL!	#NULL!	#NULL!	512	517	1	2	8	2	8	8	2	8	1	8	2	8	2	8	8	8
A971936502	A9719365	2011	1	1	1	A971	1	8	#NULL!	3	3	1	#NULL!	6809.98	5304.16	#NULL!	#NULL!	#NULL!	4851.96	7103.54	#NULL!	#NULL!	#NULL!	#NULL!	#NULL!	#NULL!	#NULL!	#NULL!	#NULL!	#NULL!	#NULL!	512	517	1	1	2	8	8	8	8	8	8	8	8	8	2	8	8	8
A971937001	A9719370	2011	1	1	1	A971	1	63	#NULL!	2	2	1	6	6809.98	7981	#NULL!	6218.2	#NULL!	9126.27	8494.92	#NULL!	6969.45	#NULL!	#NULL!	#NULL!	#NULL!	#NULL!	#NULL!	#NULL!	#NULL!	#NULL!	512	517	1	2	8	2	8	8	2	8	1	8	2	8	2	8	8	8
A971937002	A9719370	2011	1	1	1	A971	2	58	#NULL!	2	2	1	3	6809.98	7547.84	52569.6	6059.91	#NULL!	7111.48	8892.22	29767.8	6101.93	51955.8	29811.7	#NULL!	#NULL!	#NULL!	#NULL!	#NULL!	#NULL!	#NULL!	512	517	1	2	8	2	8	8	2	8	1	8	2	8	2	8	8	8
A971937003	A9719370	2011	1	1	1	A971	2	33	#NULL!	1	2	4	1	6809.98	12787.6	#NULL!	#NULL!	#NULL!	13600.5	17399.4	#NULL!	#NULL!	#NULL!	#NULL!	#NULL!	#NULL!	#NULL!	#NULL!	#NULL!	#NULL!	#NULL!	512	517	1	2	8	8	8	8	2	8	1	8	2	8	2	8	8	8
A971937201	A9719372	2011	1	1	1	A971	1	40	#NULL!	4	4	3	3	6809.98	12597.4	#NULL!	13977.6	#NULL!	#NULL!	#NULL!	#NULL!	#NULL!	#NULL!	#NULL!	#NULL!	#NULL!	#NULL!	#NULL!	#NULL!	#NULL!	#NULL!	512	517	1	2	8	2	8	8	2	8	1	8	2	8	2	8	8	8
A971937202	A9719372	2011	1	1	1	A971	2	33	#NULL!	4	4	3	3	6809.98	7672.54	#NULL!	#NULL!	#NULL!	#NULL!	#NULL!	#NULL!	#NULL!	#NULL!	#NULL!	#NULL!	#NULL!	#NULL!	#NULL!	#NULL!	#NULL!	#NULL!	512	517	1	2	8	8	8	8	2	8	1	8	2	8	2	8	8	8
A971937203	A9719372	2011	1	1	1	A971	2	12	#NULL!	4	4	1	#NULL!	6809.98	7502.17	12546.3	#NULL!	#NULL!	#NULL!	#NULL!	#NULL!	#NULL!	#NULL!	#NULL!	#NULL!	#NULL!	#NULL!	#NULL!	#NULL!	#NULL!	#NULL!	512	517	1	2	8	8	8	8	8	8	1	8	1	1	2	8	8	8
A971937204	A9719372	2011	1	1	1	A971	1	8	#NULL!	4	4	1	#NULL!	6809.98	5304.16	#NULL!	#NULL!	#NULL!	#NULL!	#NULL!	#NULL!	#NULL!	#NULL!	#NULL!	#NULL!	#NULL!	#NULL!	#NULL!	#NULL!	#NULL!	#NULL!	512	517	1	1	2	8	8	8	8	8	8	8	8	8	2	8	8	8
A971937301	A9719373	2011	1	1	1	A971	1	30	#NULL!	2	2	4	3	6809.98	9742.08	#NULL!	#NULL!	#NULL!	10232	19737.5	#NULL!	#NULL!	#NULL!	#NULL!	#NULL!	#NULL!	#NULL!	#NULL!	#NULL!	#NULL!	#NULL!	512	517	1	2	8	8	8	8	2	8	1	8	2	8	2	8	8	8
A971937302	A9719373	2011	1	1	1	A971	2	27	#NULL!	2	2	3	7	6809.98	12568.7	20427	#NULL!	#NULL!	11883.8	12433.7	#NULL!	#NULL!	23574.9	#NULL!	#NULL!	#NULL!	#NULL!	#NULL!	#NULL!	#NULL!	#NULL!	512	517	1	1	2	8	8	8	2	8	1	8	2	8	2	8	8	8
A971937701	A9719377	2011	1	1	1	A971	1	55	#NULL!	3	4	1	3	6809.98	6921.05	#NULL!	17540.6	#NULL!	8143.45	8075.14	#NULL!	20279	#NULL!	#NULL!	#NULL!	#NULL!	#NULL!	#NULL!	#NULL!	#NULL!	#NULL!	512	517	1	2	8	2	8	8	2	8	1	8	2	8	2	8	8	8
A971937702	A9719377	2011	1	1	1	A971	2	50	#NULL!	3	4	3	3	6809.98	5905.89	#NULL!	#NULL!	#NULL!	5708.29	6269.72	#NULL!	#NULL!	#NULL!	#NULL!	#NULL!	#NULL!	#NULL!	#NULL!	#NULL!	#NULL!	#NULL!	512	517	1	2	8	2	8	8	2	8	1	8	2	8	2	8	8	8
A971938201	A9719382	2011	1	1	1	A971	2	70	#NULL!	1	1	1	7	6809.98	3981.01	#NULL!	9195.15	#NULL!	#NULL!	#NULL!	#NULL!	#NULL!	#NULL!	#NULL!	#NULL!	#NULL!	#NULL!	#NULL!	#NULL!	#NULL!	#NULL!	512	517	1	2	8	2	8	8	2	8	2	3	2	8	2	8	8	8
A972929201	A9729292	2011	1	1	2	A972	1	58	#NULL!	3	3	4	1	2965.11	2511.22	7247.57	3182.19	#NULL!	3939.67	3906.63	9706.9	3679	8004.3	10720.7	#NULL!	#NULL!	#NULL!	#NULL!	#NULL!	#NULL!	#NULL!	501	501	1	2	8	2	8	8	2	8	3	3	2	8	2	8	8	8
A972929202	A9729292	2011	1	1	2	A972	2	53	#NULL!	3	3	4	1	2965.11	2142.89	#NULL!	2714.1	#NULL!	2761.58	3033.19	#NULL!	2820.03	#NULL!	#NULL!	#NULL!	#NULL!	#NULL!	#NULL!	#NULL!	#NULL!	#NULL!	501	501	1	2	8	2	8	8	2	8	1	8	2	8	2	8	8	8
A972929203	A9729292	2011	1	1	2	A972	2	29	#NULL!	3	3	4	2	2965.11	4560.42	7411.71	#NULL!	#NULL!	5749.22	6015.23	#NULL!	#NULL!	8553.89	#NULL!	#NULL!	#NULL!	#NULL!	#NULL!	#NULL!	#NULL!	#NULL!	501	501	1	2	8	8	8	8	2	8	1	8	2	8	1	2	1	1
A972929204	A9729292	2011	1	1	2	A972	1	28	#NULL!	3	3	4	3	2965.11	5149.62	#NULL!	#NULL!	#NULL!	#NULL!	#NULL!	#NULL!	#NULL!	#NULL!	#NULL!	#NULL!	#NULL!	#NULL!	#NULL!	#NULL!	#NULL!	#NULL!	501	501	1	2	8	8	8	8	2	8	1	8	1	2	2	8	8	8
A972930601	A9729306	2011	1	1	2	A972	1	57	#NULL!	2	3	3	2	2965.11	3348.3	#NULL!	#NULL!	#NULL!	3939.67	3662.46	#NULL!	#NULL!	#NULL!	#NULL!	#NULL!	#NULL!	#NULL!	#NULL!	#NULL!	#NULL!	#NULL!	501	501	1	2	8	2	8	8	2	8	2	3	2	8	1	2	1	1
A972930602	A9729306	2011	1	1	2	A972	2	54	#NULL!	2	3	3	7	2965.11	2857.18	#NULL!	5428.2	#NULL!	2761.58	2843.62	#NULL!	5640.05	#NULL!	#NULL!	#NULL!	#NULL!	#NULL!	#NULL!	#NULL!	#NULL!	#NULL!	501	501	1	2	8	2	8	8	2	8	1	8	2	8	2	8	8	8
A972930603	A9729306	2011	1	1	2	A972	2	29	#NULL!	2	3	4	7	2965.11	6080.56	#NULL!	#NULL!	#NULL!	5749.22	5639.27	#NULL!	#NULL!	#NULL!	#NULL!	#NULL!	#NULL!	#NULL!	#NULL!	#NULL!	#NULL!	#NULL!	501	501	1	2	8	8	8	8	2	8	1	8	2	8	2	8	8	8
A972930605	A9729306	2011	1	1	2	A972	1	1	14	3	3	1	#NULL!	2965.11	2106.82	#NULL!	#NULL!	#NULL!	2082.7	2773.86	#NULL!	#NULL!	#NULL!	#NULL!	#NULL!	#NULL!	#NULL!	#NULL!	#NULL!	#NULL!	#NULL!	501	501	1	8	8	8	8	8	8	8	8	8	8	8	8	8	8	8
A972931101	A9729311	2011	1	1	2	A972	1	50	#NULL!	3	3	4	1	2965.11	5200.23	#NULL!	8347.31	#NULL!	#NULL!	#NULL!	#NULL!	#NULL!	#NULL!	#NULL!	#NULL!	#NULL!	#NULL!	#NULL!	#NULL!	#NULL!	#NULL!	501	501	1	2	8	1	3	2	2	8	1	8	1	1	2	8	8	8
A972931103	A9729311	2011	1	1	2	A972	1	22	#NULL!	3	3	3	7	2965.11	6496.59	14691.5	#NULL!	#NULL!	#NULL!	#NULL!	#NULL!	#NULL!	#NULL!	#NULL!	#NULL!	#NULL!	#NULL!	#NULL!	#NULL!	#NULL!	#NULL!	501	501	1	2	8	8	8	8	2	8	1	8	1	1	2	8	8	8
A972931104	A9729311	2011	1	1	2	A972	2	18	#NULL!	3	3	4	6	2965.11	5431.05	14374.6	#NULL!	#NULL!	#NULL!	#NULL!	#NULL!	#NULL!	#NULL!	#NULL!	#NULL!	#NULL!	#NULL!	#NULL!	#NULL!	#NULL!	#NULL!	501	501	1	2	8	8	8	8	8	8	1	8	2	8	2	8	8	8
A972931602	A9729316	2011	1	1	2	A972	2	53	#NULL!	3	4	4	7	2965.11	3214.33	#NULL!	#NULL!	#NULL!	3106.78	3412.34	#NULL!	#NULL!	#NULL!	#NULL!	#NULL!	#NULL!	#NULL!	#NULL!	#NULL!	#NULL!	#NULL!	501	501	1	2	8	2	8	8	2	8	1	8	2	8	1	1	1	1
A972931603	A9729316	2011	1	1	2	A972	1	22	#NULL!	3	4	3	7	2965.11	6496.59	14691.5	#NULL!	#NULL!	8589.83	13130.3	#NULL!	#NULL!	17268.2	#NULL!	#NULL!	#NULL!	#NULL!	#NULL!	#NULL!	#NULL!	#NULL!	501	501	1	1	2	8	8	8	2	8	1	8	1	1	1	1	1	1
A972931802	A9729318	2011	1	1	2	A972	2	56	#NULL!	4	4	3	7	2965.11	6572.76	15259.4	4397.53	#NULL!	3096.38	7743.45	10800.9	4428.03	15081.2	10816.8	#NULL!	#NULL!	#NULL!	#NULL!	#NULL!	#NULL!	#NULL!	501	501	1	2	8	2	8	8	2	8	1	8	2	8	2	8	8	8
A972932501	A9729325	2011	1	1	2	A972	1	42	#NULL!	3	3	4	2	2965.11	4570.82	#NULL!	#NULL!	#NULL!	5039.99	6349.65	#NULL!	#NULL!	#NULL!	#NULL!	#NULL!	#NULL!	#NULL!	#NULL!	#NULL!	#NULL!	#NULL!	501	501	1	2	8	2	8	8	2	8	1	8	2	8	2	8	8	8
A972932502	A9729325	2011	1	1	2	A972	2	40	#NULL!	3	3	4	7	2965.11	2903.96	#NULL!	8099.26	#NULL!	3064.48	3186.89	#NULL!	7795.37	#NULL!	#NULL!	#NULL!	#NULL!	#NULL!	#NULL!	#NULL!	#NULL!	#NULL!	501	501	1	2	8	2	8	8	2	8	1	8	2	8	1	1	1	1
A972932503	A9729325	2011	1	1	2	A972	2	11	#NULL!	3	3	1	#NULL!	2965.11	2722.07	#NULL!	#NULL!	#NULL!	2892.08	3254.1	#NULL!	#NULL!	#NULL!	#NULL!	#NULL!	#NULL!	#NULL!	#NULL!	#NULL!	#NULL!	#NULL!	501	501	1	1	2	8	8	8	8	8	8	8	8	8	1	1	1	1
A972932504	A9729325	2011	1	1	2	A972	1	8	#NULL!	3	3	1	#NULL!	2965.11	1924.55	#NULL!	#NULL!	#NULL!	1760.48	2577.44	#NULL!	#NULL!	#NULL!	#NULL!	#NULL!	#NULL!	#NULL!	#NULL!	#NULL!	#NULL!	#NULL!	501	501	1	1	2	8	8	8	8	8	8	8	8	8	2	8	8	8
A972933202	A9729332	2011	1	1	2	A972	2	40	#NULL!	2	2	3	7	2965.11	2903.96	11186	#NULL!	#NULL!	3064.48	3186.89	#NULL!	#NULL!	19914	#NULL!	#NULL!	#NULL!	#NULL!	#NULL!	#NULL!	#NULL!	#NULL!	501	501	1	1	1	1	1	2	2	8	1	8	2	8	1	2	2	2
A972933203	A9729332	2011	1	1	2	A972	1	13	#NULL!	2	2	1	#NULL!	2965.11	1916.87	#NULL!	#NULL!	#NULL!	1967.3	3023.12	#NULL!	#NULL!	#NULL!	#NULL!	#NULL!	#NULL!	#NULL!	#NULL!	#NULL!	#NULL!	#NULL!	501	501	1	2	8	8	8	8	8	8	1	8	2	8	2	8	8	8
A972933204	A9729332	2011	1	1	2	A972	1	11	#NULL!	2	2	1	#NULL!	2965.11	1916.87	#NULL!	#NULL!	#NULL!	1967.3	3023.12	#NULL!	#NULL!	#NULL!	#NULL!	#NULL!	#NULL!	#NULL!	#NULL!	#NULL!	#NULL!	#NULL!	501	501	1	2	8	8	8	8	8	8	8	8	8	8	1	1	1	1
A972933205	A9729332	2011	1	1	2	A972	1	8	#NULL!	2	2	1	#NULL!	2965.11	1924.55	#NULL!	#NULL!	#NULL!	1760.48	2577.44	#NULL!	#NULL!	#NULL!	#NULL!	#NULL!	#NULL!	#NULL!	#NULL!	#NULL!	#NULL!	#NULL!	501	501	1	2	8	8	8	8	8	8	8	8	8	8	2	8	8	8
A972933701	A9729337	2011	1	1	2	A972	1	38	#NULL!	1	2	3	5	2965.11	4071.02	10692.9	#NULL!	#NULL!	4082.01	5969.62	#NULL!	#NULL!	20803	#NULL!	#NULL!	#NULL!	#NULL!	#NULL!	#NULL!	#NULL!	#NULL!	501	501	1	2	8	8	8	8	2	8	1	8	2	8	2	8	8	8
A972933702	A9729337	2011	1	1	2	A972	2	35	#NULL!	1	2	3	7	2965.11	2341.64	#NULL!	#NULL!	#NULL!	2457.21	2876.13	#NULL!	#NULL!	#NULL!	#NULL!	#NULL!	#NULL!	#NULL!	#NULL!	#NULL!	#NULL!	#NULL!	501	501	1	2	8	8	8	8	2	8	1	8	2	8	2	8	8	8
A972933703	A9729337	2011	1	1	2	A972	2	15	#NULL!	1	2	1	7	2965.11	3620.7	#NULL!	#NULL!	#NULL!	3893.62	4840.15	#NULL!	#NULL!	#NULL!	#NULL!	#NULL!	#NULL!	#NULL!	#NULL!	#NULL!	#NULL!	#NULL!	501	501	1	2	8	8	8	8	8	8	1	8	2	8	2	8	8	8
A972933704	A9729337	2011	1	1	2	A972	1	8	#NULL!	1	2	1	#NULL!	2965.11	1924.55	#NULL!	#NULL!	#NULL!	1760.48	2577.44	#NULL!	#NULL!	#NULL!	#NULL!	#NULL!	#NULL!	#NULL!	#NULL!	#NULL!	#NULL!	#NULL!	501	501	1	2	8	8	8	8	8	8	8	8	8	8	1	2	2	1
A972934501	A9729345	2011	1	1	2	A972	1	44	#NULL!	3	3	4	2	2965.11	4570.82	11050.6	5071.6	#NULL!	#NULL!	#NULL!	7552.86	#NULL!	#NULL!	#NULL!	#NULL!	#NULL!	#NULL!	#NULL!	#NULL!	#NULL!	#NULL!	501	501	1	2	8	2	8	8	2	8	1	8	2	8	2	8	8	8
A972934502	A9729345	2011	1	1	2	A972	2	37	#NULL!	3	3	4	7	2965.11	2341.64	#NULL!	#NULL!	#NULL!	3685.81	3595.16	#NULL!	#NULL!	#NULL!	#NULL!	#NULL!	#NULL!	#NULL!	#NULL!	#NULL!	#NULL!	#NULL!	501	501	1	2	8	8	8	8	2	8	1	8	2	8	2	8	8	8
A972934503	A9729345	2011	1	1	2	A972	2	12	#NULL!	3	3	1	#NULL!	2965.11	2722.07	9104.59	#NULL!	#NULL!	4338.12	4067.63	#NULL!	#NULL!	10658.9	#NULL!	#NULL!	#NULL!	#NULL!	#NULL!	#NULL!	#NULL!	#NULL!	501	501	1	2	8	8	8	8	8	8	1	8	1	1	2	8	8	8
A972934504	A9729345	2011	1	1	2	A972	2	7	#NULL!	4	3	1	#NULL!	2965.11	1826.44	#NULL!	#NULL!	#NULL!	2981.57	3127.01	#NULL!	#NULL!	#NULL!	#NULL!	#NULL!	#NULL!	#NULL!	#NULL!	#NULL!	#NULL!	#NULL!	501	501	1	2	8	8	8	8	8	8	8	8	8	8	1	1	2	2
A972934505	A9729345	2011	1	1	2	A972	1	5	64	3	3	1	#NULL!	2965.11	1924.55	#NULL!	#NULL!	#NULL!	2640.72	3221.8	#NULL!	#NULL!	#NULL!	#NULL!	#NULL!	#NULL!	#NULL!	#NULL!	#NULL!	#NULL!	#NULL!	501	501	1	2	8	8	8	8	8	8	8	8	8	8	8	8	8	8
A972934901	A9729349	2011	1	1	2	A972	1	55	#NULL!	3	4	4	1	2965.11	3766.84	10871.4	6364.39	#NULL!	4432.13	4394.96	9706.9	7358.01	12006.5	10720.7	#NULL!	#NULL!	#NULL!	#NULL!	#NULL!	#NULL!	#NULL!	501	501	1	2	8	2	8	8	2	8	1	8	2	8	2	8	8	8
A972934902	A9729349	2011	1	1	2	A972	2	56	#NULL!	4	4	3	7	2965.11	2464.78	#NULL!	#NULL!	#NULL!	2322.29	2903.8	#NULL!	#NULL!	#NULL!	#NULL!	#NULL!	#NULL!	#NULL!	#NULL!	#NULL!	#NULL!	#NULL!	501	501	1	2	8	2	8	8	2	8	2	3	1	2	1	2	1	1
A972935402	A9729354	2011	1	1	2	A972	2	40	#NULL!	2	3	3	7	2965.11	4355.93	#NULL!	12148.9	#NULL!	4596.72	3983.61	#NULL!	11693.1	#NULL!	#NULL!	#NULL!	#NULL!	#NULL!	#NULL!	#NULL!	#NULL!	#NULL!	501	501	1	2	8	2	8	8	2	8	1	8	2	8	2	8	8	8
A972935403	A9729354	2011	1	1	2	A972	2	11	#NULL!	2	3	1	#NULL!	2965.11	4083.11	#NULL!	#NULL!	#NULL!	4338.12	4067.63	#NULL!	#NULL!	#NULL!	#NULL!	#NULL!	#NULL!	#NULL!	#NULL!	#NULL!	#NULL!	#NULL!	501	501	1	1	2	8	8	8	8	8	8	8	8	8	1	1	1	1
A972935404	A9729354	2011	1	1	2	A972	2	5	63	2	3	1	#NULL!	2965.11	2739.66	#NULL!	#NULL!	#NULL!	2981.57	3127.01	#NULL!	#NULL!	#NULL!	#NULL!	#NULL!	#NULL!	#NULL!	#NULL!	#NULL!	#NULL!	#NULL!	501	501	1	2	8	8	8	8	8	8	8	8	8	8	8	8	8	8
A972935405	A9729354	2011	1	1	2	A972	2	69	#NULL!	3	3	1	7	2965.11	2420.94	9841.87	#NULL!	#NULL!	3506.92	1901.52	#NULL!	#NULL!	14081.9	#NULL!	#NULL!	#NULL!	#NULL!	#NULL!	#NULL!	#NULL!	#NULL!	501	501	1	2	8	1	2	1	2	8	1	8	1	2	1	2	1	1
A972936001	A9729360	2011	1	1	2	A972	2	49	#NULL!	3	4	3	3	2965.11	3572.27	#NULL!	7254.19	#NULL!	3356.63	4135.59	#NULL!	7633.28	#NULL!	#NULL!	#NULL!	#NULL!	#NULL!	#NULL!	#NULL!	#NULL!	#NULL!	501	501	1	2	8	1	2	2	2	8	1	8	2	8	2	8	8	8
A972936003	A9729360	2011	1	1	2	A972	1	23	#NULL!	3	4	3	7	2965.11	5774.75	#NULL!	#NULL!	#NULL!	7635.41	11671.4	#NULL!	#NULL!	#NULL!	#NULL!	#NULL!	#NULL!	#NULL!	#NULL!	#NULL!	#NULL!	#NULL!	501	501	1	1	2	8	8	8	2	8	1	8	2	8	2	8	8	8
A972936004	A9729360	2011	1	1	2	A972	2	20	#NULL!	3	4	3	3	2965.11	5364.16	16496.4	#NULL!	#NULL!	7227.89	7260.02	#NULL!	#NULL!	18770.3	#NULL!	#NULL!	#NULL!	#NULL!	#NULL!	#NULL!	#NULL!	#NULL!	501	501	1	1	2	8	8	8	2	8	1	8	1	2	1	1	1	1
A972936901	A9729369	2011	1	1	2	A972	2	55	#NULL!	3	3	3	2	2965.11	1643.19	#NULL!	2198.77	#NULL!	1548.19	1935.86	#NULL!	2214.01	#NULL!	#NULL!	#NULL!	#NULL!	#NULL!	#NULL!	#NULL!	#NULL!	#NULL!	501	501	1	2	8	1	1	2	2	8	1	8	2	8	2	8	8	8
A972936902	A9729369	2011	1	1	2	A972	1	65	#NULL!	3	3	4	6	2965.11	1329.16	5176.42	2557.11	#NULL!	1611.15	1716.33	8176.09	2787.11	5434.12	8529.24	#NULL!	#NULL!	#NULL!	#NULL!	#NULL!	#NULL!	#NULL!	501	501	1	2	8	2	8	8	2	8	1	8	2	8	2	8	8	8
A972936903	A9729369	2011	1	1	2	A972	1	15	#NULL!	2	3	2	7	2965.11	3397	11689.5	#NULL!	#NULL!	3798.56	5478.4	#NULL!	#NULL!	11001.6	#NULL!	#NULL!	#NULL!	#NULL!	#NULL!	#NULL!	#NULL!	#NULL!	501	501	1	1	2	8	8	8	8	8	1	8	2	8	1	1	1	1
A972936904	A9729369	2011	1	1	2	A972	1	15	#NULL!	2	3	2	7	2965.11	3397	#NULL!	#NULL!	#NULL!	3798.56	5478.4	#NULL!	#NULL!	#NULL!	#NULL!	#NULL!	#NULL!	#NULL!	#NULL!	#NULL!	#NULL!	#NULL!	501	501	1	1	2	8	8	8	8	8	1	8	2	8	1	2	1	2
A972937302	A9729373	2011	1	1	2	A972	2	55	#NULL!	3	3	2	7	2965.11	3286.38	#NULL!	4397.53	#NULL!	3096.38	3871.73	#NULL!	4428.03	#NULL!	#NULL!	#NULL!	#NULL!	#NULL!	#NULL!	#NULL!	#NULL!	#NULL!	501	501	1	2	8	2	8	8	2	8	2	3	1	1	1	2	2	2
A972937303	A9729373	2011	1	1	2	A972	1	30	#NULL!	3	3	4	7	2965.11	7069.6	#NULL!	#NULL!	#NULL!	7425.15	14323	#NULL!	#NULL!	#NULL!	#NULL!	#NULL!	#NULL!	#NULL!	#NULL!	#NULL!	#NULL!	#NULL!	501	501	1	2	8	8	8	8	2	8	1	8	2	8	2	8	8	8
A972937901	A9729379	2011	1	1	2	A972	1	33	#NULL!	3	3	3	1	2965.11	4713.07	#NULL!	#NULL!	#NULL!	3712.57	8593.81	#NULL!	#NULL!	#NULL!	#NULL!	#NULL!	#NULL!	#NULL!	#NULL!	#NULL!	#NULL!	#NULL!	501	501	1	2	8	8	8	8	2	8	1	8	2	8	2	8	8	8
A972937902	A9729379	2011	1	1	2	A972	2	31	#NULL!	3	3	4	1	2965.11	3711.86	21274.6	#NULL!	#NULL!	2960.86	4545.48	#NULL!	#NULL!	22297.8	#NULL!	#NULL!	#NULL!	#NULL!	#NULL!	#NULL!	#NULL!	#NULL!	501	501	1	1	2	8	8	8	2	8	1	8	2	8	2	8	8	8
A972937903	A9729379	2011	1	1	2	A972	1	5	66	3	3	1	#NULL!	2965.11	2566.07	#NULL!	#NULL!	#NULL!	1760.48	3092.93	#NULL!	#NULL!	#NULL!	#NULL!	#NULL!	#NULL!	#NULL!	#NULL!	#NULL!	#NULL!	#NULL!	501	501	1	2	8	8	8	8	8	8	8	8	8	8	8	8	8	8
A972937904	A9729379	2011	1	1	2	A972	1	3	36	3	3	1	#NULL!	2965.11	2106.82	#NULL!	#NULL!	#NULL!	1562.02	2662.91	#NULL!	#NULL!	#NULL!	#NULL!	#NULL!	#NULL!	#NULL!	#NULL!	#NULL!	#NULL!	#NULL!	501	501	1	8	8	8	8	8	8	8	8	8	8	8	8	8	8	8
A972937906	A9729379	2011	1	1	2	A972	2	53	#NULL!	2	3	1	3	2965.11	2857.18	#NULL!	5428.2	#NULL!	2071.19	2729.87	#NULL!	5640.05	#NULL!	#NULL!	#NULL!	#NULL!	#NULL!	#NULL!	#NULL!	#NULL!	#NULL!	501	501	1	2	8	2	8	8	2	8	1	8	2	8	2	8	8	8
A973929802	A9739298	2011	1	1	2	A973	2	40	#NULL!	4	4	4	7	2868.46	6742.33	#NULL!	4701.16	#NULL!	3557.51	5549.43	#NULL!	4524.77	#NULL!	#NULL!	#NULL!	#NULL!	#NULL!	#NULL!	#NULL!	#NULL!	#NULL!	501	501	1	2	8	2	8	8	2	8	1	8	1	1	2	8	8	8
A973929803	A9739298	2011	1	1	2	A973	2	13	#NULL!	4	4	1	#NULL!	2868.46	6320.04	5284.7	#NULL!	#NULL!	3357.38	5666.47	#NULL!	#NULL!	12373.8	#NULL!	#NULL!	#NULL!	#NULL!	#NULL!	#NULL!	#NULL!	#NULL!	501	501	1	1	1	8	8	8	8	8	1	8	1	1	1	1	1	1
A973930301	A9739303	2011	1	1	2	A973	1	54	#NULL!	4	4	4	2	2868.46	4024.59	#NULL!	4845.14	#NULL!	6224.74	6859.31	#NULL!	5863.81	#NULL!	#NULL!	#NULL!	#NULL!	#NULL!	#NULL!	#NULL!	#NULL!	#NULL!	501	501	1	2	8	1	2	2	1	1	1	8	2	8	1	1	2	1
A973930302	A9739303	2011	1	1	2	A973	2	55	#NULL!	4	4	4	7	2868.46	1907.56	#NULL!	2552.52	#NULL!	2396.37	2996.43	#NULL!	2570.22	#NULL!	#NULL!	#NULL!	#NULL!	#NULL!	#NULL!	#NULL!	#NULL!	#NULL!	501	501	1	2	8	2	8	8	2	8	1	8	2	8	2	8	8	8
A973930303	A9739303	2011	1	1	2	A973	2	21	#NULL!	4	4	3	7	2868.46	4670.39	9575.22	#NULL!	#NULL!	#NULL!	#NULL!	#NULL!	#NULL!	#NULL!	#NULL!	#NULL!	#NULL!	#NULL!	#NULL!	#NULL!	#NULL!	#NULL!	501	501	1	1	2	8	8	8	2	8	1	8	1	1	1	2	1	1
A973930304	A9739303	2011	1	1	2	A973	1	19	#NULL!	4	4	3	3	2868.46	3943.53	13570.1	#NULL!	#NULL!	5879.6	8479.74	#NULL!	#NULL!	25543.3	#NULL!	#NULL!	#NULL!	#NULL!	#NULL!	#NULL!	#NULL!	#NULL!	501	501	1	2	8	8	8	8	2	8	1	8	2	8	2	8	8	8
A973930701	A9739307	2011	1	1	2	A973	1	44	#NULL!	4	4	#NULL!	#NULL!	2868.46	5306.21	#NULL!	#NULL!	#NULL!	5850.87	7371.23	#NULL!	#NULL!	#NULL!	#NULL!	#NULL!	#NULL!	#NULL!	#NULL!	#NULL!	#NULL!	#NULL!	501	501	1	1	9	2	8	8	2	8	1	8	2	8	1	1	2	1
A973930702	A9739307	2011	1	1	2	A973	2	42	#NULL!	4	4	4	7	2868.46	3371.17	12985.6	9402.33	#NULL!	3557.51	3699.62	18338	9049.55	17338.4	18668.2	#NULL!	#NULL!	#NULL!	#NULL!	#NULL!	#NULL!	#NULL!	501	501	1	2	8	2	8	8	2	8	1	8	2	8	2	8	8	8
A973930703	A9739307	2011	1	1	2	A973	2	13	#NULL!	4	4	1	#NULL!	2868.46	3160.02	#NULL!	#NULL!	#NULL!	3357.38	3777.65	#NULL!	#NULL!	#NULL!	#NULL!	#NULL!	#NULL!	#NULL!	#NULL!	#NULL!	#NULL!	#NULL!	501	501	1	9	9	8	8	8	8	8	1	8	2	8	1	2	1	1
A973930704	A9739307	2011	1	1	2	A973	1	8	#NULL!	4	4	1	#NULL!	2868.46	2234.19	#NULL!	#NULL!	#NULL!	2043.72	2992.12	#NULL!	#NULL!	#NULL!	#NULL!	#NULL!	#NULL!	#NULL!	#NULL!	#NULL!	#NULL!	#NULL!	501	501	1	2	8	8	8	8	8	8	8	8	8	8	2	8	8	8
A973931501	A9739315	2011	1	1	2	A973	1	55	#NULL!	4	4	4	1	2868.46	2915.25	8413.62	3694.17	#NULL!	3430.14	3401.37	11268.6	4270.91	6969.07	12445.5	#NULL!	#NULL!	#NULL!	#NULL!	#NULL!	#NULL!	#NULL!	501	501	1	1	2	2	8	8	2	8	1	8	2	8	1	2	1	1
A973931502	A9739315	2011	1	1	2	A973	2	46	#NULL!	4	4	3	7	2868.46	3110.25	#NULL!	4210.65	#NULL!	2922.5	3600.72	#NULL!	4430.69	#NULL!	#NULL!	#NULL!	#NULL!	#NULL!	#NULL!	#NULL!	#NULL!	#NULL!	501	501	1	1	2	2	8	8	2	8	1	8	1	1	1	2	2	2
A973931503	A9739315	2011	1	1	2	A973	2	10	#NULL!	4	4	1	#NULL!	2868.46	3160.02	10569.4	#NULL!	#NULL!	3357.38	3777.65	#NULL!	#NULL!	6186.89	#NULL!	#NULL!	#NULL!	#NULL!	#NULL!	#NULL!	#NULL!	#NULL!	501	501	1	2	8	8	8	8	8	8	8	8	8	8	2	8	8	8
A973931801	A9739318	2011	1	1	2	A973	1	27	#NULL!	4	4	3	2	2868.46	11956.2	#NULL!	#NULL!	#NULL!	#NULL!	#NULL!	#NULL!	#NULL!	#NULL!	#NULL!	#NULL!	#NULL!	#NULL!	#NULL!	#NULL!	#NULL!	#NULL!	501	501	1	2	8	8	8	8	2	8	1	8	2	8	2	8	8	8
A973932402	A9739324	2011	1	1	2	A973	2	36	#NULL!	4	4	4	7	2868.46	5436.75	#NULL!	#NULL!	#NULL!	5705.08	4451.81	#NULL!	#NULL!	#NULL!	#NULL!	#NULL!	#NULL!	#NULL!	#NULL!	#NULL!	#NULL!	#NULL!	501	501	1	2	8	8	8	8	2	8	1	8	2	8	2	8	8	8
A973932403	A9739324	2011	1	1	2	A973	2	8	#NULL!	4	4	1	#NULL!	2868.46	4240.58	#NULL!	#NULL!	#NULL!	4615.02	3872.11	#NULL!	#NULL!	#NULL!	#NULL!	#NULL!	#NULL!	#NULL!	#NULL!	#NULL!	#NULL!	#NULL!	501	501	1	2	8	8	8	8	8	8	8	8	8	8	2	8	8	8
A973932404	A9739324	2011	1	1	2	A973	2	6	73	4	4	1	#NULL!	2868.46	4240.58	#NULL!	#NULL!	#NULL!	4615.02	3872.11	#NULL!	#NULL!	#NULL!	#NULL!	#NULL!	#NULL!	#NULL!	#NULL!	#NULL!	#NULL!	#NULL!	501	501	1	2	8	8	8	8	8	8	8	8	8	8	2	8	8	8
A973933201	A9739332	2011	1	1	2	A973	2	58	#NULL!	4	4	4	7	2868.46	3815.11	8857.23	2552.52	#NULL!	3594.55	4494.64	6269.33	2570.22	8753.82	6278.57	#NULL!	#NULL!	#NULL!	#NULL!	#NULL!	#NULL!	#NULL!	501	501	1	2	8	2	8	8	2	8	2	3	2	8	2	8	8	8
A973933402	A9739334	2011	1	1	2	A973	2	49	#NULL!	4	4	4	7	2868.46	6220.51	#NULL!	#NULL!	#NULL!	5845	7201.44	#NULL!	#NULL!	#NULL!	#NULL!	#NULL!	#NULL!	#NULL!	#NULL!	#NULL!	#NULL!	#NULL!	501	501	1	2	8	2	8	8	2	8	1	8	2	8	2	8	8	8
A973933801	A9739338	2011	1	1	2	A973	2	54	#NULL!	4	4	4	7	2868.46	2487.65	#NULL!	3150.77	#NULL!	2404.42	2640.9	#NULL!	3273.73	#NULL!	#NULL!	#NULL!	#NULL!	#NULL!	#NULL!	#NULL!	#NULL!	#NULL!	501	501	1	2	8	2	8	8	2	8	1	8	2	8	2	8	8	8
A973934402	A9739344	2011	1	1	2	A973	1	63	#NULL!	4	4	4	2	2868.46	3025.54	5279.2	2619.2	#NULL!	#NULL!	#NULL!	5127.13	#NULL!	#NULL!	#NULL!	#NULL!	#NULL!	#NULL!	#NULL!	#NULL!	#NULL!	#NULL!	501	501	1	2	8	2	8	8	2	8	2	3	2	8	2	8	8	8
A973934403	A9739344	2011	1	1	2	A973	2	62	#NULL!	4	4	3	7	2868.46	2975.69	5360.51	2141.06	#NULL!	3143.88	5759.35	5070.17	4475.52	10921.2	10567.6	#NULL!	#NULL!	#NULL!	#NULL!	#NULL!	#NULL!	#NULL!	501	501	1	2	8	2	8	8	2	8	1	8	1	2	1	1	1	1
A973934501	A9739345	2011	1	1	2	A973	1	54	#NULL!	4	4	4	2	2868.46	4024.59	#NULL!	9690.29	#NULL!	4668.56	5144.48	#NULL!	11727.6	#NULL!	#NULL!	#NULL!	#NULL!	#NULL!	#NULL!	#NULL!	#NULL!	#NULL!	501	501	1	2	8	2	8	8	2	8	1	8	2	8	2	8	8	8
A973934502	A9739345	2011	1	1	2	A973	2	56	#NULL!	4	4	4	7	2868.46	1907.56	#NULL!	#NULL!	#NULL!	1797.28	2247.32	#NULL!	#NULL!	#NULL!	#NULL!	#NULL!	#NULL!	#NULL!	#NULL!	#NULL!	#NULL!	#NULL!	501	501	1	2	8	2	8	8	2	8	1	8	2	8	2	8	8	8
A973934503	A9739345	2011	1	1	2	A973	1	26	#NULL!	4	4	4	7	2868.46	5978.12	11066.1	#NULL!	#NULL!	8028.25	10369	#NULL!	#NULL!	12956.5	#NULL!	#NULL!	#NULL!	#NULL!	#NULL!	#NULL!	#NULL!	#NULL!	501	501	1	2	8	8	8	8	2	8	1	8	2	8	2	8	8	8
A973934504	A9739345	2011	1	1	2	A973	1	24	#NULL!	4	4	3	3	2868.46	5027.87	11370.1	#NULL!	#NULL!	6647.89	10161.8	#NULL!	#NULL!	13364.3	#NULL!	#NULL!	#NULL!	#NULL!	#NULL!	#NULL!	#NULL!	#NULL!	501	501	1	2	8	8	8	8	2	8	1	8	2	8	2	8	8	8
A973935101	A9739351	2011	1	1	2	A973	1	56	#NULL!	3	3	4	1	2868.46	2915.25	#NULL!	3694.17	#NULL!	3430.14	3401.37	#NULL!	4270.91	#NULL!	#NULL!	#NULL!	#NULL!	#NULL!	#NULL!	#NULL!	#NULL!	#NULL!	501	501	1	2	8	2	8	8	2	8	2	3	2	8	2	8	8	8
A973935102	A9739351	2011	1	1	2	A973	2	52	#NULL!	3	3	4	7	2868.46	2487.65	#NULL!	3150.77	#NULL!	2404.42	2640.9	#NULL!	3273.73	#NULL!	#NULL!	#NULL!	#NULL!	#NULL!	#NULL!	#NULL!	#NULL!	#NULL!	501	501	1	2	8	2	8	8	2	8	1	8	1	1	2	8	8	8
A973935103	A9739351	2011	1	1	2	A973	1	26	#NULL!	3	3	4	7	2868.46	5978.12	11066.1	#NULL!	#NULL!	8028.25	10369	#NULL!	#NULL!	12956.5	#NULL!	#NULL!	#NULL!	#NULL!	#NULL!	#NULL!	#NULL!	#NULL!	501	501	1	2	8	8	8	8	2	8	1	8	2	8	2	8	8	8
A973935104	A9739351	2011	1	1	2	A973	2	25	#NULL!	3	3	4	7	2868.46	5294.13	8604.17	#NULL!	#NULL!	5005.65	5237.25	#NULL!	#NULL!	9930.11	#NULL!	#NULL!	#NULL!	#NULL!	#NULL!	#NULL!	#NULL!	#NULL!	501	501	1	2	8	8	8	8	2	8	1	8	2	8	2	8	8	8
A973935701	A9739357	2011	1	1	2	A973	1	63	#NULL!	4	4	4	7	2868.46	4034.06	#NULL!	5238.39	#NULL!	3075.29	4293.82	#NULL!	5871.27	#NULL!	#NULL!	#NULL!	#NULL!	#NULL!	#NULL!	#NULL!	#NULL!	#NULL!	501	501	1	2	8	2	8	8	2	8	2	3	2	8	2	8	8	8
A973935703	A9739357	2011	1	1	2	A973	1	35	#NULL!	4	4	4	7	2868.46	9452	24826.4	#NULL!	#NULL!	6318.33	13860.1	#NULL!	#NULL!	32200	#NULL!	#NULL!	#NULL!	#NULL!	#NULL!	#NULL!	#NULL!	#NULL!	501	501	1	2	8	8	8	8	2	8	1	8	2	8	2	8	8	8
A973936401	A9739364	2011	1	1	2	A973	1	55	#NULL!	4	4	4	7	2868.46	5830.5	8413.62	#NULL!	#NULL!	6860.28	6802.73	#NULL!	#NULL!	9292.1	#NULL!	#NULL!	#NULL!	#NULL!	#NULL!	#NULL!	#NULL!	#NULL!	501	501	1	2	8	1	2	2	2	8	2	3	2	8	2	8	8	8
A973937301	A9739373	2011	1	1	2	A973	2	47	#NULL!	4	4	4	7	2868.46	3110.25	#NULL!	4210.65	#NULL!	2922.5	3600.72	#NULL!	4430.69	#NULL!	#NULL!	#NULL!	#NULL!	#NULL!	#NULL!	#NULL!	#NULL!	#NULL!	501	501	1	2	8	2	8	8	2	8	1	8	2	8	2	8	8	8
A973937303	A9739373	2011	1	1	2	A973	2	17	#NULL!	4	4	2	7	2868.46	4203.22	#NULL!	#NULL!	#NULL!	4520.05	5618.87	#NULL!	#NULL!	#NULL!	#NULL!	#NULL!	#NULL!	#NULL!	#NULL!	#NULL!	#NULL!	#NULL!	501	501	1	2	8	8	8	8	8	8	1	8	2	8	2	8	8	8
A973937304	A9739373	2011	1	1	2	A973	2	15	#NULL!	4	4	2	7	2868.46	4203.22	11124.8	#NULL!	#NULL!	4520.05	5618.87	#NULL!	#NULL!	15718.5	#NULL!	#NULL!	#NULL!	#NULL!	#NULL!	#NULL!	#NULL!	#NULL!	501	501	1	2	8	8	8	8	8	8	1	8	2	8	1	1	2	1
A973938002	A9739380	2011	1	1	2	A973	2	35	#NULL!	4	4	4	7	2868.46	8155.13	19653.3	#NULL!	#NULL!	8557.62	5564.77	#NULL!	#NULL!	19406.5	#NULL!	#NULL!	#NULL!	#NULL!	#NULL!	#NULL!	#NULL!	#NULL!	501	501	1	2	8	8	8	8	2	8	1	8	2	8	2	8	8	8
A973938003	A9739380	2011	1	1	2	A973	1	4	58	4	4	1	#NULL!	2868.46	5503	#NULL!	#NULL!	#NULL!	5439.99	4293.53	#NULL!	#NULL!	#NULL!	#NULL!	#NULL!	#NULL!	#NULL!	#NULL!	#NULL!	#NULL!	#NULL!	501	501	1	2	8	8	8	8	8	8	8	8	8	8	8	8	8	8
A973938004	A9739380	2011	1	1	2	A973	1	4	58	4	4	1	#NULL!	2868.46	5503	#NULL!	#NULL!	#NULL!	5439.99	4293.53	#NULL!	#NULL!	#NULL!	#NULL!	#NULL!	#NULL!	#NULL!	#NULL!	#NULL!	#NULL!	#NULL!	501	501	1	2	8	8	8	8	8	8	8	8	8	8	8	8	8	8
A973938302	A9739383	2011	1	1	2	A973	2	38	#NULL!	#NULL!	#NULL!	4	7	2868.46	5436.75	#NULL!	#NULL!	#NULL!	5705.08	5564.77	#NULL!	#NULL!	#NULL!	#NULL!	#NULL!	#NULL!	#NULL!	#NULL!	#NULL!	#NULL!	#NULL!	501	501	1	2	8	8	8	8	2	8	1	8	2	8	2	8	8	8
A973938304	A9739383	2011	1	1	2	A973	2	6	72	#NULL!	#NULL!	1	#NULL!	2868.46	4240.58	#NULL!	#NULL!	#NULL!	4615.02	4840.14	#NULL!	#NULL!	#NULL!	#NULL!	#NULL!	#NULL!	#NULL!	#NULL!	#NULL!	#NULL!	#NULL!	501	501	1	2	8	8	8	8	8	8	8	8	8	8	2	8	8	8
A973938305	A9739383	2011	1	1	2	A973	2	4	53	#NULL!	#NULL!	1	#NULL!	2868.46	3410.22	#NULL!	#NULL!	#NULL!	3274.32	4354.12	#NULL!	#NULL!	#NULL!	#NULL!	#NULL!	#NULL!	#NULL!	#NULL!	#NULL!	#NULL!	#NULL!	501	501	1	2	8	8	8	8	8	8	8	8	8	8	8	8	8	8
A974933001	A9749330	2011	1	1	1	A974	1	64	#NULL!	4	4	4	1	7057.98	7444.48	#NULL!	9666.96	21406.9	8512.76	7923.85	#NULL!	10834.9	#NULL!	#NULL!	20740.4	24922.5	#NULL!	27329.3	#NULL!	#NULL!	#NULL!	512	517	1	2	8	2	8	8	2	8	1	8	2	8	2	8	8	8
A974933002	A9749330	2011	1	1	1	A974	2	59	#NULL!	3	4	4	7	7057.98	7040.44	32690.4	9420.88	22317.2	6633.41	8294.44	46277.8	9486.21	32308.7	46346.1	20065.2	24112.7	87936.7	23874.2	88801.2	130293	129499	512	517	1	2	8	2	8	8	1	1	1	8	2	8	2	8	8	8
A974933401	A9749334	2011	1	1	1	A974	2	52	#NULL!	4	4	3	3	7057.98	6120.97	#NULL!	7752.6	18552.9	5916.17	6498.04	#NULL!	8055.16	#NULL!	#NULL!	15600.7	18749.3	#NULL!	19055	#NULL!	#NULL!	#NULL!	512	517	1	2	8	2	8	8	1	2	2	3	2	8	2	8	8	8
A974933402	A9749334	2011	1	1	1	A974	2	27	#NULL!	4	4	4	3	7057.98	13026.4	15878.2	#NULL!	31850.8	12316.6	12886.5	#NULL!	#NULL!	18325.1	#NULL!	32707.5	#NULL!	43841.9	#NULL!	45397.8	#NULL!	#NULL!	512	517	1	2	8	8	8	8	1	2	1	8	2	8	2	8	8	8
A974933403	A9749334	2011	1	1	1	A974	1	31	#NULL!	4	4	4	1	7057.98	10096.9	28313	#NULL!	44878.2	10604.6	20456.2	#NULL!	#NULL!	36671.8	#NULL!	59265.4	#NULL!	86064	#NULL!	122752	#NULL!	#NULL!	512	517	1	2	8	8	8	8	2	8	1	8	2	8	2	8	8	8
A974933502	A9749335	2011	1	1	1	A974	2	41	#NULL!	2	2	4	7	7057.98	18032.4	#NULL!	22963.5	49032.2	8753.41	15171.8	#NULL!	24879.3	#NULL!	#NULL!	55187.7	61684.8	#NULL!	67122.3	#NULL!	#NULL!	#NULL!	512	517	1	2	8	1	2	2	2	8	1	8	1	1	1	1	1	1
A974933503	A9749335	2011	1	1	1	A974	2	8	#NULL!	2	2	1	#NULL!	7057.98	15651.2	#NULL!	#NULL!	#NULL!	5677.72	11909.4	#NULL!	#NULL!	#NULL!	#NULL!	#NULL!	#NULL!	#NULL!	#NULL!	#NULL!	#NULL!	#NULL!	512	517	1	1	1	8	8	8	8	8	8	8	8	8	1	1	2	2
A974933504	A9749335	2011	1	1	1	A974	1	5	62	2	2	1	#NULL!	7057.98	16492	#NULL!	#NULL!	#NULL!	5028.65	12270.4	#NULL!	#NULL!	#NULL!	#NULL!	#NULL!	#NULL!	#NULL!	#NULL!	#NULL!	#NULL!	#NULL!	512	517	1	1	1	8	8	8	8	8	8	8	8	8	8	8	8	8
A974934302	A9749343	2011	1	1	1	A974	2	49	#NULL!	1	2	3	3	7057.98	17956.9	43045.3	20721	49681.7	19125.4	19679.1	39918.6	21803.8	55918.3	41800.1	53033	48150.9	123689	49130.2	132894	95676.7	102005	512	517	1	2	8	2	8	8	2	8	1	8	2	8	2	8	8	8
A974934701	A9749347	2011	1	1	1	A974	2	79	#NULL!	1	1	1	6	7057.98	4353.06	#NULL!	#NULL!	12090.2	4325.88	4331.8	#NULL!	#NULL!	#NULL!	#NULL!	10975.1	#NULL!	#NULL!	#NULL!	#NULL!	#NULL!	#NULL!	512	517	1	2	8	2	8	8	2	8	1	8	2	8	2	8	8	8
A974934901	A9749349	2011	1	1	1	A974	1	68	#NULL!	2	1	4	7	7057.98	3796.63	#NULL!	7304.15	10002.4	4602.11	4902.54	#NULL!	7961.15	#NULL!	#NULL!	10498.5	16004.6	#NULL!	17367	#NULL!	#NULL!	#NULL!	512	517	1	2	8	2	8	8	2	8	1	8	2	8	2	8	8	8
A974934902	A9749349	2011	1	1	1	A974	2	66	#NULL!	2	1	3	6	7057.98	4610.14	#NULL!	5242.36	11847.3	6678.15	4345.22	#NULL!	5936.23	#NULL!	#NULL!	11291.1	13368.6	#NULL!	15114	#NULL!	#NULL!	#NULL!	512	517	1	2	8	2	8	8	2	8	1	8	2	8	2	8	8	8
A974935101	A9749351	2011	1	1	1	A974	1	69	#NULL!	4	4	4	5	7057.98	15186.5	#NULL!	#NULL!	20004.8	#NULL!	#NULL!	#NULL!	#NULL!	#NULL!	#NULL!	#NULL!	#NULL!	#NULL!	#NULL!	#NULL!	#NULL!	#NULL!	512	517	1	2	8	2	8	8	2	8	1	8	2	8	2	8	8	8
A974935601	A9749356	2011	1	1	1	A974	2	51	#NULL!	2	3	4	1	7057.98	6120.97	#NULL!	7752.6	18552.9	7395.21	8122.55	#NULL!	16110.3	#NULL!	#NULL!	26001.2	18749.3	#NULL!	38109.9	#NULL!	#NULL!	#NULL!	512	517	1	2	8	2	8	8	2	8	1	8	2	8	2	8	8	8
A974935602	A9749356	2011	1	1	1	A974	1	52	#NULL!	2	3	4	2	7057.98	9902.67	#NULL!	11921.7	31501.4	#NULL!	#NULL!	#NULL!	#NULL!	#NULL!	#NULL!	#NULL!	34397.8	#NULL!	#NULL!	#NULL!	#NULL!	#NULL!	512	517	1	1	1	2	8	8	2	8	1	8	2	8	1	1	1	1
A974935603	A9749356	2011	1	1	1	A974	2	23	#NULL!	2	3	4	2	7057.98	11491.7	#NULL!	#NULL!	34283	19355.5	19441.5	#NULL!	#NULL!	#NULL!	#NULL!	52221.3	#NULL!	#NULL!	#NULL!	#NULL!	#NULL!	#NULL!	512	517	1	1	2	8	8	8	2	8	1	8	1	1	1	2	2	2
A974935604	A9749356	2011	1	1	1	A974	2	19	#NULL!	3	3	3	1	7057.98	10342.2	54746.3	#NULL!	33179.9	13902.2	17281.8	#NULL!	#NULL!	63733.1	#NULL!	52971	#NULL!	117352	#NULL!	135002	#NULL!	#NULL!	512	517	1	1	2	8	8	8	2	8	1	8	1	1	2	8	8	8
A974935605	A9749356	2011	1	1	1	A974	2	13	#NULL!	3	3	1	#NULL!	7057.98	7775.37	#NULL!	#NULL!	#NULL!	10326.2	11618.8	#NULL!	#NULL!	#NULL!	#NULL!	#NULL!	#NULL!	#NULL!	#NULL!	#NULL!	#NULL!	#NULL!	512	517	1	2	8	8	8	8	8	8	1	8	2	8	2	8	8	8
A974935901	A9749359	2011	1	1	1	A974	2	38	#NULL!	3	3	4	1	7057.98	6688.68	16119.2	#NULL!	18562.6	7018.8	8215.41	#NULL!	#NULL!	15916.8	#NULL!	17865.9	#NULL!	35916.9	#NULL!	38031.6	#NULL!	#NULL!	512	517	1	2	8	8	8	8	2	8	1	8	1	3	2	8	8	8
A974936201	A9749362	2011	1	1	1	A974	2	75	#NULL!	3	2	1	7	7057.98	4353.06	#NULL!	#NULL!	12090.2	4325.88	4331.8	#NULL!	#NULL!	#NULL!	#NULL!	10975.1	#NULL!	#NULL!	#NULL!	#NULL!	#NULL!	#NULL!	512	517	1	2	8	1	2	2	1	1	2	3	2	8	2	8	8	8
A974936401	A9749364	2011	1	1	1	A974	2	65	#NULL!	3	2	2	3	7057.98	4610.14	18741.6	5242.36	11847.3	6678.15	4345.22	31843.6	5936.23	20111.9	33732.9	11291.1	13368.6	44903.4	15114	48185.5	70385.7	75779.5	512	517	1	2	8	2	8	8	2	8	1	8	2	8	2	8	8	8
A974936402	A9749364	2011	1	1	1	A974	1	67	#NULL!	3	2	3	5	7057.98	3796.63	#NULL!	7304.15	10002.4	4602.11	4902.54	#NULL!	7961.15	#NULL!	#NULL!	10498.5	16004.6	#NULL!	17367	#NULL!	#NULL!	#NULL!	512	517	1	2	8	2	8	8	2	8	1	8	1	1	1	1	1	1
A974936601	A9749366	2011	1	1	1	A974	1	73	#NULL!	4	4	4	1	7057.98	12265.6	#NULL!	15750.1	22564.3	#NULL!	#NULL!	#NULL!	#NULL!	#NULL!	#NULL!	#NULL!	42300.2	#NULL!	#NULL!	#NULL!	#NULL!	#NULL!	512	517	1	2	8	2	8	8	2	8	1	8	2	8	2	8	8	8
A974936801	A9749368	2011	1	1	1	A974	1	47	#NULL!	1	1	4	1	7057.98	11343.2	37245.7	17022.6	45665.4	12680.1	18729.7	46117.7	20624.2	64262.2	58412.5	54246.7	51846.7	161612	64228.5	175712	121395	151966	512	517	1	2	8	2	8	8	2	8	1	8	1	1	1	2	1	1
A974936802	A9749368	2011	1	1	1	A974	2	46	#NULL!	1	1	4	1	7057.98	7652.91	#NULL!	10360.5	21389.4	7190.94	8859.72	#NULL!	10901.9	#NULL!	#NULL!	19994	24075.5	#NULL!	24565.1	#NULL!	#NULL!	#NULL!	512	517	1	2	8	2	8	8	1	2	1	8	2	8	2	8	8	8
A974936803	A9749368	2011	1	1	1	A974	2	13	#NULL!	1	1	1	#NULL!	7057.98	7775.37	#NULL!	#NULL!	21120.5	8260.97	9295.07	#NULL!	#NULL!	#NULL!	#NULL!	20183.9	#NULL!	#NULL!	#NULL!	#NULL!	#NULL!	#NULL!	512	517	1	2	8	8	8	8	8	8	1	8	2	8	2	8	8	8
A974936804	A9749368	2011	1	1	1	A974	2	10	#NULL!	1	1	1	#NULL!	7057.98	7775.37	#NULL!	#NULL!	21120.5	8260.97	9295.07	#NULL!	#NULL!	#NULL!	#NULL!	20183.9	#NULL!	#NULL!	#NULL!	#NULL!	#NULL!	#NULL!	512	517	1	2	8	8	8	8	8	8	8	8	8	8	2	8	8	8
A974936901	A9749369	2011	1	1	1	A974	1	53	#NULL!	2	3	4	1	7057.98	9902.67	#NULL!	17882.5	31501.4	11487.2	12658.2	#NULL!	21642.2	#NULL!	#NULL!	29967.2	51596.7	#NULL!	55642	#NULL!	#NULL!	#NULL!	512	517	1	2	8	2	8	8	2	8	1	8	2	8	2	8	8	8
A974936902	A9749369	2011	1	1	1	A974	2	52	#NULL!	2	3	4	1	7057.98	6120.97	#NULL!	#NULL!	18552.9	5916.17	6498.04	#NULL!	#NULL!	#NULL!	#NULL!	15600.7	#NULL!	#NULL!	#NULL!	#NULL!	#NULL!	#NULL!	512	517	1	2	8	2	8	8	1	2	1	8	2	8	2	8	8	8
A974936903	A9749369	2011	1	1	1	A974	2	25	#NULL!	2	3	4	1	7057.98	13026.4	52927.3	#NULL!	31850.8	12316.6	12886.5	#NULL!	#NULL!	36650.2	#NULL!	32707.5	#NULL!	87683.8	#NULL!	90795.6	#NULL!	#NULL!	512	517	1	2	8	8	8	8	2	8	1	8	2	8	1	2	1	1
A974936904	A9749369	2011	1	1	1	A974	1	21	#NULL!	2	3	3	1	7057.98	12371.3	#NULL!	#NULL!	51511.1	16357.4	23766.3	#NULL!	#NULL!	#NULL!	#NULL!	63508	#NULL!	#NULL!	#NULL!	#NULL!	#NULL!	#NULL!	512	517	1	2	8	8	8	8	2	8	1	8	2	8	1	2	1	1
A974936905	A9749369	2011	1	1	1	A974	2	18	#NULL!	2	3	3	7	7057.98	10342.2	57054.7	#NULL!	33179.9	11121.8	13825.5	#NULL!	#NULL!	38676.1	#NULL!	36930.5	#NULL!	70411.1	#NULL!	81001	#NULL!	#NULL!	512	517	1	2	8	8	8	8	8	8	1	8	1	1	1	2	2	1
A974936906	A9749369	2011	1	1	1	A974	1	47	#NULL!	2	3	4	5	7057.98	11343.2	#NULL!	24490.4	45665.4	12680.1	18729.7	#NULL!	27179.2	#NULL!	#NULL!	54246.7	65054.8	#NULL!	73762	#NULL!	#NULL!	#NULL!	512	517	1	1	2	1	1	2	2	8	1	8	2	8	1	2	2	1
A974937001	A9749370	2011	1	1	1	A974	2	84	#NULL!	2	1	1	7	7057.98	4353.06	#NULL!	9530.01	12090.2	4325.88	4331.8	#NULL!	9944.3	#NULL!	#NULL!	10975.1	25461.8	#NULL!	25379.7	#NULL!	#NULL!	#NULL!	512	517	1	2	8	1	1	1	1	2	2	3	1	1	1	2	2	2
A974937501	A9749375	2011	1	1	1	A974	1	68	#NULL!	3	2	3	5	7057.98	3796.63	14786	7304.15	20004.8	4602.11	4902.54	23354.3	7961.15	15522.1	24363	20996.9	32009.2	32417.5	34734	36568.5	53553.3	56156.3	512	517	1	2	8	2	8	8	2	8	1	8	1	2	1	1	1	1
A974937502	A9749375	2011	1	1	1	A974	2	65	#NULL!	3	2	2	7	7057.98	4610.14	#NULL!	5242.36	#NULL!	6678.15	4345.22	#NULL!	5936.23	#NULL!	#NULL!	#NULL!	#NULL!	#NULL!	#NULL!	#NULL!	#NULL!	#NULL!	512	517	1	2	8	2	8	8	2	8	1	8	2	8	2	8	8	8
A974938001	A9749380	2011	1	1	1	A974	2	57	#NULL!	1	2	4	7	7057.98	4693.63	#NULL!	6280.59	14878.1	4422.27	5529.63	#NULL!	6324.14	#NULL!	#NULL!	13376.8	16075.1	#NULL!	15916.1	#NULL!	#NULL!	#NULL!	512	517	1	2	8	1	2	2	2	8	1	8	2	8	2	8	8	8
A974938201	A9749382	2011	1	1	1	A974	1	29	#NULL!	2	3	4	2	7057.98	14709.4	27228.7	#NULL!	51942	#NULL!	#NULL!	#NULL!	#NULL!	#NULL!	#NULL!	#NULL!	#NULL!	84085.6	#NULL!	#NULL!	#NULL!	#NULL!	512	517	1	1	2	8	8	8	2	8	1	8	2	8	2	8	8	8
A974938202	A9749382	2011	1	1	1	A974	2	28	#NULL!	2	3	4	2	7057.98	13026.4	#NULL!	#NULL!	#NULL!	19200.9	19329.7	#NULL!	#NULL!	#NULL!	#NULL!	#NULL!	#NULL!	#NULL!	#NULL!	#NULL!	#NULL!	#NULL!	512	517	1	2	8	8	8	8	2	8	1	8	2	8	2	8	8	8
A974938203	A9749382	2011	1	1	1	A974	2	1	13	3	3	1	#NULL!	7057.98	4195.49	#NULL!	#NULL!	#NULL!	8056.61	9642.16	#NULL!	#NULL!	#NULL!	#NULL!	#NULL!	#NULL!	#NULL!	#NULL!	#NULL!	#NULL!	#NULL!	512	517	1	8	8	8	8	8	8	8	8	8	8	8	8	8	8	8
A975927301	A9759273	2011	1	1	2	A975	1	33	#NULL!	3	3	4	2	2640.8	3534.8	#NULL!	#NULL!	15711.4	#NULL!	#NULL!	#NULL!	#NULL!	#NULL!	#NULL!	#NULL!	#NULL!	#NULL!	#NULL!	#NULL!	#NULL!	#NULL!	501	501	1	2	8	8	8	8	2	8	1	8	2	8	2	8	8	8
A975927302	A9759273	2011	1	1	2	A975	2	30	#NULL!	3	3	4	1	2640.8	2783.89	#NULL!	#NULL!	7509.5	5921.73	5681.86	#NULL!	#NULL!	#NULL!	#NULL!	15002.2	#NULL!	#NULL!	#NULL!	#NULL!	#NULL!	#NULL!	501	501	1	2	8	8	8	8	2	8	1	8	1	1	2	8	8	8
A975927303	A9759273	2011	1	1	2	A975	1	3	45	3	3	1	#NULL!	2640.8	1580.11	#NULL!	#NULL!	#NULL!	3124.04	3328.64	#NULL!	#NULL!	#NULL!	#NULL!	#NULL!	#NULL!	#NULL!	#NULL!	#NULL!	#NULL!	#NULL!	501	501	1	8	8	8	8	8	8	8	8	8	8	8	8	8	8	8
A975928001	A9759280	2011	1	1	2	A975	1	48	#NULL!	3	3	4	1	2640.8	3971.14	#NULL!	5959.42	15987	4439.16	6557.07	#NULL!	7220.31	#NULL!	#NULL!	18991.2	18151	#NULL!	22485.7	#NULL!	#NULL!	#NULL!	501	501	1	2	8	2	8	8	2	8	1	8	2	8	2	8	8	8
A975928002	A9759280	2011	1	1	2	A975	2	43	#NULL!	3	3	4	1	2640.8	2903.96	11186	4049.63	9392.39	3064.48	3186.89	15796.5	3897.69	9957	16081	8863.53	11979.1	27893.7	11447.1	29178.6	45921.2	48126.3	501	501	1	2	8	1	2	2	2	8	1	8	2	8	2	8	8	8
A975928003	A9759280	2011	1	1	2	A975	2	16	#NULL!	3	3	2	7	2640.8	3620.7	9583.05	#NULL!	11615.9	3893.62	4840.15	#NULL!	#NULL!	9026.73	#NULL!	12929	#NULL!	16433.5	#NULL!	18905.1	#NULL!	#NULL!	501	501	1	2	8	8	8	8	8	8	1	8	2	8	1	2	1	1
A975928004	A9759280	2011	1	1	2	A975	2	15	#NULL!	3	3	2	7	2640.8	3620.7	#NULL!	#NULL!	11615.9	3893.62	4840.15	#NULL!	#NULL!	#NULL!	#NULL!	12929	#NULL!	#NULL!	#NULL!	#NULL!	#NULL!	#NULL!	501	501	1	2	8	8	8	8	8	8	1	8	2	8	2	8	8	8
A975928201	A9759282	2011	1	1	2	A975	1	56	#NULL!	2	3	3	5	2640.8	3348.3	#NULL!	4773.29	10632	3939.67	5859.94	#NULL!	5518.5	#NULL!	#NULL!	13554.4	11497.5	#NULL!	13536.7	#NULL!	#NULL!	#NULL!	501	501	1	2	8	2	8	8	2	8	1	8	2	8	2	8	8	8
A975928202	A9759282	2011	1	1	2	A975	2	52	#NULL!	3	3	3	7	2640.8	2857.18	19859.2	4071.15	9742.78	2761.58	4549.79	20535.4	4230.04	19660.1	21518.6	10923.3	9845.91	43846.8	10006.4	44678.1	51634.7	52015.6	501	501	1	2	8	2	8	8	2	8	1	8	1	1	1	1	1	1
A975928204	A9759282	2011	1	1	2	A975	2	85	#NULL!	4	3	#NULL!	#NULL!	2640.8	2031.95	#NULL!	#NULL!	#NULL!	#NULL!	#NULL!	#NULL!	#NULL!	#NULL!	#NULL!	#NULL!	#NULL!	#NULL!	#NULL!	#NULL!	#NULL!	#NULL!	501	501	1	2	8	2	8	8	2	8	3	2	1	2	2	8	8	8
A975928801	A9759288	2011	1	1	2	A975	1	38	#NULL!	4	4	4	3	2640.8	4071.02	5346.44	#NULL!	10236.2	4082.01	5969.62	#NULL!	#NULL!	6934.34	#NULL!	12179.3	#NULL!	12930.8	#NULL!	17246.5	#NULL!	#NULL!	501	501	1	2	8	8	8	8	1	1	1	8	1	1	1	2	1	1
A975929901	A9759299	2011	1	1	2	A975	1	65	#NULL!	3	2	1	5	2640.8	1329.16	5176.42	2557.11	3501.73	1611.15	1716.33	8176.09	2787.11	5434.12	8529.24	3675.4	5603.04	11349	6080	12802.2	18748.4	19659.7	501	501	1	2	8	2	8	8	2	8	1	8	1	1	1	1	1	1
A975929902	A9759299	2011	1	1	2	A975	2	61	#NULL!	3	2	2	3	2640.8	1708.86	#NULL!	1844.33	4506.59	1805.44	1653.72	#NULL!	1927.63	#NULL!	#NULL!	3977.39	4305.18	#NULL!	4551.28	#NULL!	#NULL!	#NULL!	501	501	1	2	8	2	8	8	2	8	1	8	1	1	1	1	1	1
A975930602	A9759306	2011	1	1	2	A975	2	60	#NULL!	3	2	3	7	2640.8	2563.29	9235.19	3688.65	9013.17	2708.17	2480.58	8735	3855.26	9407.66	9103.05	5966.08	8610.35	22764.8	9102.55	23091.6	24164.2	24347.1	501	501	1	2	8	2	8	8	1	2	1	8	2	8	1	2	1	1
A975930603	A9759306	2011	1	1	2	A975	1	30	#NULL!	2	2	4	2	2640.8	5302.2	#NULL!	#NULL!	31422.8	5568.86	10742.3	#NULL!	#NULL!	#NULL!	#NULL!	31122.3	#NULL!	#NULL!	#NULL!	#NULL!	#NULL!	#NULL!	501	501	1	2	8	8	8	8	2	8	2	3	1	1	2	8	8	8
A975931301	A9759313	2011	1	1	2	A975	1	34	#NULL!	4	4	3	3	2640.8	3534.8	#NULL!	#NULL!	15711.4	#NULL!	#NULL!	#NULL!	#NULL!	#NULL!	#NULL!	#NULL!	#NULL!	#NULL!	#NULL!	#NULL!	#NULL!	#NULL!	501	501	1	2	8	8	8	8	2	8	1	8	1	1	2	8	8	8
A975931302	A9759313	2011	1	1	2	A975	2	28	#NULL!	4	4	3	1	2640.8	4560.42	7411.71	#NULL!	11150.6	#NULL!	#NULL!	#NULL!	#NULL!	#NULL!	#NULL!	#NULL!	#NULL!	20464.8	#NULL!	#NULL!	#NULL!	#NULL!	501	501	1	2	8	8	8	8	2	8	1	8	1	1	1	2	2	2
A975931303	A9759313	2011	1	1	2	A975	1	2	29	4	4	1	#NULL!	2640.8	1580.11	#NULL!	#NULL!	#NULL!	#NULL!	#NULL!	#NULL!	#NULL!	#NULL!	#NULL!	#NULL!	#NULL!	#NULL!	#NULL!	#NULL!	#NULL!	#NULL!	501	501	1	8	8	8	8	8	8	8	8	8	8	8	8	8	8	8
A975932101	A9759321	2011	1	1	2	A975	1	81	#NULL!	1	1	#NULL!	#NULL!	2640.8	1469.43	#NULL!	#NULL!	3949.77	1443.71	1565.48	#NULL!	#NULL!	#NULL!	#NULL!	3997.52	#NULL!	#NULL!	#NULL!	#NULL!	#NULL!	#NULL!	501	501	1	2	8	2	8	8	2	8	1	8	2	8	2	8	8	8
A975932102	A9759321	2011	1	1	2	A975	2	79	#NULL!	2	1	2	7	2640.8	1523.96	#NULL!	6672.71	4232.64	1514.44	1516.52	#NULL!	6962.79	#NULL!	#NULL!	3842.27	17827.8	#NULL!	17770.3	#NULL!	#NULL!	#NULL!	501	501	1	2	8	2	8	8	2	8	1	8	2	8	2	8	8	8
A975932401	A9759324	2011	1	1	2	A975	1	42	#NULL!	4	4	3	3	2640.8	4570.82	#NULL!	5071.6	12654.2	5039.99	6349.65	#NULL!	6633.47	#NULL!	#NULL!	16984.9	12587.5	#NULL!	17848.1	#NULL!	#NULL!	#NULL!	501	501	1	2	8	2	8	8	2	8	1	8	2	8	1	1	1	1
A975932402	A9759324	2011	1	1	2	A975	2	45	#NULL!	4	4	4	7	2640.8	2679.2	#NULL!	3627.1	7488.21	2517.47	3101.69	#NULL!	3816.64	#NULL!	#NULL!	6999.69	8428.56	#NULL!	8599.99	#NULL!	#NULL!	#NULL!	501	501	1	2	8	2	8	8	1	1	1	8	2	8	2	8	8	8
A975932403	A9759324	2011	1	1	2	A975	1	9	#NULL!	4	4	1	#NULL!	2640.8	1924.55	#NULL!	#NULL!	#NULL!	1760.48	2577.44	#NULL!	#NULL!	#NULL!	#NULL!	#NULL!	#NULL!	#NULL!	#NULL!	#NULL!	#NULL!	#NULL!	501	501	1	2	8	8	8	8	8	8	8	8	8	8	2	8	8	8
A975932404	A9759324	2011	1	1	2	A975	1	8	#NULL!	4	4	1	#NULL!	2640.8	1924.55	#NULL!	#NULL!	#NULL!	1760.48	2577.44	#NULL!	#NULL!	#NULL!	#NULL!	#NULL!	#NULL!	#NULL!	#NULL!	#NULL!	#NULL!	#NULL!	501	501	1	2	8	8	8	8	8	8	8	8	8	8	1	2	2	2
A975933102	A9759331	2011	1	1	2	A975	2	58	#NULL!	1	2	1	7	2640.8	3286.38	7629.71	4397.53	10417.4	1548.19	3871.73	10800.9	4428.03	7540.62	10816.8	9366.17	11255.4	20523.8	11144.1	20725.6	30409.5	30224	501	501	1	2	8	2	8	8	2	8	1	8	2	8	2	8	8	8
A975933701	A9759337	2011	1	1	2	A975	1	38	#NULL!	3	3	4	1	2640.8	4071.02	#NULL!	#NULL!	10236.2	4082.01	5969.62	#NULL!	#NULL!	#NULL!	#NULL!	12179.3	#NULL!	#NULL!	#NULL!	#NULL!	#NULL!	#NULL!	501	501	1	2	8	8	8	8	2	8	1	8	1	1	2	8	8	8
A975933702	A9759337	2011	1	1	2	A975	2	38	#NULL!	2	3	4	7	2640.8	2341.64	#NULL!	#NULL!	6498.56	2457.21	2876.13	#NULL!	#NULL!	#NULL!	#NULL!	6254.65	#NULL!	#NULL!	#NULL!	#NULL!	#NULL!	#NULL!	501	501	1	2	8	8	8	8	2	8	1	8	2	8	1	2	1	1
A975933703	A9759337	2011	1	1	2	A975	2	5	65	3	3	1	#NULL!	2640.8	1826.44	#NULL!	#NULL!	#NULL!	1987.71	2501.6	#NULL!	#NULL!	#NULL!	#NULL!	#NULL!	#NULL!	#NULL!	#NULL!	#NULL!	#NULL!	#NULL!	501	501	1	2	8	8	8	8	8	8	8	8	8	8	8	8	8	8
A975933704	A9759337	2011	1	1	2	A975	2	3	38	3	3	1	#NULL!	2640.8	1468.8	#NULL!	#NULL!	#NULL!	1410.27	2250.41	#NULL!	#NULL!	#NULL!	#NULL!	#NULL!	#NULL!	#NULL!	#NULL!	#NULL!	#NULL!	#NULL!	501	501	1	8	8	8	8	8	8	8	8	8	8	8	8	8	8	8
A975935001	A9759350	2011	1	1	2	A975	1	36	#NULL!	3	3	3	1	2640.8	4071.02	#NULL!	#NULL!	10236.2	4082.01	5969.62	#NULL!	#NULL!	#NULL!	#NULL!	12179.3	#NULL!	#NULL!	#NULL!	#NULL!	#NULL!	#NULL!	501	501	1	2	8	8	8	8	2	8	1	8	2	8	2	8	8	8
A975935002	A9759350	2011	1	1	2	A975	2	34	#NULL!	3	3	3	7	2640.8	2783.89	10637.3	#NULL!	7509.5	2960.86	3787.9	#NULL!	#NULL!	11148.9	#NULL!	7501.12	#NULL!	28417.7	#NULL!	28116.4	#NULL!	#NULL!	501	501	1	2	8	8	8	8	2	8	1	8	1	1	2	8	8	8
A975935003	A9759350	2011	1	1	2	A975	2	2	34	3	3	1	#NULL!	2640.8	1468.8	#NULL!	#NULL!	#NULL!	1410.27	2250.41	#NULL!	#NULL!	#NULL!	#NULL!	#NULL!	#NULL!	#NULL!	#NULL!	#NULL!	#NULL!	#NULL!	501	501	1	8	8	8	8	8	8	8	8	8	8	8	8	8	8	8
A975935201	A9759352	2011	1	1	2	A975	1	44	#NULL!	3	3	4	1	2640.8	4570.82	11050.6	#NULL!	12654.2	5039.99	6349.65	#NULL!	#NULL!	9218.27	#NULL!	16984.9	#NULL!	15589.1	#NULL!	18177.4	#NULL!	#NULL!	501	501	1	2	8	2	8	8	2	8	1	8	2	8	2	8	8	8
A975935202	A9759352	2011	1	1	2	A975	2	39	#NULL!	3	3	4	7	2640.8	2341.64	#NULL!	#NULL!	6498.56	2457.21	2876.13	#NULL!	#NULL!	#NULL!	#NULL!	6254.65	#NULL!	#NULL!	#NULL!	#NULL!	#NULL!	#NULL!	501	501	1	2	8	8	8	8	2	8	1	8	2	8	2	8	8	8
A975935203	A9759352	2011	1	1	2	A975	1	12	#NULL!	3	3	1	#NULL!	2640.8	1916.87	8006.65	#NULL!	7177.3	1967.3	3023.12	#NULL!	#NULL!	5075.29	#NULL!	6741.57	#NULL!	10069.3	#NULL!	10662.7	#NULL!	#NULL!	501	501	1	2	8	8	8	8	8	8	1	8	1	1	2	8	8	8
A975936101	A9759361	2011	1	1	2	A975	2	72	#NULL!	1	1	1	7	2640.8	4333.39	#NULL!	10009.1	4232.64	2081.78	7582.59	#NULL!	10444.2	#NULL!	#NULL!	15369.1	26741.7	#NULL!	26655.5	#NULL!	#NULL!	#NULL!	501	501	1	2	8	2	8	8	1	1	2	3	1	1	2	8	8	8
A975936601	A9759366	2011	1	1	2	A975	1	52	#NULL!	1	1	2	7	2640.8	3466.82	#NULL!	#NULL!	11028.3	4021.54	5908.68	#NULL!	#NULL!	#NULL!	#NULL!	13988.3	#NULL!	#NULL!	#NULL!	#NULL!	#NULL!	#NULL!	501	501	1	2	8	2	8	8	2	8	2	3	1	2	2	8	8	8
A975936602	A9759366	2011	1	1	2	A975	2	45	#NULL!	1	1	3	6	2640.8	2679.2	#NULL!	#NULL!	7488.21	2517.47	4135.59	#NULL!	#NULL!	#NULL!	#NULL!	9332.92	#NULL!	#NULL!	#NULL!	#NULL!	#NULL!	#NULL!	501	501	1	2	8	1	2	2	1	1	1	8	2	8	1	2	1	1
A975936604	A9759366	2011	1	1	2	A975	2	79	#NULL!	2	1	1	7	2640.8	1523.96	#NULL!	#NULL!	4232.64	1514.44	2022.02	#NULL!	#NULL!	#NULL!	#NULL!	5123.03	#NULL!	#NULL!	#NULL!	#NULL!	#NULL!	#NULL!	501	501	1	2	8	2	8	8	2	8	3	3	2	8	2	8	8	8
A975938201	A9759382	2011	1	1	2	A975	2	25	#NULL!	2	3	4	1	2640.8	4560.42	7411.71	#NULL!	11150.6	4311.91	4511.42	#NULL!	#NULL!	8553.89	#NULL!	11450.6	#NULL!	20464.8	#NULL!	21191.1	#NULL!	#NULL!	501	501	1	2	8	8	8	8	2	8	1	8	2	8	2	8	8	8
A975938202	A9759382	2011	1	1	2	A975	2	78	#NULL!	4	3	3	7	2640.8	1523.96	#NULL!	3336.35	4232.64	1514.44	1516.52	#NULL!	3481.39	#NULL!	#NULL!	3842.27	8913.89	#NULL!	8885.16	#NULL!	#NULL!	#NULL!	501	501	1	2	8	1	2	2	2	8	1	8	2	8	2	8	8	8
A976932001	A9769320	2011	1	1	1	A976	1	57	#NULL!	3	4	3	5	10215	13842.1	19974.7	17540.6	19534.8	16286.9	16150.3	26752.7	20279	22060.2	29546.6	37356.6	42250.4	45391.4	49743.7	48778.4	62033.4	66369.9	512	517	1	2	8	2	8	8	2	8	2	3	2	8	2	8	8	8
A976933702	A9769337	2011	1	1	1	A976	2	45	#NULL!	1	2	2	7	10215	9845.35	55377	14994.7	41275.7	11563.8	14247.4	57774	15778.3	33720.9	60497.1	32152.4	34844.3	74589.1	35553	80140.1	138472	147631	512	517	1	2	8	2	8	8	2	8	1	8	2	8	2	8	8	8
A976933703	A9769337	2011	1	1	1	A976	1	19	#NULL!	1	2	3	3	10215	12483	#NULL!	#NULL!	48770	#NULL!	#NULL!	#NULL!	#NULL!	#NULL!	#NULL!	#NULL!	#NULL!	#NULL!	#NULL!	#NULL!	#NULL!	#NULL!	512	517	1	2	8	8	8	8	2	8	1	8	2	8	1	1	1	1
A976933704	A9769337	2011	1	1	1	A976	1	15	#NULL!	1	2	1	7	10215	12483	56851.9	#NULL!	48770	17448.4	19798.1	#NULL!	#NULL!	37901.2	#NULL!	52504.1	#NULL!	67883	#NULL!	83873.9	#NULL!	#NULL!	512	517	1	2	8	8	8	8	8	8	1	8	2	8	2	8	8	8
A976933705	A9769337	2011	1	1	1	A976	2	77	#NULL!	3	2	1	7	10215	5600.15	#NULL!	13792.7	23330.7	6956.47	6965.99	#NULL!	14392.3	#NULL!	#NULL!	17649.1	36850.7	#NULL!	36731.9	#NULL!	#NULL!	#NULL!	512	517	1	2	8	1	2	1	2	8	1	8	1	1	2	8	8	8
A976933901	A9769339	2011	1	1	1	A976	1	52	#NULL!	3	4	3	3	10215	17856.1	#NULL!	11502.8	30394.5	11083.6	19876.7	#NULL!	13921.2	#NULL!	#NULL!	52163.5	33189.2	#NULL!	35791.3	#NULL!	#NULL!	#NULL!	512	517	1	2	8	2	8	8	2	8	1	8	2	8	2	8	8	8
A976934201	A9769342	2011	1	1	1	A976	1	67	#NULL!	3	3	1	5	10215	10989.7	21399.7	#NULL!	#NULL!	6660.61	14190.8	#NULL!	#NULL!	22465.1	#NULL!	#NULL!	#NULL!	#NULL!	#NULL!	#NULL!	#NULL!	#NULL!	512	517	1	2	8	2	8	8	2	8	1	8	2	8	1	2	2	2
A976934501	A9769345	2011	1	1	1	A976	2	73	#NULL!	4	3	1	7	10215	5971.52	107472	18390.3	11665.4	11475	12538.8	163186	19189.8	113577	175129	31768.4	49134.2	221443	48975.8	233981	295462	299360	512	517	1	2	8	2	8	8	2	8	1	8	2	8	2	8	8	8
A976934503	A9769345	2011	1	1	1	A976	2	37	#NULL!	3	3	3	3	10215	9680.49	#NULL!	#NULL!	17910.3	#NULL!	#NULL!	#NULL!	#NULL!	#NULL!	#NULL!	#NULL!	#NULL!	#NULL!	#NULL!	#NULL!	#NULL!	#NULL!	512	517	1	2	8	8	8	8	1	1	1	8	2	8	2	8	8	8
A976935301	A9769353	2011	1	1	1	A976	1	39	#NULL!	1	1	3	3	10215	11219.9	#NULL!	#NULL!	28211.4	11250.2	16452.6	#NULL!	#NULL!	#NULL!	#NULL!	33566.7	#NULL!	#NULL!	#NULL!	#NULL!	#NULL!	#NULL!	512	517	1	2	8	8	8	8	2	8	1	8	2	8	2	8	8	8
A976935302	A9769353	2011	1	1	1	A976	2	34	#NULL!	1	1	3	7	10215	7672.54	#NULL!	#NULL!	20696.5	8160.28	10439.6	#NULL!	#NULL!	#NULL!	#NULL!	20673.4	#NULL!	#NULL!	#NULL!	#NULL!	#NULL!	#NULL!	512	517	1	2	8	8	8	8	2	8	1	8	2	8	2	8	8	8
A976935303	A9769353	2011	1	1	1	A976	2	4	53	1	1	1	#NULL!	10215	4048.07	#NULL!	#NULL!	#NULL!	3886.76	6202.24	#NULL!	#NULL!	#NULL!	#NULL!	#NULL!	#NULL!	#NULL!	#NULL!	#NULL!	#NULL!	#NULL!	512	517	1	2	8	8	8	8	8	8	8	8	8	8	8	8	8	8
A976935401	A9769354	2011	1	1	1	A976	1	43	#NULL!	2	2	3	5	10215	12597.4	15228	13977.6	50154.4	13890.5	17499.9	20816	18282.1	16937.3	25637.3	56810.2	34691.7	57285.7	49190.2	66797	43415.5	54444.2	512	517	1	2	8	2	8	8	2	8	1	8	2	8	2	8	8	8
A976935402	A9769354	2011	1	1	1	A976	2	39	#NULL!	2	2	3	6	10215	6453.66	15552.9	#NULL!	#NULL!	6772.18	7926.74	#NULL!	#NULL!	15357.6	#NULL!	#NULL!	#NULL!	#NULL!	#NULL!	#NULL!	#NULL!	#NULL!	512	517	1	2	8	8	8	8	2	8	1	8	2	8	1	1	1	1
A976935403	A9769354	2011	1	1	1	A976	1	9	#NULL!	2	2	1	#NULL!	10215	5304.16	#NULL!	#NULL!	#NULL!	4851.96	7103.54	#NULL!	#NULL!	#NULL!	#NULL!	#NULL!	#NULL!	#NULL!	#NULL!	#NULL!	#NULL!	#NULL!	512	517	1	2	8	8	8	8	8	8	8	8	8	8	2	8	8	8
A976935404	A9769354	2011	1	1	1	A976	1	7	#NULL!	2	2	1	#NULL!	10215	5304.16	#NULL!	#NULL!	#NULL!	4851.96	7103.54	#NULL!	#NULL!	#NULL!	#NULL!	#NULL!	#NULL!	#NULL!	#NULL!	#NULL!	#NULL!	#NULL!	512	517	1	2	8	8	8	8	8	8	8	8	8	8	2	8	8	8
A976936601	A9769366	2011	1	1	1	A976	1	38	#NULL!	1	2	2	6	10215	11219.9	14735	#NULL!	28211.4	11250.2	16452.6	#NULL!	#NULL!	19111.4	#NULL!	33566.7	#NULL!	35638	#NULL!	47532	#NULL!	#NULL!	512	517	1	2	8	8	8	8	2	8	1	8	1	1	1	1	1	1
A976936602	A9769366	2011	1	1	1	A976	2	42	#NULL!	1	2	3	7	10215	8003.44	15414.5	#NULL!	25885.9	8445.84	8783.22	#NULL!	#NULL!	13721	#NULL!	24428.3	#NULL!	38438.1	#NULL!	40208.8	#NULL!	#NULL!	512	517	1	2	8	2	8	8	2	8	1	8	2	8	1	2	2	2
A976936603	A9769366	2011	1	1	1	A976	1	1	20	1	2	1	#NULL!	10215	4354.86	#NULL!	#NULL!	#NULL!	4305.01	6115.92	#NULL!	#NULL!	#NULL!	#NULL!	#NULL!	#NULL!	#NULL!	#NULL!	#NULL!	#NULL!	#NULL!	512	517	1	8	8	8	8	8	8	8	8	8	8	8	8	8	8	8
A976937101	A9769371	2011	1	1	1	A976	2	50	#NULL!	1	1	3	3	10215	5905.89	#NULL!	7480.19	17901	5708.29	12539.4	#NULL!	7772.12	#NULL!	#NULL!	30105.1	18090.5	#NULL!	18385.4	#NULL!	#NULL!	#NULL!	512	517	1	2	8	1	2	2	2	8	1	8	2	8	2	8	8	8
A976937104	A9769371	2011	1	1	1	A976	1	13	#NULL!	1	1	1	#NULL!	10215	5282.99	33100.1	#NULL!	19781	5421.97	16663.7	#NULL!	#NULL!	37300.6	#NULL!	37160.2	#NULL!	74003.8	#NULL!	78365.2	#NULL!	#NULL!	512	517	1	2	8	8	8	8	8	8	1	8	1	1	2	8	8	8
A976937303	A9769373	2011	1	1	1	A976	2	31	#NULL!	1	2	2	7	10215	11508.8	#NULL!	#NULL!	20696.5	8160.28	13919.5	#NULL!	#NULL!	#NULL!	#NULL!	31010.2	#NULL!	#NULL!	#NULL!	#NULL!	#NULL!	#NULL!	512	517	1	2	8	8	8	8	2	8	1	8	2	8	2	8	8	8
A976937304	A9769373	2011	1	1	1	A976	2	1	14	2	2	1	#NULL!	10215	6072.11	#NULL!	#NULL!	#NULL!	3886.76	8269.66	#NULL!	#NULL!	#NULL!	#NULL!	#NULL!	#NULL!	#NULL!	#NULL!	#NULL!	#NULL!	#NULL!	512	517	1	8	8	8	8	8	8	8	8	8	8	8	8	8	8	8
A976937901	A9769379	2011	1	1	1	A976	1	74	#NULL!	#NULL!	#NULL!	#NULL!	#NULL!	10215	5917.3	#NULL!	#NULL!	10885.8	#NULL!	#NULL!	#NULL!	#NULL!	#NULL!	#NULL!	#NULL!	#NULL!	#NULL!	#NULL!	#NULL!	#NULL!	#NULL!	512	517	1	2	8	2	8	8	2	8	1	8	2	8	2	8	8	8
A976937902	A9769379	2011	1	1	1	A976	2	59	#NULL!	#NULL!	#NULL!	2	1	10215	4528.71	#NULL!	12119.8	14355.4	8533.77	10670.7	#NULL!	12203.9	#NULL!	#NULL!	25813.6	31020.5	#NULL!	30713.8	#NULL!	#NULL!	#NULL!	512	517	1	2	8	2	8	8	2	8	1	8	2	8	2	8	8	8
A976938301	A9769383	2011	1	1	1	A976	2	31	#NULL!	1	1	3	7	10215	7672.54	#NULL!	#NULL!	20696.5	8160.28	10439.6	#NULL!	#NULL!	#NULL!	#NULL!	20673.4	#NULL!	#NULL!	#NULL!	#NULL!	#NULL!	#NULL!	512	517	1	2	8	8	8	8	2	8	1	8	2	8	2	8	8	8
A976938302	A9769383	2011	1	1	1	A976	1	35	#NULL!	1	1	3	5	10215	11219.9	#NULL!	#NULL!	28211.4	11250.2	16452.6	#NULL!	#NULL!	#NULL!	#NULL!	33566.7	#NULL!	#NULL!	#NULL!	#NULL!	#NULL!	#NULL!	512	517	1	2	8	8	8	8	2	8	1	8	2	8	2	8	8	8
A976938303	A9769383	2011	1	1	1	A976	1	2	34	1	1	1	#NULL!	10215	4354.86	#NULL!	#NULL!	#NULL!	4305.01	6115.92	#NULL!	#NULL!	#NULL!	#NULL!	#NULL!	#NULL!	#NULL!	#NULL!	#NULL!	#NULL!	#NULL!	512	517	1	8	8	8	8	8	8	8	8	8	8	8	8	8	8	8
A976938304	A9769383	2011	1	1	1	A976	1	1	12	1	1	1	#NULL!	10215	4354.86	#NULL!	#NULL!	#NULL!	4305.01	6115.92	#NULL!	#NULL!	#NULL!	#NULL!	#NULL!	#NULL!	#NULL!	#NULL!	#NULL!	#NULL!	#NULL!	512	517	1	8	8	8	8	8	8	8	8	8	8	8	8	8	8	8
A977916901	A9779169	2011	1	1	2	A977	1	39	#NULL!	3	3	4	2	3227.02	4726	#NULL!	#NULL!	11883	7108.12	9240.08	#NULL!	#NULL!	#NULL!	#NULL!	28277.5	#NULL!	#NULL!	#NULL!	#NULL!	#NULL!	#NULL!	501	501	1	2	8	8	8	8	2	8	1	8	2	8	1	1	1	1
A977916902	A9779169	2011	1	1	2	A977	2	39	#NULL!	3	3	4	1	3227.02	2718.38	#NULL!	#NULL!	7544.09	4278.81	4451.81	#NULL!	#NULL!	#NULL!	#NULL!	14521.9	#NULL!	#NULL!	#NULL!	#NULL!	#NULL!	#NULL!	501	501	1	2	8	8	8	8	2	8	1	8	2	8	2	8	8	8
A977916903	A9779169	2011	1	1	2	A977	2	10	#NULL!	3	3	1	#NULL!	3227.02	3160.02	#NULL!	#NULL!	#NULL!	5036.07	5036.87	#NULL!	#NULL!	#NULL!	#NULL!	#NULL!	#NULL!	#NULL!	#NULL!	#NULL!	#NULL!	#NULL!	501	501	1	2	8	8	8	8	8	8	8	8	8	8	2	8	8	8
A977916904	A9779169	2011	1	1	2	A977	2	64	#NULL!	4	3	2	7	3227.02	1983.8	#NULL!	2141.06	5231.64	#NULL!	#NULL!	#NULL!	#NULL!	#NULL!	#NULL!	#NULL!	4997.82	#NULL!	#NULL!	#NULL!	#NULL!	#NULL!	501	501	1	2	8	2	8	8	2	8	2	3	2	8	2	8	8	8
A977918301	A9779183	2011	1	1	2	A977	1	56	#NULL!	1	2	4	5	3227.02	2915.25	#NULL!	7388.34	8228.34	3430.14	3401.37	#NULL!	8541.82	#NULL!	#NULL!	7867.57	17796.5	#NULL!	20952.8	#NULL!	#NULL!	#NULL!	501	501	1	2	8	2	8	8	2	8	1	8	2	8	1	1	1	1
A977918302	A9779183	2011	1	1	2	A977	2	52	#NULL!	2	2	3	5	3227.02	2487.65	#NULL!	#NULL!	7540.18	2404.42	2640.9	#NULL!	#NULL!	#NULL!	#NULL!	6340.36	#NULL!	#NULL!	#NULL!	#NULL!	#NULL!	#NULL!	501	501	1	2	8	1	1	2	1	2	1	8	2	8	1	1	1	1
A977918303	A9779183	2011	1	1	2	A977	2	24	#NULL!	2	2	4	7	3227.02	4670.39	9575.22	#NULL!	13933.1	6293.08	6321.05	#NULL!	#NULL!	10895.1	#NULL!	13238.3	#NULL!	26987.3	#NULL!	27445.8	#NULL!	#NULL!	501	501	1	2	8	8	8	8	2	8	1	8	2	8	2	8	8	8
A977918304	A9779183	2011	1	1	2	A977	1	22	#NULL!	2	2	4	7	3227.02	5027.87	11370.1	#NULL!	20934.9	6647.89	10161.8	#NULL!	#NULL!	13364.3	#NULL!	26033.6	#NULL!	24423.5	#NULL!	29461.7	#NULL!	#NULL!	501	501	1	2	8	8	8	8	2	8	1	8	2	8	2	8	8	8
A977918902	A9779189	2011	1	1	2	A977	2	41	#NULL!	4	4	3	1	3227.02	6742.33	#NULL!	9402.33	#NULL!	3557.51	4932.83	#NULL!	9049.55	#NULL!	#NULL!	#NULL!	#NULL!	#NULL!	#NULL!	#NULL!	#NULL!	#NULL!	501	501	1	2	8	2	8	8	1	1	1	8	2	8	2	8	8	8
A977918903	A9779189	2011	1	1	2	A977	2	10	#NULL!	4	4	1	#NULL!	3227.02	6320.04	#NULL!	#NULL!	25751.1	3357.38	5036.87	#NULL!	#NULL!	#NULL!	#NULL!	24609.1	#NULL!	#NULL!	#NULL!	#NULL!	#NULL!	#NULL!	501	501	1	9	9	8	8	8	8	8	8	8	8	8	2	8	8	8
A977918904	A9779189	2011	1	1	2	A977	1	6	76	4	4	1	#NULL!	3227.02	4468.38	#NULL!	#NULL!	#NULL!	2043.72	3989.49	#NULL!	#NULL!	#NULL!	#NULL!	#NULL!	#NULL!	#NULL!	#NULL!	#NULL!	#NULL!	#NULL!	501	501	1	2	8	8	8	8	8	8	8	8	8	8	2	8	8	8
A977919301	A9779193	2011	1	1	2	A977	1	30	#NULL!	1	2	4	5	3227.02	4103.51	#NULL!	#NULL!	18239.1	4309.88	8313.71	#NULL!	#NULL!	#NULL!	#NULL!	24086.3	#NULL!	#NULL!	#NULL!	#NULL!	#NULL!	#NULL!	501	501	1	2	8	8	8	8	2	8	1	8	2	8	1	1	1	1
A977919302	A9779193	2011	1	1	2	A977	2	30	#NULL!	1	2	4	7	3227.02	3231.78	#NULL!	#NULL!	8717.68	3437.23	4397.33	#NULL!	#NULL!	#NULL!	#NULL!	8707.96	#NULL!	#NULL!	#NULL!	#NULL!	#NULL!	#NULL!	501	501	1	9	9	8	8	8	2	8	1	8	2	8	1	1	1	1
A977919303	A9779193	2011	1	1	2	A977	1	3	36	2	2	1	#NULL!	3227.02	1834.33	#NULL!	#NULL!	#NULL!	1813.33	2576.12	#NULL!	#NULL!	#NULL!	#NULL!	#NULL!	#NULL!	#NULL!	#NULL!	#NULL!	#NULL!	#NULL!	501	501	1	8	8	8	8	8	8	8	8	8	8	8	8	8	8	8
A977919702	A9779197	2011	1	1	2	A977	2	33	#NULL!	3	3	4	7	3227.02	6463.57	#NULL!	#NULL!	#NULL!	6874.46	6596	#NULL!	#NULL!	#NULL!	#NULL!	#NULL!	#NULL!	#NULL!	#NULL!	#NULL!	#NULL!	#NULL!	501	501	1	1	2	8	8	8	2	8	1	8	1	3	1	1	1	1
A977919703	A9779197	2011	1	1	2	A977	2	1	23	4	3	1	#NULL!	3227.02	3410.22	#NULL!	#NULL!	#NULL!	3274.32	3918.71	#NULL!	#NULL!	#NULL!	#NULL!	#NULL!	#NULL!	#NULL!	#NULL!	#NULL!	#NULL!	#NULL!	501	501	1	8	8	8	8	8	8	8	8	8	8	8	8	8	8	8
A977920202	A9779202	2011	1	1	2	A977	2	29	#NULL!	4	4	4	7	3227.02	5294.13	#NULL!	#NULL!	25889.2	10011.3	6983	#NULL!	#NULL!	#NULL!	#NULL!	26585.6	#NULL!	#NULL!	#NULL!	#NULL!	#NULL!	#NULL!	501	501	1	2	8	8	8	8	2	8	1	8	2	8	2	8	8	8
A977920203	A9779202	2011	1	1	2	A977	1	3	44	4	4	1	#NULL!	3227.02	1834.33	#NULL!	#NULL!	#NULL!	3626.66	3434.82	#NULL!	#NULL!	#NULL!	#NULL!	#NULL!	#NULL!	#NULL!	#NULL!	#NULL!	#NULL!	#NULL!	501	501	1	8	8	8	8	8	8	8	8	8	8	8	8	8	8	8
A977920204	A9779202	2011	1	1	2	A977	2	1	12	4	4	1	#NULL!	3227.02	1705.11	#NULL!	#NULL!	#NULL!	3274.32	3483.3	#NULL!	#NULL!	#NULL!	#NULL!	#NULL!	#NULL!	#NULL!	#NULL!	#NULL!	#NULL!	#NULL!	501	501	1	8	8	8	8	8	8	8	8	8	8	8	8	8	8	8
A977920601	A9779206	2011	1	1	2	A977	1	70	#NULL!	4	2	3	7	3227.02	3738.68	#NULL!	#NULL!	4585.24	5583.23	2726.02	#NULL!	#NULL!	#NULL!	#NULL!	6961.01	#NULL!	#NULL!	#NULL!	#NULL!	#NULL!	#NULL!	501	501	1	2	8	2	8	8	2	8	2	3	2	8	1	1	2	2
A977920602	A9779206	2011	1	1	2	A977	2	66	#NULL!	3	2	1	7	3227.02	2810.44	11425.3	6391.71	4814.91	4071.14	2648.94	19412.5	7237.71	12260.6	20564.3	6883.27	16299.5	27374.1	18427.7	29374.9	42908.7	46196.8	501	501	1	2	8	2	8	8	2	8	1	8	1	2	2	8	8	8
A977921101	A9779211	2011	1	1	2	A977	1	57	#NULL!	2	3	4	7	3227.02	2915.25	8413.62	7388.34	8228.34	3430.14	3401.37	11268.6	8541.82	9292.1	12445.5	7867.57	17796.5	19119.5	20952.8	20546.2	26129.4	27956	501	501	1	2	8	2	8	8	2	8	1	8	2	8	2	8	8	8
A977921102	A9779211	2011	1	1	2	A977	2	82	#NULL!	4	3	1	7	3227.02	1769.15	#NULL!	#NULL!	4913.62	1758.1	1760.51	#NULL!	#NULL!	#NULL!	#NULL!	4460.44	#NULL!	#NULL!	#NULL!	#NULL!	#NULL!	#NULL!	501	501	1	2	8	1	2	2	1	2	2	3	2	8	1	2	2	2
A977922001	A9779220	2011	1	1	2	A977	1	36	#NULL!	3	3	4	2	3227.02	4726	9309.91	#NULL!	#NULL!	4738.75	6930.06	#NULL!	#NULL!	12075	#NULL!	#NULL!	#NULL!	#NULL!	#NULL!	#NULL!	#NULL!	#NULL!	501	501	1	1	2	8	8	8	2	8	1	8	2	8	1	1	2	1
A977922002	A9779220	2011	1	1	2	A977	2	34	#NULL!	3	3	4	7	3227.02	3231.78	9261.52	#NULL!	8717.68	3437.23	4397.33	#NULL!	#NULL!	9706.95	#NULL!	13061.9	#NULL!	49484.6	#NULL!	48959.9	#NULL!	#NULL!	501	501	1	2	8	8	8	8	2	8	1	8	2	8	2	8	8	8
A977922003	A9779220	2011	1	1	2	A977	1	3	42	3	3	1	#NULL!	3227.02	1834.33	#NULL!	#NULL!	#NULL!	1813.33	2576.12	#NULL!	#NULL!	#NULL!	#NULL!	#NULL!	#NULL!	#NULL!	#NULL!	#NULL!	#NULL!	#NULL!	501	501	1	8	8	8	8	8	8	8	8	8	8	8	8	8	8	8
A977922005	A9779220	2011	1	1	2	A977	2	62	#NULL!	4	3	3	7	3227.02	1983.8	#NULL!	2141.06	5231.64	2095.92	1919.78	#NULL!	2237.76	#NULL!	#NULL!	6925.95	4997.82	#NULL!	5283.52	#NULL!	#NULL!	#NULL!	501	501	1	2	8	2	8	8	1	1	1	8	2	8	1	1	2	1
A977922701	A9779227	2011	1	1	2	A977	1	73	#NULL!	4	3	4	7	3227.02	3738.68	57090.5	3200.53	4585.24	5583.23	2726.02	100893	3339.58	58204.1	109390	6961.01	8595.7	96062	9185.39	108217	97733.5	115596	501	501	1	2	8	2	8	8	2	8	1	8	2	8	2	8	8	8
A977922702	A9779227	2011	1	1	2	A977	2	66	#NULL!	4	3	4	7	3227.02	2810.44	#NULL!	2130.57	4814.91	4071.14	2648.94	#NULL!	2412.57	#NULL!	#NULL!	6883.27	5433.18	#NULL!	6142.56	#NULL!	#NULL!	#NULL!	501	501	1	2	8	1	3	2	2	8	2	3	2	8	1	1	1	1
A977923801	A9779238	2011	1	1	2	A977	1	48	#NULL!	4	4	4	1	3227.02	4610.05	#NULL!	6918.21	18559.1	#NULL!	#NULL!	#NULL!	#NULL!	#NULL!	#NULL!	#NULL!	21071.3	#NULL!	#NULL!	#NULL!	#NULL!	#NULL!	501	501	1	2	8	2	8	8	2	8	1	8	2	8	2	8	8	8
A977923802	A9779238	2011	1	1	2	A977	2	41	#NULL!	4	4	3	7	3227.02	3371.17	#NULL!	4701.16	10903.5	14230.1	14798.5	#NULL!	9049.55	#NULL!	#NULL!	41158.2	13906.4	#NULL!	26577.5	#NULL!	#NULL!	#NULL!	501	501	1	2	8	2	8	8	2	8	1	8	1	2	1	1	2	2
A977923803	A9779238	2011	1	1	2	A977	2	17	#NULL!	4	4	2	7	3227.02	4203.22	5562.42	#NULL!	13484.8	#NULL!	#NULL!	#NULL!	#NULL!	#NULL!	#NULL!	#NULL!	#NULL!	19077.4	#NULL!	#NULL!	#NULL!	#NULL!	501	501	1	2	8	8	8	8	8	8	1	8	2	8	1	1	1	1
A977923804	A9779238	2011	1	1	2	A977	1	14	#NULL!	4	4	1	#NULL!	3227.02	2225.27	4647.41	#NULL!	8332.03	#NULL!	#NULL!	#NULL!	#NULL!	#NULL!	#NULL!	#NULL!	#NULL!	15585.7	#NULL!	#NULL!	#NULL!	#NULL!	501	501	1	2	8	8	8	8	8	8	1	8	2	8	2	8	8	8
A977923901	A9779239	2011	1	1	2	A977	1	42	#NULL!	2	3	4	1	3227.02	5306.21	12828.6	#NULL!	14690.2	5850.87	7371.23	#NULL!	#NULL!	14268.5	#NULL!	19717.6	#NULL!	24129.6	#NULL!	28135.9	#NULL!	#NULL!	501	501	1	2	8	2	8	8	2	8	1	8	2	8	1	1	1	1
A977923902	A9779239	2011	1	1	2	A977	2	36	#NULL!	2	3	4	1	3227.02	2718.38	#NULL!	#NULL!	7544.09	2852.54	3338.86	#NULL!	#NULL!	#NULL!	#NULL!	7260.95	#NULL!	#NULL!	#NULL!	#NULL!	#NULL!	#NULL!	501	501	1	2	8	8	8	8	2	8	2	3	2	8	2	8	8	8
A977923903	A9779239	2011	1	1	2	A977	1	7	#NULL!	2	3	1	#NULL!	3227.02	2234.19	#NULL!	#NULL!	#NULL!	2043.72	2992.12	#NULL!	#NULL!	#NULL!	#NULL!	#NULL!	#NULL!	#NULL!	#NULL!	#NULL!	#NULL!	#NULL!	501	501	1	2	8	8	8	8	8	8	8	8	8	8	2	8	8	8
A977923904	A9779239	2011	1	1	2	A977	1	5	63	2	3	1	#NULL!	3227.02	2234.19	#NULL!	#NULL!	#NULL!	2043.72	2992.12	#NULL!	#NULL!	#NULL!	#NULL!	#NULL!	#NULL!	#NULL!	#NULL!	#NULL!	#NULL!	#NULL!	501	501	1	2	8	8	8	8	8	8	8	8	8	8	8	8	8	8
A977924702	A9779247	2011	1	1	2	A977	2	44	#NULL!	3	3	4	7	3227.02	3371.17	6492.82	4701.16	21807	#NULL!	#NULL!	9168.98	#NULL!	#NULL!	#NULL!	#NULL!	13906.4	32381.4	#NULL!	#NULL!	26654.7	#NULL!	501	501	1	2	8	2	8	8	2	8	1	8	2	8	2	8	8	8
A977925201	A9779252	2011	1	1	2	A977	1	36	#NULL!	3	3	4	5	3227.02	4726	12413.2	#NULL!	11883	4738.75	6930.06	#NULL!	#NULL!	16100	#NULL!	14138.8	#NULL!	30022.5	#NULL!	40042.4	#NULL!	#NULL!	501	501	1	2	8	8	8	8	2	8	1	8	2	8	1	1	2	1
A977925202	A9779252	2011	1	1	2	A977	2	36	#NULL!	3	3	4	7	3227.02	2718.38	#NULL!	#NULL!	7544.09	2852.54	3338.86	#NULL!	#NULL!	#NULL!	#NULL!	7260.95	#NULL!	#NULL!	#NULL!	#NULL!	#NULL!	#NULL!	501	501	1	2	8	8	8	8	2	8	1	8	2	8	2	8	8	8
A977925203	A9779252	2011	1	1	2	A977	2	1	19	4	3	1	#NULL!	3227.02	1705.11	#NULL!	#NULL!	#NULL!	1637.16	2612.47	#NULL!	#NULL!	#NULL!	#NULL!	#NULL!	#NULL!	#NULL!	#NULL!	#NULL!	#NULL!	#NULL!	501	501	1	8	8	8	8	8	8	8	8	8	8	8	8	8	8	8
A977938302	A9779383	2011	1	1	2	A977	2	58	#NULL!	2	2	1	7	3227.02	2861.34	6642.92	#NULL!	12093.4	2695.91	3370.98	#NULL!	#NULL!	6565.36	#NULL!	8154.8	#NULL!	17869.4	#NULL!	18045	#NULL!	#NULL!	501	501	1	1	9	2	8	8	2	8	2	3	2	8	1	2	2	1
A977938303	A9779383	2011	1	1	2	A977	1	27	#NULL!	2	2	4	2	3227.02	8967.19	8299.61	#NULL!	36876.7	12042.4	15553.5	#NULL!	#NULL!	9717.4	#NULL!	31552.5	#NULL!	25630.2	#NULL!	26889	#NULL!	#NULL!	501	501	1	2	8	8	8	8	2	8	1	8	2	8	2	8	8	8
A978918701	A9789187	2011	1	1	2	A978	1	57	#NULL!	3	4	4	1	2717.49	2915.25	12620.4	3694.17	8228.34	#NULL!	#NULL!	11268.6	#NULL!	#NULL!	#NULL!	#NULL!	8898.23	28679.3	#NULL!	#NULL!	26129.4	#NULL!	501	501	1	1	2	2	8	8	2	8	1	8	2	8	2	8	8	8
A978918702	A9789187	2011	1	1	2	A978	2	58	#NULL!	4	4	3	7	2717.49	1907.56	#NULL!	2552.52	6046.69	2695.91	3370.98	#NULL!	5140.44	#NULL!	#NULL!	8154.8	6533.15	#NULL!	12937.1	#NULL!	#NULL!	#NULL!	501	501	1	2	8	1	2	1	1	2	2	3	1	1	2	8	8	8
A978918703	A9789187	2011	1	1	2	A978	2	29	#NULL!	4	4	4	3	2717.49	5294.13	#NULL!	#NULL!	12944.6	7508.47	7855.88	#NULL!	#NULL!	#NULL!	#NULL!	19939.2	#NULL!	#NULL!	#NULL!	#NULL!	#NULL!	#NULL!	501	501	1	2	8	8	8	8	2	8	1	8	2	8	2	8	8	8
A978919101	A9789191	2011	1	1	2	A978	1	53	#NULL!	2	3	4	1	2717.49	4024.59	#NULL!	4845.14	12802.6	4668.56	5144.48	#NULL!	5863.81	#NULL!	#NULL!	12179.1	13979.8	#NULL!	15075.8	#NULL!	#NULL!	#NULL!	501	501	1	1	2	2	8	8	2	8	2	3	2	8	1	2	1	1
A978919102	A9789191	2011	1	1	2	A978	2	51	#NULL!	2	3	4	7	2717.49	2487.65	#NULL!	3150.77	7540.18	2404.42	2640.9	#NULL!	3273.73	#NULL!	#NULL!	6340.36	7619.99	#NULL!	7744.21	#NULL!	#NULL!	#NULL!	501	501	1	2	8	2	8	8	2	8	1	8	2	8	2	8	8	8
A978919103	A9789191	2011	1	1	2	A978	1	20	#NULL!	2	3	3	7	2717.49	5027.87	22740.2	#NULL!	20934.9	6647.89	10161.8	#NULL!	#NULL!	16705.3	#NULL!	26033.6	#NULL!	30529.4	#NULL!	36827.1	#NULL!	#NULL!	501	501	1	1	2	8	8	8	1	1	1	8	2	8	1	1	2	1
A978919104	A9789191	2011	1	1	2	A978	2	21	#NULL!	2	3	3	7	2717.49	4670.39	#NULL!	#NULL!	13933.1	6293.08	6321.05	#NULL!	#NULL!	#NULL!	#NULL!	13238.3	#NULL!	#NULL!	#NULL!	#NULL!	#NULL!	#NULL!	501	501	1	1	2	8	8	8	2	8	1	8	2	8	2	8	8	8
A978919105	A9789191	2011	1	1	2	A978	1	13	#NULL!	3	3	1	#NULL!	2717.49	2225.27	18589.6	#NULL!	8332.03	2283.81	3509.5	#NULL!	#NULL!	9819.73	#NULL!	7826.21	#NULL!	19482.2	#NULL!	20630.4	#NULL!	#NULL!	501	501	1	2	8	8	8	8	8	8	1	8	2	8	2	8	8	8
A978919601	A9789196	2011	1	1	2	A978	1	33	#NULL!	3	4	4	1	2717.49	4103.51	23013.6	#NULL!	18239.1	4309.88	8313.71	#NULL!	#NULL!	29807.9	#NULL!	24086.3	#NULL!	69955.3	#NULL!	99776.3	#NULL!	#NULL!	501	501	1	9	9	8	8	8	2	8	1	8	2	8	2	8	8	8
A978919602	A9789196	2011	1	1	2	A978	2	31	#NULL!	4	4	4	7	2717.49	3231.78	#NULL!	#NULL!	8717.68	3437.23	4397.33	#NULL!	#NULL!	#NULL!	#NULL!	8707.96	#NULL!	#NULL!	#NULL!	#NULL!	#NULL!	#NULL!	501	501	1	2	8	8	8	8	2	8	1	8	2	8	2	8	8	8
A978919603	A9789196	2011	1	1	2	A978	2	3	46	4	4	1	#NULL!	2717.49	1705.11	#NULL!	#NULL!	#NULL!	1637.16	2612.47	#NULL!	#NULL!	#NULL!	#NULL!	#NULL!	#NULL!	#NULL!	#NULL!	#NULL!	#NULL!	#NULL!	501	501	1	8	8	8	8	8	8	8	8	8	8	8	8	8	8	8
A978919604	A9789196	2011	1	1	2	A978	1	1	15	4	4	1	#NULL!	2717.49	1834.33	#NULL!	#NULL!	#NULL!	1813.33	2576.12	#NULL!	#NULL!	#NULL!	#NULL!	#NULL!	#NULL!	#NULL!	#NULL!	#NULL!	#NULL!	#NULL!	501	501	1	8	8	8	8	8	8	8	8	8	8	8	8	8	8	8
A978919605	A9789196	2011	1	1	2	A978	2	38	#NULL!	4	4	4	1	2717.49	2718.38	#NULL!	#NULL!	7544.09	2852.54	3338.86	#NULL!	#NULL!	#NULL!	#NULL!	7260.95	#NULL!	#NULL!	#NULL!	#NULL!	#NULL!	#NULL!	501	501	1	2	8	8	8	8	2	8	1	8	2	8	2	8	8	8
A978920001	A9789200	2011	1	1	2	A978	1	62	#NULL!	4	4	4	1	2717.49	2017.03	#NULL!	2619.2	5800.06	2306.47	2146.91	#NULL!	2935.63	#NULL!	#NULL!	8429.18	6752.58	#NULL!	7404.68	#NULL!	#NULL!	#NULL!	501	501	1	2	8	2	8	8	2	8	1	8	2	8	2	8	8	8
A978920002	A9789200	2011	1	1	2	A978	2	61	#NULL!	4	4	4	7	2717.49	1983.8	#NULL!	2141.06	5231.64	2095.92	1919.78	#NULL!	2237.76	#NULL!	#NULL!	6925.95	4997.82	#NULL!	5283.52	#NULL!	#NULL!	#NULL!	501	501	1	2	8	2	8	8	2	8	1	8	2	8	2	8	8	8
A978920401	A9789204	2011	1	1	2	A978	1	63	#NULL!	4	4	3	1	2717.49	2017.03	#NULL!	2619.2	5800.06	2306.47	2146.91	#NULL!	2935.63	#NULL!	#NULL!	5619.45	6752.58	#NULL!	7404.68	#NULL!	#NULL!	#NULL!	501	501	1	2	8	2	8	8	2	8	1	8	2	8	2	8	8	8
A978920402	A9789204	2011	1	1	2	A978	2	59	#NULL!	4	4	3	7	2717.49	1907.56	#NULL!	2552.52	6046.69	1797.28	2247.32	#NULL!	2570.22	#NULL!	#NULL!	5436.53	6533.15	#NULL!	6468.54	#NULL!	#NULL!	#NULL!	501	501	1	2	8	2	8	8	2	8	1	8	2	8	2	8	8	8
A978920601	A9789206	2011	1	1	2	A978	1	43	#NULL!	4	4	4	2	2717.49	5306.21	12828.6	5887.55	14690.2	5850.87	7371.23	17536	7700.71	28537	21597.6	19717.6	14612.7	48259.2	20719.6	56271.8	36574.5	45865.4	501	501	1	1	2	2	8	8	2	8	1	8	2	8	1	1	1	1
A978920602	A9789206	2011	1	1	2	A978	2	40	#NULL!	4	4	4	7	2717.49	3371.17	#NULL!	4701.16	10903.5	3557.51	3699.62	#NULL!	4524.77	#NULL!	#NULL!	10289.6	13906.4	#NULL!	13288.7	#NULL!	#NULL!	#NULL!	501	501	1	2	8	1	2	2	2	8	1	8	2	8	2	8	8	8
A978920603	A9789206	2011	1	1	2	A978	1	14	#NULL!	4	4	1	#NULL!	2717.49	2225.27	#NULL!	#NULL!	8332.03	2283.81	3509.5	#NULL!	#NULL!	#NULL!	#NULL!	7826.21	#NULL!	#NULL!	#NULL!	#NULL!	#NULL!	#NULL!	501	501	1	2	8	8	8	8	8	8	1	8	2	8	2	8	8	8
A978920604	A9789206	2011	1	1	2	A978	2	11	#NULL!	4	4	1	#NULL!	2717.49	3160.02	#NULL!	#NULL!	8583.68	3357.38	3777.65	#NULL!	#NULL!	#NULL!	#NULL!	8203.05	#NULL!	#NULL!	#NULL!	#NULL!	#NULL!	#NULL!	501	501	1	2	8	8	8	8	8	8	8	8	8	8	2	8	8	8
A978920702	A9789207	2011	1	1	2	A978	2	50	#NULL!	4	4	4	2	2717.49	7462.95	#NULL!	6301.53	7540.18	3205.89	5281.79	#NULL!	6547.46	#NULL!	#NULL!	12680.7	15240	#NULL!	15488.4	#NULL!	#NULL!	#NULL!	501	501	1	2	8	2	8	8	2	8	1	8	2	8	2	8	8	8
A978920704	A9789207	2011	1	1	2	A978	1	16	#NULL!	4	4	2	7	2717.49	11830.6	6785.07	#NULL!	12032.3	5879.6	12719.6	#NULL!	#NULL!	25543.3	#NULL!	26730.8	#NULL!	45749.3	#NULL!	56526.3	#NULL!	#NULL!	501	501	1	2	8	8	8	8	8	8	1	8	2	8	2	8	8	8
A978921101	A9789211	2011	1	1	2	A978	1	58	#NULL!	3	4	4	2	2717.49	2915.25	#NULL!	#NULL!	16456.7	4573.52	4535.16	#NULL!	#NULL!	#NULL!	#NULL!	15735.1	#NULL!	#NULL!	#NULL!	#NULL!	#NULL!	#NULL!	501	501	1	2	8	2	8	8	2	8	2	3	2	8	2	8	8	8
A978921103	A9789211	2011	1	1	2	A978	2	29	#NULL!	4	4	4	7	2717.49	5294.13	#NULL!	#NULL!	25889.2	6674.2	6983	#NULL!	#NULL!	#NULL!	#NULL!	26585.6	#NULL!	#NULL!	#NULL!	#NULL!	#NULL!	#NULL!	501	501	1	1	2	8	8	8	2	8	1	8	2	8	2	8	8	8
A978921104	A9789211	2011	1	1	2	A978	2	25	#NULL!	4	4	4	1	2717.49	5294.13	#NULL!	#NULL!	25889.2	#NULL!	#NULL!	#NULL!	#NULL!	#NULL!	#NULL!	#NULL!	#NULL!	#NULL!	#NULL!	#NULL!	#NULL!	#NULL!	501	501	1	2	8	8	8	8	2	8	1	8	2	8	2	8	8	8
A978921901	A9789219	2011	1	1	2	A978	1	54	#NULL!	2	3	4	1	2717.49	4024.59	9051.14	4845.14	12802.6	4668.56	5144.48	16158	5863.81	9786.13	18730.8	12179.1	13979.8	21600.7	15075.8	21430	40848	42347.2	501	501	1	2	8	2	8	8	1	2	1	8	2	8	2	8	8	8
A978921902	A9789219	2011	1	1	2	A978	2	51	#NULL!	2	3	4	7	2717.49	2487.65	#NULL!	3150.77	7540.18	2404.42	2640.9	#NULL!	3273.73	#NULL!	#NULL!	6340.36	7619.99	#NULL!	7744.21	#NULL!	#NULL!	#NULL!	501	501	1	2	8	2	8	8	2	8	1	8	2	8	2	8	8	8
A978921903	A9789219	2011	1	1	2	A978	2	23	#NULL!	2	3	4	7	2717.49	4670.39	7181.42	#NULL!	13933.1	6293.08	6321.05	#NULL!	#NULL!	8171.33	#NULL!	13238.3	#NULL!	20240.5	#NULL!	20584.4	#NULL!	#NULL!	501	501	1	1	2	8	8	8	2	8	1	8	2	8	2	8	8	8
A978922201	A9789222	2011	1	1	2	A978	2	63	#NULL!	4	4	4	7	2717.49	5951.39	10721	2141.06	5231.64	6287.75	7679.13	5070.17	2237.76	10921.2	5283.81	13851.9	4997.82	26427.4	5283.52	26806.7	14026	14132.1	501	501	1	2	8	2	8	8	2	8	2	3	2	8	2	8	8	8
A978922701	A9789227	2011	1	1	2	A978	1	52	#NULL!	3	4	4	3	2717.49	4024.59	#NULL!	4845.14	12802.6	4668.56	5144.48	#NULL!	5863.81	#NULL!	#NULL!	12179.1	13979.8	#NULL!	15075.8	#NULL!	#NULL!	#NULL!	501	501	1	2	8	2	8	8	2	8	1	8	2	8	2	8	8	8
A978922702	A9789227	2011	1	1	2	A978	2	52	#NULL!	3	4	4	7	2717.49	2487.65	23054.3	3150.77	7540.18	2404.42	2640.9	15892.9	3273.73	22823.2	16653.8	6340.36	7619.99	50901.3	7744.21	51866.2	39961.4	40256.2	501	501	1	2	8	2	8	8	2	8	1	8	2	8	2	8	8	8
A978922704	A9789227	2011	1	1	2	A978	2	20	#NULL!	3	4	3	7	2717.49	4670.39	#NULL!	#NULL!	13933.1	6293.08	6321.05	#NULL!	#NULL!	#NULL!	#NULL!	13238.3	#NULL!	#NULL!	#NULL!	#NULL!	#NULL!	#NULL!	501	501	1	2	8	8	8	8	2	8	1	8	2	8	2	8	8	8
A978922801	A9789228	2011	1	1	2	A978	1	39	#NULL!	4	4	4	1	2717.49	4726	#NULL!	#NULL!	11883	4738.75	6930.06	#NULL!	#NULL!	#NULL!	#NULL!	14138.8	#NULL!	#NULL!	#NULL!	#NULL!	#NULL!	#NULL!	501	501	1	2	8	8	8	8	2	8	1	8	2	8	2	8	8	8
A978922802	A9789228	2011	1	1	2	A978	2	35	#NULL!	4	4	4	1	2717.49	2718.38	13102.2	#NULL!	7544.09	2852.54	3338.86	#NULL!	#NULL!	12937.7	#NULL!	7260.95	#NULL!	29194.3	#NULL!	30913.2	#NULL!	#NULL!	501	501	1	2	8	8	8	8	2	8	1	8	2	8	2	8	8	8
A978922803	A9789228	2011	1	1	2	A978	2	8	#NULL!	4	4	1	#NULL!	2717.49	2120.29	#NULL!	#NULL!	#NULL!	2307.51	2904.08	#NULL!	#NULL!	#NULL!	#NULL!	#NULL!	#NULL!	#NULL!	#NULL!	#NULL!	#NULL!	#NULL!	501	501	1	2	8	8	8	8	8	8	8	8	8	8	2	8	8	8
A978922804	A9789228	2011	1	1	2	A978	2	5	69	4	4	1	#NULL!	2717.49	2120.29	#NULL!	#NULL!	#NULL!	2307.51	2904.08	#NULL!	#NULL!	#NULL!	#NULL!	#NULL!	#NULL!	#NULL!	#NULL!	#NULL!	#NULL!	#NULL!	501	501	1	1	2	8	8	8	8	8	8	8	8	8	8	8	8	8
A978923001	A9789230	2011	1	1	2	A978	1	61	#NULL!	3	3	4	7	2717.49	2017.03	5279.2	#NULL!	5800.06	#NULL!	#NULL!	#NULL!	#NULL!	#NULL!	#NULL!	#NULL!	#NULL!	14197.5	#NULL!	#NULL!	#NULL!	#NULL!	501	501	1	2	8	2	8	8	2	8	1	8	2	8	2	8	8	8
A978923002	A9789230	2011	1	1	2	A978	2	55	#NULL!	2	3	4	7	2717.49	1907.56	#NULL!	5105.04	6046.69	2695.91	3370.98	#NULL!	5140.44	#NULL!	#NULL!	8154.8	13066.3	#NULL!	12937.1	#NULL!	#NULL!	#NULL!	501	501	1	2	8	1	2	2	1	2	1	8	2	8	2	8	8	8
A978923003	A9789230	2011	1	1	2	A978	2	23	#NULL!	2	3	3	7	2717.49	4670.39	7181.42	#NULL!	13933.1	9439.61	9481.58	#NULL!	#NULL!	16342.7	#NULL!	19857.5	#NULL!	20240.5	#NULL!	41168.7	#NULL!	#NULL!	501	501	1	2	8	8	8	8	2	8	1	8	2	8	2	8	8	8
A978923202	A9789232	2011	1	1	2	A978	2	39	#NULL!	4	4	4	7	2717.49	2718.38	#NULL!	#NULL!	7544.09	2852.54	3338.86	#NULL!	#NULL!	#NULL!	#NULL!	7260.95	#NULL!	#NULL!	#NULL!	#NULL!	#NULL!	#NULL!	501	501	1	2	8	8	8	8	2	8	1	8	1	1	2	8	8	8
A978923203	A9789232	2011	1	1	2	A978	2	12	#NULL!	4	4	1	#NULL!	2717.49	3160.02	#NULL!	#NULL!	8583.68	3357.38	3777.65	#NULL!	#NULL!	#NULL!	#NULL!	8203.05	#NULL!	#NULL!	#NULL!	#NULL!	#NULL!	#NULL!	501	501	1	2	8	8	8	8	8	8	2	3	2	8	1	2	1	1
A978923204	A9789232	2011	1	1	2	A978	1	4	48	4	4	1	#NULL!	2717.49	1834.33	#NULL!	#NULL!	#NULL!	1813.33	2576.12	#NULL!	#NULL!	#NULL!	#NULL!	#NULL!	#NULL!	#NULL!	#NULL!	#NULL!	#NULL!	#NULL!	501	501	1	2	8	8	8	8	8	8	8	8	8	8	8	8	8	8
A978923801	A9789238	2011	1	1	2	A978	1	47	#NULL!	4	4	3	3	2717.49	4610.05	#NULL!	6918.21	18559.1	#NULL!	#NULL!	#NULL!	#NULL!	#NULL!	#NULL!	#NULL!	21071.3	#NULL!	#NULL!	#NULL!	#NULL!	#NULL!	501	501	1	2	8	2	8	8	2	8	1	8	1	1	2	8	8	8
A978923802	A9789238	2011	1	1	2	A978	2	46	#NULL!	4	4	3	7	2717.49	3110.25	17494.2	4210.65	8692.97	8767.51	7201.44	16223.5	8861.38	17044.5	16988.2	24377.5	9784.61	37701.6	19967.2	40507.4	38884.4	41456.3	501	501	1	2	8	2	8	8	2	8	1	8	2	8	2	8	8	8
A978923803	A9789238	2011	1	1	2	A978	1	19	#NULL!	4	4	3	7	2717.49	3943.53	#NULL!	#NULL!	12032.3	#NULL!	#NULL!	#NULL!	#NULL!	#NULL!	#NULL!	#NULL!	#NULL!	#NULL!	#NULL!	#NULL!	#NULL!	#NULL!	501	501	1	1	2	8	8	8	2	8	1	8	2	8	1	2	1	1
A978923804	A9789238	2011	1	1	2	A978	1	6	74	4	4	1	#NULL!	2717.49	2234.19	#NULL!	#NULL!	#NULL!	6131.15	5984.23	#NULL!	#NULL!	#NULL!	#NULL!	#NULL!	#NULL!	#NULL!	#NULL!	#NULL!	#NULL!	#NULL!	501	501	1	2	8	8	8	8	8	8	8	8	8	8	2	8	8	8
A978924201	A9789242	2011	1	1	2	A978	1	54	#NULL!	4	4	4	1	2717.49	4024.59	#NULL!	9690.29	12802.6	4668.56	5144.48	#NULL!	11727.6	#NULL!	#NULL!	12179.1	27959.5	#NULL!	30151.6	#NULL!	#NULL!	#NULL!	501	501	1	2	8	2	8	8	2	8	1	8	2	8	2	8	8	8
A978924202	A9789242	2011	1	1	2	A978	2	51	#NULL!	4	4	4	7	2717.49	2487.65	#NULL!	#NULL!	7540.18	2404.42	2640.9	#NULL!	#NULL!	#NULL!	#NULL!	6340.36	#NULL!	#NULL!	#NULL!	#NULL!	#NULL!	#NULL!	501	501	1	2	8	2	8	8	2	8	1	8	2	8	2	8	8	8
A978924203	A9789242	2011	1	1	2	A978	1	26	#NULL!	4	4	4	2	2717.49	5978.12	16599.2	#NULL!	18438.4	8028.25	10369	#NULL!	#NULL!	19434.8	#NULL!	21035	#NULL!	51260.4	#NULL!	53778	#NULL!	#NULL!	501	501	1	2	8	8	8	8	2	8	1	8	2	8	2	8	8	8
A978924902	A9789249	2011	1	1	2	A978	2	54	#NULL!	4	4	3	7	2717.49	2487.65	#NULL!	3150.77	7540.18	3606.62	3961.34	#NULL!	3273.73	#NULL!	#NULL!	9510.55	7619.99	#NULL!	7744.21	#NULL!	#NULL!	#NULL!	501	501	1	2	8	2	8	8	2	8	1	8	2	8	2	8	8	8
A978924903	A9789249	2011	1	1	2	A978	2	28	#NULL!	4	4	4	2	2717.49	5294.13	#NULL!	#NULL!	#NULL!	#NULL!	#NULL!	#NULL!	#NULL!	#NULL!	#NULL!	#NULL!	#NULL!	#NULL!	#NULL!	#NULL!	#NULL!	#NULL!	501	501	1	2	8	8	8	8	2	8	1	8	2	8	2	8	8	8
A978925302	A9789253	2011	1	1	2	A978	2	41	#NULL!	3	3	4	7	2717.49	3371.17	#NULL!	9402.33	14538	5336.27	4932.83	#NULL!	9049.55	#NULL!	#NULL!	13719.4	27812.8	#NULL!	26577.5	#NULL!	#NULL!	#NULL!	501	501	1	2	8	2	8	8	2	8	1	8	2	8	2	8	8	8
A978925303	A9789253	2011	1	1	2	A978	2	13	#NULL!	3	3	1	#NULL!	2717.49	3160.02	10569.4	#NULL!	11444.9	5036.07	5036.87	#NULL!	#NULL!	16498.4	#NULL!	10937.4	#NULL!	53300.8	#NULL!	56584.3	#NULL!	#NULL!	501	501	1	2	8	8	8	8	8	8	1	8	2	8	2	8	8	8
A978925304	A9789253	2011	1	1	2	A978	1	11	#NULL!	3	3	1	#NULL!	2717.49	2225.27	#NULL!	#NULL!	11109.4	3425.72	4679.33	#NULL!	#NULL!	#NULL!	#NULL!	10434.9	#NULL!	#NULL!	#NULL!	#NULL!	#NULL!	#NULL!	501	501	1	2	8	8	8	8	8	8	8	8	8	8	2	8	8	8
A978938302	A9789383	2011	1	1	2	A978	2	39	#NULL!	4	4	4	7	2717.49	5436.75	13102.2	#NULL!	11316.1	5705.08	4451.81	#NULL!	#NULL!	19406.5	#NULL!	10891.4	#NULL!	43791.4	#NULL!	46369.8	#NULL!	#NULL!	501	501	1	2	8	8	8	8	2	8	1	8	2	8	2	8	8	8
A978938303	A9789383	2011	1	1	2	A978	1	11	#NULL!	4	4	1	#NULL!	2717.49	4450.54	#NULL!	#NULL!	12498.1	4567.63	4679.33	#NULL!	#NULL!	#NULL!	#NULL!	11739.3	#NULL!	#NULL!	#NULL!	#NULL!	#NULL!	#NULL!	501	501	1	2	8	8	8	8	8	8	8	8	8	8	1	2	1	1
A978938304	A9789383	2011	1	1	2	A978	1	8	#NULL!	4	4	1	#NULL!	2717.49	4468.38	#NULL!	#NULL!	#NULL!	4087.43	3989.49	#NULL!	#NULL!	#NULL!	#NULL!	#NULL!	#NULL!	#NULL!	#NULL!	#NULL!	#NULL!	#NULL!	501	501	1	2	8	8	8	8	8	8	8	8	8	8	2	8	8	8
A979919301	A9799193	2011	1	1	1	A979	1	39	#NULL!	4	4	4	1	8046.09	11628.5	15271.6	#NULL!	29238.7	11659.9	17051.7	#NULL!	#NULL!	19807.3	#NULL!	34789.1	#NULL!	36935.8	#NULL!	49263	#NULL!	#NULL!	512	517	1	2	8	8	8	8	2	8	1	8	2	8	1	2	2	2
A979919901	A9799199	2011	1	1	1	A979	1	30	#NULL!	4	4	4	1	8046.09	10096.9	#NULL!	#NULL!	44878.2	10604.6	20456.2	#NULL!	#NULL!	#NULL!	#NULL!	59265.4	#NULL!	#NULL!	#NULL!	#NULL!	#NULL!	#NULL!	512	517	1	2	8	8	8	8	2	8	1	8	2	8	2	8	8	8
A979920101	A9799201	2011	1	1	1	A979	2	23	#NULL!	1	2	4	1	8046.09	11491.7	11780.1	#NULL!	34283	15484.4	15553.2	#NULL!	#NULL!	13403.9	#NULL!	32573.5	#NULL!	33201.8	#NULL!	33765.8	#NULL!	#NULL!	512	517	1	2	8	8	8	8	2	8	1	8	2	8	1	1	1	1
A979920301	A9799203	2011	1	1	1	A979	1	28	#NULL!	3	3	4	1	8046.09	14709.4	13614.4	#NULL!	45368.4	19549.1	22424	#NULL!	#NULL!	15940.1	#NULL!	51757.4	#NULL!	42042.8	#NULL!	44107.7	#NULL!	#NULL!	512	517	1	2	8	8	8	8	2	8	1	8	2	8	2	8	8	8
A979920701	A9799207	2011	1	1	1	A979	2	65	#NULL!	4	3	2	7	8046.09	4610.14	#NULL!	#NULL!	11847.3	6678.15	4345.22	#NULL!	#NULL!	#NULL!	#NULL!	11291.1	#NULL!	#NULL!	#NULL!	#NULL!	#NULL!	#NULL!	512	517	1	2	8	2	8	8	2	8	1	8	2	8	2	8	8	8
A979920801	A9799208	2011	1	1	1	A979	2	35	#NULL!	3	3	4	2	8046.09	6688.68	16119.2	#NULL!	18562.6	7018.8	8215.41	#NULL!	#NULL!	15916.8	#NULL!	17865.9	#NULL!	35916.9	#NULL!	38031.6	#NULL!	#NULL!	512	517	1	1	1	8	8	8	2	8	1	8	2	8	1	1	2	1
A979921001	A9799210	2011	1	1	1	A979	2	24	#NULL!	1	2	4	1	8046.09	11491.7	#NULL!	#NULL!	34283	15484.4	15553.2	#NULL!	#NULL!	#NULL!	#NULL!	32573.5	#NULL!	#NULL!	#NULL!	#NULL!	#NULL!	#NULL!	512	517	1	2	8	8	8	8	2	8	1	8	2	8	2	8	8	8
A979921202	A9799212	2011	1	1	1	A979	2	26	#NULL!	3	3	4	1	8046.09	13026.4	10585.5	#NULL!	31850.8	12316.6	12886.5	#NULL!	#NULL!	12216.7	#NULL!	32707.5	#NULL!	29227.9	#NULL!	30265.2	#NULL!	#NULL!	512	517	1	2	8	8	8	8	2	8	1	8	2	8	2	8	8	8
A979923101	A9799231	2011	1	1	1	A979	1	42	#NULL!	2	3	4	1	8046.09	13056.2	15782.6	14486.6	36145.7	14396.3	18137.2	21574.1	18947.9	17554.1	26571	48515.9	35955.1	29685.9	50981.6	34614.8	44996.6	56426.9	512	517	1	2	8	2	8	8	2	8	1	8	2	8	1	2	2	2
A979923401	A9799234	2011	1	1	1	A979	2	61	#NULL!	4	3	1	6	8046.09	4881.22	#NULL!	#NULL!	12872.7	5157.09	4723.71	#NULL!	#NULL!	#NULL!	#NULL!	11361.1	#NULL!	#NULL!	#NULL!	#NULL!	#NULL!	#NULL!	512	517	1	2	8	1	3	2	2	8	2	3	2	8	2	8	8	8
A979923402	A9799234	2011	1	1	1	A979	2	33	#NULL!	3	3	4	1	8046.09	7951.94	22788.4	#NULL!	21450.2	8457.45	10819.8	#NULL!	#NULL!	23884.4	#NULL!	21426.3	#NULL!	60879.5	#NULL!	60234	#NULL!	#NULL!	512	517	1	2	8	8	8	8	2	8	1	8	2	8	2	8	8	8
A979923403	A9799234	2011	1	1	1	A979	1	36	#NULL!	3	3	4	7	8046.09	11628.5	22907.4	#NULL!	29238.7	11659.9	17051.7	#NULL!	#NULL!	29711	#NULL!	34789.1	#NULL!	55403.8	#NULL!	73894.5	#NULL!	#NULL!	512	517	1	2	8	8	8	8	2	8	1	8	2	8	1	1	1	1
A979923601	A9799236	2011	1	1	1	A979	1	85	#NULL!	3	1	2	7	8046.09	4197.3	46824.5	7875.03	11282.2	4123.85	4471.66	105820	8217.18	47737.9	113517	11418.6	21150.1	78788.2	22601	88757.8	120239	142214	512	517	1	1	2	1	3	2	1	2	2	3	2	8	1	1	2	2
A979923602	A9799236	2011	1	1	1	A979	2	77	#NULL!	3	1	1	7	8046.09	4353.06	107472	9530.01	12090.2	4325.88	4331.8	163186	9944.3	113577	175129	10975.1	25461.8	219313	25379.7	199812	295462	299360	512	517	1	2	8	2	8	8	2	8	1	8	2	8	2	8	8	8
A979924501	A9799245	2011	1	1	1	A979	1	65	#NULL!	3	2	1	5	8046.09	7593.27	#NULL!	14608.3	20004.8	#NULL!	#NULL!	#NULL!	#NULL!	#NULL!	#NULL!	#NULL!	32009.2	#NULL!	#NULL!	#NULL!	#NULL!	#NULL!	512	517	1	2	8	2	8	8	2	8	1	8	2	8	2	8	8	8
A979924801	A9799248	2011	1	1	1	A979	1	72	#NULL!	#NULL!	#NULL!	2	7	8046.09	17823.3	72012.2	15750.1	11282.2	#NULL!	#NULL!	105820	#NULL!	#NULL!	#NULL!	#NULL!	42300.2	162074	#NULL!	#NULL!	206310	#NULL!	512	517	1	2	8	1	1	1	2	8	3	3	1	2	1	2	1	1
A979924802	A9799248	2011	1	1	1	A979	2	69	#NULL!	#NULL!	#NULL!	1	6	8046.09	13830.4	28112.4	10484.7	11847.3	#NULL!	#NULL!	31843.6	#NULL!	#NULL!	#NULL!	#NULL!	26737.2	67355.2	#NULL!	#NULL!	70385.7	#NULL!	512	517	1	1	1	1	3	2	2	8	1	8	2	8	1	2	1	2
A979925401	A9799254	2011	1	1	1	A979	1	64	#NULL!	2	2	#NULL!	#NULL!	8046.09	4962.99	#NULL!	12889.3	#NULL!	5675.17	5282.56	#NULL!	14446.5	#NULL!	#NULL!	#NULL!	#NULL!	#NULL!	#NULL!	#NULL!	#NULL!	#NULL!	512	517	1	2	8	2	8	8	2	8	1	8	2	8	2	8	8	8
A980919202	A9809192	2011	1	1	1	A980	2	22	#NULL!	2	2	3	7	8317.9	11087.9	#NULL!	#NULL!	#NULL!	14940.3	15006.7	#NULL!	#NULL!	#NULL!	#NULL!	#NULL!	#NULL!	#NULL!	#NULL!	#NULL!	#NULL!	#NULL!	512	517	1	2	8	8	8	8	1	2	1	8	2	8	2	8	8	8
A980919203	A9809192	2011	1	1	1	A980	1	11	#NULL!	2	2	1	#NULL!	8317.9	5282.99	33100.1	#NULL!	19781	5421.97	8331.85	#NULL!	#NULL!	18650.3	#NULL!	24773.5	#NULL!	37001.9	#NULL!	39182.6	#NULL!	#NULL!	512	517	1	2	8	8	8	8	8	8	8	8	8	8	1	1	2	1
A980919204	A9809192	2011	1	1	1	A980	2	55	#NULL!	2	2	1	6	8317.9	4528.71	31541.7	6059.91	14355.4	4266.89	5335.33	14883.9	6101.93	20782.3	14905.9	17209.1	15510.3	56564.6	15356.9	57120.6	41904.9	41649.4	512	517	1	2	8	2	8	8	2	8	1	8	2	8	2	8	8	8
A980919701	A9809197	2011	1	1	1	A980	1	73	#NULL!	2	1	2	4	8317.9	5917.3	#NULL!	15196.7	10885.8	8836.71	4314.54	#NULL!	15856.9	#NULL!	#NULL!	11017.4	40813.9	#NULL!	43613.8	#NULL!	#NULL!	#NULL!	512	517	1	2	8	2	8	8	1	1	1	8	1	2	2	8	8	8
A980919702	A9809197	2011	1	1	1	A980	2	73	#NULL!	3	1	1	3	8317.9	3981.01	#NULL!	#NULL!	11665.4	3825	4179.59	#NULL!	#NULL!	#NULL!	#NULL!	10589.5	#NULL!	#NULL!	#NULL!	#NULL!	#NULL!	#NULL!	512	517	1	2	8	2	8	8	2	8	2	3	1	1	2	8	8	8
A980920001	A9809200	2011	1	1	1	A980	1	49	#NULL!	2	3	1	5	8317.9	10944.6	#NULL!	#NULL!	44060.9	12234.5	18071.6	#NULL!	#NULL!	#NULL!	#NULL!	52340.6	#NULL!	#NULL!	#NULL!	#NULL!	#NULL!	#NULL!	512	517	1	2	8	2	8	8	2	8	1	8	2	8	2	8	8	8
A980920002	A9809200	2011	1	1	1	A980	2	49	#NULL!	2	3	2	6	8317.9	7384.01	#NULL!	19992.9	20637.9	6938.27	8548.42	#NULL!	21037.7	#NULL!	#NULL!	19291.5	46459	#NULL!	47403.9	#NULL!	#NULL!	#NULL!	512	517	1	2	8	2	8	8	2	8	1	8	2	8	2	8	8	8
A980920003	A9809200	2011	1	1	1	A980	1	19	#NULL!	2	3	3	1	8317.9	9362.28	#NULL!	#NULL!	28565.8	10469	15098.7	#NULL!	#NULL!	#NULL!	#NULL!	31730.6	#NULL!	#NULL!	#NULL!	#NULL!	#NULL!	#NULL!	512	517	1	2	8	8	8	8	2	8	1	8	1	1	2	8	8	8
A980920004	A9809200	2011	1	1	1	A980	2	18	#NULL!	2	3	3	7	8317.9	9978.82	13205.7	#NULL!	32014.1	10731	13339.7	#NULL!	#NULL!	49756.2	#NULL!	35632.8	#NULL!	90582.7	#NULL!	104206	#NULL!	#NULL!	512	517	1	2	8	8	8	8	8	8	1	8	2	8	2	8	8	8
A980920101	A9809201	2011	1	1	1	A980	2	56	#NULL!	1	1	2	7	8317.9	4528.71	#NULL!	6059.91	14355.4	8533.77	10670.7	#NULL!	12203.9	#NULL!	#NULL!	25813.6	15510.3	#NULL!	30713.8	#NULL!	#NULL!	#NULL!	512	517	1	2	8	1	1	2	1	2	1	8	2	8	2	8	8	8
A980920102	A9809201	2011	1	1	1	A980	1	64	#NULL!	1	1	4	3	8317.9	4788.6	#NULL!	6218.2	13769.8	#NULL!	#NULL!	#NULL!	#NULL!	#NULL!	#NULL!	#NULL!	16031.2	#NULL!	#NULL!	#NULL!	#NULL!	#NULL!	512	517	1	2	8	2	8	8	2	8	1	8	2	8	2	8	8	8
A980920401	A9809204	2011	1	1	1	A980	1	52	#NULL!	2	3	2	5	8317.9	9554.72	28650.9	11502.8	30394.5	14778.1	16284.6	19180.3	13921.2	30977.5	22234.3	38552.4	33189.2	68376	35791.3	67835.6	48488.3	50268	512	517	1	2	8	2	8	8	2	8	1	8	2	8	2	8	8	8
A980920402	A9809204	2011	1	1	1	A980	2	48	#NULL!	2	3	3	2	8317.9	7384.01	27688.5	9996.45	20637.9	9251.03	11397.9	19258	10518.8	26976.8	20165.7	25722	23229.5	59671.2	23702	64112.1	46157.5	49210.5	512	517	1	2	8	2	8	8	1	2	1	8	2	8	2	8	8	8
A980920403	A9809204	2011	1	1	1	A980	1	23	#NULL!	2	3	3	7	8317.9	11936.6	#NULL!	#NULL!	49701.2	#NULL!	#NULL!	#NULL!	#NULL!	#NULL!	#NULL!	#NULL!	#NULL!	#NULL!	#NULL!	#NULL!	#NULL!	#NULL!	512	517	1	2	8	8	8	8	2	8	1	8	2	8	2	8	8	8
A980920404	A9809204	2011	1	1	1	A980	1	19	#NULL!	2	3	3	6	8317.9	9362.28	#NULL!	#NULL!	28565.8	13958.7	19798.1	#NULL!	#NULL!	#NULL!	#NULL!	42307.5	#NULL!	#NULL!	#NULL!	#NULL!	#NULL!	#NULL!	512	517	1	2	8	8	8	8	1	1	1	8	2	8	2	8	8	8
A980920801	A9809208	2011	1	1	1	A980	1	75	#NULL!	2	1	3	7	8317.9	6074.72	#NULL!	#NULL!	16328.6	3978.95	6471.81	#NULL!	#NULL!	#NULL!	#NULL!	16526	#NULL!	#NULL!	#NULL!	#NULL!	#NULL!	#NULL!	512	517	1	2	8	2	8	8	2	8	1	8	1	2	1	1	1	1
A980920802	A9809208	2011	1	1	1	A980	2	64	#NULL!	1	1	1	7	8317.9	7064.56	25452.6	15249.2	18630.6	4975.89	6836.6	36111.1	15937.9	25928	37632.6	16442.8	35595.8	62740.9	37630.6	63641.4	99896.6	100652	512	517	1	2	8	2	8	8	2	8	1	8	2	8	2	8	8	8
A980921901	A9809219	2011	1	1	1	A980	1	40	#NULL!	3	3	3	3	8317.9	12597.4	15228	13977.6	34875.7	13890.5	17499.9	20816	18282.1	16937.3	25637.3	46811.2	34691.7	28642.9	49190.2	33398.5	43415.5	54444.2	512	517	1	2	8	2	8	8	2	8	1	8	2	8	1	1	1	1
A980921902	A9809219	2011	1	1	1	A980	2	38	#NULL!	3	3	3	7	8317.9	6453.66	15552.9	#NULL!	17910.3	6772.18	7926.74	#NULL!	#NULL!	15357.6	#NULL!	17238.1	#NULL!	34654.9	#NULL!	36695.3	#NULL!	#NULL!	512	517	1	2	8	8	8	8	2	8	1	8	2	8	2	8	8	8
A980921903	A9809219	2011	1	1	1	A980	2	8	#NULL!	3	3	1	#NULL!	8317.9	5033.76	#NULL!	#NULL!	#NULL!	5478.22	6894.54	#NULL!	#NULL!	#NULL!	#NULL!	#NULL!	#NULL!	#NULL!	#NULL!	#NULL!	#NULL!	#NULL!	512	517	1	2	8	8	8	8	8	8	8	8	8	8	1	2	1	1
A980921904	A9809219	2011	1	1	1	A980	1	2	34	3	3	1	#NULL!	8317.9	4354.86	#NULL!	#NULL!	#NULL!	4305.01	6115.92	#NULL!	#NULL!	#NULL!	#NULL!	#NULL!	#NULL!	#NULL!	#NULL!	#NULL!	#NULL!	#NULL!	512	517	1	8	8	8	8	8	8	8	8	8	8	8	8	8	8	8
A980921905	A9809219	2011	1	1	1	A980	2	1	18	4	3	1	#NULL!	8317.9	4048.07	#NULL!	#NULL!	#NULL!	3886.76	6202.24	#NULL!	#NULL!	#NULL!	#NULL!	#NULL!	#NULL!	#NULL!	#NULL!	#NULL!	#NULL!	#NULL!	512	517	1	8	8	8	8	8	8	8	8	8	8	8	8	8	8	8
A980922301	A9809223	2011	1	1	1	A980	1	70	#NULL!	1	1	1	7	8317.9	5917.3	#NULL!	#NULL!	21771.5	#NULL!	#NULL!	#NULL!	#NULL!	#NULL!	#NULL!	#NULL!	#NULL!	#NULL!	#NULL!	#NULL!	#NULL!	#NULL!	512	517	1	2	8	2	8	8	2	8	2	3	2	8	2	8	8	8
A980922302	A9809223	2011	1	1	1	A980	2	67	#NULL!	1	1	1	6	8317.9	4448.16	#NULL!	#NULL!	#NULL!	#NULL!	#NULL!	#NULL!	#NULL!	#NULL!	#NULL!	#NULL!	#NULL!	#NULL!	#NULL!	#NULL!	#NULL!	#NULL!	512	517	1	2	8	2	8	8	2	8	2	3	2	8	2	8	8	8
A980922401	A9809224	2011	1	1	1	A980	1	76	#NULL!	1	1	1	7	8317.9	4049.82	72012.2	15196.7	10885.8	3978.95	4314.54	105820	15856.9	76148	113517	11017.4	40813.9	152040	43613.8	171278	206310	232302	512	517	1	2	8	2	8	8	2	8	1	8	1	1	2	8	8	8
A980922402	A9809224	2011	1	1	1	A980	2	70	#NULL!	1	1	1	7	8317.9	3981.01	#NULL!	#NULL!	11665.4	3825	4179.59	#NULL!	#NULL!	#NULL!	#NULL!	10589.5	#NULL!	#NULL!	#NULL!	#NULL!	#NULL!	#NULL!	512	517	1	2	8	2	8	8	2	8	1	8	2	8	2	8	8	8
A980923601	A9809236	2011	1	1	1	A980	1	70	#NULL!	1	1	1	7	8317.9	5917.3	72012.2	#NULL!	10885.8	8836.71	4314.54	#NULL!	#NULL!	76148	#NULL!	11017.4	#NULL!	152040	#NULL!	171278	#NULL!	#NULL!	512	517	1	2	8	2	8	8	2	8	1	8	1	1	2	8	8	8
A980923602	A9809236	2011	1	1	1	A980	2	68	#NULL!	1	1	1	6	8317.9	4448.16	#NULL!	10116.3	11431	6443.5	4192.54	#NULL!	11455.3	#NULL!	#NULL!	10894.3	25797.7	#NULL!	29166	#NULL!	#NULL!	#NULL!	512	517	1	2	8	1	2	2	2	8	1	8	2	8	2	8	8	8
A980923801	A9809238	2011	1	1	1	A980	1	49	#NULL!	2	3	3	5	8317.9	10944.6	#NULL!	#NULL!	44060.9	12234.5	18071.6	#NULL!	#NULL!	#NULL!	#NULL!	52340.6	#NULL!	#NULL!	#NULL!	#NULL!	#NULL!	#NULL!	512	517	1	2	8	2	8	8	2	8	1	8	2	8	1	2	2	1
A980924501	A9809245	2011	1	1	1	A980	1	68	#NULL!	3	3	2	6	8317.9	3663.23	#NULL!	7047.5	9650.94	4440.41	4730.28	#NULL!	7681.42	#NULL!	#NULL!	10129.6	15442.2	#NULL!	16756.8	#NULL!	#NULL!	#NULL!	512	517	1	1	2	2	8	8	2	8	1	8	1	2	1	1	2	2
A980924801	A9809248	2011	1	1	1	A980	2	45	#NULL!	2	3	3	3	8317.9	7384.01	#NULL!	9996.45	20637.9	6938.27	8548.42	#NULL!	10518.8	#NULL!	#NULL!	19291.5	23229.5	#NULL!	23702	#NULL!	#NULL!	#NULL!	512	517	1	2	8	2	8	8	2	8	1	8	2	8	2	8	8	8
A980924802	A9809248	2011	1	1	1	A980	1	17	#NULL!	2	3	2	7	8317.9	9362.28	#NULL!	#NULL!	28565.8	10469	15098.7	#NULL!	#NULL!	#NULL!	#NULL!	31730.6	#NULL!	#NULL!	#NULL!	#NULL!	#NULL!	#NULL!	512	517	1	2	8	8	8	8	8	8	1	8	1	1	2	8	8	8
A980924803	A9809248	2011	1	1	1	A980	1	15	#NULL!	2	3	2	7	8317.9	9362.28	32216.7	#NULL!	28565.8	10469	15098.7	#NULL!	#NULL!	30321	#NULL!	31730.6	#NULL!	54306.4	#NULL!	67099.1	#NULL!	#NULL!	512	517	1	2	8	8	8	8	8	8	1	8	2	8	2	8	8	8
A980924804	A9809248	2011	1	1	1	A980	2	27	#NULL!	2	3	4	2	8317.9	12568.7	20427	#NULL!	30731.6	11883.8	12433.7	#NULL!	#NULL!	23574.9	#NULL!	31558.3	#NULL!	56401.9	#NULL!	58403.6	#NULL!	#NULL!	512	517	1	2	8	8	8	8	2	8	1	8	1	2	1	2	1	1
A980924901	A9809249	2011	1	1	1	A980	1	27	#NULL!	1	2	3	7	8317.9	14192.6	#NULL!	#NULL!	43774.3	19059.8	22424	#NULL!	#NULL!	#NULL!	#NULL!	49938.8	#NULL!	#NULL!	#NULL!	#NULL!	#NULL!	#NULL!	512	517	1	2	8	8	8	8	2	8	1	8	2	8	2	8	8	8
A981921601	A9819216	2011	1	1	1	A981	1	63	#NULL!	4	4	2	5	6705.08	4962.99	17319.6	6444.64	14271.3	5675.17	5282.56	25231	7223.26	17737.6	27970.5	13826.9	16615	46577.9	18219.5	48151.7	63271	65022.9	512	517	1	2	8	2	8	8	2	8	2	3	1	1	2	8	8	8
A981921602	A9819216	2011	1	1	1	A981	2	59	#NULL!	4	4	1	5	6705.08	4693.63	#NULL!	6280.59	14878.1	4422.27	5529.63	#NULL!	6324.14	#NULL!	#NULL!	13376.8	16075.1	#NULL!	15916.1	#NULL!	#NULL!	#NULL!	512	517	1	2	8	1	2	2	2	8	1	8	2	8	2	8	8	8
A981921701	A9819217	2011	1	1	1	A981	1	40	#NULL!	1	2	2	6	6705.08	13056.2	47347.8	24612.4	36145.7	14396.3	20757.5	43148.2	28010.8	52662.4	53141.9	48515.9	64402	89057.8	74940.2	103844	89993.2	112854	512	517	1	2	8	2	8	8	2	8	1	8	2	8	1	2	1	1
A981921702	A9819217	2011	1	1	1	A981	2	38	#NULL!	1	2	3	6	6705.08	6688.68	#NULL!	#NULL!	18562.6	7018.8	10269.3	#NULL!	#NULL!	#NULL!	#NULL!	17865.9	#NULL!	#NULL!	#NULL!	#NULL!	#NULL!	#NULL!	512	517	1	2	8	8	8	8	2	8	1	8	1	1	2	8	8	8
A981921704	A9819217	2011	1	1	1	A981	2	5	66	2	2	1	#NULL!	6705.08	5217.07	#NULL!	#NULL!	#NULL!	5677.72	8932.02	#NULL!	#NULL!	#NULL!	#NULL!	#NULL!	#NULL!	#NULL!	#NULL!	#NULL!	#NULL!	#NULL!	512	517	1	2	8	8	8	8	8	8	8	8	8	8	8	8	8	8
A981921705	A9819217	2011	1	1	1	A981	2	64	#NULL!	2	2	1	7	6705.08	4881.22	#NULL!	#NULL!	12872.7	5157.09	5904.64	#NULL!	#NULL!	#NULL!	#NULL!	11361.1	#NULL!	#NULL!	#NULL!	#NULL!	#NULL!	#NULL!	512	517	1	2	8	2	8	8	2	8	1	8	2	8	2	8	8	8
A981921801	A9819218	2011	1	1	1	A981	1	57	#NULL!	2	2	1	5	6705.08	14346.2	#NULL!	18179.3	20246.2	#NULL!	#NULL!	#NULL!	#NULL!	#NULL!	#NULL!	#NULL!	43789	#NULL!	#NULL!	#NULL!	#NULL!	#NULL!	512	517	1	2	8	2	8	8	2	8	1	8	1	1	2	8	8	8
A981921802	A9819218	2011	1	1	1	A981	2	50	#NULL!	2	2	1	6	6705.08	12241.9	#NULL!	#NULL!	18552.9	11832.3	19438.1	#NULL!	#NULL!	#NULL!	#NULL!	52565.3	#NULL!	#NULL!	#NULL!	#NULL!	#NULL!	#NULL!	512	517	1	2	8	2	8	8	2	8	2	3	2	8	2	8	8	8
A981922101	A9819221	2011	1	1	1	A981	1	75	#NULL!	4	3	1	7	6705.08	4197.3	#NULL!	11812.5	11282.2	4123.85	4471.66	#NULL!	12325.8	#NULL!	#NULL!	11418.6	31725.1	#NULL!	33901.6	#NULL!	#NULL!	#NULL!	512	517	1	2	8	2	8	8	2	8	1	8	2	8	1	2	2	2
A981922102	A9819221	2011	1	1	1	A981	2	71	#NULL!	4	3	1	7	6705.08	4125.99	#NULL!	#NULL!	12090.2	3964.29	4331.8	#NULL!	#NULL!	#NULL!	#NULL!	10975.1	#NULL!	#NULL!	#NULL!	#NULL!	#NULL!	#NULL!	512	517	1	2	8	1	2	2	2	8	1	8	2	8	2	8	8	8
A981922103	A9819221	2011	1	1	1	A981	2	45	#NULL!	3	3	4	3	6705.08	7652.91	43045.3	15540.7	21389.4	7190.94	8859.72	59877.9	16352.9	41938.7	62700.2	19994	36113.2	92766.4	36847.7	99670.3	143515	153008	512	517	1	2	8	2	8	8	2	8	1	8	1	1	2	8	8	8
A981922301	A9819223	2011	1	1	1	A981	2	35	#NULL!	3	4	4	7	6705.08	6688.68	#NULL!	#NULL!	#NULL!	7018.8	8215.41	#NULL!	#NULL!	#NULL!	#NULL!	#NULL!	#NULL!	#NULL!	#NULL!	#NULL!	#NULL!	#NULL!	512	517	1	2	8	8	8	8	2	8	1	8	2	8	2	8	8	8
A981922302	A9819223	2011	1	1	1	A981	1	38	#NULL!	4	4	4	1	6705.08	11628.5	#NULL!	#NULL!	43858.1	11659.9	17051.7	#NULL!	#NULL!	#NULL!	#NULL!	52183.6	#NULL!	#NULL!	#NULL!	#NULL!	#NULL!	#NULL!	512	517	1	2	8	8	8	8	2	8	1	8	2	8	2	8	8	8
A981922303	A9819223	2011	1	1	1	A981	2	28	#NULL!	3	4	4	1	6705.08	13026.4	31756.4	#NULL!	47776.1	12316.6	12886.5	#NULL!	#NULL!	36650.2	#NULL!	49061.3	#NULL!	87683.8	#NULL!	90795.6	#NULL!	#NULL!	512	517	1	2	8	8	8	8	2	8	1	8	2	8	2	8	8	8
A981922701	A9819227	2011	1	1	1	A981	2	57	#NULL!	2	2	1	1	6705.08	4693.63	#NULL!	6280.59	14878.1	4422.27	5529.63	#NULL!	6324.14	#NULL!	#NULL!	13376.8	16075.1	#NULL!	15916.1	#NULL!	#NULL!	#NULL!	512	517	1	2	8	2	8	8	2	8	1	8	2	8	2	8	8	8
A981922702	A9819227	2011	1	1	1	A981	1	61	#NULL!	2	2	2	5	6705.08	4962.99	#NULL!	6444.64	14271.3	5675.17	5282.56	#NULL!	7223.26	#NULL!	#NULL!	13826.9	16615	#NULL!	18219.5	#NULL!	#NULL!	#NULL!	512	517	1	2	8	1	2	2	2	8	1	8	2	8	2	8	8	8
A981923002	A9819230	2011	1	1	1	A981	2	73	#NULL!	2	1	2	7	6705.08	8251.97	#NULL!	#NULL!	24180.3	3964.29	8663.6	#NULL!	#NULL!	#NULL!	#NULL!	21950.2	#NULL!	#NULL!	#NULL!	#NULL!	#NULL!	#NULL!	512	517	1	2	8	1	2	2	2	8	1	8	1	1	2	8	8	8
A981923201	A9819232	2011	1	1	1	A981	1	58	#NULL!	2	3	1	6	6705.08	9564.13	#NULL!	9089.66	20246.2	11253.3	11158.9	#NULL!	10508.8	#NULL!	#NULL!	25811.3	21894.5	#NULL!	25777.6	#NULL!	#NULL!	#NULL!	512	517	1	2	8	2	8	8	2	8	1	8	1	2	1	1	2	2
A981923202	A9819232	2011	1	1	1	A981	2	56	#NULL!	2	3	3	7	6705.08	6258.17	#NULL!	6280.59	14878.1	5896.36	7372.84	#NULL!	6324.14	#NULL!	#NULL!	17835.8	16075.1	#NULL!	15916.1	#NULL!	#NULL!	#NULL!	512	517	1	2	8	1	2	2	2	8	1	8	2	8	2	8	8	8
A981923204	A9819232	2011	1	1	1	A981	1	25	#NULL!	2	3	4	1	6705.08	18436.3	54457.4	#NULL!	45368.4	19549.1	22424	#NULL!	#NULL!	63760.2	#NULL!	58835.1	#NULL!	146016	#NULL!	171774	#NULL!	#NULL!	512	517	1	2	8	8	8	8	2	8	1	8	2	8	2	8	8	8
A981923401	A9819234	2011	1	1	1	A981	1	53	#NULL!	2	3	4	2	6705.08	9902.67	#NULL!	11921.7	31501.4	17230.8	18987.3	#NULL!	14428.2	#NULL!	#NULL!	44950.9	34397.8	#NULL!	37094.7	#NULL!	#NULL!	#NULL!	512	517	1	2	8	2	8	8	2	8	1	8	2	8	2	8	8	8
A981923403	A9819234	2011	1	1	1	A981	2	26	#NULL!	2	3	4	2	6705.08	13026.4	21170.9	#NULL!	31850.8	18474.9	19329.7	#NULL!	#NULL!	36650.2	#NULL!	49061.3	#NULL!	43841.9	#NULL!	90795.6	#NULL!	#NULL!	512	517	1	2	8	8	8	8	2	8	1	8	2	8	2	8	8	8
A981923405	A9819234	2011	1	1	1	A981	1	17	#NULL!	2	3	2	7	6705.08	9703.22	33389.9	#NULL!	29606.1	#NULL!	#NULL!	#NULL!	#NULL!	#NULL!	#NULL!	#NULL!	#NULL!	42213	#NULL!	#NULL!	#NULL!	#NULL!	512	517	1	2	8	8	8	8	8	8	1	8	1	1	2	8	8	8
A981923601	A9819236	2011	1	1	1	A981	2	76	#NULL!	1	1	1	7	6705.08	4353.06	#NULL!	9530.01	12090.2	4325.88	4331.8	#NULL!	9944.3	#NULL!	#NULL!	10975.1	25461.8	#NULL!	25379.7	#NULL!	#NULL!	#NULL!	512	517	1	2	8	1	1	2	2	8	1	8	2	8	2	8	8	8
A981923801	A9819238	2011	1	1	1	A981	1	78	#NULL!	4	3	1	7	6705.08	4197.3	#NULL!	#NULL!	11282.2	4123.85	4471.66	#NULL!	#NULL!	#NULL!	#NULL!	11418.6	#NULL!	#NULL!	#NULL!	#NULL!	#NULL!	#NULL!	512	517	1	2	8	2	8	8	2	8	1	8	2	8	2	8	8	8
A981923902	A9819239	2011	1	1	1	A981	2	53	#NULL!	3	3	4	7	6705.08	12241.9	56726.2	#NULL!	37105.9	18797.9	19438.1	#NULL!	#NULL!	56157.5	#NULL!	52565.3	#NULL!	125245	#NULL!	127619	#NULL!	#NULL!	512	517	1	2	8	2	8	8	2	8	1	8	2	8	2	8	8	8
A981923903	A9819239	2011	1	1	1	A981	2	26	#NULL!	3	3	3	2	6705.08	18740.1	#NULL!	#NULL!	#NULL!	#NULL!	#NULL!	#NULL!	#NULL!	#NULL!	#NULL!	#NULL!	#NULL!	#NULL!	#NULL!	#NULL!	#NULL!	#NULL!	512	517	1	2	8	8	8	8	2	8	1	8	2	8	2	8	8	8
A981924101	A9819241	2011	1	1	1	A981	1	58	#NULL!	2	2	3	4	6705.08	10759.6	31053.1	9089.66	20246.2	12660	11158.9	27726.9	10508.8	34295.4	30622.6	29037.7	21894.5	70566.6	25777.6	75832.1	64292.4	68786.9	512	517	1	2	8	2	8	8	2	8	2	3	2	8	2	8	8	8
A981924102	A9819241	2011	1	1	1	A981	2	55	#NULL!	2	2	2	6	6705.08	7040.44	#NULL!	6280.59	14878.1	6633.41	7372.84	#NULL!	6324.14	#NULL!	#NULL!	20065.2	16075.1	#NULL!	15916.1	#NULL!	#NULL!	#NULL!	512	517	1	1	2	2	8	8	2	8	1	8	1	1	1	1	2	2
A981924104	A9819241	2011	1	1	1	A981	2	1	13	2	2	1	#NULL!	6705.08	6293.24	#NULL!	#NULL!	#NULL!	6042.46	8570.81	#NULL!	#NULL!	#NULL!	#NULL!	#NULL!	#NULL!	#NULL!	#NULL!	#NULL!	#NULL!	#NULL!	512	517	1	8	8	8	8	8	8	8	8	8	8	8	8	8	8	8
A981924601	A9819246	2011	1	1	1	A981	2	63	#NULL!	3	2	4	1	6705.08	4881.22	#NULL!	10536.3	25745.3	5157.09	4723.71	#NULL!	11012.2	#NULL!	#NULL!	17041.6	24594.7	#NULL!	26000.6	#NULL!	#NULL!	#NULL!	512	517	1	2	8	2	8	8	2	8	2	3	2	8	2	8	8	8
A981924602	A9819246	2011	1	1	1	A981	1	69	#NULL!	3	2	#NULL!	#NULL!	6705.08	3796.63	#NULL!	#NULL!	#NULL!	4602.11	4902.54	#NULL!	#NULL!	#NULL!	#NULL!	#NULL!	#NULL!	#NULL!	#NULL!	#NULL!	#NULL!	#NULL!	512	517	1	2	8	2	8	8	2	8	1	8	2	8	2	8	8	8
A981924603	A9819246	2011	1	1	1	A981	1	34	#NULL!	2	2	4	1	6705.08	10096.9	#NULL!	#NULL!	52707.3	10604.6	20456.2	#NULL!	#NULL!	#NULL!	#NULL!	59786.6	#NULL!	#NULL!	#NULL!	#NULL!	#NULL!	#NULL!	512	517	1	2	8	8	8	8	2	8	1	8	2	8	2	8	8	8
A981925001	A9819250	2011	1	1	1	A981	1	37	#NULL!	3	3	3	3	6705.08	11628.5	30543.3	#NULL!	29238.7	11659.9	17051.7	#NULL!	#NULL!	39614.7	#NULL!	34789.1	#NULL!	73871.7	#NULL!	98526	#NULL!	#NULL!	512	517	1	2	8	8	8	8	2	8	1	8	2	8	2	8	8	8
A981925002	A9819250	2011	1	1	1	A981	2	37	#NULL!	2	3	4	3	6705.08	6688.68	#NULL!	#NULL!	18562.6	7018.8	8215.41	#NULL!	#NULL!	#NULL!	#NULL!	17865.9	#NULL!	#NULL!	#NULL!	#NULL!	#NULL!	#NULL!	512	517	1	2	8	8	8	8	2	8	1	8	2	8	2	8	8	8
A981925003	A9819250	2011	1	1	1	A981	1	8	#NULL!	3	3	1	#NULL!	6705.08	5497.32	#NULL!	#NULL!	#NULL!	5028.65	7362.23	#NULL!	#NULL!	#NULL!	#NULL!	#NULL!	#NULL!	#NULL!	#NULL!	#NULL!	#NULL!	#NULL!	512	517	1	2	8	8	8	8	8	8	8	8	8	8	2	8	8	8
A981925004	A9819250	2011	1	1	1	A981	2	6	79	3	3	1	#NULL!	6705.08	5217.07	#NULL!	#NULL!	#NULL!	5677.72	7145.62	#NULL!	#NULL!	#NULL!	#NULL!	#NULL!	#NULL!	#NULL!	#NULL!	#NULL!	#NULL!	#NULL!	512	517	1	2	8	8	8	8	8	8	8	8	8	8	2	8	8	8
A981925201	A9819252	2011	1	1	1	A981	1	67	#NULL!	2	2	2	1	6705.08	3796.63	#NULL!	7304.15	10002.4	4602.11	4902.54	#NULL!	7961.15	#NULL!	#NULL!	10498.5	16004.6	#NULL!	17367	#NULL!	#NULL!	#NULL!	512	517	1	2	8	2	8	8	2	8	1	8	2	8	2	8	8	8
A981925202	A9819252	2011	1	1	1	A981	2	62	#NULL!	2	2	2	7	6705.08	4881.22	#NULL!	5268.16	12872.7	5157.09	4723.71	#NULL!	5506.11	#NULL!	#NULL!	11361.1	12297.4	#NULL!	13000.3	#NULL!	#NULL!	#NULL!	512	517	1	2	8	2	8	8	1	1	1	8	2	8	2	8	8	8
A981925203	A9819252	2011	1	1	1	A981	2	33	#NULL!	1	2	3	7	6705.08	7951.94	57223.9	#NULL!	21450.2	8457.45	10819.8	#NULL!	#NULL!	63478.1	#NULL!	21426.3	#NULL!	148311	#NULL!	160624	#NULL!	#NULL!	512	517	1	1	2	8	8	8	2	8	1	8	2	8	1	1	2	1
A981925204	A9819252	2011	1	1	1	A981	1	54	#NULL!	1	2	3	5	6705.08	9902.67	#NULL!	11921.7	31501.4	11487.2	12658.2	#NULL!	14428.2	#NULL!	#NULL!	29967.2	34397.8	#NULL!	37094.7	#NULL!	#NULL!	#NULL!	512	517	1	2	8	2	8	8	2	8	1	8	1	1	2	8	8	8
A981925401	A9819254	2011	1	1	1	A981	1	67	#NULL!	1	1	3	6	6705.08	3796.63	#NULL!	10956.2	10002.4	#NULL!	#NULL!	#NULL!	#NULL!	#NULL!	#NULL!	#NULL!	24006.9	#NULL!	#NULL!	#NULL!	#NULL!	#NULL!	512	517	1	2	8	2	8	8	2	8	1	8	2	8	2	8	8	8
A981925402	A9819254	2011	1	1	1	A981	2	69	#NULL!	1	1	1	7	6705.08	4610.14	18741.6	#NULL!	11847.3	13356.3	8690.44	#NULL!	#NULL!	20111.9	#NULL!	22582.1	#NULL!	44903.4	#NULL!	48185.5	#NULL!	#NULL!	512	517	1	2	8	1	2	1	2	8	2	3	1	2	2	8	8	8
A981925403	A9819254	2011	1	1	1	A981	1	40	#NULL!	1	1	4	3	6705.08	13056.2	31565.2	21729.9	36145.7	19020.1	20757.5	64722.3	28010.8	35108.2	79712.9	56810.2	53932.6	59371.9	74940.2	69229.6	134990	169281	512	517	1	2	8	2	8	8	2	8	1	8	2	8	2	8	8	8
A981925404	A9819254	2011	1	1	1	A981	2	31	#NULL!	1	1	4	5	6705.08	7951.94	#NULL!	#NULL!	21450.2	#NULL!	#NULL!	#NULL!	#NULL!	#NULL!	#NULL!	#NULL!	#NULL!	#NULL!	#NULL!	#NULL!	#NULL!	#NULL!	512	517	1	2	8	8	8	8	2	8	1	8	2	8	2	8	8	8
A981928401	A9819284	2011	1	1	1	A981	1	64	#NULL!	1	2	4	6	6705.08	4962.99	#NULL!	#NULL!	14271.3	5675.17	5282.56	#NULL!	#NULL!	#NULL!	#NULL!	13826.9	#NULL!	#NULL!	#NULL!	#NULL!	#NULL!	#NULL!	512	517	1	1	2	1	1	2	1	1	2	3	1	2	2	8	8	8
A982918305	A9829183	2011	1	1	1	A982	1	61	#NULL!	1	1	2	7	11645.1	14365.8	#NULL!	#NULL!	13769.8	5475.76	19169.9	#NULL!	#NULL!	#NULL!	#NULL!	40023.2	#NULL!	#NULL!	#NULL!	#NULL!	#NULL!	#NULL!	512	517	1	2	8	2	8	8	2	8	1	8	1	1	1	2	2	2
A982918802	A9829188	2011	1	1	1	A982	2	54	#NULL!	1	1	1	3	11645.1	17717.7	41049.7	14960.4	35802.1	17124.9	18809.1	37731	15544.2	40638.2	39537.5	45157.7	36181.1	90633	36770.9	92351.2	94871.7	95571.7	512	517	1	2	8	2	8	8	2	8	1	8	2	8	2	8	8	8
A982919103	A9829191	2011	1	1	1	A982	2	2	30	1	2	1	#NULL!	11645.1	8096.15	#NULL!	#NULL!	#NULL!	3886.76	8269.66	#NULL!	#NULL!	#NULL!	#NULL!	#NULL!	#NULL!	#NULL!	#NULL!	#NULL!	#NULL!	#NULL!	512	517	1	8	8	8	8	8	8	8	8	8	8	8	8	8	8	8
A982919104	A9829191	2011	1	1	1	A982	1	1	14	1	2	1	#NULL!	11645.1	8709.73	#NULL!	#NULL!	#NULL!	4305.01	8154.56	#NULL!	#NULL!	#NULL!	#NULL!	#NULL!	#NULL!	#NULL!	#NULL!	#NULL!	#NULL!	#NULL!	512	517	1	8	8	8	8	8	8	8	8	8	8	8	8	8	8	8
A982920001	A9829200	2011	1	1	1	A982	2	68	#NULL!	4	4	1	7	11645.1	4448.16	#NULL!	5058.15	11431	#NULL!	#NULL!	#NULL!	#NULL!	#NULL!	#NULL!	#NULL!	12898.8	#NULL!	#NULL!	#NULL!	#NULL!	#NULL!	512	517	1	2	8	2	8	8	2	8	1	8	1	1	2	8	8	8
A982920002	A9829200	2011	1	1	1	A982	1	67	#NULL!	4	4	4	1	11645.1	3663.23	14266.5	7047.5	9650.94	8880.81	7095.42	22533.7	15362.8	11232.5	23507	15194.4	15442.2	23458.8	33513.5	26462.7	51671.6	54183.1	512	517	1	2	8	1	3	2	2	8	1	8	3	8	1	1	1	1
A982920003	A9829200	2011	1	1	1	A982	1	11	#NULL!	4	4	1	#NULL!	11645.1	5282.99	22066.7	#NULL!	19781	10843.9	12497.8	#NULL!	#NULL!	13987.7	#NULL!	27870.1	#NULL!	27751.4	#NULL!	29386.9	#NULL!	#NULL!	512	517	1	2	8	8	8	8	8	8	8	8	8	8	1	2	1	1
A982921401	A9829214	2011	1	1	1	A982	1	31	#NULL!	1	1	4	7	11645.1	9742.08	18212.1	#NULL!	43301.3	10232	19737.5	#NULL!	#NULL!	23588.8	#NULL!	57183	#NULL!	55359.9	#NULL!	78959.2	#NULL!	#NULL!	512	517	1	2	8	8	8	8	2	8	1	8	2	8	2	8	8	8
A982921402	A9829214	2011	1	1	1	A982	2	28	#NULL!	1	1	3	7	11645.1	12568.7	10213.5	#NULL!	30731.6	11883.8	12433.7	#NULL!	#NULL!	11787.5	#NULL!	31558.3	#NULL!	28201	#NULL!	29201.8	#NULL!	#NULL!	512	517	1	1	2	8	8	8	2	8	1	8	1	1	1	1	2	1
A982921403	A9829214	2011	1	1	1	A982	2	4	49	1	1	1	#NULL!	11645.1	4048.07	#NULL!	#NULL!	#NULL!	3886.76	6202.24	#NULL!	#NULL!	#NULL!	#NULL!	#NULL!	#NULL!	#NULL!	#NULL!	#NULL!	#NULL!	#NULL!	512	517	1	2	8	8	8	8	8	8	8	8	8	8	8	8	8	8
A982921404	A9829214	2011	1	1	1	A982	2	2	29	1	1	1	#NULL!	11645.1	4048.07	#NULL!	#NULL!	#NULL!	3886.76	6202.24	#NULL!	#NULL!	#NULL!	#NULL!	#NULL!	#NULL!	#NULL!	#NULL!	#NULL!	#NULL!	#NULL!	512	517	1	8	8	8	8	8	8	8	8	8	8	8	8	8	8	8
A982922701	A9829227	2011	1	1	1	A982	1	73	#NULL!	1	1	3	7	11645.1	5917.3	#NULL!	15196.7	10885.8	8836.71	4314.54	#NULL!	15856.9	#NULL!	#NULL!	11017.4	40813.9	#NULL!	43613.8	#NULL!	#NULL!	#NULL!	512	517	1	2	8	2	8	8	2	8	1	8	1	2	1	1	2	1
A982922702	A9829227	2011	1	1	1	A982	2	68	#NULL!	1	1	1	7	11645.1	4448.16	18083.1	#NULL!	11431	6443.5	4192.54	#NULL!	#NULL!	19405.2	#NULL!	10894.3	#NULL!	43325.7	#NULL!	46492.4	#NULL!	#NULL!	512	517	1	2	8	1	2	2	1	2	2	3	3	8	2	8	8	8
A982923401	A9829234	2011	1	1	1	A982	2	64	#NULL!	3	2	3	7	11645.1	4709.7	#NULL!	5083.05	12420.4	4975.89	4557.73	#NULL!	5312.64	#NULL!	#NULL!	10961.9	11865.3	#NULL!	12543.5	#NULL!	#NULL!	#NULL!	512	517	1	2	8	2	8	8	2	8	1	8	1	1	2	8	8	8
A982923402	A9829234	2011	1	1	1	A982	1	68	#NULL!	3	2	3	2	11645.1	3663.23	#NULL!	7047.5	9650.94	4440.41	4730.28	#NULL!	7681.42	#NULL!	#NULL!	10129.6	15442.2	#NULL!	16756.8	#NULL!	#NULL!	#NULL!	512	517	1	2	8	2	8	8	2	8	1	8	1	1	2	8	8	8
A982923601	A9829236	2011	1	1	1	A982	1	52	#NULL!	1	1	2	7	11645.1	9554.72	28650.9	11502.8	30394.5	11083.6	12213.5	38360.6	13921.2	30977.5	44468.6	28914.3	33189.2	68376	35791.3	67835.6	96976.6	100536	512	517	1	2	8	2	8	8	2	8	1	8	1	1	2	8	8	8
A982923602	A9829236	2011	1	1	1	A982	2	52	#NULL!	1	1	3	3	11645.1	5905.89	#NULL!	7480.19	17901	5708.29	6269.72	#NULL!	7772.12	#NULL!	#NULL!	15052.6	18090.5	#NULL!	18385.4	#NULL!	#NULL!	#NULL!	512	517	1	2	8	2	8	8	2	8	1	8	2	8	2	8	8	8
A982923603	A9829236	2011	1	1	1	A982	2	8	#NULL!	1	1	1	#NULL!	11645.1	5033.76	#NULL!	#NULL!	#NULL!	5478.22	6894.54	#NULL!	#NULL!	#NULL!	#NULL!	#NULL!	#NULL!	#NULL!	#NULL!	#NULL!	#NULL!	#NULL!	512	517	1	2	8	8	8	8	8	8	8	8	8	8	2	8	8	8
A982923801	A9829238	2011	1	1	1	A982	1	75	#NULL!	4	3	1	6	11645.1	4049.82	#NULL!	#NULL!	10885.8	3978.95	4314.54	#NULL!	#NULL!	#NULL!	#NULL!	11017.4	#NULL!	#NULL!	#NULL!	#NULL!	#NULL!	#NULL!	512	517	1	2	8	1	3	1	2	8	1	8	2	8	2	8	8	8
A982923803	A9829238	2011	1	1	1	A982	1	49	#NULL!	2	3	3	5	11645.1	10944.6	35937	24490.4	44060.9	12234.5	18071.6	44497.2	27179.2	43354.5	56360.1	52340.6	65054.8	86205.1	73762	110653	117130	146627	512	517	1	2	8	2	8	8	2	8	1	8	2	8	2	8	8	8
A982924701	A9829247	2011	1	1	1	A982	1	49	#NULL!	4	4	3	3	11645.1	10944.6	35937	16424.4	44060.9	12234.5	18071.6	44497.2	19899.5	43354.5	56360.1	52340.6	50025	86205.1	61971.7	110653	117130	146627	512	517	1	2	8	2	8	8	2	8	1	8	2	8	2	8	8	8
A982924702	A9829247	2011	1	1	1	A982	2	49	#NULL!	4	4	2	7	11645.1	7384.01	#NULL!	9996.45	20637.9	6938.27	8548.42	#NULL!	10518.8	#NULL!	#NULL!	19291.5	23229.5	#NULL!	23702	#NULL!	#NULL!	#NULL!	512	517	1	2	8	2	8	8	2	8	1	8	2	8	2	8	8	8
A982924703	A9829247	2011	1	1	1	A982	1	24	#NULL!	4	4	4	7	11645.1	11936.6	#NULL!	#NULL!	49701.2	15782.7	23766.3	#NULL!	#NULL!	#NULL!	#NULL!	61806	#NULL!	#NULL!	#NULL!	#NULL!	#NULL!	#NULL!	512	517	1	2	8	8	8	8	2	8	1	8	1	1	2	8	8	8
A982924704	A9829247	2011	1	1	1	A982	2	22	#NULL!	4	4	3	3	11645.1	11087.9	22732.4	#NULL!	33078.4	14940.3	15006.7	#NULL!	#NULL!	25865.9	#NULL!	31429	#NULL!	64070.3	#NULL!	65158.7	#NULL!	#NULL!	512	517	1	1	2	8	8	8	2	8	1	8	2	8	1	2	1	1
A983918201	A9839182	2011	1	1	2	A983	1	57	#NULL!	4	4	4	1	2223.83	2511.22	5435.68	#NULL!	7087.98	#NULL!	#NULL!	#NULL!	#NULL!	#NULL!	#NULL!	#NULL!	#NULL!	12352.3	#NULL!	#NULL!	#NULL!	#NULL!	501	501	1	2	8	2	8	8	2	8	1	8	2	8	2	8	8	8
A983918202	A9839182	2011	1	1	2	A983	2	51	#NULL!	4	4	4	7	2223.83	2142.89	#NULL!	5428.2	6495.19	3106.78	3412.34	#NULL!	5640.05	#NULL!	#NULL!	8192.48	13127.9	#NULL!	13341.9	#NULL!	#NULL!	#NULL!	501	501	1	2	8	2	8	8	2	8	1	8	2	8	2	8	8	8
A983918203	A9839182	2011	1	1	2	A983	2	27	#NULL!	4	4	4	7	2223.83	4560.42	5558.79	#NULL!	11150.6	6467.87	6767.13	#NULL!	#NULL!	12830.8	#NULL!	17175.8	#NULL!	15348.6	#NULL!	31786.6	#NULL!	#NULL!	501	501	1	2	8	8	8	8	2	8	1	8	2	8	2	8	8	8
A983919002	A9839190	2011	1	1	2	A983	2	46	#NULL!	4	4	4	7	2223.83	8037.61	15069.7	7254.19	29952.8	10069.9	12406.8	13975.1	7633.28	19576.4	14633.8	27998.7	16857.1	43302	17200	46524.7	33495.4	35710.9	501	501	1	2	8	2	8	8	2	8	1	8	2	8	2	8	8	8
A983919401	A9839194	2011	1	1	2	A983	1	64	#NULL!	4	4	4	7	2223.83	1737.49	#NULL!	2256.2	4996.23	1986.82	1849.37	#NULL!	2528.79	#NULL!	#NULL!	4840.65	5816.74	#NULL!	6378.47	#NULL!	#NULL!	#NULL!	501	501	1	2	8	2	8	8	1	1	1	8	2	8	1	1	1	1
A983919402	A9839194	2011	1	1	2	A983	2	60	#NULL!	4	4	4	7	2223.83	1708.86	#NULL!	1844.33	4506.59	1805.44	1653.72	#NULL!	1927.63	#NULL!	#NULL!	3977.39	4305.18	#NULL!	4551.28	#NULL!	#NULL!	#NULL!	501	501	1	2	8	1	2	2	2	8	1	8	1	1	2	8	8	8
A983919403	A9839194	2011	1	1	2	A983	2	29	#NULL!	4	4	4	1	2223.83	4560.42	#NULL!	#NULL!	11150.6	4311.91	4511.42	#NULL!	#NULL!	#NULL!	#NULL!	11450.6	#NULL!	#NULL!	#NULL!	#NULL!	#NULL!	#NULL!	501	501	1	9	9	8	8	8	9	9	9	9	9	9	9	9	9	9
A983919602	A9839196	2011	1	1	2	A983	2	55	#NULL!	4	4	4	7	2223.83	3286.38	#NULL!	4397.53	10417.4	3096.38	3871.73	#NULL!	4428.03	#NULL!	#NULL!	9366.17	11255.4	#NULL!	11144.1	#NULL!	#NULL!	#NULL!	501	501	1	2	8	2	8	8	2	8	1	8	2	8	2	8	8	8
A983920001	A9839200	2011	1	1	2	A983	1	46	#NULL!	4	4	4	1	2223.83	3971.14	13039.3	#NULL!	#NULL!	#NULL!	#NULL!	#NULL!	#NULL!	#NULL!	#NULL!	#NULL!	#NULL!	#NULL!	#NULL!	#NULL!	#NULL!	#NULL!	501	501	1	9	9	9	9	9	9	9	9	9	9	9	9	9	9	9
A983920002	A9839200	2011	1	1	2	A983	2	46	#NULL!	4	4	4	7	2223.83	2679.2	#NULL!	7254.19	22464.6	#NULL!	#NULL!	#NULL!	#NULL!	#NULL!	#NULL!	#NULL!	16857.1	#NULL!	#NULL!	#NULL!	#NULL!	#NULL!	501	501	1	9	9	9	9	9	9	9	9	9	9	9	9	9	9	9
A983920501	A9839205	2011	1	1	2	A983	1	40	#NULL!	4	4	4	1	2223.83	4570.82	5525.32	5071.6	12654.2	5039.99	6349.65	7552.86	6633.47	6145.51	9302.21	16984.9	12587.5	10392.7	17848.1	12118.3	15752.8	19754.4	501	501	1	2	8	2	8	8	2	8	1	8	2	8	1	2	1	1
A983920502	A9839205	2011	1	1	2	A983	2	32	#NULL!	4	4	4	7	2223.83	2783.89	5318.64	#NULL!	7509.5	2960.86	3787.9	#NULL!	#NULL!	5574.44	#NULL!	7501.12	#NULL!	14208.8	#NULL!	14058.2	#NULL!	#NULL!	501	501	1	2	8	8	8	8	2	8	1	8	2	8	2	8	8	8
A983920901	A9839209	2011	1	1	2	A983	1	73	#NULL!	4	4	4	1	2223.83	2147.03	#NULL!	2756.97	3949.77	3206.3	1565.48	#NULL!	2876.75	#NULL!	#NULL!	3997.52	7404.42	#NULL!	7912.38	#NULL!	#NULL!	#NULL!	501	501	1	2	8	2	8	8	2	8	1	8	2	8	2	8	8	8
A983920902	A9839209	2011	1	1	2	A983	2	74	#NULL!	4	4	1	7	2223.83	1444.46	#NULL!	3336.35	4232.64	1387.86	1516.52	#NULL!	3481.39	#NULL!	#NULL!	3842.27	8913.89	#NULL!	8885.16	#NULL!	#NULL!	#NULL!	501	501	1	2	8	2	8	8	2	8	1	8	2	8	2	8	8	8
A983921002	A9839210	2011	1	1	2	A983	2	43	#NULL!	4	4	4	7	2223.83	5807.91	#NULL!	#NULL!	12523.2	4085.97	3983.61	#NULL!	#NULL!	#NULL!	#NULL!	11818	#NULL!	#NULL!	#NULL!	#NULL!	#NULL!	#NULL!	501	501	1	9	9	9	9	9	9	9	9	9	9	9	9	9	9	9
A983921004	A9839210	2011	1	1	2	A983	1	14	#NULL!	4	4	1	#NULL!	2223.83	3833.74	4003.33	#NULL!	9569.73	2623.07	3778.9	#NULL!	#NULL!	6767.05	#NULL!	8988.76	#NULL!	13425.7	#NULL!	14217	#NULL!	#NULL!	501	501	1	9	9	8	8	8	8	8	9	9	9	9	9	9	9	9
A983921301	A9839213	2011	1	1	2	A983	1	62	#NULL!	4	4	4	1	2223.83	1737.49	#NULL!	#NULL!	4996.23	1986.82	1849.37	#NULL!	#NULL!	#NULL!	#NULL!	4840.65	#NULL!	#NULL!	#NULL!	#NULL!	#NULL!	#NULL!	501	501	1	2	8	2	8	8	2	8	1	8	2	8	2	8	8	8
A983921302	A9839213	2011	1	1	2	A983	2	59	#NULL!	4	4	4	7	2223.83	1643.19	7629.71	4397.53	5208.68	1548.19	1935.86	10800.9	4428.03	7540.62	10816.8	4683.08	11255.4	20523.8	11144.1	20725.6	30409.5	30224	501	501	1	2	8	2	8	8	1	2	1	8	2	8	2	8	8	8
A983922001	A9839220	2011	1	1	2	A983	1	57	#NULL!	4	4	4	1	2223.83	2511.22	#NULL!	3182.19	7087.98	2954.76	2929.97	#NULL!	3679	#NULL!	#NULL!	6777.2	7665.03	#NULL!	9024.46	#NULL!	#NULL!	#NULL!	501	501	1	2	8	2	8	8	2	8	1	8	2	8	1	1	2	1
A983922002	A9839220	2011	1	1	2	A983	2	53	#NULL!	4	4	4	1	2223.83	2142.89	#NULL!	2714.1	6495.19	2071.19	2274.89	#NULL!	2820.03	#NULL!	#NULL!	5461.65	6563.94	#NULL!	6670.94	#NULL!	#NULL!	#NULL!	501	501	1	2	8	2	8	8	2	8	1	8	2	8	1	1	1	1
A983922003	A9839220	2011	1	1	2	A983	2	28	#NULL!	4	4	4	1	2223.83	4560.42	14823.4	#NULL!	11150.6	4311.91	4511.42	#NULL!	#NULL!	17107.8	#NULL!	11450.6	#NULL!	40929.6	#NULL!	42382.1	#NULL!	#NULL!	501	501	1	1	2	8	8	8	2	8	1	8	2	8	1	2	2	2
A983922004	A9839220	2011	1	1	2	A983	2	31	#NULL!	4	4	4	1	2223.83	2783.89	#NULL!	#NULL!	7509.5	2960.86	3787.9	#NULL!	#NULL!	#NULL!	#NULL!	7501.12	#NULL!	#NULL!	#NULL!	#NULL!	#NULL!	#NULL!	501	501	1	2	8	8	8	8	2	8	1	8	2	8	2	8	8	8
A983922202	A9839222	2011	1	1	2	A983	2	81	#NULL!	4	3	1	7	2223.83	3047.92	#NULL!	#NULL!	8465.28	3028.89	3033.03	#NULL!	#NULL!	#NULL!	#NULL!	7684.54	#NULL!	#NULL!	#NULL!	#NULL!	#NULL!	#NULL!	501	501	1	2	8	2	8	8	2	8	2	3	1	1	1	1	1	1
A983922401	A9839224	2011	1	1	2	A983	1	58	#NULL!	4	4	4	1	2223.83	2511.22	#NULL!	3182.19	7087.98	2954.76	2929.97	#NULL!	3679	#NULL!	#NULL!	6777.2	7665.03	#NULL!	9024.46	#NULL!	#NULL!	#NULL!	501	501	1	2	8	2	8	8	2	8	1	8	2	8	2	8	8	8
A983922402	A9839224	2011	1	1	2	A983	2	57	#NULL!	4	4	4	7	2223.83	1643.19	#NULL!	2198.77	5208.68	1548.19	1935.86	#NULL!	2214.01	#NULL!	#NULL!	4683.08	5627.72	#NULL!	5572.07	#NULL!	#NULL!	#NULL!	501	501	1	2	8	2	8	8	2	8	1	8	2	8	2	8	8	8
A983922404	A9839224	2011	1	1	2	A983	2	29	#NULL!	4	4	4	3	2223.83	4560.42	11117.6	#NULL!	11150.6	4311.91	4511.42	#NULL!	#NULL!	12830.8	#NULL!	11450.6	#NULL!	30697.2	#NULL!	31786.6	#NULL!	#NULL!	501	501	1	2	8	8	8	8	2	8	1	8	2	8	2	8	8	8
A983922701	A9839227	2011	1	1	2	A983	1	74	#NULL!	4	4	4	1	2223.83	2147.03	#NULL!	5513.93	3949.77	3206.3	1565.48	#NULL!	5753.5	#NULL!	#NULL!	3997.52	14808.8	#NULL!	15824.8	#NULL!	#NULL!	#NULL!	501	501	1	2	8	2	8	8	2	8	2	3	2	8	2	8	8	8
A983922702	A9839227	2011	1	1	2	A983	2	72	#NULL!	4	4	3	7	2223.83	1444.46	107472	#NULL!	4232.64	1387.86	1516.52	#NULL!	#NULL!	108215	#NULL!	3842.27	#NULL!	153558	#NULL!	139904	#NULL!	#NULL!	501	501	1	1	2	2	8	8	2	8	1	8	2	8	2	8	8	8
A983923301	A9839233	2011	1	1	2	A983	1	67	#NULL!	4	4	4	1	2223.83	1329.16	5176.42	2557.11	3501.73	1611.15	1716.33	8176.09	2787.11	5434.12	8529.24	3675.4	5603.04	11349	6080	12802.2	18748.4	19659.7	501	501	1	2	8	2	8	8	2	8	1	8	2	8	2	8	8	8
A983923302	A9839233	2011	1	1	2	A983	2	62	#NULL!	4	4	4	7	2223.83	1708.86	#NULL!	1844.33	4506.59	1805.44	1653.72	#NULL!	1927.63	#NULL!	#NULL!	3977.39	4305.18	#NULL!	4551.28	#NULL!	#NULL!	#NULL!	501	501	1	9	9	9	9	9	9	9	9	9	9	9	9	9	9	9
A983923402	A9839234	2011	1	1	2	A983	2	40	#NULL!	4	4	4	7	2223.83	5807.91	#NULL!	8099.26	14088.6	3064.48	4780.34	#NULL!	7795.37	#NULL!	#NULL!	13295.3	23958.3	#NULL!	22894.1	#NULL!	#NULL!	#NULL!	501	501	1	1	2	2	8	8	2	8	1	8	1	1	1	1	2	1
A983923403	A9839234	2011	1	1	2	A983	2	14	#NULL!	4	4	1	#NULL!	2223.83	5444.15	4552.3	#NULL!	11091.1	2892.08	4881.16	#NULL!	#NULL!	10658.9	#NULL!	10599.3	#NULL!	34435.4	#NULL!	36556.7	#NULL!	#NULL!	501	501	1	1	2	8	8	8	8	8	1	8	2	8	1	1	1	1
A983923601	A9839236	2011	1	1	2	A983	1	71	#NULL!	4	4	4	1	2223.83	2147.03	#NULL!	#NULL!	3949.77	3206.3	1565.48	#NULL!	#NULL!	#NULL!	#NULL!	3997.52	#NULL!	#NULL!	#NULL!	#NULL!	#NULL!	#NULL!	501	501	1	2	8	2	8	8	2	8	1	8	2	8	2	8	8	8
A983923602	A9839236	2011	1	1	2	A983	2	63	#NULL!	4	4	4	7	2223.83	1708.86	#NULL!	3688.65	4506.59	1805.44	1653.72	#NULL!	3855.26	#NULL!	#NULL!	3977.39	8610.35	#NULL!	9102.55	#NULL!	#NULL!	#NULL!	501	501	1	1	2	2	8	8	2	8	1	8	2	8	1	1	2	1
A983923901	A9839239	2011	1	1	2	A983	2	41	#NULL!	#NULL!	#NULL!	4	7	2223.83	2903.96	11186	4049.63	12523.2	4596.72	6373.78	15796.5	3897.69	19914	16081	17727.1	11979.1	55787.4	11447.1	58357.2	45921.2	48126.3	501	501	1	1	9	1	2	2	2	8	1	8	2	8	2	8	8	8
A983923902	A9839239	2011	1	1	2	A983	1	42	#NULL!	#NULL!	#NULL!	4	1	2223.83	4570.82	#NULL!	5071.6	16872.3	7559.99	12699.3	#NULL!	6633.47	#NULL!	#NULL!	33969.8	12587.5	#NULL!	17848.1	#NULL!	#NULL!	#NULL!	501	501	1	2	8	2	8	8	2	8	1	8	2	8	2	8	8	8
A983923903	A9839239	2011	1	1	2	A983	2	13	#NULL!	#NULL!	#NULL!	1	#NULL!	2223.83	2722.07	#NULL!	#NULL!	9858.76	#NULL!	#NULL!	#NULL!	#NULL!	#NULL!	#NULL!	#NULL!	#NULL!	#NULL!	#NULL!	#NULL!	#NULL!	#NULL!	501	501	1	2	8	8	8	8	8	8	1	8	2	8	2	8	8	8
A983924202	A9839242	2011	1	1	2	A983	2	78	#NULL!	4	3	3	7	2223.83	1523.96	#NULL!	3336.35	4232.64	1514.44	1516.52	#NULL!	3481.39	#NULL!	#NULL!	3842.27	8913.89	#NULL!	8885.16	#NULL!	#NULL!	#NULL!	501	501	1	2	8	1	2	2	2	8	1	8	1	1	2	8	8	8
A983924401	A9839244	2011	1	1	2	A983	1	40	#NULL!	4	4	4	1	2223.83	4570.82	#NULL!	5071.6	12654.2	#NULL!	#NULL!	#NULL!	#NULL!	#NULL!	#NULL!	#NULL!	12587.5	#NULL!	#NULL!	#NULL!	#NULL!	#NULL!	501	501	1	2	8	2	8	8	2	8	1	8	1	1	2	8	8	8
A983924402	A9839244	2011	1	1	2	A983	2	35	#NULL!	4	4	4	7	2223.83	2341.64	11286.3	#NULL!	6498.56	4914.41	3595.16	#NULL!	#NULL!	8358.47	#NULL!	9381.98	#NULL!	18861.2	#NULL!	19971.7	#NULL!	#NULL!	501	501	1	2	8	8	8	8	2	8	1	8	2	8	2	8	8	8
A983924403	A9839244	2011	1	1	2	A983	2	11	#NULL!	4	4	1	#NULL!	2223.83	2722.07	9104.59	#NULL!	7394.07	5784.16	4067.63	#NULL!	#NULL!	5329.45	#NULL!	10599.3	#NULL!	17217.7	#NULL!	18278.3	#NULL!	#NULL!	501	501	1	2	8	8	8	8	8	8	8	8	8	8	2	8	8	8
A983924404	A9839244	2011	1	1	2	A983	1	9	#NULL!	4	4	1	#NULL!	2223.83	1924.55	#NULL!	#NULL!	#NULL!	3520.96	3221.8	#NULL!	#NULL!	#NULL!	#NULL!	#NULL!	#NULL!	#NULL!	#NULL!	#NULL!	#NULL!	#NULL!	501	501	1	2	8	8	8	8	8	8	8	8	8	8	1	2	2	2
A983924405	A9839244	2011	1	1	2	A983	1	6	81	4	4	1	#NULL!	2223.83	1924.55	#NULL!	#NULL!	#NULL!	3520.96	3221.8	#NULL!	#NULL!	#NULL!	#NULL!	#NULL!	#NULL!	#NULL!	#NULL!	#NULL!	#NULL!	#NULL!	501	501	1	2	8	8	8	8	8	8	8	8	8	8	1	2	2	2
A983924802	A9839248	2011	1	1	2	A983	2	47	#NULL!	4	4	4	7	2223.83	2679.2	#NULL!	3627.1	7488.21	2517.47	3101.69	#NULL!	3816.64	#NULL!	#NULL!	6999.69	8428.56	#NULL!	8599.99	#NULL!	#NULL!	#NULL!	501	501	1	9	9	9	9	9	9	9	9	9	9	9	9	9	9	9
A983924803	A9839248	2011	1	1	2	A983	2	20	#NULL!	4	4	3	7	2223.83	4023.12	#NULL!	#NULL!	12002.1	5420.92	5445.02	#NULL!	#NULL!	#NULL!	#NULL!	11403.6	#NULL!	#NULL!	#NULL!	#NULL!	#NULL!	#NULL!	501	501	1	9	9	8	8	8	9	9	9	9	9	9	9	9	9	9
A983924804	A9839248	2011	1	1	2	A983	2	18	#NULL!	4	4	3	7	2223.83	3620.7	#NULL!	#NULL!	11615.9	3893.62	4840.15	#NULL!	#NULL!	#NULL!	#NULL!	12929	#NULL!	#NULL!	#NULL!	#NULL!	#NULL!	#NULL!	501	501	1	9	9	8	8	8	8	8	9	9	9	9	9	9	9	9
A984919801	A9849198	2011	1	1	1	A984	1	46	#NULL!	2	3	3	5	10587	11343.2	37245.7	17022.6	45665.4	#NULL!	#NULL!	23058.8	#NULL!	#NULL!	#NULL!	#NULL!	51846.7	89344.4	#NULL!	#NULL!	60697.7	#NULL!	512	517	1	2	8	2	8	8	2	8	1	8	2	8	1	2	1	1
A984919802	A9849198	2011	1	1	1	A984	2	38	#NULL!	2	3	3	3	10587	6688.68	#NULL!	#NULL!	18562.6	14037.6	16430.8	#NULL!	#NULL!	#NULL!	#NULL!	35731.8	#NULL!	#NULL!	#NULL!	#NULL!	#NULL!	#NULL!	512	517	1	2	8	8	8	8	2	8	1	8	2	8	2	8	8	8
A984919803	A9849198	2011	1	1	1	A984	1	17	#NULL!	2	3	2	7	10587	9703.22	33389.9	#NULL!	29606.1	#NULL!	#NULL!	#NULL!	#NULL!	#NULL!	#NULL!	#NULL!	#NULL!	56284.1	#NULL!	#NULL!	#NULL!	#NULL!	512	517	1	2	8	8	8	8	8	8	1	8	1	1	1	1	1	1
A984919804	A9849198	2011	1	1	1	A984	1	12	#NULL!	2	3	1	#NULL!	10587	5475.38	#NULL!	#NULL!	20501.3	11238.8	17270.5	#NULL!	#NULL!	#NULL!	#NULL!	38513.4	#NULL!	#NULL!	#NULL!	#NULL!	#NULL!	#NULL!	512	517	1	2	8	8	8	8	8	8	1	8	2	8	2	8	8	8
A984920301	A9849203	2011	1	1	1	A984	1	68	#NULL!	3	2	2	6	10587	5062.18	#NULL!	#NULL!	15003.6	4602.11	6536.72	#NULL!	#NULL!	#NULL!	#NULL!	13998	#NULL!	#NULL!	#NULL!	#NULL!	#NULL!	#NULL!	512	517	1	2	8	1	2	2	2	8	2	3	1	2	2	8	8	8
A984920302	A9849203	2011	1	1	1	A984	2	63	#NULL!	3	2	3	7	10587	6508.29	35172.7	15804.5	19309	5157.09	6298.28	37426.1	16518.3	35829.6	39003.1	15148.1	36892.1	86701	39001	87945.4	103535	104318	512	517	1	2	8	2	8	8	2	8	1	8	2	8	2	8	8	8
A984920303	A9849203	2011	1	1	1	A984	1	33	#NULL!	1	2	3	5	10587	13462.5	#NULL!	#NULL!	52707.3	10604.6	20572.1	#NULL!	#NULL!	#NULL!	#NULL!	59786.6	#NULL!	#NULL!	#NULL!	#NULL!	#NULL!	#NULL!	512	517	1	2	8	8	8	8	2	8	3	1	2	8	2	8	8	8
A984920602	A9849206	2011	1	1	1	A984	2	37	#NULL!	2	3	3	6	10587	6688.68	#NULL!	#NULL!	18562.6	7018.8	8215.41	#NULL!	#NULL!	#NULL!	#NULL!	17865.9	#NULL!	#NULL!	#NULL!	#NULL!	#NULL!	#NULL!	512	517	1	2	8	8	8	8	1	1	1	8	1	1	2	8	8	8
A984920603	A9849206	2011	1	1	1	A984	2	12	#NULL!	2	3	1	#NULL!	10587	7775.37	#NULL!	#NULL!	21120.5	8260.97	9295.07	#NULL!	#NULL!	#NULL!	#NULL!	20183.9	#NULL!	#NULL!	#NULL!	#NULL!	#NULL!	#NULL!	512	517	1	2	8	8	8	8	8	8	1	8	2	8	2	8	8	8
A984920604	A9849206	2011	1	1	1	A984	2	10	#NULL!	2	3	1	#NULL!	10587	7775.37	#NULL!	#NULL!	21120.5	8260.97	9295.07	#NULL!	#NULL!	#NULL!	#NULL!	20183.9	#NULL!	#NULL!	#NULL!	#NULL!	#NULL!	#NULL!	512	517	1	2	8	8	8	8	8	8	8	8	8	8	2	8	8	8
A984920605	A9849206	2011	1	1	1	A984	1	5	61	2	3	1	#NULL!	10587	5497.32	#NULL!	#NULL!	#NULL!	5028.65	7362.23	#NULL!	#NULL!	#NULL!	#NULL!	#NULL!	#NULL!	#NULL!	#NULL!	#NULL!	#NULL!	#NULL!	512	517	1	2	8	8	8	8	8	8	8	8	8	8	8	8	8	8
A984921101	A9849211	2011	1	1	1	A984	1	57	#NULL!	4	4	3	7	10587	7173.09	20702.1	9089.66	20246.2	8440	8369.21	27726.9	10508.8	22863.6	30622.6	19358.5	21894.5	47044.4	25777.6	50554.8	64292.4	68786.9	512	517	1	2	8	1	2	2	2	8	1	8	2	8	2	8	8	8
A984921102	A9849211	2011	1	1	1	A984	2	53	#NULL!	4	4	3	7	10587	6120.97	#NULL!	7752.6	18552.9	5916.17	6498.04	#NULL!	8055.16	#NULL!	#NULL!	15600.7	18749.3	#NULL!	19055	#NULL!	#NULL!	#NULL!	512	517	1	2	8	2	8	8	2	8	1	8	2	8	2	8	8	8
A984921301	A9849213	2011	1	1	1	A984	1	74	#NULL!	2	1	3	7	10587	6132.79	#NULL!	7875.03	11282.2	9158.51	4471.66	#NULL!	8217.18	#NULL!	#NULL!	11418.6	21150.1	#NULL!	22601	#NULL!	#NULL!	#NULL!	512	517	1	2	8	2	8	8	2	8	1	8	2	8	2	8	8	8
A984921302	A9849213	2011	1	1	1	A984	2	72	#NULL!	3	1	1	7	10587	4125.99	#NULL!	9530.01	12090.2	3964.29	4331.8	#NULL!	9944.3	#NULL!	#NULL!	10975.1	25461.8	#NULL!	25379.7	#NULL!	#NULL!	#NULL!	512	517	1	2	8	2	8	8	2	8	1	8	2	8	2	8	8	8
A984922002	A9849220	2011	1	1	1	A984	2	51	#NULL!	2	2	4	2	10587	6120.97	#NULL!	7752.6	18552.9	5916.17	6498.04	#NULL!	8055.16	#NULL!	#NULL!	15600.7	18749.3	#NULL!	19055	#NULL!	#NULL!	#NULL!	512	517	1	2	8	2	8	8	2	8	1	8	2	8	2	8	8	8
A984922003	A9849220	2011	1	1	1	A984	1	25	#NULL!	1	2	4	1	10587	14709.4	40843.1	#NULL!	45368.4	19549.1	22424	#NULL!	#NULL!	47820.2	#NULL!	51757.4	#NULL!	126128	#NULL!	132323	#NULL!	#NULL!	512	517	1	2	8	8	8	8	2	8	1	8	2	8	1	1	2	1
A984922004	A9849220	2011	1	1	1	A984	2	22	#NULL!	1	2	3	7	10587	11491.7	#NULL!	#NULL!	34283	15484.4	15553.2	#NULL!	#NULL!	#NULL!	#NULL!	32573.5	#NULL!	#NULL!	#NULL!	#NULL!	#NULL!	#NULL!	512	517	1	2	8	8	8	8	2	8	1	8	1	1	2	8	8	8
A984922202	A9849222	2011	1	1	1	A984	2	38	#NULL!	1	2	3	7	10587	13377.4	32238.5	#NULL!	37125.1	#NULL!	#NULL!	#NULL!	#NULL!	#NULL!	#NULL!	#NULL!	#NULL!	71833.7	#NULL!	#NULL!	#NULL!	#NULL!	512	517	1	2	8	8	8	8	2	8	1	8	2	8	2	8	8	8
A984922203	A9849222	2011	1	1	1	A984	2	9	#NULL!	1	2	1	#NULL!	10587	10434.1	#NULL!	#NULL!	#NULL!	#NULL!	#NULL!	#NULL!	#NULL!	#NULL!	#NULL!	#NULL!	#NULL!	#NULL!	#NULL!	#NULL!	#NULL!	#NULL!	512	517	1	2	8	8	8	8	8	8	8	8	8	8	2	8	8	8
A984922204	A9849222	2011	1	1	1	A984	2	7	#NULL!	1	2	1	#NULL!	10587	10434.1	#NULL!	#NULL!	#NULL!	#NULL!	#NULL!	#NULL!	#NULL!	#NULL!	#NULL!	#NULL!	#NULL!	#NULL!	#NULL!	#NULL!	#NULL!	#NULL!	512	517	1	2	8	8	8	8	8	8	8	8	8	8	2	8	8	8
A984922401	A9849224	2011	1	1	1	A984	1	84	#NULL!	3	2	#NULL!	#NULL!	10587	4197.3	#NULL!	#NULL!	#NULL!	4123.85	4471.66	#NULL!	#NULL!	#NULL!	#NULL!	#NULL!	#NULL!	#NULL!	#NULL!	#NULL!	#NULL!	#NULL!	512	517	1	2	8	1	1	1	2	8	3	1	1	2	1	1	1	1
A984922402	A9849224	2011	1	1	1	A984	1	61	#NULL!	2	2	1	3	10587	4962.99	12989.7	19333.9	21406.9	5675.17	5282.56	37846.5	21669.8	13303.2	41955.8	20740.4	49845.1	34933.5	54658.6	36113.7	94906.5	97534.4	512	517	1	2	8	2	8	8	2	8	1	8	1	1	2	8	8	8
A984922403	A9849224	2011	1	1	1	A984	2	57	#NULL!	2	2	3	1	10587	4693.63	16345.2	#NULL!	22317.2	4422.27	5529.63	#NULL!	#NULL!	16154.4	#NULL!	20065.2	#NULL!	43968.3	#NULL!	44400.6	#NULL!	#NULL!	512	517	1	2	8	2	8	8	2	8	1	8	2	8	2	8	8	8
A984922701	A9849227	2011	1	1	1	A984	1	30	#NULL!	1	2	3	1	10587	10096.9	37750.7	#NULL!	44878.2	#NULL!	#NULL!	#NULL!	#NULL!	#NULL!	#NULL!	#NULL!	#NULL!	114752	#NULL!	#NULL!	#NULL!	#NULL!	512	517	1	2	8	8	8	8	2	8	1	8	2	8	2	8	8	8
A984922702	A9849227	2011	1	1	1	A984	2	30	#NULL!	1	2	4	2	10587	7951.94	#NULL!	#NULL!	21450.2	16914.9	14426.4	#NULL!	#NULL!	#NULL!	#NULL!	42852.6	#NULL!	#NULL!	#NULL!	#NULL!	#NULL!	#NULL!	512	517	1	2	8	8	8	8	2	8	1	8	1	1	1	1	1	1
A984922703	A9849227	2011	1	1	1	A984	2	6	76	2	2	1	#NULL!	10587	5217.07	#NULL!	#NULL!	#NULL!	11355.4	9527.49	#NULL!	#NULL!	#NULL!	#NULL!	#NULL!	#NULL!	#NULL!	#NULL!	#NULL!	#NULL!	#NULL!	512	517	1	2	8	8	8	8	8	8	8	8	8	8	2	8	8	8
A984922704	A9849227	2011	1	1	1	A984	2	2	35	2	2	1	#NULL!	10587	4195.49	#NULL!	#NULL!	#NULL!	8056.61	8570.81	#NULL!	#NULL!	#NULL!	#NULL!	#NULL!	#NULL!	#NULL!	#NULL!	#NULL!	#NULL!	#NULL!	512	517	1	8	8	8	8	8	8	8	8	8	8	8	8	8	8	8
A984923801	A9849238	2011	1	1	1	A984	1	49	#NULL!	1	2	4	6	10587	11343.2	#NULL!	17022.6	45665.4	12680.1	18729.7	#NULL!	20624.2	#NULL!	#NULL!	54246.7	51846.7	#NULL!	64228.5	#NULL!	#NULL!	#NULL!	512	517	1	2	8	2	8	8	2	8	1	8	1	1	2	8	8	8
A984923802	A9849238	2011	1	1	1	A984	1	16	#NULL!	1	2	2	7	10587	9703.22	#NULL!	#NULL!	29606.1	10850.3	15648.6	#NULL!	#NULL!	#NULL!	#NULL!	32886.1	#NULL!	#NULL!	#NULL!	#NULL!	#NULL!	#NULL!	512	517	1	2	8	8	8	8	8	8	1	8	2	8	2	8	8	8
A984923903	A9849239	2011	1	1	1	A984	2	15	#NULL!	1	1	2	#NULL!	10587	17908.8	27373.2	#NULL!	33179.9	18801.6	19309.2	#NULL!	#NULL!	51568.1	#NULL!	52971	#NULL!	93881.4	#NULL!	108001	#NULL!	#NULL!	512	517	1	2	8	8	8	8	8	8	1	8	2	8	2	8	8	8
A984923904	A9849239	2011	1	1	1	A984	1	13	#NULL!	1	1	1	#NULL!	10587	10950.8	#NULL!	#NULL!	20501.3	#NULL!	#NULL!	#NULL!	#NULL!	#NULL!	#NULL!	#NULL!	#NULL!	#NULL!	#NULL!	#NULL!	#NULL!	#NULL!	512	517	1	2	8	8	8	8	8	8	1	8	2	8	1	2	1	1
A984923905	A9849239	2011	1	1	1	A984	2	75	#NULL!	2	1	2	7	10587	8706.13	#NULL!	#NULL!	12090.2	8651.76	8663.6	#NULL!	#NULL!	#NULL!	#NULL!	21950.2	#NULL!	#NULL!	#NULL!	#NULL!	#NULL!	#NULL!	512	517	1	2	8	2	8	8	1	2	1	8	2	8	2	8	8	8
A984925101	A9849251	2011	1	1	1	A984	2	34	#NULL!	3	3	4	1	10587	7951.94	#NULL!	#NULL!	21450.2	#NULL!	#NULL!	#NULL!	#NULL!	#NULL!	#NULL!	#NULL!	#NULL!	#NULL!	#NULL!	#NULL!	#NULL!	#NULL!	512	517	1	2	8	8	8	8	2	8	1	8	2	8	2	8	8	8
A985918601	A9859186	2011	1	1	2	A985	1	56	#NULL!	3	3	4	1	2340.87	2511.22	#NULL!	4773.29	7087.98	3939.67	3906.63	#NULL!	5518.5	#NULL!	#NULL!	9036.27	11497.5	#NULL!	13536.7	#NULL!	#NULL!	#NULL!	501	501	1	2	8	2	8	8	2	8	2	3	1	2	2	8	8	8
A985918602	A9859186	2011	1	1	2	A985	2	51	#NULL!	3	3	3	2	2340.87	2142.89	#NULL!	4071.15	6495.19	2761.58	3033.19	#NULL!	4230.04	#NULL!	#NULL!	7282.2	9845.91	#NULL!	10006.4	#NULL!	#NULL!	#NULL!	501	501	1	2	8	2	8	8	2	8	1	8	2	8	2	8	8	8
A985918604	A9859186	2011	1	1	2	A985	2	77	#NULL!	4	3	1	7	2340.87	1523.96	#NULL!	#NULL!	4232.64	2019.26	2022.02	#NULL!	#NULL!	#NULL!	#NULL!	5123.03	#NULL!	#NULL!	#NULL!	#NULL!	#NULL!	#NULL!	501	501	1	2	8	2	8	8	1	2	2	3	1	2	2	8	8	8
A985919101	A9859191	2011	1	1	2	A985	2	53	#NULL!	2	2	4	7	2340.87	2857.18	#NULL!	2714.1	6495.19	2071.19	3033.19	#NULL!	2820.03	#NULL!	#NULL!	7282.2	6563.94	#NULL!	6670.94	#NULL!	#NULL!	#NULL!	501	501	1	2	8	2	8	8	2	8	2	3	2	8	2	8	8	8
A985919102	A9859191	2011	1	1	2	A985	1	58	#NULL!	2	2	4	2	2340.87	3348.3	#NULL!	3182.19	7087.98	2954.76	3906.63	#NULL!	3679	#NULL!	#NULL!	9036.27	7665.03	#NULL!	9024.46	#NULL!	#NULL!	#NULL!	501	501	1	2	8	2	8	8	2	8	1	8	2	8	2	8	8	8
A985919104	A9859191	2011	1	1	2	A985	2	24	#NULL!	2	2	4	2	2340.87	5364.16	#NULL!	#NULL!	12002.1	5420.92	7260.02	#NULL!	#NULL!	#NULL!	#NULL!	15204.8	#NULL!	#NULL!	#NULL!	#NULL!	#NULL!	#NULL!	501	501	1	2	8	8	8	8	2	8	1	8	2	8	2	8	8	8
A985919301	A9859193	2011	1	1	2	A985	1	40	#NULL!	4	4	4	1	2340.87	4570.82	11050.6	5071.6	12654.2	5039.99	6349.65	7552.86	6633.47	12291	9302.21	16984.9	12587.5	20785.5	17848.1	24236.5	15752.8	19754.4	501	501	1	2	8	2	8	8	2	8	1	8	2	8	2	8	8	8
A985919302	A9859193	2011	1	1	2	A985	2	33	#NULL!	4	4	4	7	2340.87	2783.89	#NULL!	#NULL!	7509.5	2960.86	3787.9	#NULL!	#NULL!	#NULL!	#NULL!	7501.12	#NULL!	#NULL!	#NULL!	#NULL!	#NULL!	#NULL!	501	501	1	1	1	8	8	8	2	8	1	8	2	8	1	2	1	1
A985919303	A9859193	2011	1	1	2	A985	2	5	63	4	4	1	#NULL!	2340.87	1826.44	#NULL!	#NULL!	#NULL!	1987.71	2501.6	#NULL!	#NULL!	#NULL!	#NULL!	#NULL!	#NULL!	#NULL!	#NULL!	#NULL!	#NULL!	#NULL!	501	501	1	2	8	8	8	8	8	8	8	8	8	8	8	8	8	8
A985919304	A9859193	2011	1	1	2	A985	2	2	28	4	4	1	#NULL!	2340.87	1468.8	#NULL!	#NULL!	#NULL!	1410.27	2250.41	#NULL!	#NULL!	#NULL!	#NULL!	#NULL!	#NULL!	#NULL!	#NULL!	#NULL!	#NULL!	#NULL!	501	501	1	8	8	8	8	8	8	8	8	8	8	8	8	8	8	8
A985919305	A9859193	2011	1	1	2	A985	2	59	#NULL!	4	4	2	3	2340.87	1643.19	7629.71	2198.77	5208.68	1548.19	1935.86	5400.46	2214.01	7540.62	5408.42	4683.08	5627.72	20523.8	5572.07	20725.6	15204.7	15112	501	501	1	2	8	2	8	8	2	8	1	8	2	8	2	8	8	8
A985919306	A9859193	2011	1	1	2	A985	2	37	#NULL!	4	4	4	2	2340.87	2341.64	#NULL!	#NULL!	6498.56	2457.21	2876.13	#NULL!	#NULL!	#NULL!	#NULL!	6254.65	#NULL!	#NULL!	#NULL!	#NULL!	#NULL!	#NULL!	501	501	1	2	8	8	8	8	2	8	1	8	2	8	2	8	8	8
A985919701	A9859197	2011	1	1	2	A985	1	55	#NULL!	3	4	4	1	2340.87	2511.22	#NULL!	6364.39	7087.98	2954.76	2929.97	#NULL!	7358.01	#NULL!	#NULL!	6777.2	15330.1	#NULL!	18048.9	#NULL!	#NULL!	#NULL!	501	501	1	2	8	2	8	8	2	8	1	8	2	8	2	8	8	8
A985919702	A9859197	2011	1	1	2	A985	2	52	#NULL!	4	4	4	7	2340.87	2142.89	#NULL!	#NULL!	6495.19	2071.19	2274.89	#NULL!	#NULL!	#NULL!	#NULL!	5461.65	#NULL!	#NULL!	#NULL!	#NULL!	#NULL!	#NULL!	501	501	1	2	8	2	8	8	2	8	2	3	2	8	2	8	8	8
A985919703	A9859197	2011	1	1	2	A985	2	28	#NULL!	4	4	4	7	2340.87	4560.42	14823.4	#NULL!	11150.6	4311.91	4511.42	#NULL!	#NULL!	17107.8	#NULL!	11450.6	#NULL!	40929.6	#NULL!	42382.1	#NULL!	#NULL!	501	501	1	2	8	8	8	8	2	8	2	3	2	8	1	2	1	1
A985919704	A9859197	2011	1	1	2	A985	1	25	#NULL!	4	4	3	6	2340.87	5149.62	#NULL!	#NULL!	15883	6915.62	8931.93	#NULL!	#NULL!	#NULL!	#NULL!	18119.7	#NULL!	#NULL!	#NULL!	#NULL!	#NULL!	#NULL!	501	501	1	1	2	8	8	8	2	8	1	8	1	2	1	1	1	2
A985920102	A9859201	2011	1	1	2	A985	2	46	#NULL!	3	3	4	1	2340.87	4018.81	15069.7	#NULL!	7488.21	3356.63	4135.59	#NULL!	#NULL!	9788.2	#NULL!	9332.92	#NULL!	21651	#NULL!	23262.3	#NULL!	#NULL!	501	501	1	2	8	2	8	8	2	8	1	8	2	8	2	8	8	8
A985920103	A9859201	2011	1	1	2	A985	1	19	#NULL!	3	3	3	7	2340.87	5095.49	#NULL!	#NULL!	10364.8	5064.75	7304.53	#NULL!	#NULL!	#NULL!	#NULL!	15350.8	#NULL!	#NULL!	#NULL!	#NULL!	#NULL!	#NULL!	501	501	1	1	2	8	8	8	2	8	1	8	1	2	2	8	8	8
A985920104	A9859201	2011	1	1	2	A985	1	15	#NULL!	3	3	2	7	2340.87	5095.49	17534.2	#NULL!	10364.8	5064.75	7304.53	#NULL!	#NULL!	11001.6	#NULL!	15350.8	#NULL!	19704.5	#NULL!	24346.1	#NULL!	#NULL!	501	501	1	1	2	8	8	8	8	8	1	8	2	8	2	8	8	8
A985920801	A9859208	2011	1	1	2	A985	1	46	#NULL!	3	4	4	1	2340.87	7942.28	13039.3	11918.8	31973.9	8878.32	19671.2	16145.3	14440.6	15730.7	20449.6	37982.4	36302	31278.5	44971.5	40149.2	42499.3	53201.9	501	501	1	2	8	2	8	8	2	8	1	8	2	8	2	8	8	8
A985921101	A9859211	2011	1	1	2	A985	1	37	#NULL!	2	3	4	5	2340.87	4071.02	21385.7	#NULL!	10236.2	4082.01	5969.62	#NULL!	#NULL!	27737.4	#NULL!	12179.3	#NULL!	51723.4	#NULL!	68985.8	#NULL!	#NULL!	501	501	1	2	8	8	8	8	2	8	1	8	2	8	2	8	8	8
A985921102	A9859211	2011	1	1	2	A985	2	33	#NULL!	2	3	4	3	2340.87	2783.89	#NULL!	#NULL!	7509.5	2960.86	3787.9	#NULL!	#NULL!	#NULL!	#NULL!	7501.12	#NULL!	#NULL!	#NULL!	#NULL!	#NULL!	#NULL!	501	501	1	2	8	8	8	8	2	8	1	8	1	2	2	8	8	8
A985921103	A9859211	2011	1	1	2	A985	2	8	#NULL!	2	3	1	#NULL!	2340.87	1826.44	#NULL!	#NULL!	#NULL!	1987.71	2501.6	#NULL!	#NULL!	#NULL!	#NULL!	#NULL!	#NULL!	#NULL!	#NULL!	#NULL!	#NULL!	#NULL!	501	501	1	1	2	8	8	8	8	8	8	8	8	8	1	1	1	1
A985921104	A9859211	2011	1	1	2	A985	1	5	62	2	3	1	#NULL!	2340.87	1924.55	#NULL!	#NULL!	#NULL!	1760.48	2577.44	#NULL!	#NULL!	#NULL!	#NULL!	#NULL!	#NULL!	#NULL!	#NULL!	#NULL!	#NULL!	#NULL!	501	501	1	2	8	8	8	8	8	8	8	8	8	8	8	8	8	8
A985921105	A9859211	2011	1	1	2	A985	1	67	#NULL!	3	3	3	5	2340.87	1329.16	#NULL!	#NULL!	3501.73	1611.15	1716.33	#NULL!	#NULL!	#NULL!	#NULL!	3675.4	#NULL!	#NULL!	#NULL!	#NULL!	#NULL!	#NULL!	501	501	1	2	8	2	8	8	2	8	1	8	2	8	2	8	8	8
A985921106	A9859211	2011	1	1	2	A985	2	57	#NULL!	2	3	2	5	2340.87	1643.19	#NULL!	4397.53	5208.68	1548.19	1935.86	#NULL!	4428.03	#NULL!	#NULL!	4683.08	11255.4	#NULL!	11144.1	#NULL!	#NULL!	#NULL!	501	501	1	2	8	1	2	2	2	8	1	8	1	1	2	8	8	8
A985921402	A9859214	2011	1	1	2	A985	2	50	#NULL!	4	4	4	7	2340.87	2142.89	#NULL!	2714.1	6495.19	2071.19	2274.89	#NULL!	2820.03	#NULL!	#NULL!	5461.65	6563.94	#NULL!	6670.94	#NULL!	#NULL!	#NULL!	501	501	1	2	8	1	1	2	2	8	1	8	2	8	2	8	8	8
A985921403	A9859214	2011	1	1	2	A985	1	24	#NULL!	4	4	3	7	2340.87	4331.06	#NULL!	#NULL!	18033.5	5726.56	8753.52	#NULL!	#NULL!	#NULL!	#NULL!	22425.6	#NULL!	#NULL!	#NULL!	#NULL!	#NULL!	#NULL!	501	501	1	1	2	8	8	8	2	8	1	8	2	8	2	8	8	8
A985921404	A9859214	2011	1	1	2	A985	2	22	#NULL!	4	4	3	7	2340.87	4023.12	12372.3	#NULL!	12002.1	5420.92	5445.02	#NULL!	#NULL!	14077.7	#NULL!	11403.6	#NULL!	34870.8	#NULL!	35463.1	#NULL!	#NULL!	501	501	1	2	8	8	8	8	1	2	1	8	3	8	2	8	8	8
A985921701	A9859217	2011	1	1	2	A985	1	67	#NULL!	4	3	4	7	2340.87	1329.16	7764.64	2557.11	3501.73	1611.15	1716.33	8176.09	2787.11	8151.19	8529.24	3675.4	5603.04	17023.5	6080	19203.3	18748.4	19659.7	501	501	1	2	8	2	8	8	2	8	1	8	2	8	2	8	8	8
A985921702	A9859217	2011	1	1	2	A985	2	49	#NULL!	3	3	4	1	2340.87	2679.2	#NULL!	3627.1	7488.21	2517.47	3101.69	#NULL!	3816.64	#NULL!	#NULL!	6999.69	8428.56	#NULL!	8599.99	#NULL!	#NULL!	#NULL!	501	501	1	2	8	2	8	8	2	8	1	8	2	8	2	8	8	8
A985921703	A9859217	2011	1	1	2	A985	2	39	#NULL!	3	3	4	1	2340.87	2341.64	#NULL!	#NULL!	6498.56	2457.21	2876.13	#NULL!	#NULL!	#NULL!	#NULL!	6254.65	#NULL!	#NULL!	#NULL!	#NULL!	#NULL!	#NULL!	501	501	1	1	2	8	8	8	2	8	1	8	1	1	1	1	1	1
A985922001	A9859220	2011	1	1	2	A985	1	51	#NULL!	2	3	3	5	2340.87	3466.82	10395.7	4173.65	11028.3	4021.54	4431.51	20878	5051.15	11239.8	24202.4	10491.2	12042.3	24809.4	12986.4	24613.4	52780.2	54717.5	501	501	1	2	8	1	3	2	2	8	1	8	1	2	2	8	8	8
A985922002	A9859220	2011	1	1	2	A985	2	53	#NULL!	2	3	3	7	2340.87	2142.89	#NULL!	2714.1	6495.19	2071.19	2274.89	#NULL!	2820.03	#NULL!	#NULL!	5461.65	6563.94	#NULL!	6670.94	#NULL!	#NULL!	#NULL!	501	501	1	2	8	2	8	8	2	8	1	8	2	8	2	8	8	8
A985922003	A9859220	2011	1	1	2	A985	1	24	#NULL!	2	3	3	1	2340.87	4331.06	9794.31	#NULL!	18033.5	5726.56	8753.52	#NULL!	#NULL!	11512.1	#NULL!	22425.6	#NULL!	21038.6	#NULL!	25378.6	#NULL!	#NULL!	501	501	1	2	8	8	8	8	2	8	1	8	2	8	2	8	8	8
A985922004	A9859220	2011	1	1	2	A985	2	48	#NULL!	2	3	4	7	2340.87	2679.2	#NULL!	3627.1	7488.21	2517.47	3101.69	#NULL!	3816.64	#NULL!	#NULL!	6999.69	8428.56	#NULL!	8599.99	#NULL!	#NULL!	#NULL!	501	501	1	1	2	1	2	2	2	8	1	8	2	8	2	8	8	8
A985922101	A9859221	2011	1	1	2	A985	2	35	#NULL!	4	4	4	7	2340.87	2341.64	#NULL!	#NULL!	6498.56	2457.21	2876.13	#NULL!	#NULL!	#NULL!	#NULL!	6254.65	#NULL!	#NULL!	#NULL!	#NULL!	#NULL!	#NULL!	501	501	1	1	2	8	8	8	2	8	1	8	2	8	2	8	8	8
A985922102	A9859221	2011	1	1	2	A985	1	37	#NULL!	4	4	4	2	2340.87	4071.02	#NULL!	#NULL!	10236.2	4082.01	5969.62	#NULL!	#NULL!	#NULL!	#NULL!	12179.3	#NULL!	#NULL!	#NULL!	#NULL!	#NULL!	#NULL!	501	501	1	2	8	8	8	8	2	8	1	8	2	8	2	8	8	8
A985922103	A9859221	2011	1	1	2	A985	1	7	#NULL!	4	4	1	#NULL!	2340.87	1924.55	#NULL!	#NULL!	#NULL!	1760.48	2577.44	#NULL!	#NULL!	#NULL!	#NULL!	#NULL!	#NULL!	#NULL!	#NULL!	#NULL!	#NULL!	#NULL!	501	501	1	1	2	8	8	8	8	8	8	8	8	8	2	8	8	8
A985922104	A9859221	2011	1	1	2	A985	1	3	43	4	4	1	#NULL!	2340.87	1580.11	#NULL!	#NULL!	#NULL!	1562.02	2219.09	#NULL!	#NULL!	#NULL!	#NULL!	#NULL!	#NULL!	#NULL!	#NULL!	#NULL!	#NULL!	#NULL!	501	501	1	8	8	8	8	8	8	8	8	8	8	8	8	8	8	8
A985922801	A9859228	2011	1	1	2	A985	1	71	#NULL!	2	1	1	7	2340.87	2147.03	#NULL!	#NULL!	3949.77	3206.3	1565.48	#NULL!	#NULL!	#NULL!	#NULL!	3997.52	#NULL!	#NULL!	#NULL!	#NULL!	#NULL!	#NULL!	501	501	1	2	8	2	8	8	2	8	1	8	2	8	2	8	8	8
A985922802	A9859228	2011	1	1	2	A985	2	64	#NULL!	1	1	1	7	2340.87	1708.86	#NULL!	3688.65	4506.59	1805.44	1653.72	#NULL!	3855.26	#NULL!	#NULL!	3977.39	8610.35	#NULL!	9102.55	#NULL!	#NULL!	#NULL!	501	501	1	2	8	2	8	8	2	8	1	8	2	8	2	8	8	8
A985922901	A9859229	2011	1	1	2	A985	1	58	#NULL!	2	3	3	3	2340.87	2511.22	#NULL!	3182.19	7087.98	2954.76	2929.97	#NULL!	3679	#NULL!	#NULL!	6777.2	7665.03	#NULL!	9024.46	#NULL!	#NULL!	#NULL!	501	501	1	2	8	2	8	8	2	8	1	8	2	8	2	8	8	8
A985922902	A9859229	2011	1	1	2	A985	2	50	#NULL!	2	3	2	3	2340.87	2142.89	#NULL!	2714.1	6495.19	2071.19	2274.89	#NULL!	2820.03	#NULL!	#NULL!	5461.65	6563.94	#NULL!	6670.94	#NULL!	#NULL!	#NULL!	501	501	1	2	8	2	8	8	2	8	1	8	2	8	2	8	8	8
A985923502	A9859235	2011	1	1	2	A985	2	39	#NULL!	3	3	4	3	2340.87	4683.27	#NULL!	#NULL!	8664.74	3685.81	3834.84	#NULL!	#NULL!	#NULL!	#NULL!	8339.54	#NULL!	#NULL!	#NULL!	#NULL!	#NULL!	#NULL!	501	501	1	1	2	8	8	8	2	8	1	8	2	8	1	1	1	1
A985923503	A9859235	2011	1	1	2	A985	1	13	#NULL!	3	3	1	#NULL!	2340.87	3833.74	8006.65	#NULL!	9569.73	2950.95	4030.82	#NULL!	#NULL!	13534.1	#NULL!	8988.76	#NULL!	26851.4	#NULL!	28433.9	#NULL!	#NULL!	501	501	1	2	8	8	8	8	8	8	1	8	2	8	2	8	8	8
A985923504	A9859235	2011	1	1	2	A985	1	11	#NULL!	3	3	1	#NULL!	2340.87	3833.74	#NULL!	#NULL!	9569.73	2950.95	4030.82	#NULL!	#NULL!	#NULL!	#NULL!	8988.76	#NULL!	#NULL!	#NULL!	#NULL!	#NULL!	#NULL!	501	501	1	1	2	8	8	8	8	8	8	8	8	8	2	8	8	8
A985923801	A9859238	2011	1	1	2	A985	1	34	#NULL!	2	3	4	2	2340.87	3534.8	#NULL!	#NULL!	15711.4	3712.57	7161.51	#NULL!	#NULL!	#NULL!	#NULL!	20748.2	#NULL!	#NULL!	#NULL!	#NULL!	#NULL!	#NULL!	501	501	1	2	8	8	8	8	2	8	1	8	2	8	2	8	8	8
A985923802	A9859238	2011	1	1	2	A985	2	36	#NULL!	2	3	4	7	2340.87	2341.64	11286.3	#NULL!	6498.56	2457.21	2876.13	#NULL!	#NULL!	11144.6	#NULL!	6254.65	#NULL!	25148.2	#NULL!	26628.9	#NULL!	#NULL!	501	501	1	1	2	8	8	8	2	8	1	8	1	1	2	8	8	8
A985923803	A9859238	2011	1	1	2	A985	1	4	54	3	3	1	#NULL!	2340.87	1580.11	#NULL!	#NULL!	#NULL!	1562.02	2219.09	#NULL!	#NULL!	#NULL!	#NULL!	#NULL!	#NULL!	#NULL!	#NULL!	#NULL!	#NULL!	#NULL!	501	501	1	1	2	8	8	8	8	8	8	8	8	8	8	8	8	8
A985924201	A9859242	2011	1	1	2	A985	1	59	#NULL!	3	4	3	1	2340.87	3766.84	#NULL!	3182.19	7087.98	#NULL!	#NULL!	#NULL!	#NULL!	#NULL!	#NULL!	#NULL!	7665.03	#NULL!	#NULL!	#NULL!	#NULL!	#NULL!	501	501	1	2	8	2	8	8	1	2	1	8	2	8	2	8	8	8
A985924202	A9859242	2011	1	1	2	A985	2	55	#NULL!	3	4	3	7	2340.87	2464.78	#NULL!	2198.77	5208.68	#NULL!	#NULL!	#NULL!	#NULL!	#NULL!	#NULL!	#NULL!	5627.72	#NULL!	#NULL!	#NULL!	#NULL!	#NULL!	501	501	1	1	2	1	1	2	1	1	1	8	1	2	1	1	2	2
A985924301	A9859243	2011	1	1	2	A985	1	36	#NULL!	3	3	4	7	2340.87	4071.02	#NULL!	#NULL!	10236.2	4082.01	11939.2	#NULL!	#NULL!	#NULL!	#NULL!	12179.3	#NULL!	#NULL!	#NULL!	#NULL!	#NULL!	#NULL!	501	501	1	2	8	8	8	8	2	8	1	8	2	8	2	8	8	8
A985924302	A9859243	2011	1	1	2	A985	2	38	#NULL!	3	3	4	2	2340.87	2341.64	#NULL!	#NULL!	6498.56	2457.21	5752.25	#NULL!	#NULL!	#NULL!	#NULL!	6254.65	#NULL!	#NULL!	#NULL!	#NULL!	#NULL!	#NULL!	501	501	1	2	8	8	8	8	2	8	1	8	2	8	2	8	8	8
A985924801	A9859248	2011	1	1	2	A985	1	37	#NULL!	4	4	4	2	2340.87	4071.02	#NULL!	#NULL!	10236.2	4082.01	5969.62	#NULL!	#NULL!	#NULL!	#NULL!	12179.3	#NULL!	#NULL!	#NULL!	#NULL!	#NULL!	#NULL!	501	501	1	2	8	8	8	8	2	8	1	8	2	8	2	8	8	8
A985924802	A9859248	2011	1	1	2	A985	2	37	#NULL!	4	4	4	7	2340.87	2341.64	#NULL!	#NULL!	6498.56	2457.21	2876.13	#NULL!	#NULL!	#NULL!	#NULL!	6254.65	#NULL!	#NULL!	#NULL!	#NULL!	#NULL!	#NULL!	501	501	1	1	2	8	8	8	2	8	1	8	2	8	1	1	2	2
A985924803	A9859248	2011	1	1	2	A985	2	8	#NULL!	4	4	1	#NULL!	2340.87	1826.44	#NULL!	#NULL!	#NULL!	1987.71	2501.6	#NULL!	#NULL!	#NULL!	#NULL!	#NULL!	#NULL!	#NULL!	#NULL!	#NULL!	#NULL!	#NULL!	501	501	1	1	2	8	8	8	8	8	8	8	8	8	1	1	1	1
A985924804	A9859248	2011	1	1	2	A985	1	2	30	4	4	1	#NULL!	2340.87	1580.11	#NULL!	#NULL!	#NULL!	1562.02	2219.09	#NULL!	#NULL!	#NULL!	#NULL!	#NULL!	#NULL!	#NULL!	#NULL!	#NULL!	#NULL!	#NULL!	501	501	1	8	8	8	8	8	8	8	8	8	8	8	8	8	8	8
A985925502	A9859255	2011	1	1	2	A985	1	74	#NULL!	3	2	#NULL!	#NULL!	2340.87	3220.54	#NULL!	#NULL!	#NULL!	4809.45	2348.22	#NULL!	#NULL!	#NULL!	#NULL!	#NULL!	#NULL!	#NULL!	#NULL!	#NULL!	#NULL!	#NULL!	501	501	1	2	8	2	8	8	2	8	1	8	1	1	2	8	8	8
A985925503	A9859255	2011	1	1	2	A985	2	68	#NULL!	3	2	3	7	2340.87	2420.94	9841.87	5505.88	8295.22	3506.92	2281.82	16722.2	6234.64	10561.4	17714.3	11858.6	14040.6	23580.3	15873.8	25303.9	36961.9	39794.4	501	501	1	1	2	2	8	8	2	8	1	8	2	8	2	8	8	8
A986915701	A9869157	2011	1	1	2	A986	1	37	#NULL!	2	3	4	1	2340.87	4071.02	#NULL!	#NULL!	10236.2	4082.01	5969.62	#NULL!	#NULL!	#NULL!	#NULL!	12179.3	#NULL!	#NULL!	#NULL!	#NULL!	#NULL!	#NULL!	501	501	1	2	8	8	8	8	2	8	1	8	2	8	2	8	8	8
A986915702	A9869157	2011	1	1	2	A986	2	35	#NULL!	2	3	4	1	2340.87	2341.64	11286.3	#NULL!	6498.56	2457.21	2876.13	#NULL!	#NULL!	11144.6	#NULL!	6254.65	#NULL!	25148.2	#NULL!	26628.9	#NULL!	#NULL!	501	501	1	2	8	8	8	8	2	8	1	8	2	8	2	8	8	8
A986915703	A9869157	2011	1	1	2	A986	1	7	#NULL!	3	3	1	#NULL!	2340.87	1924.55	#NULL!	#NULL!	#NULL!	1760.48	2577.44	#NULL!	#NULL!	#NULL!	#NULL!	#NULL!	#NULL!	#NULL!	#NULL!	#NULL!	#NULL!	#NULL!	501	501	1	2	8	8	8	8	8	8	8	8	8	8	2	8	8	8
A986915704	A9869157	2011	1	1	2	A986	2	5	71	3	3	1	#NULL!	2340.87	1826.44	#NULL!	#NULL!	#NULL!	1987.71	2501.6	#NULL!	#NULL!	#NULL!	#NULL!	#NULL!	#NULL!	#NULL!	#NULL!	#NULL!	#NULL!	#NULL!	501	501	1	2	8	8	8	8	8	8	8	8	8	8	8	8	8	8
A986916001	A9869160	2011	1	1	2	A986	1	69	#NULL!	4	3	3	5	2340.87	1772.21	#NULL!	#NULL!	3501.73	3222.3	3432.66	#NULL!	#NULL!	#NULL!	#NULL!	7350.81	#NULL!	#NULL!	#NULL!	#NULL!	#NULL!	#NULL!	501	501	1	2	8	2	8	8	2	8	1	8	2	8	2	8	8	8
A986916002	A9869160	2011	1	1	2	A986	2	44	#NULL!	3	3	4	1	2340.87	3871.94	#NULL!	6074.44	9392.39	#NULL!	#NULL!	#NULL!	#NULL!	#NULL!	#NULL!	#NULL!	17968.7	#NULL!	#NULL!	#NULL!	#NULL!	#NULL!	501	501	1	2	8	2	8	8	2	8	1	8	2	8	2	8	8	8
A986916004	A9869160	2011	1	1	2	A986	2	69	#NULL!	4	3	1	7	2340.87	2151.95	#NULL!	2752.94	4147.61	4675.9	3042.43	#NULL!	6234.64	#NULL!	#NULL!	7905.76	7020.3	#NULL!	15873.8	#NULL!	#NULL!	#NULL!	501	501	1	2	8	2	8	8	2	8	1	8	2	8	2	8	8	8
A986916301	A9869163	2011	1	1	2	A986	1	56	#NULL!	4	4	4	1	2340.87	3766.84	#NULL!	#NULL!	7087.98	4432.13	4394.96	#NULL!	#NULL!	#NULL!	#NULL!	10165.8	#NULL!	#NULL!	#NULL!	#NULL!	#NULL!	#NULL!	501	501	1	2	8	2	8	8	2	8	1	8	2	8	2	8	8	8
A986916302	A9869163	2011	1	1	2	A986	2	56	#NULL!	4	4	3	7	2340.87	2464.78	11444.6	4397.53	5208.68	2322.29	2903.8	10800.9	4428.03	11310.9	10816.8	7024.62	11255.4	30785.7	11144.1	31088.3	30409.5	30224	501	501	1	2	8	2	8	8	2	8	1	8	1	1	1	1	1	1
A986917301	A9869173	2011	1	1	2	A986	1	52	#NULL!	3	4	2	5	2340.87	3466.82	#NULL!	4173.65	11028.3	4021.54	4431.51	#NULL!	5051.15	#NULL!	#NULL!	10491.2	12042.3	#NULL!	12986.4	#NULL!	#NULL!	#NULL!	501	501	1	2	8	2	8	8	2	8	1	8	2	8	2	8	8	8
A986917302	A9869173	2011	1	1	2	A986	2	50	#NULL!	3	4	1	1	2340.87	2142.89	#NULL!	2714.1	6495.19	2071.19	2274.89	#NULL!	2820.03	#NULL!	#NULL!	5461.65	6563.94	#NULL!	6670.94	#NULL!	#NULL!	#NULL!	501	501	1	2	8	2	8	8	2	8	1	8	2	8	2	8	8	8
A986917401	A9869174	2011	1	1	2	A986	1	34	#NULL!	3	3	4	1	2340.87	3534.8	13216.1	#NULL!	15711.4	3712.57	7161.51	#NULL!	#NULL!	17117.9	#NULL!	20748.2	#NULL!	40173.4	#NULL!	57298.9	#NULL!	#NULL!	501	501	1	2	8	8	8	8	2	8	1	8	2	8	1	2	1	1
A986917402	A9869174	2011	1	1	2	A986	2	34	#NULL!	3	3	4	7	2340.87	2783.89	#NULL!	#NULL!	7509.5	2960.86	3787.9	#NULL!	#NULL!	#NULL!	#NULL!	7501.12	#NULL!	#NULL!	#NULL!	#NULL!	#NULL!	#NULL!	501	501	1	2	8	8	8	8	2	8	1	8	2	8	2	8	8	8
A986918101	A9869181	2011	1	1	2	A986	1	70	#NULL!	1	1	4	7	2340.87	2147.03	#NULL!	#NULL!	3949.77	#NULL!	#NULL!	#NULL!	#NULL!	#NULL!	#NULL!	#NULL!	#NULL!	#NULL!	#NULL!	#NULL!	#NULL!	#NULL!	501	501	1	2	8	2	8	8	2	8	1	8	1	2	2	8	8	8
A986918102	A9869181	2011	1	1	2	A986	2	60	#NULL!	1	1	3	7	2340.87	1708.86	#NULL!	3688.65	4506.59	#NULL!	#NULL!	#NULL!	#NULL!	#NULL!	#NULL!	#NULL!	8610.35	#NULL!	#NULL!	#NULL!	#NULL!	#NULL!	501	501	1	2	8	2	8	8	2	8	1	8	2	8	2	8	8	8
A986918601	A9869186	2011	1	1	2	A986	1	70	#NULL!	3	2	4	7	2340.87	2147.03	#NULL!	8270.9	5924.65	4809.45	2348.22	#NULL!	8630.24	#NULL!	#NULL!	5996.28	22213.3	#NULL!	23737.2	#NULL!	#NULL!	#NULL!	501	501	1	2	8	2	8	8	2	8	1	8	2	8	2	8	8	8
A986918602	A9869186	2011	1	1	2	A986	2	62	#NULL!	3	2	1	7	2340.87	1708.86	#NULL!	#NULL!	6759.88	2708.17	2480.58	#NULL!	#NULL!	#NULL!	#NULL!	5966.08	#NULL!	#NULL!	#NULL!	#NULL!	#NULL!	#NULL!	501	501	1	2	8	2	8	8	2	8	1	8	2	8	2	8	8	8
A986918603	A9869186	2011	1	1	2	A986	2	90	#NULL!	3	2	1	7	2340.87	1523.96	#NULL!	#NULL!	#NULL!	#NULL!	#NULL!	#NULL!	#NULL!	#NULL!	#NULL!	#NULL!	#NULL!	#NULL!	#NULL!	#NULL!	#NULL!	#NULL!	501	501	1	2	8	2	8	8	2	8	3	3	2	8	2	8	8	8
A986919201	A9869192	2011	1	1	2	A986	1	53	#NULL!	1	1	1	5	2340.87	10400.5	#NULL!	4173.65	11028.3	12064.6	13294.5	#NULL!	5051.15	#NULL!	#NULL!	31473.6	12042.3	#NULL!	12986.4	#NULL!	#NULL!	#NULL!	501	501	1	2	8	2	8	8	2	8	2	3	2	8	2	8	8	8
A986919702	A9869197	2011	1	1	2	A986	2	40	#NULL!	3	3	3	7	2340.87	5807.91	#NULL!	#NULL!	14088.6	4596.72	4249.19	#NULL!	#NULL!	#NULL!	#NULL!	13295.3	#NULL!	#NULL!	#NULL!	#NULL!	#NULL!	#NULL!	501	501	1	2	8	2	8	8	2	8	1	8	2	8	2	8	8	8
A986919703	A9869197	2011	1	1	2	A986	2	13	#NULL!	3	3	1	#NULL!	2340.87	5444.15	#NULL!	#NULL!	11091.1	4338.12	4338.81	#NULL!	#NULL!	#NULL!	#NULL!	10599.3	#NULL!	#NULL!	#NULL!	#NULL!	#NULL!	#NULL!	501	501	1	2	8	8	8	8	8	8	1	8	2	8	2	8	8	8
A986919704	A9869197	2011	1	1	2	A986	1	7	#NULL!	3	3	1	#NULL!	2340.87	3849.11	#NULL!	#NULL!	#NULL!	2640.72	3436.59	#NULL!	#NULL!	#NULL!	#NULL!	#NULL!	#NULL!	#NULL!	#NULL!	#NULL!	#NULL!	#NULL!	501	501	1	2	8	8	8	8	8	8	8	8	8	8	2	8	8	8
A986920201	A9869202	2011	1	1	2	A986	1	39	#NULL!	4	4	4	2	2340.87	4071.02	#NULL!	#NULL!	10236.2	6123.01	7959.5	#NULL!	#NULL!	#NULL!	#NULL!	18268.9	#NULL!	#NULL!	#NULL!	#NULL!	#NULL!	#NULL!	501	501	1	2	8	8	8	8	2	8	1	8	1	2	2	8	8	8
A986920202	A9869202	2011	1	1	2	A986	2	38	#NULL!	3	4	4	1	2340.87	2341.64	#NULL!	#NULL!	6498.56	3685.81	3834.84	#NULL!	#NULL!	#NULL!	#NULL!	9381.98	#NULL!	#NULL!	#NULL!	#NULL!	#NULL!	#NULL!	501	501	1	2	8	8	8	8	2	8	1	8	2	8	2	8	8	8
A986920203	A9869202	2011	1	1	2	A986	2	4	50	4	4	1	#NULL!	2340.87	1468.8	#NULL!	#NULL!	#NULL!	2115.4	3000.55	#NULL!	#NULL!	#NULL!	#NULL!	#NULL!	#NULL!	#NULL!	#NULL!	#NULL!	#NULL!	#NULL!	501	501	1	2	8	8	8	8	8	8	8	8	8	8	8	8	8	8
A986920204	A9869202	2011	1	1	2	A986	2	66	#NULL!	4	4	3	7	2340.87	1613.96	#NULL!	#NULL!	4147.61	#NULL!	#NULL!	#NULL!	#NULL!	#NULL!	#NULL!	#NULL!	#NULL!	#NULL!	#NULL!	#NULL!	#NULL!	#NULL!	501	501	1	2	8	2	8	8	2	8	2	3	2	8	2	8	8	8
A986920601	A9869206	2011	1	1	2	A986	1	51	#NULL!	4	4	2	5	2340.87	3466.82	#NULL!	4173.65	11028.3	4021.54	4431.51	#NULL!	5051.15	#NULL!	#NULL!	10491.2	12042.3	#NULL!	12986.4	#NULL!	#NULL!	#NULL!	501	501	1	2	8	2	8	8	2	8	1	8	2	8	2	8	8	8
A986920602	A9869206	2011	1	1	2	A986	2	48	#NULL!	4	4	3	3	2340.87	2679.2	10046.5	3627.1	7488.21	2517.47	3101.69	13975.1	3816.64	9788.2	14633.8	6999.69	8428.56	21651	8599.99	23262.3	33495.4	35710.9	501	501	1	2	8	2	8	8	2	8	1	8	2	8	2	8	8	8
A986921102	A9869211	2011	1	1	2	A986	2	43	#NULL!	4	4	3	2	2340.87	2903.96	#NULL!	4049.63	9392.39	3064.48	3186.89	#NULL!	3897.69	#NULL!	#NULL!	13295.3	23958.3	#NULL!	22894.1	#NULL!	#NULL!	#NULL!	501	501	1	2	8	2	8	8	2	8	1	8	2	8	2	8	8	8
A986921103	A9869211	2011	1	1	2	A986	2	14	#NULL!	4	4	1	#NULL!	2340.87	2722.07	#NULL!	#NULL!	7394.07	2892.08	3254.1	#NULL!	#NULL!	#NULL!	#NULL!	10599.3	#NULL!	#NULL!	#NULL!	#NULL!	#NULL!	#NULL!	501	501	1	2	8	8	8	8	8	8	1	8	2	8	2	8	8	8
A986922101	A9869221	2011	1	1	2	A986	1	46	#NULL!	2	3	3	2	2340.87	3971.14	13039.3	5959.42	15987	4439.16	6557.07	16145.3	7220.31	15730.7	20449.6	18991.2	18151	31278.5	22485.7	40149.2	42499.3	53201.9	501	501	1	2	8	2	8	8	2	8	1	8	2	8	2	8	8	8
A986922102	A9869221	2011	1	1	2	A986	2	44	#NULL!	2	3	3	3	2340.87	2903.96	#NULL!	4049.63	9392.39	3064.48	3186.89	#NULL!	3897.69	#NULL!	#NULL!	8863.53	11979.1	#NULL!	11447.1	#NULL!	#NULL!	#NULL!	501	501	1	2	8	2	8	8	2	8	1	8	2	8	2	8	8	8
A986922103	A9869221	2011	1	1	2	A986	2	16	#NULL!	2	3	2	7	2340.87	3620.7	#NULL!	#NULL!	11615.9	3893.62	4840.15	#NULL!	#NULL!	#NULL!	#NULL!	12929	#NULL!	#NULL!	#NULL!	#NULL!	#NULL!	#NULL!	501	501	1	2	8	8	8	8	8	8	1	8	2	8	2	8	8	8
A986922104	A9869221	2011	1	1	2	A986	2	12	#NULL!	2	3	1	#NULL!	2340.87	2722.07	9104.59	#NULL!	7394.07	2892.08	3254.1	#NULL!	#NULL!	7105.93	#NULL!	7066.19	#NULL!	22956.9	#NULL!	24371.1	#NULL!	#NULL!	501	501	1	2	8	8	8	8	8	8	1	8	2	8	1	1	1	1
A986922401	A9869224	2011	1	1	2	A986	1	69	#NULL!	1	1	1	7	2340.87	1993.74	#NULL!	#NULL!	3501.73	2416.73	2574.49	#NULL!	#NULL!	#NULL!	#NULL!	5513.11	#NULL!	#NULL!	#NULL!	#NULL!	#NULL!	#NULL!	501	501	1	2	8	2	8	8	2	8	1	8	2	8	2	8	8	8
A986922402	A9869224	2011	1	1	2	A986	2	68	#NULL!	1	1	3	7	2340.87	2420.94	#NULL!	#NULL!	4147.61	3506.92	2281.82	#NULL!	#NULL!	#NULL!	#NULL!	5929.32	#NULL!	#NULL!	#NULL!	#NULL!	#NULL!	#NULL!	501	501	1	2	8	1	2	2	2	8	1	8	1	1	2	8	8	8
A986923201	A9869232	2011	1	1	2	A986	1	66	#NULL!	4	3	3	5	2340.87	1993.74	#NULL!	2557.11	3501.73	2416.73	2574.49	#NULL!	2787.11	#NULL!	#NULL!	5513.11	5603.04	#NULL!	6080	#NULL!	#NULL!	#NULL!	501	501	1	2	8	2	8	8	2	8	1	8	2	8	2	8	8	8
A986923202	A9869232	2011	1	1	2	A986	2	64	#NULL!	4	3	1	7	2340.87	2563.29	#NULL!	1844.33	4506.59	2708.17	2480.58	#NULL!	1927.63	#NULL!	#NULL!	5966.08	4305.18	#NULL!	4551.28	#NULL!	#NULL!	#NULL!	501	501	1	2	8	1	3	2	2	8	1	8	2	8	2	8	8	8
A986923301	A9869233	2011	1	1	2	A986	1	65	#NULL!	2	1	2	6	2340.87	1329.16	#NULL!	2557.11	3501.73	1611.15	1716.33	#NULL!	2787.11	#NULL!	#NULL!	3675.4	5603.04	#NULL!	6080	#NULL!	#NULL!	#NULL!	501	501	1	2	8	2	8	8	2	8	1	8	2	8	2	8	8	8
A986923302	A9869233	2011	1	1	2	A986	2	56	#NULL!	1	1	2	3	2340.87	1643.19	#NULL!	2198.77	5208.68	1548.19	1935.86	#NULL!	2214.01	#NULL!	#NULL!	4683.08	5627.72	#NULL!	5572.07	#NULL!	#NULL!	#NULL!	501	501	1	2	8	2	8	8	2	8	1	8	2	8	2	8	8	8
A986923901	A9869239	2011	1	1	2	A986	1	54	#NULL!	4	4	2	3	2340.87	4622.42	#NULL!	4173.65	11028.3	5362.06	5908.68	#NULL!	5051.15	#NULL!	#NULL!	13988.3	12042.3	#NULL!	12986.4	#NULL!	#NULL!	#NULL!	501	501	1	2	8	2	8	8	2	8	1	8	2	8	2	8	8	8
A986923902	A9869239	2011	1	1	2	A986	2	50	#NULL!	4	4	1	3	2340.87	2857.18	#NULL!	2714.1	6495.19	2761.58	3033.19	#NULL!	2820.03	#NULL!	#NULL!	7282.2	6563.94	#NULL!	6670.94	#NULL!	#NULL!	#NULL!	501	501	1	2	8	2	8	8	2	8	1	8	2	8	2	8	8	8
A986923903	A9869239	2011	1	1	2	A986	1	27	#NULL!	4	4	4	1	2340.87	6866.15	19065	#NULL!	15883	9220.82	11909.2	#NULL!	#NULL!	22321.8	#NULL!	24159.6	#NULL!	58874.9	#NULL!	61766.5	#NULL!	#NULL!	501	501	1	2	8	8	8	8	2	8	1	8	2	8	2	8	8	8
A986925001	A9869250	2011	1	1	2	A986	1	38	#NULL!	4	4	4	5	2340.87	4071.02	10692.9	#NULL!	10236.2	#NULL!	#NULL!	#NULL!	#NULL!	#NULL!	#NULL!	#NULL!	#NULL!	25861.7	#NULL!	#NULL!	#NULL!	#NULL!	501	501	1	2	8	8	8	8	2	8	1	8	2	8	2	8	8	8
A986925003	A9869250	2011	1	1	2	A986	2	8	#NULL!	4	4	1	#NULL!	2340.87	1826.44	#NULL!	#NULL!	#NULL!	#NULL!	#NULL!	#NULL!	#NULL!	#NULL!	#NULL!	#NULL!	#NULL!	#NULL!	#NULL!	#NULL!	#NULL!	#NULL!	501	501	1	2	8	8	8	8	8	8	8	8	8	8	2	8	8	8
A986925004	A9869250	2011	1	1	2	A986	1	6	78	4	4	1	#NULL!	2340.87	1924.55	#NULL!	#NULL!	#NULL!	2347.3	3866.16	#NULL!	#NULL!	#NULL!	#NULL!	#NULL!	#NULL!	#NULL!	#NULL!	#NULL!	#NULL!	#NULL!	501	501	1	2	8	8	8	8	8	8	8	8	8	8	2	8	8	8
A986925005	A9869250	2011	1	1	2	A986	1	66	#NULL!	4	4	1	7	2340.87	1329.16	5176.42	5114.21	3501.73	2148.2	2574.49	8176.09	5574.23	10868.2	8529.24	4900.54	11206.1	11349	12160	25604.5	18748.4	19659.7	501	501	1	2	8	2	8	8	2	8	3	3	2	8	2	8	8	8
A986925006	A9869250	2011	1	1	2	A986	2	65	#NULL!	4	4	1	7	2340.87	1613.96	#NULL!	#NULL!	4147.61	3117.27	2281.82	#NULL!	#NULL!	#NULL!	#NULL!	5270.51	#NULL!	#NULL!	#NULL!	#NULL!	#NULL!	#NULL!	501	501	1	1	2	2	8	8	2	8	1	8	2	8	2	8	8	8
A986925501	A9869255	2011	1	1	2	A986	1	56	#NULL!	4	4	3	2	2340.87	3348.3	14495.1	3182.19	7087.98	3939.67	3906.63	9706.9	3679	16008.6	10720.7	9036.27	7665.03	32939.5	9024.46	35397.4	22508.1	24081.6	501	501	1	2	8	2	8	8	2	8	1	8	2	8	1	2	2	2
A986925502	A9869255	2011	1	1	2	A986	2	52	#NULL!	4	4	2	3	2340.87	2857.18	#NULL!	2714.1	6495.19	2761.58	3033.19	#NULL!	2820.03	#NULL!	#NULL!	7282.2	6563.94	#NULL!	6670.94	#NULL!	#NULL!	#NULL!	501	501	1	2	8	2	8	8	2	8	1	8	2	8	2	8	8	8
A986925503	A9869255	2011	1	1	2	A986	1	29	#NULL!	4	4	4	1	2340.87	6866.15	#NULL!	#NULL!	15883	9220.82	11909.2	#NULL!	#NULL!	#NULL!	#NULL!	24159.6	#NULL!	#NULL!	#NULL!	#NULL!	#NULL!	#NULL!	501	501	1	2	8	8	8	8	2	8	1	8	2	8	2	8	8	8
A987918801	A9879188	2011	1	1	1	A987	1	62	#NULL!	4	4	3	5	17058.1	7496.75	#NULL!	11681.8	17245.8	6858.02	7979.48	#NULL!	13093.1	#NULL!	#NULL!	20886	30117	#NULL!	33025.4	#NULL!	#NULL!	#NULL!	512	517	1	2	8	2	8	8	2	8	2	3	1	1	2	8	8	8
A987918802	A9879188	2011	1	1	1	A987	2	57	#NULL!	4	4	2	3	17058.1	7089.87	#NULL!	11384.4	17979.1	5343.99	8352.68	#NULL!	11463.4	#NULL!	#NULL!	20206.1	29138.3	#NULL!	28850.2	#NULL!	#NULL!	#NULL!	512	517	1	2	8	2	8	8	2	8	1	8	2	8	2	8	8	8
A987918803	A9879188	2011	1	1	1	A987	1	29	#NULL!	4	4	4	1	17058.1	18436.3	#NULL!	#NULL!	51942	19549.1	22424	#NULL!	#NULL!	#NULL!	#NULL!	58835.1	#NULL!	#NULL!	#NULL!	#NULL!	#NULL!	#NULL!	512	517	1	2	8	8	8	8	2	8	1	8	1	2	2	8	8	8
A987918804	A9879188	2011	1	1	1	A987	2	84	#NULL!	4	4	1	7	17058.1	6575.44	#NULL!	#NULL!	14610.1	5227.5	6543.32	#NULL!	#NULL!	#NULL!	#NULL!	16578.3	#NULL!	#NULL!	#NULL!	#NULL!	#NULL!	#NULL!	512	517	1	2	8	2	8	8	1	1	2	3	2	8	2	8	8	8
A987919101	A9879191	2011	1	1	1	A987	1	55	#NULL!	1	2	4	1	17058.1	8668.15	#NULL!	10984.2	24466	10199.1	10113.6	#NULL!	12699	#NULL!	#NULL!	23393.3	26457.8	#NULL!	31150.3	#NULL!	#NULL!	#NULL!	512	517	1	2	8	2	8	8	2	8	1	8	2	8	2	8	8	8
A987919102	A9879191	2011	1	1	1	A987	2	49	#NULL!	1	2	3	1	17058.1	9247.97	52017	12519.9	25847.5	8689.72	10706.3	48238.6	13174.1	64561.8	50512.3	24161.3	29093.4	148835	29685.1	160592	115618	123265	512	517	1	2	8	2	8	8	2	8	1	8	2	8	2	8	8	8
A987919103	A9879191	2011	1	1	1	A987	1	21	#NULL!	1	2	3	7	17058.1	14949.8	#NULL!	#NULL!	54690.5	19024.9	23766.3	#NULL!	#NULL!	#NULL!	#NULL!	63508	#NULL!	#NULL!	#NULL!	#NULL!	#NULL!	#NULL!	512	517	1	2	8	8	8	8	2	8	1	8	2	8	2	8	8	8
A987919104	A9879191	2011	1	1	1	A987	2	13	#NULL!	1	2	1	#NULL!	17058.1	9395.95	#NULL!	#NULL!	25522.6	9982.77	11232.4	#NULL!	#NULL!	#NULL!	#NULL!	24390.8	#NULL!	#NULL!	#NULL!	#NULL!	#NULL!	#NULL!	512	517	1	2	8	8	8	8	8	8	1	8	2	8	1	1	1	1
A987919201	A9879192	2011	1	1	1	A987	1	35	#NULL!	2	2	3	3	17058.1	14052.2	#NULL!	#NULL!	35332.8	14090.1	20545.4	#NULL!	#NULL!	#NULL!	#NULL!	42040	#NULL!	#NULL!	#NULL!	#NULL!	#NULL!	#NULL!	512	517	1	2	8	8	8	8	2	8	1	8	2	8	2	8	8	8
A987919202	A9879192	2011	1	1	1	A987	2	34	#NULL!	2	2	4	7	17058.1	9609.33	36717.4	#NULL!	25921	10220.2	13074.9	#NULL!	#NULL!	38483.3	#NULL!	25892.1	#NULL!	98091.1	#NULL!	97051.1	#NULL!	#NULL!	512	517	1	2	8	8	8	8	1	1	1	8	2	8	2	8	8	8
A987919203	A9879192	2011	1	1	1	A987	1	6	80	2	2	1	#NULL!	17058.1	6643.1	#NULL!	#NULL!	#NULL!	6076.75	8896.71	#NULL!	#NULL!	#NULL!	#NULL!	#NULL!	#NULL!	#NULL!	#NULL!	#NULL!	#NULL!	#NULL!	512	517	1	1	2	8	8	8	8	8	8	8	8	8	1	1	1	1
A987919204	A9879192	2011	1	1	1	A987	1	4	57	2	2	1	#NULL!	17058.1	5454.17	#NULL!	#NULL!	#NULL!	5391.73	7659.78	#NULL!	#NULL!	#NULL!	#NULL!	#NULL!	#NULL!	#NULL!	#NULL!	#NULL!	#NULL!	#NULL!	512	517	1	2	8	8	8	8	8	8	8	8	8	8	8	8	8	8
A987919501	A9879195	2011	1	1	1	A987	1	68	#NULL!	4	3	3	7	17058.1	4587.95	26801.7	8826.52	12087.1	8341.96	8886.53	28221.9	9620.45	28135.9	29440.9	19029.9	19340.3	58761.2	20986.7	66285.4	64715.1	67860.7	512	517	1	2	8	2	8	8	2	8	1	8	2	8	2	8	8	8
A987919502	A9879195	2011	1	1	1	A987	2	63	#NULL!	4	3	2	7	17058.1	5898.58	#NULL!	6366.18	15555.7	9347.94	8562.37	#NULL!	6653.72	#NULL!	#NULL!	20593.5	14860.4	#NULL!	15709.9	#NULL!	#NULL!	#NULL!	512	517	1	1	2	1	2	1	2	8	1	8	2	8	1	1	1	1
A987919503	A9879195	2011	1	1	1	A987	1	29	#NULL!	3	3	4	7	17058.1	17775.2	#NULL!	#NULL!	51942	#NULL!	#NULL!	#NULL!	#NULL!	#NULL!	#NULL!	#NULL!	#NULL!	#NULL!	#NULL!	#NULL!	#NULL!	#NULL!	512	517	1	2	8	8	8	8	2	8	1	8	2	8	2	8	8	8
A987919901	A9879199	2011	1	1	1	A987	2	54	#NULL!	1	2	3	1	17058.1	7396.73	17137.3	9368.43	22419.8	7149.24	7852.39	23627.8	9734.06	16965.5	24759	18852.3	22657.2	37837.2	23026.5	38554.5	59410.2	59848.5	512	517	1	2	8	2	8	8	2	8	1	8	2	8	1	2	1	1
A987919902	A9879199	2011	1	1	1	A987	1	26	#NULL!	1	2	2	7	17058.1	17775.2	16451.9	#NULL!	51942	19549.1	22424	#NULL!	#NULL!	19262.4	#NULL!	58835.1	#NULL!	50805.6	#NULL!	53300.8	#NULL!	#NULL!	512	517	1	2	8	8	8	8	2	8	1	8	2	8	2	8	8	8
A987922001	A9879220	2011	1	1	1	A987	1	50	#NULL!	1	2	4	1	17058.1	11966.6	26912.5	14406.5	38067.1	18508.5	19876.7	48044	17435.4	63411	55693.9	48284.2	41567.2	85636.3	44826.1	167571	121457	125914	512	517	1	2	8	2	8	8	2	8	1	8	2	8	2	8	8	8
A987922002	A9879220	2011	1	1	1	A987	2	48	#NULL!	1	2	4	1	17058.1	9247.97	#NULL!	12519.9	25847.5	11586.3	14275.1	#NULL!	13174.1	#NULL!	#NULL!	32215	29093.4	#NULL!	29685.1	#NULL!	#NULL!	#NULL!	512	517	1	2	8	2	8	8	2	8	1	8	2	8	2	8	8	8
A987922003	A9879220	2011	1	1	1	A987	1	23	#NULL!	1	2	3	7	17058.1	14949.8	25355.7	#NULL!	54690.5	#NULL!	#NULL!	#NULL!	#NULL!	#NULL!	#NULL!	#NULL!	#NULL!	72620.4	#NULL!	#NULL!	#NULL!	#NULL!	512	517	1	2	8	8	8	8	2	8	1	8	2	8	2	8	8	8
A987922004	A9879220	2011	1	1	1	A987	1	16	#NULL!	1	2	2	7	17058.1	11725.6	#NULL!	#NULL!	35776.8	17482.3	19798.1	#NULL!	#NULL!	#NULL!	#NULL!	52504.1	#NULL!	#NULL!	#NULL!	#NULL!	#NULL!	#NULL!	512	517	1	1	1	8	8	8	8	8	1	8	2	8	1	2	2	2
A987922101	A9879221	2011	1	1	1	A987	1	49	#NULL!	3	4	4	1	17058.1	13707.4	45008.6	20570.5	51721	15322.9	20673.6	55729.7	24922.8	64262.2	70587.1	58368.1	62652.9	134958	73762	173232	146697	183640	512	517	1	1	2	2	8	8	2	8	1	8	2	8	1	2	2	2
A987922102	A9879221	2011	1	1	1	A987	2	45	#NULL!	3	4	3	7	17058.1	9247.97	#NULL!	12519.9	25847.5	8689.72	10706.3	#NULL!	13174.1	#NULL!	#NULL!	24161.3	29093.4	#NULL!	29685.1	#NULL!	#NULL!	#NULL!	512	517	1	2	8	2	8	8	2	8	1	8	2	8	1	1	1	1
A987922103	A9879221	2011	1	1	1	A987	1	18	#NULL!	3	4	2	7	17058.1	11725.6	#NULL!	#NULL!	35776.8	13111.7	18910.1	#NULL!	#NULL!	#NULL!	#NULL!	39740.4	#NULL!	#NULL!	#NULL!	#NULL!	#NULL!	#NULL!	512	517	1	2	8	8	8	8	8	8	1	8	2	8	1	1	1	1
A987922104	A9879221	2011	1	1	1	A987	1	16	#NULL!	3	4	2	7	17058.1	11725.6	#NULL!	#NULL!	35776.8	13111.7	18910.1	#NULL!	#NULL!	#NULL!	#NULL!	39740.4	#NULL!	#NULL!	#NULL!	#NULL!	#NULL!	#NULL!	512	517	1	2	8	8	8	8	8	8	1	8	2	8	1	2	2	1
A987922105	A9879221	2011	1	1	1	A987	1	14	#NULL!	3	4	1	#NULL!	17058.1	6616.58	27637.1	#NULL!	24774.3	6790.65	10435.1	#NULL!	#NULL!	29197.8	#NULL!	23270.3	#NULL!	57928	#NULL!	61341.9	#NULL!	#NULL!	512	517	1	1	2	8	8	8	8	8	1	8	2	8	1	1	2	1
A987923101	A9879231	2011	1	1	1	A987	1	31	#NULL!	1	2	4	1	17058.1	12201.3	22809.4	#NULL!	52707.3	12814.9	20572.1	#NULL!	#NULL!	29543.4	#NULL!	59786.6	#NULL!	69334.6	#NULL!	98891	#NULL!	#NULL!	512	517	1	2	8	8	8	8	2	8	1	8	2	8	2	8	8	8
A987923601	A9879236	2011	1	1	1	A987	2	28	#NULL!	1	2	3	7	17058.1	15741.5	12791.7	#NULL!	38489.3	#NULL!	#NULL!	#NULL!	#NULL!	#NULL!	#NULL!	#NULL!	#NULL!	35319.8	#NULL!	#NULL!	#NULL!	#NULL!	512	517	1	2	8	8	8	8	1	1	1	8	2	8	2	8	8	8
A988917101	A9889171	2011	1	1	2	A988	1	38	#NULL!	3	3	4	2	2340.87	4071.02	#NULL!	#NULL!	10236.2	#NULL!	#NULL!	#NULL!	#NULL!	#NULL!	#NULL!	#NULL!	#NULL!	#NULL!	#NULL!	#NULL!	#NULL!	#NULL!	501	501	1	2	8	8	8	8	2	8	1	8	2	8	2	8	8	8
A988917102	A9889171	2011	1	1	2	A988	2	39	#NULL!	2	3	4	7	2340.87	2341.64	#NULL!	#NULL!	6498.56	4914.41	3834.84	#NULL!	#NULL!	#NULL!	#NULL!	9381.98	#NULL!	#NULL!	#NULL!	#NULL!	#NULL!	#NULL!	501	501	1	2	8	8	8	8	2	8	1	8	2	8	2	8	8	8
A988917103	A9889171	2011	1	1	2	A988	1	10	#NULL!	3	3	1	#NULL!	2340.87	1916.87	#NULL!	#NULL!	7177.3	3934.6	4030.82	#NULL!	#NULL!	#NULL!	#NULL!	10112.4	#NULL!	#NULL!	#NULL!	#NULL!	#NULL!	#NULL!	501	501	1	2	8	8	8	8	8	8	8	8	8	8	2	8	8	8
A988917104	A9889171	2011	1	1	2	A988	1	6	80	3	3	1	#NULL!	2340.87	1924.55	#NULL!	#NULL!	#NULL!	3520.96	3436.59	#NULL!	#NULL!	#NULL!	#NULL!	#NULL!	#NULL!	#NULL!	#NULL!	#NULL!	#NULL!	#NULL!	501	501	1	2	8	8	8	8	8	8	8	8	8	8	2	8	8	8
A988917302	A9889173	2011	1	1	2	A988	2	46	#NULL!	2	3	1	7	2340.87	2679.2	5023.23	#NULL!	7488.21	2517.47	3101.69	#NULL!	#NULL!	7341.15	#NULL!	6999.69	#NULL!	16238.3	#NULL!	17446.7	#NULL!	#NULL!	501	501	1	2	8	1	2	2	2	8	1	8	1	1	2	8	8	8
A988917303	A9889173	2011	1	1	2	A988	2	17	#NULL!	2	3	2	7	2340.87	3620.7	4791.53	#NULL!	11615.9	3893.62	4840.15	#NULL!	#NULL!	6770.05	#NULL!	12929	#NULL!	12325.1	#NULL!	14178.8	#NULL!	#NULL!	501	501	1	2	8	8	8	8	8	8	1	8	1	1	2	8	8	8
A988917304	A9889173	2011	1	1	2	A988	2	15	#NULL!	2	3	1	7	2340.87	3620.7	#NULL!	#NULL!	11615.9	3893.62	4840.15	#NULL!	#NULL!	#NULL!	#NULL!	12929	#NULL!	#NULL!	#NULL!	#NULL!	#NULL!	#NULL!	501	501	1	2	8	8	8	8	8	8	1	8	3	8	2	8	8	8
A988918001	A9889180	2011	1	1	2	A988	2	55	#NULL!	2	2	1	5	2340.87	1643.19	11444.6	2198.77	5208.68	1548.19	1935.86	5400.46	2214.01	11310.9	5408.42	7024.62	5627.72	30785.7	5572.07	31088.3	15204.7	15112	501	501	1	2	8	2	8	8	2	8	1	8	2	8	2	8	8	8
A988918002	A9889180	2011	1	1	2	A988	1	32	#NULL!	1	2	4	5	2340.87	3534.8	#NULL!	#NULL!	15711.4	3712.57	7161.51	#NULL!	#NULL!	#NULL!	#NULL!	31122.3	#NULL!	#NULL!	#NULL!	#NULL!	#NULL!	#NULL!	501	501	1	2	8	8	8	8	2	8	1	8	2	8	2	8	8	8
A988918003	A9889180	2011	1	1	2	A988	2	30	#NULL!	2	2	4	7	2340.87	2783.89	#NULL!	#NULL!	#NULL!	2960.86	3787.9	#NULL!	#NULL!	#NULL!	#NULL!	#NULL!	#NULL!	#NULL!	#NULL!	#NULL!	#NULL!	#NULL!	501	501	1	2	8	8	8	8	2	8	1	8	2	8	2	8	8	8
A988918004	A9889180	2011	1	1	2	A988	1	2	32	2	2	1	#NULL!	2340.87	1580.11	#NULL!	#NULL!	#NULL!	1562.02	2219.09	#NULL!	#NULL!	#NULL!	#NULL!	#NULL!	#NULL!	#NULL!	#NULL!	#NULL!	#NULL!	#NULL!	501	501	1	8	8	8	8	8	8	8	8	8	8	8	8	8	8	8
A988918501	A9889185	2011	1	1	2	A988	1	33	#NULL!	3	3	4	1	2340.87	3534.8	#NULL!	#NULL!	15711.4	3712.57	7161.51	#NULL!	#NULL!	#NULL!	#NULL!	20748.2	#NULL!	#NULL!	#NULL!	#NULL!	#NULL!	#NULL!	501	501	1	2	8	8	8	8	1	1	1	8	2	8	2	8	8	8
A988918502	A9889185	2011	1	1	2	A988	2	30	#NULL!	3	3	4	7	2340.87	2783.89	10637.3	#NULL!	7509.5	2960.86	3787.9	#NULL!	#NULL!	11148.9	#NULL!	7501.12	#NULL!	28417.7	#NULL!	28116.4	#NULL!	#NULL!	501	501	1	2	8	8	8	8	2	8	1	8	1	1	2	8	8	8
A988918503	A9889185	2011	1	1	2	A988	1	2	26	3	3	1	#NULL!	2340.87	1580.11	#NULL!	#NULL!	#NULL!	1562.02	2219.09	#NULL!	#NULL!	#NULL!	#NULL!	#NULL!	#NULL!	#NULL!	#NULL!	#NULL!	#NULL!	#NULL!	501	501	1	8	8	8	8	8	8	8	8	8	8	8	8	8	8	8
A988918701	A9889187	2011	1	1	2	A988	1	34	#NULL!	4	4	4	2	2340.87	3534.8	#NULL!	#NULL!	15711.4	3712.57	7161.51	#NULL!	#NULL!	#NULL!	#NULL!	20748.2	#NULL!	#NULL!	#NULL!	#NULL!	#NULL!	#NULL!	501	501	1	2	8	8	8	8	2	8	1	8	2	8	2	8	8	8
A988918702	A9889187	2011	1	1	2	A988	2	35	#NULL!	4	4	4	7	2340.87	2341.64	#NULL!	#NULL!	6498.56	2457.21	2876.13	#NULL!	#NULL!	#NULL!	#NULL!	6254.65	#NULL!	#NULL!	#NULL!	#NULL!	#NULL!	#NULL!	501	501	1	2	8	8	8	8	2	8	1	8	2	8	2	8	8	8
A988918703	A9889187	2011	1	1	2	A988	1	1	14	4	4	1	#NULL!	2340.87	1580.11	#NULL!	#NULL!	#NULL!	1562.02	2219.09	#NULL!	#NULL!	#NULL!	#NULL!	#NULL!	#NULL!	#NULL!	#NULL!	#NULL!	#NULL!	#NULL!	501	501	1	8	8	8	8	8	8	8	8	8	8	8	8	8	8	8
A988919101	A9889191	2011	1	1	2	A988	1	37	#NULL!	3	3	4	2	2340.87	4071.02	#NULL!	#NULL!	10236.2	4082.01	5969.62	#NULL!	#NULL!	#NULL!	#NULL!	12179.3	#NULL!	#NULL!	#NULL!	#NULL!	#NULL!	#NULL!	501	501	1	2	8	8	8	8	2	8	1	8	2	8	2	8	8	8
A988919102	A9889191	2011	1	1	2	A988	2	37	#NULL!	3	3	4	1	2340.87	2341.64	#NULL!	#NULL!	6498.56	2457.21	2876.13	#NULL!	#NULL!	#NULL!	#NULL!	6254.65	#NULL!	#NULL!	#NULL!	#NULL!	#NULL!	#NULL!	501	501	1	2	8	8	8	8	2	8	1	8	2	8	2	8	8	8
A988919103	A9889191	2011	1	1	2	A988	2	3	40	3	3	1	#NULL!	2340.87	1468.8	#NULL!	#NULL!	#NULL!	1410.27	2250.41	#NULL!	#NULL!	#NULL!	#NULL!	#NULL!	#NULL!	#NULL!	#NULL!	#NULL!	#NULL!	#NULL!	501	501	1	8	8	8	8	8	8	8	8	8	8	8	8	8	8	8
A988919701	A9889197	2011	1	1	2	A988	1	74	#NULL!	2	1	1	7	2340.87	2147.03	32785.6	2756.97	3949.77	3206.3	1565.48	86910.2	2876.75	33425.1	94230	3997.52	7404.42	55165.8	7912.38	62146.3	84188.6	99575.3	501	501	1	2	8	1	1	2	2	8	1	8	2	8	1	1	1	1
A988919702	A9889197	2011	1	1	2	A988	2	62	#NULL!	1	1	1	7	2340.87	1708.86	#NULL!	1844.33	4506.59	1805.44	1653.72	#NULL!	1927.63	#NULL!	#NULL!	3977.39	4305.18	#NULL!	4551.28	#NULL!	#NULL!	#NULL!	501	501	1	2	8	2	8	8	1	2	1	8	1	1	2	8	8	8
A988920101	A9889201	2011	1	1	2	A988	1	36	#NULL!	2	2	4	2	2340.87	4071.02	#NULL!	#NULL!	#NULL!	4082.01	5969.62	#NULL!	#NULL!	#NULL!	#NULL!	#NULL!	#NULL!	#NULL!	#NULL!	#NULL!	#NULL!	#NULL!	501	501	1	2	8	8	8	8	2	8	1	8	2	8	2	8	8	8
A988920102	A9889201	2011	1	1	2	A988	2	29	#NULL!	1	2	3	7	2340.87	4560.42	#NULL!	#NULL!	22301.2	4311.91	4511.42	#NULL!	#NULL!	#NULL!	#NULL!	22901.1	#NULL!	#NULL!	#NULL!	#NULL!	#NULL!	#NULL!	501	501	1	2	8	8	8	8	2	8	1	8	2	8	2	8	8	8
A988920103	A9889201	2011	1	1	2	A988	1	4	54	2	2	1	#NULL!	2340.87	1580.11	#NULL!	#NULL!	#NULL!	1562.02	2219.09	#NULL!	#NULL!	#NULL!	#NULL!	#NULL!	#NULL!	#NULL!	#NULL!	#NULL!	#NULL!	#NULL!	501	501	1	1	9	8	8	8	8	8	8	8	8	8	8	8	8	8
A988920104	A9889201	2011	1	1	2	A988	2	1	15	2	2	1	#NULL!	2340.87	1468.8	#NULL!	#NULL!	#NULL!	1410.27	2250.41	#NULL!	#NULL!	#NULL!	#NULL!	#NULL!	#NULL!	#NULL!	#NULL!	#NULL!	#NULL!	#NULL!	501	501	1	8	8	8	8	8	8	8	8	8	8	8	8	8	8	8
A988920105	A9889201	2011	1	1	2	A988	1	1	15	2	2	1	#NULL!	2340.87	1580.11	#NULL!	#NULL!	#NULL!	1562.02	2219.09	#NULL!	#NULL!	#NULL!	#NULL!	#NULL!	#NULL!	#NULL!	#NULL!	#NULL!	#NULL!	#NULL!	501	501	1	8	8	8	8	8	8	8	8	8	8	8	8	8	8	8
A988920601	A9889206	2011	1	1	2	A988	1	28	#NULL!	3	4	4	1	2340.87	5149.62	#NULL!	#NULL!	15883	6915.62	8931.93	#NULL!	#NULL!	#NULL!	#NULL!	18119.7	#NULL!	#NULL!	#NULL!	#NULL!	#NULL!	#NULL!	501	501	1	2	8	8	8	8	2	8	1	8	2	8	2	8	8	8
A988921101	A9889211	2011	1	1	2	A988	1	37	#NULL!	1	2	4	2	2340.87	4071.02	10692.9	#NULL!	10236.2	4082.01	5969.62	#NULL!	#NULL!	13868.7	#NULL!	12179.3	#NULL!	25861.7	#NULL!	34492.9	#NULL!	#NULL!	501	501	1	2	8	8	8	8	2	8	1	8	2	8	2	8	8	8
A988921102	A9889211	2011	1	1	2	A988	2	36	#NULL!	1	2	4	7	2340.87	2341.64	#NULL!	#NULL!	6498.56	2457.21	2876.13	#NULL!	#NULL!	#NULL!	#NULL!	6254.65	#NULL!	#NULL!	#NULL!	#NULL!	#NULL!	#NULL!	501	501	1	2	8	8	8	8	2	8	1	8	2	8	2	8	8	8
A988921103	A9889211	2011	1	1	2	A988	1	1	18	1	2	1	#NULL!	2340.87	1580.11	#NULL!	#NULL!	#NULL!	1562.02	2219.09	#NULL!	#NULL!	#NULL!	#NULL!	#NULL!	#NULL!	#NULL!	#NULL!	#NULL!	#NULL!	#NULL!	501	501	1	8	8	8	8	8	8	8	8	8	8	8	8	8	8	8
A988921901	A9889219	2011	1	1	2	A988	1	46	#NULL!	3	3	3	3	2340.87	3971.14	#NULL!	5959.42	15987	5918.88	8742.76	#NULL!	7220.31	#NULL!	#NULL!	25321.6	18151	#NULL!	22485.7	#NULL!	#NULL!	#NULL!	501	501	1	2	8	2	8	8	2	8	1	8	2	8	2	8	8	8
A988921902	A9889219	2011	1	1	2	A988	2	43	#NULL!	3	3	3	2	2340.87	2903.96	#NULL!	4049.63	9392.39	4085.97	4249.19	#NULL!	3897.69	#NULL!	#NULL!	11818	11979.1	#NULL!	11447.1	#NULL!	#NULL!	#NULL!	501	501	1	2	8	2	8	8	2	8	1	8	2	8	2	8	8	8
A988921903	A9889219	2011	1	1	2	A988	1	17	#NULL!	3	3	2	7	2340.87	3397	#NULL!	#NULL!	10364.8	#NULL!	#NULL!	#NULL!	#NULL!	#NULL!	#NULL!	#NULL!	#NULL!	#NULL!	#NULL!	#NULL!	#NULL!	#NULL!	501	501	1	2	8	8	8	8	8	8	1	8	2	8	2	8	8	8
A988921904	A9889219	2011	1	1	2	A988	2	15	#NULL!	3	3	1	7	2340.87	3620.7	9583.05	#NULL!	11615.9	5191.49	6453.54	#NULL!	#NULL!	18053.5	#NULL!	17238.6	#NULL!	32866.9	#NULL!	37810.1	#NULL!	#NULL!	501	501	1	2	8	8	8	8	8	8	1	8	2	8	2	8	8	8
A988922301	A9889223	2011	1	1	2	A988	1	29	#NULL!	1	2	4	3	2340.87	5149.62	4766.24	#NULL!	31766	#NULL!	#NULL!	#NULL!	#NULL!	#NULL!	#NULL!	#NULL!	#NULL!	29437.5	#NULL!	#NULL!	#NULL!	#NULL!	501	501	1	2	8	8	8	8	2	8	1	8	2	8	2	8	8	8
A988922302	A9889223	2011	1	1	2	A988	2	29	#NULL!	1	2	4	7	2340.87	4560.42	3705.86	#NULL!	#NULL!	8623.83	6767.13	#NULL!	#NULL!	8553.89	#NULL!	#NULL!	#NULL!	#NULL!	#NULL!	#NULL!	#NULL!	#NULL!	501	501	1	2	8	8	8	8	2	8	1	8	2	8	2	8	8	8
A988922303	A9889223	2011	1	1	2	A988	2	1	20	1	2	1	#NULL!	2340.87	1468.8	#NULL!	#NULL!	#NULL!	2820.53	3375.62	#NULL!	#NULL!	#NULL!	#NULL!	#NULL!	#NULL!	#NULL!	#NULL!	#NULL!	#NULL!	#NULL!	501	501	1	8	8	8	8	8	8	8	8	8	8	8	8	8	8	8
A988922701	A9889227	2011	1	1	2	A988	1	29	#NULL!	2	2	4	1	2340.87	5149.62	#NULL!	#NULL!	15883	6915.62	8931.93	#NULL!	#NULL!	#NULL!	#NULL!	18119.7	#NULL!	#NULL!	#NULL!	#NULL!	#NULL!	#NULL!	501	501	1	1	2	8	8	8	2	8	1	8	2	8	1	1	1	1
A988922702	A9889227	2011	1	1	2	A988	2	30	#NULL!	1	2	4	7	2340.87	2783.89	#NULL!	#NULL!	7509.5	2960.86	3787.9	#NULL!	#NULL!	#NULL!	#NULL!	7501.12	#NULL!	#NULL!	#NULL!	#NULL!	#NULL!	#NULL!	501	501	1	2	8	8	8	8	2	8	1	8	2	8	2	8	8	8
A988922703	A9889227	2011	1	1	2	A988	1	1	17	2	2	1	#NULL!	2340.87	1580.11	#NULL!	#NULL!	#NULL!	1562.02	2219.09	#NULL!	#NULL!	#NULL!	#NULL!	#NULL!	#NULL!	#NULL!	#NULL!	#NULL!	#NULL!	#NULL!	501	501	1	8	8	8	8	8	8	8	8	8	8	8	8	8	8	8
A988923501	A9889235	2011	1	1	2	A988	1	45	#NULL!	3	4	4	2	2340.87	3971.14	#NULL!	11918.8	15987	4439.16	6557.07	#NULL!	14440.6	#NULL!	#NULL!	18991.2	36302	#NULL!	44971.5	#NULL!	#NULL!	#NULL!	501	501	1	1	2	2	8	8	2	8	1	8	2	8	1	1	1	1
A988923502	A9889235	2011	1	1	2	A988	2	43	#NULL!	3	4	4	7	2340.87	2903.96	#NULL!	#NULL!	9392.39	3064.48	3186.89	#NULL!	#NULL!	#NULL!	#NULL!	8863.53	#NULL!	#NULL!	#NULL!	#NULL!	#NULL!	#NULL!	501	501	1	1	2	2	8	8	1	1	1	8	1	1	1	1	1	1
A988923503	A9889235	2011	1	1	2	A988	1	3	46	4	4	1	#NULL!	2340.87	1580.11	#NULL!	#NULL!	#NULL!	1562.02	2219.09	#NULL!	#NULL!	#NULL!	#NULL!	#NULL!	#NULL!	#NULL!	#NULL!	#NULL!	#NULL!	#NULL!	501	501	1	8	8	8	8	8	8	8	8	8	8	8	8	8	8	8
A988923802	A9889238	2011	1	1	2	A988	2	66	#NULL!	3	2	2	7	2340.87	1613.96	3280.62	#NULL!	4147.61	2337.95	1521.22	#NULL!	#NULL!	3520.48	#NULL!	3952.88	#NULL!	7860.11	#NULL!	8434.62	#NULL!	#NULL!	501	501	1	2	8	2	8	8	1	2	1	8	2	8	1	1	1	1
A988924201	A9889242	2011	1	1	2	A988	1	41	#NULL!	3	3	4	1	2340.87	4570.82	11050.6	5071.6	12654.2	5039.99	6349.65	7552.86	6633.47	12291	9302.21	16984.9	12587.5	20785.5	17848.1	24236.5	15752.8	19754.4	501	501	1	2	8	2	8	8	2	8	1	8	2	8	2	8	8	8
A988924202	A9889242	2011	1	1	2	A988	2	39	#NULL!	3	3	3	6	2340.87	2341.64	#NULL!	#NULL!	6498.56	2457.21	2876.13	#NULL!	#NULL!	#NULL!	#NULL!	6254.65	#NULL!	#NULL!	#NULL!	#NULL!	#NULL!	#NULL!	501	501	1	2	8	8	8	8	2	8	2	3	2	8	2	8	8	8
A988924203	A9889242	2011	1	1	2	A988	1	11	#NULL!	3	3	1	#NULL!	2340.87	1916.87	8006.65	#NULL!	7177.3	1967.3	3023.12	#NULL!	#NULL!	6767.05	#NULL!	6741.57	#NULL!	13425.7	#NULL!	14217	#NULL!	#NULL!	501	501	1	1	2	8	8	8	8	8	8	8	8	8	2	8	8	8
A988924204	A9889242	2011	1	1	2	A988	2	10	#NULL!	3	3	1	#NULL!	2340.87	2722.07	#NULL!	#NULL!	7394.07	2892.08	3254.1	#NULL!	#NULL!	#NULL!	#NULL!	7066.19	#NULL!	#NULL!	#NULL!	#NULL!	#NULL!	#NULL!	501	501	1	2	8	8	8	8	8	8	8	8	8	8	2	8	8	8
A988924901	A9889249	2011	1	1	2	A988	1	46	#NULL!	3	4	4	2	2340.87	3971.14	#NULL!	5959.42	15987	4439.16	6557.07	#NULL!	7220.31	#NULL!	#NULL!	18991.2	18151	#NULL!	22485.7	#NULL!	#NULL!	#NULL!	501	501	1	2	8	2	8	8	2	8	2	3	2	8	2	8	8	8
A988924902	A9889249	2011	1	1	2	A988	1	13	#NULL!	4	4	1	#NULL!	2340.87	1916.87	#NULL!	#NULL!	7177.3	1967.3	3023.12	#NULL!	#NULL!	#NULL!	#NULL!	6741.57	#NULL!	#NULL!	#NULL!	#NULL!	#NULL!	#NULL!	501	501	1	2	8	8	8	8	8	8	1	8	2	8	2	8	8	8
A988924903	A9889249	2011	1	1	2	A988	2	74	#NULL!	4	4	1	7	2340.87	1444.46	#NULL!	3336.35	4232.64	1387.86	1516.52	#NULL!	3481.39	#NULL!	#NULL!	3842.27	8913.89	#NULL!	8885.16	#NULL!	#NULL!	#NULL!	501	501	1	2	8	1	2	2	2	8	1	8	1	2	2	8	8	8
A988925001	A9889250	2011	1	1	2	A988	1	34	#NULL!	3	3	4	1	2340.87	3534.8	#NULL!	#NULL!	15711.4	#NULL!	#NULL!	#NULL!	#NULL!	#NULL!	#NULL!	#NULL!	#NULL!	#NULL!	#NULL!	#NULL!	#NULL!	#NULL!	501	501	1	2	8	8	8	8	2	8	1	8	2	8	2	8	8	8
A988925002	A9889250	2011	1	1	2	A988	2	31	#NULL!	3	3	4	2	2340.87	2783.89	#NULL!	#NULL!	7509.5	5921.73	5050.54	#NULL!	#NULL!	#NULL!	#NULL!	15002.2	#NULL!	#NULL!	#NULL!	#NULL!	#NULL!	#NULL!	501	501	1	1	2	8	8	8	2	8	1	8	2	8	1	2	1	1
A988925003	A9889250	2011	1	1	2	A988	1	8	#NULL!	3	3	1	#NULL!	2340.87	1924.55	#NULL!	#NULL!	#NULL!	3520.96	3436.59	#NULL!	#NULL!	#NULL!	#NULL!	#NULL!	#NULL!	#NULL!	#NULL!	#NULL!	#NULL!	#NULL!	501	501	1	2	8	8	8	8	8	8	8	8	8	8	2	8	8	8
A988925004	A9889250	2011	1	1	2	A988	1	6	76	3	3	1	#NULL!	2340.87	1924.55	#NULL!	#NULL!	#NULL!	3520.96	3436.59	#NULL!	#NULL!	#NULL!	#NULL!	#NULL!	#NULL!	#NULL!	#NULL!	#NULL!	#NULL!	#NULL!	501	501	1	2	8	8	8	8	8	8	8	8	8	8	2	8	8	8
A988928401	A9889284	2011	1	1	2	A988	2	75	#NULL!	2	1	1	7	2340.87	1523.96	#NULL!	#NULL!	4232.64	1514.44	1516.52	#NULL!	#NULL!	#NULL!	#NULL!	3842.27	#NULL!	#NULL!	#NULL!	#NULL!	#NULL!	#NULL!	501	501	1	2	8	2	8	8	2	8	1	8	2	8	2	8	8	8
A989919301	A9899193	2011	1	1	1	A989	2	58	#NULL!	1	1	3	7	7543.21	4693.63	#NULL!	#NULL!	14878.1	4422.27	5529.63	#NULL!	#NULL!	#NULL!	#NULL!	13376.8	#NULL!	#NULL!	#NULL!	#NULL!	#NULL!	#NULL!	512	517	1	2	8	2	8	8	2	8	1	8	2	8	2	8	8	8
A989920601	A9899206	2011	1	1	1	A989	1	36	#NULL!	4	4	4	2	7543.21	17442.8	#NULL!	#NULL!	43858.1	17489.8	20545.4	#NULL!	#NULL!	#NULL!	#NULL!	52183.6	#NULL!	#NULL!	#NULL!	#NULL!	#NULL!	#NULL!	512	517	1	2	8	8	8	8	2	8	1	8	2	8	2	8	8	8
A989920602	A9899206	2011	1	1	1	A989	2	35	#NULL!	4	4	3	1	7543.21	10033	#NULL!	#NULL!	27843.8	10528.2	12323.1	#NULL!	#NULL!	#NULL!	#NULL!	26798.8	#NULL!	#NULL!	#NULL!	#NULL!	#NULL!	#NULL!	512	517	1	2	8	8	8	8	2	8	1	8	1	2	2	8	8	8
A989920801	A9899208	2011	1	1	1	A989	1	32	#NULL!	4	4	4	5	7543.21	10096.9	18875.3	#NULL!	52707.3	10604.6	20456.2	#NULL!	#NULL!	24447.9	#NULL!	59786.6	#NULL!	114752	#NULL!	163669	#NULL!	#NULL!	512	517	1	2	8	8	8	8	2	8	1	8	2	8	2	8	8	8
A989920802	A9899208	2011	1	1	1	A989	2	31	#NULL!	4	4	4	2	7543.21	7951.94	15192.2	#NULL!	#NULL!	8457.45	10819.8	#NULL!	#NULL!	15922.9	#NULL!	#NULL!	#NULL!	#NULL!	#NULL!	#NULL!	#NULL!	#NULL!	512	517	1	2	8	8	8	8	2	8	1	8	2	8	2	8	8	8
A989921102	A9899211	2011	1	1	1	A989	2	49	#NULL!	3	4	4	7	7543.21	15305.8	#NULL!	10360.5	42778.9	14381.9	17719.4	#NULL!	10901.9	#NULL!	#NULL!	39988	24075.5	#NULL!	24565.1	#NULL!	#NULL!	#NULL!	512	517	1	2	8	2	8	8	2	8	1	8	2	8	2	8	8	8
A989921201	A9899212	2011	1	1	1	A989	2	84	#NULL!	2	1	1	7	7543.21	4353.06	#NULL!	9530.01	12090.2	4325.88	4331.8	#NULL!	9944.3	#NULL!	#NULL!	10975.1	25461.8	#NULL!	25379.7	#NULL!	#NULL!	#NULL!	512	517	1	2	8	2	8	8	1	2	1	8	1	1	2	8	8	8
A989921301	A9899213	2011	1	1	1	A989	1	89	#NULL!	3	2	1	7	7543.21	4197.3	#NULL!	#NULL!	11282.2	4123.85	4471.66	#NULL!	#NULL!	#NULL!	#NULL!	11418.6	#NULL!	#NULL!	#NULL!	#NULL!	#NULL!	#NULL!	512	517	1	2	8	2	8	8	2	8	2	3	2	8	1	1	1	1
A989921302	A9899213	2011	1	1	1	A989	2	76	#NULL!	3	2	1	7	7543.21	4353.06	#NULL!	19060	12090.2	4325.88	4331.8	#NULL!	19888.6	#NULL!	#NULL!	10975.1	50923.5	#NULL!	50759.4	#NULL!	#NULL!	#NULL!	512	517	1	2	8	2	8	8	2	8	1	8	2	8	2	8	8	8
A989921401	A9899214	2011	1	1	1	A989	2	49	#NULL!	2	2	3	6	7543.21	7652.91	14348.4	10360.5	21389.4	7190.94	8859.72	19959.3	10901.9	13979.6	20900.1	19994	24075.5	30922.1	24565.1	33223.4	47838.4	51002.5	512	517	1	2	8	2	8	8	2	8	1	8	2	8	2	8	8	8
A989922401	A9899224	2011	1	1	1	A989	1	46	#NULL!	1	1	3	5	7543.21	11343.2	37245.7	17022.6	51721	12680.1	18729.7	23058.8	20624.2	64262.2	29206.3	58368.1	51846.7	161612	64228.5	175712	60697.7	75983.2	512	517	1	2	8	2	8	8	2	8	1	8	2	8	2	8	8	8
A989922402	A9899224	2011	1	1	1	A989	2	37	#NULL!	1	1	3	7	7543.21	6688.68	#NULL!	#NULL!	24750.1	7018.8	8215.41	#NULL!	#NULL!	#NULL!	#NULL!	23821.2	#NULL!	#NULL!	#NULL!	#NULL!	#NULL!	#NULL!	512	517	1	2	8	8	8	8	2	8	1	8	2	8	2	8	8	8
A989922403	A9899224	2011	1	1	1	A989	2	14	#NULL!	1	1	1	#NULL!	7543.21	7775.37	#NULL!	#NULL!	#NULL!	8260.97	9295.07	#NULL!	#NULL!	#NULL!	#NULL!	#NULL!	#NULL!	#NULL!	#NULL!	#NULL!	#NULL!	#NULL!	512	517	1	2	8	8	8	8	8	8	1	8	2	8	2	8	8	8
A989922404	A9899224	2011	1	1	1	A989	1	12	#NULL!	1	1	1	#NULL!	7543.21	5475.38	#NULL!	#NULL!	27335.1	5619.42	8635.27	#NULL!	#NULL!	#NULL!	#NULL!	25675.6	#NULL!	#NULL!	#NULL!	#NULL!	#NULL!	#NULL!	512	517	1	1	2	8	8	8	8	8	1	8	2	8	2	8	8	8
A989922405	A9899224	2011	1	1	1	A989	1	2	26	1	1	1	#NULL!	7543.21	4513.45	#NULL!	#NULL!	#NULL!	4461.78	6338.64	#NULL!	#NULL!	#NULL!	#NULL!	#NULL!	#NULL!	#NULL!	#NULL!	#NULL!	#NULL!	#NULL!	512	517	1	8	8	8	8	8	8	8	8	8	8	8	8	8	8	8
A989923101	A9899231	2011	1	1	1	A989	1	84	#NULL!	3	2	1	7	7543.21	4197.3	#NULL!	#NULL!	22564.3	5498.46	5962.22	#NULL!	#NULL!	#NULL!	#NULL!	15224.8	#NULL!	#NULL!	#NULL!	#NULL!	#NULL!	#NULL!	512	517	1	2	8	1	2	1	1	2	2	3	1	1	2	8	8	8
A989923105	A9899231	2011	1	1	1	A989	2	18	#NULL!	2	2	2	7	7543.21	10342.2	13686.6	#NULL!	48468.4	14829	18434	#NULL!	#NULL!	25784.1	#NULL!	49240.6	#NULL!	46940.7	#NULL!	54000.6	#NULL!	#NULL!	512	517	1	2	8	8	8	8	8	8	1	8	2	8	2	8	8	8
A989923106	A9899231	2011	1	1	1	A989	1	14	#NULL!	2	2	1	#NULL!	7543.21	5475.38	11435.2	#NULL!	41002.7	7492.56	11513.7	#NULL!	#NULL!	19329.5	#NULL!	25675.6	#NULL!	38349.4	#NULL!	40609.5	#NULL!	#NULL!	512	517	1	2	8	8	8	8	8	8	1	8	2	8	2	8	8	8
A989923201	A9899232	2011	1	1	1	A989	1	86	#NULL!	1	1	#NULL!	#NULL!	7543.21	4197.3	#NULL!	#NULL!	11282.2	4123.85	4471.66	#NULL!	#NULL!	#NULL!	#NULL!	11418.6	#NULL!	#NULL!	#NULL!	#NULL!	#NULL!	#NULL!	512	517	1	2	8	1	1	1	2	8	4	1	1	2	2	8	8	8
A989923601	A9899236	2011	1	1	1	A989	1	61	#NULL!	2	2	2	5	7543.21	4962.99	8659.79	6444.64	14271.3	5675.17	5282.56	12615.5	7223.26	8868.79	13985.3	13826.9	16615	23289	18219.5	24075.8	31635.5	32511.5	512	517	1	1	1	2	8	8	2	8	1	8	2	8	1	2	1	2
A989923602	A9899236	2011	1	1	1	A989	2	58	#NULL!	1	2	2	7	7543.21	4693.63	10896.8	6280.59	14878.1	4422.27	5529.63	15425.9	6324.14	10769.6	15448.7	13376.8	16075.1	29312.2	15916.1	29600.4	43431	43166.2	512	517	1	1	2	2	8	8	1	1	2	3	2	8	2	8	8	8
A989923701	A9899237	2011	1	1	1	A989	1	55	#NULL!	1	2	2	5	7543.21	10759.6	15526.5	9089.66	20246.2	#NULL!	#NULL!	13863.5	#NULL!	#NULL!	#NULL!	#NULL!	21894.5	35283.3	#NULL!	#NULL!	32146.2	#NULL!	512	517	1	2	8	2	8	8	2	8	1	8	2	8	2	8	8	8
A989923702	A9899237	2011	1	1	1	A989	2	53	#NULL!	1	2	1	7	7543.21	9181.45	21272.3	7752.6	18552.9	17748.5	19438.1	19552.5	16110.3	42118.1	40977.3	46802.2	18749.3	46966.8	38109.9	95714.3	49163.3	99052.1	512	517	1	2	8	2	8	8	1	1	1	8	1	1	2	8	8	8
A989924101	A9899241	2011	1	1	1	A989	1	65	#NULL!	4	4	2	6	7543.21	3796.63	14786	7304.15	10002.4	4602.11	4902.54	23354.3	7961.15	15522.1	24363	10498.5	16004.6	32417.5	17367	36568.5	53553.3	56156.3	512	517	1	2	8	2	8	8	2	8	2	3	2	8	2	8	8	8
A989924102	A9899241	2011	1	1	1	A989	2	58	#NULL!	3	4	2	2	7543.21	4693.63	#NULL!	6280.59	14878.1	4422.27	5529.63	#NULL!	6324.14	#NULL!	#NULL!	13376.8	16075.1	#NULL!	15916.1	#NULL!	#NULL!	#NULL!	512	517	1	1	1	2	8	8	2	8	1	8	2	8	2	8	8	8
A989924801	A9899248	2011	1	1	1	A989	1	69	#NULL!	1	1	3	4	7543.21	3796.63	#NULL!	7304.15	10002.4	4602.11	4902.54	#NULL!	7961.15	#NULL!	#NULL!	10498.5	16004.6	#NULL!	17367	#NULL!	#NULL!	#NULL!	512	517	1	2	8	2	8	8	2	8	1	8	2	8	2	8	8	8
A989924802	A9899248	2011	1	1	1	A989	2	65	#NULL!	2	1	2	7	7543.21	4610.14	14056.2	5242.36	11847.3	6678.15	4345.22	31843.6	5936.23	15083.9	33732.9	11291.1	13368.6	33677.6	15114	36139.1	70385.7	75779.5	512	517	1	2	8	2	8	8	1	1	1	8	2	8	2	8	8	8
A989924803	A9899248	2011	1	1	1	A989	2	30	#NULL!	1	1	4	7	7543.21	7951.94	22788.4	#NULL!	21450.2	8457.45	10819.8	#NULL!	#NULL!	23884.4	#NULL!	21426.3	#NULL!	60879.5	#NULL!	60234	#NULL!	#NULL!	512	517	1	2	8	8	8	8	2	8	1	8	2	8	2	8	8	8
A989925501	A9899255	2011	1	1	1	A989	1	53	#NULL!	2	2	1	5	7543.21	9902.67	29694.3	11921.7	31501.4	11487.2	12658.2	39757.5	14428.2	32105.6	46088	29967.2	34397.8	70866	37094.7	70305.9	100508	104197	512	517	1	2	8	2	8	8	2	8	1	8	2	8	2	8	8	8
A989925502	A9899255	2011	1	1	1	A989	2	50	#NULL!	2	2	3	3	7543.21	6120.97	#NULL!	7752.6	18552.9	5916.17	6498.04	#NULL!	8055.16	#NULL!	#NULL!	15600.7	18749.3	#NULL!	19055	#NULL!	#NULL!	#NULL!	512	517	1	2	8	2	8	8	2	8	1	8	2	8	2	8	8	8
A989925503	A9899255	2011	1	1	1	A989	1	23	#NULL!	1	2	4	7	7543.21	12371.3	#NULL!	#NULL!	51511.1	16357.4	23766.3	#NULL!	#NULL!	#NULL!	#NULL!	63508	#NULL!	#NULL!	#NULL!	#NULL!	#NULL!	#NULL!	512	517	1	2	8	8	8	8	2	8	1	8	2	8	2	8	8	8
A989925504	A9899255	2011	1	1	1	A989	1	21	#NULL!	1	2	3	7	7543.21	12371.3	27976.6	#NULL!	51511.1	16357.4	23766.3	#NULL!	#NULL!	32883.4	#NULL!	63508	#NULL!	60095.1	#NULL!	72491.8	#NULL!	#NULL!	512	517	1	2	8	8	8	8	2	8	1	8	2	8	2	8	8	8
A989938302	A9899383	2011	1	1	1	A989	2	34	#NULL!	2	3	4	3	7543.21	11927.9	#NULL!	#NULL!	21450.2	11276.6	12983.8	#NULL!	#NULL!	#NULL!	#NULL!	26782.9	#NULL!	#NULL!	#NULL!	#NULL!	#NULL!	#NULL!	512	517	1	2	8	8	8	8	2	8	1	8	1	2	2	8	8	8
A989938303	A9899383	2011	1	1	1	A989	1	18	#NULL!	2	3	2	7	7543.21	14554.8	33389.9	#NULL!	29606.1	14467	18778.3	#NULL!	#NULL!	64280.1	#NULL!	41107.7	#NULL!	140710	#NULL!	167919	#NULL!	#NULL!	512	517	1	2	8	8	8	8	8	8	1	8	1	1	2	8	8	8
A989938304	A9899383	2011	1	1	1	A989	1	11	#NULL!	3	3	1	#NULL!	7543.21	8213.06	#NULL!	#NULL!	20501.3	7492.56	10362.3	#NULL!	#NULL!	#NULL!	#NULL!	24070.9	#NULL!	#NULL!	#NULL!	#NULL!	#NULL!	#NULL!	512	517	1	2	8	8	8	8	8	8	8	8	8	8	2	8	8	8
A989938305	A9899383	2011	1	1	1	A989	2	2	35	3	3	1	#NULL!	7543.21	6293.24	#NULL!	#NULL!	#NULL!	5371.07	7713.73	#NULL!	#NULL!	#NULL!	#NULL!	#NULL!	#NULL!	#NULL!	#NULL!	#NULL!	#NULL!	#NULL!	512	517	1	8	8	8	8	8	8	8	8	8	8	8	8	8	8	8
A989938306	A9899383	2011	1	1	1	A989	2	73	#NULL!	4	3	1	7	7543.21	6188.98	#NULL!	9530.01	12090.2	5285.72	5198.16	#NULL!	9944.3	#NULL!	#NULL!	13718.9	25461.8	#NULL!	25379.7	#NULL!	#NULL!	#NULL!	512	517	1	2	8	2	8	8	2	8	1	8	2	8	2	8	8	8
A990918701	A9909187	2011	1	1	1	A990	1	48	#NULL!	4	4	4	1	10587	11343.2	27934.2	17022.6	45665.4	12680.1	18729.7	46117.7	20624.2	44933.3	58412.5	54246.7	51846.7	89344.4	64228.5	114683	121395	151966	512	517	1	2	8	2	8	8	2	8	1	8	2	8	2	8	8	8
A990918702	A9909187	2011	1	1	1	A990	2	49	#NULL!	3	4	3	2	10587	7652.91	#NULL!	10360.5	21389.4	7190.94	8859.72	#NULL!	10901.9	#NULL!	#NULL!	19994	24075.5	#NULL!	24565.1	#NULL!	#NULL!	#NULL!	512	517	1	2	8	2	8	8	2	8	1	8	2	8	2	8	8	8
A990918703	A9909187	2011	1	1	1	A990	2	19	#NULL!	4	4	3	7	10587	10342.2	20529.9	#NULL!	33179.9	11121.8	13825.5	#NULL!	#NULL!	25784.1	#NULL!	36930.5	#NULL!	46940.7	#NULL!	54000.6	#NULL!	#NULL!	512	517	1	2	8	8	8	8	2	8	2	3	2	8	1	1	2	1
A990918704	A9909187	2011	1	1	1	A990	1	18	#NULL!	4	4	2	7	10587	9703.22	#NULL!	#NULL!	29606.1	10850.3	15648.6	#NULL!	#NULL!	#NULL!	#NULL!	32886.1	#NULL!	#NULL!	#NULL!	#NULL!	#NULL!	#NULL!	512	517	1	2	8	8	8	8	8	8	1	8	2	8	2	8	8	8
A990918901	A9909189	2011	1	1	1	A990	1	38	#NULL!	3	3	4	2	10587	11628.5	#NULL!	#NULL!	29238.7	11659.9	17051.7	#NULL!	#NULL!	#NULL!	#NULL!	34789.1	#NULL!	#NULL!	#NULL!	#NULL!	#NULL!	#NULL!	512	517	1	2	8	8	8	8	2	8	1	8	2	8	2	8	8	8
A990919101	A9909191	2011	1	1	1	A990	2	37	#NULL!	3	3	4	2	10587	6688.68	16119.2	#NULL!	18562.6	7018.8	8215.41	#NULL!	#NULL!	15916.8	#NULL!	17865.9	#NULL!	35916.9	#NULL!	38031.6	#NULL!	#NULL!	512	517	1	2	8	8	8	8	2	8	1	8	2	8	1	1	2	1
A990919603	A9909196	2011	1	1	1	A990	2	65	#NULL!	3	2	2	7	10587	13830.4	28112.4	10484.7	11847.3	18714.8	13035.7	31843.6	11872.5	30167.8	33732.9	33873.2	26737.2	67355.2	30228.1	72278.3	70385.7	75779.5	512	517	1	1	2	2	8	8	2	8	1	8	2	8	1	1	1	1
A990921701	A9909217	2011	1	1	1	A990	2	40	#NULL!	1	2	4	1	10587	8294.9	47927.6	11567.4	26828.5	19208.6	19635.6	67682	24879.3	42662	68900.8	55187.7	34217.3	119514	67122.3	125019	191948	206203	512	517	1	2	8	2	8	8	2	8	1	8	2	8	2	8	8	8
A990921702	A9909217	2011	1	1	1	A990	1	44	#NULL!	1	2	4	1	10587	13056.2	#NULL!	14486.6	36145.7	#NULL!	#NULL!	#NULL!	#NULL!	#NULL!	#NULL!	#NULL!	35955.1	#NULL!	#NULL!	#NULL!	#NULL!	#NULL!	512	517	1	2	8	2	8	8	2	8	1	8	2	8	2	8	8	8
A990921703	A9909217	2011	1	1	1	A990	2	69	#NULL!	3	2	1	6	10587	4610.14	#NULL!	5242.36	11847.3	#NULL!	#NULL!	#NULL!	#NULL!	#NULL!	#NULL!	#NULL!	13368.6	#NULL!	#NULL!	#NULL!	#NULL!	#NULL!	512	517	1	2	8	2	8	8	2	8	1	8	2	8	2	8	8	8
A990921901	A9909219	2011	1	1	1	A990	1	43	#NULL!	4	4	3	1	10587	13056.2	#NULL!	14486.6	36145.7	14396.3	18137.2	#NULL!	18947.9	#NULL!	#NULL!	48515.9	35955.1	#NULL!	50981.6	#NULL!	#NULL!	#NULL!	512	517	1	2	8	2	8	8	2	8	1	8	1	1	2	8	8	8
A990921902	A9909219	2011	1	1	1	A990	2	40	#NULL!	4	4	3	7	10587	8294.9	31951.7	11567.4	26828.5	8753.41	9103.08	45121.3	11133.4	42662	45933.8	25317.9	34217.3	119514	32697.5	125019	131170	137469	512	517	1	2	8	2	8	8	2	8	1	8	1	1	2	8	8	8
A990921903	A9909219	2011	1	1	1	A990	1	13	#NULL!	4	4	1	#NULL!	10587	5475.38	#NULL!	#NULL!	20501.3	5619.42	8635.27	#NULL!	#NULL!	#NULL!	#NULL!	19256.7	#NULL!	#NULL!	#NULL!	#NULL!	#NULL!	#NULL!	512	517	1	2	8	8	8	8	8	8	1	8	2	8	2	8	8	8
A990922201	A9909222	2011	1	1	1	A990	1	31	#NULL!	2	2	3	6	10587	10096.9	18875.3	#NULL!	44878.2	10604.6	20456.2	#NULL!	#NULL!	24447.9	#NULL!	59265.4	#NULL!	57376	#NULL!	81834.6	#NULL!	#NULL!	512	517	1	2	8	8	8	8	2	8	1	8	2	8	1	1	2	1
A990922202	A9909222	2011	1	1	1	A990	2	28	#NULL!	2	2	4	7	10587	13026.4	10585.5	#NULL!	31850.8	12316.6	12886.5	#NULL!	#NULL!	12216.7	#NULL!	32707.5	#NULL!	29227.9	#NULL!	30265.2	#NULL!	#NULL!	512	517	1	2	8	8	8	8	2	8	1	8	2	8	2	8	8	8
A990923801	A9909238	2011	1	1	1	A990	1	45	#NULL!	4	4	4	2	10587	11343.2	18622.8	17022.6	45665.4	12680.1	18729.7	23058.8	20624.2	22466.7	29206.3	54246.7	51846.7	44672.2	64228.5	57341.3	60697.7	75983.2	512	517	1	2	8	2	8	8	1	1	1	8	2	8	1	1	1	1
A990924202	A9909242	2011	1	1	1	A990	2	31	#NULL!	3	3	4	7	10587	15903.9	30384.5	#NULL!	42900.5	16914.9	16229.7	#NULL!	#NULL!	31845.8	#NULL!	42852.6	#NULL!	81172.6	#NULL!	80312	#NULL!	#NULL!	512	517	1	2	8	8	8	8	2	8	1	8	2	8	2	8	8	8
A990924203	A9909242	2011	1	1	1	A990	2	1	16	4	3	1	#NULL!	10587	8390.98	#NULL!	#NULL!	#NULL!	8056.61	9642.16	#NULL!	#NULL!	#NULL!	#NULL!	#NULL!	#NULL!	#NULL!	#NULL!	#NULL!	#NULL!	#NULL!	512	517	1	8	8	8	8	8	8	8	8	8	8	8	8	8	8	8
A990924501	A9909245	2011	1	1	1	A990	1	35	#NULL!	3	3	4	2	10587	11628.5	30543.3	#NULL!	29238.7	11659.9	17051.7	#NULL!	#NULL!	39614.7	#NULL!	34789.1	#NULL!	73871.7	#NULL!	98526	#NULL!	#NULL!	512	517	1	2	8	8	8	8	2	8	1	8	2	8	2	8	8	8
A990924502	A9909245	2011	1	1	1	A990	2	33	#NULL!	3	3	4	1	10587	7951.94	#NULL!	#NULL!	21450.2	8457.45	10819.8	#NULL!	#NULL!	#NULL!	#NULL!	21426.3	#NULL!	#NULL!	#NULL!	#NULL!	#NULL!	#NULL!	512	517	1	2	8	8	8	8	2	8	1	8	2	8	2	8	8	8
A990924503	A9909245	2011	1	1	1	A990	1	5	71	3	3	1	#NULL!	10587	5497.32	#NULL!	#NULL!	#NULL!	5028.65	7362.23	#NULL!	#NULL!	#NULL!	#NULL!	#NULL!	#NULL!	#NULL!	#NULL!	#NULL!	#NULL!	#NULL!	512	517	1	2	8	8	8	8	8	8	8	8	8	8	8	8	8	8
A990924504	A9909245	2011	1	1	1	A990	1	3	38	3	3	1	#NULL!	10587	4513.45	#NULL!	#NULL!	#NULL!	4461.78	6338.64	#NULL!	#NULL!	#NULL!	#NULL!	#NULL!	#NULL!	#NULL!	#NULL!	#NULL!	#NULL!	#NULL!	512	517	1	8	8	8	8	8	8	8	8	8	8	8	8	8	8	8
A990925501	A9909255	2011	1	1	1	A990	1	51	#NULL!	3	4	4	3	10587	9902.67	29694.3	11921.7	31501.4	11487.2	12658.2	39757.5	14428.2	32105.6	46088	29967.2	34397.8	70866	37094.7	70305.9	100508	104197	512	517	1	2	8	2	8	8	2	8	1	8	2	8	2	8	8	8
A990925502	A9909255	2011	1	1	1	A990	2	49	#NULL!	3	4	3	7	10587	7652.91	#NULL!	10360.5	21389.4	7190.94	8859.72	#NULL!	10901.9	#NULL!	#NULL!	19994	24075.5	#NULL!	24565.1	#NULL!	#NULL!	#NULL!	512	517	1	1	2	2	8	8	2	8	1	8	2	8	1	1	1	1
A990925503	A9909255	2011	1	1	1	A990	1	22	#NULL!	3	4	3	7	10587	12371.3	27976.6	#NULL!	51511.1	16357.4	23766.3	#NULL!	#NULL!	32883.4	#NULL!	63508	#NULL!	60095.1	#NULL!	72491.8	#NULL!	#NULL!	512	517	1	1	2	8	8	8	1	1	1	8	1	1	1	1	1	1
A990925504	A9909255	2011	1	1	1	A990	2	20	#NULL!	3	4	3	3	10587	11491.7	#NULL!	#NULL!	34283	15484.4	15553.2	#NULL!	#NULL!	#NULL!	#NULL!	32573.5	#NULL!	#NULL!	#NULL!	#NULL!	#NULL!	#NULL!	512	517	1	1	2	8	8	8	2	8	1	8	1	1	2	8	8	8
A990938302	A9909383	2011	1	1	1	A990	2	38	#NULL!	3	3	3	7	10587	13377.4	#NULL!	#NULL!	24750.1	10528.2	10953.9	#NULL!	#NULL!	#NULL!	#NULL!	23821.2	#NULL!	#NULL!	#NULL!	#NULL!	#NULL!	#NULL!	512	517	1	2	8	8	8	8	2	8	4	3	2	8	2	8	8	8
A990938303	A9909383	2011	1	1	1	A990	2	13	#NULL!	3	3	1	#NULL!	10587	15550.7	#NULL!	#NULL!	28160.7	12391.5	12393.4	#NULL!	#NULL!	#NULL!	#NULL!	26911.9	#NULL!	#NULL!	#NULL!	#NULL!	#NULL!	#NULL!	512	517	1	2	8	8	8	8	8	8	1	8	2	8	2	8	8	8
A990938304	A9909383	2011	1	1	1	A990	1	11	#NULL!	3	3	1	#NULL!	10587	10950.8	22870.3	#NULL!	27335.1	8429.14	11513.7	#NULL!	#NULL!	38659	#NULL!	25675.6	#NULL!	76698.8	#NULL!	81219	#NULL!	#NULL!	512	517	1	2	8	8	8	8	8	8	8	8	8	8	2	8	8	8
B921927102	B9219271	2011	2	1	2	B921	1	56	#NULL!	2	3	2	7	3139.9	3247.3	#NULL!	6485.23	#NULL!	4637.81	2985.6	#NULL!	7497.72	#NULL!	#NULL!	#NULL!	#NULL!	#NULL!	#NULL!	#NULL!	#NULL!	#NULL!	502	502	1	1	1	1	3	2	2	8	1	8	2	8	1	1	2	2
B921927103	B9219271	2011	2	1	2	B921	2	82	#NULL!	4	3	1	7	3139.9	2619.1	#NULL!	#NULL!	#NULL!	3179.91	1545.31	#NULL!	#NULL!	#NULL!	#NULL!	#NULL!	#NULL!	#NULL!	#NULL!	#NULL!	#NULL!	#NULL!	502	502	1	2	8	1	3	1	2	8	2	3	2	8	1	1	1	1
B921927601	B9219276	2011	2	1	2	B921	1	62	#NULL!	2	2	3	2	3139.9	2623.21	#NULL!	#NULL!	#NULL!	2687.15	1884.48	#NULL!	#NULL!	#NULL!	#NULL!	#NULL!	#NULL!	#NULL!	#NULL!	#NULL!	#NULL!	#NULL!	502	502	1	2	8	2	8	8	2	8	2	3	1	2	2	8	8	8
B921927602	B9219276	2011	2	1	2	B921	2	62	#NULL!	3	2	2	7	3139.9	1951.54	#NULL!	3758.69	#NULL!	2317.3	1685.12	#NULL!	3928.46	#NULL!	#NULL!	#NULL!	#NULL!	#NULL!	#NULL!	#NULL!	#NULL!	#NULL!	502	502	1	2	8	2	8	8	2	8	1	8	2	8	2	8	8	8
B921928901	B9219289	2011	2	1	2	B921	1	55	#NULL!	2	3	1	6	3139.9	3247.3	7385.19	3242.62	#NULL!	4637.81	2985.6	9891.21	3748.86	8156.29	10924.2	#NULL!	#NULL!	#NULL!	#NULL!	#NULL!	#NULL!	#NULL!	502	502	1	2	8	2	8	8	2	8	1	8	2	8	1	1	1	1
B921928902	B9219289	2011	2	1	2	B921	2	49	#NULL!	2	3	2	7	3139.9	3687.24	#NULL!	3695.97	#NULL!	3817.02	3160.59	#NULL!	3889.11	#NULL!	#NULL!	#NULL!	#NULL!	#NULL!	#NULL!	#NULL!	#NULL!	#NULL!	502	502	1	2	8	2	8	8	2	8	1	8	2	8	2	8	8	8
B921929101	B9219291	2011	2	1	2	B921	1	40	#NULL!	3	3	4	1	3139.9	4323.69	#NULL!	10335.8	#NULL!	4962.65	6470.21	#NULL!	13518.8	#NULL!	#NULL!	#NULL!	#NULL!	#NULL!	#NULL!	#NULL!	#NULL!	#NULL!	502	502	1	2	8	2	8	8	2	8	1	8	2	8	2	8	8	8
B921929102	B9219291	2011	2	1	2	B921	2	40	#NULL!	2	3	4	7	3139.9	2800.91	#NULL!	#NULL!	#NULL!	2238.41	3247.4	#NULL!	#NULL!	#NULL!	#NULL!	#NULL!	#NULL!	#NULL!	#NULL!	#NULL!	#NULL!	#NULL!	502	502	1	2	8	2	8	8	2	8	1	8	2	8	2	8	8	8
B921929103	B9219291	2011	2	1	2	B921	1	5	61	3	3	1	#NULL!	3139.9	1696.49	#NULL!	#NULL!	#NULL!	1527.47	2626.38	#NULL!	#NULL!	#NULL!	#NULL!	#NULL!	#NULL!	#NULL!	#NULL!	#NULL!	#NULL!	#NULL!	502	502	1	1	2	8	8	8	8	8	8	8	8	8	8	8	8	8
B921929104	B9219291	2011	2	1	2	B921	1	2	33	3	3	1	#NULL!	3139.9	1858.62	#NULL!	#NULL!	#NULL!	1129.46	2261.23	#NULL!	#NULL!	#NULL!	#NULL!	#NULL!	#NULL!	#NULL!	#NULL!	#NULL!	#NULL!	#NULL!	502	502	1	8	8	8	8	8	8	8	8	8	8	8	8	8	8	8
B921929501	B9219295	2011	2	1	2	B921	1	55	#NULL!	4	4	4	3	3139.9	4870.95	11077.8	3242.62	#NULL!	4637.81	4478.41	9891.21	3748.86	12234.4	10924.2	#NULL!	#NULL!	#NULL!	#NULL!	#NULL!	#NULL!	#NULL!	502	502	1	2	8	2	8	8	2	8	1	8	2	8	1	1	1	1
B921929502	B9219295	2011	2	1	2	B921	2	53	#NULL!	4	4	3	3	3139.9	4693.25	#NULL!	2765.64	#NULL!	3031.78	3477.13	#NULL!	2873.57	#NULL!	#NULL!	#NULL!	#NULL!	#NULL!	#NULL!	#NULL!	#NULL!	#NULL!	502	502	1	2	8	2	8	8	2	8	1	8	2	8	1	1	1	1
B921930001	B9219300	2011	2	1	2	B921	1	50	#NULL!	4	4	4	2	3139.9	6148.41	#NULL!	4252.9	#NULL!	7595.26	4515.65	#NULL!	5147.06	#NULL!	#NULL!	#NULL!	#NULL!	#NULL!	#NULL!	#NULL!	#NULL!	#NULL!	502	502	1	2	8	2	8	8	2	8	1	8	2	8	2	8	8	8
B921930002	B9219300	2011	2	1	2	B921	2	49	#NULL!	4	4	3	7	3139.9	3687.24	7677.91	3695.97	#NULL!	3817.02	3160.59	14240.4	3889.11	7480.54	14911.6	#NULL!	#NULL!	#NULL!	#NULL!	#NULL!	#NULL!	#NULL!	502	502	1	2	8	2	8	8	1	2	2	3	1	1	1	2	1	1
B921930003	B9219300	2011	2	1	2	B921	2	25	#NULL!	4	4	4	7	3139.9	3653.53	5664.33	#NULL!	#NULL!	3369.45	4597.08	#NULL!	#NULL!	6537.23	#NULL!	#NULL!	#NULL!	#NULL!	#NULL!	#NULL!	#NULL!	#NULL!	502	502	1	2	8	8	8	8	2	8	1	8	2	8	2	8	8	8
B921931301	B9219313	2011	2	1	2	B921	1	54	#NULL!	#NULL!	#NULL!	#NULL!	#NULL!	3139.9	9222.61	#NULL!	8505.81	#NULL!	7595.26	6773.48	#NULL!	10294.1	#NULL!	#NULL!	#NULL!	#NULL!	#NULL!	#NULL!	#NULL!	#NULL!	#NULL!	502	502	1	2	8	2	8	8	2	8	1	8	2	8	2	8	8	8
B921932501	B9219325	2011	2	1	2	B921	1	48	#NULL!	3	3	4	2	3139.9	5426.25	8857.93	6072.57	#NULL!	4121.24	6681.57	16451.9	7357.41	10686.3	20837.9	#NULL!	#NULL!	#NULL!	#NULL!	#NULL!	#NULL!	#NULL!	502	502	1	2	8	2	8	8	2	8	2	3	2	8	2	8	8	8
B921932502	B9219325	2011	2	1	2	B921	2	45	#NULL!	3	3	4	2	3139.9	3687.24	#NULL!	3695.97	#NULL!	3817.02	3160.59	#NULL!	3889.11	#NULL!	#NULL!	#NULL!	#NULL!	#NULL!	#NULL!	#NULL!	#NULL!	#NULL!	502	502	1	2	8	1	3	2	2	8	1	8	2	8	1	1	2	2
B921932503	B9219325	2011	2	1	2	B921	1	22	#NULL!	3	3	3	7	3139.9	5340.36	6653.52	#NULL!	#NULL!	5377.57	8919.73	#NULL!	#NULL!	7820.47	#NULL!	#NULL!	#NULL!	#NULL!	#NULL!	#NULL!	#NULL!	#NULL!	502	502	1	2	8	8	8	8	2	8	1	8	2	8	2	8	8	8
B921932504	B9219325	2011	2	1	2	B921	2	19	#NULL!	3	3	3	3	3139.9	4111.69	6510.01	#NULL!	#NULL!	4051.68	4932.06	#NULL!	#NULL!	6132.08	#NULL!	#NULL!	#NULL!	#NULL!	#NULL!	#NULL!	#NULL!	#NULL!	502	502	1	2	8	8	8	8	2	8	1	8	2	8	2	8	8	8
B921933101	B9219331	2011	2	1	2	B921	1	35	#NULL!	3	3	4	5	3139.9	7518.87	8171.93	#NULL!	#NULL!	#NULL!	#NULL!	#NULL!	#NULL!	#NULL!	#NULL!	#NULL!	#NULL!	#NULL!	#NULL!	#NULL!	#NULL!	#NULL!	502	502	1	2	8	8	8	8	2	8	1	8	2	8	2	8	8	8
B921933102	B9219331	2011	2	1	2	B921	2	36	#NULL!	2	3	3	3	3139.9	2262.16	#NULL!	#NULL!	#NULL!	7304.91	5861.48	#NULL!	#NULL!	#NULL!	#NULL!	#NULL!	#NULL!	#NULL!	#NULL!	#NULL!	#NULL!	#NULL!	502	502	1	2	8	8	8	8	2	8	1	8	2	8	2	8	8	8
B921933103	B9219331	2011	2	1	2	B921	1	9	#NULL!	3	3	1	#NULL!	3139.9	1696.49	#NULL!	#NULL!	#NULL!	4582.41	5252.76	#NULL!	#NULL!	#NULL!	#NULL!	#NULL!	#NULL!	#NULL!	#NULL!	#NULL!	#NULL!	#NULL!	502	502	1	2	8	8	8	8	8	8	8	8	8	8	1	1	1	1
B921933104	B9219331	2011	2	1	2	B921	2	63	#NULL!	3	3	#NULL!	#NULL!	3139.9	1951.54	4705.27	1879.35	#NULL!	#NULL!	#NULL!	4450.43	#NULL!	#NULL!	#NULL!	#NULL!	#NULL!	#NULL!	#NULL!	#NULL!	#NULL!	#NULL!	502	502	1	9	9	2	8	8	2	8	1	8	2	8	2	8	8	8
B921933701	B9219337	2011	2	1	2	B921	1	61	#NULL!	2	2	4	7	3139.9	2623.21	#NULL!	#NULL!	#NULL!	2687.15	1884.48	#NULL!	#NULL!	#NULL!	#NULL!	#NULL!	#NULL!	#NULL!	#NULL!	#NULL!	#NULL!	#NULL!	502	502	1	1	2	2	8	8	2	8	1	8	2	8	2	8	8	8
B921933702	B9219337	2011	2	1	2	B921	2	56	#NULL!	2	2	3	7	3139.9	2185.45	7774.58	#NULL!	#NULL!	3000.59	1972.62	#NULL!	#NULL!	7683.8	#NULL!	#NULL!	#NULL!	#NULL!	#NULL!	#NULL!	#NULL!	#NULL!	502	502	1	2	8	2	8	8	2	8	1	8	2	8	2	8	8	8
B921934401	B9219344	2011	2	1	2	B921	1	71	#NULL!	1	1	3	7	3139.9	1662.89	#NULL!	2809.31	#NULL!	1805.97	1595.21	#NULL!	2931.37	#NULL!	#NULL!	#NULL!	#NULL!	#NULL!	#NULL!	#NULL!	#NULL!	#NULL!	502	502	1	2	8	1	3	2	2	8	1	8	2	8	2	8	8	8
B921934402	B9219344	2011	2	1	2	B921	2	70	#NULL!	1	1	1	7	3139.9	1562.19	#NULL!	3399.7	#NULL!	1831.83	1545.31	#NULL!	3547.5	#NULL!	#NULL!	#NULL!	#NULL!	#NULL!	#NULL!	#NULL!	#NULL!	#NULL!	502	502	1	2	8	2	8	8	2	8	2	3	2	8	1	1	1	1
B921934901	B9219349	2011	2	1	2	B921	2	38	#NULL!	3	3	4	2	3139.9	2262.16	11500.7	#NULL!	#NULL!	2434.97	2930.74	#NULL!	#NULL!	11356.2	#NULL!	#NULL!	#NULL!	#NULL!	#NULL!	#NULL!	#NULL!	#NULL!	502	502	1	2	8	8	8	8	1	2	1	8	2	8	2	8	8	8
B921934902	B9219349	2011	2	1	2	B921	1	38	#NULL!	3	3	4	1	3139.9	7518.87	#NULL!	#NULL!	#NULL!	11065.4	6082.97	#NULL!	#NULL!	#NULL!	#NULL!	#NULL!	#NULL!	#NULL!	#NULL!	#NULL!	#NULL!	#NULL!	502	502	1	2	8	8	8	8	2	8	1	8	2	8	2	8	8	8
B921934903	B9219349	2011	2	1	2	B921	1	8	#NULL!	3	3	1	#NULL!	3139.9	1696.49	#NULL!	#NULL!	#NULL!	1527.47	2626.38	#NULL!	#NULL!	#NULL!	#NULL!	#NULL!	#NULL!	#NULL!	#NULL!	#NULL!	#NULL!	#NULL!	502	502	1	2	8	8	8	8	8	8	8	8	8	8	2	8	8	8
B921934904	B9219349	2011	2	1	2	B921	2	6	83	3	3	1	#NULL!	3139.9	2968.43	#NULL!	#NULL!	#NULL!	2555.74	2549.1	#NULL!	#NULL!	#NULL!	#NULL!	#NULL!	#NULL!	#NULL!	#NULL!	#NULL!	#NULL!	#NULL!	502	502	1	2	8	8	8	8	8	8	8	8	8	8	2	8	8	8
B921935701	B9219357	2011	2	1	2	B921	1	57	#NULL!	2	3	3	5	3139.9	3247.3	#NULL!	3242.62	#NULL!	4637.81	2985.6	#NULL!	3748.86	#NULL!	#NULL!	#NULL!	#NULL!	#NULL!	#NULL!	#NULL!	#NULL!	#NULL!	502	502	1	2	8	2	8	8	2	8	1	8	2	8	2	8	8	8
B921935702	B9219357	2011	2	1	2	B921	2	54	#NULL!	2	3	2	7	3139.9	3128.83	#NULL!	2765.64	#NULL!	3031.78	2318.09	#NULL!	2873.57	#NULL!	#NULL!	#NULL!	#NULL!	#NULL!	#NULL!	#NULL!	#NULL!	#NULL!	502	502	1	2	8	2	8	8	2	8	1	8	2	8	2	8	8	8
B921935703	B9219357	2011	2	1	2	B921	2	29	#NULL!	2	3	#NULL!	#NULL!	3139.9	3653.53	#NULL!	#NULL!	#NULL!	3369.45	4597.08	#NULL!	#NULL!	#NULL!	#NULL!	#NULL!	#NULL!	#NULL!	#NULL!	#NULL!	#NULL!	#NULL!	502	502	1	2	8	8	8	8	2	8	1	8	2	8	2	8	8	8
B921936101	B9219361	2011	2	1	2	B921	1	62	#NULL!	1	2	3	7	3139.9	2623.21	6178.53	4598.08	#NULL!	2687.15	1884.48	9000.84	5153.6	6327.65	9978.12	#NULL!	#NULL!	#NULL!	#NULL!	#NULL!	#NULL!	#NULL!	502	502	1	2	8	2	8	8	2	8	2	3	1	1	2	8	8	8
B921936102	B9219361	2011	2	1	2	B921	2	60	#NULL!	2	2	3	7	3139.9	1951.54	#NULL!	#NULL!	#NULL!	2317.3	1685.12	#NULL!	#NULL!	#NULL!	#NULL!	#NULL!	#NULL!	#NULL!	#NULL!	#NULL!	#NULL!	#NULL!	502	502	1	2	8	2	8	8	2	8	1	8	2	8	2	8	8	8
B921936702	B9219367	2011	2	1	2	B921	2	51	#NULL!	3	3	2	7	3139.9	3911.04	#NULL!	5531.27	#NULL!	5052.97	3863.48	#NULL!	5747.14	#NULL!	#NULL!	#NULL!	#NULL!	#NULL!	#NULL!	#NULL!	#NULL!	#NULL!	502	502	1	2	8	2	8	8	1	1	1	8	2	8	2	8	8	8
B921936703	B9219367	2011	2	1	2	B921	2	27	#NULL!	3	3	4	2	3139.9	4566.91	#NULL!	#NULL!	#NULL!	#NULL!	#NULL!	#NULL!	#NULL!	#NULL!	#NULL!	#NULL!	#NULL!	#NULL!	#NULL!	#NULL!	#NULL!	#NULL!	502	502	1	2	8	8	8	8	2	8	1	8	2	8	2	8	8	8
B921936704	B9219367	2011	2	1	2	B921	2	24	#NULL!	3	3	4	1	3139.9	9764.36	21012	#NULL!	#NULL!	10447.4	9247.34	#NULL!	#NULL!	23908.4	#NULL!	#NULL!	#NULL!	#NULL!	#NULL!	#NULL!	#NULL!	#NULL!	502	502	1	1	2	8	8	8	2	8	1	8	2	8	1	1	2	1
B921936705	B9219367	2011	2	1	2	B921	1	22	#NULL!	3	3	3	6	3139.9	6675.45	#NULL!	#NULL!	#NULL!	8962.61	14866.2	#NULL!	#NULL!	#NULL!	#NULL!	#NULL!	#NULL!	#NULL!	#NULL!	#NULL!	#NULL!	#NULL!	502	502	1	2	8	8	8	8	2	8	1	8	2	8	2	8	8	8
B921937901	B9219379	2011	2	1	2	B921	1	72	#NULL!	3	2	3	7	3139.9	1662.89	#NULL!	2809.31	#NULL!	1805.97	1595.21	#NULL!	2931.37	#NULL!	#NULL!	#NULL!	#NULL!	#NULL!	#NULL!	#NULL!	#NULL!	#NULL!	502	502	1	1	2	2	8	8	2	8	1	8	2	8	1	1	2	2
B921937902	B9219379	2011	2	1	2	B921	2	64	#NULL!	2	2	1	7	3139.9	1951.54	#NULL!	1879.35	#NULL!	2317.3	1685.12	#NULL!	1964.23	#NULL!	#NULL!	#NULL!	#NULL!	#NULL!	#NULL!	#NULL!	#NULL!	#NULL!	502	502	1	2	8	2	8	8	2	8	1	8	2	8	2	8	8	8
B922919303	B9229193	2011	2	1	1	B922	1	81	#NULL!	1	1	4	7	7825.74	16381.6	#NULL!	14740.6	#NULL!	18694.6	10462.7	#NULL!	15381.1	#NULL!	#NULL!	#NULL!	#NULL!	#NULL!	#NULL!	#NULL!	#NULL!	#NULL!	513	518	1	2	8	2	8	8	2	8	1	8	2	8	2	8	8	8
B922919304	B9229193	2011	2	1	1	B922	2	73	#NULL!	1	1	3	7	7825.74	8196.92	#NULL!	17838.4	#NULL!	12014.6	10135.4	#NULL!	18613.9	#NULL!	#NULL!	#NULL!	#NULL!	#NULL!	#NULL!	#NULL!	#NULL!	#NULL!	513	518	1	2	8	2	8	8	2	8	1	8	1	1	2	8	8	8
B922919701	B9229197	2011	2	1	1	B922	2	55	#NULL!	1	1	1	3	7825.74	5733.6	#NULL!	5878.06	#NULL!	7872.14	5175.23	#NULL!	5918.82	#NULL!	#NULL!	#NULL!	#NULL!	#NULL!	#NULL!	#NULL!	#NULL!	#NULL!	513	518	1	2	8	2	8	8	2	8	1	8	2	8	1	1	1	1
B922920001	B9229200	2011	2	1	1	B922	1	52	#NULL!	#NULL!	#NULL!	3	1	7825.74	16130.5	#NULL!	22315.2	#NULL!	19926.4	11846.9	#NULL!	25271.5	#NULL!	#NULL!	#NULL!	#NULL!	#NULL!	#NULL!	#NULL!	#NULL!	#NULL!	513	518	1	2	8	2	8	8	2	8	1	8	2	8	2	8	8	8
B922920002	B9229200	2011	2	1	1	B922	2	52	#NULL!	#NULL!	#NULL!	#NULL!	#NULL!	7825.74	8208.58	#NULL!	#NULL!	#NULL!	7953.97	6081.57	#NULL!	#NULL!	#NULL!	#NULL!	#NULL!	#NULL!	#NULL!	#NULL!	#NULL!	#NULL!	#NULL!	513	518	1	2	8	2	8	8	2	8	2	3	2	8	2	8	8	8
B922920003	B9229200	2011	2	1	1	B922	1	21	#NULL!	#NULL!	#NULL!	3	1	7825.74	14010.6	39275.3	#NULL!	#NULL!	14108.2	23401.2	#NULL!	#NULL!	30775.8	#NULL!	#NULL!	#NULL!	#NULL!	#NULL!	#NULL!	#NULL!	#NULL!	513	518	1	2	8	8	8	8	2	8	1	8	2	8	2	8	8	8
B922920004	B9229200	2011	2	1	1	B922	2	17	#NULL!	#NULL!	#NULL!	2	7	7825.74	10787.1	38428.2	#NULL!	#NULL!	10629.7	12939.4	#NULL!	#NULL!	24131.5	#NULL!	#NULL!	#NULL!	#NULL!	#NULL!	#NULL!	#NULL!	#NULL!	513	518	1	2	8	8	8	8	8	8	1	8	1	1	2	8	8	8
B922920101	B9229201	2011	2	1	1	B922	1	47	#NULL!	2	2	4	5	7825.74	14235.9	17429.3	15931.6	#NULL!	10812.2	17529.3	21581	19302.4	42053.5	27334.4	#NULL!	#NULL!	#NULL!	#NULL!	#NULL!	#NULL!	#NULL!	513	518	1	2	8	2	8	8	2	8	1	8	2	8	2	8	8	8
B922920102	B9229201	2011	2	1	1	B922	1	14	#NULL!	2	2	1	#NULL!	7825.74	10749.7	#NULL!	#NULL!	#NULL!	8384.76	8081.83	#NULL!	#NULL!	#NULL!	#NULL!	#NULL!	#NULL!	#NULL!	#NULL!	#NULL!	#NULL!	#NULL!	513	518	1	2	8	8	8	8	8	8	1	8	2	8	1	2	2	2
B922920201	B9229202	2011	2	1	1	B922	1	67	#NULL!	1	1	3	7	7825.74	5016.9	10378.8	6836.02	#NULL!	5243.6	4588.33	21857.5	7450.91	10895.5	22801.6	#NULL!	#NULL!	#NULL!	#NULL!	#NULL!	#NULL!	#NULL!	513	518	1	2	8	2	8	8	2	8	1	8	2	8	2	8	8	8
B922920202	B9229202	2011	2	1	1	B922	2	64	#NULL!	1	1	4	7	7825.74	5119.93	#NULL!	4930.52	#NULL!	6079.51	4420.96	#NULL!	5153.22	#NULL!	#NULL!	#NULL!	#NULL!	#NULL!	#NULL!	#NULL!	#NULL!	#NULL!	513	518	1	2	8	2	8	8	2	8	1	8	1	1	2	8	8	8
B922920203	B9229202	2011	2	1	1	B922	2	29	#NULL!	1	1	4	7	7825.74	9585.14	14860.5	#NULL!	#NULL!	8839.86	12060.6	#NULL!	#NULL!	17150.6	#NULL!	#NULL!	#NULL!	#NULL!	#NULL!	#NULL!	#NULL!	#NULL!	513	518	1	2	8	8	8	8	2	8	1	8	2	8	1	1	1	1
B922920301	B9229203	2011	2	1	1	B922	1	44	#NULL!	4	4	#NULL!	#NULL!	7825.74	11343.3	#NULL!	13558.1	#NULL!	13019.7	16974.8	#NULL!	17733.5	#NULL!	#NULL!	#NULL!	#NULL!	#NULL!	#NULL!	#NULL!	#NULL!	#NULL!	513	518	1	2	8	2	8	8	2	8	1	8	2	8	2	8	8	8
B922920302	B9229203	2011	2	1	1	B922	2	41	#NULL!	4	4	4	7	7825.74	7348.28	#NULL!	10826	#NULL!	5872.53	8519.65	#NULL!	10419.9	#NULL!	#NULL!	#NULL!	#NULL!	#NULL!	#NULL!	#NULL!	#NULL!	#NULL!	513	518	1	2	8	2	8	8	2	8	1	8	2	8	2	8	8	8
B922920303	B9229203	2011	2	1	1	B922	2	20	#NULL!	4	4	3	7	7825.74	18531.5	33075.4	#NULL!	#NULL!	16445.5	14556.4	#NULL!	#NULL!	25089.7	#NULL!	#NULL!	#NULL!	#NULL!	#NULL!	#NULL!	#NULL!	#NULL!	513	518	1	2	8	8	8	8	2	8	2	3	1	2	1	2	2	2
B922920304	B9229203	2011	2	1	1	B922	1	14	#NULL!	4	4	1	#NULL!	7825.74	10749.7	32106.8	#NULL!	#NULL!	8384.76	8081.83	#NULL!	#NULL!	18090.6	#NULL!	#NULL!	#NULL!	#NULL!	#NULL!	#NULL!	#NULL!	#NULL!	513	518	1	2	8	8	8	8	8	8	1	8	2	8	2	8	8	8
B922920402	B9229204	2011	2	1	1	B922	2	54	#NULL!	3	3	3	3	7825.74	18406	#NULL!	14511.5	#NULL!	19117	18244.7	#NULL!	15077.8	#NULL!	#NULL!	#NULL!	#NULL!	#NULL!	#NULL!	#NULL!	#NULL!	#NULL!	513	518	1	2	8	1	2	2	2	8	1	8	2	8	2	8	8	8
B922920601	B9229206	2011	2	1	1	B922	1	54	#NULL!	#NULL!	#NULL!	#NULL!	#NULL!	7825.74	20895.2	41686.7	22315.2	#NULL!	#NULL!	#NULL!	37209.4	#NULL!	#NULL!	#NULL!	#NULL!	#NULL!	#NULL!	#NULL!	#NULL!	#NULL!	#NULL!	513	518	1	2	8	2	8	8	2	8	1	8	2	8	2	8	8	8
B922920702	B9229207	2011	2	1	1	B922	2	38	#NULL!	1	2	4	7	7825.74	11869.7	30172.3	#NULL!	#NULL!	9582.32	9611.09	#NULL!	#NULL!	29793.4	#NULL!	#NULL!	#NULL!	#NULL!	#NULL!	#NULL!	#NULL!	#NULL!	513	518	1	2	8	8	8	8	2	8	1	8	1	1	1	1	2	1
B922920703	B9229207	2011	2	1	1	B922	2	13	#NULL!	1	2	1	#NULL!	7825.74	14691.3	24339.7	#NULL!	#NULL!	8846.74	10874.2	#NULL!	#NULL!	18996.6	#NULL!	#NULL!	#NULL!	#NULL!	#NULL!	#NULL!	#NULL!	#NULL!	513	518	1	2	8	8	8	8	8	8	1	8	1	1	1	1	1	1
B922920704	B9229207	2011	2	1	1	B922	2	11	#NULL!	1	2	1	#NULL!	7825.74	14691.3	#NULL!	#NULL!	#NULL!	8846.74	10874.2	#NULL!	#NULL!	#NULL!	#NULL!	#NULL!	#NULL!	#NULL!	#NULL!	#NULL!	#NULL!	#NULL!	513	518	1	2	8	8	8	8	8	8	8	8	8	8	2	8	8	8
B922920705	B9229207	2011	2	1	1	B922	1	7	#NULL!	1	2	1	#NULL!	7825.74	8901.58	#NULL!	#NULL!	#NULL!	6011.04	8612.97	#NULL!	#NULL!	#NULL!	#NULL!	#NULL!	#NULL!	#NULL!	#NULL!	#NULL!	#NULL!	#NULL!	513	518	1	2	8	8	8	8	8	8	8	8	8	8	2	8	8	8
B922921701	B9229217	2011	2	1	1	B922	2	69	#NULL!	1	1	1	7	7825.74	3486.32	8770.23	#NULL!	#NULL!	4731.68	4066.73	#NULL!	#NULL!	9411.44	#NULL!	#NULL!	#NULL!	#NULL!	#NULL!	#NULL!	#NULL!	#NULL!	513	518	1	2	8	2	8	8	2	8	1	8	2	8	2	8	8	8
B922921801	B9229218	2011	2	1	1	B922	1	65	#NULL!	1	1	1	7	7825.74	5016.9	#NULL!	#NULL!	#NULL!	#NULL!	#NULL!	#NULL!	#NULL!	#NULL!	#NULL!	#NULL!	#NULL!	#NULL!	#NULL!	#NULL!	#NULL!	#NULL!	513	518	1	2	8	2	8	8	2	8	1	8	2	8	2	8	8	8
B922922701	B9229227	2011	2	1	1	B922	1	58	#NULL!	4	4	3	3	7825.74	8519.38	#NULL!	#NULL!	#NULL!	12167.4	7832.82	#NULL!	#NULL!	#NULL!	#NULL!	#NULL!	#NULL!	#NULL!	#NULL!	#NULL!	#NULL!	#NULL!	513	518	1	2	8	2	8	8	2	8	1	8	2	8	2	8	8	8
B922922702	B9229227	2011	2	1	1	B922	2	54	#NULL!	4	4	3	3	7825.74	8208.58	26545.3	14511.5	#NULL!	7953.97	6081.57	36598.8	15077.8	26279.1	38351	#NULL!	#NULL!	#NULL!	#NULL!	#NULL!	#NULL!	#NULL!	513	518	1	2	8	2	8	8	2	8	1	8	2	8	2	8	8	8
B922923001	B9229230	2011	2	1	1	B922	2	69	#NULL!	#NULL!	#NULL!	#NULL!	#NULL!	7825.74	6972.65	#NULL!	9812.74	#NULL!	9463.36	8133.46	#NULL!	11111.5	#NULL!	#NULL!	#NULL!	#NULL!	#NULL!	#NULL!	#NULL!	#NULL!	#NULL!	513	518	1	2	8	2	8	8	2	8	2	3	2	8	2	8	8	8
B922924201	B9229242	2011	2	1	1	B922	2	70	#NULL!	3	2	1	7	7825.74	4098.46	#NULL!	8919.22	#NULL!	4805.86	4054.17	#NULL!	9306.96	#NULL!	#NULL!	#NULL!	#NULL!	#NULL!	#NULL!	#NULL!	#NULL!	#NULL!	513	518	1	2	8	2	8	8	2	8	1	8	2	8	1	1	1	1
B922924601	B9229246	2011	2	1	1	B922	2	44	#NULL!	1	2	4	1	7825.74	7348.28	14951.9	#NULL!	#NULL!	8808.8	12779.5	#NULL!	#NULL!	39927.7	#NULL!	#NULL!	#NULL!	#NULL!	#NULL!	#NULL!	#NULL!	#NULL!	513	518	1	2	8	2	8	8	2	8	1	8	2	8	2	8	8	8
B922924603	B9229246	2011	2	1	1	B922	1	18	#NULL!	1	2	3	3	7825.74	17840.2	15625	#NULL!	#NULL!	#NULL!	#NULL!	#NULL!	#NULL!	#NULL!	#NULL!	#NULL!	#NULL!	#NULL!	#NULL!	#NULL!	#NULL!	#NULL!	513	518	1	2	8	8	8	8	8	8	1	8	1	2	2	8	8	8
B922924604	B9229246	2011	2	1	1	B922	2	17	#NULL!	1	2	2	7	7825.74	10787.1	#NULL!	#NULL!	#NULL!	15944.5	19309.2	#NULL!	#NULL!	#NULL!	#NULL!	#NULL!	#NULL!	#NULL!	#NULL!	#NULL!	#NULL!	#NULL!	513	518	1	1	2	8	8	8	8	8	1	8	1	1	1	2	1	1
B922928401	B9229284	2011	2	1	1	B922	1	49	#NULL!	1	2	#NULL!	#NULL!	7825.74	18931.7	#NULL!	#NULL!	#NULL!	18938.7	20673.6	#NULL!	#NULL!	#NULL!	#NULL!	#NULL!	#NULL!	#NULL!	#NULL!	#NULL!	#NULL!	#NULL!	513	518	1	2	8	2	8	8	2	8	1	8	2	8	2	8	8	8
B922928402	B9229284	2011	2	1	1	B922	2	52	#NULL!	1	2	2	3	7825.74	16417.2	#NULL!	#NULL!	#NULL!	15907.9	15203.9	#NULL!	#NULL!	#NULL!	#NULL!	#NULL!	#NULL!	#NULL!	#NULL!	#NULL!	#NULL!	#NULL!	513	518	1	2	8	2	8	8	2	8	1	8	2	8	2	8	8	8
B923927401	B9239274	2011	2	1	1	B923	2	35	#NULL!	2	2	4	1	9414.42	5934.84	#NULL!	#NULL!	#NULL!	12776.4	15377.8	#NULL!	#NULL!	#NULL!	#NULL!	#NULL!	#NULL!	#NULL!	#NULL!	#NULL!	#NULL!	#NULL!	513	518	1	2	8	8	8	8	2	8	1	8	2	8	1	2	1	1
B923927402	B9239274	2011	2	1	1	B923	2	30	#NULL!	2	2	3	3	9414.42	16683.3	#NULL!	#NULL!	#NULL!	#NULL!	#NULL!	#NULL!	#NULL!	#NULL!	#NULL!	#NULL!	#NULL!	#NULL!	#NULL!	#NULL!	#NULL!	#NULL!	513	518	1	1	9	8	8	8	2	8	2	3	2	8	1	1	1	1
B923927701	B9239277	2011	2	1	1	B923	1	62	#NULL!	3	3	3	7	9414.42	6882.06	#NULL!	#NULL!	#NULL!	7049.81	4944	#NULL!	#NULL!	#NULL!	#NULL!	#NULL!	#NULL!	#NULL!	#NULL!	#NULL!	#NULL!	#NULL!	513	518	1	2	8	2	8	8	2	8	1	8	2	8	2	8	8	8
B923927702	B9239277	2011	2	1	1	B923	2	61	#NULL!	4	3	4	7	9414.42	5119.93	#NULL!	#NULL!	#NULL!	6079.51	4420.96	#NULL!	#NULL!	#NULL!	#NULL!	#NULL!	#NULL!	#NULL!	#NULL!	#NULL!	#NULL!	#NULL!	513	518	1	2	8	2	8	8	2	8	1	8	2	8	1	1	1	1
B923928001	B9239280	2011	2	1	1	B923	2	43	#NULL!	2	3	4	7	9414.42	14696.6	29903.9	21652.1	#NULL!	5872.53	12779.5	42229.5	20839.7	26618.5	42989.9	#NULL!	#NULL!	#NULL!	#NULL!	#NULL!	#NULL!	#NULL!	513	518	1	1	2	2	8	8	2	8	1	8	2	8	1	1	1	1
B923928003	B9239280	2011	2	1	1	B923	1	7	#NULL!	3	3	1	#NULL!	9414.42	8901.58	#NULL!	#NULL!	#NULL!	4007.36	10335.6	#NULL!	#NULL!	#NULL!	#NULL!	#NULL!	#NULL!	#NULL!	#NULL!	#NULL!	#NULL!	#NULL!	513	518	1	1	2	8	8	8	8	8	8	8	8	8	1	2	1	1
B923930401	B9239304	2011	2	1	1	B923	1	69	#NULL!	1	1	3	7	9414.42	5016.9	13838.4	6836.02	#NULL!	5243.6	4588.33	21857.5	7450.91	14527.3	22801.6	#NULL!	#NULL!	#NULL!	#NULL!	#NULL!	#NULL!	#NULL!	513	518	1	2	8	2	8	8	2	8	1	8	2	8	2	8	8	8
B923930402	B9239304	2011	2	1	1	B923	2	63	#NULL!	1	1	1	6	9414.42	5119.93	#NULL!	4930.52	#NULL!	6079.51	4420.96	#NULL!	5153.22	#NULL!	#NULL!	#NULL!	#NULL!	#NULL!	#NULL!	#NULL!	#NULL!	#NULL!	513	518	1	2	8	2	8	8	2	8	1	8	2	8	2	8	8	8
B923932102	B9239321	2011	2	1	1	B923	2	31	#NULL!	3	3	4	2	9414.42	19676.4	#NULL!	#NULL!	#NULL!	20513.1	13501.8	#NULL!	#NULL!	#NULL!	#NULL!	#NULL!	#NULL!	#NULL!	#NULL!	#NULL!	#NULL!	#NULL!	513	518	1	1	1	8	8	8	2	8	1	8	2	8	1	1	2	1
B923932103	B9239321	2011	2	1	1	B923	2	5	69	3	3	1	#NULL!	9414.42	15575.5	#NULL!	#NULL!	#NULL!	13410.1	8916.86	#NULL!	#NULL!	#NULL!	#NULL!	#NULL!	#NULL!	#NULL!	#NULL!	#NULL!	#NULL!	#NULL!	513	518	1	1	1	8	8	8	8	8	8	8	8	8	8	8	8	8
B923932104	B9239321	2011	2	1	1	B923	1	2	34	3	3	1	#NULL!	9414.42	9752.26	#NULL!	#NULL!	#NULL!	5926.34	7909.86	#NULL!	#NULL!	#NULL!	#NULL!	#NULL!	#NULL!	#NULL!	#NULL!	#NULL!	#NULL!	#NULL!	513	518	1	8	8	8	8	8	8	8	8	8	8	8	8	8	8	8
B923935702	B9239357	2011	2	1	1	B923	1	37	#NULL!	3	3	4	5	9414.42	18078.1	14292.9	#NULL!	#NULL!	20790.1	15958.8	#NULL!	#NULL!	18537.9	#NULL!	#NULL!	#NULL!	#NULL!	#NULL!	#NULL!	#NULL!	#NULL!	513	518	1	2	8	8	8	8	2	8	1	8	1	1	1	2	1	1
B923935901	B9239359	2011	2	1	1	B923	1	71	#NULL!	1	1	1	7	9414.42	4362.63	72012.2	#NULL!	#NULL!	4738.01	4185.07	#NULL!	#NULL!	76148	#NULL!	#NULL!	#NULL!	#NULL!	#NULL!	#NULL!	#NULL!	#NULL!	513	518	1	2	8	1	2	2	2	8	2	3	2	8	2	8	8	8
B923935902	B9239359	2011	2	1	1	B923	2	67	#NULL!	1	1	1	3	9414.42	3486.32	#NULL!	#NULL!	#NULL!	4731.68	4066.73	#NULL!	#NULL!	#NULL!	#NULL!	#NULL!	#NULL!	#NULL!	#NULL!	#NULL!	#NULL!	#NULL!	513	518	1	2	8	1	1	2	2	8	3	3	1	1	2	8	8	8
B923936302	B9239363	2011	2	1	1	B923	2	36	#NULL!	1	2	4	7	9414.42	17752.2	45258.4	#NULL!	#NULL!	9582.32	19443	#NULL!	#NULL!	44690.1	#NULL!	#NULL!	#NULL!	#NULL!	#NULL!	#NULL!	#NULL!	#NULL!	513	518	1	2	8	8	8	8	2	8	1	8	1	1	2	8	8	8
B923936601	B9239366	2011	2	1	1	B923	1	43	#NULL!	3	4	3	3	9414.42	18317.9	29542.2	13558.1	#NULL!	13019.7	20757.5	20191.4	17733.5	49287.2	24868	#NULL!	#NULL!	#NULL!	#NULL!	#NULL!	#NULL!	#NULL!	513	518	1	2	8	1	2	1	2	8	1	8	2	8	2	8	8	8
B923937101	B9239371	2011	2	1	1	B923	1	34	#NULL!	2	3	4	5	9414.42	16580	35331.2	#NULL!	#NULL!	18278.2	19145.2	#NULL!	#NULL!	45762	#NULL!	#NULL!	#NULL!	#NULL!	#NULL!	#NULL!	#NULL!	#NULL!	513	518	1	2	8	8	8	8	2	8	1	8	2	8	1	2	1	1
B923937102	B9239371	2011	2	1	1	B923	2	32	#NULL!	2	3	4	7	9414.42	16683.3	#NULL!	#NULL!	#NULL!	16767.1	10126.4	#NULL!	#NULL!	#NULL!	#NULL!	#NULL!	#NULL!	#NULL!	#NULL!	#NULL!	#NULL!	#NULL!	513	518	1	2	8	8	8	8	2	8	1	8	1	1	1	1	1	1
B923937103	B9239371	2011	2	1	1	B923	1	2	26	3	3	1	#NULL!	9414.42	4876.13	#NULL!	#NULL!	#NULL!	2963.17	5932.39	#NULL!	#NULL!	#NULL!	#NULL!	#NULL!	#NULL!	#NULL!	#NULL!	#NULL!	#NULL!	#NULL!	513	518	1	8	8	8	8	8	8	8	8	8	8	8	8	8	8	8
B923937401	B9239374	2011	2	1	1	B923	2	74	#NULL!	2	1	1	7	9414.42	4098.46	#NULL!	#NULL!	#NULL!	4805.86	4054.17	#NULL!	#NULL!	#NULL!	#NULL!	#NULL!	#NULL!	#NULL!	#NULL!	#NULL!	#NULL!	#NULL!	513	518	1	2	8	2	8	8	2	8	1	8	2	8	1	2	2	1
B923937901	B9239379	2011	2	1	1	B923	1	57	#NULL!	1	2	2	5	9414.42	8519.38	#NULL!	8507.1	#NULL!	12167.4	7832.82	#NULL!	9835.24	#NULL!	#NULL!	#NULL!	#NULL!	#NULL!	#NULL!	#NULL!	#NULL!	#NULL!	513	518	1	2	8	2	8	8	2	8	1	8	2	8	2	8	8	8
B923937902	B9239379	2011	2	1	1	B923	2	49	#NULL!	1	2	2	5	9414.42	9673.58	20143.2	9696.47	#NULL!	10014	8291.89	37360.2	10203.2	19625.4	39121.1	#NULL!	#NULL!	#NULL!	#NULL!	#NULL!	#NULL!	#NULL!	513	518	1	2	8	2	8	8	2	8	1	8	2	8	2	8	8	8
B923937903	B9239379	2011	2	1	1	B923	1	25	#NULL!	1	2	3	2	9414.42	13365.9	19112.7	#NULL!	#NULL!	15923.2	22424	#NULL!	#NULL!	22377.7	#NULL!	#NULL!	#NULL!	#NULL!	#NULL!	#NULL!	#NULL!	#NULL!	513	518	1	2	8	8	8	8	2	8	1	8	2	8	2	8	8	8
B923938002	B9239380	2011	2	1	1	B923	2	67	#NULL!	4	3	1	6	9414.42	13945.3	35080.9	14719.1	#NULL!	4731.68	19099.2	44704.1	16667.3	37645.8	47356.4	#NULL!	#NULL!	#NULL!	#NULL!	#NULL!	#NULL!	#NULL!	513	518	1	2	8	2	8	8	2	8	1	8	2	8	2	8	8	8
B923938302	B9239383	2011	2	1	1	B923	2	56	#NULL!	2	2	4	7	9414.42	8600.4	30595.2	17634.2	#NULL!	7872.14	7762.84	43311.8	17756.5	30238	43375.7	#NULL!	#NULL!	#NULL!	#NULL!	#NULL!	#NULL!	#NULL!	513	518	1	2	8	2	8	8	2	8	1	8	1	1	2	8	8	8
B923938303	B9239383	2011	2	1	1	B923	2	81	#NULL!	3	2	#NULL!	#NULL!	9414.42	10306.9	#NULL!	#NULL!	#NULL!	8342.58	6081.26	#NULL!	#NULL!	#NULL!	#NULL!	#NULL!	#NULL!	#NULL!	#NULL!	#NULL!	#NULL!	#NULL!	513	518	1	2	8	2	8	8	2	8	1	8	2	8	2	8	8	8
B924931002	B9249310	2011	2	1	2	B924	2	49	#NULL!	3	4	2	7	2651.47	7374.48	#NULL!	7391.93	#NULL!	#NULL!	#NULL!	#NULL!	#NULL!	#NULL!	#NULL!	#NULL!	#NULL!	#NULL!	#NULL!	#NULL!	#NULL!	#NULL!	502	502	1	2	8	2	8	8	2	8	1	8	2	8	2	8	8	8
B924931501	B9249315	2011	2	1	2	B924	1	40	#NULL!	2	2	4	5	2651.47	4323.69	11260.5	5167.9	#NULL!	4962.65	6470.21	7696.27	6759.42	12524.4	9478.84	#NULL!	#NULL!	#NULL!	#NULL!	#NULL!	#NULL!	#NULL!	502	502	1	1	2	1	2	2	2	8	2	3	2	8	1	1	2	2
B924931502	B9249315	2011	2	1	2	B924	2	36	#NULL!	2	2	4	2	2651.47	2262.16	#NULL!	#NULL!	#NULL!	2434.97	2930.74	#NULL!	#NULL!	#NULL!	#NULL!	#NULL!	#NULL!	#NULL!	#NULL!	#NULL!	#NULL!	#NULL!	502	502	1	2	8	8	8	8	2	8	1	8	2	8	2	8	8	8
B924931503	B9249315	2011	2	1	2	B924	2	9	#NULL!	2	2	1	#NULL!	2651.47	2968.43	#NULL!	#NULL!	#NULL!	2555.74	2549.1	#NULL!	#NULL!	#NULL!	#NULL!	#NULL!	#NULL!	#NULL!	#NULL!	#NULL!	#NULL!	#NULL!	502	502	1	1	9	8	8	8	8	8	8	8	8	8	1	1	2	1
B924931504	B9249315	2011	2	1	2	B924	2	4	58	2	2	1	#NULL!	2651.47	2327.29	#NULL!	#NULL!	#NULL!	1693.8	2293.14	#NULL!	#NULL!	#NULL!	#NULL!	#NULL!	#NULL!	#NULL!	#NULL!	#NULL!	#NULL!	#NULL!	502	502	1	2	8	8	8	8	8	8	8	8	8	8	8	8	8	8
B924931505	B9249315	2011	2	1	2	B924	2	2	31	2	2	1	#NULL!	2651.47	2327.29	#NULL!	#NULL!	#NULL!	1693.8	2293.14	#NULL!	#NULL!	#NULL!	#NULL!	#NULL!	#NULL!	#NULL!	#NULL!	#NULL!	#NULL!	#NULL!	502	502	1	8	8	8	8	8	8	8	8	8	8	8	8	8	8	8
B924931701	B9249317	2011	2	1	2	B924	1	39	#NULL!	3	3	3	5	2651.47	7518.87	#NULL!	#NULL!	#NULL!	11065.4	6082.97	#NULL!	#NULL!	#NULL!	#NULL!	#NULL!	#NULL!	#NULL!	#NULL!	#NULL!	#NULL!	#NULL!	502	502	1	2	8	8	8	8	2	8	1	8	2	8	1	2	2	1
B924931702	B9249317	2011	2	1	2	B924	2	34	#NULL!	3	3	3	2	2651.47	6359.12	#NULL!	#NULL!	#NULL!	6391.07	3859.83	#NULL!	#NULL!	#NULL!	#NULL!	#NULL!	#NULL!	#NULL!	#NULL!	#NULL!	#NULL!	#NULL!	502	502	1	2	8	8	8	8	2	8	1	8	2	8	2	8	8	8
B924931703	B9249317	2011	2	1	2	B924	2	3	46	4	3	1	#NULL!	2651.47	2327.29	#NULL!	#NULL!	#NULL!	1693.8	2293.14	#NULL!	#NULL!	#NULL!	#NULL!	#NULL!	#NULL!	#NULL!	#NULL!	#NULL!	#NULL!	#NULL!	502	502	1	8	8	8	8	8	8	8	8	8	8	8	8	8	8	8
B924931704	B9249317	2011	2	1	2	B924	2	2	24	4	3	1	#NULL!	2651.47	2327.29	#NULL!	#NULL!	#NULL!	1693.8	2293.14	#NULL!	#NULL!	#NULL!	#NULL!	#NULL!	#NULL!	#NULL!	#NULL!	#NULL!	#NULL!	#NULL!	502	502	1	8	8	8	8	8	8	8	8	8	8	8	8	8	8	8
B924932101	B9249321	2011	2	1	2	B924	1	36	#NULL!	2	2	#NULL!	#NULL!	2651.47	7518.87	#NULL!	#NULL!	#NULL!	11065.4	6082.97	#NULL!	#NULL!	#NULL!	#NULL!	#NULL!	#NULL!	#NULL!	#NULL!	#NULL!	#NULL!	#NULL!	502	502	1	2	8	8	8	8	2	8	1	8	2	8	2	8	8	8
B924932102	B9249321	2011	2	1	2	B924	2	35	#NULL!	2	2	3	7	2651.47	2262.16	#NULL!	#NULL!	#NULL!	2434.97	2930.74	#NULL!	#NULL!	#NULL!	#NULL!	#NULL!	#NULL!	#NULL!	#NULL!	#NULL!	#NULL!	#NULL!	502	502	1	2	8	8	8	8	2	8	1	8	2	8	2	8	8	8
B924932103	B9249321	2011	2	1	2	B924	2	7	#NULL!	2	2	1	#NULL!	2651.47	2968.43	#NULL!	#NULL!	#NULL!	2555.74	2549.1	#NULL!	#NULL!	#NULL!	#NULL!	#NULL!	#NULL!	#NULL!	#NULL!	#NULL!	#NULL!	#NULL!	502	502	1	2	8	8	8	8	8	8	8	8	8	8	2	8	8	8
B924932104	B9249321	2011	2	1	2	B924	1	4	48	2	2	1	#NULL!	2651.47	1858.62	#NULL!	#NULL!	#NULL!	1129.46	2261.23	#NULL!	#NULL!	#NULL!	#NULL!	#NULL!	#NULL!	#NULL!	#NULL!	#NULL!	#NULL!	#NULL!	502	502	1	2	8	8	8	8	8	8	8	8	8	8	8	8	8	8
B924932501	B9249325	2011	2	1	2	B924	2	40	#NULL!	2	2	4	1	2651.47	2800.91	8548.76	6189.78	#NULL!	2238.41	3247.4	12072.3	5957.54	7609.55	12289.7	#NULL!	#NULL!	#NULL!	#NULL!	#NULL!	#NULL!	#NULL!	502	502	1	2	8	2	8	8	2	8	1	8	2	8	2	8	8	8
B924932502	B9249325	2011	2	1	2	B924	1	69	#NULL!	3	2	1	7	2651.47	1912.27	#NULL!	#NULL!	#NULL!	1998.68	1748.92	#NULL!	#NULL!	#NULL!	#NULL!	#NULL!	#NULL!	#NULL!	#NULL!	#NULL!	#NULL!	#NULL!	502	502	1	2	8	2	8	8	2	8	1	8	2	8	2	8	8	8
B924932503	B9249325	2011	2	1	2	B924	2	64	#NULL!	2	2	1	7	2651.47	1951.54	4705.27	2819.02	#NULL!	2317.3	1685.12	6675.64	2946.35	4793.15	6956.92	#NULL!	#NULL!	#NULL!	#NULL!	#NULL!	#NULL!	#NULL!	502	502	1	2	8	2	8	8	2	8	1	8	2	8	2	8	8	8
B924932901	B9249329	2011	2	1	2	B924	1	37	#NULL!	2	2	3	5	2651.47	7518.87	#NULL!	#NULL!	#NULL!	11065.4	6082.97	#NULL!	#NULL!	#NULL!	#NULL!	#NULL!	#NULL!	#NULL!	#NULL!	#NULL!	#NULL!	#NULL!	502	502	1	2	8	8	8	8	2	8	1	8	1	1	2	8	8	8
B924932902	B9249329	2011	2	1	2	B924	2	34	#NULL!	2	2	3	6	2651.47	6359.12	10839.3	#NULL!	#NULL!	6391.07	3859.83	#NULL!	#NULL!	8520.43	#NULL!	#NULL!	#NULL!	#NULL!	#NULL!	#NULL!	#NULL!	#NULL!	502	502	1	2	8	8	8	8	2	8	1	8	2	8	2	8	8	8
B924932903	B9249329	2011	2	1	2	B924	2	10	#NULL!	2	2	1	#NULL!	2651.47	2799.92	9277.47	#NULL!	#NULL!	2248.05	3315.89	#NULL!	#NULL!	5430.64	#NULL!	#NULL!	#NULL!	#NULL!	#NULL!	#NULL!	#NULL!	#NULL!	502	502	1	2	8	8	8	8	8	8	8	8	8	8	2	8	8	8
B924932904	B9249329	2011	2	1	2	B924	2	5	70	2	2	1	#NULL!	2651.47	2968.43	#NULL!	#NULL!	#NULL!	2555.74	2549.1	#NULL!	#NULL!	#NULL!	#NULL!	#NULL!	#NULL!	#NULL!	#NULL!	#NULL!	#NULL!	#NULL!	502	502	1	2	8	8	8	8	8	8	8	8	8	8	8	8	8	8
B924933603	B9249336	2011	2	1	2	B924	2	25	#NULL!	2	2	4	1	2651.47	7307.06	#NULL!	#NULL!	#NULL!	6738.91	9194.16	#NULL!	#NULL!	#NULL!	#NULL!	#NULL!	#NULL!	#NULL!	#NULL!	#NULL!	#NULL!	#NULL!	502	502	1	2	8	8	8	8	2	8	1	8	1	1	2	8	8	8
B924933604	B9249336	2011	2	1	2	B924	1	24	#NULL!	2	2	3	7	2651.47	10680.7	19960.6	#NULL!	#NULL!	10755.1	17839.5	#NULL!	#NULL!	23461.4	#NULL!	#NULL!	#NULL!	#NULL!	#NULL!	#NULL!	#NULL!	#NULL!	502	502	1	2	8	8	8	8	2	8	1	8	2	8	2	8	8	8
B924934201	B9249342	2011	2	1	2	B924	2	35	#NULL!	3	3	3	3	2651.47	2262.16	#NULL!	#NULL!	#NULL!	2434.97	2930.74	#NULL!	#NULL!	#NULL!	#NULL!	#NULL!	#NULL!	#NULL!	#NULL!	#NULL!	#NULL!	#NULL!	502	502	1	2	8	8	8	8	2	8	1	8	2	8	1	1	2	2
B924934202	B9249342	2011	2	1	2	B924	2	37	#NULL!	3	3	3	7	2651.47	2262.16	#NULL!	#NULL!	#NULL!	2434.97	2930.74	#NULL!	#NULL!	#NULL!	#NULL!	#NULL!	#NULL!	#NULL!	#NULL!	#NULL!	#NULL!	#NULL!	502	502	1	2	8	8	8	8	2	8	1	8	1	2	1	1	2	2
B924934203	B9249342	2011	2	1	2	B924	1	16	#NULL!	2	3	1	7	2651.47	7064.18	5955.71	#NULL!	#NULL!	10405.6	5582.42	#NULL!	#NULL!	16815.8	#NULL!	#NULL!	#NULL!	#NULL!	#NULL!	#NULL!	#NULL!	#NULL!	502	502	1	2	8	8	8	8	8	8	1	8	2	8	2	8	8	8
B924934505	B9249345	2011	2	1	2	B924	2	71	#NULL!	4	3	1	7	2651.47	4686.58	#NULL!	10199.1	#NULL!	#NULL!	#NULL!	#NULL!	#NULL!	#NULL!	#NULL!	#NULL!	#NULL!	#NULL!	#NULL!	#NULL!	#NULL!	#NULL!	502	502	1	2	8	2	8	8	2	8	1	8	2	8	2	8	8	8
B924935301	B9249353	2011	2	1	2	B924	1	53	#NULL!	2	3	3	7	2651.47	6148.41	#NULL!	4252.9	#NULL!	#NULL!	#NULL!	#NULL!	#NULL!	#NULL!	#NULL!	#NULL!	#NULL!	#NULL!	#NULL!	#NULL!	#NULL!	#NULL!	502	502	1	2	8	2	8	8	2	8	1	8	2	8	2	8	8	8
B924935302	B9249353	2011	2	1	2	B924	2	49	#NULL!	2	3	3	7	2651.47	3687.24	#NULL!	3695.97	#NULL!	#NULL!	#NULL!	#NULL!	#NULL!	#NULL!	#NULL!	#NULL!	#NULL!	#NULL!	#NULL!	#NULL!	#NULL!	#NULL!	502	502	1	2	8	2	8	8	2	8	1	8	2	8	1	1	1	1
B924935303	B9249353	2011	2	1	2	B924	1	25	#NULL!	2	3	4	2	2651.47	5094.64	14570.2	#NULL!	#NULL!	#NULL!	#NULL!	#NULL!	#NULL!	#NULL!	#NULL!	#NULL!	#NULL!	#NULL!	#NULL!	#NULL!	#NULL!	#NULL!	502	502	1	2	8	8	8	8	2	8	1	8	2	8	2	8	8	8
B924935701	B9249357	2011	2	1	2	B924	1	35	#NULL!	2	3	3	3	2651.47	7518.87	13619.9	#NULL!	#NULL!	#NULL!	#NULL!	#NULL!	#NULL!	#NULL!	#NULL!	#NULL!	#NULL!	#NULL!	#NULL!	#NULL!	#NULL!	#NULL!	502	502	1	2	8	8	8	8	2	8	1	8	2	8	2	8	8	8
[truncated: 6,154 more rows]
[truncated: 83 more columns]
