# Supplementary material for: The Effects of Earphone Use and Environmental Lead Exposure on Hearing Loss in the Korean Population: Data Analysis of the Korea National Health and Nutrition Examination Survey (KNHANES), 2010–2013
Source: PLoS One. 2016 Dec 28;11(12):e0168718. doi: 10.1371/journal.pone.0168718 (PMC5193416; doi:10.1371/journal.pone.0168718)
Supplement: S6 File — This data contains the information about audiometric measurement. (XLSX) [file pone.0168718.s007.xlsx]

## Sheet: HN12_ENT
mod_d	ID	ID_fam	year	region	town_t	apt_t	psu	sex	age	age_month	incm	ho_incm	edu	occp	wt_hs	wt_itvex	wt_pft	wt_hm	wt_ntr	wt_tot	wt_pfhm	wt_pfnt	wt_hmnt	wt_pfhmnt	kstrata	T_ex	T_Q_SNSTDG	T_Q_SNSTPT	T_Q_ARDG	T_Q_ARPT	T_Q_OMDG	T_Q_OMPT	T_Q_DZ	T_Q_DZ1	T_Q_DZ2	T_Q_VC	T_Q_VC1	T_Q_HR	T_Q_HR1	T_Q_VN	T_Q_VN1	T_Q_CR	T_Q_CR1	T_Q_CR2	T_Q_CR3	T_Q_CR4	T_Q_SNST1	T_Q_SNST2	T_Q_SNST3
2015.01.07	A851913501	A8519135	2012	1	1	1	A851	1	72	#NULL!	2	2	2	7	5573.66	2821.86	8534.02	#NULL!	#NULL!	#NULL!	#NULL!	#NULL!	#NULL!	#NULL!	512	1	2	8	2	8	2	8	2	8	8	2	8	1	8	2	8	2	8	8	8	8	1	1	1
2015.01.07	A851913502	A8519135	2012	1	1	1	A851	2	63	#NULL!	2	2	2	7	5573.66	4215.91	#NULL!	#NULL!	#NULL!	#NULL!	#NULL!	#NULL!	#NULL!	#NULL!	512	1	2	8	2	8	2	8	2	8	8	2	8	1	8	2	8	2	8	8	8	8	1	1	1
2015.01.07	A851915601	A8519156	2012	1	1	1	A851	2	81	#NULL!	2	1	1	7	5573.66	3881.28	4859.9	#NULL!	4044.5	4166.55	#NULL!	5342.51	#NULL!	#NULL!	512	1	2	8	2	8	2	8	2	8	8	2	8	1	8	2	8	2	8	8	8	8	1	1	1
2015.01.07	A851917101	A8519171	2012	1	1	1	A851	1	62	#NULL!	2	2	1	7	5573.66	8593.69	9513.74	9121.84	#NULL!	#NULL!	15605.5	#NULL!	#NULL!	#NULL!	512	1	2	8	2	8	2	8	2	8	8	2	8	1	8	2	8	2	8	8	8	8	1	1	1
2015.01.07	A851917102	A8519171	2012	1	1	1	A851	2	56	#NULL!	2	2	1	7	5573.66	6199.53	#NULL!	14130.3	#NULL!	#NULL!	#NULL!	#NULL!	#NULL!	#NULL!	512	1	2	8	2	8	2	8	1	2	2	2	8	1	8	2	8	2	8	8	8	8	1	1	1
2015.01.07	A851917701	A8519177	2012	1	1	1	A851	1	55	#NULL!	4	4	1	3	5573.66	7671.08	6937.36	#NULL!	9122.08	8802.56	#NULL!	8364.4	#NULL!	#NULL!	512	1	1	2	1	2	1	2	2	8	8	1	2	4	1	1	3	1	1	2	1	1	1	1	1
2015.01.07	A851917702	A8519177	2012	1	1	1	A851	2	50	#NULL!	4	4	2	2	5573.66	4587.02	6013.21	#NULL!	5461.86	6679.37	#NULL!	7101.81	#NULL!	#NULL!	512	1	2	8	2	8	2	8	2	8	8	2	8	2	3	1	1	2	8	8	8	8	1	1	1
2015.01.07	A851917703	A8519177	2012	1	1	1	A851	2	22	#NULL!	4	4	4	2	5573.66	5997.88	#NULL!	37967.5	7150.37	11510	#NULL!	#NULL!	26985.1	#NULL!	512	1	1	2	2	8	2	8	8	8	8	2	8	1	8	2	8	1	1	1	1	1	1	1	1
2015.01.07	A851917704	A8519177	2012	1	1	1	A851	2	21	#NULL!	4	4	3	1	5573.66	5997.88	#NULL!	#NULL!	7150.37	11510	#NULL!	#NULL!	#NULL!	#NULL!	512	1	2	8	2	8	2	8	8	8	8	2	8	1	8	2	8	1	2	2	2	1	1	2	1
2015.01.07	A851917705	A8519177	2012	1	1	1	A851	1	18	#NULL!	4	4	2	6	5573.66	7556.47	#NULL!	11507.4	9544.49	14101.6	#NULL!	#NULL!	32824.1	#NULL!	512	1	2	8	2	8	2	8	8	8	8	8	8	1	8	2	8	2	8	8	8	8	1	1	1
2015.01.07	A851918602	A8519186	2012	1	1	1	A851	2	41	#NULL!	2	3	3	7	5573.66	9028.63	7357.8	#NULL!	5463.39	10828.1	#NULL!	7820.92	#NULL!	#NULL!	512	1	2	8	2	8	2	8	1	1	2	1	1	1	8	2	8	1	2	1	1	2	1	1	1
2015.01.07	A851918603	A8519186	2012	1	1	1	A851	2	8	#NULL!	2	3	1	#NULL!	5573.66	4751.44	#NULL!	#NULL!	6055.9	10554.6	#NULL!	#NULL!	#NULL!	#NULL!	512	1	2	8	1	2	2	8	8	8	8	8	8	8	8	8	8	1	1	2	1	1	1	1	1
2015.01.07	A851918604	A8519186	2012	1	1	1	A851	1	4	56	3	3	1	#NULL!	5573.66	3299.34	#NULL!	#NULL!	4521.59	7840.64	#NULL!	#NULL!	#NULL!	#NULL!	512	1	2	8	2	8	2	8	8	8	8	8	8	8	8	8	8	8	8	8	8	8	8	8	8
2015.01.07	A851919801	A8519198	2012	1	1	1	A851	1	40	#NULL!	1	2	3	5	5573.66	9154.16	14114.2	26516.5	12754.5	22263.8	18760	22821.8	31329.7	31492.9	512	1	2	8	1	2	1	2	2	8	8	2	8	1	8	2	8	1	1	2	2	1	1	1	1
2015.01.07	A851919802	A8519198	2012	1	1	1	A851	2	37	#NULL!	1	2	3	5	5573.66	4789.67	#NULL!	#NULL!	5842.58	8232.84	#NULL!	#NULL!	#NULL!	#NULL!	512	1	2	8	2	8	2	8	8	8	8	2	8	1	8	2	8	2	8	8	8	8	1	1	1
2015.01.07	A851919803	A8519198	2012	1	1	1	A851	1	11	#NULL!	1	2	1	#NULL!	5573.66	3344.7	#NULL!	9253.09	4539.14	7909.97	#NULL!	#NULL!	11421.8	#NULL!	512	1	2	8	2	8	2	8	8	8	8	8	8	8	8	8	8	2	8	8	8	8	1	1	1
2015.01.07	A851919804	A8519198	2012	1	1	1	A851	2	9	#NULL!	1	2	1	#NULL!	5573.66	4751.44	#NULL!	#NULL!	6055.9	7915.98	#NULL!	#NULL!	#NULL!	#NULL!	512	1	2	8	2	8	2	8	8	8	8	8	8	8	8	8	8	2	8	8	8	8	1	1	1
2015.01.07	A851920702	A8519207	2012	1	1	1	A851	2	34	#NULL!	4	4	4	7	5573.66	13752.7	#NULL!	47040.6	#NULL!	#NULL!	#NULL!	#NULL!	#NULL!	#NULL!	512	1	2	8	2	8	2	8	8	8	8	2	8	1	8	2	8	2	8	8	8	8	1	1	1
2015.01.07	A851920703	A8519207	2012	1	1	1	A851	2	7	#NULL!	4	4	1	#NULL!	5573.66	4751.44	#NULL!	#NULL!	#NULL!	#NULL!	#NULL!	#NULL!	#NULL!	#NULL!	512	1	1	2	2	8	2	8	8	8	8	8	8	8	8	8	8	1	1	1	1	1	1	1	1
2015.01.07	A851920704	A8519207	2012	1	1	1	A851	1	5	64	4	4	1	#NULL!	5573.66	3183.21	#NULL!	#NULL!	#NULL!	#NULL!	#NULL!	#NULL!	#NULL!	#NULL!	512	1	1	2	2	8	1	2	8	8	8	8	8	8	8	8	8	8	8	8	8	8	8	8	8
2015.01.07	A851920706	A8519207	2012	1	1	1	A851	2	61	#NULL!	4	4	3	7	5573.66	8431.82	7647.16	#NULL!	18919.7	20139.2	#NULL!	8674.57	#NULL!	#NULL!	512	1	2	8	2	8	2	8	2	8	8	2	8	1	8	2	8	2	8	8	8	8	1	1	1
2015.01.07	A851921604	A8519216	2012	1	1	1	A851	1	12	#NULL!	3	4	1	#NULL!	5573.66	3344.7	#NULL!	#NULL!	#NULL!	#NULL!	#NULL!	#NULL!	#NULL!	#NULL!	512	1	2	8	2	8	2	8	8	8	8	8	8	1	8	1	1	1	1	2	2	1	1	1	1
2015.01.07	A851925202	A8519252	2012	1	1	1	A851	2	43	#NULL!	#NULL!	#NULL!	4	7	5573.66	9028.63	14715.6	22877.6	10926.8	12181.7	30911.2	15641.8	34589.8	33093.9	512	1	2	8	1	2	2	8	2	8	8	2	8	1	8	2	8	2	8	8	8	8	1	1	1
2015.01.07	A851925203	A8519252	2012	1	1	1	A851	2	10	#NULL!	#NULL!	#NULL!	1	#NULL!	5573.66	3621.89	#NULL!	#NULL!	4109.09	10568.6	#NULL!	#NULL!	#NULL!	#NULL!	512	1	2	8	2	8	2	8	8	8	8	8	8	8	8	8	8	1	2	2	2	1	1	1	1
2015.01.07	A851926101	A8519261	2012	1	1	1	A851	2	51	#NULL!	1	1	2	7	5573.66	4587.02	6013.21	19165.4	5461.86	6679.37	12681.9	7101.81	22486.8	15601.7	512	1	2	8	2	8	2	8	2	8	8	1	2	1	8	1	1	1	1	1	1	2	2	1	1
2015.01.07	A851926102	A8519261	2012	1	1	1	A851	1	29	#NULL!	1	1	3	1	5573.66	9802.86	#NULL!	#NULL!	15303.5	24959.8	#NULL!	#NULL!	#NULL!	#NULL!	512	1	2	8	2	8	2	8	8	8	8	2	8	1	8	2	8	1	2	2	1	1	2	2	1
2015.01.07	A851927001	A8519270	2012	1	1	1	A851	1	41	#NULL!	#NULL!	#NULL!	3	3	5573.66	9154.16	14114.2	#NULL!	12754.5	22263.8	#NULL!	22821.8	#NULL!	#NULL!	512	1	2	8	2	8	2	8	1	1	2	1	1	1	8	1	2	2	8	8	8	8	1	1	1
2015.01.07	A851928501	A8519285	2012	1	1	1	A851	1	56	#NULL!	1	1	1	7	5573.66	7671.08	6937.36	7921.88	9122.08	8802.56	9272.08	8364.4	8892.7	10515.6	512	1	2	8	2	8	2	8	1	3	2	1	1	2	3	1	2	1	1	1	1	2	1	1	1
2015.01.07	A851929101	A8519291	2012	1	1	1	A851	1	34	#NULL!	3	4	4	1	5573.66	13875	#NULL!	33565.3	17099.4	24710	#NULL!	#NULL!	46040	#NULL!	512	1	2	8	2	8	2	8	8	8	8	2	8	1	8	2	8	2	8	8	8	8	1	1	1
2015.01.07	A851929102	A8519291	2012	1	1	1	A851	2	34	#NULL!	4	4	4	7	5573.66	6876.36	#NULL!	#NULL!	7804.55	9565.34	#NULL!	#NULL!	#NULL!	#NULL!	512	1	2	8	2	8	2	8	8	8	8	2	8	1	8	2	8	2	8	8	8	8	1	1	1
2015.01.07	A851929103	A8519291	2012	1	1	1	A851	1	1	13	4	4	1	#NULL!	5573.66	3299.34	#NULL!	#NULL!	3391.19	5880.48	#NULL!	#NULL!	#NULL!	#NULL!	512	1	8	8	8	8	8	8	8	8	8	8	8	8	8	8	8	8	8	8	8	8	8	8	8
2015.01.07	A851929702	A8519297	2012	1	1	1	A851	2	64	#NULL!	2	2	1	7	5573.66	8431.82	7647.16	#NULL!	9550.18	8456.44	#NULL!	8674.57	#NULL!	#NULL!	512	1	2	8	2	8	2	8	2	8	8	1	2	1	8	2	8	1	2	1	1	2	1	1	1
2015.01.07	A851930901	A8519309	2012	1	1	1	A851	1	73	#NULL!	1	1	1	7	5573.66	2821.86	4267.01	#NULL!	3405.49	3857.06	#NULL!	4944.51	#NULL!	#NULL!	512	1	2	8	2	8	2	8	2	8	8	2	8	1	8	2	8	1	1	1	1	2	1	1	1
2015.01.07	A851930902	A8519309	2012	1	1	1	A851	2	62	#NULL!	1	1	1	6	5573.66	4215.91	3823.58	14913.3	4775.09	4228.22	18832.4	4337.29	17217.1	21957.9	512	1	2	8	2	8	2	8	1	2	2	2	8	3	3	1	3	1	1	1	1	2	1	1	1
2015.01.07	A851932101	A8519321	2012	1	1	1	A851	1	41	#NULL!	1	2	3	2	5573.66	9154.16	14114.2	#NULL!	12754.5	22263.8	#NULL!	22821.8	#NULL!	#NULL!	512	1	2	8	2	8	2	8	1	2	2	2	8	1	8	2	8	2	8	8	8	8	1	1	1
2015.01.07	A851932102	A8519321	2012	1	1	1	A851	2	44	#NULL!	2	2	4	1	5573.66	4514.32	7357.8	#NULL!	5463.39	8121.11	#NULL!	7820.92	#NULL!	#NULL!	512	1	2	8	2	8	2	8	2	8	8	2	8	1	8	2	8	2	8	8	8	8	1	1	1
2015.01.07	A851932103	A8519321	2012	1	1	1	A851	2	14	#NULL!	2	2	1	#NULL!	5573.66	3621.89	#NULL!	16949.4	4741.26	7045.74	#NULL!	#NULL!	27104.4	#NULL!	512	1	2	8	1	2	2	8	8	8	8	8	8	1	8	2	8	1	2	2	2	1	2	2	1
2015.01.07	A851932104	A8519321	2012	1	1	1	A851	1	12	#NULL!	2	2	1	#NULL!	5573.66	3344.7	#NULL!	#NULL!	5237.46	7909.97	#NULL!	#NULL!	#NULL!	#NULL!	512	1	2	8	1	2	2	8	8	8	8	8	8	1	8	1	1	1	2	1	1	2	1	1	1
2015.01.07	A852893701	A8528937	2012	1	1	1	A852	1	24	#NULL!	1	2	3	2	2580.03	9154.04	#NULL!	4852.68	12340.9	13995.8	#NULL!	#NULL!	7957.04	#NULL!	512	1	1	2	1	2	2	8	8	8	8	2	8	1	8	2	8	1	1	1	1	2	1	2	1
2015.01.07	A852895501	A8528955	2012	1	1	1	A852	1	48	#NULL!	1	2	3	5	2580.03	3825.86	5390.85	#NULL!	#NULL!	#NULL!	#NULL!	#NULL!	#NULL!	#NULL!	512	1	2	8	2	8	2	8	2	8	8	2	8	1	8	2	8	2	8	8	8	8	1	1	1
2015.01.07	A852895502	A8528955	2012	1	1	1	A852	2	47	#NULL!	1	2	4	3	2580.03	3368.22	4045.3	7786.55	#NULL!	#NULL!	12090.5	#NULL!	#NULL!	#NULL!	512	1	2	8	1	2	2	8	2	8	8	2	8	1	8	2	8	1	1	1	1	2	1	1	1
2015.01.07	A852895503	A8528955	2012	1	1	1	A852	1	19	#NULL!	2	2	3	7	2580.03	4372.33	#NULL!	9987.62	#NULL!	#NULL!	#NULL!	#NULL!	#NULL!	#NULL!	512	1	2	8	2	8	2	8	8	8	8	2	8	1	8	2	8	2	8	8	8	8	1	1	1
2015.01.07	A852895504	A8528955	2012	1	1	1	A852	2	17	#NULL!	2	2	2	7	2580.03	3742.9	#NULL!	#NULL!	#NULL!	#NULL!	#NULL!	#NULL!	#NULL!	#NULL!	512	1	2	8	2	8	2	8	8	8	8	8	8	1	8	2	8	2	8	8	8	8	1	1	1
2015.01.07	A852895505	A8528955	2012	1	1	1	A852	2	15	#NULL!	2	2	2	7	2580.03	3742.9	#NULL!	#NULL!	#NULL!	#NULL!	#NULL!	#NULL!	#NULL!	#NULL!	512	1	2	8	2	8	2	8	8	8	8	8	8	1	8	2	8	2	8	8	8	8	1	1	1
2015.01.07	A852895801	A8528958	2012	1	1	1	A852	1	41	#NULL!	3	3	3	3	2580.03	4237.43	9149.62	23014.5	#NULL!	#NULL!	28144.6	#NULL!	#NULL!	#NULL!	512	1	2	8	2	8	2	8	2	8	8	2	8	1	8	2	8	2	8	8	8	8	1	1	1
2015.01.07	A852895802	A8528958	2012	1	1	1	A852	2	40	#NULL!	3	3	3	2	2580.03	2089.66	4769.72	#NULL!	2963.65	4229.13	#NULL!	9777.76	#NULL!	#NULL!	512	1	2	8	1	2	2	8	1	3	2	2	8	1	8	2	8	1	2	1	1	2	1	1	1
2015.01.07	A852895803	A8528958	2012	1	1	1	A852	2	13	#NULL!	3	3	1	#NULL!	2580.03	2481.75	#NULL!	#NULL!	2571.93	3669.13	#NULL!	#NULL!	#NULL!	#NULL!	512	1	2	8	2	8	2	8	8	8	8	8	8	1	8	2	8	2	8	8	8	8	1	1	1
2015.01.07	A852895804	A8528958	2012	1	1	1	A852	1	11	#NULL!	3	3	1	#NULL!	2580.03	4583.63	#NULL!	#NULL!	4665.38	4119.18	#NULL!	#NULL!	#NULL!	#NULL!	512	1	2	8	1	2	2	8	8	8	8	8	8	8	8	8	8	1	1	2	2	2	1	2	1
2015.01.07	A852895805	A8528958	2012	1	1	1	A852	1	78	#NULL!	4	3	1	7	2580.03	1352.83	#NULL!	#NULL!	1807.53	2008.6	#NULL!	#NULL!	#NULL!	#NULL!	512	1	2	8	2	8	2	8	2	8	8	2	8	2	3	1	1	2	8	8	8	8	1	1	1
2015.01.07	A852895806	A8528958	2012	1	1	1	A852	2	66	#NULL!	4	3	1	7	2580.03	1249.15	2083.75	#NULL!	1863.16	1844.13	#NULL!	4448.96	#NULL!	#NULL!	512	1	2	8	2	8	2	8	2	8	8	2	8	3	2	1	1	1	1	2	1	2	1	1	1
2015.01.07	A852896401	A8528964	2012	1	1	1	A852	1	57	#NULL!	4	4	2	5	2580.03	3550.92	3372.88	13751.3	3958.67	3820.01	6955.2	5228.61	17641.7	10955.5	512	1	2	8	2	8	2	8	2	8	8	1	2	1	8	2	8	2	8	8	8	8	1	1	1
2015.01.07	A852896402	A8528964	2012	1	1	1	A852	2	55	#NULL!	4	4	3	5	2580.03	1913.16	2283.91	#NULL!	2342.13	2427.87	#NULL!	3433.01	#NULL!	#NULL!	512	1	2	8	2	8	2	8	2	8	8	2	8	1	8	2	8	1	1	1	1	2	1	1	1
2015.01.07	A852896403	A8528964	2012	1	1	1	A852	1	29	#NULL!	4	4	3	2	2580.03	4537.71	#NULL!	#NULL!	6641.19	10831.7	#NULL!	#NULL!	#NULL!	#NULL!	512	1	2	8	2	8	2	8	8	8	8	2	8	1	8	2	8	2	8	8	8	8	1	1	1
2015.01.07	A852896404	A8528964	2012	1	1	1	A852	2	28	#NULL!	3	4	4	2	2580.03	2990.6	#NULL!	#NULL!	3563.16	4783.55	#NULL!	#NULL!	#NULL!	#NULL!	512	1	2	8	2	8	2	8	8	8	8	2	8	1	8	2	8	2	8	8	8	8	1	1	1
2015.01.07	A852902101	A8529021	2012	1	1	1	A852	1	32	#NULL!	4	4	4	1	2580.03	6422.69	#NULL!	#NULL!	7420.56	10723.3	#NULL!	#NULL!	#NULL!	#NULL!	512	1	2	8	2	8	2	8	8	8	8	2	8	1	8	2	8	2	8	8	8	8	2	1	1
2015.01.07	A852905101	A8529051	2012	1	1	1	A852	1	25	#NULL!	2	2	3	7	2580.03	4537.71	#NULL!	#NULL!	6641.19	10831.7	#NULL!	#NULL!	#NULL!	#NULL!	512	1	2	8	2	8	2	8	8	8	8	2	8	1	8	2	8	2	8	8	8	8	1	1	1
2015.01.07	A852905102	A8529051	2012	1	1	1	A852	1	25	#NULL!	2	2	4	1	2580.03	4537.71	#NULL!	#NULL!	6641.19	10831.7	#NULL!	#NULL!	#NULL!	#NULL!	512	1	2	8	1	2	2	8	8	8	8	1	1	1	8	2	8	2	8	8	8	8	2	1	1
2015.01.07	A852908701	A8529087	2012	1	1	1	A852	2	53	#NULL!	2	3	3	7	2580.03	2123.31	2923.57	#NULL!	2370.26	2898.62	#NULL!	4439.36	#NULL!	#NULL!	512	1	2	8	2	8	2	8	2	8	8	2	8	1	8	2	8	2	8	8	8	8	1	1	1
2015.01.07	A852908702	A8529087	2012	1	1	1	A852	1	29	#NULL!	2	3	4	6	2580.03	4537.71	#NULL!	#NULL!	6641.19	10831.7	#NULL!	#NULL!	#NULL!	#NULL!	512	1	2	8	1	1	2	8	8	8	8	2	8	1	8	2	8	1	1	1	1	2	1	2	1
2015.01.07	A852908703	A8529087	2012	1	1	1	A852	2	31	#NULL!	2	3	4	2	2580.03	3183.04	#NULL!	15310.5	3386.9	4151.03	#NULL!	#NULL!	20156.4	#NULL!	512	1	2	8	1	2	2	8	8	8	8	2	8	1	8	2	8	1	2	2	1	1	1	1	1
2015.01.07	A852912001	A8529120	2012	1	1	1	A852	1	50	#NULL!	1	2	#NULL!	#NULL!	2580.03	4945.36	9796.03	#NULL!	#NULL!	#NULL!	#NULL!	#NULL!	#NULL!	#NULL!	512	1	2	8	2	8	2	8	2	8	8	2	8	1	8	2	8	1	1	1	1	2	1	1	1
2015.01.07	A852912002	A8529120	2012	1	1	1	A852	2	50	#NULL!	1	2	3	7	2580.03	2123.31	#NULL!	#NULL!	3160.35	3864.82	#NULL!	#NULL!	#NULL!	#NULL!	512	1	2	8	2	8	2	8	1	2	2	2	8	1	8	2	8	1	2	2	1	2	1	1	1
2015.01.07	A852912003	A8529120	2012	1	1	1	A852	1	24	#NULL!	1	2	3	7	2580.03	9154.04	#NULL!	#NULL!	16454.5	18661	#NULL!	#NULL!	#NULL!	#NULL!	512	1	2	8	2	8	2	8	8	8	8	2	8	1	8	2	8	1	1	1	1	2	1	1	1
2015.01.07	A852912004	A8529120	2012	1	1	1	A852	2	22	#NULL!	1	2	3	6	2580.03	2776.4	#NULL!	16476.6	4137.35	6659.9	#NULL!	#NULL!	21413.7	#NULL!	512	1	1	2	1	2	2	8	8	8	8	2	8	1	8	1	1	1	1	2	1	1	1	1	1
2015.01.07	A852913801	A8529138	2012	1	1	1	A852	1	30	#NULL!	2	3	4	1	2580.03	6422.69	#NULL!	7283.1	7420.56	10723.3	#NULL!	#NULL!	11417	#NULL!	512	1	2	8	2	8	2	8	8	8	8	2	8	2	3	1	1	2	8	8	8	8	1	2	1
2015.01.07	A852915301	A8529153	2012	1	1	1	A852	1	63	#NULL!	1	1	3	7	2580.03	2651.99	2312.75	#NULL!	#NULL!	#NULL!	#NULL!	#NULL!	#NULL!	#NULL!	512	1	2	8	2	8	2	8	2	8	8	2	8	1	8	2	8	2	8	8	8	8	1	1	1
2015.01.07	A852921901	A8529219	2012	1	1	1	A852	1	59	#NULL!	1	1	2	7	2580.03	3550.92	3372.88	#NULL!	3958.67	3820.01	#NULL!	5228.61	#NULL!	#NULL!	512	1	2	8	2	8	2	8	2	8	8	1	2	1	8	2	8	2	8	8	8	8	1	1	1
2015.01.07	A852921902	A8529219	2012	1	1	1	A852	2	60	#NULL!	1	1	1	7	2580.03	1951.53	1858.99	6471.86	2072.22	1834.9	7063.29	2711.25	8538.98	11438.3	512	1	2	8	1	2	2	8	1	2	2	2	8	1	8	1	1	1	2	1	1	2	1	1	1
2015.01.07	A852924901	A8529249	2012	1	1	1	A852	1	24	#NULL!	1	2	3	7	2580.03	9154.04	#NULL!	#NULL!	12340.9	13995.8	#NULL!	#NULL!	#NULL!	#NULL!	512	1	2	8	2	8	2	8	8	8	8	2	8	1	8	2	8	2	8	8	8	8	1	1	1
2015.01.07	A852927902	A8529279	2012	1	1	1	A852	2	69	#NULL!	3	3	1	6	2580.03	6245.73	6251.24	#NULL!	3726.31	9220.64	#NULL!	8897.91	#NULL!	#NULL!	512	1	2	8	1	2	2	8	2	8	8	1	2	2	3	1	2	2	8	8	8	8	1	1	1
2015.01.07	A852929101	A8529291	2012	1	1	1	A852	1	79	#NULL!	#NULL!	#NULL!	1	7	2580.03	2705.66	4149.16	26020.9	2892.05	3347.66	25450	6181.65	35289.2	40176.8	512	1	2	8	2	8	2	8	2	8	8	2	8	1	8	1	2	2	8	8	8	8	1	1	1
2015.01.07	A853909302	A8539093	2012	1	1	1	A853	2	37	#NULL!	2	3	4	7	7046.58	17616	#NULL!	#NULL!	10202.7	20620	#NULL!	#NULL!	#NULL!	#NULL!	512	1	2	8	2	8	2	8	8	8	8	2	8	1	8	2	8	1	1	1	1	2	1	1	1
2015.01.07	A853909901	A8539099	2012	1	1	1	A853	1	44	#NULL!	2	3	#NULL!	#NULL!	7046.58	11573.3	#NULL!	45796	#NULL!	#NULL!	#NULL!	#NULL!	#NULL!	#NULL!	512	1	2	8	2	8	2	8	2	8	8	2	8	1	8	2	8	2	8	8	8	8	1	1	1
2015.01.07	A853909902	A8539099	2012	1	1	1	A853	2	41	#NULL!	2	3	3	2	7046.58	5707.29	21847.9	#NULL!	12720.7	14181.6	#NULL!	22117.3	#NULL!	#NULL!	512	1	2	8	1	2	2	8	2	8	8	2	8	1	8	2	8	1	1	1	1	2	1	1	1
2015.01.07	A853909903	A8539099	2012	1	1	1	A853	2	9	#NULL!	2	3	1	#NULL!	7046.58	7659.03	#NULL!	#NULL!	7626.35	13823.4	#NULL!	#NULL!	#NULL!	#NULL!	512	1	2	8	2	8	2	8	8	8	8	8	8	8	8	8	8	2	8	8	8	8	1	1	1
2015.01.07	A853910201	A8539102	2012	1	1	1	A853	2	45	#NULL!	1	2	3	2	7046.58	9199.3	12353.1	#NULL!	9827.11	10912.4	#NULL!	13199.2	#NULL!	#NULL!	512	1	2	8	2	8	2	8	2	8	8	2	8	1	8	2	8	2	8	8	8	8	1	1	1
2015.01.07	A853910202	A8539102	2012	1	1	1	A853	2	20	#NULL!	1	2	3	2	7046.58	7582.91	#NULL!	49179.6	8324.3	13399.6	#NULL!	#NULL!	57997.8	#NULL!	512	1	2	8	1	1	2	8	8	8	8	2	8	1	8	1	1	1	1	2	2	1	1	1	1
2015.01.07	A853910203	A8539102	2012	1	1	1	A853	2	16	#NULL!	2	2	2	7	7046.58	11006.4	#NULL!	#NULL!	10460.8	16239	#NULL!	#NULL!	#NULL!	#NULL!	512	1	2	8	2	8	2	8	8	8	8	8	8	1	8	2	8	2	8	8	8	8	1	1	1
2015.01.07	A853910204	A8539102	2012	1	1	1	A853	1	13	#NULL!	1	2	1	#NULL!	7046.58	6739.31	#NULL!	37288.5	6097.34	9208.61	#NULL!	#NULL!	40913.7	#NULL!	512	1	2	8	2	8	2	8	8	8	8	8	8	1	8	2	8	2	8	8	8	8	1	1	1
2015.01.07	A853910205	A8539102	2012	1	1	1	A853	2	73	#NULL!	4	2	1	7	7046.58	5069.9	7215.39	#NULL!	5219.97	4850.6	#NULL!	7554.21	#NULL!	#NULL!	512	1	2	8	2	8	2	8	2	8	8	2	8	2	3	2	8	2	8	8	8	8	1	1	1
2015.01.07	A853910501	A8539105	2012	1	1	1	A853	1	37	#NULL!	4	4	4	1	7046.58	9315.99	#NULL!	#NULL!	10327.4	17265.5	#NULL!	#NULL!	#NULL!	#NULL!	512	1	2	8	2	8	2	8	8	8	8	2	8	1	8	2	8	2	8	8	8	8	1	1	1
2015.01.07	A853914401	A8539144	2012	1	1	1	A853	2	64	#NULL!	4	4	3	7	7046.58	5330.03	5676.79	19317.3	#NULL!	#NULL!	14978.6	#NULL!	#NULL!	#NULL!	512	1	2	8	2	8	2	8	2	8	8	2	8	1	8	2	8	2	8	8	8	8	1	1	1
2015.01.07	A853914402	A8539144	2012	1	1	1	A853	2	36	#NULL!	4	4	4	7	7046.58	6055.42	#NULL!	#NULL!	#NULL!	#NULL!	#NULL!	#NULL!	#NULL!	#NULL!	512	1	2	8	1	1	2	8	8	8	8	2	8	1	8	2	8	1	1	2	2	1	1	1	1
2015.01.07	A853914403	A8539144	2012	1	1	1	A853	2	32	#NULL!	4	4	4	3	7046.58	8693.54	#NULL!	30466	#NULL!	#NULL!	#NULL!	#NULL!	#NULL!	#NULL!	512	1	2	8	2	8	2	8	8	8	8	2	8	1	8	2	8	2	8	8	8	8	1	1	1
2015.01.07	A853917102	A8539171	2012	1	1	1	A853	2	70	#NULL!	4	2	4	7	7046.58	10139.8	14430.8	#NULL!	5219.97	9701.21	#NULL!	15108.4	#NULL!	#NULL!	512	1	2	8	2	8	2	8	2	8	8	2	8	1	8	2	8	2	8	8	8	8	1	1	1
2015.01.07	A853918601	A8539186	2012	1	1	1	A853	1	45	#NULL!	3	4	2	7	7046.58	10449.2	#NULL!	#NULL!	17232.6	22139.5	#NULL!	#NULL!	#NULL!	#NULL!	512	1	2	8	2	8	2	8	2	8	8	2	8	1	8	2	8	2	8	8	8	8	2	1	1
2015.01.07	A853918602	A8539186	2012	1	1	1	A853	2	46	#NULL!	3	4	3	3	7046.58	9199.3	26316.4	59026.1	9827.11	10912.4	76918.5	28432.6	74863	93704.6	512	1	1	2	2	8	2	8	2	8	8	2	8	1	8	2	8	2	8	8	8	8	2	2	1
2015.01.07	A853918603	A8539186	2012	1	1	1	A853	2	24	#NULL!	3	4	4	1	7046.58	7582.91	#NULL!	#NULL!	8324.3	13399.6	#NULL!	#NULL!	#NULL!	#NULL!	512	1	2	8	1	2	2	8	8	8	8	2	8	1	8	2	8	1	1	1	2	2	1	1	1
2015.01.07	A853918604	A8539186	2012	1	1	1	A853	2	21	#NULL!	3	4	3	1	7046.58	7582.91	#NULL!	#NULL!	8324.3	13399.6	#NULL!	#NULL!	#NULL!	#NULL!	512	1	2	8	1	2	2	8	8	8	8	2	8	1	8	2	8	1	2	2	1	1	2	1	1
2015.01.07	A853918605	A8539186	2012	1	1	1	A853	2	16	#NULL!	3	4	2	7	7046.58	11006.4	#NULL!	#NULL!	10460.8	16239	#NULL!	#NULL!	#NULL!	#NULL!	512	1	2	8	2	8	2	8	8	8	8	8	8	1	8	2	8	2	8	8	8	8	1	1	1
2015.01.07	A853918606	A8539186	2012	1	1	1	A853	2	76	#NULL!	4	4	1	7	7046.58	4906.97	#NULL!	#NULL!	4708.52	4850.6	#NULL!	#NULL!	#NULL!	#NULL!	512	1	2	8	2	8	2	8	2	8	8	2	8	1	8	2	8	2	8	8	8	8	1	1	1
2015.01.07	A853919802	A8539198	2012	1	1	1	A853	2	34	#NULL!	1	2	4	7	7046.58	8693.54	#NULL!	#NULL!	9085.88	11135.8	#NULL!	#NULL!	#NULL!	#NULL!	512	1	2	8	1	2	2	8	8	8	8	2	8	1	8	2	8	2	8	8	8	8	1	1	1
2015.01.07	A853919803	A8539198	2012	1	1	1	A853	2	10	#NULL!	2	2	1	#NULL!	7046.58	5838.26	#NULL!	17075.8	5174.69	8202.49	#NULL!	#NULL!	43690.6	#NULL!	512	1	2	8	2	8	2	8	8	8	8	8	8	8	8	8	8	2	8	8	8	8	1	1	1
2015.01.07	A853919804	A8539198	2012	1	1	1	A853	1	8	#NULL!	1	2	1	#NULL!	7046.58	5131.14	#NULL!	#NULL!	5531.32	7184.96	#NULL!	#NULL!	#NULL!	#NULL!	512	1	2	8	2	8	2	8	8	8	8	8	8	8	8	8	8	2	8	8	8	8	1	1	1
2015.01.07	A853920401	A8539204	2012	1	1	1	A853	1	75	#NULL!	1	1	1	6	7046.58	3694.86	6335.15	#NULL!	3879.18	4490.31	#NULL!	6991.44	#NULL!	#NULL!	512	1	2	8	2	8	2	8	2	8	8	2	8	1	8	2	8	2	8	8	8	8	1	1	1
2015.01.07	A853920402	A8539204	2012	1	1	1	A853	2	70	#NULL!	1	1	1	7	7046.58	5069.9	7215.39	#NULL!	5219.97	4850.6	#NULL!	7554.21	#NULL!	#NULL!	512	1	2	8	2	8	2	8	2	8	8	2	8	2	3	1	1	2	8	8	8	8	1	1	1
2015.01.07	A853921901	A8539219	2012	1	1	1	A853	1	32	#NULL!	4	4	4	5	7046.58	19788.9	#NULL!	#NULL!	19906.8	24829.6	#NULL!	#NULL!	#NULL!	#NULL!	512	1	2	8	2	8	2	8	8	8	8	2	8	1	8	2	8	2	8	8	8	8	2	2	1
2015.01.07	A853921903	A8539219	2012	1	1	1	A853	2	6	75	4	4	1	#NULL!	7046.58	7659.03	#NULL!	#NULL!	7626.35	12287.5	#NULL!	#NULL!	#NULL!	#NULL!	512	1	2	8	2	8	2	8	8	8	8	8	8	8	8	8	8	2	8	8	8	8	1	1	1
2015.01.07	A853921904	A8539219	2012	1	1	1	A853	1	4	58	4	4	1	#NULL!	7046.58	5318.33	#NULL!	#NULL!	5694.16	9127.89	#NULL!	#NULL!	#NULL!	#NULL!	512	1	2	8	2	8	2	8	8	8	8	8	8	8	8	8	8	8	8	8	8	8	8	8	8
2015.01.07	A853922801	A8539228	2012	1	1	1	A853	1	61	#NULL!	4	4	3	5	7046.58	7243.13	7062.43	#NULL!	#NULL!	#NULL!	#NULL!	#NULL!	#NULL!	#NULL!	512	1	2	8	2	8	2	8	2	8	8	2	8	1	8	1	1	2	8	8	8	8	1	2	1
2015.01.07	A853922802	A8539228	2012	1	1	1	A853	2	59	#NULL!	4	4	3	3	7046.58	5225.24	6974.39	24404.2	9424.68	9769.7	37925.7	15530.9	33120.9	49067.8	512	1	2	8	2	8	2	8	2	8	8	2	8	1	8	2	8	2	8	8	8	8	1	1	1
2015.01.07	A853922803	A8539228	2012	1	1	1	A853	1	34	#NULL!	4	4	4	5	7046.58	17541.7	#NULL!	43477.4	21278.4	24829.6	#NULL!	#NULL!	72376.6	#NULL!	512	1	2	8	2	8	2	8	8	8	8	2	8	1	8	2	8	2	8	8	8	8	1	1	1
2015.01.07	A853924302	A8539243	2012	1	1	1	A853	2	57	#NULL!	2	3	3	3	7046.58	7837.85	#NULL!	#NULL!	#NULL!	#NULL!	#NULL!	#NULL!	#NULL!	#NULL!	512	1	2	8	2	8	2	8	2	8	8	2	8	1	8	2	8	2	8	8	8	8	1	1	1
2015.01.07	A853924303	A8539243	2012	1	1	1	A853	1	24	#NULL!	2	3	3	7	7046.58	21593.9	#NULL!	57937.4	#NULL!	#NULL!	#NULL!	#NULL!	#NULL!	#NULL!	512	1	2	8	2	8	2	8	8	8	8	2	8	1	8	1	1	2	8	8	8	8	1	1	1
2015.01.07	A853924601	A8539246	2012	1	1	1	A853	1	68	#NULL!	1	1	2	7	7046.58	4574.41	6353.55	18776.8	5488.05	5330.38	26238.5	6769.83	26486.3	34334.2	512	1	2	8	2	8	2	8	2	8	8	2	8	1	8	2	8	2	8	8	8	8	1	1	1
2015.01.07	A853924602	A8539246	2012	1	1	1	A853	2	65	#NULL!	1	1	3	7	7046.58	3411.68	4772.35	#NULL!	3998.56	4122.62	#NULL!	5031.77	#NULL!	#NULL!	512	1	2	8	2	8	2	8	2	8	8	2	8	2	3	2	8	2	8	8	8	8	1	1	1
2015.01.07	A853926101	A8539261	2012	1	1	1	A853	1	64	#NULL!	2	2	3	3	7046.58	7243.13	7062.43	#NULL!	9660.99	6467.31	#NULL!	8171.03	#NULL!	#NULL!	512	1	2	8	1	2	2	8	2	8	8	2	8	2	3	2	8	1	1	2	2	1	2	2	1
2015.01.07	A853926102	A8539261	2012	1	1	1	A853	2	59	#NULL!	2	2	3	7	7046.58	5225.24	6974.39	#NULL!	6283.12	6513.13	#NULL!	7765.47	#NULL!	#NULL!	512	1	2	8	2	8	2	8	2	8	8	2	8	1	8	1	1	2	8	8	8	8	1	1	1
2015.01.07	A853926103	A8539261	2012	1	1	1	A853	2	1	17	2	2	1	#NULL!	7046.58	8189.97	#NULL!	#NULL!	12419.6	9164.88	#NULL!	#NULL!	#NULL!	#NULL!	512	1	8	8	8	8	8	8	8	8	8	8	8	8	8	8	8	8	8	8	8	8	8	8	8
2015.01.07	A853926104	A8539261	2012	1	1	1	A853	2	32	#NULL!	1	2	4	2	7046.58	8693.54	#NULL!	#NULL!	9085.88	11135.8	#NULL!	#NULL!	#NULL!	#NULL!	512	1	2	8	2	8	2	8	8	8	8	2	8	1	8	2	8	2	8	8	8	8	1	1	1
2015.01.07	A853926701	A8539267	2012	1	1	1	A853	1	71	#NULL!	2	2	1	7	7046.58	7135.15	#NULL!	#NULL!	3964.59	8980.62	#NULL!	#NULL!	#NULL!	#NULL!	512	1	2	8	2	8	2	8	2	8	8	2	8	2	3	2	8	2	8	8	8	8	1	1	1
2015.01.07	A853929701	A8539297	2012	1	1	1	A853	2	38	#NULL!	3	4	4	2	7046.58	6055.42	#NULL!	#NULL!	6801.8	9584.48	#NULL!	#NULL!	#NULL!	#NULL!	512	1	2	8	2	8	2	8	8	8	8	2	8	1	8	2	8	2	8	8	8	8	1	1	1
2015.01.07	A853929703	A8539297	2012	1	1	1	A853	1	10	#NULL!	3	4	1	#NULL!	7046.58	5391.44	#NULL!	#NULL!	5716.26	9208.61	#NULL!	#NULL!	#NULL!	#NULL!	512	1	2	8	2	8	2	8	8	8	8	8	8	8	8	8	8	2	8	8	8	8	1	1	1
2015.01.07	A853932401	A8539324	2012	1	1	1	A853	2	76	#NULL!	4	3	3	7	7046.58	4906.97	7215.39	#NULL!	4708.52	4850.6	#NULL!	7554.21	#NULL!	#NULL!	512	1	2	8	2	8	2	8	2	8	8	2	8	1	8	2	8	2	8	8	8	8	1	1	1
2015.01.07	A854901801	A8549018	2012	1	1	1	A854	1	46	#NULL!	2	3	3	5	10582.2	15692.1	21716.5	#NULL!	19982.2	23463.9	#NULL!	30758.8	#NULL!	#NULL!	512	1	2	8	2	8	2	8	2	8	8	2	8	1	8	2	8	2	8	8	8	8	1	1	1
2015.01.07	A854901802	A8549018	2012	1	1	1	A854	2	43	#NULL!	2	3	3	3	10582.2	8570.96	14410.8	#NULL!	8427.97	12527.8	#NULL!	14588.4	#NULL!	#NULL!	512	1	2	8	2	8	2	8	2	8	8	2	8	1	8	2	8	2	8	8	8	8	1	1	1
2015.01.07	A854901803	A8549018	2012	1	1	1	A854	2	16	#NULL!	2	3	2	7	10582.2	11667.4	#NULL!	#NULL!	13861.4	21517.9	#NULL!	#NULL!	#NULL!	#NULL!	512	1	2	8	2	8	2	8	8	8	8	8	8	1	8	2	8	2	8	8	8	8	1	1	1
2015.01.07	A854901804	A8549018	2012	1	1	1	A854	2	13	#NULL!	2	3	1	#NULL!	10582.2	7736.15	#NULL!	#NULL!	7313.99	10868.9	#NULL!	#NULL!	#NULL!	#NULL!	512	1	2	8	2	8	1	2	8	8	8	8	8	1	8	1	1	1	2	2	1	2	1	1	1
2015.01.07	A854903901	A8549039	2012	1	1	1	A854	1	47	#NULL!	3	3	4	2	10582.2	15692.1	21716.5	38490.5	#NULL!	#NULL!	41668.5	#NULL!	#NULL!	#NULL!	512	1	2	8	2	8	2	8	2	8	8	2	8	1	8	2	8	2	8	8	8	8	1	1	1
2015.01.07	A854903902	A8549039	2012	1	1	1	A854	2	44	#NULL!	3	3	4	7	10582.2	8570.96	14410.8	#NULL!	12642	16703.8	#NULL!	27579.8	#NULL!	#NULL!	512	1	2	8	2	8	2	8	1	3	2	2	8	1	8	2	8	2	8	8	8	8	1	1	1
2015.01.07	A854903903	A8549039	2012	1	1	1	A854	2	14	#NULL!	3	3	1	#NULL!	10582.2	7736.15	#NULL!	#NULL!	10971	14491.9	#NULL!	#NULL!	#NULL!	#NULL!	512	1	2	8	1	2	2	8	8	8	8	8	8	1	8	2	8	2	8	8	8	8	2	1	1
2015.01.07	A854903904	A8549039	2012	1	1	1	A854	2	11	#NULL!	3	3	1	#NULL!	10582.2	7521.25	#NULL!	50684.1	6399.74	14491.9	#NULL!	#NULL!	36022.6	#NULL!	512	1	2	8	2	8	2	8	8	8	8	8	8	8	8	8	8	2	8	8	8	8	1	1	1
2015.01.07	A854904202	A8549042	2012	1	1	1	A854	2	40	#NULL!	3	3	4	7	10582.2	17141.9	26114.7	#NULL!	8427.97	16703.8	#NULL!	27579.8	#NULL!	#NULL!	512	1	2	8	2	8	2	8	2	8	8	2	8	1	8	2	8	2	8	8	8	8	1	1	1
2015.01.07	A854904203	A8549042	2012	1	1	1	A854	1	15	#NULL!	3	3	1	7	10582.2	16140.2	#NULL!	#NULL!	14723.6	21930	#NULL!	#NULL!	#NULL!	#NULL!	512	1	2	8	1	2	2	8	8	8	8	8	8	1	8	2	8	1	2	1	1	2	2	1	1
2015.01.07	A854904204	A8549042	2012	1	1	1	A854	1	9	#NULL!	3	3	1	#NULL!	10582.2	6610.29	#NULL!	#NULL!	6840.8	12694.2	#NULL!	#NULL!	#NULL!	#NULL!	512	1	2	8	1	2	2	8	8	8	8	8	8	8	8	8	8	2	8	8	8	8	1	1	1
2015.01.07	A854906001	A8549060	2012	1	1	1	A854	1	43	#NULL!	3	3	4	2	10582.2	17380.3	28818.3	#NULL!	#NULL!	#NULL!	#NULL!	#NULL!	#NULL!	#NULL!	512	1	2	8	2	8	2	8	1	3	2	2	8	1	8	1	1	1	1	1	1	2	1	1	1
2015.01.07	A854906002	A8549060	2012	1	1	1	A854	2	40	#NULL!	3	3	4	7	10582.2	8570.96	#NULL!	38006.3	12642	16703.8	#NULL!	#NULL!	22985.5	#NULL!	512	1	2	8	2	8	2	8	2	8	8	2	8	1	8	1	2	2	8	8	8	8	1	1	1
2015.01.07	A854906003	A8549060	2012	1	1	1	A854	2	12	#NULL!	3	3	1	#NULL!	10582.2	7736.15	#NULL!	25342	10971	14491.9	#NULL!	#NULL!	13508.5	#NULL!	512	1	2	8	1	2	2	8	8	8	8	8	8	1	8	2	8	1	1	2	2	2	1	1	1
2015.01.07	A854906004	A8549060	2012	1	1	1	A854	2	8	#NULL!	3	3	1	#NULL!	10582.2	9866.91	#NULL!	#NULL!	9431.82	16281.9	#NULL!	#NULL!	#NULL!	#NULL!	512	1	1	2	1	2	2	8	8	8	8	8	8	8	8	8	8	1	1	2	2	2	2	2	1
2015.01.07	A854906301	A8549063	2012	1	1	1	A854	1	36	#NULL!	1	2	3	1	10582.2	13990.3	#NULL!	19339.4	13684.6	22443.8	#NULL!	#NULL!	18680.1	#NULL!	512	1	2	8	2	8	2	8	8	8	8	2	8	1	8	2	8	1	2	1	1	2	1	1	1
2015.01.07	A854906302	A8549063	2012	1	1	1	A854	2	42	#NULL!	1	2	3	7	10582.2	8570.96	14410.8	19003.1	8427.97	12527.8	21622.1	14588.4	15323.6	23148.9	512	1	2	8	1	2	2	8	2	8	8	2	8	1	8	2	8	1	2	1	1	2	1	1	1
2015.01.07	A854906303	A8549063	2012	1	1	1	A854	2	7	#NULL!	1	2	1	#NULL!	10582.2	9866.91	#NULL!	#NULL!	9431.82	12211.4	#NULL!	#NULL!	#NULL!	#NULL!	512	1	2	8	2	8	2	8	8	8	8	8	8	8	8	8	8	1	1	2	1	1	1	1	1
2015.01.07	A854906304	A8549063	2012	1	1	1	A854	2	2	27	1	2	1	#NULL!	10582.2	10550.9	#NULL!	#NULL!	7679.89	12144.2	#NULL!	#NULL!	#NULL!	#NULL!	512	1	8	8	8	8	8	8	8	8	8	8	8	8	8	8	8	8	8	8	8	8	8	8	8
2015.01.07	A854906601	A8549066	2012	1	1	1	A854	1	39	#NULL!	1	1	3	5	10582.2	13990.3	#NULL!	19339.4	13684.6	22443.8	#NULL!	#NULL!	18680.1	#NULL!	512	1	2	8	2	8	2	8	8	8	8	2	8	1	8	2	8	2	8	8	8	8	1	1	1
2015.01.07	A854906602	A8549066	2012	1	1	1	A854	2	39	#NULL!	1	1	3	7	10582.2	9093.76	#NULL!	18871.7	9012.92	12700.2	#NULL!	#NULL!	15075.1	#NULL!	512	1	2	8	2	8	2	8	8	8	8	2	8	1	8	2	8	2	8	8	8	8	1	1	1
2015.01.07	A854906603	A8549066	2012	1	1	1	A854	2	8	#NULL!	1	1	1	#NULL!	10582.2	9866.91	#NULL!	#NULL!	9431.82	12211.4	#NULL!	#NULL!	#NULL!	#NULL!	512	1	2	8	2	8	2	8	8	8	8	8	8	8	8	8	8	2	8	8	8	8	1	1	1
2015.01.07	A854909301	A8549093	2012	1	1	1	A854	2	39	#NULL!	2	2	3	3	10582.2	9093.76	#NULL!	#NULL!	9012.92	12700.2	#NULL!	#NULL!	#NULL!	#NULL!	512	1	2	8	2	8	2	8	8	8	8	2	8	1	8	2	8	1	1	1	1	2	1	1	1
2015.01.07	A854909303	A8549093	2012	1	1	1	A854	1	13	#NULL!	2	2	1	#NULL!	10582.2	7144.09	#NULL!	#NULL!	8079.45	12202.1	#NULL!	#NULL!	#NULL!	#NULL!	512	1	2	8	2	8	1	2	8	8	8	8	8	1	8	1	1	2	8	8	8	8	1	1	1
2015.01.07	A854909304	A8549093	2012	1	1	1	A854	2	12	#NULL!	2	2	1	#NULL!	10582.2	7736.15	#NULL!	#NULL!	7313.99	10868.9	#NULL!	#NULL!	#NULL!	#NULL!	512	1	2	8	2	8	2	8	8	8	8	8	8	1	8	2	8	1	1	1	1	2	1	1	1
2015.01.07	A854913201	A8549132	2012	1	1	1	A854	1	39	#NULL!	4	4	4	3	10582.2	13990.3	#NULL!	#NULL!	13684.6	22443.8	#NULL!	#NULL!	#NULL!	#NULL!	512	1	2	8	2	8	2	8	8	8	8	2	8	1	8	2	8	1	2	1	1	2	1	1	1
2015.01.07	A854913202	A8549132	2012	1	1	1	A854	2	31	#NULL!	4	4	3	3	10582.2	13055.6	#NULL!	39074	12039.5	14755.8	#NULL!	#NULL!	36008.9	#NULL!	512	1	2	8	2	8	2	8	8	8	8	2	8	1	8	2	8	2	8	8	8	8	1	1	1
2015.01.07	A854913203	A8549132	2012	1	1	1	A854	1	8	#NULL!	4	4	1	#NULL!	10582.2	6610.29	#NULL!	#NULL!	6840.8	9520.63	#NULL!	#NULL!	#NULL!	#NULL!	512	1	2	8	2	8	2	8	8	8	8	8	8	8	8	8	8	2	8	8	8	8	1	1	1
2015.01.07	A854913204	A8549132	2012	1	1	1	A854	2	4	59	4	4	1	#NULL!	10582.2	10550.9	#NULL!	#NULL!	9599.86	12144.2	#NULL!	#NULL!	#NULL!	#NULL!	512	1	2	8	2	8	2	8	8	8	8	8	8	8	8	8	8	8	8	8	8	8	8	8	8
2015.01.07	A854918601	A8549186	2012	1	1	1	A854	1	53	#NULL!	1	1	4	7	10582.2	19765.6	19731.2	39251.5	19209.6	21580.8	39813.9	25249.6	34697.9	47792.1	512	1	2	8	2	8	2	8	2	8	8	2	8	1	8	2	8	2	8	8	8	8	1	1	1
2015.01.07	A854918602	A8549186	2012	1	1	1	A854	2	47	#NULL!	1	1	4	6	10582.2	13815.1	16296.1	#NULL!	13021.7	14459.8	#NULL!	17412.3	#NULL!	#NULL!	512	1	2	8	2	8	2	8	2	8	8	2	8	1	8	2	8	1	1	2	1	2	1	1	1
2015.01.07	A854918604	A8549186	2012	1	1	1	A854	2	9	#NULL!	1	1	1	#NULL!	10582.2	9866.91	#NULL!	#NULL!	9431.82	12211.4	#NULL!	#NULL!	#NULL!	#NULL!	512	1	2	8	2	8	2	8	8	8	8	8	8	8	8	8	8	1	1	1	1	2	1	2	1
2015.01.07	A854920701	A8549207	2012	1	1	1	A854	1	37	#NULL!	3	3	4	2	10582.2	13990.3	#NULL!	#NULL!	#NULL!	#NULL!	#NULL!	#NULL!	#NULL!	#NULL!	512	1	2	8	2	8	2	8	8	8	8	2	8	1	8	2	8	2	8	8	8	8	1	1	1
2015.01.07	A854920703	A8549207	2012	1	1	1	A854	2	6	83	3	3	1	#NULL!	10582.2	9866.91	#NULL!	#NULL!	9431.82	20119.8	#NULL!	#NULL!	#NULL!	#NULL!	512	1	2	8	2	8	2	8	8	8	8	8	8	8	8	8	8	1	1	1	1	2	1	1	1
2015.01.07	A854920704	A8549207	2012	1	1	1	A854	2	4	57	4	3	1	#NULL!	10582.2	10550.9	#NULL!	#NULL!	9599.86	20053.6	#NULL!	#NULL!	#NULL!	#NULL!	512	1	2	8	2	8	2	8	8	8	8	8	8	8	8	8	8	8	8	8	8	8	8	8	8
2015.01.07	A854920705	A8549207	2012	1	1	1	A854	1	72	#NULL!	4	3	#NULL!	#NULL!	10582.2	5357.63	#NULL!	#NULL!	#NULL!	#NULL!	#NULL!	#NULL!	#NULL!	#NULL!	512	1	2	8	2	8	1	2	2	8	8	2	8	2	3	2	8	2	8	8	8	8	1	1	1
2015.01.07	A854925201	A8549252	2012	1	1	1	A854	1	59	#NULL!	2	3	3	6	10582.2	14564.4	13587.3	#NULL!	14072	13579.1	#NULL!	15602.2	#NULL!	#NULL!	512	1	2	8	2	8	2	8	2	8	8	2	8	1	8	2	8	2	8	8	8	8	1	1	1
2015.01.07	A854925202	A8549252	2012	1	1	1	A854	2	56	#NULL!	3	3	3	3	10582.2	7847.03	9200.53	31299.5	8325.63	8630.41	33354.1	10244.1	27308	38837.8	512	1	2	8	2	8	2	8	2	8	8	2	8	1	8	2	8	2	8	8	8	8	1	1	1
2015.01.07	A854927301	A8549273	2012	1	1	1	A854	1	46	#NULL!	3	3	3	1	10582.2	15692.1	21716.5	#NULL!	19982.2	23463.9	#NULL!	30758.8	#NULL!	#NULL!	512	1	2	8	2	8	2	8	2	8	8	1	2	1	8	2	8	2	8	8	8	8	1	1	1
2015.01.07	A854927302	A8549273	2012	1	1	1	A854	2	45	#NULL!	3	3	3	7	10582.2	13815.1	16296.1	#NULL!	13021.7	14459.8	#NULL!	17412.3	#NULL!	#NULL!	512	1	2	8	2	8	2	8	2	8	8	2	8	1	8	2	8	2	8	8	8	8	1	1	1
2015.01.07	A854927303	A8549273	2012	1	1	1	A854	1	14	#NULL!	3	3	1	#NULL!	10582.2	7144.09	#NULL!	55339.4	8079.45	12202.1	#NULL!	#NULL!	40479.7	#NULL!	512	1	2	8	2	8	2	8	8	8	8	8	8	1	8	2	8	1	1	1	1	2	1	1	1
2015.01.07	A854927304	A8549273	2012	1	1	1	A854	1	13	#NULL!	3	3	1	#NULL!	10582.2	7144.09	#NULL!	#NULL!	8079.45	12202.1	#NULL!	#NULL!	#NULL!	#NULL!	512	1	2	8	2	8	2	8	8	8	8	8	8	1	8	2	8	1	1	1	1	2	1	1	1
2015.01.07	A854929101	A8549291	2012	1	1	1	A854	1	46	#NULL!	1	1	3	7	10582.2	15692.1	21716.5	19245.2	19982.2	23463.9	20834.3	30758.8	19687.6	30392.6	512	1	2	8	2	8	2	8	2	8	8	2	8	1	8	2	8	2	8	8	8	8	1	1	1
2015.01.07	A854932401	A8549324	2012	1	1	1	A854	2	72	#NULL!	2	1	1	7	10582.2	7613.75	9518.46	84696	6916.87	6427.43	114187	9965.43	94086	126557	512	1	2	8	2	8	2	8	1	2	2	2	8	1	8	2	8	2	8	8	8	8	1	1	1
2015.01.07	A854932402	A8549324	2012	1	1	1	A854	1	14	#NULL!	1	1	1	#NULL!	10582.2	7144.09	#NULL!	#NULL!	8079.45	12202.1	#NULL!	#NULL!	#NULL!	#NULL!	512	1	2	8	2	8	2	8	8	8	8	8	8	1	8	2	8	2	8	8	8	8	1	1	1
2015.01.07	A855912302	A8559123	2012	1	1	1	A855	2	50	#NULL!	3	4	3	6	6482.85	8002.91	13997.9	#NULL!	5849.89	10730.8	#NULL!	15260.3	#NULL!	#NULL!	512	1	2	8	2	8	2	8	2	8	8	2	8	1	8	2	8	2	8	8	8	8	1	1	1
2015.01.07	A855912303	A8559123	2012	1	1	1	A855	2	24	#NULL!	3	4	4	7	6482.85	10464.4	#NULL!	35190.7	7658.36	18491.5	#NULL!	#NULL!	40018.5	#NULL!	512	1	2	8	2	8	2	8	8	8	8	2	8	1	8	1	2	1	1	1	1	2	1	1	1
2015.01.07	A855913501	A8559135	2012	1	1	1	A855	1	50	#NULL!	1	1	2	7	6482.85	12426.3	11725.7	29198.8	13337.2	14983.5	14196.2	14543.5	48396.4	14200.8	512	1	2	8	2	8	2	8	2	8	8	2	8	1	8	2	8	2	8	8	8	8	1	1	1
2015.01.07	A855913502	A8559135	2012	1	1	1	A855	2	20	#NULL!	1	1	3	7	6482.85	6976.28	#NULL!	#NULL!	7658.36	12327.7	#NULL!	#NULL!	#NULL!	#NULL!	512	1	2	8	2	8	2	8	8	8	8	2	8	1	8	2	8	1	2	1	1	2	1	1	1
2015.01.07	A855913503	A8559135	2012	1	1	1	A855	1	15	#NULL!	1	1	2	7	6482.85	18117	#NULL!	#NULL!	10222.6	15103.4	#NULL!	#NULL!	#NULL!	#NULL!	512	1	2	8	2	8	2	8	8	8	8	8	8	1	8	2	8	2	8	8	8	8	1	1	1
2015.01.07	A855914401	A8559144	2012	1	1	1	A855	2	63	#NULL!	1	1	1	7	6482.85	4903.63	4450.38	9215.08	5114.33	4528.61	9394.09	4659.96	10638.6	9127.67	512	1	2	8	2	8	2	8	2	8	8	2	8	1	8	2	8	2	8	8	8	8	1	1	1
2015.01.07	A855915901	A8559159	2012	1	1	1	A855	1	38	#NULL!	1	2	4	5	6482.85	8570.71	#NULL!	#NULL!	9501.2	15884.3	#NULL!	#NULL!	#NULL!	#NULL!	512	1	1	2	2	8	2	8	8	8	8	2	8	1	8	2	8	1	2	1	1	2	1	1	1
2015.01.07	A855915902	A8559159	2012	1	1	1	A855	2	71	#NULL!	4	2	3	7	6482.85	4664.31	5656.58	#NULL!	4802.37	4462.56	#NULL!	5739.97	#NULL!	#NULL!	512	1	2	8	2	8	2	8	2	8	8	2	8	2	3	2	8	2	8	8	8	8	1	1	1
2015.01.07	A855916801	A8559168	2012	1	1	1	A855	1	63	#NULL!	1	2	1	7	6482.85	6663.68	11073.3	15030.6	17776.2	11899.9	15568.9	12417.3	17167.2	15767.3	512	1	2	8	2	8	2	8	2	8	8	2	8	1	8	2	8	2	8	8	8	8	1	1	1
2015.01.07	A855916802	A8559168	2012	1	1	1	A855	2	59	#NULL!	2	2	1	7	6482.85	4807.22	#NULL!	#NULL!	#NULL!	#NULL!	#NULL!	#NULL!	#NULL!	#NULL!	512	1	2	8	2	8	2	8	2	8	8	2	8	1	8	1	2	1	2	1	1	2	1	1	1
2015.01.07	A855918001	A8559180	2012	1	1	1	A855	1	34	#NULL!	1	2	4	1	6482.85	16138.4	#NULL!	#NULL!	#NULL!	#NULL!	#NULL!	#NULL!	#NULL!	#NULL!	512	1	2	8	1	2	2	8	8	8	8	1	1	1	8	2	8	1	1	1	1	2	1	1	1
2015.01.07	A855918002	A8559180	2012	1	1	1	A855	2	28	#NULL!	1	2	4	7	6482.85	7514.52	#NULL!	#NULL!	#NULL!	#NULL!	#NULL!	#NULL!	#NULL!	#NULL!	512	1	2	8	2	8	2	8	8	8	8	2	8	1	8	2	8	2	8	8	8	8	1	1	1
2015.01.07	A855920401	A8559204	2012	1	1	1	A855	2	25	#NULL!	3	3	4	1	6482.85	10019.4	#NULL!	21435.8	11725.4	15741.3	#NULL!	#NULL!	26187.5	#NULL!	512	1	2	8	1	2	2	8	8	8	8	2	8	1	8	2	8	2	8	8	8	8	1	1	1
2015.01.07	A855920402	A8559204	2012	1	1	1	A855	2	27	#NULL!	3	3	4	7	6482.85	10019.4	#NULL!	#NULL!	11725.4	15741.3	#NULL!	#NULL!	#NULL!	#NULL!	512	1	1	2	2	8	2	8	8	8	8	2	8	1	8	2	8	2	8	8	8	8	1	1	1
2015.01.07	A855920404	A8559204	2012	1	1	1	A855	2	53	#NULL!	3	3	1	7	6482.85	7113.7	6998.95	23685	7799.85	9538.53	12652.2	7630.16	27789.6	12970.9	512	1	2	8	2	8	2	8	2	8	8	2	8	1	8	2	8	2	8	8	8	8	1	1	1
2015.01.07	A855921601	A8559216	2012	1	1	1	A855	1	43	#NULL!	4	4	4	1	6482.85	10647.4	16428	16384.8	13660.6	23845.5	18715.9	24519.6	25811.9	26182.5	512	1	2	8	2	8	2	8	2	8	8	2	8	1	8	2	8	2	8	8	8	8	1	1	1
2015.01.07	A855921602	A8559216	2012	1	1	1	A855	2	39	#NULL!	4	4	4	1	6482.85	5570.99	#NULL!	14038.5	6257.66	8817.73	#NULL!	#NULL!	14017.8	#NULL!	512	1	1	2	2	8	2	8	8	8	8	1	1	1	8	1	1	2	8	8	8	8	1	1	1
2015.01.07	A855921603	A8559216	2012	1	1	1	A855	1	5	69	4	4	1	#NULL!	6482.85	8281.84	#NULL!	#NULL!	6427.97	6610.16	#NULL!	#NULL!	#NULL!	#NULL!	512	1	2	8	1	2	1	2	8	8	8	8	8	8	8	8	8	8	8	8	8	8	8	8	8
2015.01.07	A855921604	A8559216	2012	1	1	1	A855	1	1	16	4	4	1	#NULL!	6482.85	8583.97	#NULL!	#NULL!	4411.48	6298.25	#NULL!	#NULL!	#NULL!	#NULL!	512	1	8	8	8	8	8	8	8	8	8	8	8	8	8	8	8	8	8	8	8	8	8	8	8
2015.01.07	A855922804	A8559228	2012	1	1	1	A855	2	57	#NULL!	1	1	1	6	6482.85	14421.7	5467.64	#NULL!	17341.4	20175.6	#NULL!	5900.5	#NULL!	#NULL!	512	1	2	8	2	8	2	8	2	8	8	1	1	1	8	2	8	2	8	8	8	8	1	1	1
2015.01.07	A855923401	A8559234	2012	1	1	1	A855	1	32	#NULL!	4	4	4	3	6482.85	16138.4	#NULL!	41480.7	#NULL!	#NULL!	#NULL!	#NULL!	#NULL!	#NULL!	512	1	2	8	1	2	2	8	8	8	8	2	8	1	8	2	8	2	8	8	8	8	1	1	1
2015.01.07	A855923402	A8559234	2012	1	1	1	A855	2	31	#NULL!	4	4	4	2	6482.85	7998.05	#NULL!	#NULL!	16718	20300.2	#NULL!	#NULL!	#NULL!	#NULL!	512	1	2	8	1	2	2	8	8	8	8	2	8	1	8	1	1	1	2	2	2	1	2	2	1
2015.01.07	A855925801	A8559258	2012	1	1	1	A855	2	41	#NULL!	4	4	4	1	6482.85	5250.71	8563.96	14136.3	5851.53	8698.06	15419.3	8402.77	14248.9	13756.8	512	1	2	8	2	8	2	8	2	8	8	2	8	1	8	2	8	2	8	8	8	8	1	1	1
2015.01.07	A855927301	A8559273	2012	1	1	1	A855	1	72	#NULL!	3	2	2	6	6482.85	3282.17	#NULL!	#NULL!	3647.42	4131.08	#NULL!	#NULL!	#NULL!	#NULL!	512	1	2	8	2	8	2	8	2	8	8	2	8	1	8	2	8	2	8	8	8	8	1	1	1
2015.01.07	A855927901	A8559279	2012	1	1	1	A855	1	71	#NULL!	3	2	1	6	6482.85	4923.25	#NULL!	#NULL!	5471.14	6196.62	#NULL!	#NULL!	#NULL!	#NULL!	512	1	2	8	2	8	2	8	2	8	8	2	8	1	8	1	1	2	8	8	8	8	1	1	1
2015.01.07	A855927902	A8559279	2012	1	1	1	A855	2	64	#NULL!	3	2	1	6	6482.85	7355.44	13351.1	#NULL!	7671.49	6792.91	#NULL!	13979.9	#NULL!	#NULL!	512	1	2	8	2	8	1	2	2	8	8	2	8	2	3	2	8	2	8	8	8	8	1	1	1
2015.01.07	A855929404	A8559294	2012	1	1	1	A855	1	73	#NULL!	2	2	3	6	6482.85	8205.42	7449.75	#NULL!	#NULL!	#NULL!	#NULL!	#NULL!	#NULL!	#NULL!	512	1	1	2	2	8	2	8	2	8	8	2	8	2	3	1	1	2	8	8	8	8	1	1	1
2015.01.07	A855929405	A8559294	2012	1	1	1	A855	2	65	#NULL!	2	2	2	6	6482.85	7846.85	5612	#NULL!	#NULL!	#NULL!	#NULL!	#NULL!	#NULL!	#NULL!	512	1	2	8	2	8	2	8	2	8	8	2	8	1	8	2	8	2	8	8	8	8	1	1	1
2015.01.07	A855930001	A8559300	2012	1	1	1	A855	1	63	#NULL!	4	4	4	7	6482.85	9995.53	#NULL!	#NULL!	13332.2	8924.89	#NULL!	#NULL!	#NULL!	#NULL!	512	1	2	8	2	8	2	8	2	8	8	2	8	3	2	1	1	1	1	2	2	1	1	1	1
2015.01.07	A855930002	A8559300	2012	1	1	1	A855	2	58	#NULL!	4	4	4	3	6482.85	7210.83	10935.3	#NULL!	8670.71	8988.12	#NULL!	11801	#NULL!	#NULL!	512	1	2	8	2	8	2	8	2	8	8	2	8	1	8	2	8	2	8	8	8	8	1	1	1
2015.01.07	A855931501	A8559315	2012	1	1	1	A855	2	52	#NULL!	4	4	1	3	6482.85	5335.27	6998.95	#NULL!	5849.89	7153.9	#NULL!	7630.16	#NULL!	#NULL!	512	1	2	8	2	8	2	8	2	8	8	2	8	1	8	2	8	2	8	8	8	8	1	1	1
2015.01.07	A855931801	A8559318	2012	1	1	1	A855	1	43	#NULL!	3	4	4	1	6482.85	10647.4	16428	32769.6	13660.6	23845.5	18715.9	24519.6	51623.7	26182.5	512	1	2	8	2	8	2	8	2	8	8	2	8	1	8	2	8	2	8	8	8	8	1	1	1
2015.01.07	A855931802	A8559318	2012	1	1	1	A855	2	37	#NULL!	4	4	4	2	6482.85	5570.99	#NULL!	#NULL!	6257.66	8817.73	#NULL!	#NULL!	#NULL!	#NULL!	512	1	2	8	1	2	2	8	8	8	8	2	8	2	3	2	8	2	8	8	8	8	1	1	1
2015.01.07	A855931803	A8559318	2012	1	1	1	A855	1	8	#NULL!	4	4	1	#NULL!	6482.85	8281.84	#NULL!	#NULL!	6427.97	6610.16	#NULL!	#NULL!	#NULL!	#NULL!	512	1	2	8	1	2	1	2	8	8	8	8	8	8	8	8	8	1	1	1	1	2	1	1	1
2015.01.07	A856905101	A8569051	2012	1	1	1	A856	2	66	#NULL!	1	1	1	7	7422.4	3593.63	5644.21	7145.54	4211.81	4342.5	9777.77	5951.02	6459.11	9216.18	512	1	2	8	2	8	2	8	2	8	8	2	8	1	8	2	8	2	8	8	8	8	1	1	1
2015.01.07	A856907201	A8569072	2012	1	1	1	A856	2	47	#NULL!	3	4	3	2	7422.4	9689.92	14609.9	#NULL!	10351.2	11494.4	#NULL!	15610.6	#NULL!	#NULL!	512	1	2	8	1	2	2	8	2	8	8	2	8	1	8	2	8	2	8	8	8	8	1	1	1
2015.01.07	A856908701	A8569087	2012	1	1	1	A856	1	49	#NULL!	4	4	4	1	7422.4	11006.5	19469.5	#NULL!	#NULL!	#NULL!	#NULL!	#NULL!	#NULL!	#NULL!	512	1	2	8	2	8	2	8	2	8	8	2	8	1	8	2	8	2	8	8	8	8	1	1	1
2015.01.07	A856917101	A8569171	2012	1	1	1	A856	1	55	#NULL!	4	4	4	1	7422.4	10215.5	18272.1	30263.9	11186.1	10794.3	41865.4	20981.7	27452.7	39566.8	512	1	2	8	2	8	2	8	2	8	8	2	8	1	8	1	1	2	8	8	8	8	1	1	1
2015.01.07	A856917102	A8569171	2012	1	1	1	A856	2	52	#NULL!	4	4	3	7	7422.4	6108.5	15838	#NULL!	6697.7	8190.69	#NULL!	17814.6	#NULL!	#NULL!	512	1	2	8	2	8	2	8	2	8	8	2	8	1	8	2	8	2	8	8	8	8	1	1	1
2015.01.07	A856917104	A8569171	2012	1	1	1	A856	2	76	#NULL!	4	4	1	7	7422.4	5168.68	#NULL!	#NULL!	4959.64	5109.3	#NULL!	#NULL!	#NULL!	#NULL!	512	1	2	8	2	8	2	8	1	2	2	2	8	3	3	2	8	2	8	8	8	8	1	1	1
2015.01.07	A856918601	A8569186	2012	1	1	1	A856	2	39	#NULL!	4	4	3	3	7422.4	6378.37	#NULL!	#NULL!	#NULL!	#NULL!	#NULL!	#NULL!	#NULL!	#NULL!	512	1	2	8	2	8	2	8	8	8	8	2	8	1	8	2	8	2	8	8	8	8	1	1	1
2015.01.07	A856919801	A8569198	2012	1	1	1	A856	1	35	#NULL!	1	2	3	5	7422.4	9812.84	#NULL!	58526.3	10878.2	18186.3	#NULL!	#NULL!	68034.3	#NULL!	512	1	2	8	2	8	2	8	8	8	8	2	8	1	8	2	8	2	8	8	8	8	1	1	1
2015.01.07	A856919802	A8569198	2012	1	1	1	A856	2	33	#NULL!	2	2	3	7	7422.4	9157.19	#NULL!	#NULL!	9570.46	11729.7	#NULL!	#NULL!	#NULL!	#NULL!	512	1	2	8	1	2	2	8	8	8	8	2	8	1	8	1	1	2	8	8	8	8	1	1	1
2015.01.07	A856919803	A8569198	2012	1	1	1	A856	1	2	25	2	2	1	#NULL!	7422.4	4914.01	#NULL!	#NULL!	5050.82	7211.04	#NULL!	#NULL!	#NULL!	#NULL!	512	1	8	8	8	8	8	8	8	8	8	8	8	8	8	8	8	8	8	8	8	8	8	8	8
2015.01.07	A856919804	A8569198	2012	1	1	1	A856	1	59	#NULL!	2	2	3	7	7422.4	10215.5	12181.4	#NULL!	11186.1	10794.3	#NULL!	13987.8	#NULL!	#NULL!	512	1	2	8	2	8	2	8	2	8	8	2	8	1	8	2	8	2	8	8	8	8	1	1	1
2015.01.07	A856919805	A8569198	2012	1	1	1	A856	2	59	#NULL!	2	2	2	5	7422.4	5503.91	8248.54	#NULL!	6618.22	6860.5	#NULL!	9184.14	#NULL!	#NULL!	512	1	2	8	2	8	2	8	2	8	8	2	8	1	8	2	8	2	8	8	8	8	1	1	1
2015.01.07	A856919806	A8569198	2012	1	1	1	A856	2	33	#NULL!	2	2	4	7	7422.4	9157.19	#NULL!	#NULL!	9570.46	11729.7	#NULL!	#NULL!	#NULL!	#NULL!	512	1	2	8	2	8	2	8	8	8	8	2	8	1	8	2	8	2	8	8	8	8	1	1	1
2015.01.07	A856923101	A8569231	2012	1	1	1	A856	1	45	#NULL!	2	3	3	3	7422.4	11006.5	19469.5	14752.1	18151.6	23320.3	22414.2	27760.9	22865.4	27247.8	512	1	2	8	2	8	2	8	2	8	8	2	8	1	8	2	8	2	8	8	8	8	1	1	1
2015.01.07	A856923102	A8569231	2012	1	1	1	A856	2	41	#NULL!	2	3	3	7	7422.4	6011.68	12919.7	14566.5	6699.58	9958.65	23261.8	13078.9	17797.1	20753.6	512	1	2	8	2	8	2	8	2	8	8	2	8	1	8	2	8	2	8	8	8	8	1	1	1
2015.01.07	A856923103	A8569231	2012	1	1	1	A856	1	15	#NULL!	2	3	2	7	7422.4	11254.5	#NULL!	#NULL!	11704.1	17292.3	#NULL!	#NULL!	#NULL!	#NULL!	512	1	2	8	2	8	2	8	8	8	8	8	8	1	8	2	8	2	8	8	8	8	1	1	1
2015.01.07	A856923401	A8569234	2012	1	1	1	A856	1	36	#NULL!	4	4	4	5	7422.4	9812.84	#NULL!	29648.5	10878.2	18186.3	#NULL!	#NULL!	28927	#NULL!	512	1	2	8	2	8	2	8	8	8	8	2	8	1	8	2	8	1	1	1	1	2	1	1	1
2015.01.07	A856923402	A8569234	2012	1	1	1	A856	2	32	#NULL!	4	4	4	7	7422.4	9157.19	#NULL!	#NULL!	9570.46	11729.7	#NULL!	#NULL!	#NULL!	#NULL!	512	1	2	8	2	8	2	8	8	8	8	2	8	1	8	2	8	2	8	8	8	8	1	1	1
2015.01.07	A856923403	A8569234	2012	1	1	1	A856	1	6	75	4	4	1	#NULL!	7422.4	4741.05	#NULL!	#NULL!	4906.38	7568.16	#NULL!	#NULL!	#NULL!	#NULL!	512	1	2	8	2	8	2	8	8	8	8	8	8	8	8	8	8	2	8	8	8	8	1	1	1
2015.01.07	A856923404	A8569234	2012	1	1	1	A856	1	3	42	4	4	1	#NULL!	7422.4	4914.01	#NULL!	#NULL!	5050.82	7211.04	#NULL!	#NULL!	#NULL!	#NULL!	512	1	8	8	8	8	8	8	8	8	8	8	8	8	8	8	8	8	8	8	8	8	8	8	8
2015.01.07	A856924301	A8569243	2012	1	1	1	A856	2	24	#NULL!	2	2	4	1	7422.4	7987.33	#NULL!	12087.2	8768.26	14114.3	#NULL!	#NULL!	11107.4	#NULL!	512	1	2	8	2	8	2	8	8	8	8	2	8	1	8	2	8	2	8	8	8	8	1	1	1
2015.01.07	A856925502	A8569255	2012	1	1	1	A856	2	35	#NULL!	3	4	3	3	7422.4	12756.7	#NULL!	#NULL!	7164.57	13460.9	#NULL!	#NULL!	#NULL!	#NULL!	512	1	2	8	2	8	2	8	8	8	8	2	8	1	8	2	8	2	8	8	8	8	1	1	1
2015.01.07	A856925503	A8569255	2012	1	1	1	A856	1	7	#NULL!	4	4	1	#NULL!	7422.4	4741.05	#NULL!	#NULL!	4906.38	10090.9	#NULL!	#NULL!	#NULL!	#NULL!	512	1	2	8	2	8	2	8	8	8	8	8	8	8	8	8	8	2	8	8	8	8	1	1	1
2015.01.07	A856925504	A8569255	2012	1	1	1	A856	2	5	71	4	4	1	#NULL!	7422.4	7076.77	#NULL!	#NULL!	6764.71	12942.8	#NULL!	#NULL!	#NULL!	#NULL!	512	1	2	8	2	8	2	8	8	8	8	8	8	8	8	8	8	8	8	8	8	8	8	8	8
2015.01.07	A856927002	A8569270	2012	1	1	1	A856	1	41	#NULL!	#NULL!	#NULL!	3	7	7422.4	18285.8	#NULL!	25325.2	15640.4	24074.7	#NULL!	#NULL!	32239.3	#NULL!	512	1	2	8	2	8	2	8	2	8	8	2	8	1	8	2	8	2	8	8	8	8	1	1	1
2015.01.07	A856927003	A8569270	2012	1	1	1	A856	2	35	#NULL!	#NULL!	#NULL!	3	7	7422.4	9567.56	#NULL!	21698.6	7164.57	15143.5	#NULL!	#NULL!	17508.4	#NULL!	512	1	2	8	2	8	2	8	8	8	8	2	8	2	3	2	8	2	8	8	8	8	1	1	1
2015.01.07	A856927601	A8569276	2012	1	1	1	A856	1	76	#NULL!	4	2	2	1	7422.4	3891.92	7492.52	#NULL!	4086.07	4729.79	#NULL!	8268.71	#NULL!	#NULL!	512	1	2	8	2	8	2	8	2	8	8	1	1	1	8	2	8	2	8	8	8	8	1	1	1
2015.01.07	A856927602	A8569276	2012	1	1	1	A856	1	51	#NULL!	2	2	3	5	7422.4	14227.2	17689.6	#NULL!	15270.1	17155	#NULL!	22637	#NULL!	#NULL!	512	1	2	8	2	8	2	8	2	8	8	2	8	1	8	2	8	2	8	8	8	8	1	1	1
2015.01.07	A856927603	A8569276	2012	1	1	1	A856	2	48	#NULL!	2	2	2	3	7422.4	9689.92	14609.9	#NULL!	10351.2	11494.4	#NULL!	15610.6	#NULL!	#NULL!	512	1	2	8	2	8	2	8	2	8	8	2	8	1	8	2	8	2	8	8	8	8	1	1	1
2015.01.07	A856927604	A8569276	2012	1	1	1	A856	1	13	#NULL!	2	2	1	#NULL!	7422.4	4981.57	#NULL!	#NULL!	6422.53	9699.73	#NULL!	#NULL!	#NULL!	#NULL!	512	1	2	8	2	8	2	8	8	8	8	8	8	1	8	2	8	2	8	8	8	8	1	1	1
2015.01.07	A856927605	A8569276	2012	1	1	1	A856	1	12	#NULL!	2	2	1	#NULL!	7422.4	4981.57	#NULL!	33075.6	6422.53	9699.73	#NULL!	#NULL!	39178	#NULL!	512	1	2	8	2	8	2	8	8	8	8	8	8	1	8	2	8	2	8	8	8	8	1	1	1
2015.01.07	A856928802	A8569288	2012	1	1	1	A856	2	54	#NULL!	3	4	3	3	7422.4	18216.9	#NULL!	#NULL!	16744.3	20701.8	#NULL!	#NULL!	#NULL!	#NULL!	512	1	2	8	2	8	2	8	2	8	8	2	8	1	8	2	8	2	8	8	8	8	1	1	1
2015.01.07	A856929401	A8569294	2012	1	1	1	A856	1	74	#NULL!	4	3	3	7	7422.4	5636.77	#NULL!	#NULL!	6264.05	7094.69	#NULL!	#NULL!	#NULL!	#NULL!	512	1	2	8	2	8	2	8	2	8	8	2	8	1	8	2	8	2	8	8	8	8	1	1	1
2015.01.07	A856929402	A8569294	2012	1	1	1	A856	2	56	#NULL!	3	3	2	7	7422.4	8255.87	#NULL!	35988.1	9927.33	10290.8	#NULL!	#NULL!	31715.8	#NULL!	512	1	2	8	2	8	2	8	2	8	8	2	8	1	8	2	8	2	8	8	8	8	1	1	1
2015.01.07	A856930001	A8569300	2012	1	1	1	A856	1	63	#NULL!	2	3	4	3	7422.4	7629.43	8352.67	11616	15264.4	10218.4	23487.3	9663.79	21442.1	23786.8	512	1	2	8	2	8	2	8	2	8	8	2	8	1	8	2	8	2	8	8	8	8	1	1	1
2015.01.07	A856930002	A8569300	2012	1	1	1	A856	2	59	#NULL!	2	3	3	3	7422.4	5503.91	8248.54	#NULL!	9927.33	10290.8	#NULL!	9184.14	#NULL!	#NULL!	512	1	2	8	2	8	2	8	2	8	8	2	8	1	8	2	8	2	8	8	8	8	1	1	1
2015.01.07	A856930003	A8569300	2012	1	1	1	A856	2	33	#NULL!	2	3	4	7	7422.4	9157.19	#NULL!	22463.6	#NULL!	#NULL!	#NULL!	#NULL!	#NULL!	#NULL!	512	1	2	8	2	8	2	8	8	8	8	2	8	1	8	2	8	1	2	1	1	2	1	1	1
2015.01.07	A856930602	A8569306	2012	1	1	1	A856	2	55	#NULL!	3	4	2	3	7422.4	16511.7	16497.1	35988.1	19394.9	20175.6	35883.5	18368.3	31715.8	34819.2	512	1	2	8	2	8	2	8	2	8	8	2	8	2	3	1	1	1	2	2	2	2	1	2	1
2015.01.07	A856931801	A8569318	2012	1	1	1	A856	1	72	#NULL!	3	2	3	6	7422.4	3757.85	7492.52	#NULL!	6264.05	7094.69	#NULL!	8268.71	#NULL!	#NULL!	512	1	2	8	2	8	2	8	2	8	8	2	8	3	3	1	1	2	8	8	8	8	1	1	1
2015.01.07	A856931802	A8569318	2012	1	1	1	A856	2	71	#NULL!	4	2	3	7	7422.4	5340.29	8533.57	#NULL!	8247.55	7663.95	#NULL!	8934.29	#NULL!	#NULL!	512	1	2	8	1	2	2	8	2	8	8	2	8	2	3	1	1	1	1	1	1	2	1	1	1
2015.01.07	A856931803	A8569318	2012	1	1	1	A856	2	37	#NULL!	1	2	4	1	7422.4	6378.37	#NULL!	#NULL!	#NULL!	#NULL!	#NULL!	#NULL!	#NULL!	#NULL!	512	1	2	8	2	8	2	8	8	8	8	2	8	1	8	2	8	2	8	8	8	8	1	1	1
2015.01.07	A857913201	A8579132	2012	1	1	1	A857	1	65	#NULL!	1	1	1	6	5127.93	3328.88	#NULL!	#NULL!	3523.9	3422.67	#NULL!	#NULL!	#NULL!	#NULL!	512	1	2	8	2	8	2	8	2	8	8	2	8	1	8	2	8	2	8	8	8	8	1	1	1
2015.01.07	A857913202	A8579132	2012	1	1	1	A857	2	55	#NULL!	1	1	2	6	5127.93	3802.5	7563.33	15437.9	4034.43	4182.12	21935.1	7579.1	16326.3	25541.4	512	1	2	8	2	8	2	8	2	8	8	2	8	1	8	2	8	2	8	8	8	8	1	1	1
2015.01.07	A857913502	A8579135	2012	1	1	1	A857	2	56	#NULL!	3	3	2	7	5127.93	5703.76	7563.33	#NULL!	4034.43	6273.18	#NULL!	7579.1	#NULL!	#NULL!	512	1	2	8	2	8	2	8	2	8	8	2	8	1	8	2	8	2	8	8	8	8	1	1	1
2015.01.07	A857913503	A8579135	2012	1	1	1	A857	1	29	#NULL!	3	3	4	3	5127.93	13528.4	#NULL!	22343.2	11439.7	26219.3	#NULL!	#NULL!	32882.5	#NULL!	512	1	2	8	1	2	1	2	8	8	8	2	8	1	8	2	8	2	8	8	8	8	1	1	1
2015.01.07	A857914102	A8579141	2012	1	1	1	A857	2	54	#NULL!	3	4	4	2	5127.93	8440.39	4840.79	#NULL!	8165.75	9985.99	#NULL!	4900.41	#NULL!	#NULL!	512	1	2	8	2	8	2	8	2	8	8	2	8	1	8	2	8	2	8	8	8	8	1	1	1
2015.01.07	A857915001	A8579150	2012	1	1	1	A857	1	61	#NULL!	3	3	3	2	5127.93	5270.97	3829.41	#NULL!	6203.38	4152.69	#NULL!	3987.46	#NULL!	#NULL!	512	1	2	8	2	8	2	8	2	8	8	2	8	1	8	1	1	2	8	8	8	8	1	2	1
2015.01.07	A857915002	A8579150	2012	1	1	1	A857	2	58	#NULL!	3	3	3	7	5127.93	3802.5	3781.67	#NULL!	4034.43	4182.12	#NULL!	3789.55	#NULL!	#NULL!	512	1	2	8	2	8	2	8	1	3	2	2	8	1	8	2	8	2	8	8	8	8	1	1	1
2015.01.07	A857915003	A8579150	2012	1	1	1	A857	1	31	#NULL!	3	3	4	1	5127.93	12765.4	#NULL!	55007	12782.2	18471.3	#NULL!	#NULL!	72376.6	#NULL!	512	1	2	8	1	2	2	8	8	8	8	2	8	1	8	2	8	2	8	8	8	8	1	1	1
2015.01.07	A857915004	A8579150	2012	1	1	1	A857	2	31	#NULL!	3	3	4	1	5127.93	6326.46	#NULL!	#NULL!	5834.09	7150.33	#NULL!	#NULL!	#NULL!	#NULL!	512	1	1	2	2	8	2	8	8	8	8	2	8	1	8	2	8	1	1	1	1	2	1	2	1
2015.01.07	A857917701	A8579177	2012	1	1	1	A857	1	65	#NULL!	2	2	1	7	5127.93	3328.88	3445.04	4454.28	3523.9	3422.67	7587.79	3303.68	4895.96	8936.04	512	1	2	8	2	8	2	8	2	8	8	2	8	1	8	1	2	2	8	8	8	8	2	1	1
2015.01.07	A857918301	A8579183	2012	1	1	1	A857	2	27	#NULL!	1	2	#NULL!	#NULL!	5127.93	5943.98	#NULL!	10659.7	6137.7	8239.88	#NULL!	#NULL!	12628	#NULL!	512	1	2	8	2	8	2	8	8	8	8	2	8	1	8	2	8	1	1	2	1	2	1	1	1
2015.01.07	A857918302	A8579183	2012	1	1	1	A857	1	26	#NULL!	1	2	3	3	5127.93	9018.92	#NULL!	11171.6	11439.7	18658.1	#NULL!	#NULL!	16441.3	#NULL!	512	1	9	9	9	9	9	9	8	8	8	9	9	9	9	9	9	9	9	9	9	9	9	9	9
2015.01.07	A857918303	A8579183	2012	1	1	1	A857	2	53	#NULL!	1	2	#NULL!	7	5127.93	4220.2	4840.79	#NULL!	4082.88	4992.99	#NULL!	4900.41	#NULL!	#NULL!	512	1	2	8	2	8	2	8	2	8	8	2	8	1	8	2	8	2	8	8	8	8	1	1	1
2015.01.07	A857918601	A8579186	2012	1	1	1	A857	1	51	#NULL!	1	1	2	5	5127.93	9829.16	8110.05	#NULL!	15514.3	15686.4	#NULL!	9340.45	#NULL!	#NULL!	512	1	2	8	1	2	2	8	1	1	2	2	8	1	8	2	8	2	8	8	8	8	1	1	1
2015.01.07	A857918604	A8579186	2012	1	1	1	A857	1	19	#NULL!	1	1	3	3	5127.93	8690.22	#NULL!	25144.5	#NULL!	#NULL!	#NULL!	#NULL!	#NULL!	#NULL!	512	1	2	8	2	8	2	8	8	8	8	2	8	1	8	1	1	1	2	2	2	2	1	1	1
2015.01.07	A857918605	A8579186	2012	1	1	1	A857	2	12	#NULL!	1	1	1	#NULL!	5127.93	3957.04	#NULL!	#NULL!	5907.01	7900.29	#NULL!	#NULL!	#NULL!	#NULL!	512	1	2	8	2	8	2	8	8	8	8	8	8	1	8	2	8	2	8	8	8	8	1	2	1
2015.01.07	A857918606	A8579186	2012	1	1	1	A857	1	6	76	1	1	1	#NULL!	5127.93	3477.77	#NULL!	#NULL!	3599.04	6920.25	#NULL!	#NULL!	#NULL!	#NULL!	512	1	2	8	2	8	2	8	8	8	8	8	8	8	8	8	8	2	8	8	8	8	1	1	1
2015.01.07	A857921301	A8579213	2012	1	1	1	A857	1	81	#NULL!	2	1	2	7	5127.93	2688.82	#NULL!	#NULL!	2490.84	2883.25	#NULL!	#NULL!	#NULL!	#NULL!	512	1	9	9	9	9	9	9	9	9	9	9	9	9	9	9	9	9	9	9	9	9	9	9	9
2015.01.07	A857921602	A8579216	2012	1	1	1	A857	2	41	#NULL!	3	3	3	5	5127.93	4153.31	5923.22	#NULL!	6126.03	9106.09	#NULL!	10793.2	#NULL!	#NULL!	512	1	2	8	2	8	2	8	2	8	8	2	8	1	8	2	8	2	8	8	8	8	1	1	1
2015.01.07	A857921603	A8579216	2012	1	1	1	A857	2	18	#NULL!	3	3	3	7	5127.93	5967.89	#NULL!	11370.1	10075.4	15640.7	#NULL!	#NULL!	25901.6	#NULL!	512	1	2	8	2	8	2	8	8	8	8	8	8	1	8	1	1	2	8	8	8	8	1	1	1
2015.01.07	A857922201	A8579222	2012	1	1	1	A857	1	32	#NULL!	4	4	3	2	5127.93	12765.4	#NULL!	#NULL!	#NULL!	#NULL!	#NULL!	#NULL!	#NULL!	#NULL!	512	1	2	8	2	8	2	8	8	8	8	2	8	1	8	2	8	2	8	8	8	8	1	2	1
2015.01.07	A857922202	A8579222	2012	1	1	1	A857	2	33	#NULL!	4	4	3	7	5127.93	6326.46	#NULL!	19272.6	11668.2	10725.5	#NULL!	#NULL!	21528.2	#NULL!	512	1	2	8	2	8	2	8	8	8	8	2	8	1	8	2	8	1	1	2	1	2	1	1	1
2015.01.07	A857922203	A8579222	2012	1	1	1	A857	1	9	#NULL!	4	4	1	#NULL!	5127.93	3477.77	#NULL!	#NULL!	3599.04	6920.25	#NULL!	#NULL!	#NULL!	#NULL!	512	1	2	8	2	8	2	8	8	8	8	8	8	8	8	8	8	2	8	8	8	8	1	1	1
2015.01.07	A857923101	A8579231	2012	1	1	1	A857	1	66	#NULL!	1	1	4	7	5127.93	3328.88	3445.04	#NULL!	3523.9	3422.67	#NULL!	3303.68	#NULL!	#NULL!	512	1	2	8	2	8	2	8	2	8	8	1	2	1	8	2	8	1	1	2	2	2	2	1	1
2015.01.07	A857924001	A8579240	2012	1	1	1	A857	1	67	#NULL!	1	1	3	7	5127.93	3328.88	3445.04	#NULL!	3523.9	3422.67	#NULL!	3303.68	#NULL!	#NULL!	512	1	2	8	1	2	2	8	2	8	8	2	8	3	3	2	8	1	1	2	2	2	1	1	1
2015.01.07	A857925501	A8579255	2012	1	1	1	A857	2	61	#NULL!	2	2	1	7	5127.93	3878.77	6156.17	#NULL!	3569.5	3160.7	#NULL!	5985.65	#NULL!	#NULL!	512	1	2	8	2	8	2	8	1	1	2	2	8	1	8	2	8	2	8	8	8	8	1	1	1
2015.01.07	A857925503	A8579255	2012	1	1	1	A857	2	77	#NULL!	3	2	#NULL!	#NULL!	5127.93	3570.9	#NULL!	#NULL!	3023.36	3114.6	#NULL!	#NULL!	#NULL!	#NULL!	512	1	2	8	2	8	2	8	1	1	1	2	8	1	8	2	8	2	8	8	8	8	1	1	1
2015.01.07	A857925504	A8579255	2012	1	1	1	A857	2	2	28	1	2	1	#NULL!	5127.93	5550.98	#NULL!	#NULL!	5050.62	5884.81	#NULL!	#NULL!	#NULL!	#NULL!	512	1	8	8	8	8	8	8	8	8	8	8	8	8	8	8	8	8	8	8	8	8	8	8	8
2015.01.07	A857926701	A8579267	2012	1	1	1	A857	2	21	#NULL!	1	2	2	3	5127.93	5518.23	#NULL!	#NULL!	5345.08	8603.98	#NULL!	#NULL!	#NULL!	#NULL!	512	1	2	8	2	8	2	8	8	8	8	2	8	1	8	2	8	2	8	8	8	8	1	1	1
2015.01.07	A857926702	A8579267	2012	1	1	1	A857	2	47	#NULL!	1	2	3	3	5127.93	6694.5	6698.15	#NULL!	6310.04	7006.93	#NULL!	6441.23	#NULL!	#NULL!	512	1	2	8	2	8	2	8	2	8	8	2	8	1	8	2	8	2	8	8	8	8	1	1	1
2015.01.07	A857928201	A8579282	2012	1	1	1	A857	1	37	#NULL!	2	3	4	1	5127.93	6779.42	#NULL!	9538.82	6631.27	11086.3	#NULL!	#NULL!	11168	#NULL!	512	1	2	8	1	2	2	8	8	8	8	2	8	1	8	2	8	1	1	2	1	2	2	1	1
2015.01.07	A857928202	A8579282	2012	1	1	1	A857	2	33	#NULL!	2	3	4	7	5127.93	6326.46	#NULL!	9636.29	5834.09	7150.33	#NULL!	#NULL!	10764.1	#NULL!	512	1	1	2	2	8	2	8	8	8	8	2	8	1	8	2	8	2	8	8	8	8	2	1	1
2015.01.07	A857928203	A8579282	2012	1	1	1	A857	2	4	52	3	3	1	#NULL!	5127.93	5550.98	#NULL!	#NULL!	5050.62	5884.81	#NULL!	#NULL!	#NULL!	#NULL!	512	1	2	8	2	8	1	2	8	8	8	8	8	8	8	8	8	8	8	8	8	8	8	8	8
2015.01.07	A857928204	A8579282	2012	1	1	1	A857	1	1	21	3	3	1	#NULL!	5127.93	3604.65	#NULL!	#NULL!	3705	4395.8	#NULL!	#NULL!	#NULL!	#NULL!	512	1	8	8	8	8	8	8	8	8	8	8	8	8	8	8	8	8	8	8	8	8	8	8	8
2015.01.07	A857930302	A8579303	2012	1	1	1	A857	2	43	#NULL!	2	3	4	7	5127.93	8306.62	11846.4	18745.9	6126.03	8094.3	28439.3	10793.2	18322.7	30447.4	512	1	2	8	2	8	2	8	1	1	1	2	8	1	8	2	8	2	8	8	8	8	1	1	1
2015.01.07	A857930303	A8579303	2012	1	1	1	A857	2	14	#NULL!	2	3	1	#NULL!	5127.93	3957.04	#NULL!	#NULL!	5316.31	7022.48	#NULL!	#NULL!	#NULL!	#NULL!	512	1	2	8	2	8	2	8	8	8	8	8	8	1	8	2	8	2	8	8	8	8	1	1	1
2015.01.07	A857930304	A8579303	2012	1	1	1	A857	1	11	#NULL!	2	3	1	#NULL!	5127.93	3654.2	#NULL!	18196.8	3719.38	7883.86	#NULL!	#NULL!	12100.5	#NULL!	512	1	2	8	2	8	2	8	8	8	8	8	8	8	8	8	8	1	1	2	2	2	2	1	1
2015.01.07	A857931201	A8579312	2012	1	1	1	A857	1	41	#NULL!	1	2	#NULL!	#NULL!	5127.93	8422.11	11362.3	21727.7	9534.3	16642.7	17259.7	15747.5	33191.5	28974.4	512	1	2	8	2	8	2	8	2	8	8	2	8	1	8	2	8	1	1	2	1	2	1	1	1
2015.01.07	A857931202	A8579312	2012	1	1	1	A857	2	31	#NULL!	1	2	4	7	5127.93	6326.46	#NULL!	#NULL!	5834.09	7150.33	#NULL!	#NULL!	#NULL!	#NULL!	512	1	2	8	1	2	2	8	8	8	8	2	8	1	8	2	8	2	8	8	8	8	2	1	1
2015.01.07	A857931203	A8579312	2012	1	1	1	A857	2	5	64	1	2	1	#NULL!	5127.93	5191.12	#NULL!	#NULL!	4962.21	5917.39	#NULL!	#NULL!	#NULL!	#NULL!	512	1	2	8	2	8	1	2	8	8	8	8	8	8	8	8	8	8	8	8	8	8	8	8	8
2015.01.07	A857931204	A8579312	2012	1	1	1	A857	1	4	48	1	2	1	#NULL!	5127.93	3604.65	#NULL!	#NULL!	3705	4395.8	#NULL!	#NULL!	#NULL!	#NULL!	512	1	2	8	2	8	1	2	8	8	8	8	8	8	8	8	8	8	8	8	8	8	8	8	8
2015.01.07	A857932101	A8579321	2012	1	1	1	A857	2	65	#NULL!	1	1	3	7	5127.93	2482.74	5175.35	9195.74	2567.49	2647.16	11954	4911	9974.83	13521	512	1	2	8	2	8	2	8	2	8	8	2	8	1	8	2	8	1	2	2	2	2	2	1	1
2015.01.07	A858906002	A8589060	2012	1	1	2	A858	2	41	#NULL!	4	4	4	1	2995.64	2426.28	3933.74	#NULL!	3578.71	5319.6	#NULL!	7680.01	#NULL!	#NULL!	501	1	2	8	2	8	2	8	2	8	8	2	8	1	8	2	8	2	8	8	8	8	1	1	1
2015.01.07	A858906003	A8589060	2012	1	1	2	A858	2	14	#NULL!	4	4	1	#NULL!	2995.64	3941.93	#NULL!	6917.66	3105.68	4615.2	#NULL!	#NULL!	9833.14	#NULL!	501	1	2	8	2	8	2	8	8	8	8	8	8	1	8	2	8	2	8	8	8	8	1	1	1
2015.01.07	A858907202	A8589072	2012	1	1	2	A858	2	50	#NULL!	4	4	3	7	2995.64	3698.04	6429.74	#NULL!	3577.71	4375.22	#NULL!	6973.86	#NULL!	#NULL!	501	1	2	8	2	8	2	8	2	8	8	2	8	2	3	2	8	2	8	8	8	8	1	1	1
2015.01.07	A858907203	A8589072	2012	1	1	2	A858	2	21	#NULL!	4	4	3	7	2995.64	4835.47	#NULL!	17217.7	4683.74	7539.42	#NULL!	#NULL!	15663.8	#NULL!	501	1	2	8	2	8	2	8	8	8	8	2	8	1	8	2	8	2	8	8	8	8	1	1	1
2015.01.07	A858908701	A8589087	2012	1	1	2	A858	1	70	#NULL!	4	3	3	1	2995.64	1516.65	2281.29	36255.1	1487.14	1684.34	58303.9	2427.71	34418.1	66270	501	1	2	8	2	8	2	8	2	8	8	2	8	1	8	1	1	2	8	8	8	8	1	1	1
2015.01.07	A858908702	A8589087	2012	1	1	2	A858	2	69	#NULL!	4	3	2	3	2995.64	1450.37	1718.53	#NULL!	1499.88	1546.42	#NULL!	1747.23	#NULL!	#NULL!	501	1	2	8	2	8	2	8	1	2	1	1	2	2	3	2	8	2	8	8	8	8	1	1	1
2015.01.07	A858908703	A8589087	2012	1	1	2	A858	1	40	#NULL!	3	3	4	2	2995.64	4920.03	7545.97	#NULL!	5569.75	9722.37	#NULL!	11205.3	#NULL!	#NULL!	501	1	2	8	2	8	2	8	2	8	8	2	8	1	8	2	8	2	8	8	8	8	1	1	1
2015.01.07	A858908704	A8589087	2012	1	1	2	A858	2	32	#NULL!	3	3	#NULL!	#NULL!	2995.64	3695.79	#NULL!	14221.5	3408.16	4177.08	#NULL!	#NULL!	13105.9	#NULL!	501	1	2	8	2	8	2	8	8	8	8	2	8	1	8	2	8	2	8	8	8	8	1	1	1
2015.01.07	A858908705	A8589087	2012	1	1	2	A858	1	1	12	4	3	1	#NULL!	2995.64	2393.92	#NULL!	#NULL!	2050.47	2567.94	#NULL!	#NULL!	#NULL!	#NULL!	501	1	8	8	8	8	8	8	8	8	8	8	8	8	8	8	8	8	8	8	8	8	8	8	8
2015.01.07	A858910501	A8589105	2012	1	1	2	A858	1	53	#NULL!	4	4	4	1	2995.64	5742.01	5386.05	14286.1	5437.88	6109.12	16302.1	6646.28	25257.4	19568.8	501	1	2	8	2	8	2	8	2	8	8	2	8	1	8	2	8	2	8	8	8	8	1	1	1
2015.01.07	A858910502	A8589105	2012	1	1	2	A858	2	47	#NULL!	4	4	4	7	2995.64	3910.8	4448.38	#NULL!	3686.2	4093.31	#NULL!	4583.31	#NULL!	#NULL!	501	1	2	8	2	8	2	8	2	8	8	2	8	1	8	2	8	1	1	2	1	2	1	1	1
2015.01.07	A858910503	A8589105	2012	1	1	2	A858	2	15	#NULL!	4	4	2	7	2995.64	5945.1	#NULL!	#NULL!	3923.9	6091.33	#NULL!	#NULL!	#NULL!	#NULL!	501	1	2	8	2	8	2	8	8	8	8	8	8	1	8	2	8	2	8	8	8	8	1	1	1
2015.01.07	A858910504	A8589105	2012	1	1	2	A858	1	11	#NULL!	4	4	1	#NULL!	2995.64	2426.83	#NULL!	#NULL!	2058.43	3454.2	#NULL!	#NULL!	#NULL!	#NULL!	501	1	2	8	2	8	2	8	8	8	8	8	8	8	8	8	8	2	8	8	8	8	1	1	1
2015.01.07	A858911701	A8589117	2012	1	1	2	A858	1	44	#NULL!	2	3	4	1	2995.64	4920.03	7545.97	#NULL!	5569.75	14583.5	#NULL!	11205.3	#NULL!	#NULL!	501	1	2	8	2	8	2	8	2	8	8	2	8	1	8	2	8	2	8	8	8	8	1	1	1
2015.01.07	A858911702	A8589117	2012	1	1	2	A858	2	41	#NULL!	2	3	4	7	2995.64	2426.28	3933.74	#NULL!	2385.8	5319.6	#NULL!	3840.01	#NULL!	#NULL!	501	1	2	8	2	8	2	8	1	2	2	2	8	1	8	2	8	2	8	8	8	8	1	1	1
2015.01.07	A858913501	A8589135	2012	1	1	2	A858	2	77	#NULL!	2	1	1	7	2995.64	2086.05	#NULL!	#NULL!	1766.19	1819.49	#NULL!	#NULL!	#NULL!	#NULL!	501	1	2	8	2	8	2	8	2	8	8	2	8	1	8	1	1	2	8	8	8	8	1	1	1
2015.01.07	A858913802	A8589138	2012	1	1	2	A858	2	54	#NULL!	#NULL!	#NULL!	4	6	2995.64	4930.71	#NULL!	11588.3	4770.27	5833.62	#NULL!	#NULL!	10877.2	#NULL!	501	1	2	8	2	8	2	8	1	2	2	2	8	1	8	2	8	2	8	8	8	8	1	1	1
2015.01.07	A858915901	A8589159	2012	1	1	2	A858	1	61	#NULL!	4	4	4	3	2995.64	4618.8	2543.19	#NULL!	5435.84	3638.89	#NULL!	2837.31	#NULL!	#NULL!	501	1	1	2	2	8	2	8	2	8	8	2	8	1	8	1	1	2	8	8	8	8	1	1	1
2015.01.07	A858915902	A8589159	2012	1	1	2	A858	2	60	#NULL!	4	4	4	2	2995.64	3398.85	2044.22	#NULL!	3127.85	2769.63	#NULL!	2129.57	#NULL!	#NULL!	501	1	2	8	2	8	2	8	2	8	8	2	8	1	8	2	8	2	8	8	8	8	1	1	1
2015.01.07	A858917701	A8589177	2012	1	1	2	A858	1	49	#NULL!	4	4	4	2	2995.64	4442.16	5927.99	14009.1	6464.03	8304.65	17061.5	8150.67	14331.1	24889	501	1	2	8	2	8	2	8	2	8	8	2	8	1	8	2	8	2	8	8	8	8	1	1	1
2015.01.07	A858917702	A8589177	2012	1	1	2	A858	2	48	#NULL!	4	4	3	7	2995.64	3910.8	4448.38	#NULL!	3686.2	4093.31	#NULL!	4583.31	#NULL!	#NULL!	501	1	2	8	2	8	2	8	2	8	8	2	8	1	8	2	8	2	8	8	8	8	1	1	1
2015.01.07	A858917703	A8589177	2012	1	1	2	A858	2	18	#NULL!	4	4	3	2	2995.64	5945.1	#NULL!	18877.8	3923.9	6091.33	#NULL!	#NULL!	10512.2	#NULL!	501	1	2	8	2	8	2	8	8	8	8	8	8	1	8	2	8	2	8	8	8	8	1	1	1
2015.01.07	A858917704	A8589177	2012	1	1	2	A858	1	14	#NULL!	4	4	1	#NULL!	2995.64	3640.25	#NULL!	#NULL!	2287.15	3454.2	#NULL!	#NULL!	#NULL!	#NULL!	501	1	2	8	2	8	2	8	8	8	8	8	8	1	8	2	8	2	8	8	8	8	1	1	1
2015.01.07	A858918301	A8589183	2012	1	1	2	A858	1	68	#NULL!	1	1	4	1	2995.64	3889.34	4575.84	#NULL!	2058.6	5998.37	#NULL!	4701.52	#NULL!	#NULL!	501	1	2	8	2	8	2	8	2	8	8	2	8	1	8	2	8	2	8	8	8	8	1	1	1
2015.01.07	A858919501	A8589195	2012	1	1	2	A858	1	71	#NULL!	2	2	4	7	2995.64	1516.65	2281.29	#NULL!	1487.14	1684.34	#NULL!	2427.71	#NULL!	#NULL!	501	1	2	8	2	8	1	2	1	2	2	2	8	2	3	1	1	2	8	8	8	8	1	1	1
2015.01.07	A858919502	A8589195	2012	1	1	2	A858	2	65	#NULL!	2	2	3	7	2995.64	1450.37	1718.53	#NULL!	1499.88	1546.42	#NULL!	1747.23	#NULL!	#NULL!	501	1	2	8	2	8	2	8	1	2	2	1	2	2	3	1	1	1	2	1	1	2	1	1	1
2015.01.07	A858920402	A8589204	2012	1	1	2	A858	2	53	#NULL!	3	4	3	7	2995.64	2465.36	3214.87	#NULL!	2385.14	5833.62	#NULL!	3486.93	#NULL!	#NULL!	501	1	2	8	2	8	2	8	2	8	8	2	8	1	8	2	8	2	8	8	8	8	1	1	1
2015.01.07	A858922802	A8589228	2012	1	1	2	A858	2	41	#NULL!	4	4	4	1	2995.64	3639.42	5900.6	20749.3	3181.07	4433	26560	5760.01	13943.1	28435.4	501	1	2	8	2	8	2	8	2	8	8	2	8	1	8	2	8	2	8	8	8	8	1	1	1
2015.01.07	A858922803	A8589228	2012	1	1	2	A858	1	13	#NULL!	4	4	1	#NULL!	2995.64	3640.25	#NULL!	15106.1	3049.53	4317.75	#NULL!	#NULL!	9208.17	#NULL!	501	1	2	8	2	8	2	8	8	8	8	8	8	1	8	1	1	2	8	8	8	8	1	1	1
2015.01.07	A858922804	A8589228	2012	1	1	2	A858	2	10	#NULL!	4	4	1	#NULL!	2995.64	2627.95	#NULL!	#NULL!	1863.41	3846	#NULL!	#NULL!	#NULL!	#NULL!	501	1	2	8	1	2	2	8	8	8	8	8	8	8	8	8	8	2	8	8	8	8	1	1	1
2015.01.07	A858922805	A8589228	2012	1	1	2	A858	1	79	#NULL!	4	4	1	7	2995.64	2356.14	3421.94	#NULL!	1940.14	2105.42	#NULL!	3641.57	#NULL!	#NULL!	501	1	2	8	2	8	2	8	2	8	8	2	8	2	3	2	8	2	8	8	8	8	1	1	1
2015.01.07	A858923402	A8589234	2012	1	1	2	A858	2	46	#NULL!	3	4	4	7	2995.64	5866.2	8896.76	#NULL!	4914.94	8186.62	#NULL!	9166.62	#NULL!	#NULL!	501	1	2	8	2	8	2	8	2	8	8	2	8	2	3	2	8	2	8	8	8	8	1	1	1
2015.01.07	A858923403	A8589234	2012	1	1	2	A858	2	19	#NULL!	3	4	3	6	2995.64	5504.73	#NULL!	#NULL!	5231.87	12182.7	#NULL!	#NULL!	#NULL!	#NULL!	501	1	2	8	2	8	2	8	8	8	8	2	8	1	8	2	8	2	8	8	8	8	1	1	1
2015.01.07	A858927001	A8589270	2012	1	1	2	A858	1	45	#NULL!	3	4	4	1	2995.64	4442.16	5927.99	14009.1	#NULL!	#NULL!	17061.5	#NULL!	#NULL!	#NULL!	501	1	2	8	2	8	2	8	2	8	8	2	8	1	8	2	8	2	8	8	8	8	1	1	1
2015.01.07	A858927002	A8589270	2012	1	1	2	A858	2	43	#NULL!	3	4	3	7	2995.64	2426.28	3933.74	#NULL!	3181.07	4728.53	#NULL!	7680.01	#NULL!	#NULL!	501	1	2	8	2	8	2	8	2	8	8	2	8	1	8	2	8	2	8	8	8	8	1	1	1
2015.01.07	A858927003	A8589270	2012	1	1	2	A858	1	17	#NULL!	3	4	2	7	2995.64	8224.19	#NULL!	18786.4	5557.3	8210.66	#NULL!	#NULL!	25404.1	#NULL!	501	1	2	8	2	8	2	8	8	8	8	8	8	1	8	2	8	2	8	8	8	8	1	1	1
2015.01.07	A858927004	A8589270	2012	1	1	2	A858	1	14	#NULL!	3	4	1	#NULL!	2995.64	3640.25	#NULL!	#NULL!	3049.53	4605.6	#NULL!	#NULL!	#NULL!	#NULL!	501	1	2	8	2	8	2	8	8	8	8	8	8	1	8	2	8	1	1	1	1	2	1	1	1
2015.01.07	A858927301	A8589273	2012	1	1	2	A858	2	66	#NULL!	#NULL!	#NULL!	4	7	2995.64	1450.37	1718.53	3392.83	1499.88	1546.42	3721.37	1747.23	3036.23	4209.16	501	1	2	8	1	2	2	8	2	8	8	2	8	1	8	2	8	2	8	8	8	8	1	1	1
2015.01.07	A858929101	A8589291	2012	1	1	2	A858	1	41	#NULL!	3	4	4	2	2995.64	4920.03	7545.97	#NULL!	#NULL!	#NULL!	#NULL!	#NULL!	#NULL!	#NULL!	501	1	2	8	2	8	2	8	2	8	8	2	8	1	8	2	8	1	1	2	1	2	1	1	1
2015.01.07	A858929102	A8589291	2012	1	1	2	A858	2	37	#NULL!	4	4	4	7	2995.64	2574.28	#NULL!	13737.2	5102.79	4793.59	#NULL!	#NULL!	10973.5	#NULL!	501	1	2	8	2	8	2	8	8	8	8	2	8	1	8	2	8	2	8	8	8	8	1	1	1
2015.01.07	A858929103	A8589291	2012	1	1	2	A858	1	6	76	4	4	1	#NULL!	2995.64	2309.66	#NULL!	#NULL!	1991.83	3593.49	#NULL!	#NULL!	#NULL!	#NULL!	501	1	2	8	2	8	1	2	8	8	8	8	8	8	8	8	8	2	8	8	8	8	1	1	1
2015.01.07	A858929104	A8589291	2012	1	1	2	A858	1	9	#NULL!	4	4	1	#NULL!	2995.64	2309.66	#NULL!	#NULL!	1991.83	3593.49	#NULL!	#NULL!	#NULL!	#NULL!	501	1	2	8	1	1	2	8	8	8	8	8	8	8	8	8	8	1	2	2	2	1	1	2	1
2015.01.07	A858932102	A8589321	2012	1	1	2	A858	2	34	#NULL!	3	4	4	7	2995.64	7391.58	#NULL!	#NULL!	6816.33	6265.63	#NULL!	#NULL!	#NULL!	#NULL!	501	1	2	8	2	8	2	8	8	8	8	2	8	1	8	1	1	2	8	8	8	8	1	1	1
2015.01.07	A858932103	A8589321	2012	1	1	2	A858	2	2	29	4	4	1	#NULL!	2995.64	3686.52	#NULL!	#NULL!	2795.19	5156.69	#NULL!	#NULL!	#NULL!	#NULL!	501	1	8	8	8	8	8	8	8	8	8	8	8	8	8	8	8	8	8	8	8	8	8	8	8
2015.01.07	A859909901	A8599099	2012	1	1	2	A859	1	50	#NULL!	1	2	3	5	2394.57	4589.88	5421.55	#NULL!	9236.91	10377.1	#NULL!	13875.7	#NULL!	#NULL!	501	1	2	8	2	8	2	8	2	8	8	2	8	1	8	1	2	2	8	8	8	8	1	1	1
2015.01.07	A859909902	A8599099	2012	1	1	2	A859	2	46	#NULL!	1	2	3	3	2394.57	3126.11	4477.7	13402.5	#NULL!	#NULL!	12391.6	#NULL!	#NULL!	#NULL!	501	1	2	8	2	8	2	8	2	8	8	2	8	1	8	2	8	2	8	8	8	8	1	1	1
2015.01.07	A859909903	A8599099	2012	1	1	2	A859	2	21	#NULL!	1	2	4	7	2394.57	2576.83	#NULL!	#NULL!	5303.93	8537.75	#NULL!	#NULL!	#NULL!	#NULL!	501	1	2	8	1	2	1	2	8	8	8	2	8	2	3	2	8	2	8	8	8	8	1	1	1
2015.01.07	A859909904	A8599099	2012	1	1	2	A859	1	18	#NULL!	1	2	3	6	2394.57	6898.66	#NULL!	7879.25	#NULL!	#NULL!	#NULL!	#NULL!	#NULL!	#NULL!	501	1	1	2	2	8	2	8	8	8	8	8	8	1	8	2	8	2	8	8	8	8	1	1	1
2015.01.07	A859911101	A8599111	2012	1	1	2	A859	1	45	#NULL!	3	3	3	5	2394.57	7101.7	11934.1	8653.14	5489.97	23463.9	11449.3	17016.5	24042.6	20877.5	501	1	2	8	2	8	2	8	2	8	8	2	8	1	8	2	8	2	8	8	8	8	1	1	1
2015.01.07	A859912601	A8599126	2012	1	1	2	A859	1	37	#NULL!	2	3	3	5	2394.57	3165.76	#NULL!	4347.74	3290.11	5500.46	#NULL!	#NULL!	5703.05	#NULL!	501	1	2	8	2	8	2	8	8	8	8	2	8	1	8	2	8	2	8	8	8	8	1	1	1
2015.01.07	A859912602	A8599126	2012	1	1	2	A859	2	34	#NULL!	2	3	3	7	2394.57	2954.24	#NULL!	4392.17	2894.59	3547.65	#NULL!	#NULL!	5496.77	#NULL!	501	1	2	8	2	8	2	8	8	8	8	2	8	1	8	2	8	1	1	1	1	2	1	1	1
2015.01.07	A859912603	A8599126	2012	1	1	2	A859	1	3	38	2	3	1	#NULL!	2394.57	2008.08	#NULL!	#NULL!	1547.99	2180.98	#NULL!	#NULL!	#NULL!	#NULL!	501	1	8	8	8	8	8	8	8	8	8	8	8	8	8	8	8	8	8	8	8	8	8	8	8
2015.01.07	A859912901	A8599129	2012	1	1	2	A859	2	63	#NULL!	1	1	2	7	2394.57	1811.25	2057.69	#NULL!	1771.01	1568.19	#NULL!	2223	#NULL!	#NULL!	501	1	2	8	2	8	2	8	2	8	8	2	8	2	3	2	8	2	8	8	8	8	1	1	1
2015.01.07	A859912902	A8599129	2012	1	1	2	A859	1	69	#NULL!	1	1	1	7	2394.57	1554.48	2303	4060.47	1748.39	1698.16	6340.53	2453.89	5000.33	9333.95	501	1	2	8	2	8	2	8	2	8	8	2	8	1	8	2	8	2	8	8	8	8	1	1	1
2015.01.07	A859914403	A8599144	2012	1	1	2	A859	2	21	#NULL!	1	1	3	7	2394.57	7730.48	#NULL!	#NULL!	10607.9	17075.5	#NULL!	#NULL!	#NULL!	#NULL!	501	1	2	8	1	2	2	8	8	8	8	2	8	1	8	2	8	1	2	2	2	2	1	1	1
2015.01.07	A859914405	A8599144	2012	1	1	2	A859	2	17	#NULL!	1	1	2	7	2394.57	4986.91	#NULL!	7917.6	#NULL!	#NULL!	#NULL!	#NULL!	#NULL!	#NULL!	501	1	2	8	2	8	1	2	8	8	8	8	8	1	8	1	2	2	8	8	8	8	1	1	1
2015.01.07	A859916201	A8599162	2012	1	1	2	A859	1	36	#NULL!	1	2	3	3	2394.57	3165.76	#NULL!	8695.48	3290.11	5500.46	#NULL!	#NULL!	11406.1	#NULL!	501	1	2	8	2	8	2	8	8	8	8	2	8	1	8	2	8	2	8	8	8	8	1	1	1
2015.01.07	A859916202	A8599162	2012	1	1	2	A859	2	31	#NULL!	1	2	3	7	2394.57	2954.24	#NULL!	#NULL!	2894.59	3547.65	#NULL!	#NULL!	#NULL!	#NULL!	501	1	1	2	2	8	2	8	8	8	8	2	8	1	8	2	8	1	1	2	2	1	2	2	1
2015.01.07	A859916203	A8599162	2012	1	1	2	A859	1	1	12	2	2	1	#NULL!	2394.57	2008.08	#NULL!	#NULL!	1547.99	2180.98	#NULL!	#NULL!	#NULL!	#NULL!	501	1	8	8	8	8	8	8	8	8	8	8	8	8	8	8	8	8	8	8	8	8	8	8	8
2015.01.07	A859917102	A8599171	2012	1	1	2	A859	2	27	#NULL!	3	3	3	7	2394.57	2775.63	#NULL!	3239.08	3045.23	4088.23	#NULL!	#NULL!	4299.06	#NULL!	501	1	2	8	2	8	2	8	8	8	8	2	8	1	8	2	8	1	2	1	1	2	1	1	1
2015.01.07	A859917103	A8599171	2012	1	1	2	A859	1	1	13	4	3	1	#NULL!	2394.57	2008.08	#NULL!	#NULL!	1547.99	2180.98	#NULL!	#NULL!	#NULL!	#NULL!	501	1	8	8	8	8	8	8	8	8	8	8	8	8	8	8	8	8	8	8	8	8	8	8	8
2015.01.07	A859918901	A8599189	2012	1	1	2	A859	1	78	#NULL!	3	2	3	7	2394.57	1255.59	#NULL!	#NULL!	1235.84	1430.53	#NULL!	#NULL!	#NULL!	#NULL!	501	1	2	8	2	8	2	8	2	8	8	2	8	1	8	2	8	2	8	8	8	8	1	1	1
2015.01.07	A859919201	A8599192	2012	1	1	2	A859	1	50	#NULL!	4	4	4	2	2394.57	6884.83	#NULL!	13236.3	6927.68	7782.82	#NULL!	#NULL!	15889.9	#NULL!	501	1	2	8	2	8	2	8	2	8	8	2	8	2	3	2	8	2	8	8	8	8	1	1	1
2015.01.07	A859919202	A8599192	2012	1	1	2	A859	2	49	#NULL!	4	4	3	6	2394.57	4689.16	8955.4	#NULL!	4696.1	5214.74	#NULL!	9568.78	#NULL!	#NULL!	501	1	2	8	1	2	2	8	2	8	8	2	8	1	8	2	8	1	1	2	2	1	1	1	1
2015.01.07	A859920101	A8599201	2012	1	1	2	A859	1	68	#NULL!	#NULL!	#NULL!	#NULL!	#NULL!	2394.57	2331.71	2303	#NULL!	#NULL!	#NULL!	#NULL!	#NULL!	#NULL!	#NULL!	501	1	2	8	2	8	1	2	2	8	8	2	8	1	8	2	8	2	8	8	8	8	1	1	1
2015.01.07	A859920102	A8599201	2012	1	1	2	A859	2	61	#NULL!	#NULL!	#NULL!	2	7	2394.57	2716.88	2057.69	8354.71	#NULL!	#NULL!	7239.15	#NULL!	#NULL!	#NULL!	501	1	2	8	1	2	2	8	2	8	8	1	2	2	3	2	8	1	1	1	1	1	2	1	1
2015.01.07	A859922202	A8599222	2012	1	1	2	A859	2	65	#NULL!	3	2	2	7	2394.57	2318.71	3459.71	#NULL!	2547.73	2626.78	#NULL!	3647.78	#NULL!	#NULL!	501	1	2	8	2	8	1	2	2	8	8	2	8	1	8	2	8	2	8	8	8	8	1	1	1
2015.01.07	A859922501	A8599225	2012	1	1	2	A859	1	65	#NULL!	2	2	1	6	2394.57	3108.95	4606	#NULL!	3496.78	3396.32	#NULL!	4907.79	#NULL!	#NULL!	501	1	2	8	2	8	2	8	2	8	8	2	8	1	8	1	2	2	8	8	8	8	1	1	1
2015.01.07	A859924301	A8599243	2012	1	1	2	A859	1	75	#NULL!	3	2	#NULL!	#NULL!	2394.57	1255.59	4592.66	#NULL!	1235.84	1430.53	#NULL!	5068.44	#NULL!	#NULL!	501	1	2	8	2	8	2	8	2	8	8	2	8	1	8	2	8	2	8	8	8	8	1	1	1
2015.01.07	A859924302	A8599243	2012	1	1	2	A859	2	70	#NULL!	3	2	1	7	2394.57	1722.85	#NULL!	#NULL!	1662.98	1545.31	#NULL!	#NULL!	#NULL!	#NULL!	501	1	1	2	2	8	1	2	2	8	8	2	8	1	8	2	8	1	1	1	1	2	2	1	1
2015.01.07	A859925802	A8599258	2012	1	1	2	A859	2	45	#NULL!	4	4	3	3	2394.57	9378.32	8955.4	13402.5	12522.9	13906	12391.6	9568.78	19914.3	18572.3	501	1	2	8	2	8	2	8	2	8	8	1	2	2	3	2	8	2	8	8	8	8	1	1	1
2015.01.07	A859927601	A8599276	2012	1	1	2	A859	2	51	#NULL!	3	4	3	7	2394.57	5912.06	3236.06	10736.8	6077.17	7431.84	4874.92	3639.91	13686.2	7496.59	501	1	2	8	2	8	2	8	2	8	8	2	8	1	8	2	8	2	8	8	8	8	1	1	1
2015.01.07	A859932102	A8599321	2012	1	1	2	A859	2	45	#NULL!	1	2	#NULL!	#NULL!	2394.57	5210.18	#NULL!	#NULL!	3913.42	5794.16	#NULL!	#NULL!	#NULL!	#NULL!	501	1	2	8	2	8	2	8	2	8	8	2	8	1	8	2	8	2	8	8	8	8	2	1	1
2015.01.07	A859932104	A8599321	2012	1	1	2	A859	1	19	#NULL!	2	2	3	3	2394.57	6763.4	#NULL!	14325.9	4424.89	8716.77	#NULL!	#NULL!	13318.5	#NULL!	501	1	2	8	1	2	1	2	8	8	8	2	8	1	8	2	8	1	1	1	1	2	1	1	1
2015.01.07	A859932105	A8599321	2012	1	1	2	A859	2	23	#NULL!	2	2	3	7	2394.57	4294.71	#NULL!	8862.53	3314.96	7114.79	#NULL!	#NULL!	10949.3	#NULL!	501	1	2	8	2	8	2	8	8	8	8	2	8	1	8	2	8	2	8	8	8	8	1	1	1
2015.01.07	A860904201	A8609042	2012	1	1	1	A860	2	44	#NULL!	2	3	4	7	12610.2	10213.5	19367.4	#NULL!	17575.4	20683.3	#NULL!	27579.8	#NULL!	#NULL!	512	1	2	8	2	8	2	8	2	8	8	2	8	1	8	2	8	1	1	2	2	1	2	2	1
2015.01.07	A860904202	A8609042	2012	1	1	1	A860	1	42	#NULL!	2	3	4	1	12610.2	18340.6	28818.3	42949.1	#NULL!	#NULL!	49380.4	#NULL!	#NULL!	#NULL!	512	1	2	8	2	8	1	2	2	8	8	2	8	1	8	1	1	2	8	8	8	8	1	1	1
2015.01.07	A860904203	A8609042	2012	1	1	1	A860	1	16	#NULL!	2	3	2	7	12610.2	18117	#NULL!	58702.4	19609.2	21930	#NULL!	#NULL!	66828.7	#NULL!	512	1	2	8	1	2	2	8	8	8	8	8	8	1	8	2	8	2	8	8	8	8	1	1	1
2015.01.07	A860904204	A8609042	2012	1	1	1	A860	1	11	#NULL!	2	3	1	#NULL!	12610.2	6969.82	#NULL!	#NULL!	7094.13	20411.1	#NULL!	#NULL!	#NULL!	#NULL!	512	1	2	8	2	8	2	8	8	8	8	8	8	8	8	8	8	2	8	8	8	8	1	1	1
2015.01.07	A860908401	A8609084	2012	1	1	1	A860	2	41	#NULL!	1	1	4	7	12610.2	10213.5	19367.4	18527.5	11716.9	17416.7	20341.3	20586.4	18260.2	27222	512	1	2	8	2	8	2	8	1	1	1	2	8	1	8	2	8	2	8	8	8	8	1	1	1
2015.01.07	A860908402	A8609084	2012	1	1	1	A860	1	7	#NULL!	1	1	1	#NULL!	12610.2	6633.31	#NULL!	#NULL!	6864.62	13236	#NULL!	#NULL!	#NULL!	#NULL!	512	1	2	8	2	8	2	8	8	8	8	8	8	8	8	8	8	2	8	8	8	8	1	1	1
2015.01.07	A860911701	A8609117	2012	1	1	1	A860	1	37	#NULL!	3	3	3	5	12610.2	16671.4	#NULL!	#NULL!	19024.9	22443.8	#NULL!	#NULL!	#NULL!	#NULL!	512	1	2	8	1	2	2	8	8	8	8	1	1	1	8	2	8	1	1	2	1	2	1	1	1
2015.01.07	A860911702	A8609117	2012	1	1	1	A860	2	36	#NULL!	3	3	3	7	12610.2	10836.4	#NULL!	36798.8	12530.1	17656.3	#NULL!	#NULL!	35928	#NULL!	512	1	2	8	2	8	2	8	8	8	8	2	8	1	8	1	1	1	1	1	1	2	1	1	1
2015.01.07	A860911703	A8609117	2012	1	1	1	A860	2	1	13	3	3	1	#NULL!	12610.2	10587.6	#NULL!	#NULL!	9633.28	16883.3	#NULL!	#NULL!	#NULL!	#NULL!	512	1	8	8	8	8	8	8	8	8	8	8	8	8	8	8	8	8	8	8	8	8	8	8	8
2015.01.07	A860912601	A8609126	2012	1	1	1	A860	1	71	#NULL!	4	4	4	5	12610.2	6384.33	11231.7	#NULL!	7303.48	8271.94	#NULL!	13015	#NULL!	#NULL!	512	1	2	8	2	8	1	2	1	1	2	2	8	3	3	1	1	2	8	8	8	8	1	1	1
2015.01.07	A860912602	A8609126	2012	1	1	1	A860	2	67	#NULL!	4	4	3	1	12610.2	6105.34	8461.01	18177.2	7366.05	7594.61	17100.4	9366.98	19881.6	24177.3	512	1	1	2	2	8	2	8	2	8	8	2	8	1	8	2	8	2	8	8	8	8	1	1	1
2015.01.07	A860912603	A8609126	2012	1	1	1	A860	2	34	#NULL!	4	4	4	1	12610.2	15557.5	#NULL!	38096.1	16737.8	20300.2	#NULL!	#NULL!	42909.4	#NULL!	512	1	2	8	1	2	2	8	8	8	8	2	8	1	8	1	1	1	1	1	1	2	1	2	1
2015.01.07	A860912604	A8609126	2012	1	1	1	A860	1	35	#NULL!	4	4	4	2	12610.2	16671.4	#NULL!	#NULL!	19024.9	22443.8	#NULL!	#NULL!	#NULL!	#NULL!	512	1	2	8	2	8	2	8	8	8	8	2	8	1	8	1	1	2	8	8	8	8	1	1	1
2015.01.07	A860912605	A8609126	2012	1	1	1	A860	1	1	17	4	4	1	#NULL!	12610.2	6875.3	#NULL!	#NULL!	7066.71	12611.4	#NULL!	#NULL!	#NULL!	#NULL!	512	1	8	8	8	8	8	8	8	8	8	8	8	8	8	8	8	8	8	8	8	8	8	8	8
2015.01.07	A860913201	A8609132	2012	1	1	1	A860	2	55	#NULL!	4	4	2	3	12610.2	17774.3	#NULL!	#NULL!	#NULL!	#NULL!	#NULL!	#NULL!	#NULL!	#NULL!	512	1	2	8	1	1	2	8	2	8	8	2	8	1	8	2	8	1	1	2	1	1	2	1	1
2015.01.07	A860913501	A8609135	2012	1	1	1	A860	1	26	#NULL!	2	3	3	7	12610.2	19885.5	#NULL!	#NULL!	21406.4	26219.3	#NULL!	#NULL!	#NULL!	#NULL!	512	1	2	8	2	8	2	8	8	8	8	2	8	1	8	2	8	2	8	8	8	8	1	1	1
2015.01.07	A860913502	A8609135	2012	1	1	1	A860	2	29	#NULL!	2	3	4	1	12610.2	14616.9	#NULL!	28094.6	17608.8	20971.9	#NULL!	#NULL!	33559.7	#NULL!	512	1	2	8	2	8	2	8	8	8	8	1	1	1	8	2	8	1	1	1	1	2	1	1	1
2015.01.07	A860917401	A8609174	2012	1	1	1	A860	1	29	#NULL!	1	2	3	2	12610.2	19885.5	#NULL!	#NULL!	#NULL!	#NULL!	#NULL!	#NULL!	#NULL!	#NULL!	512	1	2	8	2	8	2	8	8	8	8	2	8	1	8	2	8	1	1	1	1	2	1	1	1
2015.01.07	A860917404	A8609174	2012	1	1	1	A860	1	25	#NULL!	1	2	3	7	12610.2	19885.5	#NULL!	#NULL!	21406.4	26219.3	#NULL!	#NULL!	#NULL!	#NULL!	512	1	1	2	2	8	2	8	8	8	8	2	8	1	8	2	8	1	1	1	1	1	2	2	1
2015.01.07	A860918901	A8609189	2012	1	1	1	A860	1	49	#NULL!	3	4	4	1	12610.2	17631.9	27061.3	#NULL!	19982.2	23463.9	#NULL!	30758.8	#NULL!	#NULL!	512	1	2	8	2	8	2	8	2	8	8	2	8	1	8	2	8	2	8	8	8	8	1	1	1
2015.01.07	A860918902	A8609189	2012	1	1	1	A860	2	48	#NULL!	3	4	3	7	12610.2	16462.5	21901.2	#NULL!	18103.3	20102.6	#NULL!	24571.3	#NULL!	#NULL!	512	1	2	8	2	8	2	8	2	8	8	1	2	2	3	1	1	2	8	8	8	8	2	1	1
2015.01.07	A860918903	A8609189	2012	1	1	1	A860	1	19	#NULL!	3	4	3	7	12610.2	18117	#NULL!	58702.4	19609.2	21930	#NULL!	#NULL!	66828.7	#NULL!	512	1	2	8	2	8	2	8	8	8	8	2	8	1	8	1	1	2	8	8	8	8	1	1	1
2015.01.07	A860918904	A8609189	2012	1	1	1	A860	1	12	#NULL!	3	4	1	#NULL!	12610.2	8363.79	#NULL!	#NULL!	11232.4	16963.9	#NULL!	#NULL!	#NULL!	#NULL!	512	1	1	1	1	1	1	2	8	8	8	8	8	1	8	2	8	2	8	8	8	8	2	2	1
2015.01.07	A860921301	A8609213	2012	1	1	1	A860	1	49	#NULL!	2	3	4	5	12610.2	17631.9	27061.3	37527.2	#NULL!	#NULL!	19600.1	#NULL!	#NULL!	#NULL!	512	1	2	8	2	8	2	8	2	8	8	2	8	1	8	1	2	2	8	8	8	8	1	1	1
2015.01.07	A860921302	A8609213	2012	1	1	1	A860	2	38	#NULL!	2	3	3	7	12610.2	10836.4	#NULL!	#NULL!	19181.1	20620	#NULL!	#NULL!	#NULL!	#NULL!	512	1	2	8	1	2	1	2	8	8	8	2	8	1	8	1	1	1	1	1	1	2	1	1	1
2015.01.07	A860921303	A8609213	2012	1	1	1	A860	1	6	76	2	3	1	#NULL!	12610.2	6633.31	#NULL!	#NULL!	6864.62	19853.9	#NULL!	#NULL!	#NULL!	#NULL!	512	1	2	8	1	1	1	2	8	8	8	8	8	8	8	8	8	1	1	2	2	1	1	2	1
2015.01.07	A860921601	A8609216	2012	1	1	1	A860	1	60	#NULL!	3	3	3	7	12610.2	18109.9	25042.3	19699.7	17797.3	20505.6	20538.5	27225.1	22000.1	31200.6	512	1	2	8	2	8	2	8	2	8	8	1	2	1	8	2	8	2	8	8	8	8	1	2	1
2015.01.07	A860924301	A8609243	2012	1	1	1	A860	2	50	#NULL!	3	3	4	3	12610.2	10377.9	15828.1	15521.3	11713.6	14324.7	16690.8	18693.5	17806.4	25666.9	512	1	2	8	2	8	2	8	1	2	2	2	8	1	8	2	8	2	8	8	8	8	1	1	1
2015.01.07	A860924302	A8609243	2012	1	1	1	A860	2	14	#NULL!	3	3	1	#NULL!	12610.2	9056.93	#NULL!	31787.8	10168.2	15110.4	#NULL!	#NULL!	10731.4	#NULL!	512	1	2	8	2	8	2	8	8	8	8	8	8	1	8	2	8	2	8	8	8	8	1	1	1
2015.01.07	A860929401	A8609294	2012	1	1	1	A860	1	30	#NULL!	3	4	3	3	12610.2	19788.9	#NULL!	54366.3	21278.4	24829.6	#NULL!	#NULL!	72376.6	#NULL!	512	1	1	2	2	8	2	8	8	8	8	1	1	1	8	1	1	2	8	8	8	8	1	1	1
2015.01.07	A860929402	A8609294	2012	1	1	1	A860	2	33	#NULL!	4	4	3	2	12610.2	15557.5	#NULL!	#NULL!	16737.8	20300.2	#NULL!	#NULL!	#NULL!	#NULL!	512	1	2	8	2	8	2	8	8	8	8	2	8	1	8	2	8	2	8	8	8	8	1	1	1
2015.01.07	A860931203	A8609312	2012	1	1	1	A860	2	20	#NULL!	4	4	3	7	12610.2	18624.2	#NULL!	46122.4	18984.1	21079.1	#NULL!	#NULL!	65754.3	#NULL!	512	1	2	8	2	8	1	2	8	8	8	2	8	1	8	1	2	1	1	1	1	2	2	2	1
2015.01.07	A860931204	A8609312	2012	1	1	1	A860	1	13	#NULL!	4	4	1	#NULL!	12610.2	8363.79	#NULL!	#NULL!	14976.5	20411.1	#NULL!	#NULL!	#NULL!	#NULL!	512	1	2	8	2	8	2	8	8	8	8	8	8	1	8	1	1	2	8	8	8	8	1	1	1
2015.01.07	A860931801	A8609318	2012	1	1	1	A860	2	39	#NULL!	1	2	4	3	12610.2	10836.4	#NULL!	#NULL!	#NULL!	#NULL!	#NULL!	#NULL!	#NULL!	#NULL!	512	1	2	8	2	8	2	8	8	8	8	2	8	1	8	2	8	2	8	8	8	8	1	1	1
2015.01.07	A860931802	A8609318	2012	1	1	1	A860	1	14	#NULL!	1	2	1	#NULL!	12610.2	8363.79	#NULL!	#NULL!	#NULL!	#NULL!	#NULL!	#NULL!	#NULL!	#NULL!	512	1	1	2	2	8	1	2	8	8	8	8	8	2	3	2	8	2	8	8	8	8	1	1	1
2015.01.07	A860931803	A8609318	2012	1	1	1	A860	1	13	#NULL!	1	2	1	#NULL!	12610.2	8363.79	#NULL!	#NULL!	#NULL!	#NULL!	#NULL!	#NULL!	#NULL!	#NULL!	512	1	2	8	2	8	2	8	8	8	8	8	8	1	8	1	1	2	8	8	8	8	1	1	1
2015.01.07	A861911102	A8619111	2012	1	1	1	A861	2	51	#NULL!	#NULL!	#NULL!	4	7	7686.64	12651.9	#NULL!	#NULL!	#NULL!	#NULL!	#NULL!	#NULL!	#NULL!	#NULL!	512	1	1	2	1	2	2	8	1	3	2	1	1	1	8	2	8	1	1	2	1	1	1	1	1
2015.01.07	A861911701	A8619117	2012	1	1	1	A861	1	75	#NULL!	4	2	2	7	7686.64	4030.48	#NULL!	#NULL!	4267.1	4939.34	#NULL!	#NULL!	#NULL!	#NULL!	512	1	2	8	2	8	2	8	1	3	2	2	8	2	3	1	1	2	8	8	8	8	1	1	1
2015.01.07	A861913801	A8619138	2012	1	1	1	A861	2	47	#NULL!	4	4	1	5	7686.64	10034.9	12682.6	#NULL!	10809.8	12003.7	#NULL!	13304.8	#NULL!	#NULL!	512	1	2	8	2	8	2	8	2	8	8	2	8	1	8	2	8	1	2	1	1	2	1	1	1
2015.01.07	A861913802	A8619138	2012	1	1	1	A861	2	23	#NULL!	4	4	4	2	7686.64	8271.69	#NULL!	23562.5	9156.73	14739.6	#NULL!	#NULL!	22329.1	#NULL!	512	1	2	8	1	2	2	8	8	8	8	2	8	1	8	2	8	1	1	2	1	2	1	2	1
2015.01.07	A861913803	A8619138	2012	1	1	1	A861	2	18	#NULL!	4	4	3	3	7686.64	7533.24	#NULL!	15947.1	11506.9	17862.9	#NULL!	#NULL!	22478.1	#NULL!	512	1	2	8	2	8	2	8	8	8	8	8	8	2	3	2	8	2	8	8	8	8	1	2	1
2015.01.07	A861915301	A8619153	2012	1	1	1	A861	1	51	#NULL!	3	4	#NULL!	#NULL!	7686.64	14733.7	15355.9	14662.9	15946.6	17915	22309.5	19293.4	18002.5	22316.7	512	1	2	8	2	8	1	2	2	8	8	2	8	2	3	2	8	2	8	8	8	8	1	2	1
2015.01.07	A861915302	A8619153	2012	1	1	1	A861	2	20	#NULL!	3	4	4	1	7686.64	8271.69	#NULL!	11781.2	9156.73	14739.6	#NULL!	#NULL!	14886.1	#NULL!	512	1	2	8	2	8	2	8	8	8	8	1	1	1	8	1	1	1	2	1	1	1	1	1	1
2015.01.07	A861915601	A8619156	2012	1	1	1	A861	2	46	#NULL!	1	1	3	7	7686.64	10034.9	12682.6	#NULL!	10809.8	12003.7	#NULL!	13304.8	#NULL!	#NULL!	512	1	2	8	2	8	2	8	1	2	2	2	8	1	8	1	1	2	8	8	8	8	1	1	1
2015.01.07	A861915602	A8619156	2012	1	1	1	A861	2	14	#NULL!	1	1	1	#NULL!	7686.64	4994.95	#NULL!	#NULL!	6071.63	9022.74	#NULL!	#NULL!	#NULL!	#NULL!	512	1	2	8	2	8	2	8	8	8	8	8	8	1	8	2	8	2	8	8	8	8	1	1	1
2015.01.07	A861917702	A8619177	2012	1	1	1	A861	2	36	#NULL!	2	3	#NULL!	#NULL!	7686.64	6605.45	#NULL!	#NULL!	14964	20620	#NULL!	#NULL!	#NULL!	#NULL!	512	1	2	8	2	8	2	8	8	8	8	1	1	1	8	2	8	2	8	8	8	8	1	1	1
2015.01.07	A861918301	A8619183	2012	1	1	1	A861	1	54	#NULL!	4	4	3	5	7686.64	14733.7	15355.9	#NULL!	15946.6	17915	#NULL!	19293.4	#NULL!	#NULL!	512	1	2	8	2	8	2	8	1	3	2	2	8	1	8	2	8	2	8	8	8	8	1	1	1
2015.01.07	A861918302	A8619183	2012	1	1	1	A861	2	43	#NULL!	4	4	3	3	7686.64	6225.71	11215.3	42593.2	6996.39	10399.9	48463.3	11147.1	39752.4	43237.8	512	1	1	2	1	2	2	8	2	8	8	1	1	2	3	2	8	1	2	2	2	2	1	1	1
2015.01.07	A861918303	A8619183	2012	1	1	1	A861	2	19	#NULL!	4	4	3	3	7686.64	9416.55	#NULL!	#NULL!	11506.9	17862.9	#NULL!	#NULL!	#NULL!	#NULL!	512	1	2	8	2	8	1	2	8	8	8	2	8	1	8	2	8	2	8	8	8	8	1	1	1
2015.01.07	A861918304	A8619183	2012	1	1	1	A861	1	15	#NULL!	4	4	2	7	7686.64	10421.1	#NULL!	31739.8	12222.6	18058.4	#NULL!	#NULL!	45267.8	#NULL!	512	1	2	8	2	8	2	8	8	8	8	8	8	1	8	2	8	2	8	8	8	8	1	1	1
2015.01.07	A861918305	A8619183	2012	1	1	1	A861	2	12	#NULL!	4	4	1	#NULL!	7686.64	4994.95	#NULL!	#NULL!	6071.63	9022.74	#NULL!	#NULL!	#NULL!	#NULL!	512	1	1	2	2	8	2	8	8	8	8	8	8	1	8	2	8	1	1	1	1	2	1	1	1
2015.01.07	A861919501	A8619195	2012	1	1	1	A861	1	41	#NULL!	4	4	4	3	7686.64	12624.5	21513.9	#NULL!	16333.3	24074.7	#NULL!	31802.5	#NULL!	#NULL!	512	1	2	8	2	8	2	8	2	8	8	2	8	1	8	2	8	2	8	8	8	8	1	1	1
2015.01.07	A861919502	A8619195	2012	1	1	1	A861	2	37	#NULL!	4	4	3	6	7686.64	6605.45	#NULL!	28199.1	7481.98	10542.9	#NULL!	#NULL!	31286.1	#NULL!	512	1	2	8	2	8	2	8	8	8	8	2	8	1	8	2	8	1	1	2	2	1	2	1	1
2015.01.07	A861919503	A8619195	2012	1	1	1	A861	1	13	#NULL!	4	4	1	#NULL!	7686.64	4612.68	#NULL!	25521.9	6707.07	10129.5	#NULL!	#NULL!	21002.4	#NULL!	512	1	1	2	1	2	2	8	8	8	8	8	8	1	8	2	8	2	8	8	8	8	2	1	1
2015.01.07	A861919504	A8619195	2012	1	1	1	A861	2	11	#NULL!	4	4	1	#NULL!	7686.64	7492.43	#NULL!	#NULL!	4250.14	9022.74	#NULL!	#NULL!	#NULL!	#NULL!	512	1	2	8	2	8	2	8	8	8	8	8	8	8	8	8	8	2	8	8	8	8	1	1	1
2015.01.07	A861920101	A8619201	2012	1	1	1	A861	1	37	#NULL!	1	1	3	7	7686.64	10162.2	#NULL!	14449	#NULL!	#NULL!	#NULL!	#NULL!	#NULL!	#NULL!	512	1	2	8	2	8	2	8	8	8	8	2	8	2	3	1	2	2	8	8	8	8	1	2	1
2015.01.07	A861921601	A8619216	2012	1	1	1	A861	1	42	#NULL!	1	1	4	1	7686.64	12624.5	21513.9	#NULL!	16333.3	24074.7	#NULL!	31802.5	#NULL!	#NULL!	512	1	1	1	1	2	1	2	2	8	8	2	8	1	8	2	8	1	2	2	2	2	1	1	1
2015.01.07	A861925201	A8619252	2012	1	1	1	A861	1	46	#NULL!	2	3	3	5	7686.64	11398.3	16901	28757.2	18955.8	23463.9	23348.7	23660.5	61288	28383.9	512	1	2	8	2	8	2	8	2	8	8	2	8	1	8	2	8	2	8	8	8	8	1	1	1
2015.01.07	A861925202	A8619252	2012	1	1	1	A861	2	37	#NULL!	2	3	3	3	7686.64	6605.45	#NULL!	#NULL!	7481.98	10542.9	#NULL!	#NULL!	#NULL!	#NULL!	512	1	2	8	2	8	2	8	8	8	8	1	2	1	8	2	8	2	8	8	8	8	1	1	1
2015.01.07	A861925203	A8619252	2012	1	1	1	A861	2	15	#NULL!	2	3	2	7	7686.64	7533.24	#NULL!	#NULL!	11506.9	17862.9	#NULL!	#NULL!	#NULL!	#NULL!	512	1	2	8	1	1	2	8	8	8	8	8	8	1	8	1	1	1	1	2	2	1	2	2	1
2015.01.07	A861925204	A8619252	2012	1	1	1	A861	2	6	82	2	3	1	#NULL!	7686.64	9829.09	#NULL!	#NULL!	6263.78	10137.2	#NULL!	#NULL!	#NULL!	#NULL!	512	1	2	8	2	8	2	8	8	8	8	8	8	8	8	8	8	2	8	8	8	8	1	1	1
2015.01.07	A861926101	A8619261	2012	1	1	1	A861	1	68	#NULL!	2	2	2	7	7686.64	4989.92	#NULL!	10120.7	6036.85	5863.42	#NULL!	#NULL!	12746.5	#NULL!	512	1	2	8	2	8	2	8	2	8	8	1	2	2	3	2	8	2	8	8	8	8	1	1	1
2015.01.07	A861926102	A8619261	2012	1	1	1	A861	2	49	#NULL!	1	2	3	3	7686.64	10034.9	25365.1	#NULL!	10809.8	12003.7	#NULL!	26609.7	#NULL!	#NULL!	512	1	2	8	2	8	2	8	2	8	8	2	8	1	8	2	8	2	8	8	8	8	1	1	1
2015.01.07	A861926103	A8619261	2012	1	1	1	A861	2	19	#NULL!	1	2	3	3	7686.64	9416.55	#NULL!	28704.8	11506.9	17862.9	#NULL!	#NULL!	22478.1	#NULL!	512	1	2	8	2	8	2	8	8	8	8	2	8	1	8	2	8	2	8	8	8	8	1	1	1
2015.01.07	A861928501	A8619285	2012	1	1	1	A861	1	57	#NULL!	4	4	3	7	7686.64	10579.2	10574.4	#NULL!	11681.7	11272.5	#NULL!	11921.7	#NULL!	#NULL!	512	1	2	8	2	8	2	8	2	8	8	2	8	2	3	1	1	2	8	8	8	8	1	1	1
2015.01.07	A861928502	A8619285	2012	1	1	1	A861	2	54	#NULL!	4	4	4	3	7686.64	6325.97	9165.76	35682	6994.44	8553.57	39765.9	10122.2	46517.3	40767.7	512	1	2	8	1	2	2	8	1	3	2	2	8	1	8	2	8	2	8	8	8	8	1	1	1
2015.01.07	A861928503	A8619285	2012	1	1	1	A861	2	24	#NULL!	4	4	4	2	7686.64	8271.69	#NULL!	#NULL!	9156.73	14739.6	#NULL!	#NULL!	#NULL!	#NULL!	512	1	2	8	2	8	2	8	8	8	8	2	8	2	3	1	2	2	8	8	8	8	1	1	1
2015.01.07	A861929701	A8619297	2012	1	1	1	A861	2	74	#NULL!	1	1	1	7	7686.64	5530.41	#NULL!	#NULL!	5741.96	5335.66	#NULL!	#NULL!	#NULL!	#NULL!	512	1	2	8	2	8	2	8	1	2	1	2	8	2	3	1	1	1	1	2	1	2	1	1	1
2015.01.07	A861932401	A8619324	2012	1	1	1	A861	1	70	#NULL!	4	4	4	7	7686.64	5837.44	9756.13	#NULL!	6541.58	7409.01	#NULL!	10571.1	#NULL!	#NULL!	512	1	2	8	1	2	2	8	2	8	8	2	8	1	8	1	1	1	2	1	1	2	1	1	1
2015.01.07	A861932402	A8619324	2012	1	1	1	A861	2	68	#NULL!	4	4	1	7	7686.64	5582.35	7349.42	20893.9	6597.62	6802.33	30556.3	7608.03	25969.3	28801.3	512	1	2	8	1	2	2	8	1	2	1	1	2	2	3	1	2	1	1	2	1	2	1	1	1
2015.01.07	A862905101	A8629051	2012	1	1	2	A862	1	62	#NULL!	4	4	4	6	2783.43	8583.21	5251.19	#NULL!	5347.87	7160	#NULL!	5858.49	#NULL!	#NULL!	501	1	2	8	2	8	2	8	2	8	8	2	8	1	8	2	8	2	8	8	8	8	1	1	1
2015.01.07	A862906601	A8629066	2012	1	1	2	A862	1	49	#NULL!	3	4	4	1	2783.43	4127.48	6120.07	#NULL!	6359.43	8170.27	#NULL!	8414.77	#NULL!	#NULL!	501	1	1	2	2	8	2	8	2	8	8	2	8	1	8	2	8	1	2	1	1	2	1	1	1
2015.01.07	A862906602	A8629066	2012	1	1	2	A862	2	44	#NULL!	3	4	4	3	2783.43	2254.41	4061.2	12852.9	2347.2	3489.01	21936.5	3964.43	10364.3	19571.2	501	1	2	8	2	8	2	8	2	8	8	2	8	1	8	2	8	2	8	8	8	8	1	1	1
2015.01.07	A862906603	A8629066	2012	1	1	2	A862	2	14	#NULL!	4	4	1	#NULL!	2783.43	2034.83	#NULL!	12855.2	2036.95	3027.01	#NULL!	#NULL!	6091.05	#NULL!	501	1	2	8	2	8	2	8	8	8	8	8	8	1	8	2	8	2	8	8	8	8	1	1	1
2015.01.07	A862906604	A8629066	2012	1	1	2	A862	2	11	#NULL!	4	4	1	#NULL!	2783.43	2543.53	#NULL!	#NULL!	1923.79	3027.01	#NULL!	#NULL!	#NULL!	#NULL!	501	1	2	8	2	8	2	8	8	8	8	8	8	8	8	8	8	2	8	8	8	8	1	1	1
2015.01.07	A862907501	A8629075	2012	1	1	2	A862	1	39	#NULL!	4	4	4	1	2783.43	3679.86	#NULL!	13080.4	3811.17	6371.58	#NULL!	#NULL!	18951.7	#NULL!	501	1	2	8	2	8	2	8	8	8	8	2	8	1	8	1	1	1	1	2	1	1	1	1	1
2015.01.07	A862907502	A8629075	2012	1	1	2	A862	2	41	#NULL!	4	4	4	1	2783.43	2254.41	4061.2	#NULL!	2347.2	3489.01	#NULL!	3964.43	#NULL!	#NULL!	501	1	2	8	2	8	2	8	2	8	8	2	8	1	8	2	8	2	8	8	8	8	1	1	1
2015.01.07	A862907503	A8629075	2012	1	1	2	A862	2	13	#NULL!	4	4	1	#NULL!	2783.43	2034.83	#NULL!	#NULL!	2036.95	3027.01	#NULL!	#NULL!	#NULL!	#NULL!	501	1	1	1	2	8	2	8	8	8	8	8	8	1	8	2	8	2	8	8	8	8	1	1	1
2015.01.07	A862907504	A8629075	2012	1	1	2	A862	1	5	60	4	4	1	#NULL!	2783.43	2235.47	#NULL!	#NULL!	2056.37	2651.5	#NULL!	#NULL!	#NULL!	#NULL!	501	1	2	8	2	8	2	8	8	8	8	8	8	8	8	8	8	8	8	8	8	8	8	8	8
2015.01.07	A862909602	A8629096	2012	1	1	2	A862	2	41	#NULL!	3	4	4	3	2783.43	4508.81	4061.2	#NULL!	4694.39	13956	#NULL!	3964.43	#NULL!	#NULL!	501	1	2	8	2	8	2	8	1	2	2	2	8	1	8	2	8	2	8	8	8	8	1	1	1
2015.01.07	A862910801	A8629108	2012	1	1	2	A862	1	44	#NULL!	4	4	4	1	2783.43	4571.5	7790.47	14897.4	5479.62	9565.04	26626.4	11568.4	28162.3	37248.8	501	1	2	8	2	8	2	8	2	8	8	2	8	1	8	2	8	2	8	8	8	8	1	1	1
2015.01.07	A862910802	A8629108	2012	1	1	2	A862	2	41	#NULL!	4	4	4	7	2783.43	2254.41	4061.2	#NULL!	2347.2	3489.01	#NULL!	3964.43	#NULL!	#NULL!	501	1	2	8	2	8	2	8	1	2	2	2	8	1	8	2	8	2	8	8	8	8	1	1	1
2015.01.07	A862910803	A8629108	2012	1	1	2	A862	2	11	#NULL!	4	4	1	#NULL!	2783.43	2543.53	#NULL!	#NULL!	1923.79	3027.01	#NULL!	#NULL!	#NULL!	#NULL!	501	1	2	8	2	8	2	8	8	8	8	8	8	8	8	8	8	2	8	8	8	8	1	1	1
2015.01.07	A862910804	A8629108	2012	1	1	2	A862	1	8	#NULL!	4	4	1	#NULL!	2783.43	2235.47	#NULL!	#NULL!	2056.37	2651.5	#NULL!	#NULL!	#NULL!	#NULL!	501	1	2	8	2	8	2	8	8	8	8	8	8	8	8	8	8	2	8	8	8	8	1	1	1
2015.01.07	A862912002	A8629120	2012	1	1	2	A862	2	42	#NULL!	4	4	4	7	2783.43	4508.81	#NULL!	#NULL!	4694.39	4652.02	#NULL!	#NULL!	#NULL!	#NULL!	501	1	2	8	2	8	2	8	2	8	8	2	8	1	8	2	8	2	8	8	8	8	1	1	1
2015.01.07	A862912003	A8629120	2012	1	1	2	A862	2	11	#NULL!	4	4	1	#NULL!	2783.43	2543.53	#NULL!	#NULL!	1923.79	4036.01	#NULL!	#NULL!	#NULL!	#NULL!	501	1	2	8	2	8	2	8	8	8	8	8	8	8	8	8	8	2	8	8	8	8	1	1	1
2015.01.07	A862912004	A8629120	2012	1	1	2	A862	1	10	#NULL!	4	4	1	#NULL!	2783.43	2348.87	#NULL!	14036	2125.13	4531.07	#NULL!	#NULL!	13689.4	#NULL!	501	1	2	8	2	8	2	8	8	8	8	8	8	8	8	8	8	2	8	8	8	8	1	1	1
2015.01.07	A862913801	A8629138	2012	1	1	2	A862	1	76	#NULL!	4	4	3	7	2783.43	2189.23	3532.82	#NULL!	2147.33	3314.17	#NULL!	3759.56	#NULL!	#NULL!	501	1	2	8	2	8	2	8	2	8	8	1	2	3	3	1	2	1	2	1	1	1	1	1	1
2015.01.07	A862913802	A8629138	2012	1	1	2	A862	2	70	#NULL!	4	4	2	7	2783.43	3003.95	4023.69	#NULL!	2889.53	3580.09	#NULL!	4062.18	#NULL!	#NULL!	501	1	2	8	2	8	2	8	2	8	8	2	8	1	8	2	8	2	8	8	8	8	1	1	1
2015.01.07	A862915001	A8629150	2012	1	1	2	A862	1	41	#NULL!	4	4	4	1	2783.43	4571.5	7790.47	#NULL!	#NULL!	#NULL!	#NULL!	#NULL!	#NULL!	#NULL!	501	1	2	8	2	8	2	8	2	8	8	2	8	1	8	2	8	2	8	8	8	8	1	1	1
2015.01.07	A862915002	A8629150	2012	1	1	2	A862	2	37	#NULL!	4	4	4	7	2783.43	2391.92	#NULL!	12764	5020.21	5895.02	#NULL!	#NULL!	10196.2	#NULL!	501	1	2	8	2	8	2	8	8	8	8	2	8	1	8	1	2	2	8	8	8	8	1	1	1
2015.01.07	A862915003	A8629150	2012	1	1	2	A862	2	7	#NULL!	4	4	1	#NULL!	2783.43	5005.18	#NULL!	#NULL!	2835.24	5668.14	#NULL!	#NULL!	#NULL!	#NULL!	501	1	2	8	2	8	2	8	8	8	8	8	8	8	8	8	8	1	2	1	1	2	1	1	1
2015.01.07	A862915005	A8629150	2012	1	1	2	A862	2	1	22	4	4	1	#NULL!	2783.43	5352.14	#NULL!	#NULL!	2597.18	5636.94	#NULL!	#NULL!	#NULL!	#NULL!	501	1	8	8	8	8	8	8	8	8	8	8	8	8	8	8	8	8	8	8	8	8	8	8	8
2015.01.07	A862916501	A8629165	2012	1	1	2	A862	1	42	#NULL!	2	3	4	1	2783.43	4571.5	15580.9	#NULL!	5479.62	9565.04	#NULL!	23136.7	#NULL!	#NULL!	501	1	2	8	2	8	2	8	2	8	8	2	8	1	8	2	8	2	8	8	8	8	1	1	1
2015.01.07	A862916502	A8629165	2012	1	1	2	A862	2	43	#NULL!	2	3	4	1	2783.43	2254.41	#NULL!	#NULL!	2347.2	3489.01	#NULL!	#NULL!	#NULL!	#NULL!	501	1	2	8	2	8	2	8	1	2	2	2	8	1	8	2	8	2	8	8	8	8	1	1	1
2015.01.07	A862916503	A8629165	2012	1	1	2	A862	1	10	#NULL!	2	3	1	#NULL!	2783.43	2348.87	#NULL!	#NULL!	2125.13	3398.3	#NULL!	#NULL!	#NULL!	#NULL!	501	1	2	8	2	8	2	8	8	8	8	8	8	8	8	8	8	1	2	1	1	1	1	1	1
2015.01.07	A862916504	A8629165	2012	1	1	2	A862	1	6	81	2	3	1	#NULL!	2783.43	2235.47	#NULL!	#NULL!	2056.37	2651.5	#NULL!	#NULL!	#NULL!	#NULL!	501	1	2	8	2	8	2	8	8	8	8	8	8	8	8	8	8	2	8	8	8	8	1	1	1
2015.01.07	A862919201	A8629192	2012	1	1	2	A862	1	72	#NULL!	4	4	4	6	2783.43	1409.21	2355.21	#NULL!	1463.07	1657.08	#NULL!	2506.37	#NULL!	#NULL!	501	1	2	8	2	8	1	2	2	8	8	2	8	1	8	1	1	2	8	8	8	8	1	1	1
2015.01.07	A862919202	A8629192	2012	1	1	2	A862	2	67	#NULL!	4	4	4	7	2783.43	1347.63	1774.21	#NULL!	1475.61	1521.39	#NULL!	1803.85	#NULL!	#NULL!	501	1	2	8	2	8	2	8	2	8	8	2	8	1	8	2	8	2	8	8	8	8	1	1	1
2015.01.07	A862919802	A8629198	2012	1	1	2	A862	2	40	#NULL!	3	3	4	7	2783.43	4508.81	8122.39	#NULL!	3520.8	4652.02	#NULL!	7928.86	#NULL!	#NULL!	501	1	2	8	2	8	2	8	2	8	8	2	8	1	8	1	2	2	8	8	8	8	1	1	1
2015.01.07	A862919803	A8629198	2012	1	1	2	A862	1	14	#NULL!	3	3	1	#NULL!	2783.43	1879.1	#NULL!	#NULL!	3375.2	4531.07	#NULL!	#NULL!	#NULL!	#NULL!	501	1	1	2	2	8	2	8	8	8	8	8	8	1	8	2	8	2	8	8	8	8	1	1	1
2015.01.07	A862919804	A8629198	2012	1	1	2	A862	1	10	#NULL!	3	3	1	#NULL!	2783.43	2348.87	#NULL!	#NULL!	2125.13	4531.07	#NULL!	#NULL!	#NULL!	#NULL!	501	1	2	8	2	8	2	8	8	8	8	8	8	8	8	8	8	2	8	8	8	8	1	1	1
2015.01.07	A862920103	A8629201	2012	1	1	2	A862	1	28	#NULL!	4	4	4	2	2783.43	19581.8	#NULL!	20425.9	#NULL!	#NULL!	#NULL!	#NULL!	#NULL!	#NULL!	501	1	2	8	2	8	2	8	8	8	8	2	8	1	8	1	2	2	8	8	8	8	1	1	1
2015.01.07	A862921302	A8629213	2012	1	1	2	A862	2	43	#NULL!	4	4	3	7	2783.43	4508.81	#NULL!	#NULL!	3129.6	4361.27	#NULL!	#NULL!	#NULL!	#NULL!	501	1	2	8	2	8	2	8	2	8	8	2	8	1	8	2	8	2	8	8	8	8	1	1	1
2015.01.07	A862921303	A8629213	2012	1	1	2	A862	2	15	#NULL!	4	4	2	7	2783.43	3068.87	#NULL!	#NULL!	5147.21	7490.95	#NULL!	#NULL!	#NULL!	#NULL!	501	1	2	8	2	8	2	8	8	8	8	8	8	1	8	2	8	2	8	8	8	8	1	1	1
2015.01.07	A862921304	A8629213	2012	1	1	2	A862	2	14	#NULL!	4	4	1	#NULL!	2783.43	2034.83	#NULL!	19282.9	2715.94	3783.76	#NULL!	#NULL!	15227.6	#NULL!	501	1	2	8	2	8	1	2	8	8	8	8	8	1	8	1	2	1	1	1	1	1	1	1	1
2015.01.07	A862921305	A8629213	2012	1	1	2	A862	2	11	#NULL!	4	4	1	#NULL!	2783.43	2543.53	#NULL!	#NULL!	1923.79	3783.76	#NULL!	#NULL!	#NULL!	#NULL!	501	1	2	8	2	8	2	8	8	8	8	8	8	8	8	8	8	2	8	8	8	8	1	1	1
2015.01.07	A862923701	A8629237	2012	1	1	2	A862	1	61	#NULL!	4	4	3	7	2783.43	2861.07	2625.59	#NULL!	3565.25	2386.67	#NULL!	2929.24	#NULL!	#NULL!	501	1	2	8	2	8	2	8	2	8	8	2	8	1	8	2	8	2	8	8	8	8	1	1	1
2015.01.07	A862923702	A8629237	2012	1	1	2	A862	2	57	#NULL!	4	4	3	7	2783.43	2063.99	2592.86	#NULL!	2318.69	2403.58	#NULL!	2783.86	#NULL!	#NULL!	501	1	2	8	2	8	2	8	2	8	8	2	8	1	8	2	8	1	2	2	2	2	2	1	1
2015.01.07	A862923703	A8629237	2012	1	1	2	A862	2	52	#NULL!	4	4	3	3	2783.43	2290.71	3319.04	16151.1	2346.54	2869.61	26999.5	3599.91	15160.1	27679.7	501	1	2	8	2	8	2	8	2	8	8	2	8	2	3	2	8	2	8	8	8	8	1	1	1
2015.01.07	A862925501	A8629255	2012	1	1	2	A862	1	71	#NULL!	4	3	4	7	2783.43	1409.21	2355.21	#NULL!	1463.07	1657.08	#NULL!	2506.37	#NULL!	#NULL!	501	1	2	8	2	8	2	8	1	3	2	1	2	1	8	1	1	1	1	2	2	2	2	1	1
2015.01.07	A862925502	A8629255	2012	1	1	2	A862	2	64	#NULL!	3	3	4	7	2783.43	2105.39	2110.46	8378.51	2051.49	1816.54	13364.6	2198.57	5803.67	12985.6	501	1	2	8	2	8	2	8	1	3	2	1	1	1	8	1	1	1	1	1	1	2	1	1	1
2015.01.07	A862925503	A8629255	2012	1	1	2	A862	1	12	#NULL!	3	3	1	#NULL!	2783.43	1879.1	#NULL!	7018	2250.13	3398.3	#NULL!	#NULL!	5133.53	#NULL!	501	1	2	8	2	8	2	8	8	8	8	8	8	1	8	2	8	2	8	8	8	8	1	1	1
2015.01.07	A862928201	A8629282	2012	1	1	2	A862	1	68	#NULL!	4	4	4	7	2783.43	3613.82	2362.05	12216.1	4050.57	3934.2	11705.6	2426.93	11077.6	11487.9	501	1	2	8	2	8	2	8	2	8	8	2	8	1	8	2	8	1	1	1	2	2	1	1	1
2015.01.07	A862928202	A8629282	2012	1	1	2	A862	2	63	#NULL!	4	4	4	7	2783.43	4210.77	2110.46	#NULL!	4102.97	3633.08	#NULL!	2198.57	#NULL!	#NULL!	501	1	2	8	2	8	2	8	2	8	8	2	8	1	8	2	8	2	8	8	8	8	1	1	1
2015.01.07	A862930001	A8629300	2012	1	1	2	A862	2	57	#NULL!	4	4	4	7	2783.43	2063.99	2592.86	#NULL!	2318.69	2403.58	#NULL!	2783.86	#NULL!	#NULL!	501	1	1	2	2	8	2	8	2	8	8	2	8	1	8	2	8	2	8	8	8	8	1	1	1
2015.01.07	A862930002	A8629300	2012	1	1	2	A862	2	30	#NULL!	4	4	4	2	2783.43	3433.99	#NULL!	#NULL!	3353.01	4109.49	#NULL!	#NULL!	#NULL!	#NULL!	501	1	2	8	2	8	2	8	8	8	8	2	8	1	8	2	8	1	2	1	1	2	1	1	1
2015.01.07	A862930003	A8629300	2012	1	1	2	A862	1	32	#NULL!	4	4	4	1	2783.43	6929.05	#NULL!	28286.2	7346.31	10616	#NULL!	#NULL!	31039.1	#NULL!	501	1	2	8	2	8	2	8	8	8	8	2	8	1	8	1	2	1	1	2	2	2	1	1	1
2015.01.07	A862930601	A8629306	2012	1	1	2	A862	1	64	#NULL!	3	3	4	7	2783.43	2861.07	#NULL!	#NULL!	3565.25	2386.67	#NULL!	#NULL!	#NULL!	#NULL!	501	1	2	8	2	8	2	8	2	8	8	2	8	1	8	2	8	1	1	2	1	2	2	1	1
2015.01.07	A862930602	A8629306	2012	1	1	2	A862	2	59	#NULL!	3	3	4	7	2783.43	2063.99	5185.72	#NULL!	2318.69	2403.58	#NULL!	5567.71	#NULL!	#NULL!	501	1	2	8	2	8	2	8	2	8	8	2	8	1	8	2	8	2	8	8	8	8	1	1	1
2015.01.07	A863916801	A8639168	2012	1	1	1	A863	1	47	#NULL!	2	3	3	5	5490.46	8141.67	19545.4	#NULL!	12637.2	16235.6	#NULL!	27011.7	#NULL!	#NULL!	512	1	1	2	2	8	2	8	2	8	8	2	8	1	8	2	8	2	8	8	8	8	1	1	1
2015.01.07	A863916802	A8639168	2012	1	1	1	A863	2	45	#NULL!	2	3	2	7	5490.46	7167.78	#NULL!	17675	7206.55	8002.45	#NULL!	#NULL!	19338.8	#NULL!	512	1	2	8	2	8	1	2	2	8	8	2	8	3	3	2	8	2	8	8	8	8	1	1	1
2015.01.07	A863918601	A8639186	2012	1	1	1	A863	1	68	#NULL!	1	1	4	1	5490.46	3564.23	3771.79	#NULL!	4024.57	3908.95	#NULL!	3895.26	#NULL!	#NULL!	512	1	2	8	2	8	2	8	2	8	8	2	8	3	1	2	8	2	8	8	8	8	1	1	1
2015.01.07	A863918602	A8639186	2012	1	1	1	A863	2	67	#NULL!	1	1	4	7	5490.46	2658.26	2833.11	8291.24	2932.27	3023.26	13742.2	2895.2	9893.07	16191.2	512	1	2	8	2	8	2	8	1	1	2	2	8	3	1	2	8	2	8	8	8	8	1	1	1
2015.01.07	A863919801	A8639198	2012	1	1	1	A863	1	54	#NULL!	4	4	4	2	5490.46	10524.1	8879.27	#NULL!	14174.8	15924.5	#NULL!	11013	#NULL!	#NULL!	512	1	2	8	2	8	2	8	2	8	8	2	8	1	8	2	8	2	8	8	8	8	1	1	1
2015.01.07	A863919802	A8639198	2012	1	1	1	A863	2	52	#NULL!	4	4	4	7	5490.46	4518.55	5299.93	#NULL!	6217.28	7603.17	#NULL!	5777.91	#NULL!	#NULL!	512	1	2	8	2	8	2	8	2	8	8	2	8	1	8	2	8	2	8	8	8	8	1	1	1
2015.01.07	A863919803	A8639198	2012	1	1	1	A863	2	23	#NULL!	4	4	3	7	5490.46	5908.35	#NULL!	28050.6	8139.32	13101.9	#NULL!	#NULL!	34025.4	#NULL!	512	1	2	8	2	8	2	8	8	8	8	2	8	1	8	2	8	2	8	8	8	8	1	1	1
2015.01.07	A863919804	A8639198	2012	1	1	1	A863	2	20	#NULL!	4	4	3	7	5490.46	5908.35	#NULL!	#NULL!	#NULL!	#NULL!	#NULL!	#NULL!	#NULL!	#NULL!	512	1	2	8	2	8	2	8	8	8	8	2	8	1	8	2	8	2	8	8	8	8	1	1	1
2015.01.07	A863920701	A8639207	2012	1	1	1	A863	1	61	#NULL!	1	2	3	7	5490.46	5643.61	4192.62	8985.68	7084.73	4742.7	16505.2	4701.48	10947.2	20894.6	512	1	2	8	2	8	2	8	2	8	8	2	8	1	8	2	8	2	8	8	8	8	1	1	1
2015.01.07	A863920702	A8639207	2012	1	1	1	A863	2	59	#NULL!	1	2	1	2	5490.46	4071.33	4140.35	#NULL!	4607.62	4776.3	#NULL!	4468.13	#NULL!	#NULL!	512	1	2	8	2	8	1	2	2	8	8	2	8	1	8	2	8	2	8	8	8	8	1	1	1
2015.01.07	A863921301	A8639213	2012	1	1	1	A863	2	56	#NULL!	1	2	3	3	5490.46	4071.33	4140.35	13919.4	4607.62	4776.3	25216.4	4468.13	16192.4	30585.6	512	1	2	8	2	8	2	8	2	8	8	2	8	1	8	2	8	2	8	8	8	8	1	1	1
2015.01.07	A863921302	A8639213	2012	1	1	1	A863	1	47	#NULL!	1	2	3	6	5490.46	8141.67	9772.69	#NULL!	12637.2	16235.6	#NULL!	13505.8	#NULL!	#NULL!	512	1	2	8	2	8	2	8	2	8	8	2	8	1	8	2	8	2	8	8	8	8	1	1	1
2015.01.07	A863922202	A8639222	2012	1	1	1	A863	2	81	#NULL!	4	3	2	7	5490.46	3823.35	4283.42	#NULL!	3452.91	3557.11	#NULL!	4346.57	#NULL!	#NULL!	512	1	2	8	2	8	2	8	2	8	8	2	8	1	8	2	8	2	8	8	8	8	1	1	1
2015.01.07	A863923101	A8639231	2012	1	1	1	A863	1	57	#NULL!	2	3	1	3	5490.46	7556.58	6114.46	#NULL!	10383.7	10020	#NULL!	6805.13	#NULL!	#NULL!	512	1	2	8	2	8	2	8	2	8	8	2	8	1	8	2	8	2	8	8	8	8	1	1	1
2015.01.07	A863923102	A8639231	2012	1	1	1	A863	2	51	#NULL!	2	3	2	5	5490.46	4518.55	5299.93	#NULL!	6217.28	7603.17	#NULL!	5777.91	#NULL!	#NULL!	512	1	2	8	2	8	2	8	2	8	8	2	8	1	8	2	8	2	8	8	8	8	1	1	1
2015.01.07	A863923103	A8639231	2012	1	1	1	A863	1	28	#NULL!	3	3	4	3	5490.46	9656.53	#NULL!	26860.7	#NULL!	#NULL!	#NULL!	#NULL!	#NULL!	#NULL!	512	1	2	8	2	8	2	8	8	8	8	2	8	1	8	2	8	2	8	8	8	8	1	1	1
2015.01.07	A863923104	A8639231	2012	1	1	1	A863	2	25	#NULL!	2	3	3	7	5490.46	6364.2	#NULL!	#NULL!	9346.29	12547.4	#NULL!	#NULL!	#NULL!	#NULL!	512	1	2	8	2	8	2	8	8	8	8	2	8	1	8	2	8	2	8	8	8	8	1	1	1
2015.01.07	A863923701	A8639237	2012	1	1	1	A863	2	31	#NULL!	1	2	4	7	5490.46	13547.4	#NULL!	17376.9	6662.98	12249.3	#NULL!	#NULL!	21351.7	#NULL!	512	1	2	8	2	8	1	2	8	8	8	2	8	1	8	2	8	2	8	8	8	8	1	1	1
2015.01.07	A863923703	A8639237	2012	1	1	1	A863	1	1	14	1	2	1	#NULL!	5490.46	3250.09	#NULL!	#NULL!	3340.57	7530.51	#NULL!	#NULL!	#NULL!	#NULL!	512	1	8	8	8	8	8	8	8	8	8	8	8	8	8	8	8	8	8	8	8	8	8	8	8
2015.01.07	A863924001	A8639240	2012	1	1	1	A863	1	56	#NULL!	2	3	3	5	5490.46	7556.58	6114.46	5852.73	7787.79	7515.02	9806.69	6805.13	7007.97	11585.3	512	1	2	8	2	8	2	8	2	8	8	2	8	1	8	1	1	2	8	8	8	8	1	1	1
2015.01.07	A863925801	A8639258	2012	1	1	1	A863	2	41	#NULL!	4	4	4	3	5490.46	4446.93	6485.03	#NULL!	#NULL!	#NULL!	#NULL!	#NULL!	#NULL!	#NULL!	512	1	2	8	2	8	2	8	2	8	8	2	8	1	8	2	8	2	8	8	8	8	1	1	1
2015.01.07	A863925802	A8639258	2012	1	1	1	A863	1	48	#NULL!	4	4	3	1	5490.46	8141.67	9772.69	17117.4	#NULL!	#NULL!	31502.2	#NULL!	#NULL!	#NULL!	512	1	2	8	2	8	2	8	2	8	8	2	8	1	8	2	8	2	8	8	8	8	1	1	1
2015.01.07	A863926702	A8639267	2012	1	1	1	A863	2	31	#NULL!	2	3	3	7	5490.46	13547.4	#NULL!	17376.9	13326	10888.3	#NULL!	#NULL!	21351.7	#NULL!	512	1	2	8	2	8	1	2	8	8	8	2	8	1	8	2	8	2	8	8	8	8	1	1	1
2015.01.07	A863926703	A8639267	2012	1	1	1	A863	2	3	42	2	3	1	#NULL!	5490.46	5004.98	#NULL!	#NULL!	4553.84	8961.21	#NULL!	#NULL!	#NULL!	#NULL!	512	1	8	8	8	8	8	8	8	8	8	8	8	8	8	8	8	8	8	8	8	8	8	8	8
2015.01.07	A863926704	A8639267	2012	1	1	1	A863	1	1	21	2	3	1	#NULL!	5490.46	3250.09	#NULL!	#NULL!	3340.57	6693.79	#NULL!	#NULL!	#NULL!	#NULL!	512	1	8	8	8	8	8	8	8	8	8	8	8	8	8	8	8	8	8	8	8	8	8	8	8
2015.01.07	A863927601	A8639276	2012	1	1	1	A863	1	53	#NULL!	3	4	2	5	5490.46	10524.1	8879.27	#NULL!	#NULL!	#NULL!	#NULL!	#NULL!	#NULL!	#NULL!	512	1	2	8	2	8	2	8	2	8	8	2	8	1	8	2	8	2	8	8	8	8	1	1	1
2015.01.07	A863927602	A8639276	2012	1	1	1	A863	2	49	#NULL!	3	4	2	3	5490.46	7167.78	7333.45	#NULL!	9608.73	10669.9	#NULL!	15189.3	#NULL!	#NULL!	512	1	2	8	2	8	2	8	2	8	8	2	8	1	8	2	8	2	8	8	8	8	1	1	1
2015.01.07	A863927603	A8639276	2012	1	1	1	A863	2	26	#NULL!	3	4	3	3	5490.46	6364.2	#NULL!	#NULL!	9346.29	12547.4	#NULL!	#NULL!	#NULL!	#NULL!	512	1	2	8	2	8	2	8	8	8	8	2	8	1	8	2	8	2	8	8	8	8	1	1	1
2015.01.07	A863927604	A8639276	2012	1	1	1	A863	2	24	#NULL!	3	4	3	7	5490.46	5908.35	#NULL!	28050.6	8139.32	13101.9	#NULL!	#NULL!	34025.4	#NULL!	512	1	2	8	2	8	2	8	8	8	8	2	8	1	8	2	8	2	8	8	8	8	1	1	1
2015.01.07	A863928801	A8639288	2012	1	1	1	A863	2	52	#NULL!	1	2	3	7	5490.46	9037.1	5299.93	#NULL!	4662.96	11404.8	#NULL!	5777.91	#NULL!	#NULL!	512	1	1	2	1	2	2	8	2	8	8	2	8	1	8	2	8	2	8	8	8	8	1	1	1
2015.01.07	A863929701	A8639297	2012	1	1	1	A863	1	64	#NULL!	3	4	2	7	5490.46	7054.51	4192.62	#NULL!	8855.91	5420.22	#NULL!	4701.48	#NULL!	#NULL!	512	1	2	8	2	8	2	8	2	8	8	2	8	1	8	2	8	2	8	8	8	8	1	1	1
2015.01.07	A863929702	A8639297	2012	1	1	1	A863	2	62	#NULL!	4	4	1	7	5490.46	5191.23	3370.03	#NULL!	5095.8	4125.44	#NULL!	3528.74	#NULL!	#NULL!	512	1	2	8	2	8	2	8	1	1	2	2	8	2	3	2	8	2	8	8	8	8	1	1	1
2015.01.07	A863929703	A8639297	2012	1	1	1	A863	1	37	#NULL!	3	4	4	2	5490.46	9073.38	#NULL!	43002.9	9466.78	14470.1	#NULL!	#NULL!	55382.4	#NULL!	512	1	2	8	2	8	2	8	8	8	8	2	8	1	8	2	8	2	8	8	8	8	1	1	1
2015.01.07	A863929704	A8639297	2012	1	1	1	A863	2	34	#NULL!	3	4	4	7	5490.46	8467.14	#NULL!	#NULL!	8328.72	9332.83	#NULL!	#NULL!	#NULL!	#NULL!	512	1	2	8	2	8	1	2	8	8	8	2	8	1	8	2	8	2	8	8	8	8	1	1	1
2015.01.07	A863929705	A8639297	2012	1	1	1	A863	1	6	83	3	4	1	#NULL!	5490.46	3135.7	#NULL!	#NULL!	3245.04	6021.68	#NULL!	#NULL!	#NULL!	#NULL!	512	1	2	8	2	8	1	2	8	8	8	8	8	8	8	8	8	2	8	8	8	8	1	1	1
2015.01.07	A863929706	A8639297	2012	1	1	1	A863	1	5	63	3	4	1	#NULL!	5490.46	3135.7	#NULL!	#NULL!	3245.04	6021.68	#NULL!	#NULL!	#NULL!	#NULL!	512	1	2	8	2	8	1	2	8	8	8	8	8	8	8	8	8	8	8	8	8	8	8	8	8
2015.01.07	A863929707	A8639297	2012	1	1	1	A863	2	1	22	4	4	1	#NULL!	5490.46	5004.98	#NULL!	#NULL!	4553.84	7681.04	#NULL!	#NULL!	#NULL!	#NULL!	512	1	8	8	8	8	8	8	8	8	8	8	8	8	8	8	8	8	8	8	8	8	8	8	8
2015.01.07	A863930001	A8639300	2012	1	1	1	A863	1	60	#NULL!	2	2	1	3	5490.46	5643.61	4192.62	#NULL!	7084.73	4742.7	#NULL!	4701.48	#NULL!	#NULL!	512	1	2	8	2	8	2	8	2	8	8	2	8	1	8	2	8	2	8	8	8	8	1	1	1
2015.01.07	A863930002	A8639300	2012	1	1	1	A863	2	67	#NULL!	3	2	#NULL!	#NULL!	5490.46	2658.26	2833.11	#NULL!	2932.27	3023.26	#NULL!	2895.2	#NULL!	#NULL!	512	1	2	8	2	8	2	8	1	3	2	2	8	1	8	1	1	2	8	8	8	8	1	1	1
2015.01.07	A863932401	A8639324	2012	1	1	1	A863	1	76	#NULL!	2	1	3	7	5490.46	2878.91	7521.73	#NULL!	2844.74	3292.89	#NULL!	8045.54	#NULL!	#NULL!	512	1	2	8	2	8	2	8	2	8	8	2	8	1	8	2	8	2	8	8	8	8	1	1	1
2015.01.07	A863932402	A8639324	2012	1	1	1	A863	2	72	#NULL!	2	1	2	7	5490.46	3950.3	#NULL!	#NULL!	3827.98	3557.11	#NULL!	#NULL!	#NULL!	#NULL!	512	1	1	2	2	8	2	8	1	1	2	2	8	1	8	2	8	2	8	8	8	8	1	1	1
2015.01.07	A864912901	A8649129	2012	1	1	1	A864	1	61	#NULL!	2	3	4	1	6328.8	6505.33	7876.97	#NULL!	7656.09	5125.18	#NULL!	8202.08	#NULL!	#NULL!	512	1	2	8	1	2	2	8	2	8	8	1	1	1	8	2	8	1	1	2	2	1	1	2	1
2015.01.07	A864912902	A8649129	2012	1	1	1	A864	2	62	#NULL!	3	3	3	7	6328.8	4787.1	6331.52	#NULL!	4405.4	3900.88	#NULL!	6156.15	#NULL!	#NULL!	512	1	2	8	2	8	1	2	2	8	8	2	8	1	8	2	8	2	8	8	8	8	1	1	1
2015.01.07	A864914102	A8649141	2012	1	1	1	A864	2	39	#NULL!	4	4	3	3	6328.8	8157.9	#NULL!	36277.6	7187	10127.3	#NULL!	#NULL!	48298.9	#NULL!	512	1	2	8	1	1	2	8	8	8	8	2	8	1	8	2	8	1	2	2	2	2	2	2	1
2015.01.07	A864914103	A8649141	2012	1	1	1	A864	1	16	#NULL!	3	4	2	7	6328.8	10725.3	#NULL!	#NULL!	11740.8	17346.4	#NULL!	#NULL!	#NULL!	#NULL!	512	1	2	8	1	2	2	8	8	8	8	8	8	1	8	2	8	1	2	2	1	2	1	1	1
2015.01.07	A864914104	A8649141	2012	1	1	1	A864	1	34	#NULL!	3	4	3	5	6328.8	19788.9	#NULL!	#NULL!	21034.1	24829.6	#NULL!	#NULL!	#NULL!	#NULL!	512	1	2	8	2	8	2	8	8	8	8	1	1	1	8	2	8	2	8	8	8	8	1	1	1
2015.01.07	A864915001	A8649150	2012	1	1	1	A864	1	75	#NULL!	4	2	4	7	6328.8	3318.49	#NULL!	#NULL!	3074.15	3558.45	#NULL!	#NULL!	#NULL!	#NULL!	512	1	2	8	2	8	2	8	2	8	8	2	8	3	1	2	8	2	8	8	8	8	1	1	1
2015.01.07	A864915002	A8649150	2012	1	1	1	A864	2	76	#NULL!	4	2	4	7	6328.8	4407.13	#NULL!	#NULL!	3731.38	3843.98	#NULL!	#NULL!	#NULL!	#NULL!	512	1	1	2	2	8	2	8	2	8	8	2	8	3	3	1	2	1	2	2	2	1	1	2	1
2015.01.07	A864917101	A8649171	2012	1	1	1	A864	1	72	#NULL!	3	3	4	7	6328.8	3204.17	7065.8	47871.9	3141.84	3558.45	61914.3	7018.01	56807.9	68418.9	512	1	1	2	2	8	2	8	2	8	8	2	8	1	8	2	8	2	8	8	8	8	1	1	1
2015.01.07	A864917102	A8649171	2012	1	1	1	A864	2	65	#NULL!	3	3	3	7	6328.8	3064.15	5322.77	#NULL!	3168.75	3267.07	#NULL!	5050.89	#NULL!	#NULL!	512	1	2	8	2	8	2	8	2	8	8	2	8	1	8	2	8	2	8	8	8	8	1	1	1
2015.01.07	A864917103	A8649171	2012	1	1	1	A864	1	28	#NULL!	2	3	3	7	6328.8	11131	#NULL!	14513.5	14118.7	23027.5	#NULL!	#NULL!	22027	#NULL!	512	1	1	2	1	2	2	8	8	8	8	2	8	1	8	1	1	1	1	1	1	2	1	1	1
2015.01.07	A864918901	A8649189	2012	1	1	1	A864	2	84	#NULL!	1	1	1	7	6328.8	4407.13	#NULL!	#NULL!	3731.38	3843.98	#NULL!	#NULL!	#NULL!	#NULL!	512	1	2	8	2	8	2	8	2	8	8	2	8	1	8	2	8	2	8	8	8	8	1	1	1
2015.01.07	A864921602	A8649216	2012	1	1	1	A864	2	88	#NULL!	4	3	#NULL!	#NULL!	6328.8	6610.7	#NULL!	#NULL!	5597.07	5765.97	#NULL!	#NULL!	#NULL!	#NULL!	512	1	2	8	2	8	2	8	2	8	8	2	8	2	3	1	2	2	8	8	8	8	1	1	1
2015.01.07	A864921603	A8649216	2012	1	1	1	A864	1	28	#NULL!	3	3	4	7	6328.8	16696.5	#NULL!	29026.9	21178.1	26219.3	#NULL!	#NULL!	44053.9	#NULL!	512	1	1	2	1	2	2	8	8	8	8	2	8	1	8	2	8	1	1	2	1	1	1	1	1
2015.01.07	A864924001	A8649240	2012	1	1	1	A864	1	71	#NULL!	3	2	1	3	6328.8	3204.17	7065.8	#NULL!	3141.84	3558.45	#NULL!	7018.01	#NULL!	#NULL!	512	1	2	8	2	8	2	8	2	8	8	2	8	1	8	1	1	2	8	8	8	8	1	1	1
2015.01.07	A864924002	A8649240	2012	1	1	1	A864	2	64	#NULL!	2	2	2	7	6328.8	4787.1	6331.52	15875.5	4405.4	3900.88	17183.4	6156.15	18327.8	19478.8	512	1	2	8	2	8	2	8	2	8	8	2	8	1	8	2	8	2	8	8	8	8	1	1	1
2015.01.07	A864924301	A8649243	2012	1	1	1	A864	1	68	#NULL!	1	1	1	7	6328.8	4108.45	7086.33	8680.08	4349.14	4224.19	15050.4	6795.56	9838.94	17232.3	512	1	2	8	2	8	2	8	2	8	8	2	8	1	8	2	8	2	8	8	8	8	1	1	1
2015.01.07	A864924303	A8649243	2012	1	1	1	A864	1	31	#NULL!	1	1	3	7	6328.8	15754.8	#NULL!	26798.1	15775.6	22796.9	#NULL!	#NULL!	36757.7	#NULL!	512	1	2	8	2	8	2	8	8	8	8	2	8	1	8	2	8	2	8	8	8	8	1	1	1
2015.01.07	A864924901	A8649249	2012	1	1	1	A864	1	71	#NULL!	2	2	1	5	6328.8	3204.17	7065.8	#NULL!	3141.84	3558.45	#NULL!	7018.01	#NULL!	#NULL!	512	1	2	8	2	8	2	8	2	8	8	2	8	2	3	2	8	2	8	8	8	8	1	1	1
2015.01.07	A864924902	A8649249	2012	1	1	1	A864	2	64	#NULL!	2	2	1	7	6328.8	4787.1	6331.52	#NULL!	4405.4	3900.88	#NULL!	6156.15	#NULL!	#NULL!	512	1	2	8	2	8	2	8	2	8	8	2	8	2	3	1	2	2	8	8	8	8	1	1	1
2015.01.07	A864924903	A8649249	2012	1	1	1	A864	2	9	#NULL!	1	2	1	#NULL!	6328.8	12645	#NULL!	#NULL!	12087.4	7303.13	#NULL!	#NULL!	#NULL!	#NULL!	512	1	2	8	2	8	2	8	8	8	8	8	8	8	8	8	8	2	8	8	8	8	1	1	1
2015.01.07	A864925801	A8649258	2012	1	1	1	A864	1	76	#NULL!	1	1	4	7	6328.8	3318.49	#NULL!	#NULL!	3074.15	3558.45	#NULL!	#NULL!	#NULL!	#NULL!	512	1	2	8	2	8	2	8	1	3	2	2	8	1	8	2	8	2	8	8	8	8	1	1	1
2015.01.07	A864926702	A8649267	2012	1	1	1	A864	2	22	#NULL!	4	4	4	1	6328.8	6810.5	#NULL!	10104.3	6596.79	10618.9	#NULL!	#NULL!	11490.4	#NULL!	512	1	2	8	1	1	1	1	8	8	8	1	1	2	3	1	2	1	1	1	1	2	1	1	1
2015.01.07	A864927903	A8649279	2012	1	1	1	A864	2	47	#NULL!	3	4	2	3	6328.8	12393.3	13777.9	#NULL!	19104.3	21590.6	#NULL!	26498.8	#NULL!	#NULL!	512	1	2	8	2	8	1	2	1	3	2	2	8	2	3	1	2	2	8	8	8	8	1	1	1
2015.01.07	A864927904	A8649279	2012	1	1	1	A864	1	45	#NULL!	3	4	3	3	6328.8	14077.2	18360.6	36995.7	#NULL!	#NULL!	27177	#NULL!	#NULL!	#NULL!	512	1	1	2	1	2	2	8	2	8	8	2	8	2	3	2	8	1	1	1	1	2	1	1	1
2015.01.07	A864928501	A8649285	2012	1	1	1	A864	1	48	#NULL!	3	3	3	5	6328.8	9384.82	18360.6	18497.8	13656.4	17545	27177	23561.9	39423	38544	512	1	2	8	2	8	2	8	2	8	8	2	8	1	8	2	8	1	1	1	1	2	1	1	1
2015.01.07	A864928502	A8649285	2012	1	1	1	A864	2	44	#NULL!	3	3	4	1	6328.8	5125.93	12183.9	#NULL!	5040.42	7492.38	#NULL!	11100.7	#NULL!	#NULL!	512	1	2	8	2	8	2	8	2	8	8	2	8	1	8	1	1	2	8	8	8	8	1	1	1
2015.01.07	A864928503	A8649285	2012	1	1	1	A864	2	19	#NULL!	3	3	3	7	6328.8	7753.11	#NULL!	24618.9	8289.91	12869	#NULL!	#NULL!	28917.7	#NULL!	512	1	1	2	2	8	2	8	8	8	8	2	8	1	8	1	1	2	8	8	8	8	1	1	1
2015.01.07	A864928504	A8649285	2012	1	1	1	A864	2	14	#NULL!	3	3	1	#NULL!	6328.8	5140.74	#NULL!	#NULL!	4374.19	6500.26	#NULL!	#NULL!	#NULL!	#NULL!	512	1	2	8	1	2	2	8	8	8	8	8	8	1	8	2	8	1	1	2	1	1	1	1	1
2015.01.07	A864928505	A8649285	2012	1	1	1	A864	1	13	#NULL!	3	3	1	#NULL!	6328.8	4747.31	#NULL!	#NULL!	4831.98	7297.58	#NULL!	#NULL!	#NULL!	#NULL!	512	1	2	8	2	8	2	8	8	8	8	8	8	1	8	2	8	2	8	8	8	8	1	1	1
2015.01.07	A864929102	A8649291	2012	1	1	1	A864	2	43	#NULL!	3	4	4	7	6328.8	10251.9	#NULL!	#NULL!	10080.8	9989.83	#NULL!	#NULL!	#NULL!	#NULL!	512	1	2	8	1	2	2	8	2	8	8	1	1	1	8	2	8	1	1	1	1	2	1	1	1
2015.01.07	A864929103	A8649291	2012	1	1	1	A864	1	7	#NULL!	4	4	1	#NULL!	6328.8	8471.45	#NULL!	#NULL!	8766.85	7591.86	#NULL!	#NULL!	#NULL!	#NULL!	512	1	2	8	2	8	2	8	8	8	8	8	8	8	8	8	8	2	8	8	8	8	1	1	1
2015.01.07	A864929104	A8649291	2012	1	1	1	A864	2	4	51	4	4	1	#NULL!	6328.8	13521.5	#NULL!	#NULL!	12302.7	9683.9	#NULL!	#NULL!	#NULL!	#NULL!	512	1	2	8	2	8	2	8	8	8	8	8	8	8	8	8	8	8	8	8	8	8	8	8	8
2015.01.07	A864930302	A8649303	2012	1	1	1	A864	2	45	#NULL!	1	1	3	3	6328.8	16524.5	26316.4	25467.2	11681.6	12971.7	29413.7	26498.8	19592.3	34288.2	512	1	2	8	1	2	2	8	2	8	8	2	8	1	8	1	1	1	1	1	1	2	1	1	1
2015.01.07	A864930303	A8649303	2012	1	1	1	A864	1	16	#NULL!	1	1	2	7	6328.8	10725.3	#NULL!	29399.5	13208.3	19514.7	#NULL!	#NULL!	20965.1	#NULL!	512	1	2	8	1	2	2	8	8	8	8	8	8	1	8	2	8	1	1	2	2	1	1	1	1
2015.01.07	A865910501	A8659105	2012	1	1	1	A865	1	35	#NULL!	1	2	4	2	7671.27	10141.9	#NULL!	24033.4	#NULL!	#NULL!	#NULL!	#NULL!	#NULL!	#NULL!	512	1	2	8	2	8	2	8	8	8	8	2	8	1	8	2	8	2	8	8	8	8	1	1	1
2015.01.07	A865910502	A8659105	2012	1	1	1	A865	2	35	#NULL!	1	2	4	7	7671.27	6592.24	#NULL!	#NULL!	14255.2	13391.4	#NULL!	#NULL!	#NULL!	#NULL!	512	1	2	8	2	8	2	8	8	8	8	2	8	1	8	2	8	1	2	1	1	2	1	1	1
2015.01.07	A865910503	A8659105	2012	1	1	1	A865	1	4	56	2	2	1	#NULL!	7671.27	5342.38	#NULL!	#NULL!	5491.12	9565.12	#NULL!	#NULL!	#NULL!	#NULL!	512	1	2	8	2	8	1	2	8	8	8	8	8	8	8	8	8	8	8	8	8	8	8	8	8
2015.01.07	A865910504	A8659105	2012	1	1	1	A865	1	2	28	2	2	1	#NULL!	7671.27	5342.38	#NULL!	#NULL!	4118.34	9565.12	#NULL!	#NULL!	#NULL!	#NULL!	512	1	8	8	8	8	8	8	8	8	8	8	8	8	8	8	8	8	8	8	8	8	8	8	8
2015.01.07	A865912002	A8659120	2012	1	1	1	A865	2	66	#NULL!	4	4	1	7	7671.27	11142.4	18696.3	17376.8	5586.78	8640.19	24291.5	21289.7	29619.8	30528.4	512	1	2	8	2	8	2	8	2	8	8	2	8	1	8	1	2	2	8	8	8	8	1	1	1
2015.01.07	A865912004	A8659120	2012	1	1	1	A865	1	15	#NULL!	3	4	2	7	7671.27	13765.1	#NULL!	#NULL!	15525	21930	#NULL!	#NULL!	#NULL!	#NULL!	512	1	2	8	2	8	2	8	8	8	8	8	8	1	8	2	8	1	1	1	1	1	1	2	1
2015.01.07	A865913801	A8659138	2012	1	1	1	A865	1	40	#NULL!	2	3	4	1	7671.27	12599.3	27364.9	13685.9	#NULL!	#NULL!	23382	#NULL!	#NULL!	#NULL!	512	1	2	8	2	8	1	2	2	8	8	2	8	1	8	1	1	2	8	8	8	8	1	1	1
2015.01.07	A865916201	A8659162	2012	1	1	1	A865	2	61	#NULL!	1	1	#NULL!	#NULL!	7671.27	5802.55	#NULL!	#NULL!	5825.33	5158.18	#NULL!	#NULL!	#NULL!	#NULL!	512	1	2	8	2	8	2	8	2	8	8	2	8	1	8	2	8	2	8	8	8	8	1	1	1
2015.01.07	A865920101	A8659201	2012	1	1	1	A865	1	79	#NULL!	2	1	1	7	7671.27	4022.42	#NULL!	#NULL!	4065	4705.39	#NULL!	#NULL!	#NULL!	#NULL!	512	1	2	8	2	8	2	8	1	3	1	2	8	2	3	1	1	1	1	2	1	2	1	1	1
2015.01.07	A865920401	A8659204	2012	1	1	1	A865	1	53	#NULL!	3	4	3	3	7671.27	19605.6	27447	#NULL!	18989.2	21333.1	#NULL!	30637.8	#NULL!	#NULL!	512	1	2	8	2	8	2	8	2	8	8	2	8	1	8	2	8	1	1	2	1	2	1	1	1
2015.01.07	A865920403	A8659204	2012	1	1	1	A865	2	23	#NULL!	4	4	4	1	7671.27	11006.9	#NULL!	39192.2	10903.8	17551.9	#NULL!	#NULL!	63669.9	#NULL!	512	1	2	8	1	2	2	8	8	8	8	2	8	1	8	1	1	1	2	2	2	2	1	2	1
2015.01.07	A865920404	A8659204	2012	1	1	1	A865	2	18	#NULL!	4	4	3	7	7671.27	9950.52	#NULL!	#NULL!	13702.3	21271	#NULL!	#NULL!	#NULL!	#NULL!	512	1	1	1	1	1	2	8	8	8	8	8	8	1	8	1	1	1	1	2	1	1	1	1	1
2015.01.07	A865920405	A8659204	2012	1	1	1	A865	2	76	#NULL!	4	4	1	7	7671.27	7122.64	14133.6	#NULL!	6167.57	6353.68	#NULL!	15981.1	#NULL!	#NULL!	512	1	1	2	2	8	1	2	1	3	1	2	8	2	3	1	1	1	2	1	1	2	1	1	1
2015.01.07	A865921001	A8659210	2012	1	1	1	A865	1	56	#NULL!	2	2	3	7	7671.27	14077.4	#NULL!	#NULL!	13910.5	17897.7	#NULL!	#NULL!	#NULL!	#NULL!	512	1	2	8	2	8	2	8	1	2	2	2	8	1	8	1	1	1	2	1	2	2	1	1	1
2015.01.07	A865921003	A8659210	2012	1	1	1	A865	2	26	#NULL!	1	2	4	1	7671.27	11856.1	#NULL!	#NULL!	12520.7	20971.9	#NULL!	#NULL!	#NULL!	#NULL!	512	1	1	2	2	8	2	8	8	8	8	2	8	1	8	1	1	2	8	8	8	8	1	1	1
2015.01.07	A865921004	A8659210	2012	1	1	1	A865	2	25	#NULL!	1	2	3	1	7671.27	11856.1	#NULL!	35809.9	12520.7	20971.9	#NULL!	#NULL!	62497.1	#NULL!	512	1	2	8	2	8	2	8	8	8	8	2	8	1	8	2	8	1	1	1	1	2	1	1	1
2015.01.07	A865921301	A8659213	2012	1	1	1	A865	2	72	#NULL!	4	3	2	7	7671.27	5519.35	9422.43	#NULL!	5470	5082.95	#NULL!	10654.1	#NULL!	#NULL!	512	1	2	8	2	8	2	8	2	8	8	2	8	1	8	2	8	2	8	8	8	8	1	1	1
2015.01.07	A865926701	A8659267	2012	1	1	1	A865	1	36	#NULL!	1	2	4	2	7671.27	10141.9	#NULL!	#NULL!	#NULL!	#NULL!	#NULL!	#NULL!	#NULL!	#NULL!	512	1	2	8	2	8	2	8	8	8	8	2	8	2	3	2	8	2	8	8	8	8	1	1	1
2015.01.07	A865926702	A8659267	2012	1	1	1	A865	2	32	#NULL!	1	2	3	7	7671.27	9464.23	#NULL!	24279	19042.2	15558.9	#NULL!	#NULL!	31963.5	#NULL!	512	1	2	8	2	8	2	8	8	8	8	1	2	1	8	2	8	2	8	8	8	8	1	1	1
2015.01.07	A865926703	A8659267	2012	1	1	1	A865	1	6	77	1	2	1	#NULL!	7671.27	5154.34	#NULL!	#NULL!	5334.08	10038.8	#NULL!	#NULL!	#NULL!	#NULL!	512	1	2	8	2	8	1	2	8	8	8	8	8	8	8	8	8	1	2	1	2	2	1	2	1
2015.01.07	A865926704	A8659267	2012	1	1	1	A865	2	4	53	1	2	1	#NULL!	7671.27	8227.01	#NULL!	#NULL!	7485.44	12805.2	#NULL!	#NULL!	#NULL!	#NULL!	512	1	2	8	2	8	1	2	8	8	8	8	8	8	8	8	8	8	8	8	8	8	8	8	8
2015.01.07	A865927602	A8659276	2012	1	1	1	A865	2	40	#NULL!	2	3	3	3	7671.27	9319.88	#NULL!	17711.7	8886.69	13209.7	#NULL!	#NULL!	27204.3	#NULL!	512	1	2	8	2	8	2	8	1	3	1	2	8	1	8	1	1	1	1	1	1	2	1	1	1
2015.01.07	A865927603	A8659276	2012	1	1	1	A865	2	19	#NULL!	2	3	3	7	7671.27	14096.6	#NULL!	23872.8	14615.8	21729.8	#NULL!	#NULL!	25637.9	#NULL!	512	1	2	8	2	8	1	2	8	8	8	2	8	1	8	1	1	2	8	8	8	8	1	1	1
2015.01.07	A865927604	A8659276	2012	1	1	1	A865	2	15	#NULL!	2	3	2	6	7671.27	9950.52	#NULL!	#NULL!	14615.8	21729.8	#NULL!	#NULL!	#NULL!	#NULL!	512	1	2	8	2	8	2	8	8	8	8	8	8	1	8	1	1	2	8	8	8	8	1	1	1
2015.01.07	A865929101	A8659291	2012	1	1	1	A865	1	54	#NULL!	4	4	2	5	7671.27	19765.6	27447	48778.5	20891.9	21796.1	35471	30637.8	61599.5	47309.9	512	1	2	8	2	8	2	8	2	8	8	2	8	1	8	2	8	1	1	1	1	2	1	1	1
2015.01.07	A865932101	A8659321	2012	1	1	1	A865	1	43	#NULL!	2	3	3	5	7671.27	12599.3	27364.9	13685.9	15559.7	24074.7	23382	31802.5	49280.5	43613.4	512	1	2	8	2	8	2	8	1	2	2	2	8	1	8	2	8	1	1	1	1	2	1	1	1
2015.01.07	A865932102	A8659321	2012	1	1	1	A865	2	36	#NULL!	3	3	3	3	7671.27	6592.24	#NULL!	11726.1	7127.61	10043.6	#NULL!	#NULL!	26763	#NULL!	512	1	2	8	2	8	2	8	8	8	8	2	8	1	8	2	8	2	8	8	8	8	1	1	1
2015.01.07	A865932103	A8659321	2012	1	1	1	A865	1	12	#NULL!	3	3	1	#NULL!	7671.27	6092.81	#NULL!	#NULL!	6389.4	9649.7	#NULL!	#NULL!	#NULL!	#NULL!	512	1	2	8	2	8	2	8	8	8	8	8	8	1	8	2	8	2	8	8	8	8	1	1	1
2015.01.07	A865932104	A8659321	2012	1	1	1	A865	2	10	#NULL!	3	3	1	#NULL!	7671.27	5864.66	#NULL!	#NULL!	4990.16	8595.38	#NULL!	#NULL!	#NULL!	#NULL!	512	1	2	8	2	8	2	8	8	8	8	8	8	8	8	8	8	2	8	8	8	8	1	1	1
2015.01.07	A866907201	A8669072	2012	1	1	2	A866	1	56	#NULL!	4	4	4	1	2772.56	4769.88	3716.37	#NULL!	3932.66	4743.64	#NULL!	4160.79	#NULL!	#NULL!	501	1	2	8	2	8	2	8	2	8	8	2	8	1	8	2	8	2	8	8	8	8	1	1	1
2015.01.07	A866907202	A8669072	2012	1	1	2	A866	2	50	#NULL!	4	4	4	7	2772.56	2852.21	3221.3	#NULL!	2354.69	3599.47	#NULL!	3532.72	#NULL!	#NULL!	501	1	2	8	1	2	2	8	2	8	8	2	8	1	8	1	1	1	1	1	1	2	1	1	1
2015.01.07	A866907203	A8669072	2012	1	1	2	A866	2	30	#NULL!	4	4	4	2	2772.56	4275.72	#NULL!	14624.9	3364.65	5154.7	#NULL!	#NULL!	14975.2	#NULL!	501	1	2	8	2	8	2	8	8	8	8	2	8	1	8	2	8	2	8	8	8	8	1	1	1
2015.01.07	A866907205	A8669072	2012	1	1	2	A866	2	24	#NULL!	4	4	3	7	2772.56	3729.48	#NULL!	11804.1	3082.63	6202.64	#NULL!	#NULL!	11932	#NULL!	501	1	2	8	1	2	2	8	8	8	8	2	8	1	8	1	1	1	2	1	1	2	1	1	1
2015.01.07	A866911102	A8669111	2012	1	1	2	A866	2	66	#NULL!	4	4	4	7	2772.56	1789.82	2582.95	#NULL!	1480.73	2035.57	#NULL!	2655.27	#NULL!	#NULL!	501	1	2	8	2	8	2	8	2	8	8	2	8	1	8	2	8	2	8	8	8	8	1	1	1
2015.01.07	A866911103	A8669111	2012	1	1	2	A866	1	31	#NULL!	4	4	#NULL!	#NULL!	2772.56	9202.64	#NULL!	#NULL!	7371.82	14203.8	#NULL!	#NULL!	#NULL!	#NULL!	501	1	2	8	2	8	2	8	8	8	8	2	8	1	8	2	8	2	8	8	8	8	1	1	1
2015.01.07	A866911104	A8669111	2012	1	1	2	A866	2	52	#NULL!	4	4	1	3	2772.56	3042.36	4831.95	#NULL!	2354.69	3839.43	#NULL!	5299.09	#NULL!	#NULL!	501	1	2	8	2	8	2	8	2	8	8	2	8	1	8	2	8	2	8	8	8	8	1	1	1
2015.01.07	A866911701	A8669117	2012	1	1	2	A866	1	70	#NULL!	4	4	3	7	2772.56	1403.7	2285.86	#NULL!	1835.19	1995.4	#NULL!	2459.6	#NULL!	#NULL!	501	1	2	8	1	2	1	2	2	8	8	2	8	1	8	2	8	2	8	8	8	8	1	1	1
2015.01.07	A866911702	A8669117	2012	1	1	2	A866	2	68	#NULL!	4	4	3	7	2772.56	1342.36	1721.97	#NULL!	1850.92	1832.01	#NULL!	1770.18	#NULL!	#NULL!	501	1	2	8	1	2	2	8	1	2	2	2	8	1	8	2	8	1	1	1	1	2	1	1	1
2015.01.07	A866911703	A8669117	2012	1	1	2	A866	1	41	#NULL!	4	4	4	1	2772.56	4553.65	7561.06	16488	6873.31	11517.9	55991.7	11352.5	46176.7	78329.1	501	1	2	8	1	2	2	8	2	8	8	2	8	1	8	2	8	1	1	1	1	2	1	1	1
2015.01.07	A866911704	A8669117	2012	1	1	2	A866	2	30	#NULL!	4	4	4	7	2772.56	3420.57	#NULL!	#NULL!	4205.82	4948.51	#NULL!	#NULL!	#NULL!	#NULL!	501	1	2	8	1	2	2	8	8	8	8	2	8	1	8	2	8	1	1	1	1	1	1	1	1
2015.01.07	A866911705	A8669117	2012	1	1	2	A866	2	4	50	4	4	1	#NULL!	2772.56	5054.8	#NULL!	#NULL!	6898.76	4072.69	#NULL!	#NULL!	#NULL!	#NULL!	501	1	2	8	2	8	2	8	8	8	8	8	8	8	8	8	8	8	8	8	8	8	8	8	8
2015.01.07	A866911707	A8669117	2012	1	1	2	A866	2	37	#NULL!	4	4	4	7	2772.56	2382.57	#NULL!	14126.9	#NULL!	#NULL!	#NULL!	#NULL!	#NULL!	#NULL!	501	1	2	8	1	1	2	8	8	8	8	2	8	1	8	2	8	1	2	1	1	1	1	1	1
2015.01.07	A866913502	A8669135	2012	1	1	2	A866	2	19	#NULL!	#NULL!	#NULL!	3	1	2772.56	10189.6	#NULL!	#NULL!	5165.08	21729.8	#NULL!	#NULL!	#NULL!	#NULL!	501	1	2	8	2	8	2	8	8	8	8	2	8	1	8	2	8	2	8	8	8	8	1	1	1
2015.01.07	A866915001	A8669150	2012	1	1	2	A866	1	50	#NULL!	4	4	4	1	2772.56	5314.41	5396.83	#NULL!	5368.46	6031.13	#NULL!	6733.57	#NULL!	#NULL!	501	1	2	8	2	8	2	8	2	8	8	2	8	1	8	1	1	2	8	8	8	8	1	1	1
2015.01.07	A866915002	A8669150	2012	1	1	2	A866	2	50	#NULL!	4	4	4	7	2772.56	2281.77	3221.3	#NULL!	2354.69	2879.57	#NULL!	3532.72	#NULL!	#NULL!	501	1	2	8	2	8	2	8	2	8	8	2	8	1	8	2	8	2	8	8	8	8	1	1	1
2015.01.07	A866916501	A8669165	2012	1	1	2	A866	1	36	#NULL!	3	3	4	1	2772.56	3665.48	#NULL!	11581.6	3824.41	6393.7	#NULL!	#NULL!	12429.7	#NULL!	501	1	2	8	2	8	2	8	8	8	8	2	8	1	8	2	8	2	8	8	8	8	1	1	1
2015.01.07	A866916502	A8669165	2012	1	1	2	A866	2	31	#NULL!	3	3	4	7	2772.56	3420.57	#NULL!	#NULL!	3364.65	4123.76	#NULL!	#NULL!	#NULL!	#NULL!	501	1	2	8	1	2	2	8	8	8	8	2	8	1	8	1	1	1	1	1	1	2	1	1	1
2015.01.07	A866916503	A8669165	2012	1	1	2	A866	2	3	44	3	3	1	#NULL!	2772.56	5054.8	#NULL!	#NULL!	4599.18	3393.91	#NULL!	#NULL!	#NULL!	#NULL!	501	1	8	8	8	8	8	8	8	8	8	8	8	8	8	8	8	8	8	8	8	8	8	8	8
2015.01.07	A866917101	A8669171	2012	1	1	2	A866	1	61	#NULL!	1	2	4	7	2772.56	2849.9	#NULL!	#NULL!	3577.63	2394.95	#NULL!	#NULL!	#NULL!	#NULL!	501	1	2	8	2	8	2	8	2	8	8	2	8	1	8	2	8	1	1	1	1	2	1	1	1
2015.01.07	A866917102	A8669171	2012	1	1	2	A866	2	56	#NULL!	1	2	3	7	2772.56	2055.93	5033.02	9372	2326.75	2411.92	23719.6	5463.8	9085.35	23016.1	501	1	2	8	1	2	2	8	2	8	8	2	8	1	8	2	8	2	8	8	8	8	1	1	1
2015.01.07	A866920401	A8669204	2012	1	1	2	A866	2	62	#NULL!	4	4	4	2	2772.56	4194.33	4096.62	7418.47	4117.22	3645.7	18735.9	4315.08	7612.84	18204.6	501	1	2	8	2	8	2	8	2	8	8	2	8	1	8	2	8	2	8	8	8	8	1	1	1
2015.01.07	A866921901	A8669219	2012	1	1	2	A866	1	59	#NULL!	4	4	4	1	2772.56	5087.87	3716.37	#NULL!	#NULL!	#NULL!	#NULL!	#NULL!	#NULL!	#NULL!	501	1	2	8	2	8	2	8	2	8	8	2	8	1	8	2	8	1	1	2	2	2	1	1	1
2015.01.07	A866921902	A8669219	2012	1	1	2	A866	2	54	#NULL!	4	4	4	7	2772.56	3042.36	3221.3	#NULL!	4709.38	5759.15	#NULL!	7065.45	#NULL!	#NULL!	501	1	2	8	2	8	2	8	2	8	8	2	8	1	8	2	8	2	8	8	8	8	1	1	1
2015.01.07	A866921904	A8669219	2012	1	1	2	A866	1	27	#NULL!	4	4	3	7	2772.56	6501.77	#NULL!	18085.4	13195.1	21521.1	#NULL!	#NULL!	24398.3	#NULL!	501	1	2	8	2	8	2	8	8	8	8	2	8	1	8	1	1	1	1	1	1	2	1	1	1
2015.01.07	A866922801	A8669228	2012	1	1	2	A866	1	52	#NULL!	3	4	4	1	2772.56	5314.41	#NULL!	11753.1	7157.95	8041.51	#NULL!	#NULL!	11544	#NULL!	501	1	2	8	2	8	2	8	2	8	8	2	8	1	8	2	8	2	8	8	8	8	1	1	1
2015.01.07	A866922802	A8669228	2012	1	1	2	A866	2	48	#NULL!	3	4	4	1	2772.56	3619.57	8914.56	#NULL!	4852.19	5388.07	#NULL!	9287.01	#NULL!	#NULL!	501	1	2	8	2	8	2	8	1	2	2	2	8	1	8	2	8	1	1	1	1	2	1	1	1
2015.01.07	A866922803	A8669228	2012	1	1	2	A866	2	21	#NULL!	3	4	3	7	2772.56	2983.58	#NULL!	#NULL!	#NULL!	#NULL!	#NULL!	#NULL!	#NULL!	#NULL!	501	1	2	8	1	2	2	8	8	8	8	2	8	1	8	2	8	2	8	8	8	8	1	1	1
2015.01.07	A866922804	A8669228	2012	1	1	2	A866	1	20	#NULL!	4	4	3	1	2772.56	9837.15	#NULL!	11124.9	16346.4	18538.5	#NULL!	#NULL!	14188	#NULL!	501	1	1	2	2	8	2	8	8	8	8	2	8	1	8	2	8	2	8	8	8	8	1	1	1
2015.01.07	A866926101	A8669261	2012	1	1	2	A866	1	63	#NULL!	4	4	2	1	2772.56	2849.9	2548.28	#NULL!	#NULL!	#NULL!	#NULL!	#NULL!	#NULL!	#NULL!	501	1	2	8	1	2	2	8	1	1	2	2	8	1	8	1	2	1	1	2	1	1	1	1	1
2015.01.07	A866926102	A8669261	2012	1	1	2	A866	2	62	#NULL!	4	4	3	7	2772.56	2097.16	2048.31	#NULL!	3087.92	2734.27	#NULL!	4315.08	#NULL!	#NULL!	501	1	2	8	2	8	1	2	2	8	8	2	8	1	8	2	8	2	8	8	8	8	1	1	1
2015.01.07	A866926103	A8669261	2012	1	1	2	A866	2	28	#NULL!	4	4	4	1	2772.56	3213.78	#NULL!	12942.5	5309.63	7128.19	#NULL!	#NULL!	14054.6	#NULL!	501	1	2	8	1	2	2	8	8	8	8	2	8	1	8	2	8	1	1	1	1	2	1	1	1
2015.01.07	A866926701	A8669267	2012	1	1	2	A866	1	32	#NULL!	4	4	4	7	2772.56	9202.64	#NULL!	33393.5	9829.09	14203.8	#NULL!	#NULL!	40714.9	#NULL!	501	1	2	8	2	8	2	8	8	8	8	2	8	1	8	1	1	2	8	8	8	8	1	1	1
2015.01.07	A866926702	A8669267	2012	1	1	2	A866	2	29	#NULL!	4	4	4	7	2772.56	4285.03	#NULL!	#NULL!	4719.67	6336.17	#NULL!	#NULL!	#NULL!	#NULL!	501	1	2	8	2	8	2	8	8	8	8	2	8	1	8	2	8	2	8	8	8	8	1	1	1
2015.01.07	A866926705	A8669267	2012	1	1	2	A866	2	57	#NULL!	4	4	3	7	2772.56	2741.24	5033.02	#NULL!	3102.33	3215.9	#NULL!	5463.8	#NULL!	#NULL!	501	1	2	8	2	8	2	8	2	8	8	2	8	1	8	1	1	2	8	8	8	8	1	1	1
2015.01.07	A866927601	A8669276	2012	1	1	2	A866	1	53	#NULL!	3	4	4	2	2772.56	5314.41	5396.83	#NULL!	5368.46	6031.13	#NULL!	6733.57	#NULL!	#NULL!	501	1	1	2	2	8	1	2	2	8	8	2	8	1	8	2	8	2	8	8	8	8	1	1	1
2015.01.07	A866927602	A8669276	2012	1	1	2	A866	2	54	#NULL!	4	4	4	1	2772.56	2281.77	3221.3	#NULL!	2354.69	2879.57	#NULL!	3532.72	#NULL!	#NULL!	501	1	2	8	2	8	2	8	1	2	2	2	8	1	8	1	1	2	8	8	8	8	1	1	1
2015.01.07	A866927603	A8669276	2012	1	1	2	A866	2	26	#NULL!	4	4	4	7	2772.56	3213.78	#NULL!	#NULL!	3539.75	4752.13	#NULL!	#NULL!	#NULL!	#NULL!	501	1	2	8	2	8	2	8	8	8	8	2	8	1	8	2	8	1	2	1	1	2	1	1	1
2015.01.07	A866927901	A8669279	2012	1	1	2	A866	2	58	#NULL!	1	2	2	7	2772.56	6167.79	2516.51	#NULL!	#NULL!	#NULL!	#NULL!	#NULL!	#NULL!	#NULL!	501	1	1	2	2	8	2	8	2	8	8	2	8	2	3	2	8	2	8	8	8	8	1	1	1
2015.01.07	A866928501	A8669285	2012	1	1	2	A866	2	54	#NULL!	3	4	4	1	2772.56	2281.77	3221.3	#NULL!	2354.69	2879.57	#NULL!	3532.72	#NULL!	#NULL!	501	1	2	8	2	8	2	8	2	8	8	2	8	1	8	2	8	1	1	1	1	2	1	1	1
2015.01.07	A866932402	A8669324	2012	1	1	2	A866	2	65	#NULL!	#NULL!	#NULL!	4	7	2772.56	4027.09	#NULL!	#NULL!	2221.1	4580.03	#NULL!	#NULL!	#NULL!	#NULL!	501	1	2	8	2	8	2	8	2	8	8	2	8	1	8	1	1	2	8	8	8	8	1	1	1
2015.01.07	A867906301	A8679063	2012	1	1	2	A867	1	41	#NULL!	3	4	4	3	2935.65	4821.51	18258.9	#NULL!	5822.1	10162.9	#NULL!	30367	#NULL!	#NULL!	501	1	2	8	2	8	2	8	2	8	8	2	8	1	8	2	8	2	8	8	8	8	1	1	1
2015.01.07	A867906302	A8679063	2012	1	1	2	A867	2	41	#NULL!	3	4	4	7	2935.65	2377.7	#NULL!	9858.79	2493.9	3707.08	#NULL!	#NULL!	7287.39	#NULL!	501	1	2	8	2	8	2	8	2	8	8	2	8	1	8	2	8	2	8	8	8	8	1	1	1
2015.01.07	A867906303	A8679063	2012	1	1	2	A867	1	12	#NULL!	4	4	1	#NULL!	2935.65	2202.07	#NULL!	7602.83	2390.77	3610.7	#NULL!	#NULL!	4812.68	#NULL!	501	1	2	8	1	2	2	8	8	8	8	8	8	1	8	2	8	1	1	1	1	2	1	1	1
2015.01.07	A867906304	A8679063	2012	1	1	2	A867	2	9	#NULL!	4	4	1	#NULL!	2935.65	3575.13	#NULL!	#NULL!	2990.29	3613.44	#NULL!	#NULL!	#NULL!	#NULL!	501	1	2	8	2	8	1	2	8	8	8	8	8	8	8	8	8	2	8	8	8	8	1	1	1
2015.01.07	A867907801	A8679078	2012	1	1	2	A867	1	49	#NULL!	3	4	4	5	2935.65	4353.2	7171.95	#NULL!	6756.89	8680.91	#NULL!	11044.4	#NULL!	#NULL!	501	1	2	8	2	8	2	8	2	8	8	2	8	1	8	2	8	2	8	8	8	8	1	1	1
2015.01.07	A867907802	A8679078	2012	1	1	2	A867	2	49	#NULL!	3	4	4	7	2935.65	3832.49	5381.85	#NULL!	3853.21	4278.76	#NULL!	6210.51	#NULL!	#NULL!	501	1	2	8	2	8	2	8	2	8	8	2	8	1	8	2	8	2	8	8	8	8	1	1	1
2015.01.07	A867907803	A8679078	2012	1	1	2	A867	2	22	#NULL!	3	4	3	7	2935.65	3159.09	#NULL!	12271.2	3263.96	5254	#NULL!	#NULL!	13644.6	#NULL!	501	1	2	8	2	8	2	8	8	8	8	2	8	1	8	2	8	2	8	8	8	8	1	1	1
2015.01.07	A867908701	A8679087	2012	1	1	2	A867	1	46	#NULL!	4	4	4	1	2935.65	4353.2	#NULL!	9984.39	6756.89	8680.91	#NULL!	#NULL!	12483.7	#NULL!	501	1	2	8	2	8	2	8	2	8	8	2	8	1	8	2	8	2	8	8	8	8	1	2	1
2015.01.07	A867908702	A8679087	2012	1	1	2	A867	2	43	#NULL!	4	4	4	7	2935.65	2377.7	#NULL!	#NULL!	2493.9	3707.08	#NULL!	#NULL!	#NULL!	#NULL!	501	1	1	2	1	2	2	8	2	8	8	2	8	1	8	2	8	1	2	1	1	2	1	1	1
2015.01.07	A867908703	A8679087	2012	1	1	2	A867	1	15	#NULL!	4	4	2	7	2935.65	4975	#NULL!	18910.2	4356.81	6437	#NULL!	#NULL!	11064.6	#NULL!	501	1	2	8	2	8	2	8	8	8	8	8	8	1	8	2	8	1	2	2	1	2	1	1	1
2015.01.07	A867908704	A8679087	2012	1	1	2	A867	2	11	#NULL!	4	4	1	#NULL!	2935.65	2725.22	#NULL!	#NULL!	2028.99	3216.2	#NULL!	#NULL!	#NULL!	#NULL!	501	1	2	8	2	8	2	8	8	8	8	8	8	8	8	8	8	2	8	8	8	8	1	1	1
2015.01.07	A867911401	A8679114	2012	1	1	2	A867	1	49	#NULL!	3	4	4	1	2935.65	4353.2	14343.9	#NULL!	#NULL!	#NULL!	#NULL!	#NULL!	#NULL!	#NULL!	501	1	2	8	2	8	2	8	2	8	8	2	8	1	8	1	1	2	8	8	8	8	1	1	1
2015.01.07	A867911402	A8679114	2012	1	1	2	A867	2	48	#NULL!	3	4	4	7	2935.65	3832.49	#NULL!	7732.21	5779.82	6418.15	#NULL!	#NULL!	7755.09	#NULL!	501	1	2	8	1	2	2	8	2	8	8	2	8	1	8	1	1	1	1	2	2	1	2	2	1
2015.01.07	A867911403	A8679114	2012	1	1	2	A867	2	23	#NULL!	3	4	3	7	2935.65	3159.09	#NULL!	6135.6	4895.94	7881	#NULL!	#NULL!	6822.28	#NULL!	501	1	2	8	2	8	2	8	8	8	8	2	8	1	8	2	8	1	1	1	2	1	1	1	1
2015.01.07	A867913201	A8679132	2012	1	1	2	A867	1	39	#NULL!	2	3	3	7	2935.65	3881.1	#NULL!	10033.2	4049.37	6769.8	#NULL!	#NULL!	17767.2	#NULL!	501	1	2	8	2	8	2	8	8	8	8	2	8	1	8	2	8	2	8	8	8	8	1	1	1
2015.01.07	A867913202	A8679132	2012	1	1	2	A867	2	41	#NULL!	2	3	4	2	2935.65	2377.7	#NULL!	#NULL!	2493.9	3707.08	#NULL!	#NULL!	#NULL!	#NULL!	501	1	1	2	1	1	2	8	2	8	8	2	8	1	8	2	8	1	1	2	2	1	2	2	2
2015.01.07	A867913203	A8679132	2012	1	1	2	A867	2	11	#NULL!	2	3	1	#NULL!	2935.65	2725.22	#NULL!	#NULL!	2028.99	3216.2	#NULL!	#NULL!	#NULL!	#NULL!	501	1	2	8	2	8	2	8	8	8	8	8	8	8	8	8	8	1	1	2	1	2	1	1	1
2015.01.07	A867916201	A8679162	2012	1	1	2	A867	1	40	#NULL!	2	3	4	2	2935.65	4821.51	9129.46	#NULL!	5822.1	10162.9	#NULL!	15183.5	#NULL!	#NULL!	501	1	2	8	2	8	2	8	2	8	8	2	8	1	8	2	8	2	8	8	8	8	1	1	1
2015.01.07	A867916202	A8679162	2012	1	1	2	A867	2	37	#NULL!	2	3	4	7	2935.65	2522.73	#NULL!	9790.61	2666.99	3758.08	#NULL!	#NULL!	9558.92	#NULL!	501	1	2	8	2	8	2	8	8	8	8	2	8	1	8	1	1	2	8	8	8	8	1	1	1
2015.01.07	A867916203	A8679162	2012	1	1	2	A867	2	8	#NULL!	3	3	1	#NULL!	2935.65	3575.13	#NULL!	#NULL!	2990.29	3613.44	#NULL!	#NULL!	#NULL!	#NULL!	501	1	2	8	2	8	2	8	8	8	8	8	8	8	8	8	8	2	8	8	8	8	1	1	1
2015.01.07	A867916204	A8679162	2012	1	1	2	A867	1	7	#NULL!	3	3	1	#NULL!	2935.65	2395.14	#NULL!	#NULL!	2168.83	2817.22	#NULL!	#NULL!	#NULL!	#NULL!	501	1	2	8	1	2	2	8	8	8	8	8	8	8	8	8	8	1	2	1	1	2	1	1	1
2015.01.07	A867916205	A8679162	2012	1	1	2	A867	1	5	61	3	3	1	#NULL!	2935.65	2395.14	#NULL!	#NULL!	2168.83	2817.22	#NULL!	#NULL!	#NULL!	#NULL!	501	1	2	8	2	8	2	8	8	8	8	8	8	8	8	8	8	8	8	8	8	8	8	8	8
2015.01.07	A867917101	A8679171	2012	1	1	2	A867	2	72	#NULL!	4	4	#NULL!	#NULL!	2935.65	2112.15	3143.51	#NULL!	4093.5	3803.85	#NULL!	3554.41	#NULL!	#NULL!	501	1	2	8	2	8	2	8	2	8	8	1	2	1	8	2	8	2	8	8	8	8	1	1	1
2015.01.07	A867917102	A8679171	2012	1	1	2	A867	1	24	#NULL!	4	4	3	7	2935.65	10415.8	#NULL!	9637.63	#NULL!	#NULL!	#NULL!	#NULL!	#NULL!	#NULL!	501	1	2	8	2	8	2	8	8	8	8	2	8	1	8	2	8	2	8	8	8	8	1	1	1
2015.01.07	A867918901	A8679189	2012	1	1	2	A867	1	43	#NULL!	2	3	4	1	2935.65	4821.51	9129.46	#NULL!	5822.1	10162.9	#NULL!	15183.5	#NULL!	#NULL!	501	1	2	8	2	8	2	8	2	8	8	2	8	2	3	2	8	1	1	2	1	2	1	1	1
2015.01.07	A867918902	A8679189	2012	1	1	2	A867	2	36	#NULL!	3	3	4	7	2935.65	2522.73	#NULL!	#NULL!	2666.99	3758.08	#NULL!	#NULL!	#NULL!	#NULL!	501	1	2	8	1	2	2	8	8	8	8	2	8	1	8	2	8	2	8	8	8	8	1	1	1
2015.01.07	A867918903	A8679189	2012	1	1	2	A867	2	12	#NULL!	3	3	1	#NULL!	2935.65	2384.56	#NULL!	#NULL!	2164.26	3216.2	#NULL!	#NULL!	#NULL!	#NULL!	501	1	2	8	2	8	1	2	8	8	8	8	8	1	8	2	8	2	8	8	8	8	1	1	1
2015.01.07	A867918904	A8679189	2012	1	1	2	A867	1	9	#NULL!	3	3	1	#NULL!	2935.65	2395.14	#NULL!	#NULL!	2168.83	2817.22	#NULL!	#NULL!	#NULL!	#NULL!	501	1	2	8	2	8	1	2	8	8	8	8	8	8	8	8	8	2	8	8	8	8	1	1	1
2015.01.07	A867919801	A8679198	2012	1	1	2	A867	1	51	#NULL!	4	4	4	1	2935.65	5627.02	6516.29	10181.8	5684.25	6385.9	31556.8	9005.89	22001.4	47350.5	501	1	2	8	2	8	2	8	1	2	2	2	8	1	8	2	8	2	8	8	8	8	1	1	1
2015.01.07	A867919802	A8679198	2012	1	1	2	A867	2	48	#NULL!	4	4	4	7	2935.65	3832.49	5381.85	#NULL!	3853.21	4278.76	#NULL!	6210.51	#NULL!	#NULL!	501	1	2	8	2	8	2	8	1	2	2	2	8	1	8	1	1	2	8	8	8	8	1	1	1
2015.01.07	A867919803	A8679198	2012	1	1	2	A867	2	18	#NULL!	4	4	3	7	2935.65	3596.33	#NULL!	#NULL!	4101.68	6367.31	#NULL!	#NULL!	#NULL!	#NULL!	501	1	2	8	2	8	2	8	8	8	8	8	8	1	8	2	8	2	8	8	8	8	1	1	1
2015.01.07	A867919804	A8679198	2012	1	1	2	A867	1	15	#NULL!	4	4	1	7	2935.65	4975	#NULL!	#NULL!	4356.81	6437	#NULL!	#NULL!	#NULL!	#NULL!	501	1	2	8	2	8	2	8	8	8	8	8	8	1	8	1	2	2	8	8	8	8	1	1	1
2015.01.07	A867921302	A8679213	2012	1	1	2	A867	2	42	#NULL!	4	4	4	7	2935.65	4755.39	9518.43	#NULL!	3325.2	4942.77	#NULL!	10406.6	#NULL!	#NULL!	501	1	2	8	2	8	2	8	2	8	8	1	1	1	8	2	8	2	8	8	8	8	2	1	1
2015.01.07	A867921303	A8679213	2012	1	1	2	A867	2	16	#NULL!	4	4	2	7	2935.65	3596.33	#NULL!	19002.2	5468.91	8489.75	#NULL!	#NULL!	18314.1	#NULL!	501	1	2	8	2	8	2	8	8	8	8	8	8	1	8	1	1	2	8	8	8	8	1	1	1
2015.01.07	A867921304	A8679213	2012	1	1	2	A867	2	12	#NULL!	4	4	1	#NULL!	2935.65	2384.56	#NULL!	#NULL!	2885.68	4288.26	#NULL!	#NULL!	#NULL!	#NULL!	501	1	2	8	2	8	2	8	8	8	8	8	8	1	8	2	8	2	8	8	8	8	1	1	1
2015.01.07	A867921601	A8679216	2012	1	1	2	A867	1	41	#NULL!	3	4	3	3	2935.65	4821.51	9129.46	#NULL!	5822.1	10162.9	#NULL!	15183.5	#NULL!	#NULL!	501	1	2	8	2	8	2	8	1	2	2	2	8	1	8	2	8	1	2	1	1	2	1	1	1
2015.01.07	A867921602	A8679216	2012	1	1	2	A867	2	41	#NULL!	3	4	4	7	2935.65	2377.7	4759.21	#NULL!	2493.9	3707.08	#NULL!	5203.31	#NULL!	#NULL!	501	1	1	2	2	8	2	8	1	2	2	1	2	1	8	2	8	1	2	2	2	1	1	2	1
2015.01.07	A867921603	A8679216	2012	1	1	2	A867	2	13	#NULL!	4	4	1	#NULL!	2935.65	2384.56	#NULL!	#NULL!	2164.26	3216.2	#NULL!	#NULL!	#NULL!	#NULL!	501	1	2	8	2	8	2	8	8	8	8	8	8	1	8	2	8	1	1	2	1	1	1	1	1
2015.01.07	A867924002	A8679240	2012	1	1	2	A867	2	38	#NULL!	4	4	4	7	2935.65	5045.45	#NULL!	#NULL!	2666.99	4697.6	#NULL!	#NULL!	#NULL!	#NULL!	501	1	2	8	2	8	2	8	8	8	8	2	8	1	8	1	1	2	8	8	8	8	1	1	1
2015.01.07	A867924003	A8679240	2012	1	1	2	A867	2	12	#NULL!	4	4	1	#NULL!	2935.65	2384.56	#NULL!	#NULL!	2164.26	4020.25	#NULL!	#NULL!	#NULL!	#NULL!	501	1	2	8	2	8	2	8	8	8	8	8	8	1	8	1	1	2	8	8	8	8	1	1	1
2015.01.07	A867924004	A8679240	2012	1	1	2	A867	1	8	#NULL!	4	4	1	#NULL!	2935.65	2395.14	#NULL!	#NULL!	2168.83	3521.53	#NULL!	#NULL!	#NULL!	#NULL!	501	1	2	8	2	8	2	8	8	8	8	8	8	8	8	8	8	1	2	2	2	2	1	1	1
2015.01.07	A867924005	A8679240	2012	1	1	2	A867	2	3	38	4	4	1	#NULL!	2935.65	3822.96	#NULL!	#NULL!	2434.86	4491.94	#NULL!	#NULL!	#NULL!	#NULL!	501	1	8	8	8	8	8	8	8	8	8	8	8	8	8	8	8	8	8	8	8	8	8	8	8
2015.01.07	A867924602	A8679246	2012	1	1	2	A867	2	52	#NULL!	3	4	4	7	2935.65	9663.95	7778.99	16518.2	#NULL!	#NULL!	28124.5	#NULL!	#NULL!	#NULL!	501	1	2	8	2	8	2	8	2	8	8	2	8	1	8	2	8	2	8	8	8	8	1	1	1
2015.01.07	A867926402	A8679264	2012	1	1	2	A867	2	44	#NULL!	4	4	4	1	2935.65	4755.39	#NULL!	#NULL!	4987.79	11121.2	#NULL!	#NULL!	#NULL!	#NULL!	501	1	2	8	2	8	2	8	2	8	8	2	8	1	8	2	8	2	8	8	8	8	1	1	1
2015.01.07	A867927901	A8679279	2012	1	1	2	A867	2	42	#NULL!	4	4	4	1	2935.65	2377.7	4759.21	#NULL!	2493.9	3707.08	#NULL!	5203.31	#NULL!	#NULL!	501	1	2	8	2	8	2	8	1	2	1	1	1	1	8	1	1	1	2	2	2	1	1	1	1
2015.01.07	A867927902	A8679279	2012	1	1	2	A867	1	46	#NULL!	4	4	4	1	2935.65	4353.2	7171.95	9984.39	6756.89	8680.91	33026.8	11044.4	12483.7	60223.6	501	1	2	8	2	8	2	8	1	2	2	2	8	1	8	2	8	2	8	8	8	8	1	1	1
2015.01.07	A867927903	A8679279	2012	1	1	2	A867	1	15	#NULL!	4	4	2	7	2935.65	4975	#NULL!	#NULL!	4356.81	6437	#NULL!	#NULL!	#NULL!	#NULL!	501	1	2	8	2	8	1	2	8	8	8	8	8	1	8	2	8	2	8	8	8	8	1	1	1
2015.01.07	A867927904	A8679279	2012	1	1	2	A867	2	12	#NULL!	4	4	1	#NULL!	2935.65	2384.56	#NULL!	13926.5	2164.26	3216.2	#NULL!	#NULL!	5710.36	#NULL!	501	1	2	8	2	8	2	8	8	8	8	8	8	1	8	2	8	2	8	8	8	8	1	1	1
2015.01.07	A867929401	A8679294	2012	1	1	2	A867	1	44	#NULL!	4	4	4	3	2935.65	4821.51	9129.46	#NULL!	5822.1	10162.9	#NULL!	15183.5	#NULL!	#NULL!	501	1	1	2	2	8	2	8	2	8	8	2	8	1	8	2	8	2	8	8	8	8	2	2	1
2015.01.07	A867929402	A8679294	2012	1	1	2	A867	2	37	#NULL!	4	4	4	1	2935.65	2522.73	#NULL!	9790.61	2666.99	3758.08	#NULL!	#NULL!	7169.19	#NULL!	501	1	2	8	2	8	2	8	8	8	8	2	8	1	8	2	8	1	1	1	1	2	1	1	1
2015.01.07	A867929403	A8679294	2012	1	1	2	A867	2	11	#NULL!	4	4	1	#NULL!	2935.65	2725.22	#NULL!	6963.25	2028.99	3216.2	#NULL!	#NULL!	4282.77	#NULL!	501	1	2	8	2	8	2	8	8	8	8	8	8	8	8	8	8	2	8	8	8	8	1	1	1
2015.01.07	A868914702	A8689147	2012	1	1	2	A868	2	41	#NULL!	4	4	3	7	1739.64	2818.01	4822.67	#NULL!	1847.33	3432.48	#NULL!	4393.91	#NULL!	#NULL!	501	1	2	8	2	8	2	8	2	8	8	2	8	1	8	2	8	2	8	8	8	8	1	1	1
2015.01.07	A868914704	A8689147	2012	1	1	2	A868	2	14	#NULL!	4	4	1	#NULL!	1739.64	3391.38	#NULL!	10712.7	1603.16	2977.96	#NULL!	#NULL!	8652.06	#NULL!	501	1	2	8	1	2	2	8	8	8	8	8	8	1	8	1	2	1	1	2	2	1	1	1	1
2015.01.07	A868914705	A8689147	2012	1	1	2	A868	1	11	#NULL!	4	4	1	#NULL!	1739.64	1565.92	#NULL!	#NULL!	1366.15	3343.24	#NULL!	#NULL!	#NULL!	#NULL!	501	1	2	8	2	8	2	8	8	8	8	8	8	8	8	8	8	2	8	8	8	8	1	1	1
2015.01.07	A868915301	A8689153	2012	1	1	2	A868	2	47	#NULL!	4	4	4	7	1739.64	4542.2	5453.61	#NULL!	4281.34	3565.64	#NULL!	5244.43	#NULL!	#NULL!	501	1	2	8	2	8	2	8	1	2	2	2	8	1	8	2	8	2	8	8	8	8	1	1	1
2015.01.07	A868915304	A8689153	2012	1	1	2	A868	1	11	#NULL!	4	4	1	#NULL!	1739.64	1565.92	#NULL!	3898.89	1366.15	3008.91	#NULL!	#NULL!	5833.55	#NULL!	501	1	2	8	1	1	2	8	8	8	8	8	8	8	8	8	8	1	1	2	1	1	1	1	1
2015.01.07	A868915601	A8689156	2012	1	1	2	A868	1	54	#NULL!	4	4	4	1	1739.64	3334.53	3301.59	9333.31	4736.88	5321.59	19986	3802.49	10000.7	19992.4	501	1	2	8	2	8	2	8	2	8	8	2	8	1	8	1	1	2	8	8	8	8	1	1	1
2015.01.07	A868915602	A8689156	2012	1	1	2	A868	2	49	#NULL!	4	4	3	7	1739.64	2271.1	2726.81	#NULL!	3211.01	3565.64	#NULL!	2622.21	#NULL!	#NULL!	501	1	2	8	1	2	2	8	2	8	8	2	8	1	8	2	8	1	1	1	1	2	1	1	1
2015.01.07	A868915603	A8689156	2012	1	1	2	A868	2	23	#NULL!	4	4	4	1	1739.64	1872.05	#NULL!	7499.07	#NULL!	#NULL!	#NULL!	#NULL!	#NULL!	#NULL!	501	1	2	8	2	8	2	8	8	8	8	2	8	1	8	1	1	2	8	8	8	8	1	1	1
2015.01.07	A868917101	A8689171	2012	1	1	2	A868	1	47	#NULL!	3	4	4	1	1739.64	2579.68	7267.58	#NULL!	3753.83	9645.45	#NULL!	9326.37	#NULL!	#NULL!	501	1	2	8	2	8	2	8	2	8	8	2	8	1	8	2	8	2	8	8	8	8	1	1	1
2015.01.07	A868917102	A8689171	2012	1	1	2	A868	2	41	#NULL!	3	4	4	7	1739.64	1409	#NULL!	#NULL!	1385.5	4118.97	#NULL!	#NULL!	#NULL!	#NULL!	501	1	2	8	2	8	2	8	2	8	8	2	8	1	8	1	1	2	8	8	8	8	1	1	1
2015.01.07	A868918002	A8689180	2012	1	1	2	A868	2	41	#NULL!	4	4	4	1	1739.64	1409	#NULL!	#NULL!	1385.5	2059.49	#NULL!	#NULL!	#NULL!	#NULL!	501	1	2	8	2	8	2	8	2	8	8	2	8	1	8	2	8	2	8	8	8	8	1	1	1
2015.01.07	A868918003	A8689180	2012	1	1	2	A868	1	14	#NULL!	4	4	1	#NULL!	1739.64	1565.92	#NULL!	#NULL!	1328.2	2005.94	#NULL!	#NULL!	#NULL!	#NULL!	501	1	2	8	2	8	2	8	8	8	8	8	8	1	8	2	8	2	8	8	8	8	1	1	1
2015.01.07	A868918004	A8689180	2012	1	1	2	A868	1	8	#NULL!	4	4	1	#NULL!	1739.64	1490.31	#NULL!	#NULL!	1321.95	1565.12	#NULL!	#NULL!	#NULL!	#NULL!	501	1	2	8	2	8	2	8	8	8	8	8	8	8	8	8	8	2	8	8	8	8	1	1	1
2015.01.07	A868919201	A8689192	2012	1	1	2	A868	1	74	#NULL!	4	4	4	1	1739.64	880.755	1398.41	#NULL!	863.62	978.139	#NULL!	1388.95	#NULL!	#NULL!	501	1	2	8	2	8	2	8	2	8	8	2	8	1	8	1	1	1	2	1	1	2	1	1	1
2015.01.07	A868919202	A8689192	2012	1	1	2	A868	2	72	#NULL!	4	4	4	7	1739.64	1251.65	1592.71	#NULL!	1137.08	1056.62	#NULL!	1500.75	#NULL!	#NULL!	501	1	2	8	2	8	2	8	2	8	8	2	8	2	3	1	2	2	8	8	8	8	1	1	1
2015.01.07	A868919801	A8689198	2012	1	1	2	A868	1	53	#NULL!	4	4	#NULL!	#NULL!	1739.64	3334.53	#NULL!	#NULL!	#NULL!	#NULL!	#NULL!	#NULL!	#NULL!	#NULL!	501	1	1	2	2	8	2	8	1	2	2	2	8	2	3	2	8	1	2	2	2	1	1	1	1
2015.01.07	A868919802	A8689198	2012	1	1	2	A868	2	49	#NULL!	4	4	4	7	1739.64	2271.1	5453.61	#NULL!	3211.01	3565.64	#NULL!	5244.43	#NULL!	#NULL!	501	1	2	8	2	8	2	8	2	8	8	2	8	1	8	2	8	2	8	8	8	8	1	1	1
2015.01.07	A868919803	A8689198	2012	1	1	2	A868	2	23	#NULL!	4	4	3	7	1739.64	1872.05	#NULL!	14998.1	2719.97	4378.33	#NULL!	#NULL!	8269.43	#NULL!	501	1	2	8	2	8	2	8	8	8	8	2	8	1	8	2	8	2	8	8	8	8	1	1	1
2015.01.07	A868921602	A8689216	2012	1	1	2	A868	2	43	#NULL!	4	4	4	1	1739.64	2113.51	3617	#NULL!	1385.5	2574.36	#NULL!	3295.43	#NULL!	#NULL!	501	1	2	8	2	8	2	8	2	8	8	2	8	1	8	1	1	2	8	8	8	8	1	1	1
2015.01.07	A868921603	A8689216	2012	1	1	2	A868	1	14	#NULL!	4	4	#NULL!	#NULL!	1739.64	1565.92	#NULL!	#NULL!	1328.2	2507.43	#NULL!	#NULL!	#NULL!	#NULL!	501	1	2	8	2	8	2	8	8	8	8	8	8	1	8	1	1	2	8	8	8	8	1	1	1
2015.01.07	A868921604	A8689216	2012	1	1	2	A868	2	12	#NULL!	4	4	1	#NULL!	1739.64	1695.69	#NULL!	7141.8	1202.37	2233.47	#NULL!	#NULL!	8652.06	#NULL!	501	1	2	8	2	8	1	2	8	8	8	8	8	1	8	1	2	2	8	8	8	8	1	1	1
2015.01.07	A868921605	A8689216	2012	1	1	2	A868	2	72	#NULL!	4	4	1	7	1739.64	1877.47	2389.06	#NULL!	1137.08	1320.78	#NULL!	2251.12	#NULL!	#NULL!	501	1	2	8	2	8	2	8	2	8	8	2	8	2	3	2	8	2	8	8	8	8	1	1	1
2015.01.07	A868922501	A8689225	2012	1	1	2	A868	1	63	#NULL!	1	2	4	7	1739.64	1788.17	3117.89	6405.98	2104.49	1408.8	10959.2	3246.58	3547.44	11098.9	501	1	2	8	2	8	2	8	2	8	8	2	8	1	8	2	8	2	8	8	8	8	1	1	1
2015.01.07	A868922502	A8689225	2012	1	1	2	A868	2	60	#NULL!	2	2	3	7	1739.64	1315.87	#NULL!	#NULL!	1210.95	1072.26	#NULL!	#NULL!	#NULL!	#NULL!	501	1	2	8	1	2	2	8	2	8	8	2	8	2	3	2	8	1	1	2	1	2	1	1	1
2015.01.07	A868924001	A8689240	2012	1	1	2	A868	1	84	#NULL!	4	2	4	1	1739.64	912.18	#NULL!	#NULL!	845.016	978.139	#NULL!	#NULL!	#NULL!	#NULL!	501	1	2	8	2	8	2	8	2	8	8	2	8	1	8	2	8	2	8	8	8	8	1	1	1
2015.01.07	A868924002	A8689240	2012	1	1	2	A868	2	69	#NULL!	3	2	1	7	1739.64	842.267	3160.32	#NULL!	871.019	898.045	#NULL!	2998.89	#NULL!	#NULL!	501	1	2	8	2	8	2	8	2	8	8	2	8	1	8	2	8	2	8	8	8	8	1	1	1
2015.01.07	A868924004	A8689240	2012	1	1	2	A868	2	42	#NULL!	1	2	4	7	1739.64	1409	#NULL!	18074.4	1385.5	2059.49	#NULL!	#NULL!	8833.2	#NULL!	501	1	2	8	1	2	2	8	2	8	8	2	8	1	8	2	8	1	1	2	2	1	2	2	1
2015.01.07	A868925501	A8689255	2012	1	1	2	A868	1	77	#NULL!	4	4	#NULL!	#NULL!	1739.64	1368.27	2097.61	#NULL!	1267.52	1956.28	#NULL!	2083.42	#NULL!	#NULL!	501	1	2	8	2	8	2	8	1	2	2	2	8	1	8	2	8	2	8	8	8	8	1	1	1
2015.01.07	A868925502	A8689255	2012	1	1	2	A868	2	72	#NULL!	4	4	1	7	1739.64	1877.47	2389.06	#NULL!	1705.62	2113.25	#NULL!	2251.12	#NULL!	#NULL!	501	1	2	8	2	8	2	8	2	8	8	2	8	1	8	2	8	2	8	8	8	8	1	1	1
2015.01.07	A868927301	A8689273	2012	1	1	2	A868	1	70	#NULL!	4	4	4	7	1739.64	880.755	1398.41	#NULL!	863.62	978.139	#NULL!	1388.95	#NULL!	#NULL!	501	1	2	8	2	8	2	8	2	8	8	2	8	2	3	2	8	1	1	1	1	2	1	1	1
2015.01.07	A868928801	A8689288	2012	1	1	2	A868	2	41	#NULL!	2	2	4	7	1739.64	2818.01	4822.67	#NULL!	1847.33	2745.98	#NULL!	4393.91	#NULL!	#NULL!	501	1	2	8	2	8	2	8	1	2	2	2	8	1	8	2	8	2	8	8	8	8	1	1	1
2015.01.07	A868928803	A8689288	2012	1	1	2	A868	1	16	#NULL!	2	2	2	7	1739.64	3537.78	#NULL!	9697.53	3227.27	4768.15	#NULL!	#NULL!	13411.7	#NULL!	501	1	2	8	1	2	2	8	8	8	8	8	8	1	8	2	8	1	1	1	1	2	1	1	1
2015.01.07	A868928804	A8689288	2012	1	1	2	A868	1	13	#NULL!	2	2	1	#NULL!	1739.64	1565.92	#NULL!	#NULL!	1770.94	2674.59	#NULL!	#NULL!	#NULL!	#NULL!	501	1	2	8	2	8	2	8	8	8	8	8	8	1	8	2	8	1	1	1	1	2	1	1	1
2015.01.07	A868929101	A8689291	2012	1	1	2	A868	1	44	#NULL!	1	2	4	1	1739.64	2857.19	9251.18	13966.3	3234.5	5646.03	26349	12821.6	21335.1	36860.7	501	1	2	8	2	8	2	8	2	8	8	2	8	1	8	2	8	2	8	8	8	8	1	1	1
2015.01.07	A868929102	A8689291	2012	1	1	2	A868	2	43	#NULL!	1	2	3	2	1739.64	1409	#NULL!	#NULL!	1385.5	2059.49	#NULL!	#NULL!	#NULL!	#NULL!	501	1	2	8	2	8	2	8	2	8	8	2	8	1	8	1	1	2	8	8	8	8	1	1	1
2015.01.07	A868929103	A8689291	2012	1	1	2	A868	1	13	#NULL!	1	2	1	#NULL!	1739.64	1565.92	#NULL!	#NULL!	1328.2	2005.94	#NULL!	#NULL!	#NULL!	#NULL!	501	1	2	8	2	8	2	8	8	8	8	8	8	1	8	2	8	1	1	1	1	2	1	1	1
2015.01.07	A868929104	A8689291	2012	1	1	2	A868	2	10	#NULL!	1	2	1	#NULL!	1739.64	1695.69	#NULL!	#NULL!	1236.72	1786.78	#NULL!	#NULL!	#NULL!	#NULL!	501	1	2	8	1	2	2	8	8	8	8	8	8	8	8	8	8	2	8	8	8	8	1	1	1
2015.01.07	A868929105	A8689291	2012	1	1	2	A868	2	7	#NULL!	2	2	1	#NULL!	1739.64	2224.52	#NULL!	#NULL!	1822.66	2007.47	#NULL!	#NULL!	#NULL!	#NULL!	501	1	2	8	2	8	2	8	8	8	8	8	8	8	8	8	8	2	8	8	8	8	1	1	1
2015.01.07	A868930301	A8689303	2012	1	1	2	A868	1	70	#NULL!	3	2	4	1	1739.64	880.755	1398.41	#NULL!	863.62	978.139	#NULL!	1388.95	#NULL!	#NULL!	501	1	2	8	2	8	2	8	1	2	2	2	8	2	3	2	8	2	8	8	8	8	1	1	1
2015.01.07	A868930302	A8689303	2012	1	1	2	A868	2	65	#NULL!	3	2	4	7	1739.64	842.267	1053.44	#NULL!	871.019	898.045	#NULL!	999.631	#NULL!	#NULL!	501	1	1	2	2	8	2	8	2	8	8	2	8	2	3	2	8	2	8	8	8	8	1	1	1
2015.01.07	A868931501	A8689315	2012	1	1	2	A868	1	37	#NULL!	1	2	4	3	1739.64	2299.91	#NULL!	12262.9	2249.65	3761	#NULL!	#NULL!	7178.66	#NULL!	501	1	2	8	1	2	2	8	8	8	8	2	8	1	8	2	8	2	8	8	8	8	1	1	1
2015.01.07	A868931502	A8689315	2012	1	1	2	A868	2	34	#NULL!	1	2	4	7	1739.64	2146.24	#NULL!	#NULL!	1979.21	2425.74	#NULL!	#NULL!	#NULL!	#NULL!	501	1	2	8	1	2	2	8	8	8	8	2	8	1	8	2	8	2	8	8	8	8	1	1	1
2015.01.07	A868931503	A8689315	2012	1	1	2	A868	1	8	#NULL!	1	2	1	#NULL!	1739.64	1490.31	#NULL!	#NULL!	1321.95	1565.12	#NULL!	#NULL!	#NULL!	#NULL!	501	1	2	8	2	8	2	8	8	8	8	8	8	8	8	8	8	2	8	8	8	8	1	1	1
2015.01.07	A868931504	A8689315	2012	1	1	2	A868	1	2	33	2	2	1	#NULL!	1739.64	1544.68	#NULL!	#NULL!	1190.76	1491.27	#NULL!	#NULL!	#NULL!	#NULL!	501	1	8	8	8	8	8	8	8	8	8	8	8	8	8	8	8	8	8	8	8	8	8	8	8
2015.01.07	A868931801	A8689318	2012	1	1	2	A868	1	46	#NULL!	4	4	4	1	1739.64	2579.68	3633.79	#NULL!	3753.83	4822.73	#NULL!	4663.18	#NULL!	#NULL!	501	1	1	2	2	8	2	8	2	8	8	2	8	1	8	2	8	2	8	8	8	8	1	1	1
2015.01.07	A868931802	A8689318	2012	1	1	2	A868	2	46	#NULL!	4	4	4	2	1739.64	2271.1	2726.81	#NULL!	2140.67	2377.09	#NULL!	2622.21	#NULL!	#NULL!	501	1	2	8	2	8	2	8	2	8	8	1	2	1	8	2	8	2	8	8	8	8	1	1	1
2015.01.07	A868931803	A8689318	2012	1	1	2	A868	2	16	#NULL!	4	4	2	7	1739.64	2557.39	#NULL!	9744.73	2278.71	3537.39	#NULL!	#NULL!	11099.5	#NULL!	501	1	2	8	2	8	2	8	8	8	8	8	8	1	8	2	8	2	8	8	8	8	1	1	1
2015.01.07	A868931804	A8689318	2012	1	1	2	A868	1	11	#NULL!	4	4	1	#NULL!	1739.64	1565.92	#NULL!	#NULL!	1366.15	2005.94	#NULL!	#NULL!	#NULL!	#NULL!	501	1	1	2	2	8	2	8	8	8	8	8	8	8	8	8	8	1	1	1	1	2	1	1	1
2015.01.07	A868932401	A8689324	2012	1	1	2	A868	1	84	#NULL!	4	2	4	7	1739.64	912.18	#NULL!	#NULL!	845.016	978.139	#NULL!	#NULL!	#NULL!	#NULL!	501	1	2	8	2	8	1	2	2	8	8	2	8	1	8	2	8	2	8	8	8	8	1	1	1
2015.01.07	A869910501	A8699105	2012	1	1	1	A869	1	69	#NULL!	3	2	1	5	6921.31	4493.08	6240.6	#NULL!	4756.31	4619.67	#NULL!	5984.53	#NULL!	#NULL!	512	1	2	8	2	8	2	8	2	8	8	2	8	3	3	2	8	2	8	8	8	8	1	1	1
2015.01.07	A869910502	A8699105	2012	1	1	1	A869	2	66	#NULL!	3	2	1	2	6921.31	3351.02	4687.51	16797.8	3465.42	3572.94	27068.1	4448.08	19486.3	25513.4	512	1	2	8	2	8	2	8	2	8	8	2	8	1	8	2	8	2	8	8	8	8	1	1	1
2015.01.07	A869911701	A8699117	2012	1	1	1	A869	2	52	#NULL!	3	4	2	3	6921.31	5696.11	8768.97	#NULL!	8266.15	10108.8	#NULL!	8876.98	#NULL!	#NULL!	512	1	2	8	2	8	1	2	2	8	8	2	8	2	3	2	8	1	2	1	1	2	1	1	1
2015.01.07	A869911702	A8699117	2012	1	1	1	A869	2	26	#NULL!	3	4	4	1	6921.31	8022.74	#NULL!	38944	#NULL!	#NULL!	#NULL!	#NULL!	#NULL!	#NULL!	512	1	2	8	2	8	2	8	8	8	8	2	8	1	8	1	1	1	2	1	1	2	1	1	1
2015.01.07	A869911703	A8699117	2012	1	1	1	A869	1	24	#NULL!	4	4	3	3	6921.31	21593.9	#NULL!	#NULL!	30402.6	29528.7	#NULL!	#NULL!	#NULL!	#NULL!	512	1	2	8	2	8	1	2	8	8	8	2	8	2	3	2	8	2	8	8	8	8	1	1	1
2015.01.07	A869912601	A8699126	2012	1	1	1	A869	2	75	#NULL!	2	1	1	7	6921.31	4819.74	#NULL!	#NULL!	4080.72	4203.86	#NULL!	#NULL!	#NULL!	#NULL!	512	1	2	8	2	8	2	8	2	8	8	2	8	1	8	2	8	2	8	8	8	8	1	1	1
2015.01.07	A869915002	A8699150	2012	1	1	1	A869	2	54	#NULL!	2	3	2	6	6921.31	5696.11	#NULL!	14343.4	5510.77	6739.18	#NULL!	#NULL!	17452.4	#NULL!	512	1	2	8	2	8	1	2	2	8	8	2	8	2	3	1	2	2	8	8	8	8	1	1	1
2015.01.07	A869915601	A8699156	2012	1	1	1	A869	2	77	#NULL!	2	1	#NULL!	#NULL!	6921.31	4819.74	#NULL!	#NULL!	4080.72	4203.86	#NULL!	#NULL!	#NULL!	#NULL!	512	1	2	8	2	8	2	8	1	2	1	2	8	1	8	1	1	2	8	8	8	8	1	1	1
2015.01.07	A869916801	A8699168	2012	1	1	1	A869	2	42	#NULL!	3	3	4	2	6921.31	5605.83	10729.8	#NULL!	5512.31	8193.82	#NULL!	9775.83	#NULL!	#NULL!	512	1	2	8	2	8	2	8	2	8	8	2	8	1	8	2	8	2	8	8	8	8	1	1	1
2015.01.07	A869918001	A8699180	2012	1	1	1	A869	2	52	#NULL!	2	3	3	6	6921.31	5696.11	#NULL!	#NULL!	5510.77	6739.18	#NULL!	#NULL!	#NULL!	#NULL!	512	1	2	8	2	8	2	8	2	8	8	2	8	1	8	2	8	1	1	1	1	2	1	2	1
2015.01.07	A869920101	A8699201	2012	1	1	1	A869	1	69	#NULL!	4	4	2	6	6921.31	4493.08	6240.6	24409.9	7134.46	6929.5	34362.7	5984.53	28693.5	33723.8	512	1	2	8	2	8	2	8	2	8	8	2	8	1	8	2	8	2	8	8	8	8	1	1	1
2015.01.07	A869920102	A8699201	2012	1	1	1	A869	2	67	#NULL!	4	4	1	7	6921.31	3351.02	4687.51	#NULL!	5198.12	5359.41	#NULL!	4448.08	#NULL!	#NULL!	512	1	2	8	2	8	2	8	2	8	8	2	8	1	8	2	8	2	8	8	8	8	1	1	1
2015.01.07	A869920103	A8699201	2012	1	1	1	A869	1	39	#NULL!	4	4	#NULL!	#NULL!	6921.31	9150.37	#NULL!	#NULL!	#NULL!	#NULL!	#NULL!	#NULL!	#NULL!	#NULL!	512	1	1	2	2	8	2	8	8	8	8	2	8	1	8	2	8	2	8	8	8	8	1	1	1
2015.01.07	A869921301	A8699213	2012	1	1	1	A869	2	64	#NULL!	2	2	1	7	6921.31	5235.28	5575.87	#NULL!	4817.84	4266.08	#NULL!	5421.43	#NULL!	#NULL!	512	1	2	8	2	8	2	8	2	8	8	2	8	2	3	2	8	2	8	8	8	8	1	1	1
2015.01.07	A869922502	A8699225	2012	1	1	1	A869	2	49	#NULL!	1	2	1	6	6921.31	17612	24267.1	#NULL!	17033.7	18914.9	#NULL!	23336.3	#NULL!	#NULL!	512	1	2	8	1	2	2	8	1	2	2	2	8	1	8	2	8	2	8	8	8	8	1	1	1
2015.01.07	A869922801	A8699228	2012	1	1	1	A869	1	42	#NULL!	2	3	4	1	6921.31	11367.5	28818.3	#NULL!	12868.7	22463.2	#NULL!	31802.5	#NULL!	#NULL!	512	1	2	8	2	8	1	2	2	8	8	2	8	1	8	2	8	2	8	8	8	8	1	1	1
2015.01.07	A869922802	A8699228	2012	1	1	1	A869	2	44	#NULL!	2	3	3	6	6921.31	5605.83	16094.7	51364.7	5512.31	8193.82	78057.4	14663.8	66990.4	86179.3	512	1	1	2	2	8	2	8	2	8	8	2	8	1	8	2	8	1	1	1	1	2	1	1	1
2015.01.07	A869922803	A8699228	2012	1	1	1	A869	1	10	#NULL!	2	3	1	#NULL!	6921.31	7787.64	#NULL!	#NULL!	3963.27	7980.79	#NULL!	#NULL!	#NULL!	#NULL!	512	1	2	8	2	8	2	8	8	8	8	8	8	8	8	8	8	2	8	8	8	8	1	1	1
2015.01.07	A869922804	A8699228	2012	1	1	1	A869	2	73	#NULL!	4	3	1	6	6921.31	4979.77	#NULL!	#NULL!	4523.97	4203.86	#NULL!	#NULL!	#NULL!	#NULL!	512	1	2	8	2	8	2	8	2	8	8	2	8	2	3	2	8	2	8	8	8	8	1	1	1
2015.01.07	A869924901	A8699249	2012	1	1	1	A869	2	65	#NULL!	2	1	1	6	6921.31	3351.02	4687.51	#NULL!	3465.42	3572.94	#NULL!	4448.08	#NULL!	#NULL!	512	1	2	8	2	8	1	1	2	8	8	2	8	1	8	1	2	2	8	8	8	8	1	1	1
2015.01.07	A869928502	A8699285	2012	1	1	1	A869	2	51	#NULL!	1	2	2	6	6921.31	7594.82	17537.9	#NULL!	7347.69	8985.57	#NULL!	17754	#NULL!	#NULL!	512	1	2	8	2	8	2	8	2	8	8	2	8	1	8	2	8	2	8	8	8	8	1	1	1
2015.01.07	A869928503	A8699285	2012	1	1	1	A869	1	24	#NULL!	1	2	3	2	6921.31	21593.9	#NULL!	#NULL!	30402.6	29528.7	#NULL!	#NULL!	#NULL!	#NULL!	512	1	2	8	2	8	2	8	8	8	8	2	8	1	8	2	8	2	8	8	8	8	1	1	1
2015.01.07	A869928504	A8699285	2012	1	1	1	A869	1	21	#NULL!	1	2	4	3	6921.31	21593.9	#NULL!	60115.7	30402.6	29528.7	#NULL!	#NULL!	72623	#NULL!	512	1	2	8	2	8	2	8	8	8	8	2	8	1	8	2	8	2	8	8	8	8	1	1	1
2015.01.07	A869930001	A8699300	2012	1	1	1	A869	2	36	#NULL!	2	3	3	2	6921.31	5947.77	#NULL!	17003.1	5894.9	8306.55	#NULL!	#NULL!	17606.9	#NULL!	512	1	2	8	2	8	2	8	8	8	8	2	8	1	8	2	8	2	8	8	8	8	1	1	1
2015.01.07	A869932401	A8699324	2012	1	1	1	A869	2	69	#NULL!	2	1	1	7	6921.31	3351.02	4687.51	#NULL!	3465.42	3572.94	#NULL!	4448.08	#NULL!	#NULL!	512	1	2	8	2	8	2	8	1	2	2	2	8	1	8	1	1	2	8	8	8	8	1	1	1
2015.01.07	A870909301	A8709093	2012	1	1	1	A870	1	47	#NULL!	1	2	4	1	6576.81	9752.59	23720.7	#NULL!	17232.6	22139.5	#NULL!	30758.8	#NULL!	#NULL!	512	1	2	8	2	8	2	8	1	1	2	2	8	1	8	2	8	2	8	8	8	8	1	1	1
2015.01.07	A870909302	A8709093	2012	1	1	1	A870	2	42	#NULL!	1	2	4	3	6576.81	5326.81	15740.7	21511.7	6360.36	9454.41	47235.2	23902.2	17346.5	63213.2	512	1	2	8	2	8	2	8	1	2	2	2	8	1	8	2	8	1	2	1	2	2	1	1	1
2015.01.07	A870909303	A8709093	2012	1	1	1	A870	1	11	#NULL!	2	2	1	#NULL!	6576.81	4414.05	#NULL!	14653.7	4492.78	9208.61	#NULL!	#NULL!	11455.8	#NULL!	512	1	2	8	2	8	2	8	8	8	8	8	8	8	8	8	8	1	2	1	2	2	1	2	1
2015.01.07	A870909304	A8709093	2012	1	1	1	A870	1	8	#NULL!	1	2	1	#NULL!	6576.81	4200.93	#NULL!	#NULL!	4347.42	7184.96	#NULL!	#NULL!	#NULL!	#NULL!	512	1	2	8	2	8	2	8	8	8	8	8	8	8	8	8	8	2	8	8	8	8	1	1	1
2015.01.07	A870909601	A8709096	2012	1	1	1	A870	1	79	#NULL!	1	1	#NULL!	#NULL!	6576.81	3448.54	#NULL!	#NULL!	3879.18	4490.31	#NULL!	#NULL!	#NULL!	#NULL!	512	1	2	8	2	8	2	8	2	8	8	2	8	3	1	1	1	2	8	8	8	8	1	1	1
2015.01.07	A870909602	A8709096	2012	1	1	1	A870	2	67	#NULL!	1	1	#NULL!	#NULL!	6576.81	3184.23	#NULL!	10552.5	3998.56	4122.62	#NULL!	#NULL!	12591.2	#NULL!	512	1	1	2	2	8	2	8	1	1	2	2	8	1	8	1	1	1	2	1	1	2	1	1	1
2015.01.07	A870911401	A8709114	2012	1	1	1	A870	1	61	#NULL!	4	4	3	3	6576.81	6760.26	10176.5	5718.16	#NULL!	#NULL!	11923.3	#NULL!	#NULL!	#NULL!	512	1	2	8	2	8	2	8	2	8	8	2	8	1	8	2	8	2	8	8	8	8	1	1	1
2015.01.07	A870911402	A8709114	2012	1	1	1	A870	2	58	#NULL!	4	4	3	7	6576.81	4876.89	10049.6	8857.82	#NULL!	#NULL!	18216.2	#NULL!	#NULL!	#NULL!	512	1	2	8	1	2	2	8	2	8	8	2	8	1	8	2	8	1	1	1	1	2	1	1	1
2015.01.07	A870913801	A8709138	2012	1	1	1	A870	2	31	#NULL!	4	4	4	1	6576.81	8113.97	#NULL!	11058	9085.88	11135.8	#NULL!	#NULL!	13587.5	#NULL!	512	1	2	8	2	8	2	8	8	8	8	2	8	2	3	1	1	1	2	2	2	2	1	1	1
2015.01.07	A870914401	A8709144	2012	1	1	1	A870	2	25	#NULL!	2	3	4	3	6576.81	7623.42	#NULL!	8154.93	#NULL!	#NULL!	#NULL!	#NULL!	#NULL!	#NULL!	512	1	1	2	1	1	2	8	8	8	8	2	8	1	8	1	1	1	1	1	1	2	1	2	1
2015.01.07	A870915001	A8709150	2012	1	1	1	A870	2	71	#NULL!	3	2	2	6	6576.81	4731.91	#NULL!	#NULL!	5219.97	4850.6	#NULL!	#NULL!	#NULL!	#NULL!	512	1	2	8	2	8	2	8	2	8	8	2	8	1	8	2	8	2	8	8	8	8	1	1	1
2015.01.07	A870915601	A8709156	2012	1	1	1	A870	1	49	#NULL!	1	2	3	5	6576.81	9752.59	#NULL!	10892.9	17232.6	22139.5	#NULL!	#NULL!	14857.7	#NULL!	512	1	2	8	2	8	2	8	2	8	8	2	8	1	8	2	8	2	8	8	8	8	1	1	1
2015.01.07	A870915901	A8709159	2012	1	1	1	A870	1	54	#NULL!	1	1	3	6	6576.81	12606.3	21552.2	16662.4	14496.9	16286.4	43488.3	30637.8	26185.5	65253.5	512	1	2	8	2	8	2	8	1	3	2	2	8	1	8	2	8	2	8	8	8	8	1	1	1
2015.01.07	A870915902	A8709159	2012	1	1	1	A870	2	50	#NULL!	1	1	3	7	6576.81	5412.6	12864.2	#NULL!	6358.58	7775.97	#NULL!	21704.4	#NULL!	#NULL!	512	1	2	8	2	8	2	8	2	8	8	2	8	1	8	2	8	2	8	8	8	8	1	1	1
2015.01.07	A870915903	A8709159	2012	1	1	1	A870	2	19	#NULL!	1	1	3	3	6576.81	8056.94	#NULL!	21746.1	10460.8	16239	#NULL!	#NULL!	21797	#NULL!	512	1	2	8	1	2	1	2	8	8	8	2	8	1	8	1	1	1	2	1	1	2	1	1	1
2015.01.07	A870915904	A8709159	2012	1	1	1	A870	1	18	#NULL!	1	1	2	7	6576.81	9972.39	#NULL!	#NULL!	11111.5	16416.7	#NULL!	#NULL!	#NULL!	#NULL!	512	1	2	8	2	8	2	8	8	8	8	8	8	1	8	2	8	2	8	8	8	8	1	1	1
2015.01.07	A870916201	A8709162	2012	1	1	1	A870	1	29	#NULL!	2	2	3	1	6576.81	11567.2	#NULL!	17093.2	17816	26219.3	#NULL!	#NULL!	27671.6	#NULL!	512	1	2	8	2	8	2	8	8	8	8	2	8	1	8	2	8	2	8	8	8	8	1	1	1
2015.01.07	A870916202	A8709162	2012	1	1	1	A870	2	26	#NULL!	1	2	3	1	6576.81	7623.42	#NULL!	#NULL!	9558.71	12832.6	#NULL!	#NULL!	#NULL!	#NULL!	512	1	2	8	1	2	1	2	8	8	8	2	8	1	8	2	8	1	2	1	1	2	1	1	1
2015.01.07	A870918901	A8709189	2012	1	1	1	A870	1	61	#NULL!	#NULL!	#NULL!	4	1	6576.81	6760.26	10176.5	#NULL!	#NULL!	#NULL!	#NULL!	#NULL!	#NULL!	#NULL!	512	1	2	8	2	8	2	8	2	8	8	2	8	1	8	2	8	2	8	8	8	8	1	1	1
2015.01.07	A870918902	A8709189	2012	1	1	1	A870	2	54	#NULL!	#NULL!	#NULL!	2	7	6576.81	5412.6	12864.2	#NULL!	#NULL!	#NULL!	#NULL!	#NULL!	#NULL!	#NULL!	512	1	2	8	2	8	2	8	2	8	8	2	8	1	8	2	8	1	2	1	1	2	1	1	1
2015.01.07	A870921001	A8709210	2012	1	1	1	A870	2	22	#NULL!	3	3	3	1	6576.81	7077.38	#NULL!	#NULL!	8324.3	13399.6	#NULL!	#NULL!	#NULL!	#NULL!	512	1	1	2	1	2	2	8	8	8	8	2	8	1	8	2	8	1	2	1	1	1	1	1	1
2015.01.07	A870923401	A8709234	2012	1	1	1	A870	2	77	#NULL!	3	2	1	7	6576.81	4579.84	#NULL!	#NULL!	4708.52	4850.6	#NULL!	#NULL!	#NULL!	#NULL!	512	1	2	8	2	8	2	8	2	8	8	2	8	3	1	2	8	2	8	8	8	8	1	1	1
2015.01.07	A870926401	A8709264	2012	1	1	1	A870	1	34	#NULL!	1	2	4	7	6576.81	16372.2	#NULL!	15780.7	19906.8	24829.6	#NULL!	#NULL!	23088.7	#NULL!	512	1	2	8	2	8	2	8	8	8	8	2	8	1	8	2	8	2	8	8	8	8	1	1	1
2015.01.07	A870929701	A8709297	2012	1	1	1	A870	1	28	#NULL!	3	3	4	1	6576.81	11567.2	#NULL!	17093.2	17816	26219.3	#NULL!	#NULL!	27671.6	#NULL!	512	1	2	8	2	8	2	8	8	8	8	2	8	1	8	2	8	2	8	8	8	8	1	1	1
2015.01.07	A870929702	A8709297	2012	1	1	1	A870	2	28	#NULL!	3	3	4	7	6576.81	7623.42	#NULL!	#NULL!	9558.71	12832.6	#NULL!	#NULL!	#NULL!	#NULL!	512	1	1	2	2	8	2	8	8	8	8	2	8	1	8	1	1	2	8	8	8	8	1	1	1
2015.01.07	A870930301	A8709303	2012	1	1	1	A870	2	73	#NULL!	2	1	1	7	6576.81	4731.91	10396.9	#NULL!	5219.97	4850.6	#NULL!	16327.7	#NULL!	#NULL!	512	1	2	8	2	8	2	8	2	8	8	2	8	1	8	2	8	2	8	8	8	8	1	1	1
2015.01.07	A870930302	A8709303	2012	1	1	1	A870	2	21	#NULL!	1	1	3	7	6576.81	7077.38	#NULL!	17850.4	8324.3	13399.6	#NULL!	#NULL!	21652.5	#NULL!	512	1	2	8	1	2	1	2	8	8	8	2	8	1	8	2	8	1	1	1	1	1	2	2	1
2015.01.07	A870930901	A8709309	2012	1	1	1	A870	1	39	#NULL!	4	4	4	1	6576.81	8694.92	#NULL!	32838.6	10327.4	17265.5	#NULL!	#NULL!	42292	#NULL!	512	1	2	8	2	8	2	8	8	8	8	2	8	1	8	1	2	2	8	8	8	8	1	1	1
2015.01.07	A870930902	A8709309	2012	1	1	1	A870	1	38	#NULL!	4	4	4	1	6576.81	8694.92	#NULL!	#NULL!	10327.4	17265.5	#NULL!	#NULL!	#NULL!	#NULL!	512	1	2	8	2	8	2	8	8	8	8	2	8	1	8	2	8	2	8	8	8	8	1	1	1
2015.01.07	A870930903	A8709309	2012	1	1	1	A870	1	35	#NULL!	4	4	4	1	6576.81	8694.92	#NULL!	#NULL!	10327.4	17265.5	#NULL!	#NULL!	#NULL!	#NULL!	512	1	1	2	2	8	2	8	8	8	8	2	8	1	8	2	8	2	8	8	8	8	1	1	1
2015.01.07	A870932101	A8709321	2012	1	1	1	A870	2	79	#NULL!	2	1	1	6	6576.81	4579.84	#NULL!	#NULL!	4708.52	4850.6	#NULL!	#NULL!	#NULL!	#NULL!	512	1	2	8	2	8	2	8	2	8	8	2	8	2	3	2	8	1	2	2	2	2	1	2	1
2015.01.07	A871909601	A8719096	2012	1	1	2	A871	1	45	#NULL!	2	3	3	1	2169.98	3217.81	3987.08	#NULL!	4682.41	6015.72	#NULL!	5417.52	#NULL!	#NULL!	501	1	2	8	2	8	2	8	2	8	8	2	8	1	8	1	2	2	8	8	8	8	1	1	1
2015.01.07	A871909602	A8719096	2012	1	1	2	A871	2	44	#NULL!	2	3	4	1	2169.98	1757.55	2645.77	#NULL!	1728.23	2568.94	#NULL!	2552.34	#NULL!	#NULL!	501	1	2	8	2	8	2	8	2	8	8	1	2	1	8	2	8	2	8	8	8	8	1	1	1
2015.01.07	A871909603	A8719096	2012	1	1	2	A871	1	6	81	3	3	1	#NULL!	2169.98	1471.68	#NULL!	#NULL!	1523	1952.29	#NULL!	#NULL!	#NULL!	#NULL!	501	1	2	8	2	8	2	8	8	8	8	8	8	8	8	8	8	2	8	8	8	8	1	1	1
2015.01.07	A871909604	A8719096	2012	1	1	2	A871	2	4	56	3	3	1	#NULL!	2169.98	2349	#NULL!	#NULL!	2137.26	2490.27	#NULL!	#NULL!	#NULL!	#NULL!	501	1	2	8	2	8	2	8	8	8	8	8	8	8	8	8	8	8	8	8	8	8	8	8	8
2015.01.07	A871909901	A8719099	2012	1	1	2	A871	1	72	#NULL!	3	3	3	7	2169.98	1098.63	1534.36	#NULL!	1077.25	1220.1	#NULL!	1613.63	#NULL!	#NULL!	501	1	2	8	2	8	2	8	2	8	8	2	8	2	3	2	8	2	8	8	8	8	1	1	1
2015.01.07	A871909902	A8719099	2012	1	1	2	A871	2	73	#NULL!	4	3	1	7	2169.98	1561.26	1747.56	#NULL!	1418.36	1318	#NULL!	1743.52	#NULL!	#NULL!	501	1	2	8	2	8	2	8	2	8	8	2	8	1	8	2	8	2	8	8	8	8	1	1	1
2015.01.07	A871913503	A8719135	2012	1	1	2	A871	2	5	66	#NULL!	#NULL!	#NULL!	#NULL!	2169.98	2196.72	#NULL!	#NULL!	2099.85	3338.73	#NULL!	#NULL!	#NULL!	#NULL!	501	1	2	8	2	8	2	8	8	8	8	8	8	8	8	8	8	8	8	8	8	8	8	8	8
2015.01.07	A871913504	A8719135	2012	1	1	2	A871	2	3	43	#NULL!	#NULL!	#NULL!	#NULL!	2169.98	2349	#NULL!	#NULL!	2137.26	3320.36	#NULL!	#NULL!	#NULL!	#NULL!	501	1	8	8	8	8	8	8	8	8	8	8	8	8	8	8	8	8	8	8	8	8	8	8	8
2015.01.07	A871917101	A8719171	2012	1	1	2	A871	1	67	#NULL!	4	4	4	1	2169.98	1408.68	1538.82	7539.63	#NULL!	#NULL!	6536.5	#NULL!	#NULL!	#NULL!	501	1	2	8	2	8	2	8	2	8	8	1	2	2	3	2	8	2	8	8	8	8	1	1	1
2015.01.07	A871917102	A8719171	2012	1	1	2	A871	2	62	#NULL!	4	4	4	7	2169.98	1641.37	1374.91	#NULL!	3020.99	2675.02	#NULL!	2830.93	#NULL!	#NULL!	501	1	2	8	2	8	2	8	2	8	8	2	8	1	8	2	8	2	8	8	8	8	1	1	1
2015.01.07	A871917103	A8719171	2012	1	1	2	A871	2	38	#NULL!	4	4	#NULL!	#NULL!	2169.98	1864.75	#NULL!	#NULL!	3696.35	5208.56	#NULL!	#NULL!	#NULL!	#NULL!	501	1	2	8	2	8	2	8	8	8	8	2	8	4	3	2	8	2	8	8	8	8	1	1	1
2015.01.07	A871917104	A8719171	2012	1	1	2	A871	1	34	#NULL!	4	4	4	2	2169.98	5401.92	#NULL!	#NULL!	#NULL!	#NULL!	#NULL!	#NULL!	#NULL!	#NULL!	501	1	2	8	2	8	2	8	8	8	8	2	8	1	8	2	8	2	8	8	8	8	1	1	1
2015.01.07	A871917701	A8719177	2012	1	1	2	A871	1	69	#NULL!	4	4	2	5	2169.98	1408.68	1538.82	#NULL!	1491.2	1448.36	#NULL!	1562.48	#NULL!	#NULL!	501	1	2	8	2	8	2	8	2	8	8	2	8	2	3	2	8	2	8	8	8	8	1	1	1
2015.01.07	A871917702	A8719177	2012	1	1	2	A871	2	67	#NULL!	4	4	1	7	2169.98	1050.62	1155.86	#NULL!	1086.48	1120.19	#NULL!	1161.34	#NULL!	#NULL!	501	1	2	8	2	8	2	8	2	8	8	2	8	1	8	1	2	2	8	8	8	8	1	1	1
2015.01.07	A871917703	A8719177	2012	1	1	2	A871	1	37	#NULL!	4	4	4	2	2169.98	2868.84	#NULL!	16146.1	2806.14	4691.35	#NULL!	#NULL!	20794.2	#NULL!	501	1	2	8	2	8	2	8	8	8	8	2	8	1	8	2	8	2	8	8	8	8	1	1	1
2015.01.07	A871917704	A8719177	2012	1	1	2	A871	2	30	#NULL!	4	4	3	3	2169.98	2677.15	#NULL!	#NULL!	2468.8	3025.79	#NULL!	#NULL!	#NULL!	#NULL!	501	1	2	8	2	8	2	8	8	8	8	2	8	1	8	2	8	1	2	1	1	2	1	1	1
2015.01.07	A871917705	A8719177	2012	1	1	2	A871	2	5	63	4	4	1	#NULL!	2169.98	2196.72	#NULL!	#NULL!	2099.85	2504.05	#NULL!	#NULL!	#NULL!	#NULL!	501	1	2	8	2	8	1	2	8	8	8	8	8	8	8	8	8	8	8	8	8	8	8	8	8
2015.01.07	A871918001	A8719180	2012	1	1	2	A871	1	66	#NULL!	4	4	4	7	2169.98	1408.68	1538.82	5654.73	1491.2	1448.36	6536.5	1562.48	6836.99	7484.11	501	1	2	8	2	8	2	8	2	8	8	2	8	1	8	2	8	2	8	8	8	8	1	1	1
2015.01.07	A871918002	A8719180	2012	1	1	2	A871	2	63	#NULL!	4	4	4	7	2169.98	1641.37	1374.91	#NULL!	1510.5	1337.51	#NULL!	1415.46	#NULL!	#NULL!	501	1	2	8	2	8	2	8	2	8	8	2	8	1	8	2	8	2	8	8	8	8	1	1	1
2015.01.07	A871918003	A8719180	2012	1	1	2	A871	1	39	#NULL!	4	4	4	7	2169.98	2868.84	#NULL!	#NULL!	2806.14	4691.35	#NULL!	#NULL!	#NULL!	#NULL!	501	1	2	8	2	8	2	8	8	8	8	2	8	1	8	2	8	2	8	8	8	8	1	1	1
2015.01.07	A871918601	A8719186	2012	1	1	2	A871	1	49	#NULL!	3	4	3	3	2169.98	3217.81	7974.15	#NULL!	#NULL!	#NULL!	#NULL!	#NULL!	#NULL!	#NULL!	501	1	2	8	2	8	2	8	2	8	8	2	8	1	8	2	8	2	8	8	8	8	1	1	1
2015.01.07	A871918602	A8719186	2012	1	1	2	A871	2	47	#NULL!	3	4	3	2	2169.98	2832.9	#NULL!	#NULL!	8010.62	8895.33	#NULL!	#NULL!	#NULL!	#NULL!	501	1	2	8	2	8	2	8	2	8	8	1	2	1	8	2	8	2	8	8	8	8	1	1	1
2015.01.07	A871918603	A8719186	2012	1	1	2	A871	2	21	#NULL!	3	4	3	1	2169.98	2335.14	#NULL!	#NULL!	#NULL!	#NULL!	#NULL!	#NULL!	#NULL!	#NULL!	501	1	2	8	1	2	2	8	8	8	8	2	8	1	8	1	2	1	1	1	1	2	1	1	1
2015.01.07	A871918901	A8719189	2012	1	1	2	A871	1	55	#NULL!	4	4	3	2	2169.98	2986.56	#NULL!	5493.75	2885.57	2784.5	#NULL!	#NULL!	6578.13	#NULL!	501	1	2	8	2	8	2	8	2	8	8	2	8	1	8	2	8	1	2	1	1	2	1	1	1
2015.01.07	A871918902	A8719189	2012	1	1	2	A871	2	58	#NULL!	4	4	4	7	2169.98	1609.1	3378.37	#NULL!	1707.24	1769.74	#NULL!	3584.55	#NULL!	#NULL!	501	1	2	8	2	8	2	8	1	2	2	2	8	1	8	2	8	1	1	1	1	2	2	1	1
2015.01.07	A871918903	A8719189	2012	1	1	2	A871	2	35	#NULL!	4	4	4	1	2169.98	1864.75	#NULL!	7877.81	1848.18	2604.28	#NULL!	#NULL!	8390.61	#NULL!	501	1	2	8	2	8	2	8	8	8	8	2	8	1	8	2	8	2	8	8	8	8	1	1	1
2015.01.07	A871918904	A8719189	2012	1	1	2	A871	1	35	#NULL!	4	4	4	2	2169.98	2868.84	#NULL!	#NULL!	2806.14	4691.35	#NULL!	#NULL!	#NULL!	#NULL!	501	1	2	8	2	8	2	8	8	8	8	2	8	1	8	2	8	1	1	1	1	2	1	1	1
2015.01.07	A871918905	A8719189	2012	1	1	2	A871	1	1	15	4	4	1	#NULL!	2169.98	1525.37	#NULL!	#NULL!	1567.84	1860.16	#NULL!	#NULL!	#NULL!	#NULL!	501	1	8	8	8	8	8	8	8	8	8	8	8	8	8	8	8	8	8	8	8	8	8	8	8
2015.01.07	A871919501	A8719195	2012	1	1	2	A871	1	70	#NULL!	4	3	3	7	2169.98	1098.63	1534.36	#NULL!	1615.88	1830.15	#NULL!	1613.63	#NULL!	#NULL!	501	1	2	8	2	8	2	8	2	8	8	2	8	1	8	1	2	1	2	1	1	2	1	1	1
2015.01.07	A871919502	A8719195	2012	1	1	2	A871	2	67	#NULL!	3	3	1	7	2169.98	1050.62	1155.86	#NULL!	1629.72	1680.29	#NULL!	1161.34	#NULL!	#NULL!	501	1	2	8	2	8	2	8	2	8	8	2	8	1	8	1	2	1	1	1	1	2	1	1	1
2015.01.07	A871919503	A8719195	2012	1	1	2	A871	1	34	#NULL!	2	3	4	3	2169.98	5401.92	#NULL!	17457.9	#NULL!	#NULL!	#NULL!	#NULL!	#NULL!	#NULL!	501	1	2	8	2	8	2	8	8	8	8	2	8	1	8	2	8	2	8	8	8	8	1	1	1
2015.01.07	A871920702	A8719207	2012	1	1	2	A871	2	41	#NULL!	3	3	4	2	2169.98	2636.32	3968.65	11899	1728.23	3211.17	18374.2	3828.51	10661.2	19125.2	501	1	2	8	2	8	2	8	2	8	8	2	8	1	8	2	8	1	2	1	1	2	1	1	1
2015.01.07	A871920703	A8719207	2012	1	1	2	A871	1	16	#NULL!	3	3	2	7	2169.98	6987.11	#NULL!	12768.4	3019.2	5575.91	#NULL!	#NULL!	12140.4	#NULL!	501	1	1	2	2	8	2	8	8	8	8	8	8	1	8	2	8	2	8	8	8	8	1	1	1
2015.01.07	A871920704	A8719207	2012	1	1	2	A871	2	11	#NULL!	3	3	1	#NULL!	2169.98	1674.49	#NULL!	#NULL!	1424.81	2785.96	#NULL!	#NULL!	#NULL!	#NULL!	501	1	2	8	2	8	2	8	8	8	8	8	8	8	8	8	8	1	1	1	1	2	1	1	1
2015.01.07	A871920705	A8719207	2012	1	1	2	A871	2	67	#NULL!	4	3	4	7	2169.98	1575.93	1733.78	#NULL!	1086.48	1400.24	#NULL!	1742	#NULL!	#NULL!	501	1	2	8	2	8	2	8	2	8	8	2	8	1	8	2	8	2	8	8	8	8	1	1	1
2015.01.07	A871921001	A8719210	2012	1	1	2	A871	1	59	#NULL!	1	1	4	7	2169.98	2986.56	2494.59	#NULL!	2885.57	2784.5	#NULL!	2729.71	#NULL!	#NULL!	501	1	2	8	2	8	2	8	2	8	8	2	8	1	8	2	8	2	8	8	8	8	1	1	1
2015.01.07	A871921002	A8719210	2012	1	1	2	A871	2	60	#NULL!	1	1	4	7	2169.98	1641.37	1374.91	#NULL!	1510.5	1337.51	#NULL!	1415.46	#NULL!	#NULL!	501	1	2	8	2	8	2	8	1	2	2	2	8	2	3	2	8	2	8	8	8	8	1	1	1
2015.01.07	A871921901	A8719219	2012	1	1	2	A871	1	70	#NULL!	4	4	3	1	2169.98	1098.63	1534.36	#NULL!	1077.25	1220.1	#NULL!	1613.63	#NULL!	#NULL!	501	1	2	8	1	2	2	8	2	8	8	2	8	1	8	1	2	1	1	1	1	2	1	2	1
2015.01.07	A871921902	A8719219	2012	1	1	2	A871	2	65	#NULL!	4	4	3	7	2169.98	1050.62	1155.86	4864.18	1086.48	1120.19	5148.9	1161.34	5803.92	5662.04	501	1	1	1	2	8	2	8	2	8	8	2	8	1	8	1	2	2	8	8	8	8	2	1	1
2015.01.07	A871921903	A8719219	2012	1	1	2	A871	2	38	#NULL!	4	4	4	6	2169.98	1864.75	#NULL!	#NULL!	1848.18	2604.28	#NULL!	#NULL!	#NULL!	#NULL!	501	1	2	8	1	2	2	8	8	8	8	2	8	1	8	2	8	1	1	1	1	2	1	1	1
2015.01.07	A871921904	A8719219	2012	1	1	2	A871	1	36	#NULL!	4	4	4	3	2169.98	2868.84	#NULL!	#NULL!	2806.14	4691.35	#NULL!	#NULL!	#NULL!	#NULL!	501	1	1	2	2	8	2	8	8	8	8	2	8	1	8	1	1	2	8	8	8	8	1	1	1
2015.01.07	A871921905	A8719219	2012	1	1	2	A871	2	8	#NULL!	4	4	1	#NULL!	2169.98	2196.72	#NULL!	#NULL!	2099.85	2504.05	#NULL!	#NULL!	#NULL!	#NULL!	501	1	1	2	2	8	2	8	8	8	8	8	8	8	8	8	8	2	8	8	8	8	1	1	1
2015.01.07	A871921906	A8719219	2012	1	1	2	A871	2	1	16	4	4	1	#NULL!	2169.98	2349	#NULL!	#NULL!	2137.26	2490.27	#NULL!	#NULL!	#NULL!	#NULL!	501	1	8	8	8	8	8	8	8	8	8	8	8	8	8	8	8	8	8	8	8	8	8	8	8
2015.01.07	A871921907	A8719219	2012	1	1	2	A871	1	27	#NULL!	3	4	4	2	2169.98	3816.52	#NULL!	7879.12	4840.93	7895.51	#NULL!	#NULL!	12755.3	#NULL!	501	1	2	8	1	2	2	8	8	8	8	2	8	1	8	2	8	1	2	1	1	2	2	1	1
2015.01.07	A871922502	A8719225	2012	1	1	2	A871	2	48	#NULL!	3	4	3	7	2169.98	2832.9	2991.91	6221.57	2670.21	2965.11	12774.5	3046.4	6807.25	14891.6	501	1	2	8	2	8	2	8	2	8	8	2	8	1	8	2	8	2	8	8	8	8	1	1	1
2015.01.07	A871925502	A8719255	2012	1	1	2	A871	2	54	#NULL!	4	4	4	7	2169.98	3571.71	2162.27	6645.51	3455.49	4225.75	5025.58	2317.66	8316.98	6010.89	501	1	2	8	2	8	2	8	2	8	8	2	8	1	8	2	8	2	8	8	8	8	1	1	1
2015.01.07	A871926101	A8719261	2012	1	1	2	A871	1	54	#NULL!	4	4	#NULL!	#NULL!	2169.98	5545.85	#NULL!	#NULL!	#NULL!	#NULL!	#NULL!	#NULL!	#NULL!	#NULL!	501	1	2	8	2	8	2	8	2	8	8	2	8	2	3	1	2	2	8	8	8	8	1	1	1
2015.01.07	A871926102	A8719261	2012	1	1	2	A871	2	52	#NULL!	4	4	3	5	2169.98	2381.14	4324.54	#NULL!	2303.66	4225.75	#NULL!	4635.33	#NULL!	#NULL!	501	1	2	8	2	8	2	8	2	8	8	2	8	1	8	2	8	2	8	8	8	8	1	1	1
2015.01.07	A871926104	A8719261	2012	1	1	2	A871	2	26	#NULL!	4	4	4	2	2169.98	3353.74	#NULL!	12028.9	3463.04	6973.71	#NULL!	#NULL!	15675	#NULL!	501	1	2	8	2	8	2	8	8	8	8	2	8	1	8	2	8	2	8	8	8	8	1	1	1
2015.01.07	A871928501	A8719285	2012	1	1	2	A871	1	60	#NULL!	3	3	#NULL!	#NULL!	2169.98	3345.76	1710.51	#NULL!	#NULL!	#NULL!	#NULL!	#NULL!	#NULL!	#NULL!	501	1	2	8	2	8	1	2	2	8	8	2	8	2	3	1	2	2	8	8	8	8	1	1	1
2015.01.07	A871928502	A8719285	2012	1	1	2	A871	2	56	#NULL!	3	3	1	7	2169.98	2413.65	1689.19	#NULL!	5121.72	5309.22	#NULL!	3584.55	#NULL!	#NULL!	501	1	2	8	2	8	2	8	2	8	8	2	8	2	3	2	8	2	8	8	8	8	1	1	1
2015.01.07	A871928801	A8719288	2012	1	1	2	A871	1	52	#NULL!	2	2	4	1	2169.98	4159.39	3622.58	#NULL!	3939.09	4425.32	#NULL!	4417.59	#NULL!	#NULL!	501	1	2	8	2	8	2	8	2	8	8	1	1	2	3	2	8	2	8	8	8	8	1	1	1
2015.01.07	A871928802	A8719288	2012	1	1	2	A871	2	49	#NULL!	2	2	3	7	2169.98	2832.9	2991.91	#NULL!	2670.21	2965.11	#NULL!	3046.4	#NULL!	#NULL!	501	1	2	8	2	8	2	8	2	8	8	2	8	1	8	2	8	2	8	8	8	8	1	1	1
2015.01.07	A871928803	A8719288	2012	1	1	2	A871	1	25	#NULL!	2	2	3	7	2169.98	3816.52	#NULL!	6303.3	4840.93	7895.51	#NULL!	#NULL!	10204.2	#NULL!	501	1	2	8	2	8	2	8	8	8	8	2	8	1	8	2	8	2	8	8	8	8	1	1	1
2015.01.07	A871928804	A8719288	2012	1	1	2	A871	2	22	#NULL!	2	2	3	3	2169.98	2335.14	#NULL!	6582.51	2261.87	3640.93	#NULL!	#NULL!	7984.59	#NULL!	501	1	2	8	2	8	2	8	8	8	8	2	8	1	8	1	2	2	8	8	8	8	1	1	1
2015.01.07	A871930601	A8719306	2012	1	1	2	A871	2	68	#NULL!	3	3	3	7	2169.98	1050.62	1155.86	#NULL!	1086.48	1120.19	#NULL!	1161.34	#NULL!	#NULL!	501	1	2	8	2	8	1	2	2	8	8	2	8	1	8	2	8	2	8	8	8	8	1	1	1
2015.01.07	A871930602	A8719306	2012	1	1	2	A871	1	74	#NULL!	4	3	3	7	2169.98	1098.63	1534.36	#NULL!	1077.25	1220.1	#NULL!	1613.63	#NULL!	#NULL!	501	1	2	8	2	8	2	8	2	8	8	2	8	2	3	1	1	2	8	8	8	8	1	1	1
2015.01.07	A871931501	A8719315	2012	1	1	2	A871	1	43	#NULL!	2	3	4	1	2169.98	3563.97	5075.3	9194.46	4034.61	7042.68	7434.19	7447.84	15450.2	12133.3	501	1	2	8	2	8	2	8	2	8	8	2	8	1	8	2	8	2	8	8	8	8	1	1	1
2015.01.07	A871931502	A8719315	2012	1	1	2	A871	2	37	#NULL!	3	3	4	7	2169.98	1864.75	#NULL!	#NULL!	1848.18	2604.28	#NULL!	#NULL!	#NULL!	#NULL!	501	1	2	8	2	8	2	8	8	8	8	2	8	1	8	2	8	1	1	1	1	2	1	1	1
2015.01.07	A871931503	A8719315	2012	1	1	2	A871	1	9	#NULL!	3	3	1	#NULL!	2169.98	1471.68	#NULL!	#NULL!	1523	1952.29	#NULL!	#NULL!	#NULL!	#NULL!	501	1	2	8	2	8	2	8	8	8	8	8	8	8	8	8	8	2	8	8	8	8	1	1	1
2015.01.07	A871931504	A8719315	2012	1	1	2	A871	2	6	75	3	3	1	#NULL!	2169.98	2196.72	#NULL!	#NULL!	2099.85	2504.05	#NULL!	#NULL!	#NULL!	#NULL!	501	1	2	8	2	8	2	8	8	8	8	8	8	8	8	8	8	1	1	1	1	2	1	1	1
2015.01.07	A872904501	A8729045	2012	1	1	1	A872	1	48	#NULL!	2	3	3	5	6888.03	10214.1	26924.5	32211.8	14863.1	19095.3	37196.2	30758.8	32545.5	56522	512	1	2	8	2	8	2	8	2	8	8	2	8	1	8	2	8	2	8	8	8	8	1	1	1
2015.01.07	A872904502	A8729045	2012	1	1	1	A872	2	44	#NULL!	2	3	3	2	6888.03	5578.88	#NULL!	#NULL!	5485.81	8154.43	#NULL!	#NULL!	#NULL!	#NULL!	512	1	2	8	2	8	1	2	2	8	8	2	8	1	8	1	2	1	1	1	1	2	1	1	1
2015.01.07	A872904503	A8729045	2012	1	1	1	A872	1	15	#NULL!	2	3	2	7	6888.03	9338.43	#NULL!	#NULL!	9583.66	14159.4	#NULL!	#NULL!	#NULL!	#NULL!	512	1	1	2	2	8	2	8	8	8	8	8	8	1	8	2	8	2	8	8	8	8	1	1	1
2015.01.07	A872904504	A8729045	2012	1	1	1	A872	1	13	#NULL!	2	3	1	#NULL!	6888.03	4133.44	#NULL!	13722.2	5258.96	7942.42	#NULL!	#NULL!	16729.2	#NULL!	512	1	1	2	2	8	2	8	8	8	8	8	8	1	8	2	8	2	8	8	8	8	1	1	1
2015.01.07	A872906001	A8729060	2012	1	1	1	A872	2	42	#NULL!	1	2	3	3	6888.03	5578.88	8933.38	15903.3	#NULL!	#NULL!	19301.4	#NULL!	#NULL!	#NULL!	512	1	2	8	2	8	2	8	2	8	8	2	8	2	3	2	8	1	1	1	1	2	1	1	1
2015.01.07	A872906002	A8729060	2012	1	1	1	A872	2	15	#NULL!	1	2	2	7	6888.03	6750.56	#NULL!	#NULL!	13533.7	21009.2	#NULL!	#NULL!	#NULL!	#NULL!	512	1	2	8	2	8	2	8	8	8	8	8	8	1	8	2	8	1	1	1	1	2	1	1	1
2015.01.07	A872906003	A8729060	2012	1	1	1	A872	1	13	#NULL!	1	2	1	#NULL!	6888.03	4133.44	#NULL!	13722.2	7888.43	11913.6	#NULL!	#NULL!	25093.7	#NULL!	512	1	2	8	2	8	2	8	8	8	8	8	8	1	8	2	8	2	8	8	8	8	1	1	1
2015.01.07	A872907501	A8729075	2012	1	1	1	A872	2	29	#NULL!	3	3	4	3	6888.03	7984.17	#NULL!	#NULL!	16488.8	20971.9	#NULL!	#NULL!	#NULL!	#NULL!	512	1	2	8	2	8	2	8	8	8	8	2	8	1	8	1	1	2	8	8	8	8	1	1	1
2015.01.07	A872907502	A8729075	2012	1	1	1	A872	2	55	#NULL!	3	3	1	3	6888.03	5107.67	5703.5	#NULL!	#NULL!	#NULL!	#NULL!	#NULL!	#NULL!	#NULL!	512	1	2	8	2	8	2	8	2	8	8	2	8	1	8	2	8	1	1	1	1	2	1	1	1
2015.01.07	A872911401	A8729114	2012	1	1	1	A872	2	59	#NULL!	3	3	2	7	6888.03	10215.3	5703.5	#NULL!	10838.4	11235.2	#NULL!	7620.51	#NULL!	#NULL!	512	1	2	8	2	8	2	8	2	8	8	2	8	1	8	2	8	1	1	1	1	2	1	1	1
2015.01.07	A872912001	A8729120	2012	1	1	1	A872	1	72	#NULL!	1	1	1	7	6888.03	3487.3	5180.74	#NULL!	3419.46	3872.89	#NULL!	6860.93	#NULL!	#NULL!	512	1	2	8	2	8	2	8	2	8	8	2	8	2	3	2	8	2	8	8	8	8	1	1	1
2015.01.07	A872912002	A8729120	2012	1	1	1	A872	2	71	#NULL!	2	1	1	6	6888.03	4955.83	5900.59	#NULL!	4502.22	4183.65	#NULL!	7413.19	#NULL!	#NULL!	512	1	2	8	2	8	2	8	2	8	8	2	8	1	8	2	8	2	8	8	8	8	1	1	1
2015.01.07	A872912301	A8729123	2012	1	1	1	A872	1	60	#NULL!	2	3	3	3	6888.03	9440.22	5775.5	33818.8	11110.1	7437.41	19488.5	8018.5	30519.5	24671.3	512	1	2	8	2	8	2	8	2	8	8	2	8	2	3	2	8	2	8	8	8	8	1	1	1
2015.01.07	A872912302	A8729123	2012	1	1	1	A872	2	58	#NULL!	2	3	3	1	6888.03	6810.22	5703.5	#NULL!	7225.59	7490.1	#NULL!	7620.51	#NULL!	#NULL!	512	1	2	8	2	8	2	8	2	8	8	2	8	2	3	2	8	2	8	8	8	8	1	1	1
2015.01.07	A872912303	A8729123	2012	1	1	1	A872	1	29	#NULL!	2	3	3	1	6888.03	16152.7	#NULL!	#NULL!	20488.4	26219.3	#NULL!	#NULL!	#NULL!	#NULL!	512	1	2	8	1	2	2	8	8	8	8	2	8	1	8	2	8	1	1	1	1	2	1	1	1
2015.01.07	A872912901	A8729129	2012	1	1	1	A872	2	80	#NULL!	3	1	1	7	6888.03	4796.56	#NULL!	#NULL!	4061.1	4183.65	#NULL!	#NULL!	#NULL!	#NULL!	512	1	2	8	2	8	2	8	2	8	8	2	8	1	8	2	8	1	1	1	1	2	1	1	1
2015.01.07	A872915602	A8729156	2012	1	1	1	A872	2	52	#NULL!	1	2	2	6	6888.03	5668.73	7300.86	13322.8	5484.27	6706.78	15837.5	9854.38	12350.9	20295.6	512	1	2	8	2	8	2	8	2	8	8	2	8	1	8	1	1	2	8	8	8	8	1	1	1
2015.01.07	A872920101	A8729201	2012	1	1	1	A872	1	50	#NULL!	3	3	3	5	6888.03	13202.9	12231.5	#NULL!	15629.5	17558.8	#NULL!	28174.5	#NULL!	#NULL!	512	1	2	8	2	8	2	8	1	2	2	2	8	1	8	1	1	2	8	8	8	8	1	1	1
2015.01.07	A872920102	A8729201	2012	1	1	1	A872	2	45	#NULL!	3	3	3	3	6888.03	8992.31	10102.1	#NULL!	#NULL!	#NULL!	#NULL!	#NULL!	#NULL!	#NULL!	512	1	2	8	2	8	2	8	2	8	8	2	8	1	8	2	8	2	8	8	8	8	1	1	1
2015.01.07	A872920103	A8729201	2012	1	1	1	A872	2	16	#NULL!	3	3	2	7	6888.03	6750.56	#NULL!	#NULL!	11278.1	17507.7	#NULL!	#NULL!	#NULL!	#NULL!	512	1	2	8	2	8	2	8	8	8	8	8	8	1	8	2	8	2	8	8	8	8	1	1	1
2015.01.07	A872920104	A8729201	2012	1	1	1	A872	2	13	#NULL!	3	3	1	#NULL!	6888.03	4476	#NULL!	12567.8	5950.89	8843.31	#NULL!	#NULL!	37217.9	#NULL!	512	1	2	8	2	8	2	8	8	8	8	8	8	1	8	2	8	2	8	8	8	8	1	1	1
2015.01.07	A872920105	A8729201	2012	1	1	1	A872	2	77	#NULL!	4	3	1	7	6888.03	4796.56	5900.59	#NULL!	5076.37	5229.56	#NULL!	11119.8	#NULL!	#NULL!	512	1	2	8	2	8	2	8	2	8	8	2	8	2	3	1	3	2	8	8	8	8	1	1	1
2015.01.07	A872922502	A8729225	2012	1	1	1	A872	2	50	#NULL!	1	2	3	7	6888.03	18216.9	21902.6	#NULL!	19307.3	20701.8	#NULL!	27682.7	#NULL!	#NULL!	512	1	2	8	2	8	2	8	2	8	8	2	8	1	8	1	1	2	8	8	8	8	1	1	1
2015.01.07	A872923101	A8729231	2012	1	1	1	A872	2	84	#NULL!	2	1	#NULL!	#NULL!	6888.03	4796.56	#NULL!	#NULL!	4061.1	4183.65	#NULL!	#NULL!	#NULL!	#NULL!	512	1	2	8	2	8	2	8	2	8	8	2	8	3	1	2	8	2	8	8	8	8	1	1	1
2015.01.07	A872926701	A8729267	2012	1	1	1	A872	1	59	#NULL!	3	4	2	5	6888.03	14220.1	8422.91	33041.3	13739.3	13258	23158.5	11606.3	29306	27358.7	512	1	1	2	1	2	2	8	2	8	8	2	8	1	8	1	2	2	8	8	8	8	2	1	1
2015.01.07	A872926702	A8729267	2012	1	1	1	A872	2	55	#NULL!	4	4	2	3	6888.03	7661.5	5703.5	#NULL!	8128.79	8426.37	#NULL!	7620.51	#NULL!	#NULL!	512	1	2	8	1	1	2	8	2	8	8	2	8	1	8	1	1	1	1	2	2	1	1	2	2
2015.01.07	A872928501	A8729285	2012	1	1	1	A872	1	69	#NULL!	4	4	2	7	6888.03	4471.48	10391.6	#NULL!	4733.44	4597.46	#NULL!	13286.9	#NULL!	#NULL!	512	1	2	8	2	8	1	2	1	2	2	2	8	2	3	1	2	1	2	1	1	2	1	1	1
2015.01.07	A872928502	A8729285	2012	1	1	1	A872	2	63	#NULL!	4	4	2	6	6888.03	5210.11	#NULL!	15550.4	4794.68	4245.57	#NULL!	#NULL!	14184.8	#NULL!	512	1	2	8	2	8	2	8	2	8	8	2	8	1	8	2	8	2	8	8	8	8	1	1	1
2015.01.07	A872928503	A8729285	2012	1	1	1	A872	1	39	#NULL!	4	4	4	3	6888.03	9106.38	#NULL!	24277.1	8907.37	14891.5	#NULL!	#NULL!	23159.9	#NULL!	512	1	2	8	2	8	2	8	8	8	8	2	8	1	8	2	8	2	8	8	8	8	1	1	1
2015.01.07	A872929401	A8729294	2012	1	1	1	A872	1	53	#NULL!	3	4	4	3	6888.03	15843.5	27447	#NULL!	#NULL!	#NULL!	#NULL!	#NULL!	#NULL!	#NULL!	512	1	2	8	2	8	2	8	1	2	2	2	8	1	8	1	1	2	8	8	8	8	1	1	1
2015.01.07	A872929402	A8729294	2012	1	1	1	A872	2	49	#NULL!	3	4	3	7	6888.03	10790.8	#NULL!	#NULL!	12713.8	14118	#NULL!	#NULL!	#NULL!	#NULL!	512	1	2	8	2	8	2	8	2	8	8	2	8	2	3	1	2	2	8	8	8	8	1	1	1
2015.01.07	A872929404	A8729294	2012	1	1	1	A872	2	22	#NULL!	3	4	3	3	6888.03	8894.76	#NULL!	#NULL!	10769.6	17335.8	#NULL!	#NULL!	#NULL!	#NULL!	512	1	1	2	2	8	2	8	8	8	8	2	8	1	8	2	8	1	1	2	2	1	1	1	1
2015.01.07	A872929406	A8729294	2012	1	1	1	A872	2	80	#NULL!	4	4	#NULL!	#NULL!	6888.03	5755.88	#NULL!	#NULL!	6091.64	6275.47	#NULL!	#NULL!	#NULL!	#NULL!	512	1	2	8	2	8	2	8	2	8	8	2	8	1	8	1	1	2	8	8	8	8	1	1	1
2015.01.07	A872929701	A8729297	2012	1	1	1	A872	1	39	#NULL!	4	4	4	2	6888.03	9106.38	#NULL!	#NULL!	8907.37	14891.5	#NULL!	#NULL!	#NULL!	#NULL!	512	1	2	8	2	8	2	8	8	8	8	2	8	1	8	1	1	2	8	8	8	8	1	1	1
2015.01.07	A872929702	A8729297	2012	1	1	1	A872	2	35	#NULL!	4	4	4	2	6888.03	5919.17	#NULL!	31586.6	5866.56	8266.62	#NULL!	#NULL!	24920.5	#NULL!	512	1	2	8	2	8	2	8	8	8	8	2	8	1	8	2	8	2	8	8	8	8	1	1	1
2015.01.07	A872931201	A8729312	2012	1	1	1	A872	2	28	#NULL!	3	3	4	1	6888.03	7984.17	#NULL!	#NULL!	8244.39	11068.1	#NULL!	#NULL!	#NULL!	#NULL!	512	1	1	1	1	1	1	2	8	8	8	2	8	1	8	2	8	1	2	2	2	2	2	2	2
2015.01.07	A872931202	A8729312	2012	1	1	1	A872	1	26	#NULL!	3	3	3	5	6888.03	12114.6	#NULL!	25273.5	15366.3	25062.3	#NULL!	#NULL!	30307	#NULL!	512	1	2	8	2	8	2	8	8	8	8	2	8	1	8	2	8	1	1	2	2	1	2	1	1
2015.01.07	A872931203	A8729312	2012	1	1	1	A872	2	27	#NULL!	3	3	4	2	6888.03	7984.17	#NULL!	24115.3	8244.39	11068.1	#NULL!	#NULL!	23277.8	#NULL!	512	1	2	8	2	8	2	8	8	8	8	2	8	1	8	2	8	1	1	1	1	2	1	1	1
2015.01.07	A872931204	A8729312	2012	1	1	1	A872	2	27	#NULL!	3	3	3	7	6888.03	7984.17	#NULL!	#NULL!	8244.39	11068.1	#NULL!	#NULL!	#NULL!	#NULL!	512	1	2	8	2	8	2	8	8	8	8	1	1	1	8	1	2	2	8	8	8	8	1	1	1
2015.01.07	A873914701	A8739147	2012	1	1	1	A873	1	45	#NULL!	1	2	#NULL!	#NULL!	5034.27	7465.2	11622.6	21188.4	#NULL!	#NULL!	26760.9	#NULL!	#NULL!	#NULL!	512	1	2	8	2	8	2	8	2	8	8	2	8	1	8	2	8	2	8	8	8	8	1	1	1
2015.01.07	A873914702	A8739147	2012	1	1	1	A873	2	70	#NULL!	4	2	2	7	5034.27	3622.07	5094.23	#NULL!	7897.31	7338.5	#NULL!	13714.6	#NULL!	#NULL!	512	1	2	8	2	8	2	8	1	2	2	2	8	1	8	2	8	2	8	8	8	8	1	1	1
2015.01.07	A873915602	A8739156	2012	1	1	1	A873	2	56	#NULL!	2	2	1	6	5034.27	3733.05	9848.14	17229.9	4752.88	4926.88	21421.1	14098.1	27838.2	51964.5	512	1	2	8	2	8	2	8	2	8	8	2	8	1	8	2	8	1	1	1	1	2	1	1	1
2015.01.07	A873916201	A8739162	2012	1	1	1	A873	2	71	#NULL!	3	2	1	7	5034.27	3622.07	5094.23	#NULL!	3948.66	3669.25	#NULL!	6857.28	#NULL!	#NULL!	512	1	2	8	2	8	2	8	2	8	8	2	8	1	8	1	2	2	8	8	8	8	1	1	1
2015.01.07	A873917102	A8739171	2012	1	1	1	A873	2	29	#NULL!	1	2	4	7	5034.27	11670.8	#NULL!	15862.7	7230.71	12943	#NULL!	#NULL!	28709.6	#NULL!	512	1	2	8	2	8	2	8	8	8	8	2	8	1	8	2	8	2	8	8	8	8	1	1	1
2015.01.07	A873917103	A8739171	2012	1	1	1	A873	2	4	54	2	2	1	#NULL!	5034.27	5162.77	#NULL!	#NULL!	4697.41	9243.72	#NULL!	#NULL!	#NULL!	#NULL!	512	1	1	2	1	2	1	2	8	8	8	8	8	8	8	8	8	8	8	8	8	8	8	8	8
2015.01.07	A873917104	A8739171	2012	1	1	1	A873	2	3	36	2	2	1	#NULL!	5034.27	5162.77	#NULL!	#NULL!	7046.11	9243.72	#NULL!	#NULL!	#NULL!	#NULL!	512	1	8	8	8	8	8	8	8	8	8	8	8	8	8	8	8	8	8	8	8	8	8	8	8
2015.01.07	A873918001	A8739180	2012	1	1	1	A873	2	82	#NULL!	#NULL!	#NULL!	#NULL!	#NULL!	5034.27	3505.67	#NULL!	#NULL!	3561.77	5503.88	#NULL!	#NULL!	#NULL!	#NULL!	512	1	2	8	2	8	2	8	2	8	8	2	8	1	8	2	8	2	8	8	8	8	1	1	1
2015.01.07	A873918002	A8739180	2012	1	1	1	A873	2	14	#NULL!	#NULL!	#NULL!	1	#NULL!	5034.27	7360.61	#NULL!	#NULL!	4175.36	9307.19	#NULL!	#NULL!	#NULL!	#NULL!	512	1	2	8	2	8	2	8	8	8	8	8	8	1	8	2	8	2	8	8	8	8	1	1	1
2015.01.07	A873919801	A8739198	2012	1	1	1	A873	1	38	#NULL!	4	4	3	5	5034.27	6655.6	#NULL!	10646.1	7812.18	13060.5	#NULL!	#NULL!	19042.8	#NULL!	512	1	2	8	2	8	2	8	8	8	8	2	8	1	8	2	8	2	8	8	8	8	1	1	1
2015.01.07	A873920101	A8739201	2012	1	1	1	A873	1	76	#NULL!	4	2	3	7	5034.27	2639.71	4472.76	#NULL!	2934.42	3396.7	#NULL!	6346.43	#NULL!	#NULL!	512	1	2	8	2	8	2	8	1	3	2	2	8	1	8	2	8	2	8	8	8	8	1	1	1
2015.01.07	A873920102	A8739201	2012	1	1	1	A873	2	70	#NULL!	3	2	1	6	5034.27	3622.07	5094.23	#NULL!	3948.66	3669.25	#NULL!	6857.28	#NULL!	#NULL!	512	1	2	8	2	8	1	2	2	8	8	2	8	2	3	2	8	2	8	8	8	8	1	1	1
2015.01.07	A873921901	A8739219	2012	1	1	1	A873	1	58	#NULL!	3	3	3	6	5034.27	6928.72	7271.86	10867	12050	11627.9	16661.4	10736	36144.5	39366.6	512	1	2	8	1	2	2	8	2	8	8	2	8	1	8	2	8	2	8	8	8	8	1	1	1
2015.01.07	A873921902	A8739219	2012	1	1	1	A873	2	55	#NULL!	3	3	3	3	5034.27	3733.05	4924.07	#NULL!	7129.33	7390.31	#NULL!	7049.05	#NULL!	#NULL!	512	1	2	8	2	8	2	8	2	8	8	2	8	1	8	2	8	1	1	1	1	2	1	1	1
2015.01.07	A873921903	A8739219	2012	1	1	1	A873	1	24	#NULL!	3	3	3	7	5034.27	17861.8	#NULL!	15339.4	#NULL!	#NULL!	#NULL!	#NULL!	#NULL!	#NULL!	512	1	2	8	2	8	2	8	8	8	8	2	8	1	8	2	8	2	8	8	8	8	1	1	1
2015.01.07	A873922802	A8739228	2012	1	1	1	A873	2	29	#NULL!	4	4	4	2	5034.27	5835.41	#NULL!	#NULL!	7230.71	9707.25	#NULL!	#NULL!	#NULL!	#NULL!	512	1	2	8	1	2	2	8	8	8	8	2	8	1	8	2	8	2	8	8	8	8	1	1	1
2015.01.07	A873923701	A8739237	2012	1	1	1	A873	1	29	#NULL!	3	3	3	3	5034.27	8854.19	#NULL!	16624.5	#NULL!	#NULL!	#NULL!	#NULL!	#NULL!	#NULL!	512	1	2	8	2	8	2	8	8	8	8	2	8	1	8	2	8	2	8	8	8	8	1	1	1
2015.01.07	A873923702	A8739237	2012	1	1	1	A873	2	29	#NULL!	3	3	3	7	5034.27	5835.41	#NULL!	#NULL!	#NULL!	#NULL!	#NULL!	#NULL!	#NULL!	#NULL!	512	1	2	8	2	8	2	8	8	8	8	2	8	1	8	2	8	2	8	8	8	8	1	1	1
2015.01.07	A873923703	A8739237	2012	1	1	1	A873	1	2	34	4	3	1	#NULL!	5034.27	3352.55	#NULL!	#NULL!	#NULL!	#NULL!	#NULL!	#NULL!	#NULL!	#NULL!	512	1	8	8	8	8	8	8	8	8	8	8	8	8	8	8	8	8	8	8	8	8	8	8	8
2015.01.07	A873924901	A8739249	2012	1	1	1	A873	1	30	#NULL!	1	1	4	1	5034.27	12532.3	#NULL!	#NULL!	15058.5	21760.7	#NULL!	#NULL!	#NULL!	#NULL!	512	1	2	8	2	8	2	8	8	8	8	2	8	1	8	2	8	2	8	8	8	8	1	1	1
2015.01.07	A873924902	A8739249	2012	1	1	1	A873	2	33	#NULL!	1	1	4	7	5034.27	6210.9	#NULL!	21509.7	6873.04	8423.67	#NULL!	#NULL!	36708.1	#NULL!	512	1	2	8	2	8	1	2	8	8	8	1	1	1	8	2	8	2	8	8	8	8	1	1	1
2015.01.07	A873924903	A8739249	2012	1	1	1	A873	1	4	52	1	1	1	#NULL!	5034.27	3352.55	#NULL!	#NULL!	3445.89	5178.61	#NULL!	#NULL!	#NULL!	#NULL!	512	1	2	8	2	8	1	2	8	8	8	8	8	8	8	8	8	8	8	8	8	8	8	8	8
2015.01.07	A873925801	A8739258	2012	1	1	1	A873	2	77	#NULL!	3	2	1	2	5034.27	3505.67	#NULL!	#NULL!	3561.77	3669.25	#NULL!	#NULL!	#NULL!	#NULL!	512	1	2	8	2	8	2	8	2	8	8	2	8	2	3	1	1	2	8	8	8	8	1	1	1
2015.01.07	A873928201	A8739282	2012	1	1	1	A873	1	52	#NULL!	3	4	2	5	5034.27	12866.2	10560	#NULL!	#NULL!	#NULL!	#NULL!	#NULL!	#NULL!	#NULL!	512	1	2	8	2	8	2	8	2	8	8	2	8	1	8	2	8	1	1	1	2	1	1	2	1
2015.01.07	A873928202	A8739282	2012	1	1	1	A873	2	48	#NULL!	4	4	1	7	5034.27	8762.97	8721.59	21878.6	#NULL!	#NULL!	28963.3	#NULL!	#NULL!	#NULL!	512	1	2	8	1	2	2	8	2	8	8	2	8	1	8	2	8	1	2	1	2	2	1	1	1
2015.01.07	A873928204	A8739282	2012	1	1	1	A873	2	21	#NULL!	4	4	3	3	5034.27	7223.25	#NULL!	17360.9	#NULL!	#NULL!	#NULL!	#NULL!	#NULL!	#NULL!	512	1	2	8	2	8	2	8	8	8	8	2	8	1	8	1	1	2	8	8	8	8	1	1	1
2015.01.07	A873930303	A8739303	2012	1	1	1	A873	2	80	#NULL!	1	1	1	7	5034.27	10517	#NULL!	#NULL!	10685.3	11007.8	#NULL!	#NULL!	#NULL!	#NULL!	512	1	2	8	2	8	2	8	2	8	8	2	8	2	3	1	1	2	8	8	8	8	1	1	1
2015.01.07	A873930902	A8739309	2012	1	1	1	A873	2	29	#NULL!	3	3	4	7	5034.27	8753.11	#NULL!	#NULL!	19636.9	19414.5	#NULL!	#NULL!	#NULL!	#NULL!	512	1	2	8	2	8	2	8	8	8	8	2	8	1	8	2	8	2	8	8	8	8	1	1	1
2015.01.07	A873930903	A8739309	2012	1	1	1	A873	1	2	30	4	3	#NULL!	#NULL!	5034.27	3352.55	#NULL!	#NULL!	5168.84	10357.2	#NULL!	#NULL!	#NULL!	#NULL!	512	1	8	8	8	8	8	8	8	8	8	8	8	8	8	8	8	8	8	8	8	8	8	8	8
2015.01.07	A873930905	A8739309	2012	1	1	1	A873	2	64	#NULL!	4	3	2	6	5034.27	5711.88	4007.94	20457.7	#NULL!	#NULL!	8460.17	#NULL!	#NULL!	#NULL!	512	1	2	8	2	8	2	8	2	8	8	2	8	1	8	2	8	2	8	8	8	8	1	1	1
2015.01.07	A873931501	A8739315	2012	1	1	1	A873	2	49	#NULL!	3	3	3	7	5034.27	6572.23	8721.59	#NULL!	7433.74	8254.73	#NULL!	11981.5	#NULL!	#NULL!	512	1	2	8	2	8	2	8	2	8	8	1	2	1	8	2	8	2	8	8	8	8	1	1	1
2015.01.07	A873931502	A8739315	2012	1	1	1	A873	1	25	#NULL!	3	3	4	3	5034.27	8854.19	#NULL!	33249	13477	21980.8	#NULL!	#NULL!	67510.5	#NULL!	512	1	2	8	2	8	2	8	8	8	8	2	8	1	8	2	8	2	8	8	8	8	1	1	1
2015.01.07	A873931503	A8739315	2012	1	1	1	A873	2	23	#NULL!	3	3	4	1	5034.27	5417.44	#NULL!	#NULL!	6296.94	10136.2	#NULL!	#NULL!	#NULL!	#NULL!	512	1	2	8	2	8	2	8	8	8	8	1	2	1	8	2	8	2	8	8	8	8	1	1	1
2015.01.07	A873931504	A8739315	2012	1	1	1	A873	1	54	#NULL!	3	3	3	2	5034.27	9649.63	10560	#NULL!	10966.2	12319.9	#NULL!	17374.5	#NULL!	#NULL!	512	1	2	8	2	8	2	8	2	8	8	2	8	1	8	2	8	2	8	8	8	8	1	1	1
2015.01.07	A873932101	A8739321	2012	1	1	1	A873	2	55	#NULL!	2	3	3	7	5034.27	11199.2	9848.14	#NULL!	#NULL!	#NULL!	#NULL!	#NULL!	#NULL!	#NULL!	512	1	2	8	2	8	2	8	2	8	8	2	8	1	8	2	8	2	8	8	8	8	1	1	1
2015.01.07	A873932401	A8739324	2012	1	1	1	A873	1	72	#NULL!	1	1	1	6	5034.27	2548.77	4472.76	#NULL!	2999.03	3396.7	#NULL!	6346.43	#NULL!	#NULL!	512	1	2	8	2	8	2	8	2	8	8	2	8	3	2	1	1	2	8	8	8	8	1	1	1
2015.01.07	A873932402	A8739324	2012	1	1	1	A873	2	71	#NULL!	2	1	1	7	5034.27	3622.07	5094.23	#NULL!	3948.66	3669.25	#NULL!	6857.28	#NULL!	#NULL!	512	1	2	8	2	8	2	8	1	3	1	1	2	1	8	1	2	1	1	2	2	1	1	1	1
2015.01.07	A874896401	A8748964	2012	1	1	2	A874	1	55	#NULL!	2	3	4	2	4473.37	6156.75	#NULL!	#NULL!	5948.56	5740.21	#NULL!	#NULL!	#NULL!	#NULL!	501	1	2	8	1	1	2	8	2	8	8	2	8	1	8	1	2	1	1	2	2	1	1	1	1
2015.01.07	A874896402	A8748964	2012	1	1	2	A874	2	52	#NULL!	2	3	3	7	4473.37	3681.51	9617.66	#NULL!	3561.71	4355.66	#NULL!	9736.12	#NULL!	#NULL!	501	1	2	8	1	2	2	8	2	8	8	2	8	1	8	2	8	2	8	8	8	8	1	1	1
2015.01.07	A874896403	A8748964	2012	1	1	2	A874	1	17	#NULL!	2	3	3	7	4473.37	7960	#NULL!	#NULL!	6224.02	9195.71	#NULL!	#NULL!	#NULL!	#NULL!	501	1	2	8	1	2	2	8	8	8	8	8	8	1	8	2	8	1	2	2	1	1	2	2	1
2015.01.07	A874898201	A8748982	2012	1	1	2	A874	1	55	#NULL!	4	4	4	1	4473.37	6156.75	5547.89	9103.56	5948.56	5740.21	8739.1	5733.52	9992.09	9439.18	501	1	2	8	1	2	2	8	2	8	8	2	8	1	8	2	8	2	8	8	8	8	1	1	1
2015.01.07	A874898202	A8748982	2012	1	1	2	A874	2	55	#NULL!	4	4	4	7	4473.37	3317.13	3756.7	#NULL!	3519.45	3648.29	#NULL!	3764.53	#NULL!	#NULL!	501	1	2	8	2	8	2	8	1	3	2	2	8	2	3	1	1	2	8	8	8	8	1	1	1
2015.01.07	A874898203	A8748982	2012	1	1	2	A874	2	27	#NULL!	4	4	3	1	4473.37	5185.25	#NULL!	#NULL!	5354.24	7188.09	#NULL!	#NULL!	#NULL!	#NULL!	501	1	2	8	2	8	2	8	8	8	8	2	8	1	8	2	8	1	1	2	2	1	1	1	1
2015.01.07	A874898204	A8748982	2012	1	1	2	A874	1	25	#NULL!	4	4	3	7	4473.37	7867.69	#NULL!	10445	9979.5	16276.5	#NULL!	#NULL!	15500.1	#NULL!	501	1	2	8	1	2	2	8	8	8	8	2	8	1	8	2	8	1	1	2	1	1	1	1	1
2015.01.07	A874902401	A8749024	2012	1	1	2	A874	1	65	#NULL!	4	4	3	7	4473.37	2903.97	3422.29	#NULL!	3074.09	2985.78	#NULL!	3281.87	#NULL!	#NULL!	501	1	2	8	2	8	2	8	2	8	8	2	8	1	8	2	8	2	8	8	8	8	1	1	1
2015.01.07	A874902402	A8749024	2012	1	1	2	A874	2	64	#NULL!	4	4	3	7	4473.37	3383.66	3057.76	8568.93	3113.86	2757.25	8874.91	2973.07	9672.79	9855.11	501	1	2	8	2	8	2	8	2	8	8	1	2	1	8	2	8	2	8	8	8	8	1	1	1
2015.01.07	A874903601	A8749036	2012	1	1	2	A874	1	51	#NULL!	4	4	4	2	4473.37	8574.51	8056.51	#NULL!	8120.36	9122.72	#NULL!	9278.79	#NULL!	#NULL!	501	1	2	8	2	8	2	8	1	3	2	2	8	1	8	2	8	2	8	8	8	8	1	1	1
2015.01.07	A874903602	A8749036	2012	1	1	2	A874	2	38	#NULL!	4	4	3	2	4473.37	3844.15	#NULL!	#NULL!	3809.98	5368.68	#NULL!	#NULL!	#NULL!	#NULL!	501	1	2	8	1	2	2	8	8	8	8	2	8	1	8	2	8	1	1	2	1	1	1	1	1
2015.01.07	A874903603	A8749036	2012	1	1	2	A874	2	25	#NULL!	4	4	4	2	4473.37	5185.25	#NULL!	#NULL!	5354.24	7188.09	#NULL!	#NULL!	#NULL!	#NULL!	501	1	1	2	1	2	2	8	8	8	8	2	8	1	8	2	8	1	2	2	2	1	2	2	1
2015.01.07	A874903605	A8749036	2012	1	1	2	A874	1	11	#NULL!	4	4	1	#NULL!	4473.37	2818.65	#NULL!	#NULL!	2988.46	5158.14	#NULL!	#NULL!	#NULL!	#NULL!	501	1	2	8	2	8	2	8	8	8	8	8	8	8	8	8	8	1	2	2	1	2	1	1	1
2015.01.07	A874904501	A8749045	2012	1	1	2	A874	1	74	#NULL!	3	2	3	7	4473.37	2264.8	3412.38	#NULL!	2220.74	2515.21	#NULL!	3389.3	#NULL!	#NULL!	501	1	2	8	1	2	1	2	2	8	8	2	8	3	1	1	1	1	1	2	1	2	1	2	1
2015.01.07	A874904502	A8749045	2012	1	1	2	A874	2	70	#NULL!	3	2	1	7	4473.37	3218.52	3886.52	#NULL!	2923.93	2717.03	#NULL!	3662.12	#NULL!	#NULL!	501	1	2	8	2	8	2	8	1	2	2	2	8	1	8	2	8	1	1	2	1	2	1	1	1
2015.01.07	A874907201	A8749072	2012	1	1	2	A874	1	77	#NULL!	4	3	2	7	4473.37	2345.61	3412.38	#NULL!	3621.5	4192.02	#NULL!	4519.07	#NULL!	#NULL!	501	1	2	8	1	2	2	8	2	8	8	2	8	3	3	2	8	2	8	8	8	8	1	1	1
2015.01.07	A874907202	A8749072	2012	1	1	2	A874	2	69	#NULL!	4	3	1	7	4473.37	2165.83	2570.59	#NULL!	3732.94	3848.77	#NULL!	3252.39	#NULL!	#NULL!	501	1	1	2	2	8	2	8	1	3	2	2	8	1	8	1	1	1	2	1	1	2	1	1	1
2015.01.07	A874907203	A8749072	2012	1	1	2	A874	1	45	#NULL!	2	3	4	2	4473.37	6633.45	8867.14	26625	#NULL!	#NULL!	28072.8	#NULL!	#NULL!	#NULL!	501	1	2	8	2	8	2	8	2	8	8	2	8	1	8	2	8	2	8	8	8	8	1	1	1
2015.01.07	A874907204	A8749072	2012	1	1	2	A874	2	43	#NULL!	2	3	4	2	4473.37	3623.15	5884.12	#NULL!	5937.85	8826.37	#NULL!	7147.98	#NULL!	#NULL!	501	1	1	2	2	8	2	8	2	8	8	2	8	2	3	1	2	2	8	8	8	8	1	1	1
2015.01.07	A874907205	A8749072	2012	1	1	2	A874	1	13	#NULL!	3	3	1	#NULL!	4473.37	3523.31	#NULL!	19494.4	#NULL!	#NULL!	#NULL!	#NULL!	#NULL!	#NULL!	501	1	1	2	2	8	2	8	8	8	8	8	8	1	8	1	1	2	8	8	8	8	1	1	1
2015.01.07	A874908101	A8749081	2012	1	1	2	A874	1	72	#NULL!	4	3	3	7	4473.37	2264.8	5118.57	25839.3	2220.74	2515.21	47966.3	5083.95	29981.2	51923.8	501	1	2	8	2	8	1	2	1	2	2	2	8	1	8	2	8	2	8	8	8	8	1	1	1
2015.01.07	A874908102	A8749081	2012	1	1	2	A874	2	67	#NULL!	4	3	1	7	4473.37	2165.83	3855.89	#NULL!	2239.76	2309.26	#NULL!	3658.94	#NULL!	#NULL!	501	1	2	8	2	8	1	2	2	8	8	2	8	1	8	1	1	1	2	2	2	1	2	1	1
2015.01.07	A874908103	A8749081	2012	1	1	2	A874	1	40	#NULL!	2	3	#NULL!	#NULL!	4473.37	7347.06	#NULL!	11426.9	8317.28	14518.4	#NULL!	#NULL!	17601.5	#NULL!	501	1	2	8	2	8	2	8	2	8	8	2	8	1	8	2	8	2	8	8	8	8	1	1	1
2015.01.07	A874908104	A8749081	2012	1	1	2	A874	2	5	63	2	3	1	#NULL!	4473.37	4004.14	#NULL!	#NULL!	3987.06	5162.06	#NULL!	#NULL!	#NULL!	#NULL!	501	1	2	8	2	8	2	8	8	8	8	8	8	8	8	8	8	8	8	8	8	8	8	8	8
2015.01.07	A874911703	A8749117	2012	1	1	2	A874	2	5	67	3	3	#NULL!	#NULL!	4473.37	4004.14	#NULL!	#NULL!	3987.06	6882.74	#NULL!	#NULL!	#NULL!	#NULL!	501	1	2	8	2	8	2	8	8	8	8	8	8	8	8	8	8	8	8	8	8	8	8	8	8
2015.01.07	A874911704	A8749117	2012	1	1	2	A874	1	3	36	3	3	#NULL!	#NULL!	4473.37	2780.42	#NULL!	#NULL!	3572.29	5112.93	#NULL!	#NULL!	#NULL!	#NULL!	501	1	8	8	8	8	8	8	8	8	8	8	8	8	8	8	8	8	8	8	8	8	8	8	8
2015.01.07	A874913201	A8749132	2012	1	1	2	A874	1	29	#NULL!	3	3	4	1	4473.37	7867.69	#NULL!	5222.52	9979.5	16276.5	#NULL!	#NULL!	7750.04	#NULL!	501	1	2	8	1	2	2	8	8	8	8	2	8	1	8	2	8	1	2	2	2	1	2	2	1
2015.01.07	A874913202	A8749132	2012	1	1	2	A874	2	28	#NULL!	2	3	4	7	4473.37	5185.25	#NULL!	4983.2	5354.24	7188.09	#NULL!	#NULL!	5952.55	#NULL!	501	1	2	8	1	2	1	2	8	8	8	2	8	1	8	2	8	2	8	8	8	8	1	1	1
2015.01.07	A874915601	A8749156	2012	1	1	2	A874	2	59	#NULL!	3	3	1	7	4473.37	3317.13	3756.7	5412.7	3519.45	3648.29	5617.81	3764.53	5771.87	6229.93	501	1	2	8	2	8	2	8	1	2	2	2	8	2	3	2	8	1	2	1	1	2	1	1	1
2015.01.07	A874919201	A8749192	2012	1	1	2	A874	1	67	#NULL!	2	1	#NULL!	#NULL!	4473.37	4355.95	3422.29	9370.32	4611.14	4478.67	7773.25	3281.87	10385.3	8718.52	501	1	2	8	2	8	2	8	2	8	8	2	8	3	2	1	2	1	2	2	1	2	1	2	1
2015.01.07	A874919202	A8749192	2012	1	1	2	A874	2	60	#NULL!	2	1	#NULL!	7	4473.37	5075.49	3057.76	#NULL!	4670.8	4135.87	#NULL!	2973.07	#NULL!	#NULL!	501	1	2	8	2	8	1	2	2	8	8	2	8	1	8	2	8	2	8	8	8	8	1	1	1
2015.01.07	A874925802	A8749258	2012	1	1	2	A874	2	42	#NULL!	3	4	4	7	4473.37	7246.31	11768.2	13145.1	7125.42	7943.73	14567.2	10722	12955.4	14853.1	501	1	2	8	2	8	2	8	2	8	8	2	8	1	8	2	8	2	8	8	8	8	1	1	1
2015.01.07	A874925803	A8749258	2012	1	1	2	A874	1	1	14	4	4	1	#NULL!	4473.37	2780.42	#NULL!	#NULL!	3572.29	5752.04	#NULL!	#NULL!	#NULL!	#NULL!	501	1	8	8	8	8	8	8	8	8	8	8	8	8	8	8	8	8	8	8	8	8	8	8	8
2015.01.07	A874929401	A8749294	2012	1	1	2	A874	2	59	#NULL!	2	2	2	7	4473.37	6634.26	3756.7	10825.4	7038.89	7296.57	5617.81	3764.53	11543.7	6229.93	501	1	2	8	2	8	2	8	1	3	2	2	8	1	8	2	8	1	1	1	2	2	1	1	1
2015.01.07	A874930602	A8749306	2012	1	1	2	A874	2	36	#NULL!	2	3	4	7	4473.37	7688.31	#NULL!	13054.1	7619.97	7158.24	#NULL!	#NULL!	19117.8	#NULL!	501	1	2	8	2	8	2	8	8	8	8	2	8	1	8	2	8	2	8	8	8	8	1	1	1
2015.01.07	A874930603	A8749306	2012	1	1	2	A874	2	11	#NULL!	2	3	1	#NULL!	4473.37	3052.24	#NULL!	#NULL!	2705.33	6126.09	#NULL!	#NULL!	#NULL!	#NULL!	501	1	2	8	2	8	2	8	8	8	8	8	8	8	8	8	8	1	1	2	1	2	1	1	1
2015.01.07	A874930604	A8749306	2012	1	1	2	A874	1	9	#NULL!	2	3	1	#NULL!	4473.37	2682.56	#NULL!	#NULL!	2891.77	5366.14	#NULL!	#NULL!	#NULL!	#NULL!	501	1	2	8	2	8	2	8	8	8	8	8	8	8	8	8	8	2	8	8	8	8	1	2	1
2015.01.07	A875900901	A8759009	2012	1	1	1	A875	1	74	#NULL!	3	2	1	6	9395.44	4756.77	#NULL!	#NULL!	4664.22	5282.71	#NULL!	#NULL!	#NULL!	#NULL!	512	1	2	8	2	8	2	8	2	8	8	2	8	2	3	2	8	2	8	8	8	8	1	1	1
2015.01.07	A875900902	A8759009	2012	1	1	1	A875	2	66	#NULL!	3	2	1	7	9395.44	4548.9	10026.8	#NULL!	4704.18	4850.15	#NULL!	9514.61	#NULL!	#NULL!	512	1	2	8	2	8	2	8	1	2	2	2	8	1	8	2	8	2	8	8	8	8	1	1	1
2015.01.07	A875906301	A8759063	2012	1	1	1	A875	2	35	#NULL!	2	3	4	2	9395.44	8073.89	#NULL!	18311.1	8002.12	11275.9	#NULL!	#NULL!	16252.5	#NULL!	512	1	2	8	1	2	2	8	8	8	8	2	8	1	8	2	8	1	1	2	1	2	1	1	1
2015.01.07	A875907201	A8759072	2012	1	1	1	A875	2	32	#NULL!	2	3	3	2	9395.44	11591.4	#NULL!	#NULL!	10689.3	13100.9	#NULL!	#NULL!	#NULL!	#NULL!	512	1	2	8	2	8	2	8	8	8	8	2	8	1	8	2	8	1	2	2	2	1	2	1	1
2015.01.07	A875909001	A8759090	2012	1	1	1	A875	2	23	#NULL!	1	2	4	1	9395.44	10110.5	#NULL!	15300.3	9793.3	15764.3	#NULL!	#NULL!	15466.1	#NULL!	512	1	1	2	1	2	2	8	8	8	8	2	8	1	8	1	1	1	1	2	1	1	1	1	1
2015.01.07	A875909901	A8759099	2012	1	1	1	A875	1	38	#NULL!	3	4	4	1	9395.44	12421.3	#NULL!	18764.9	12149.9	20312.3	#NULL!	#NULL!	20139.1	#NULL!	512	1	2	8	2	8	2	8	8	8	8	2	8	1	8	2	8	2	8	8	8	8	1	1	1
2015.01.07	A875912001	A8759120	2012	1	1	1	A875	2	40	#NULL!	2	3	4	1	9395.44	7609.73	11475.7	#NULL!	7482.77	11122.8	#NULL!	10455.4	#NULL!	#NULL!	512	1	2	8	2	8	2	8	1	2	2	2	8	1	8	2	8	2	8	8	8	8	1	1	1
2015.01.07	A875913801	A8759138	2012	1	1	1	A875	1	74	#NULL!	3	2	2	7	9395.44	4756.77	13310.2	#NULL!	4664.22	5282.71	#NULL!	13220.2	#NULL!	#NULL!	512	1	2	8	2	8	2	8	2	8	8	2	8	2	3	1	1	1	2	2	2	2	2	1	1
2015.01.07	A875913802	A8759138	2012	1	1	1	A875	2	65	#NULL!	3	2	1	7	9395.44	4548.9	#NULL!	#NULL!	4704.18	4850.15	#NULL!	#NULL!	#NULL!	#NULL!	512	1	2	8	2	8	2	8	1	2	2	2	8	2	3	2	8	2	8	8	8	8	1	1	1
2015.01.07	A875917401	A8759174	2012	1	1	1	A875	2	25	#NULL!	3	3	4	2	9395.44	10890.6	#NULL!	13979.9	11245.5	15097.2	#NULL!	#NULL!	15181.2	#NULL!	512	1	2	8	2	8	2	8	8	8	8	2	8	1	8	1	1	1	1	1	1	2	1	1	1
2015.01.07	A875922801	A8759228	2012	1	1	1	A875	1	65	#NULL!	4	3	4	1	9395.44	9148.81	13348.9	#NULL!	6456.53	9406.56	#NULL!	12801.1	#NULL!	#NULL!	512	1	2	8	2	8	2	8	1	2	2	2	8	1	8	2	8	2	8	8	8	8	1	1	1
2015.01.07	A875922802	A8759228	2012	1	1	1	A875	2	61	#NULL!	3	3	4	1	9395.44	10660.1	#NULL!	#NULL!	6540.06	8686.59	#NULL!	#NULL!	#NULL!	#NULL!	512	1	2	8	2	8	2	8	2	8	8	2	8	1	8	2	8	2	8	8	8	8	1	1	1
2015.01.07	A875924001	A8759240	2012	1	1	1	A875	1	54	#NULL!	2	3	3	1	9395.44	18009.1	15712.5	38085.4	17055.2	19160.5	52313	18096.3	37407.9	52329.9	512	1	2	8	1	2	2	8	2	8	8	2	8	1	8	2	8	1	1	1	1	2	1	1	1
2015.01.07	A875924002	A8759240	2012	1	1	1	A875	2	54	#NULL!	2	3	3	2	9395.44	7732.28	9378.58	#NULL!	7480.68	9148.2	#NULL!	9494.09	#NULL!	#NULL!	512	1	2	8	2	8	2	8	1	3	2	2	8	1	8	2	8	2	8	8	8	8	1	1	1
2015.01.07	A875924003	A8759240	2012	1	1	1	A875	2	14	#NULL!	2	3	1	#NULL!	9395.44	6486.95	#NULL!	18214.2	6493.72	9649.98	#NULL!	#NULL!	19418	#NULL!	512	1	2	8	2	8	2	8	8	8	8	8	8	1	8	1	1	1	1	1	1	2	1	2	1
2015.01.07	A875924004	A8759240	2012	1	1	1	A875	1	13	#NULL!	2	3	1	#NULL!	9395.44	5990.49	#NULL!	#NULL!	7173.34	10833.7	#NULL!	#NULL!	#NULL!	#NULL!	512	1	2	8	1	2	1	2	8	8	8	8	8	2	3	1	1	1	1	1	1	2	1	1	1
2015.01.07	A875924301	A8759243	2012	1	1	1	A875	1	85	#NULL!	2	1	1	7	9395.44	4926.48	13310.2	#NULL!	4563.75	5282.71	#NULL!	13220.2	#NULL!	#NULL!	512	1	2	8	2	8	2	8	1	1	2	2	8	3	3	2	8	2	8	8	8	8	1	1	1
2015.01.07	A875924302	A8759243	2012	1	1	1	A875	2	82	#NULL!	3	1	1	7	9395.44	6542.63	#NULL!	#NULL!	5539.43	5706.59	#NULL!	#NULL!	#NULL!	#NULL!	512	1	2	8	2	8	2	8	2	8	8	2	8	1	8	2	8	2	8	8	8	8	1	1	1
2015.01.07	A875925201	A8759252	2012	1	1	1	A875	2	62	#NULL!	1	1	1	6	9395.44	7106.71	5963.5	12019.7	6540.06	5791.06	17308.6	5798.32	12334.6	16817.7	512	1	2	8	1	1	2	8	2	8	8	2	8	1	8	2	8	1	1	2	2	2	2	2	1
2015.01.07	A875926701	A8759267	2012	1	1	1	A875	1	40	#NULL!	2	3	3	5	9395.44	15431.1	#NULL!	21371.5	17468.8	24074.7	#NULL!	#NULL!	29926.8	#NULL!	512	1	2	8	2	8	2	8	1	2	2	2	8	1	8	2	8	2	8	8	8	8	1	1	1
2015.01.07	A875929101	A8759291	2012	1	1	1	A875	2	78	#NULL!	2	1	1	7	9395.44	6542.63	7579.8	#NULL!	5539.43	5706.59	#NULL!	7142.16	#NULL!	#NULL!	512	1	2	8	2	8	2	8	1	2	2	2	8	1	8	2	8	2	8	8	8	8	1	1	1
2015.01.07	A875929102	A8759291	2012	1	1	1	A875	1	28	#NULL!	1	1	4	1	9395.44	16524.5	#NULL!	29302.6	20960	26219.3	#NULL!	#NULL!	39530.9	#NULL!	512	1	2	8	1	2	2	8	8	8	8	2	8	1	8	1	1	2	8	8	8	8	1	1	1
2015.01.07	A875929401	A8759294	2012	1	1	1	A875	2	83	#NULL!	4	3	1	4	9395.44	13085.3	7579.8	#NULL!	11078.9	11413.2	#NULL!	7142.16	#NULL!	#NULL!	512	1	2	8	2	8	2	8	2	8	8	2	8	1	8	2	8	2	8	8	8	8	1	1	1
2015.01.07	A875929701	A8759297	2012	1	1	1	A875	1	41	#NULL!	2	3	2	5	9395.44	15431.1	22013.5	#NULL!	#NULL!	#NULL!	#NULL!	#NULL!	#NULL!	#NULL!	512	1	1	2	2	8	2	8	1	2	2	2	8	1	8	1	1	1	1	1	1	2	1	1	1
2015.01.07	A875929702	A8759297	2012	1	1	1	A875	2	44	#NULL!	2	3	3	5	9395.44	7609.73	11475.7	36877.2	11224.2	14830.4	56820.2	20910.9	24780.7	50693.7	512	1	2	8	1	2	2	8	1	2	2	2	8	1	8	2	8	1	1	2	2	1	1	1	1
2015.01.07	A875929703	A8759297	2012	1	1	1	A875	1	12	#NULL!	2	3	1	#NULL!	9395.44	5990.49	#NULL!	9943.61	10760	14444.9	#NULL!	#NULL!	16365.5	#NULL!	512	1	2	8	2	8	2	8	8	8	8	8	8	2	3	1	1	1	2	1	1	2	1	1	1
2015.01.07	A875929704	A8759297	2012	1	1	1	A875	2	9	#NULL!	2	3	1	#NULL!	9395.44	8510.04	#NULL!	#NULL!	8134.78	14455.8	#NULL!	#NULL!	#NULL!	#NULL!	512	1	2	8	2	8	1	2	8	8	8	8	8	8	8	8	8	2	8	8	8	8	1	1	1
2015.01.07	A875930601	A8759306	2012	1	1	1	A875	1	71	#NULL!	3	2	3	7	9395.44	4756.77	6655.1	74560	4664.22	5282.71	93549.1	6610.09	86667.8	105688	512	1	2	8	2	8	2	8	2	8	8	2	8	1	8	2	8	2	8	8	8	8	1	1	1
2015.01.07	A875930602	A8759306	2012	1	1	1	A875	2	66	#NULL!	3	2	3	7	9395.44	4548.9	5013.38	#NULL!	4704.18	4850.15	#NULL!	4757.31	#NULL!	#NULL!	512	1	2	8	2	8	2	8	1	2	2	2	8	3	3	2	8	2	8	8	8	8	1	1	1
2015.01.07	A876906301	A8769063	2012	1	1	1	A876	2	53	#NULL!	4	4	4	1	9113.58	7500.31	10803.7	#NULL!	8223.76	10056.9	#NULL!	10936.8	#NULL!	#NULL!	512	1	2	8	2	8	2	8	2	8	8	1	2	1	8	2	8	2	8	8	8	8	1	1	1
2015.01.07	A876906302	A8769063	2012	1	1	1	A876	1	58	#NULL!	4	4	4	3	9113.58	12543.1	12464.1	#NULL!	13734.8	13253.8	#NULL!	12881.2	#NULL!	#NULL!	512	1	2	8	2	8	2	8	1	2	2	2	8	1	8	1	2	2	8	8	8	8	1	1	1
2015.01.07	A876906303	A8769063	2012	1	1	1	A876	2	28	#NULL!	4	4	4	1	9113.58	10563.9	#NULL!	#NULL!	12362.6	16596.8	#NULL!	#NULL!	#NULL!	#NULL!	512	1	2	8	1	1	2	8	8	8	8	2	8	1	8	1	1	1	1	2	1	2	1	1	1
2015.01.07	A876906304	A8769063	2012	1	1	1	A876	2	24	#NULL!	4	4	3	7	9113.58	9807.23	#NULL!	#NULL!	10766.1	17330.2	#NULL!	#NULL!	#NULL!	#NULL!	512	1	2	8	1	2	2	8	8	8	8	2	8	1	8	2	8	2	8	8	8	8	1	1	1
2015.01.07	A876906602	A8769066	2012	1	1	1	A876	2	51	#NULL!	2	3	4	7	9113.58	11250.5	21607.4	24972.2	8223.76	15085.4	46872.3	21873.6	33485.6	48053.1	512	1	2	8	2	8	2	8	2	8	8	2	8	1	8	2	8	2	8	8	8	8	1	1	1
2015.01.07	A876906603	A8769066	2012	1	1	1	A876	1	19	#NULL!	2	3	3	7	9113.58	18117	#NULL!	39983.9	14370.9	21930	#NULL!	#NULL!	39103.3	#NULL!	512	1	2	8	2	8	2	8	8	8	8	2	8	1	8	2	8	2	8	8	8	8	1	1	1
2015.01.07	A876908702	A8769087	2012	1	1	1	A876	2	39	#NULL!	2	3	4	5	9113.58	15663.4	#NULL!	#NULL!	13195.5	16527.9	#NULL!	#NULL!	#NULL!	#NULL!	512	1	2	8	2	8	2	8	8	8	8	2	8	1	8	2	8	2	8	8	8	8	1	1	1
2015.01.07	A876908703	A8769087	2012	1	1	1	A876	2	13	#NULL!	2	3	1	#NULL!	9113.58	6623.52	#NULL!	#NULL!	10708.1	14144.7	#NULL!	#NULL!	#NULL!	#NULL!	512	1	2	8	2	8	2	8	8	8	8	8	8	1	8	2	8	2	8	8	8	8	1	1	1
2015.01.07	A876908704	A8769087	2012	1	1	1	A876	1	11	#NULL!	2	3	1	#NULL!	9113.58	6116.61	#NULL!	#NULL!	6225.7	15879.7	#NULL!	#NULL!	#NULL!	#NULL!	512	1	2	8	2	8	2	8	8	8	8	8	8	8	8	8	8	2	8	8	8	8	1	1	1
2015.01.07	A876909901	A8769099	2012	1	1	1	A876	2	59	#NULL!	1	1	3	6	9113.58	6757.97	8439.96	#NULL!	8126.17	8423.65	#NULL!	8457.55	#NULL!	#NULL!	512	1	2	8	2	8	2	8	2	8	8	2	8	1	8	2	8	2	8	8	8	8	1	1	1
2015.01.07	A876910501	A8769105	2012	1	1	1	A876	1	76	#NULL!	2	1	1	7	9113.58	4778.69	#NULL!	#NULL!	#NULL!	#NULL!	#NULL!	#NULL!	#NULL!	#NULL!	512	1	2	8	2	8	2	8	2	8	8	2	8	1	8	2	8	2	8	8	8	8	1	1	1
2015.01.07	A876911101	A8769111	2012	1	1	1	A876	1	30	#NULL!	4	4	3	1	9113.58	19788.9	#NULL!	43735.1	21278.4	24829.6	#NULL!	#NULL!	68559.2	#NULL!	512	1	2	8	2	8	2	8	8	8	8	2	8	1	8	2	8	2	8	8	8	8	1	1	1
2015.01.07	A876911102	A8769111	2012	1	1	1	A876	2	57	#NULL!	4	4	3	7	9113.58	6757.97	8439.96	#NULL!	8126.17	8423.65	#NULL!	8457.55	#NULL!	#NULL!	512	1	2	8	2	8	2	8	2	8	8	2	8	2	3	2	8	2	8	8	8	8	1	1	1
2015.01.07	A876911103	A8769111	2012	1	1	1	A876	2	28	#NULL!	4	4	4	1	9113.58	10563.9	#NULL!	22600.8	12362.6	16596.8	#NULL!	#NULL!	31555.2	#NULL!	512	1	2	8	2	8	2	8	8	8	8	2	8	1	8	2	8	2	8	8	8	8	1	1	1
2015.01.07	A876914101	A8769141	2012	1	1	1	A876	1	75	#NULL!	2	1	1	7	9113.58	7168.04	7666.39	#NULL!	7525.62	8711.2	#NULL!	7614.54	#NULL!	#NULL!	512	1	2	8	2	8	2	8	1	3	2	2	8	2	3	1	1	2	8	8	8	8	1	1	1
2015.01.07	A876914102	A8769141	2012	1	1	1	A876	2	67	#NULL!	1	1	1	7	9113.58	6618.65	5775.2	29245.5	7757.2	7997.89	24011.2	5480.21	37388.1	22632.1	512	1	2	8	2	8	2	8	2	8	8	2	8	1	8	1	2	2	8	8	8	8	1	1	1
2015.01.07	A876914401	A8769144	2012	1	1	1	A876	1	56	#NULL!	3	4	3	5	9113.58	17602	12464.1	41288.3	13734.8	19880.6	34269.6	12881.2	52969.3	32388	512	1	2	8	2	8	2	8	2	8	8	2	8	1	8	2	8	2	8	8	8	8	1	1	1
2015.01.07	A876914402	A8769144	2012	1	1	1	A876	2	56	#NULL!	3	4	3	5	9113.58	10137	8439.96	#NULL!	8126.17	12635.5	#NULL!	8457.55	#NULL!	#NULL!	512	1	2	8	2	8	2	8	2	8	8	2	8	2	3	1	1	2	8	8	8	8	1	1	2
2015.01.07	A876915901	A8769159	2012	1	1	1	A876	1	76	#NULL!	2	1	1	7	9113.58	7168.04	11499.6	#NULL!	7525.62	8711.2	#NULL!	11421.8	#NULL!	#NULL!	512	1	2	8	2	8	2	8	2	8	8	2	8	1	8	2	8	1	1	1	1	2	2	2	1
2015.01.07	A876915902	A8769159	2012	1	1	1	A876	2	74	#NULL!	2	1	1	7	9113.58	9835.6	13097.4	#NULL!	10126.7	9410.17	#NULL!	12341.2	#NULL!	#NULL!	512	1	2	8	2	8	2	8	2	8	8	2	8	1	8	2	8	2	8	8	8	8	1	1	1
2015.01.07	A876917701	A8769177	2012	1	1	1	A876	2	28	#NULL!	4	4	#NULL!	#NULL!	9113.58	10563.9	#NULL!	#NULL!	12362.6	16596.8	#NULL!	#NULL!	#NULL!	#NULL!	512	1	2	8	2	8	2	8	8	8	8	2	8	1	8	2	8	2	8	8	8	8	1	1	1
2015.01.07	A876918001	A8769180	2012	1	1	1	A876	1	60	#NULL!	4	4	3	5	9113.58	12490.4	8546.51	#NULL!	16659.8	11152.5	#NULL!	8899.25	#NULL!	#NULL!	512	1	2	8	2	8	2	8	2	8	8	1	2	1	8	1	1	2	8	8	8	8	1	1	1
2015.01.07	A876918002	A8769180	2012	1	1	1	A876	2	59	#NULL!	4	4	2	3	9113.58	9010.63	8439.96	#NULL!	10834.9	11231.5	#NULL!	8457.55	#NULL!	#NULL!	512	1	2	8	2	8	2	8	2	8	8	2	8	1	8	2	8	2	8	8	8	8	1	1	1
2015.01.07	A876918004	A8769180	2012	1	1	1	A876	2	27	#NULL!	4	4	4	1	9113.58	14085.2	#NULL!	#NULL!	16483.5	20971.9	#NULL!	#NULL!	#NULL!	#NULL!	512	1	2	8	2	8	2	8	8	8	8	1	2	1	8	2	8	2	8	8	8	8	1	1	1
2015.01.07	A876918901	A8769189	2012	1	1	1	A876	1	49	#NULL!	2	3	4	5	9113.58	13514.3	19921.3	30188.8	19982.2	23463.9	55042.4	25564.7	71527.6	66912.4	512	1	1	2	2	8	2	8	2	8	8	2	8	1	8	2	8	2	8	8	8	8	2	1	1
2015.01.07	A876918902	A8769189	2012	1	1	1	A876	2	44	#NULL!	2	3	3	7	9113.58	7381.43	13219.5	#NULL!	8226.06	12227.7	#NULL!	12044.2	#NULL!	#NULL!	512	1	2	8	2	8	2	8	2	8	8	2	8	1	8	2	8	2	8	8	8	8	1	1	1
2015.01.07	A876918903	A8769189	2012	1	1	1	A876	2	20	#NULL!	2	3	3	7	9113.58	9807.23	#NULL!	24735.5	10766.1	17330.2	#NULL!	#NULL!	53578.9	#NULL!	512	1	2	8	1	2	2	8	8	8	8	2	8	1	8	2	8	1	2	2	2	2	2	1	1
2015.01.07	A876918904	A8769189	2012	1	1	1	A876	1	17	#NULL!	2	3	2	7	9113.58	13818.9	#NULL!	#NULL!	14370.9	21232.3	#NULL!	#NULL!	#NULL!	#NULL!	512	1	2	8	2	8	2	8	8	8	8	8	8	1	8	2	8	1	1	2	1	2	1	1	1
2015.01.07	A876918905	A8769189	2012	1	1	1	A876	1	16	#NULL!	2	3	2	7	9113.58	13818.9	#NULL!	#NULL!	14370.9	21232.3	#NULL!	#NULL!	#NULL!	#NULL!	512	1	2	8	2	8	2	8	8	8	8	8	8	1	8	2	8	2	8	8	8	8	1	1	1
2015.01.07	A876921003	A8769210	2012	1	1	1	A876	1	9	#NULL!	3	3	1	#NULL!	9113.58	5821.29	#NULL!	#NULL!	6024.28	9292.55	#NULL!	#NULL!	#NULL!	#NULL!	512	1	2	8	1	1	2	8	8	8	8	8	8	8	8	8	8	1	2	2	1	2	2	2	1
2015.01.07	A876921004	A8769210	2012	1	1	1	A876	1	5	60	3	3	1	#NULL!	9113.58	5821.29	#NULL!	#NULL!	6024.28	9292.55	#NULL!	#NULL!	#NULL!	#NULL!	512	1	2	8	2	8	2	8	8	8	8	8	8	8	8	8	8	8	8	8	8	8	8	8	8
2015.01.07	A876921602	A8769216	2012	1	1	1	A876	2	77	#NULL!	4	3	4	7	9113.58	6346.35	17463.2	#NULL!	6089.68	6273.45	#NULL!	16454.9	#NULL!	#NULL!	512	1	2	8	2	8	2	8	2	8	8	2	8	1	8	2	8	2	8	8	8	8	1	1	1
2015.01.07	A876926101	A8769261	2012	1	1	1	A876	1	59	#NULL!	#NULL!	#NULL!	4	5	9113.58	12543.1	12464.1	#NULL!	18998.1	19880.6	#NULL!	12881.2	#NULL!	#NULL!	512	1	2	8	2	8	2	8	2	8	8	2	8	1	8	2	8	2	8	8	8	8	1	1	1
2015.01.07	A876926102	A8769261	2012	1	1	1	A876	2	56	#NULL!	#NULL!	#NULL!	3	5	9113.58	6757.97	8439.96	#NULL!	12189.3	12635.5	#NULL!	8457.55	#NULL!	#NULL!	512	1	2	8	2	8	2	8	1	3	2	2	8	1	8	2	8	2	8	8	8	8	1	1	1
2015.01.07	A876926103	A8769261	2012	1	1	1	A876	1	28	#NULL!	#NULL!	#NULL!	3	1	9113.58	16028.8	#NULL!	47372.5	#NULL!	#NULL!	#NULL!	#NULL!	#NULL!	#NULL!	512	1	2	8	2	8	2	8	8	8	8	2	8	1	8	2	8	1	2	2	1	2	2	2	1
2015.01.07	A876927901	A8769279	2012	1	1	1	A876	2	33	#NULL!	3	3	4	1	9113.58	11243.6	#NULL!	20431	#NULL!	#NULL!	#NULL!	#NULL!	#NULL!	#NULL!	512	1	2	8	2	8	2	8	8	8	8	2	8	1	8	2	8	2	8	8	8	8	1	1	1
2015.01.07	A876931201	A8769312	2012	1	1	1	A876	1	65	#NULL!	1	1	3	7	9113.58	5916.23	7688.66	9444.04	7097.87	6893.96	15241	7373.18	12234.2	14957.6	512	1	2	8	2	8	2	8	2	8	8	2	8	2	3	2	8	2	8	8	8	8	1	1	1
2015.01.07	A876931202	A8769312	2012	1	1	1	A876	2	58	#NULL!	1	1	3	7	9113.58	6757.97	8439.96	16365.9	8126.17	8423.65	22029.7	8457.55	20398.3	21376.3	512	1	2	8	2	8	2	8	1	2	2	2	8	1	8	2	8	1	1	2	2	2	1	1	1
2015.01.07	A877907801	A8779078	2012	1	1	2	A877	1	43	#NULL!	4	4	4	2	2435.5	4000.07	#NULL!	#NULL!	#NULL!	#NULL!	#NULL!	#NULL!	#NULL!	#NULL!	501	1	2	8	2	8	2	8	2	8	8	2	8	2	3	2	8	2	8	8	8	8	1	1	1
2015.01.07	A877907802	A8779078	2012	1	1	2	A877	2	44	#NULL!	4	4	3	7	2435.5	1972.61	#NULL!	14459.6	#NULL!	#NULL!	#NULL!	#NULL!	#NULL!	#NULL!	501	1	2	8	2	8	2	8	2	8	8	2	8	1	8	2	8	2	8	8	8	8	1	1	1
2015.01.07	A877907803	A8779078	2012	1	1	2	A877	1	18	#NULL!	4	4	2	7	2435.5	13001.3	#NULL!	18102.1	#NULL!	#NULL!	#NULL!	#NULL!	#NULL!	#NULL!	501	1	2	8	2	8	2	8	8	8	8	8	8	1	8	2	8	2	8	8	8	8	1	1	1
2015.01.07	A877907804	A8779078	2012	1	1	2	A877	1	15	#NULL!	4	4	2	7	2435.5	13001.3	#NULL!	#NULL!	#NULL!	#NULL!	#NULL!	#NULL!	#NULL!	#NULL!	501	1	2	8	2	8	2	8	8	8	8	8	8	1	8	2	8	2	8	8	8	8	1	1	1
2015.01.07	A877908402	A8779084	2012	1	1	2	A877	2	37	#NULL!	4	4	4	1	2435.5	3139.39	#NULL!	#NULL!	#NULL!	#NULL!	#NULL!	#NULL!	#NULL!	#NULL!	501	1	2	8	2	8	2	8	8	8	8	2	8	1	8	2	8	2	8	8	8	8	1	1	1
2015.01.07	A877908403	A8779084	2012	1	1	2	A877	2	4	55	4	4	1	#NULL!	2435.5	2497.67	#NULL!	#NULL!	2727.04	5918.79	#NULL!	#NULL!	#NULL!	#NULL!	501	1	2	8	2	8	2	8	8	8	8	8	8	8	8	8	8	8	8	8	8	8	8	8	8
2015.01.07	A877908404	A8779084	2012	1	1	2	A877	2	70	#NULL!	4	4	3	7	2435.5	2628.46	#NULL!	#NULL!	5056.68	3132.58	#NULL!	#NULL!	#NULL!	#NULL!	501	1	2	8	2	8	2	8	1	2	2	2	8	1	8	2	8	2	8	8	8	8	1	1	1
2015.01.07	A877909601	A8779096	2012	1	1	2	A877	1	57	#NULL!	4	4	4	1	2435.5	3352.01	3769.3	10013.9	3429.17	3309.06	8636.29	3895.42	11657.4	8162.12	501	1	2	8	1	1	2	8	2	8	8	2	8	1	8	2	8	2	8	8	8	8	1	1	1
2015.01.07	A877909602	A8779096	2012	1	1	2	A877	2	48	#NULL!	4	4	4	7	2435.5	3179.54	4520.76	#NULL!	3173.23	3523.69	#NULL!	4347.35	#NULL!	#NULL!	501	1	2	8	2	8	2	8	2	8	8	2	8	1	8	2	8	2	8	8	8	8	1	1	1
2015.01.07	A877910801	A8779108	2012	1	1	2	A877	1	75	#NULL!	3	1	3	6	2435.5	1277.05	#NULL!	#NULL!	1252.61	1449.95	#NULL!	#NULL!	#NULL!	#NULL!	501	1	2	8	2	8	2	8	2	8	8	2	8	1	8	2	8	2	8	8	8	8	1	1	1
2015.01.07	A877910802	A8779108	2012	1	1	2	A877	2	72	#NULL!	3	1	2	7	2435.5	1752.3	#NULL!	#NULL!	1685.56	1566.29	#NULL!	#NULL!	#NULL!	#NULL!	501	1	2	8	2	8	2	8	2	8	8	2	8	1	8	2	8	2	8	8	8	8	1	1	1
2015.01.07	A877911102	A8779111	2012	1	1	2	A877	2	63	#NULL!	4	4	4	7	2435.5	1842.21	2077.48	4712.91	1795.05	1589.47	4385.25	2019.94	5642.46	4260.89	501	1	2	8	2	8	2	8	2	8	8	2	8	2	3	2	8	2	8	8	8	8	1	1	1
2015.01.07	A877911702	A8779117	2012	1	1	2	A877	2	40	#NULL!	4	4	4	7	2435.5	3945.21	7995.48	#NULL!	3080.7	6105.77	#NULL!	7284.64	#NULL!	#NULL!	501	1	2	8	2	8	2	8	2	8	8	2	8	1	8	2	8	2	8	8	8	8	1	1	1
2015.01.07	A877911704	A8779117	2012	1	1	2	A877	1	7	#NULL!	4	4	1	#NULL!	2435.5	1564.83	#NULL!	#NULL!	1943.27	4640.13	#NULL!	#NULL!	#NULL!	#NULL!	501	1	2	8	2	8	2	8	8	8	8	8	8	8	8	8	8	2	8	8	8	8	1	1	1
2015.01.07	A877912901	A8779129	2012	1	1	2	A877	1	32	#NULL!	3	4	4	1	2435.5	6062.92	#NULL!	#NULL!	6428.02	9288.97	#NULL!	#NULL!	#NULL!	#NULL!	501	1	2	8	2	8	2	8	8	8	8	2	8	1	8	2	8	2	8	8	8	8	1	1	1
2015.01.07	A877912902	A8779129	2012	1	1	2	A877	2	30	#NULL!	4	4	4	7	2435.5	3004.74	#NULL!	#NULL!	2933.88	3595.8	#NULL!	#NULL!	#NULL!	#NULL!	501	1	2	8	2	8	2	8	8	8	8	2	8	1	8	2	8	2	8	8	8	8	1	1	1
2015.01.07	A877914401	A8779144	2012	1	1	2	A877	1	40	#NULL!	4	4	4	1	2435.5	4000.07	7668.74	8379.76	9589.34	24074.7	8736.79	10628.4	27380	12222.2	501	1	2	8	2	8	2	8	2	8	8	2	8	1	8	2	8	2	8	8	8	8	1	1	1
2015.01.07	A877914402	A8779144	2012	1	1	2	A877	2	39	#NULL!	4	4	4	1	2435.5	2092.93	#NULL!	7179.78	#NULL!	#NULL!	#NULL!	#NULL!	#NULL!	#NULL!	501	1	2	8	2	8	2	8	8	8	8	2	8	1	8	2	8	2	8	8	8	8	1	1	1
2015.01.07	A877914403	A8779144	2012	1	1	2	A877	1	9	#NULL!	4	4	1	#NULL!	2435.5	1564.83	#NULL!	#NULL!	#NULL!	#NULL!	#NULL!	#NULL!	#NULL!	#NULL!	501	1	2	8	2	8	2	8	8	8	8	8	8	8	8	8	8	1	1	1	1	2	1	1	1
2015.01.07	A877914404	A8779144	2012	1	1	2	A877	1	7	#NULL!	4	4	1	#NULL!	2435.5	1564.83	#NULL!	#NULL!	#NULL!	#NULL!	#NULL!	#NULL!	#NULL!	#NULL!	501	1	2	8	2	8	2	8	8	8	8	8	8	8	8	8	8	2	8	8	8	8	1	1	1
2015.01.07	A877914405	A8779144	2012	1	1	2	A877	1	1	22	4	4	1	#NULL!	2435.5	1621.91	#NULL!	#NULL!	#NULL!	#NULL!	#NULL!	#NULL!	#NULL!	#NULL!	501	1	8	8	8	8	8	8	8	8	8	8	8	8	8	8	8	8	8	8	8	8	8	8	8
2015.01.07	A877916201	A8779162	2012	1	1	2	A877	1	45	#NULL!	1	2	#NULL!	#NULL!	2435.5	3611.55	12048.9	#NULL!	5564.5	9531.98	#NULL!	15462.1	#NULL!	#NULL!	501	1	2	8	2	8	2	8	2	8	8	2	8	1	8	2	8	2	8	8	8	8	1	1	1
2015.01.07	A877916202	A8779162	2012	1	1	2	A877	2	41	#NULL!	2	2	3	7	2435.5	1972.61	#NULL!	#NULL!	2053.8	4070.51	#NULL!	#NULL!	#NULL!	#NULL!	501	1	2	8	2	8	2	8	2	8	8	2	8	1	8	2	8	2	8	8	8	8	1	1	1
2015.01.07	A877916204	A8779162	2012	1	1	2	A877	1	10	#NULL!	2	2	1	#NULL!	2435.5	1644.21	#NULL!	#NULL!	2008.24	3964.69	#NULL!	#NULL!	#NULL!	#NULL!	501	1	2	8	2	8	2	8	8	8	8	8	8	8	8	8	8	2	8	8	8	8	1	1	1
2015.01.07	A877917401	A8779174	2012	1	1	2	A877	1	39	#NULL!	2	3	4	1	2435.5	3219.88	#NULL!	14715.4	3334.78	5575.13	#NULL!	#NULL!	18425.2	#NULL!	501	1	2	8	2	8	2	8	8	8	8	2	8	1	8	2	8	2	8	8	8	8	1	1	1
2015.01.07	A877917402	A8779174	2012	1	1	2	A877	2	38	#NULL!	2	3	4	2	2435.5	2092.93	#NULL!	#NULL!	2196.34	3094.89	#NULL!	#NULL!	#NULL!	#NULL!	501	1	2	8	2	8	2	8	8	8	8	2	8	1	8	2	8	2	8	8	8	8	1	1	1
2015.01.07	A877917403	A8779174	2012	1	1	2	A877	1	11	#NULL!	2	3	1	#NULL!	2435.5	1644.21	#NULL!	#NULL!	2008.24	2973.51	#NULL!	#NULL!	#NULL!	#NULL!	501	1	2	8	2	8	2	8	8	8	8	8	8	8	8	8	8	2	8	8	8	8	1	1	1
2015.01.07	A877917404	A8779174	2012	1	1	2	A877	2	10	#NULL!	2	3	1	#NULL!	2435.5	1780.47	#NULL!	13331.4	1817.98	2648.63	#NULL!	#NULL!	8882.78	#NULL!	501	1	2	8	2	8	2	8	8	8	8	8	8	8	8	8	8	2	8	8	8	8	1	1	1
2015.01.07	A877917405	A8779174	2012	1	1	2	A877	1	7	#NULL!	2	3	1	#NULL!	2435.5	1564.83	#NULL!	#NULL!	1943.27	2320.07	#NULL!	#NULL!	#NULL!	#NULL!	501	1	2	8	2	8	2	8	8	8	8	8	8	8	8	8	8	2	8	8	8	8	1	1	1
2015.01.07	A877917701	A8779177	2012	1	1	2	A877	2	36	#NULL!	4	4	4	1	2435.5	2092.93	#NULL!	#NULL!	2196.34	3094.89	#NULL!	#NULL!	#NULL!	#NULL!	501	1	2	8	2	8	2	8	8	8	8	2	8	1	8	2	8	2	8	8	8	8	1	1	1
2015.01.07	A877918601	A8779186	2012	1	1	2	A877	1	41	#NULL!	2	3	#NULL!	#NULL!	2435.5	4000.07	7668.74	#NULL!	#NULL!	#NULL!	#NULL!	#NULL!	#NULL!	#NULL!	501	1	2	8	2	8	2	8	2	8	8	2	8	1	8	2	8	2	8	8	8	8	1	1	1
2015.01.07	A877918602	A8779186	2012	1	1	2	A877	2	34	#NULL!	2	3	4	2	2435.5	3004.74	#NULL!	#NULL!	4400.83	4494.75	#NULL!	#NULL!	#NULL!	#NULL!	501	1	2	8	2	8	2	8	8	8	8	2	8	1	8	1	1	2	8	8	8	8	1	1	1
2015.01.07	A877918603	A8779186	2012	1	1	2	A877	2	6	73	2	3	1	#NULL!	2435.5	2335.75	#NULL!	#NULL!	2679.3	3719.72	#NULL!	#NULL!	#NULL!	#NULL!	501	1	2	8	2	8	2	8	8	8	8	8	8	8	8	8	8	1	1	1	1	2	1	1	1
2015.01.07	A877918604	A8779186	2012	1	1	2	A877	1	5	61	2	3	1	#NULL!	2435.5	1564.83	#NULL!	#NULL!	1943.27	2900.08	#NULL!	#NULL!	#NULL!	#NULL!	501	1	2	8	2	8	1	2	8	8	8	8	8	8	8	8	8	8	8	8	8	8	8	8	8
2015.01.07	A877918607	A8779186	2012	1	1	2	A877	2	62	#NULL!	3	3	2	7	2435.5	1842.21	2077.48	#NULL!	2692.58	1986.84	#NULL!	4039.87	#NULL!	#NULL!	501	1	2	8	2	8	2	8	2	8	8	2	8	1	8	2	8	2	8	8	8	8	1	1	1
2015.01.07	A877921601	A8779216	2012	1	1	2	A877	1	51	#NULL!	4	4	4	1	2435.5	4668.34	5473.69	#NULL!	9362.3	10518	#NULL!	6304.12	#NULL!	#NULL!	501	1	2	8	2	8	1	2	1	3	2	2	8	1	8	2	8	2	8	8	8	8	1	1	1
2015.01.07	A877921602	A8779216	2012	1	1	2	A877	2	46	#NULL!	4	4	4	6	2435.5	3179.54	4520.76	#NULL!	6346.46	7047.38	#NULL!	4347.35	#NULL!	#NULL!	501	1	2	8	1	2	2	8	2	8	8	2	8	1	8	2	8	2	8	8	8	8	1	1	1
2015.01.07	A877921603	A8779216	2012	1	1	2	A877	2	19	#NULL!	4	4	3	7	2435.5	2983.62	#NULL!	#NULL!	#NULL!	#NULL!	#NULL!	#NULL!	#NULL!	#NULL!	501	1	2	8	2	8	2	8	8	8	8	2	8	1	8	2	8	2	8	8	8	8	1	1	1
2015.01.07	A877924001	A8779240	2012	1	1	2	A877	1	38	#NULL!	4	4	4	2	2435.5	3219.88	#NULL!	#NULL!	3334.78	5575.13	#NULL!	#NULL!	#NULL!	#NULL!	501	1	2	8	1	2	2	8	8	8	8	2	8	1	8	2	8	2	8	8	8	8	1	1	1
2015.01.07	A877924002	A8779240	2012	1	1	2	A877	2	38	#NULL!	4	4	4	7	2435.5	2092.93	#NULL!	#NULL!	2196.34	3094.89	#NULL!	#NULL!	#NULL!	#NULL!	501	1	2	8	2	8	2	8	8	8	8	2	8	1	8	2	8	2	8	8	8	8	1	1	1
2015.01.07	A877924003	A8779240	2012	1	1	2	A877	1	3	42	4	4	1	#NULL!	2435.5	1621.91	#NULL!	#NULL!	3334.14	2210.59	#NULL!	#NULL!	#NULL!	#NULL!	501	1	8	8	8	8	8	8	8	8	8	8	8	8	8	8	8	8	8	8	8	8	8	8	8
2015.01.07	A877924004	A8779240	2012	1	1	2	A877	2	3	42	4	4	1	#NULL!	2435.5	2497.67	#NULL!	#NULL!	4545.07	2959.39	#NULL!	#NULL!	#NULL!	#NULL!	501	1	8	8	8	8	8	8	8	8	8	8	8	8	8	8	8	8	8	8	8	8	8	8	8
2015.01.07	A877925201	A8779252	2012	1	1	2	A877	1	47	#NULL!	4	4	4	1	2435.5	3611.55	6024.44	#NULL!	#NULL!	#NULL!	#NULL!	#NULL!	#NULL!	#NULL!	501	1	2	8	2	8	2	8	2	8	8	2	8	1	8	2	8	2	8	8	8	8	1	1	1
2015.01.07	A877925202	A8779252	2012	1	1	2	A877	2	44	#NULL!	4	4	4	7	2435.5	1972.61	3997.74	14459.6	3080.7	4579.33	14395.8	7284.64	11335.9	12843.6	501	1	2	8	2	8	2	8	2	8	8	2	8	1	8	2	8	2	8	8	8	8	1	1	1
2015.01.07	A877925203	A8779252	2012	1	1	2	A877	1	15	#NULL!	4	4	1	7	2435.5	13001.3	#NULL!	9051.03	5381.95	7951.58	#NULL!	#NULL!	12908.7	#NULL!	501	1	2	8	2	8	2	8	8	8	8	8	8	1	8	2	8	2	8	8	8	8	1	1	1
2015.01.07	A877927302	A8779273	2012	1	1	2	A877	2	30	#NULL!	4	4	4	1	2435.5	6009.48	#NULL!	#NULL!	2933.88	7191.61	#NULL!	#NULL!	#NULL!	#NULL!	501	1	2	8	2	8	2	8	8	8	8	2	8	1	8	1	1	2	8	8	8	8	1	1	1
2015.01.07	A877928801	A8779288	2012	1	1	2	A877	2	75	#NULL!	4	3	2	7	2435.5	1695.99	2640.55	#NULL!	1520.41	1566.29	#NULL!	2488.08	#NULL!	#NULL!	501	1	2	8	2	8	2	8	2	8	8	2	8	1	8	2	8	2	8	8	8	8	1	1	1
2015.01.07	A877931201	A8779312	2012	1	1	2	A877	2	51	#NULL!	3	3	4	3	2435.5	2004.38	3267.18	9085	3079.83	3766.36	5906.15	3307.42	22108.4	6054.94	501	1	2	8	2	8	2	8	2	8	8	2	8	1	8	2	8	2	8	8	8	8	1	1	1
2015.01.07	A877931202	A8779312	2012	1	1	2	A877	1	24	#NULL!	3	3	3	1	2435.5	8641.26	#NULL!	10601.4	#NULL!	#NULL!	#NULL!	#NULL!	#NULL!	#NULL!	501	1	2	8	2	8	2	8	8	8	8	2	8	1	8	2	8	2	8	8	8	8	1	1	1
2015.01.07	A877931203	A8779312	2012	1	1	2	A877	1	23	#NULL!	3	3	3	1	2435.5	8641.26	#NULL!	#NULL!	16035.4	18185.6	#NULL!	#NULL!	#NULL!	#NULL!	501	1	2	8	1	2	2	8	8	8	8	2	8	1	8	2	8	2	8	8	8	8	1	1	1
2015.01.07	A878904201	A8789042	2012	1	1	2	A878	1	64	#NULL!	4	4	4	3	2664.4	2738.72	2487.13	#NULL!	#NULL!	#NULL!	#NULL!	#NULL!	#NULL!	#NULL!	501	1	2	8	1	2	2	8	2	8	8	2	8	1	8	2	8	1	1	1	1	2	1	1	1
2015.01.07	A878904202	A8789042	2012	1	1	2	A878	2	56	#NULL!	4	4	4	1	2664.4	1975.73	2456.13	9625.59	4685.7	4857.23	17095.8	5625.71	11664	20735.9	501	1	2	8	1	2	2	8	2	8	8	2	8	2	3	1	2	1	2	2	1	2	2	1	1
2015.01.07	A878904203	A8789042	2012	1	1	2	A878	2	28	#NULL!	4	4	4	2	2664.4	3088.41	#NULL!	#NULL!	#NULL!	#NULL!	#NULL!	#NULL!	#NULL!	#NULL!	501	1	2	8	1	2	2	8	8	8	8	2	8	1	8	2	8	1	1	1	2	1	1	1	1
2015.01.07	A878904204	A8789042	2012	1	1	2	A878	1	26	#NULL!	4	4	4	7	2664.4	4686.11	#NULL!	9287.39	13286.4	21670	#NULL!	#NULL!	15661.5	#NULL!	501	1	2	8	1	2	2	8	8	8	8	2	8	1	8	2	8	1	1	2	2	1	1	1	1
2015.01.07	A878905101	A8789051	2012	1	1	2	A878	1	60	#NULL!	2	3	4	3	2664.4	5477.45	3730.7	12427.6	4803.18	4823.06	16784.9	4439.64	15771.3	21248.6	501	1	2	8	2	8	2	8	2	8	8	1	2	1	8	2	8	1	2	2	2	1	1	1	1
2015.01.07	A878905102	A8789051	2012	1	1	2	A878	2	53	#NULL!	2	3	3	7	2664.4	4385.51	4716.01	#NULL!	3161.31	5799	#NULL!	5456.11	#NULL!	#NULL!	501	1	2	8	2	8	2	8	1	3	2	2	8	1	8	2	8	2	8	8	8	8	1	1	1
2015.01.07	A878907201	A8789072	2012	1	1	2	A878	1	74	#NULL!	3	2	4	7	2664.4	1348.95	2231.01	#NULL!	1478.31	1674.34	#NULL!	2532.48	#NULL!	#NULL!	501	1	2	8	2	8	2	8	2	8	8	2	8	1	8	2	8	1	1	2	2	1	1	1	1
2015.01.07	A878907202	A8789072	2012	1	1	2	A878	2	66	#NULL!	3	2	4	7	2664.4	1290	1680.65	#NULL!	1490.98	1537.24	#NULL!	1822.64	#NULL!	#NULL!	501	1	2	8	2	8	2	8	2	8	8	2	8	2	3	2	8	2	8	8	8	8	1	1	1
2015.01.07	A878908402	A8789084	2012	1	1	2	A878	2	47	#NULL!	3	4	4	5	2664.4	10435.1	8700.66	#NULL!	7328.66	16276.1	#NULL!	9562.21	#NULL!	#NULL!	501	1	2	8	2	8	2	8	2	8	8	2	8	1	8	2	8	1	2	1	1	2	1	1	1
2015.01.07	A878908701	A8789087	2012	1	1	2	A878	2	60	#NULL!	3	3	4	7	2664.4	2015.35	1999.16	#NULL!	2072.86	1835.46	#NULL!	2221.47	#NULL!	#NULL!	501	1	2	8	2	8	1	2	2	8	8	2	8	1	8	2	8	2	8	8	8	8	1	1	1
2015.01.07	A878910201	A8789102	2012	1	1	2	A878	1	44	#NULL!	4	4	4	1	2664.4	4376.01	#NULL!	#NULL!	5536.7	9664.67	#NULL!	#NULL!	#NULL!	#NULL!	501	1	2	8	2	8	2	8	2	8	8	2	8	1	8	2	8	1	1	1	1	2	1	1	1
2015.01.07	A878910202	A8789102	2012	1	1	2	A878	2	44	#NULL!	4	4	4	7	2664.4	2158	#NULL!	11688.1	2371.65	3525.36	#NULL!	#NULL!	13090.3	#NULL!	501	1	1	2	1	1	2	8	2	8	8	2	8	1	8	2	8	1	1	2	1	2	1	1	1
2015.01.07	A878910203	A8789102	2012	1	1	2	A878	2	15	#NULL!	4	4	2	7	2664.4	6201.67	#NULL!	#NULL!	3900.62	6055.19	#NULL!	#NULL!	#NULL!	#NULL!	501	1	2	8	1	2	2	8	8	8	8	8	8	1	8	2	8	2	8	8	8	8	1	1	1
2015.01.07	A878910204	A8789102	2012	1	1	2	A878	2	10	#NULL!	4	4	1	#NULL!	2664.4	2570.03	#NULL!	11545.9	2915.74	3058.54	#NULL!	#NULL!	7693.12	#NULL!	501	1	2	8	1	2	2	8	8	8	8	8	8	8	8	8	8	1	1	2	2	2	1	1	1
2015.01.07	A878912902	A8789129	2012	1	1	2	A878	2	40	#NULL!	3	4	4	1	2664.4	4316	7694.06	#NULL!	#NULL!	#NULL!	#NULL!	#NULL!	#NULL!	#NULL!	501	1	2	8	2	8	2	8	2	8	8	2	8	1	8	2	8	1	1	1	1	2	1	1	1
2015.01.07	A878914401	A8789144	2012	1	1	2	A878	1	66	#NULL!	#NULL!	#NULL!	4	6	2664.4	1729.64	2237.49	#NULL!	2046.38	1987.59	#NULL!	2452.21	#NULL!	#NULL!	501	1	2	8	2	8	2	8	2	8	8	1	2	1	8	2	8	2	8	8	8	8	1	1	1
2015.01.07	A878914402	A8789144	2012	1	1	2	A878	2	62	#NULL!	#NULL!	#NULL!	4	7	2664.4	2015.35	1999.16	#NULL!	2072.86	1835.46	#NULL!	2221.47	#NULL!	#NULL!	501	1	2	8	2	8	1	2	2	8	8	1	2	1	8	1	2	2	8	8	8	8	1	1	1
2015.01.07	A878914403	A8789144	2012	1	1	2	A878	1	35	#NULL!	#NULL!	#NULL!	4	1	2664.4	3522.5	#NULL!	#NULL!	3850.87	6437.95	#NULL!	#NULL!	#NULL!	#NULL!	501	1	2	8	2	8	2	8	8	8	8	2	8	1	8	2	8	1	2	1	1	2	1	1	1
2015.01.07	A878914404	A8789144	2012	1	1	2	A878	2	37	#NULL!	#NULL!	#NULL!	4	7	2664.4	2289.63	#NULL!	#NULL!	2536.25	3573.86	#NULL!	#NULL!	#NULL!	#NULL!	501	1	2	8	1	1	2	8	8	8	8	2	8	1	8	2	8	1	1	2	1	1	1	1	1
2015.01.07	A878914405	A8789144	2012	1	1	2	A878	2	6	72	#NULL!	#NULL!	1	#NULL!	2664.4	3371.54	#NULL!	#NULL!	4297.16	3436.31	#NULL!	#NULL!	#NULL!	#NULL!	501	1	2	8	1	2	2	8	8	8	8	8	8	8	8	8	8	2	8	8	8	8	1	1	1
2015.01.07	A878914406	A8789144	2012	1	1	2	A878	2	2	28	#NULL!	#NULL!	1	#NULL!	2664.4	3605.26	#NULL!	#NULL!	2624.24	3417.39	#NULL!	#NULL!	#NULL!	#NULL!	501	1	8	8	8	8	8	8	8	8	8	8	8	8	8	8	8	8	8	8	8	8	8	8	8
2015.01.07	A878915901	A8789159	2012	1	1	2	A878	2	60	#NULL!	4	4	3	1	2664.4	2687.14	1999.16	#NULL!	4145.71	3670.93	#NULL!	2221.47	#NULL!	#NULL!	501	1	2	8	2	8	2	8	2	8	8	2	8	1	8	2	8	2	8	8	8	8	1	1	1
2015.01.07	A878915903	A8789159	2012	1	1	2	A878	1	31	#NULL!	4	4	3	3	2664.4	8843.65	#NULL!	#NULL!	#NULL!	#NULL!	#NULL!	#NULL!	#NULL!	#NULL!	501	1	2	8	2	8	2	8	8	8	8	2	8	1	8	2	8	1	2	1	1	1	1	1	1
2015.01.07	A878915904	A8789159	2012	1	1	2	A878	2	29	#NULL!	4	4	4	1	2664.4	4117.88	#NULL!	17723.6	7128.49	9570.03	#NULL!	#NULL!	24058.2	#NULL!	501	1	2	8	2	8	2	8	8	8	8	2	8	1	8	1	1	2	8	8	8	8	1	1	1
2015.01.07	A878918604	A8789186	2012	1	1	2	A878	1	66	#NULL!	4	4	3	7	2664.4	3459.28	2237.49	#NULL!	2046.38	3975.18	#NULL!	2452.21	#NULL!	#NULL!	501	1	2	8	2	8	2	8	1	2	2	2	8	1	8	1	2	1	1	1	1	2	1	1	1
2015.01.07	A878918605	A8789186	2012	1	1	2	A878	2	63	#NULL!	4	4	3	2	2664.4	4030.71	1999.16	#NULL!	2072.86	3670.93	#NULL!	2221.47	#NULL!	#NULL!	501	1	2	8	2	8	2	8	2	8	8	2	8	1	8	2	8	1	2	1	1	2	1	1	1
2015.01.07	A878919501	A8789195	2012	1	1	2	A878	2	68	#NULL!	3	2	1	7	2664.4	1290	1680.65	2866.79	1490.98	1537.24	4658.37	1822.64	3563.16	5488.52	501	1	2	8	2	8	2	8	2	8	8	2	8	2	3	2	8	2	8	8	8	8	1	1	1
2015.01.07	A878920102	A8789201	2012	1	1	2	A878	2	63	#NULL!	3	3	1	3	2664.4	4030.71	#NULL!	#NULL!	4145.71	3670.93	#NULL!	#NULL!	#NULL!	#NULL!	501	1	2	8	2	8	2	8	2	8	8	2	8	1	8	2	8	1	1	1	1	2	1	1	1
2015.01.07	A878921601	A8789216	2012	1	1	2	A878	1	66	#NULL!	3	2	4	1	2664.4	1729.64	2237.49	#NULL!	2046.38	1987.59	#NULL!	2452.21	#NULL!	#NULL!	501	1	2	8	2	8	2	8	2	8	8	1	2	1	8	2	8	2	8	8	8	8	1	1	1
2015.01.07	A878921602	A8789216	2012	1	1	2	A878	2	62	#NULL!	3	2	4	6	2664.4	2015.35	1999.16	#NULL!	2072.86	1835.46	#NULL!	2221.47	#NULL!	#NULL!	501	1	1	2	2	8	2	8	2	8	8	2	8	1	8	2	8	1	1	2	1	1	1	1	1
2015.01.07	A878921603	A8789216	2012	1	1	2	A878	2	31	#NULL!	2	2	3	7	2664.4	3287.14	#NULL!	18024.8	3387.94	4152.3	#NULL!	#NULL!	23070.6	#NULL!	501	1	2	8	2	8	2	8	8	8	8	2	8	1	8	2	8	1	2	2	1	2	1	1	1
2015.01.07	A878923101	A8789231	2012	1	1	2	A878	1	45	#NULL!	#NULL!	#NULL!	4	2	2664.4	3950.98	5797.33	11837.1	6425.67	8255.37	21357.3	8502.42	16818.3	32453.8	501	1	2	8	2	8	2	8	2	8	8	2	8	1	8	2	8	2	8	8	8	8	1	1	1
2015.01.07	A878923102	A8789231	2012	1	1	2	A878	2	41	#NULL!	#NULL!	#NULL!	4	7	2664.4	2158	3847.03	#NULL!	2371.65	3525.36	#NULL!	4005.72	#NULL!	#NULL!	501	1	2	8	1	2	2	8	2	8	8	2	8	1	8	2	8	1	2	2	2	1	1	1	1
2015.01.07	A878923103	A8789231	2012	1	1	2	A878	1	5	65	#NULL!	#NULL!	1	#NULL!	2664.4	2258.75	#NULL!	#NULL!	3116.69	2679.12	#NULL!	#NULL!	#NULL!	#NULL!	501	1	2	8	1	2	1	2	8	8	8	8	8	8	8	8	8	8	8	8	8	8	8	8	8
2015.01.07	A878923104	A8789231	2012	1	1	2	A878	1	2	27	#NULL!	#NULL!	1	#NULL!	2664.4	2341.16	#NULL!	#NULL!	1925.07	2552.7	#NULL!	#NULL!	#NULL!	#NULL!	501	1	8	8	8	8	8	8	8	8	8	8	8	8	8	8	8	8	8	8	8	8	8	8	8
2015.01.07	A878924601	A8789246	2012	1	1	2	A878	1	61	#NULL!	4	4	4	1	2664.4	4108.08	2487.13	#NULL!	5403.58	3617.29	#NULL!	2959.76	#NULL!	#NULL!	501	1	2	8	2	8	2	8	1	3	2	2	8	1	8	2	8	2	8	8	8	8	1	1	1
2015.01.07	A878924602	A8789246	2012	1	1	2	A878	2	58	#NULL!	4	4	3	7	2664.4	2963.59	2456.13	#NULL!	3514.27	3642.92	#NULL!	2812.85	#NULL!	#NULL!	501	1	2	8	2	8	2	8	2	8	8	2	8	1	8	2	8	2	8	8	8	8	1	1	1
2015.01.07	A878926102	A8789261	2012	1	1	2	A878	2	52	#NULL!	2	3	2	5	2664.4	4385.51	#NULL!	#NULL!	9483.93	11598	#NULL!	#NULL!	#NULL!	#NULL!	501	1	2	8	2	8	2	8	2	8	8	2	8	1	8	2	8	1	1	1	1	2	1	1	1
2015.01.07	A878926103	A8789261	2012	1	1	2	A878	2	27	#NULL!	2	3	4	7	2664.4	6176.82	#NULL!	17723.6	#NULL!	#NULL!	#NULL!	#NULL!	#NULL!	#NULL!	501	1	1	2	2	8	2	8	8	8	8	1	1	1	8	1	1	1	1	2	1	2	1	1	1
2015.01.07	A878927001	A8789270	2012	1	1	2	A878	1	41	#NULL!	4	4	4	1	2664.4	4376.01	7379.64	13547.3	#NULL!	#NULL!	13451.9	#NULL!	#NULL!	#NULL!	501	1	2	8	2	8	2	8	2	8	8	2	8	1	8	2	8	2	8	8	8	8	1	1	1
2015.01.07	A878927002	A8789270	2012	1	1	2	A878	2	34	#NULL!	4	4	3	2	2664.4	3287.14	#NULL!	#NULL!	#NULL!	#NULL!	#NULL!	#NULL!	#NULL!	#NULL!	501	1	2	8	2	8	2	8	8	8	8	2	8	1	8	1	1	2	8	8	8	8	1	1	1
2015.01.07	A878927003	A8789270	2012	1	1	2	A878	1	11	#NULL!	4	4	1	#NULL!	2664.4	2373.34	#NULL!	12606.4	#NULL!	#NULL!	#NULL!	#NULL!	#NULL!	#NULL!	501	1	2	8	2	8	2	8	8	8	8	8	8	8	8	8	8	2	8	8	8	8	1	1	1
2015.01.07	A878927004	A8789270	2012	1	1	2	A878	1	10	#NULL!	4	4	1	#NULL!	2664.4	2373.34	#NULL!	#NULL!	#NULL!	#NULL!	#NULL!	#NULL!	#NULL!	#NULL!	501	1	2	8	2	8	2	8	8	8	8	8	8	8	8	8	8	2	8	8	8	8	1	1	1
2015.01.07	A878928801	A8789288	2012	1	1	2	A878	1	50	#NULL!	3	4	4	2	2664.4	5107.1	10534.7	#NULL!	5405.61	6072.87	#NULL!	13866.2	#NULL!	#NULL!	501	1	2	8	2	8	2	8	2	8	8	2	8	1	8	2	8	2	8	8	8	8	1	1	1
2015.01.07	A878928802	A8789288	2012	1	1	2	A878	2	49	#NULL!	3	4	3	7	2664.4	3478.37	#NULL!	#NULL!	3664.33	4069.02	#NULL!	#NULL!	#NULL!	#NULL!	501	1	2	8	2	8	2	8	1	3	2	2	8	1	8	1	1	2	8	8	8	8	1	1	1
2015.01.07	A878928803	A8789288	2012	1	1	2	A878	2	22	#NULL!	3	4	4	7	2664.4	2867.2	#NULL!	#NULL!	3103.96	4996.45	#NULL!	#NULL!	#NULL!	#NULL!	501	1	2	8	2	8	2	8	8	8	8	2	8	1	8	2	8	1	1	2	2	1	1	1	1
2015.01.07	A878930001	A8789300	2012	1	1	2	A878	2	66	#NULL!	4	3	1	7	2664.4	1290	1680.65	#NULL!	1490.98	1537.24	#NULL!	1822.64	#NULL!	#NULL!	501	1	2	8	2	8	2	8	1	3	2	2	8	2	3	1	2	2	8	8	8	8	1	1	1
2015.01.07	A878930002	A8789300	2012	1	1	2	A878	1	37	#NULL!	3	3	4	1	2664.4	3522.5	#NULL!	11895	3850.87	6437.95	#NULL!	#NULL!	15957.6	#NULL!	501	1	2	8	2	8	2	8	8	8	8	2	8	1	8	2	8	2	8	8	8	8	1	1	1
2015.01.07	A879899701	A8798997	2012	1	1	1	A879	2	43	#NULL!	3	4	#NULL!	#NULL!	14641.2	11858.5	17090	22536.1	11660.7	17333.1	25641.9	15570.6	22715.6	22877.1	512	1	2	8	2	8	2	8	2	8	8	2	8	1	8	2	8	2	8	8	8	8	1	1	1
2015.01.07	A879905702	A8799057	2012	1	1	1	A879	2	69	#NULL!	1	1	1	7	14641.2	18407	14932.2	44220	9774.25	20338.6	21556.5	14169.5	49465.3	20318.4	512	1	2	8	2	8	2	8	2	8	8	2	8	1	8	2	8	2	8	8	8	8	1	1	1
2015.01.07	A879906301	A8799063	2012	1	1	1	A879	1	43	#NULL!	1	1	3	7	14641.2	18340.6	#NULL!	#NULL!	19884.2	24074.7	#NULL!	#NULL!	#NULL!	#NULL!	512	1	2	8	2	8	2	8	2	8	8	2	8	1	8	2	8	2	8	8	8	8	1	1	1
2015.01.07	A879906302	A8799063	2012	1	1	1	A879	2	44	#NULL!	1	1	#NULL!	#NULL!	14641.2	11858.5	26114.7	#NULL!	11660.7	17333.1	#NULL!	27579.8	#NULL!	#NULL!	512	1	2	8	2	8	2	8	2	8	8	2	8	1	8	2	8	2	8	8	8	8	1	1	1
2015.01.07	A879906303	A8799063	2012	1	1	1	A879	1	8	#NULL!	1	1	1	#NULL!	14641.2	6271.39	#NULL!	#NULL!	6490.08	13172.4	#NULL!	#NULL!	#NULL!	#NULL!	512	1	2	8	2	8	2	8	8	8	8	8	8	8	8	8	8	1	1	1	1	2	1	1	1
2015.01.07	A879909001	A8799090	2012	1	1	1	A879	1	68	#NULL!	3	2	2	7	14641.2	9504.6	19879.5	#NULL!	10061.4	9772.37	#NULL!	19063.8	#NULL!	#NULL!	512	1	2	8	2	8	2	8	2	8	8	2	8	1	8	1	1	2	8	8	8	8	1	1	1
2015.01.07	A879909002	A8799090	2012	1	1	1	A879	2	65	#NULL!	3	2	2	7	14641.2	7088.7	#NULL!	#NULL!	7330.69	7558.15	#NULL!	#NULL!	#NULL!	#NULL!	512	1	2	8	2	8	2	8	2	8	8	2	8	1	8	2	8	2	8	8	8	8	1	1	1
2015.01.07	A879910201	A8799102	2012	1	1	1	A879	1	68	#NULL!	1	1	1	7	14641.2	9504.6	9939.77	10709.7	10061.4	9772.37	13682.9	9531.92	12139.6	13428.5	512	1	2	8	2	8	2	8	1	2	2	2	8	1	8	2	8	2	8	8	8	8	1	1	1
2015.01.07	A879911401	A8799114	2012	1	1	1	A879	1	69	#NULL!	3	2	1	5	14641.2	9504.6	19879.5	#NULL!	10061.4	9772.37	#NULL!	19063.8	#NULL!	#NULL!	512	1	2	8	2	8	2	8	1	2	2	2	8	1	8	2	8	2	8	8	8	8	1	1	1
2015.01.07	A879911402	A8799114	2012	1	1	1	A879	2	64	#NULL!	3	2	1	6	14641.2	11074.6	#NULL!	#NULL!	10191.6	9024.4	#NULL!	#NULL!	#NULL!	#NULL!	512	1	2	8	1	2	2	8	2	8	8	2	8	1	8	2	8	2	8	8	8	8	1	1	1
2015.01.07	A879911403	A8799114	2012	1	1	1	A879	1	32	#NULL!	2	2	4	1	14641.2	19788.9	#NULL!	58277.4	21278.4	24829.6	#NULL!	#NULL!	72376.6	#NULL!	512	1	2	8	1	2	2	8	8	8	8	2	8	1	8	2	8	2	8	8	8	8	1	1	1
2015.01.07	A879912301	A8799123	2012	1	1	1	A879	1	28	#NULL!	2	3	2	1	14641.2	19885.5	#NULL!	35814.3	#NULL!	#NULL!	#NULL!	#NULL!	#NULL!	#NULL!	512	1	2	8	2	8	2	8	8	8	8	2	8	1	8	2	8	2	8	8	8	8	1	1	1
2015.01.07	A879912302	A8799123	2012	1	1	1	A879	2	28	#NULL!	2	3	4	1	14641.2	16971.2	#NULL!	#NULL!	19636.9	20971.9	#NULL!	#NULL!	#NULL!	#NULL!	512	1	2	8	1	2	2	8	8	8	8	2	8	1	8	2	8	2	8	8	8	8	1	1	1
2015.01.07	A879912303	A8799123	2012	1	1	1	A879	1	4	48	3	3	1	#NULL!	14641.2	6500.18	#NULL!	#NULL!	6681.15	18826.3	#NULL!	#NULL!	#NULL!	#NULL!	512	1	2	8	2	8	2	8	8	8	8	8	8	8	8	8	8	8	8	8	8	8	8	8	8
2015.01.07	A879923101	A8799231	2012	1	1	1	A879	1	36	#NULL!	4	4	3	3	14641.2	18000.4	#NULL!	#NULL!	19562.8	22443.8	#NULL!	#NULL!	#NULL!	#NULL!	512	1	2	8	2	8	2	8	8	8	8	2	8	1	8	2	8	2	8	8	8	8	1	1	1
2015.01.07	A879923102	A8799231	2012	1	1	1	A879	2	38	#NULL!	4	4	3	7	14641.2	17616	#NULL!	57624.5	18705	20620	#NULL!	#NULL!	67008.8	#NULL!	512	1	2	8	2	8	2	8	8	8	8	2	8	1	8	2	8	1	1	1	1	2	1	1	1
2015.01.07	A879923103	A8799231	2012	1	1	1	A879	1	5	67	4	4	1	#NULL!	14641.2	6271.39	#NULL!	#NULL!	6490.08	16465.5	#NULL!	#NULL!	#NULL!	#NULL!	512	1	2	8	2	8	2	8	8	8	8	8	8	8	8	8	8	8	8	8	8	8	8	8	8
2015.01.07	A879923104	A8799231	2012	1	1	1	A879	1	1	23	4	4	1	#NULL!	14641.2	6500.18	#NULL!	#NULL!	6681.15	15688.6	#NULL!	#NULL!	#NULL!	#NULL!	512	1	8	8	8	8	8	8	8	8	8	8	8	8	8	8	8	8	8	8	8	8	8	8	8
2015.01.07	A879925801	A8799258	2012	1	1	1	A879	2	58	#NULL!	1	1	1	7	14641.2	17774.3	10911	37118.5	19394.9	20175.6	19777.5	10933.8	40481.1	19191	512	1	2	8	2	8	2	8	2	8	8	2	8	1	8	2	8	2	8	8	8	8	1	1	1
2015.01.07	A879927301	A8799273	2012	1	1	1	A879	1	44	#NULL!	2	3	3	1	14641.2	18340.6	28818.3	39181	19884.2	24074.7	62248.2	31802.5	61724	87081.6	512	1	2	8	1	2	2	8	2	8	8	2	8	1	8	2	8	2	8	8	8	8	1	1	1
2015.01.07	A879927302	A8799273	2012	1	1	1	A879	2	37	#NULL!	2	3	4	7	14641.2	12581.8	#NULL!	33570.3	12470	17571.6	#NULL!	#NULL!	33520.8	#NULL!	512	1	2	8	2	8	2	8	8	8	8	2	8	1	8	2	8	2	8	8	8	8	1	1	1
2015.01.07	A879927303	A8799273	2012	1	1	1	A879	1	8	#NULL!	2	3	1	#NULL!	14641.2	6271.39	#NULL!	#NULL!	6490.08	13172.4	#NULL!	#NULL!	#NULL!	#NULL!	512	1	2	8	2	8	2	8	8	8	8	8	8	8	8	8	8	1	1	1	1	2	1	1	1
2015.01.07	A879927304	A8799273	2012	1	1	1	A879	2	75	#NULL!	4	3	#NULL!	#NULL!	14641.2	10195.6	#NULL!	#NULL!	8632.28	8892.77	#NULL!	#NULL!	#NULL!	#NULL!	512	1	2	8	2	8	2	8	2	8	8	2	8	1	8	2	8	2	8	8	8	8	1	1	1
2015.01.07	A879931501	A8799315	2012	1	1	1	A879	2	75	#NULL!	2	1	1	7	14641.2	10195.6	11288.1	#NULL!	8632.28	8892.77	#NULL!	10636.3	#NULL!	#NULL!	512	1	2	8	2	8	2	8	1	2	2	2	8	2	3	1	1	2	8	8	8	8	1	1	1
2015.01.07	A879931502	A8799315	2012	1	1	1	A879	1	79	#NULL!	2	1	4	7	14641.2	7677.11	9910.99	#NULL!	7111.84	8232.23	#NULL!	9843.95	#NULL!	#NULL!	512	1	2	8	2	8	2	8	2	8	8	2	8	1	8	2	8	2	8	8	8	8	1	1	1
2015.01.07	A879931801	A8799318	2012	1	1	1	A879	1	44	#NULL!	1	2	4	3	14641.2	18340.6	28818.3	52241.4	19884.2	24074.7	31124.1	31802.5	74284.9	43540.8	512	1	2	8	2	8	2	8	2	8	8	2	8	1	8	2	8	2	8	8	8	8	1	1	1
2015.01.07	A879931802	A8799318	2012	1	1	1	A879	2	39	#NULL!	1	2	4	3	14641.2	12581.8	#NULL!	#NULL!	12470	17571.6	#NULL!	#NULL!	#NULL!	#NULL!	512	1	2	8	2	8	2	8	8	8	8	2	8	1	8	2	8	2	8	8	8	8	1	1	1
2015.01.07	A879931803	A8799318	2012	1	1	1	A879	2	5	66	1	2	1	#NULL!	14641.2	9361.04	#NULL!	#NULL!	8948.25	16895.3	#NULL!	#NULL!	#NULL!	#NULL!	512	1	2	8	2	8	2	8	8	8	8	8	8	8	8	8	8	8	8	8	8	8	8	8	8
2015.01.07	A879931804	A8799318	2012	1	1	1	A879	2	4	48	1	2	1	#NULL!	14641.2	10010	#NULL!	#NULL!	9107.68	16802.3	#NULL!	#NULL!	#NULL!	#NULL!	512	1	2	8	2	8	1	2	8	8	8	8	8	8	8	8	8	8	8	8	8	8	8	8	8
2015.01.07	A879931805	A8799318	2012	1	1	1	A879	1	1	20	1	2	1	#NULL!	14641.2	6500.18	#NULL!	#NULL!	6681.15	12550.9	#NULL!	#NULL!	#NULL!	#NULL!	512	1	8	8	8	8	8	8	8	8	8	8	8	8	8	8	8	8	8	8	8	8	8	8	8
2015.01.07	A880897002	A8808970	2012	1	1	1	A880	2	44	#NULL!	3	3	3	3	11815.1	9569.52	13827.1	21217.1	10133.7	15063.3	24895.6	14397.5	57029.7	22211.3	512	1	2	8	2	8	2	8	1	2	2	2	8	1	8	1	1	2	8	8	8	8	1	1	1
2015.01.07	A880897003	A8808970	2012	1	1	1	A880	2	16	#NULL!	3	3	2	7	11815.1	10131.9	#NULL!	#NULL!	16666.8	21729.8	#NULL!	#NULL!	#NULL!	#NULL!	512	1	2	8	2	8	2	8	8	8	8	8	8	1	8	2	8	2	8	8	8	8	1	1	1
2015.01.07	A880897004	A8808970	2012	1	1	1	A880	2	12	#NULL!	3	3	1	#NULL!	11815.1	6718.01	#NULL!	#NULL!	8794.27	13068.7	#NULL!	#NULL!	#NULL!	#NULL!	512	1	2	8	2	8	2	8	8	8	8	8	8	1	8	2	8	2	8	8	8	8	1	1	1
2015.01.07	A880898501	A8808985	2012	1	1	1	A880	1	76	#NULL!	4	4	4	7	11815.1	6195.24	#NULL!	#NULL!	6180.55	7154.23	#NULL!	#NULL!	#NULL!	#NULL!	512	1	2	8	2	8	2	8	1	1	1	2	8	1	8	2	8	1	2	1	1	2	1	1	1
2015.01.07	A880898502	A8808985	2012	1	1	1	A880	2	73	#NULL!	4	4	3	7	11815.1	8500.79	18265.9	#NULL!	8316.77	7728.28	#NULL!	19670	#NULL!	#NULL!	512	1	2	8	2	8	2	8	1	2	2	1	1	1	8	1	1	2	8	8	8	8	1	1	1
2015.01.07	A880899101	A8808991	2012	1	1	1	A880	2	28	#NULL!	1	2	4	1	11815.1	13695.3	#NULL!	16086.5	15229.5	20445.7	#NULL!	#NULL!	17468.8	#NULL!	512	1	2	8	2	8	2	8	8	8	8	2	8	1	8	1	1	1	2	1	1	2	1	1	1
2015.01.07	A880904501	A8809045	2012	1	1	1	A880	1	32	#NULL!	4	4	3	6	11815.1	19788.9	#NULL!	#NULL!	21278.4	24829.6	#NULL!	#NULL!	#NULL!	#NULL!	512	1	2	8	2	8	2	8	8	8	8	1	1	1	8	1	1	1	2	1	2	1	1	1	1
2015.01.07	A880904502	A8809045	2012	1	1	1	A880	2	32	#NULL!	4	4	4	2	11815.1	14576.6	#NULL!	43626.3	14476.2	17742.2	#NULL!	#NULL!	44671.2	#NULL!	512	1	2	8	1	2	2	8	8	8	8	2	8	1	8	2	8	1	2	1	1	2	1	1	1
2015.01.07	A880906901	A8809069	2012	1	1	1	A880	2	44	#NULL!	1	2	3	7	11815.1	9569.52	13827.1	#NULL!	#NULL!	#NULL!	#NULL!	#NULL!	#NULL!	#NULL!	512	1	2	8	2	8	2	8	2	8	8	2	8	1	8	2	8	2	8	8	8	8	1	1	1
2015.01.07	A880906903	A8809069	2012	1	1	1	A880	2	16	#NULL!	2	2	2	7	11815.1	10131.9	#NULL!	#NULL!	#NULL!	#NULL!	#NULL!	#NULL!	#NULL!	#NULL!	512	1	2	8	2	8	2	8	8	8	8	8	8	1	8	1	1	1	2	2	2	2	1	1	1
2015.01.07	A880907801	A8809078	2012	1	1	1	A880	1	24	#NULL!	2	3	3	2	11815.1	21593.9	#NULL!	41482.3	30402.6	29528.7	#NULL!	#NULL!	52903.9	#NULL!	512	1	2	8	2	8	2	8	8	8	8	2	8	1	8	2	8	1	1	2	1	2	1	1	1
2015.01.07	A880907802	A8809078	2012	1	1	1	A880	2	25	#NULL!	2	3	4	2	11815.1	13695.3	#NULL!	#NULL!	#NULL!	#NULL!	#NULL!	#NULL!	#NULL!	#NULL!	512	1	2	8	1	2	2	8	8	8	8	2	8	1	8	2	8	1	2	1	2	1	1	1	1
2015.01.07	A880909301	A8809093	2012	1	1	1	A880	2	24	#NULL!	2	3	3	7	11815.1	12714.4	#NULL!	#NULL!	13262.8	21079.1	#NULL!	#NULL!	#NULL!	#NULL!	512	1	1	2	2	8	2	8	8	8	8	2	8	1	8	1	1	1	2	1	1	2	1	1	1
2015.01.07	A880910801	A8809108	2012	1	1	1	A880	2	50	#NULL!	2	3	2	6	11815.1	9723.64	#NULL!	17774.4	19307.3	20701.8	#NULL!	#NULL!	37074.9	#NULL!	512	1	2	8	2	8	2	8	2	8	8	2	8	2	3	2	8	2	8	8	8	8	1	1	1
2015.01.07	A880910802	A8809108	2012	1	1	1	A880	1	26	#NULL!	3	3	3	#NULL!	11815.1	19885.5	#NULL!	16859.1	#NULL!	#NULL!	#NULL!	#NULL!	#NULL!	#NULL!	512	1	2	8	2	8	2	8	8	8	8	2	8	1	8	2	8	2	8	8	8	8	1	1	1
2015.01.07	A880913801	A8809138	2012	1	1	1	A880	1	69	#NULL!	4	3	4	4	11815.1	11505	8042.05	30248.8	13115.8	12739	26569.3	8813.79	30477.5	26075.2	512	1	2	8	2	8	2	8	2	8	8	2	8	1	8	1	1	1	1	2	2	2	1	1	1
2015.01.07	A880913802	A8809138	2012	1	1	1	A880	2	65	#NULL!	4	3	3	7	11815.1	8580.62	6040.64	#NULL!	9556.11	9852.63	#NULL!	6550.97	#NULL!	#NULL!	512	1	2	8	2	8	2	8	1	2	2	1	2	1	8	2	8	2	8	8	8	8	1	1	1
2015.01.07	A880917401	A8809174	2012	1	1	1	A880	1	70	#NULL!	4	4	3	7	11815.1	5981.81	#NULL!	55608.8	6316.63	7154.23	#NULL!	#NULL!	58656.9	#NULL!	512	1	2	8	2	8	2	8	2	8	8	2	8	1	8	2	8	2	8	8	8	8	1	1	1
2015.01.07	A880917402	A8809174	2012	1	1	1	A880	2	64	#NULL!	4	4	3	7	11815.1	8936.96	14370.9	13830.9	8857.02	7842.67	30334.8	15969	14193.3	29474.5	512	1	2	8	2	8	2	8	2	8	8	2	8	1	8	2	8	1	2	2	2	2	2	1	1
2015.01.07	A880919201	A8809192	2012	1	1	1	A880	1	39	#NULL!	3	3	4	1	11815.1	15620.3	#NULL!	21592.5	16454.2	22443.8	#NULL!	#NULL!	23173.8	#NULL!	512	1	2	8	2	8	1	2	8	8	8	2	8	1	8	2	8	2	8	8	8	8	1	1	1
2015.01.07	A880924001	A8809240	2012	1	1	1	A880	2	44	#NULL!	2	2	3	6	11815.1	9569.52	13827.1	#NULL!	10133.7	15063.3	#NULL!	14397.5	#NULL!	#NULL!	512	1	2	8	2	8	2	8	2	8	8	2	8	1	8	2	8	2	8	8	8	8	1	1	1
2015.01.07	A880926101	A8809261	2012	1	1	1	A880	1	51	#NULL!	2	3	3	6	11815.1	19765.6	18932	#NULL!	20891.9	21796.1	#NULL!	24919.1	#NULL!	#NULL!	512	1	2	8	2	8	2	8	2	8	8	2	8	1	8	2	8	2	8	8	8	8	1	1	1
2015.01.07	A880927601	A8809276	2012	1	1	1	A880	1	56	#NULL!	1	2	2	5	11815.1	16261.3	26050.8	22040.7	16920	16327.3	29870.6	28531.2	21992.7	28230.6	512	1	2	8	2	8	2	8	2	8	8	2	8	1	8	2	8	2	8	8	8	8	1	1	1
2015.01.07	A880927602	A8809276	2012	1	1	1	A880	2	52	#NULL!	1	2	3	5	11815.1	9723.64	#NULL!	#NULL!	10130.9	12389.2	#NULL!	#NULL!	#NULL!	#NULL!	512	1	2	8	2	8	2	8	1	2	2	2	8	1	8	1	1	2	8	8	8	8	1	1	1
2015.01.07	A880927603	A8809276	2012	1	1	1	A880	2	24	#NULL!	1	2	3	2	11815.1	12714.4	#NULL!	26408.8	13262.8	21079.1	#NULL!	#NULL!	26694.9	#NULL!	512	1	2	8	1	2	2	8	8	8	8	2	8	1	8	1	1	1	1	1	1	2	1	1	1
2015.01.07	A881908101	A8819081	2012	1	1	1	A881	1	65	#NULL!	2	2	4	7	7361.03	4778.54	5688.92	6865.15	5374.64	5220.24	13156.5	6364.74	7685.63	21519.8	512	1	2	8	2	8	2	8	1	2	2	2	8	1	8	2	8	2	8	8	8	8	1	1	1
2015.01.07	A881908102	A8819081	2012	1	1	1	A881	2	60	#NULL!	2	2	2	3	7361.03	5567.88	5082.96	9417.03	5444.18	4820.68	15021.1	5765.86	10737.5	24325.2	512	1	2	8	2	8	2	8	2	8	8	2	8	1	8	2	8	2	8	8	8	8	1	1	1
2015.01.07	A881911401	A8819114	2012	1	1	1	A881	1	50	#NULL!	4	4	3	3	7361.03	14109.5	13392.4	#NULL!	14197.4	15949.9	#NULL!	17995	#NULL!	#NULL!	512	1	2	8	2	8	2	8	2	8	8	2	8	1	8	2	8	2	8	8	8	8	1	1	1
2015.01.07	A881911402	A8819114	2012	1	1	1	A881	2	51	#NULL!	4	4	3	3	7361.03	6058	7993.79	#NULL!	6227.18	7615.29	#NULL!	9440.95	#NULL!	#NULL!	512	1	1	2	1	2	1	2	1	2	2	2	8	1	8	1	2	1	2	2	2	1	2	1	1
2015.01.07	A881911403	A8819114	2012	1	1	1	A881	1	14	#NULL!	4	4	1	#NULL!	7361.03	7040.05	#NULL!	23371.5	5971.34	9018.32	#NULL!	#NULL!	28493	#NULL!	512	1	2	8	1	2	2	8	8	8	8	8	8	1	8	2	8	2	8	8	8	8	1	1	1
2015.01.07	A881912301	A8819123	2012	1	1	1	A881	1	43	#NULL!	4	4	3	1	7361.03	12089.7	18763.1	33487.8	14541.7	24074.7	59853.5	30338.6	52103.8	102712	512	1	2	8	2	8	2	8	2	8	8	2	8	1	8	2	8	2	8	8	8	8	1	1	1
2015.01.07	A881912302	A8819123	2012	1	1	1	A881	2	40	#NULL!	4	4	3	2	7361.03	5961.98	9781.25	#NULL!	6228.93	9259.04	#NULL!	10396.9	#NULL!	#NULL!	512	1	2	8	2	8	2	8	2	8	8	2	8	1	8	2	8	2	8	8	8	8	1	1	1
2015.01.07	A881912303	A8819123	2012	1	1	1	A881	2	14	#NULL!	4	4	1	#NULL!	7361.03	7623.49	#NULL!	42810.8	5405.61	8032.99	#NULL!	#NULL!	16903.8	#NULL!	512	1	2	8	2	8	2	8	8	8	8	8	8	1	8	1	1	2	8	8	8	8	1	1	1
2015.01.07	A881912304	A8819123	2012	1	1	1	A881	1	12	#NULL!	4	4	1	#NULL!	7361.03	7040.05	#NULL!	#NULL!	5971.34	9018.32	#NULL!	#NULL!	#NULL!	#NULL!	512	1	2	8	2	8	2	8	8	8	8	8	8	1	8	2	8	2	8	8	8	8	1	1	1
2015.01.07	A881914101	A8819141	2012	1	1	1	A881	2	75	#NULL!	1	1	1	7	7361.03	5125.94	6460.61	#NULL!	4611.22	4750.37	#NULL!	7102.18	#NULL!	#NULL!	512	1	2	8	2	8	2	8	1	2	2	2	8	1	8	1	1	2	8	8	8	8	1	1	1
2015.01.07	A881914102	A8819141	2012	1	1	1	A881	2	18	#NULL!	1	1	2	7	7361.03	11497.5	#NULL!	#NULL!	10244.6	15903.4	#NULL!	#NULL!	#NULL!	#NULL!	512	1	2	8	2	8	2	8	8	8	8	8	8	1	8	1	1	2	8	8	8	8	1	1	1
2015.01.07	A881915001	A8819150	2012	1	1	1	A881	1	58	#NULL!	4	4	4	1	7361.03	10131.1	9222.33	#NULL!	10400.3	10036	#NULL!	11119.4	#NULL!	#NULL!	512	1	2	8	2	8	2	8	2	8	8	2	8	1	8	2	8	2	8	8	8	8	1	1	1
2015.01.07	A881915002	A8819150	2012	1	1	1	A881	2	53	#NULL!	4	4	3	3	7361.03	6058	7993.79	#NULL!	6227.18	7615.29	#NULL!	9440.95	#NULL!	#NULL!	512	1	2	8	2	8	2	8	2	8	8	2	8	2	3	2	8	2	8	8	8	8	1	1	1
2015.01.07	A881915003	A8819150	2012	1	1	1	A881	2	30	#NULL!	4	4	4	1	7361.03	9081.49	#NULL!	44555.8	8898.13	10905.6	#NULL!	#NULL!	50692.1	#NULL!	512	1	2	8	2	8	2	8	8	8	8	2	8	1	8	2	8	2	8	8	8	8	1	1	1
2015.01.07	A881915602	A8819156	2012	1	1	1	A881	2	33	#NULL!	2	3	3	7	7361.03	17560.6	#NULL!	29703.9	8898.13	16358.5	#NULL!	#NULL!	33794.8	#NULL!	512	1	2	8	2	8	2	8	8	8	8	2	8	1	8	2	8	2	8	8	8	8	1	1	1
2015.01.07	A881915603	A8819156	2012	1	1	1	A881	1	1	14	3	3	1	#NULL!	7361.03	9259.43	#NULL!	#NULL!	9517.22	10056.7	#NULL!	#NULL!	#NULL!	#NULL!	512	1	8	8	8	8	8	8	8	8	8	8	8	8	8	8	8	8	8	8	8	8	8	8	8
2015.01.07	A881918902	A8819189	2012	1	1	1	A881	2	68	#NULL!	2	2	1	3	7361.03	10691.8	8546.26	#NULL!	11747.8	12112.3	#NULL!	9461.36	#NULL!	#NULL!	512	1	2	8	2	8	2	8	2	8	8	2	8	1	8	1	1	2	8	8	8	8	1	1	1
2015.01.07	A881919201	A8819192	2012	1	1	1	A881	2	55	#NULL!	1	2	4	7	7361.03	8187.62	12489.6	#NULL!	9229.93	9567.82	#NULL!	14601.6	#NULL!	#NULL!	512	1	2	8	1	2	2	8	2	8	8	2	8	1	8	1	2	1	2	2	2	2	1	1	1
2015.01.07	A881919202	A8819192	2012	1	1	1	A881	1	55	#NULL!	1	2	4	6	7361.03	15196.6	#NULL!	30013.7	15600.4	15054	#NULL!	#NULL!	33275.9	#NULL!	512	1	2	8	2	8	2	8	1	1	2	2	8	1	8	2	8	2	8	8	8	8	1	1	1
2015.01.07	A881921301	A8819213	2012	1	1	1	A881	2	74	#NULL!	1	1	1	7	7361.03	5296.14	6460.61	#NULL!	5112.1	4750.37	#NULL!	7102.18	#NULL!	#NULL!	512	1	2	8	2	8	2	8	2	8	8	2	8	1	8	2	8	2	8	8	8	8	1	1	1
2015.01.07	A881921902	A8819219	2012	1	1	1	A881	2	48	#NULL!	2	3	#NULL!	#NULL!	7361.03	14414.7	11060.9	45320	#NULL!	#NULL!	51424.6	#NULL!	#NULL!	#NULL!	512	1	2	8	2	8	2	8	2	8	8	2	8	1	8	2	8	2	8	8	8	8	1	1	1
2015.01.07	A881922801	A8819228	2012	1	1	1	A881	1	72	#NULL!	4	3	1	7	7361.03	7453.55	8508.67	#NULL!	4529.78	10260.9	#NULL!	9859.64	#NULL!	#NULL!	512	1	2	8	2	8	2	8	2	8	8	2	8	1	8	2	8	2	8	8	8	8	1	1	1
2015.01.07	A881922802	A8819228	2012	1	1	1	A881	2	72	#NULL!	4	3	1	7	7361.03	10592.3	9690.91	#NULL!	5964.12	11084.2	#NULL!	10653.3	#NULL!	#NULL!	512	1	2	8	2	8	2	8	2	8	8	2	8	1	8	2	8	2	8	8	8	8	1	1	1
2015.01.07	A881922807	A8819228	2012	1	1	1	A881	2	12	#NULL!	2	3	1	#NULL!	7361.03	17900.2	#NULL!	#NULL!	6306.54	18743.6	#NULL!	#NULL!	#NULL!	#NULL!	512	1	2	8	2	8	2	8	8	8	8	8	8	1	8	1	1	2	8	8	8	8	1	1	1
2015.01.07	A881926701	A8819267	2012	1	1	1	A881	1	52	#NULL!	2	3	3	5	7361.03	19765.6	13392.4	#NULL!	#NULL!	#NULL!	#NULL!	#NULL!	#NULL!	#NULL!	512	1	2	8	2	8	1	2	2	8	8	2	8	1	8	1	2	2	8	8	8	8	1	1	1
2015.01.07	A881926702	A8819267	2012	1	1	1	A881	2	51	#NULL!	2	3	3	3	7361.03	12116	7993.79	48408.2	19307.3	20701.8	40461.5	18881.9	56096	69134.7	512	1	2	8	2	8	2	8	2	8	8	2	8	1	8	1	1	2	8	8	8	8	1	1	1
2015.01.07	A881929101	A8819291	2012	1	1	1	A881	1	55	#NULL!	2	3	1	5	7361.03	13508.1	9222.33	#NULL!	13867	13381.3	#NULL!	11119.4	#NULL!	#NULL!	512	1	2	8	1	1	2	8	1	3	2	2	8	1	8	2	8	1	2	2	2	1	1	1	1
2015.01.07	A881929102	A8819291	2012	1	1	1	A881	2	51	#NULL!	2	3	1	5	7361.03	8077.33	7993.79	#NULL!	8302.91	10153.7	#NULL!	9440.95	#NULL!	#NULL!	512	1	2	8	2	8	2	8	2	8	8	2	8	1	8	2	8	2	8	8	8	8	1	1	1
2015.01.07	A881929104	A8819291	2012	1	1	1	A881	2	22	#NULL!	2	3	4	2	7361.03	10561.7	#NULL!	47949.3	10869.7	17497	#NULL!	#NULL!	53854.1	#NULL!	512	1	2	8	2	8	2	8	8	8	8	2	8	1	8	2	8	2	8	8	8	8	1	1	1
2015.01.07	A881929701	A8819297	2012	1	1	1	A881	1	62	#NULL!	4	4	#NULL!	#NULL!	7361.03	15132.7	12647.3	30720	#NULL!	#NULL!	24894.6	#NULL!	#NULL!	#NULL!	512	1	1	2	2	8	2	8	2	8	8	2	8	1	8	2	8	2	8	8	8	8	1	1	1
2015.01.07	A881929702	A8819297	2012	1	1	1	A881	2	56	#NULL!	4	4	2	6	7361.03	10916.8	#NULL!	#NULL!	19394.9	20175.6	#NULL!	#NULL!	#NULL!	#NULL!	512	1	2	8	2	8	2	8	1	3	2	2	8	1	8	2	8	2	8	8	8	8	1	1	1
2015.01.07	A881930903	A8819309	2012	1	1	1	A881	2	82	#NULL!	1	1	#NULL!	#NULL!	7361.03	15377.8	#NULL!	#NULL!	13833.7	14251.1	#NULL!	#NULL!	#NULL!	#NULL!	512	1	2	8	2	8	2	8	2	8	8	2	8	2	3	1	1	2	8	8	8	8	1	1	1
2015.01.07	A881931202	A8819312	2012	1	1	1	A881	2	50	#NULL!	3	3	2	5	7361.03	8077.33	#NULL!	#NULL!	8302.91	10153.7	#NULL!	#NULL!	#NULL!	#NULL!	512	1	2	8	2	8	2	8	2	8	8	2	8	1	8	2	8	2	8	8	8	8	1	1	1
2015.01.07	A881931203	A8819312	2012	1	1	1	A881	2	26	#NULL!	3	3	3	3	7361.03	11376.6	#NULL!	21905.6	12481.6	16756.6	#NULL!	#NULL!	26431.1	#NULL!	512	1	1	2	2	8	2	8	8	8	8	2	8	1	8	1	1	1	2	1	1	2	1	1	1
2015.01.07	A881931204	A8819312	2012	1	1	1	A881	1	23	#NULL!	3	3	3	7	7361.03	21593.9	#NULL!	28244	30402.6	29528.7	#NULL!	#NULL!	40023	#NULL!	512	1	2	8	2	8	2	8	8	8	8	2	8	1	8	2	8	2	8	8	8	8	1	1	1
2015.01.07	A882906901	A8829069	2012	1	1	1	A882	2	22	#NULL!	1	1	4	7	7229.54	15559.6	#NULL!	#NULL!	7954.33	21079.1	#NULL!	#NULL!	#NULL!	#NULL!	512	1	2	8	1	2	2	8	8	8	8	2	8	1	8	2	8	2	8	8	8	8	1	1	1
2015.01.07	A882908101	A8829081	2012	1	1	1	A882	1	22	#NULL!	1	1	3	7	7229.54	21593.9	#NULL!	14092.3	30402.6	29528.7	#NULL!	#NULL!	17972.4	#NULL!	512	1	2	8	2	8	2	8	8	8	8	2	8	1	8	2	8	2	8	8	8	8	1	1	1
2015.01.07	A882908401	A8829084	2012	1	1	1	A882	1	25	#NULL!	1	1	3	1	7229.54	12715.2	#NULL!	11454.7	17024.2	26219.3	#NULL!	#NULL!	15453	#NULL!	512	1	1	2	1	1	2	8	8	8	8	2	8	1	8	2	8	2	8	8	8	8	1	1	1
2015.01.07	A882909601	A8829096	2012	1	1	1	A882	2	56	#NULL!	3	3	4	1	7229.54	5360.91	6235.71	11871.8	6003.87	6223.66	12207.2	7029.79	11508.7	11845.1	512	1	2	8	2	8	2	8	2	8	8	2	8	1	8	1	2	2	8	8	8	8	1	1	1
2015.01.07	A882912601	A8829126	2012	1	1	1	A882	1	80	#NULL!	2	1	3	7	7229.54	3790.8	5664.17	#NULL!	3706.78	4290.74	#NULL!	6329.09	#NULL!	#NULL!	512	1	2	8	2	8	2	8	2	8	8	2	8	1	8	2	8	2	8	8	8	8	1	1	1
2015.01.07	A882913801	A8829138	2012	1	1	1	A882	2	29	#NULL!	4	4	4	1	7229.54	8380.03	#NULL!	10929.7	9133.88	12262.3	#NULL!	#NULL!	11868.9	#NULL!	512	1	2	8	2	8	2	8	8	8	8	2	8	1	8	2	8	1	1	2	1	2	1	1	1
2015.01.07	A882915001	A8829150	2012	1	1	1	A882	2	24	#NULL!	2	2	4	1	7229.54	7779.8	#NULL!	11962.1	7954.33	12804.1	#NULL!	#NULL!	12091.7	#NULL!	512	1	2	8	2	8	1	2	8	8	8	2	8	1	8	2	8	1	2	2	1	2	1	1	1
2015.01.07	A882919501	A8829195	2012	1	1	1	A882	2	55	#NULL!	3	3	3	3	7229.54	5360.91	#NULL!	#NULL!	6003.87	6223.66	#NULL!	#NULL!	#NULL!	#NULL!	512	1	2	8	2	8	2	8	2	8	8	2	8	1	8	2	8	2	8	8	8	8	1	1	1
2015.01.07	A882919502	A8829195	2012	1	1	1	A882	2	31	#NULL!	3	3	4	1	7229.54	8919.26	#NULL!	29641.3	8682.06	10640.8	#NULL!	#NULL!	30351.2	#NULL!	512	1	2	8	1	1	2	8	8	8	8	2	8	1	8	2	8	1	2	1	1	2	1	1	1
2015.01.07	A882925502	A8829255	2012	1	1	1	A882	2	27	#NULL!	2	3	4	1	7229.54	16760.1	#NULL!	#NULL!	9133.88	20971.9	#NULL!	#NULL!	#NULL!	#NULL!	512	1	2	8	1	2	2	8	8	8	8	2	8	1	8	1	1	1	1	1	1	1	1	1	1
2015.01.07	A882927001	A8829270	2012	1	1	1	A882	1	30	#NULL!	4	4	4	1	7229.54	17997.2	#NULL!	#NULL!	19022	24829.6	#NULL!	#NULL!	#NULL!	#NULL!	512	1	2	8	2	8	2	8	8	8	8	2	8	1	8	2	8	2	8	8	8	8	1	1	1
2015.01.07	A882927902	A8829279	2012	1	1	1	A882	2	38	#NULL!	3	3	3	7	7229.54	12425.3	#NULL!	#NULL!	6499.5	13737.8	#NULL!	#NULL!	#NULL!	#NULL!	512	1	2	8	2	8	2	8	8	8	8	2	8	1	8	2	8	2	8	8	8	8	1	1	1
2015.01.07	A882927903	A8829279	2012	1	1	1	A882	1	3	44	3	3	1	#NULL!	7229.54	5349.43	#NULL!	#NULL!	10996.7	9812.48	#NULL!	#NULL!	#NULL!	#NULL!	512	1	8	8	8	8	8	8	8	8	8	8	8	8	8	8	8	8	8	8	8	8	8	8	8
2015.01.07	A882928801	A8829288	2012	1	1	1	A882	1	56	#NULL!	3	3	4	7	7229.54	14925.1	9208.88	#NULL!	10147.7	14688.4	#NULL!	10706.6	#NULL!	#NULL!	512	1	2	8	2	8	1	2	2	8	8	2	8	1	8	2	8	2	8	8	8	8	1	1	1
2015.01.07	A882928802	A8829288	2012	1	1	1	A882	2	54	#NULL!	3	3	3	3	7229.54	8924.68	7982.13	#NULL!	6075.97	11145.6	#NULL!	9090.5	#NULL!	#NULL!	512	1	2	8	2	8	2	8	2	8	8	2	8	1	8	1	1	2	8	8	8	8	1	1	1
2015.01.07	A882929701	A8829297	2012	1	1	1	A882	1	57	#NULL!	3	3	3	5	7229.54	9950.1	9208.88	39934	13530.3	13056.4	18989.6	10706.6	39847	17947	512	1	2	8	2	8	2	8	2	8	8	2	8	1	8	2	8	2	8	8	8	8	1	1	1
2015.01.07	A882929702	A8829297	2012	1	1	1	A882	2	55	#NULL!	3	3	3	2	7229.54	5360.91	6235.71	#NULL!	8005.16	8298.21	#NULL!	7029.79	#NULL!	#NULL!	512	1	2	8	2	8	2	8	2	8	8	2	8	1	8	2	8	2	8	8	8	8	1	1	1
2015.01.07	A882929703	A8829297	2012	1	1	1	A882	2	29	#NULL!	3	3	4	2	7229.54	8380.03	#NULL!	#NULL!	12178.5	16349.7	#NULL!	#NULL!	#NULL!	#NULL!	512	1	2	8	2	8	2	8	8	8	8	2	8	1	8	2	8	2	8	8	8	8	1	1	1
2015.01.07	A882929704	A8829297	2012	1	1	1	A882	1	26	#NULL!	3	3	#NULL!	#NULL!	7229.54	12715.2	#NULL!	#NULL!	#NULL!	#NULL!	#NULL!	#NULL!	#NULL!	#NULL!	512	1	2	8	2	8	2	8	8	8	8	2	8	1	8	2	8	1	1	2	2	2	1	1	1
2015.01.07	A882930301	A8829303	2012	1	1	1	A882	1	38	#NULL!	2	2	4	2	7229.54	9557.88	#NULL!	29341.5	9868.4	16498.1	#NULL!	#NULL!	31490.2	#NULL!	512	1	2	8	2	8	2	8	8	8	8	2	8	1	8	2	8	2	8	8	8	8	1	1	1
2015.01.07	A882930302	A8829303	2012	1	1	1	A882	2	37	#NULL!	2	2	4	7	7229.54	6212.65	#NULL!	#NULL!	6499.5	9158.51	#NULL!	#NULL!	#NULL!	#NULL!	512	1	2	8	2	8	2	8	8	8	8	2	8	1	8	2	8	2	8	8	8	8	1	1	1
2015.01.07	A882931201	A8829312	2012	1	1	1	A882	1	45	#NULL!	2	3	4	1	7229.54	10720.5	27061.3	29198.6	16466.7	21155.5	30500.3	30758.8	66377.3	37077.8	512	1	2	8	2	8	2	8	2	8	8	2	8	1	8	2	8	2	8	8	8	8	1	1	1
2015.01.07	A882931202	A8829312	2012	1	1	1	A882	2	43	#NULL!	3	3	4	1	7229.54	5855.48	#NULL!	#NULL!	6077.68	9034.21	#NULL!	#NULL!	#NULL!	#NULL!	512	1	2	8	2	8	2	8	2	8	8	2	8	1	8	2	8	2	8	8	8	8	1	1	1
2015.01.07	A882931203	A8829312	2012	1	1	1	A882	2	12	#NULL!	3	3	1	#NULL!	7229.54	5872.4	#NULL!	#NULL!	5274.35	7837.93	#NULL!	#NULL!	#NULL!	#NULL!	512	1	2	8	2	8	2	8	8	8	8	8	8	1	8	2	8	2	8	8	8	8	1	1	1
2015.01.07	A882931204	A8829312	2012	1	1	1	A882	2	10	#NULL!	3	3	1	#NULL!	7229.54	5872.4	#NULL!	#NULL!	4996.75	7837.93	#NULL!	#NULL!	#NULL!	#NULL!	512	1	2	8	2	8	2	8	8	8	8	8	8	8	8	8	8	2	8	8	8	8	1	1	1
2015.01.07	A882931502	A8829315	2012	1	1	1	A882	2	47	#NULL!	2	2	4	2	7229.54	17612	22089.6	30149.7	18780.7	20854.9	33010.5	23897.6	27489.9	32983.8	512	1	2	8	2	8	2	8	2	8	8	2	8	1	8	2	8	2	8	8	8	8	1	1	1
2015.01.07	A882931801	A8829318	2012	1	1	1	A882	1	53	#NULL!	3	4	3	1	7229.54	13857.5	13372.9	#NULL!	#NULL!	#NULL!	#NULL!	#NULL!	#NULL!	#NULL!	512	1	2	8	2	8	2	8	2	8	8	2	8	2	3	2	8	2	8	8	8	8	1	1	1
2015.01.07	A882931802	A8829318	2012	1	1	1	A882	2	49	#NULL!	3	4	3	6	7229.54	9438.15	11044.8	#NULL!	#NULL!	#NULL!	#NULL!	#NULL!	#NULL!	#NULL!	512	1	2	8	2	8	2	8	1	2	2	2	8	1	8	2	8	2	8	8	8	8	1	1	1
2015.01.07	A882931803	A8829318	2012	1	1	1	A882	1	14	#NULL!	3	4	1	#NULL!	7229.54	5422.97	#NULL!	#NULL!	#NULL!	#NULL!	#NULL!	#NULL!	#NULL!	#NULL!	512	1	1	2	2	8	2	8	8	8	8	8	8	1	8	2	8	2	8	8	8	8	1	1	1
2015.01.07	A882932101	A8829321	2012	1	1	1	A882	2	60	#NULL!	4	4	2	7	7229.54	5468.43	5075.55	18794.4	10624	11759.1	9642.35	5551.83	38573.6	9368.9	512	1	2	8	2	8	2	8	2	8	8	2	8	1	8	1	1	2	8	8	8	8	1	1	1
2015.01.07	A882932102	A8829321	2012	1	1	1	A882	1	33	#NULL!	4	4	3	5	7229.54	17997.2	#NULL!	#NULL!	#NULL!	#NULL!	#NULL!	#NULL!	#NULL!	#NULL!	512	1	2	8	2	8	2	8	8	8	8	2	8	1	8	2	8	2	8	8	8	8	1	1	1
2015.01.07	A882932103	A8829321	2012	1	1	1	A882	2	33	#NULL!	4	4	#NULL!	#NULL!	7229.54	8919.26	#NULL!	29641.3	#NULL!	#NULL!	#NULL!	#NULL!	#NULL!	#NULL!	512	1	2	8	1	2	2	8	8	8	8	2	8	1	8	2	8	1	2	1	1	2	1	1	1
2015.01.07	A882932104	A8829321	2012	1	1	1	A882	2	31	#NULL!	4	4	4	3	7229.54	8919.26	#NULL!	#NULL!	17364.1	20300.2	#NULL!	#NULL!	#NULL!	#NULL!	512	1	2	8	2	8	2	8	8	8	8	2	8	1	8	1	2	1	2	1	1	1	1	1	1
2015.01.07	A882932105	A8829321	2012	1	1	1	A882	1	2	30	4	4	1	#NULL!	7229.54	5349.43	#NULL!	#NULL!	#NULL!	#NULL!	#NULL!	#NULL!	#NULL!	#NULL!	512	1	8	8	8	8	8	8	8	8	8	8	8	8	8	8	8	8	8	8	8	8	8	8	8
2015.01.07	A882932402	A8829324	2012	1	1	1	A882	2	66	#NULL!	3	2	3	7	7229.54	3500.26	4266.9	#NULL!	3820.84	3939.4	#NULL!	4555.07	#NULL!	#NULL!	512	1	2	8	2	8	2	8	2	8	8	2	8	2	3	1	1	2	8	8	8	8	1	1	1
2015.01.07	A882932403	A8829324	2012	1	1	1	A882	2	38	#NULL!	1	2	4	1	7229.54	6212.65	#NULL!	#NULL!	6499.5	9158.51	#NULL!	#NULL!	#NULL!	#NULL!	512	1	2	8	1	1	2	8	8	8	8	2	8	1	8	2	8	1	2	1	1	2	1	1	1
2015.01.07	A882932404	A8829324	2012	1	1	1	A882	2	37	#NULL!	1	2	4	1	7229.54	6212.65	#NULL!	#NULL!	6499.5	9158.51	#NULL!	#NULL!	#NULL!	#NULL!	512	1	2	8	2	8	2	8	8	8	8	2	8	1	8	1	1	1	1	2	2	2	1	1	1
2015.01.07	A883915002	A8839150	2012	1	1	1	A883	2	32	#NULL!	2	3	3	7	4530.84	11179.6	#NULL!	#NULL!	12128.9	9910.2	#NULL!	#NULL!	#NULL!	#NULL!	512	1	2	8	2	8	2	8	8	8	8	2	8	1	8	2	8	2	8	8	8	8	1	1	1
2015.01.07	A883915003	A8839150	2012	1	1	1	A883	1	9	#NULL!	2	3	1	#NULL!	4530.84	3234.55	#NULL!	#NULL!	3347.34	6394.21	#NULL!	#NULL!	#NULL!	#NULL!	512	1	2	8	2	8	2	8	8	8	8	8	8	8	8	8	8	2	8	8	8	8	1	1	1
2015.01.07	A883915004	A8839150	2012	1	1	1	A883	2	7	#NULL!	2	3	1	#NULL!	4530.84	4828.08	#NULL!	#NULL!	4615.18	8201.37	#NULL!	#NULL!	#NULL!	#NULL!	512	1	2	8	2	8	2	8	8	8	8	8	8	8	8	8	8	2	8	8	8	8	1	1	1
2015.01.07	A883915302	A8839153	2012	1	1	1	A883	2	78	#NULL!	2	1	1	7	4530.84	6310.21	9096.83	#NULL!	6285.48	6475.15	#NULL!	9350.83	#NULL!	#NULL!	512	1	1	2	2	8	2	8	1	3	2	2	8	1	8	1	1	2	8	8	8	8	1	1	1
2015.01.07	A883915601	A8839156	2012	1	1	1	A883	1	69	#NULL!	2	2	1	7	4530.84	2941.27	4005.13	#NULL!	3663.04	3557.81	#NULL!	4189.95	#NULL!	#NULL!	512	1	2	8	2	8	2	8	2	8	8	2	8	1	8	1	1	2	8	8	8	8	1	1	1
2015.01.07	A883915602	A8839156	2012	1	1	1	A883	2	68	#NULL!	3	2	1	6	4530.84	2193.66	3008.38	#NULL!	2668.87	2751.68	#NULL!	3114.24	#NULL!	#NULL!	512	1	2	8	2	8	2	8	2	8	8	2	8	1	8	2	8	2	8	8	8	8	1	1	1
2015.01.07	A883918001	A8839180	2012	1	1	1	A883	2	81	#NULL!	2	1	1	7	4530.84	3155.11	#NULL!	#NULL!	3142.74	3237.58	#NULL!	#NULL!	#NULL!	#NULL!	512	1	2	8	2	8	2	8	1	1	2	2	8	3	3	1	3	1	1	2	2	1	1	1	1
2015.01.07	A883918002	A8839180	2012	1	1	1	A883	2	18	#NULL!	1	1	2	7	4530.84	8325.79	#NULL!	11749.9	6982.15	10838.8	#NULL!	#NULL!	19629	#NULL!	512	1	2	8	2	8	2	8	8	8	8	8	8	1	8	3	8	2	8	8	8	8	1	1	1
2015.01.07	A883918901	A8839189	2012	1	1	1	A883	1	49	#NULL!	3	4	4	1	4530.84	6718.68	10377.3	19262.2	17253	22165.8	35840.5	14527.6	40139.8	43569.5	512	1	2	8	1	2	2	8	2	8	8	2	8	1	8	2	8	1	1	2	1	2	1	1	1
2015.01.07	A883918902	A8839189	2012	1	1	1	A883	2	49	#NULL!	3	4	4	1	4530.84	5915.01	7787.14	#NULL!	9838.77	10925.4	#NULL!	8169.22	#NULL!	#NULL!	512	1	2	8	2	8	2	8	2	8	8	2	8	1	8	2	8	2	8	8	8	8	1	1	1
2015.01.07	A883919801	A8839198	2012	1	1	1	A883	2	64	#NULL!	2	2	1	7	4530.84	3427.13	#NULL!	#NULL!	3710.43	3285.5	#NULL!	#NULL!	#NULL!	#NULL!	512	1	2	8	2	8	1	2	2	8	8	2	8	2	3	1	1	2	8	8	8	8	1	1	1
2015.01.07	A883920101	A8839201	2012	1	1	1	A883	1	74	#NULL!	2	1	#NULL!	#NULL!	4530.84	2293.9	#NULL!	#NULL!	2646.2	2997.09	#NULL!	#NULL!	#NULL!	#NULL!	512	1	2	8	2	8	2	8	1	3	1	2	8	3	3	2	8	2	8	8	8	8	1	1	1
2015.01.07	A883920102	A8839201	2012	1	1	1	A883	2	61	#NULL!	1	1	1	6	4530.84	3427.13	7157.04	12398.6	3710.43	3285.5	22661.2	7591.42	15550.9	22018.5	512	1	2	8	2	8	2	8	2	8	8	2	8	1	8	2	8	2	8	8	8	8	1	1	1
2015.01.07	A883920401	A8839204	2012	1	1	1	A883	2	49	#NULL!	1	1	3	3	4530.84	5915.01	7787.14	#NULL!	13118.4	14567.2	#NULL!	8169.22	#NULL!	#NULL!	512	1	2	8	2	8	1	2	2	8	8	2	8	1	8	1	2	2	8	8	8	8	1	1	1
2015.01.07	A883920402	A8839204	2012	1	1	1	A883	1	22	#NULL!	1	1	3	1	4530.84	16075.6	#NULL!	27889.9	#NULL!	#NULL!	#NULL!	#NULL!	#NULL!	#NULL!	512	1	2	8	2	8	1	2	8	8	8	2	8	1	8	1	1	1	1	1	1	1	1	1	1
2015.01.07	A883920403	A8839204	2012	1	1	1	A883	1	20	#NULL!	1	1	3	7	4530.84	16075.6	#NULL!	#NULL!	#NULL!	#NULL!	#NULL!	#NULL!	#NULL!	#NULL!	512	1	2	8	2	8	2	8	8	8	8	2	8	1	8	2	8	2	8	8	8	8	1	1	1
2015.01.07	A883920404	A8839204	2012	1	1	1	A883	2	12	#NULL!	1	1	1	#NULL!	4530.84	5520.45	#NULL!	8611.37	7368.29	10949.6	#NULL!	#NULL!	24481.4	#NULL!	512	1	2	8	2	8	2	8	8	8	8	8	8	1	8	2	8	1	1	1	1	2	1	1	1
2015.01.07	A883920701	A8839207	2012	1	1	1	A883	2	63	#NULL!	4	4	1	6	4530.84	3427.13	3578.52	#NULL!	3710.43	3285.5	#NULL!	3795.71	#NULL!	#NULL!	512	1	2	8	2	8	2	8	2	8	8	2	8	1	8	2	8	2	8	8	8	8	1	1	1
2015.01.07	A883920702	A8839207	2012	1	1	1	A883	1	38	#NULL!	4	4	4	1	4530.84	5990.04	#NULL!	19356.5	6893.1	11524	#NULL!	#NULL!	25390.4	#NULL!	512	1	2	8	2	8	2	8	8	8	8	2	8	1	8	2	8	2	8	8	8	8	1	1	1
2015.01.07	A883922501	A8839225	2012	1	1	1	A883	1	74	#NULL!	1	1	#NULL!	#NULL!	4530.84	2293.9	#NULL!	#NULL!	2646.2	2997.09	#NULL!	#NULL!	#NULL!	#NULL!	512	1	1	2	2	8	2	8	2	8	8	1	2	3	3	1	1	2	8	8	8	8	1	1	1
2015.01.07	A883922502	A8839225	2012	1	1	1	A883	2	70	#NULL!	1	1	1	7	4530.84	3259.87	9096.83	#NULL!	3484.11	3237.58	#NULL!	9350.83	#NULL!	#NULL!	512	1	1	2	1	2	2	8	1	1	2	2	8	2	3	2	8	2	8	8	8	8	1	1	1
2015.01.07	A883923102	A8839231	2012	1	1	1	A883	2	57	#NULL!	1	1	1	3	4530.84	5039.62	4396.49	23495.3	6290.58	6520.87	28689	4806.17	27838.2	27838.1	512	1	2	8	2	8	1	2	2	8	8	2	8	2	3	2	8	2	8	8	8	8	1	1	1
2015.01.07	A883924301	A8839243	2012	1	1	1	A883	1	36	#NULL!	3	3	4	2	4530.84	5990.04	#NULL!	#NULL!	6893.1	11524	#NULL!	#NULL!	#NULL!	#NULL!	512	1	1	2	1	2	2	8	8	8	8	2	8	1	8	2	8	1	1	2	1	2	1	1	1
2015.01.07	A883924302	A8839243	2012	1	1	1	A883	2	31	#NULL!	3	3	3	2	4530.84	5589.81	#NULL!	19554.3	6064.44	7432.65	#NULL!	#NULL!	24472.1	#NULL!	512	1	2	8	1	2	2	8	8	8	8	2	8	1	8	2	8	1	2	2	2	2	1	1	1
2015.01.07	A883924303	A8839243	2012	1	1	1	A883	1	8	#NULL!	3	3	1	#NULL!	4530.84	3234.55	#NULL!	#NULL!	3347.34	4795.66	#NULL!	#NULL!	#NULL!	#NULL!	512	1	2	8	1	2	2	8	8	8	8	8	8	8	8	8	8	1	1	2	1	2	1	1	1
2015.01.07	A883924304	A8839243	2012	1	1	1	A883	1	6	76	3	3	1	#NULL!	4530.84	3234.55	#NULL!	#NULL!	3347.34	4795.66	#NULL!	#NULL!	#NULL!	#NULL!	512	1	2	8	1	2	2	8	8	8	8	8	8	8	8	8	8	1	1	2	1	1	1	1	1
2015.01.07	A883924601	A8839246	2012	1	1	1	A883	1	69	#NULL!	4	3	2	7	4530.84	8823.82	#NULL!	13558.1	#NULL!	#NULL!	#NULL!	#NULL!	#NULL!	#NULL!	512	1	1	2	2	8	2	8	2	8	8	2	8	1	8	2	8	1	2	2	1	2	1	1	1
2015.01.07	A883926101	A8839261	2012	1	1	1	A883	1	30	#NULL!	3	4	4	2	4530.84	11279	#NULL!	13952.7	13286.9	19200.6	#NULL!	#NULL!	20792.2	#NULL!	512	1	2	8	1	1	2	8	8	8	8	2	8	1	8	2	8	1	2	1	2	2	2	2	1
2015.01.07	A883926701	A8839267	2012	1	1	1	A883	1	76	#NULL!	3	2	3	7	4530.84	4751.48	7987.06	#NULL!	2589.19	5994.18	#NULL!	8654.23	#NULL!	#NULL!	512	1	2	8	2	8	2	8	2	8	8	2	8	1	8	2	8	2	8	8	8	8	1	1	1
2015.01.07	A883927302	A8839273	2012	1	1	1	A883	2	58	#NULL!	1	1	#NULL!	7	4530.84	6719.49	8792.99	#NULL!	#NULL!	#NULL!	#NULL!	#NULL!	#NULL!	#NULL!	512	1	2	8	2	8	2	8	2	8	8	2	8	1	8	2	8	2	8	8	8	8	1	1	1
2015.01.07	A883928502	A8839285	2012	1	1	1	A883	2	36	#NULL!	3	3	2	5	4530.84	7787.08	#NULL!	#NULL!	9079.84	12794.5	#NULL!	#NULL!	#NULL!	#NULL!	512	1	2	8	2	8	2	8	8	8	8	2	8	1	8	2	8	2	8	8	8	8	1	1	1
2015.01.07	A883928504	A8839285	2012	1	1	1	A883	1	7	#NULL!	3	3	1	#NULL!	4530.84	6469.1	#NULL!	#NULL!	6694.69	9591.32	#NULL!	#NULL!	#NULL!	#NULL!	512	1	2	8	2	8	2	8	8	8	8	8	8	8	8	8	8	2	8	8	8	8	1	1	1
2015.01.07	A883929701	A8839297	2012	1	1	1	A883	1	39	#NULL!	1	1	3	7	4530.84	5990.04	#NULL!	9678.24	#NULL!	#NULL!	#NULL!	#NULL!	#NULL!	#NULL!	512	1	2	8	2	8	2	8	8	8	8	2	8	1	8	2	8	2	8	8	8	8	1	1	1
2015.01.07	A883931501	A8839315	2012	1	1	1	A883	2	63	#NULL!	2	2	1	7	4530.84	3427.13	3578.52	#NULL!	5565.65	4928.25	#NULL!	3795.71	#NULL!	#NULL!	512	1	2	8	2	8	1	2	2	8	8	2	8	1	8	1	2	2	8	8	8	8	1	1	1
2015.01.07	A883931502	A8839315	2012	1	1	1	A883	2	38	#NULL!	1	2	3	3	4530.84	3893.54	#NULL!	28332.5	#NULL!	#NULL!	#NULL!	#NULL!	#NULL!	#NULL!	512	1	2	8	2	8	2	8	8	8	8	2	8	1	8	2	8	2	8	8	8	8	1	1	1
2015.01.07	A883931503	A8839315	2012	1	1	1	A883	1	34	#NULL!	1	2	3	5	4530.84	11279	#NULL!	#NULL!	19930.4	24829.6	#NULL!	#NULL!	#NULL!	#NULL!	512	1	2	8	2	8	2	8	8	8	8	2	8	2	3	2	8	2	8	8	8	8	1	1	1
2015.01.07	A883932102	A8839321	2012	1	1	1	A883	2	40	#NULL!	1	2	3	6	4530.84	7339.41	13772.4	19019.9	8490.55	8413.9	37195.8	13688.7	15621.2	33185.2	512	1	2	8	2	8	2	8	2	8	8	2	8	1	8	2	8	2	8	8	8	8	1	1	1
2015.01.07	A883932103	A8839321	2012	1	1	1	A883	1	11	#NULL!	1	2	1	#NULL!	4530.84	3398.64	#NULL!	9402.33	3459.26	8195.15	#NULL!	#NULL!	10316.4	#NULL!	512	1	2	8	2	8	2	8	8	8	8	8	8	8	8	8	8	2	8	8	8	8	1	1	1
2015.01.07	A883932104	A8839321	2012	1	1	1	A883	1	7	#NULL!	1	2	1	#NULL!	4530.84	3234.55	#NULL!	#NULL!	3347.34	6394.21	#NULL!	#NULL!	#NULL!	#NULL!	512	1	2	8	2	8	2	8	8	8	8	8	8	8	8	8	8	2	8	8	8	8	1	1	1
2015.01.07	A884911701	A8849117	2012	1	1	2	A884	1	76	#NULL!	4	2	3	2	2145.56	1125.02	#NULL!	#NULL!	1042.19	1206.37	#NULL!	#NULL!	#NULL!	#NULL!	501	1	2	8	2	8	2	8	2	8	8	2	8	1	8	2	8	2	8	8	8	8	1	1	1
2015.01.07	A884911702	A8849117	2012	1	1	2	A884	2	74	#NULL!	4	2	1	7	2145.56	1543.7	#NULL!	#NULL!	1402.4	1303.17	#NULL!	#NULL!	#NULL!	#NULL!	501	1	2	8	2	8	2	8	2	8	8	2	8	2	3	2	8	2	8	8	8	8	1	1	1
2015.01.07	A884912301	A8849123	2012	1	1	2	A884	1	56	#NULL!	2	2	3	1	2145.56	2952.96	3405.72	#NULL!	2853.11	2753.17	#NULL!	3519.67	#NULL!	#NULL!	501	1	2	8	2	8	2	8	2	8	8	2	8	1	8	2	8	2	8	8	8	8	1	1	1
2015.01.07	A884912302	A8849123	2012	1	1	2	A884	2	53	#NULL!	2	2	3	7	2145.56	1765.76	2952.03	6224.91	1708.3	2089.1	9910.54	2988.39	8656.21	11853.6	501	1	2	8	2	8	2	8	2	8	8	2	8	1	8	1	2	2	8	8	8	8	1	1	1
2015.01.07	A884912303	A8849123	2012	1	1	2	A884	2	27	#NULL!	1	2	4	3	2145.56	2487	#NULL!	5633.78	2568.05	3447.62	#NULL!	#NULL!	8157.19	#NULL!	501	1	2	8	2	8	2	8	8	8	8	2	8	1	8	2	8	2	8	8	8	8	1	1	1
2015.01.07	A884912304	A8849123	2012	1	1	2	A884	1	17	#NULL!	2	2	2	7	2145.56	3272.44	#NULL!	#NULL!	2985.23	4410.53	#NULL!	#NULL!	#NULL!	#NULL!	501	1	2	8	2	8	2	8	8	8	8	8	8	1	8	2	8	2	8	8	8	8	1	1	1
2015.01.07	A884913502	A8849135	2012	1	1	2	A884	2	52	#NULL!	3	3	1	7	2145.56	7063.04	#NULL!	#NULL!	6833.21	8356.41	#NULL!	#NULL!	#NULL!	#NULL!	501	1	2	8	2	8	2	8	2	8	8	2	8	1	8	2	8	2	8	8	8	8	1	1	1
2015.01.07	A884915601	A8849156	2012	1	1	2	A884	2	73	#NULL!	3	2	1	6	2145.56	1543.7	2385.84	#NULL!	1402.4	1303.17	#NULL!	2248.09	#NULL!	#NULL!	501	1	2	8	2	8	2	8	2	8	8	2	8	2	3	1	2	2	8	8	8	8	1	1	1
2015.01.07	A884916201	A8849162	2012	1	1	2	A884	1	84	#NULL!	1	1	1	6	2145.56	2250.04	#NULL!	#NULL!	1042.19	2412.74	#NULL!	#NULL!	#NULL!	#NULL!	501	1	2	8	2	8	2	8	1	2	2	2	8	1	8	2	8	2	8	8	8	8	1	1	1
2015.01.07	A884916801	A8849168	2012	1	1	2	A884	1	46	#NULL!	3	4	4	5	2145.56	3181.6	5443.33	10033.7	#NULL!	#NULL!	11638	#NULL!	#NULL!	#NULL!	501	1	2	8	2	8	2	8	2	8	8	2	8	1	8	1	2	2	8	8	8	8	1	1	1
2015.01.07	A884916802	A8849168	2012	1	1	2	A884	2	41	#NULL!	3	4	3	1	2145.56	1737.77	3612.12	#NULL!	3417.56	3810.05	#NULL!	6581.97	#NULL!	#NULL!	501	1	2	8	2	8	2	8	2	8	8	2	8	1	8	2	8	2	8	8	8	8	1	1	1
2015.01.07	A884916803	A8849168	2012	1	1	2	A884	1	10	#NULL!	3	4	1	#NULL!	2145.56	1448.47	#NULL!	4808.63	1474.31	3710.99	#NULL!	#NULL!	8793.54	#NULL!	501	1	2	8	1	2	2	8	8	8	8	8	8	8	8	8	8	1	1	1	1	1	1	1	1
2015.01.07	A884918001	A8849180	2012	1	1	2	A884	1	79	#NULL!	3	1	1	7	2145.56	1125.02	2094.78	#NULL!	1042.19	1206.37	#NULL!	2080.61	#NULL!	#NULL!	501	1	2	8	2	8	2	8	2	8	8	2	8	2	3	2	8	2	8	8	8	8	1	1	1
2015.01.07	A884918002	A8849180	2012	1	1	2	A884	2	72	#NULL!	3	1	1	7	2145.56	1543.7	2385.84	#NULL!	1402.4	1303.17	#NULL!	2248.09	#NULL!	#NULL!	501	1	2	8	2	8	2	8	2	8	8	2	8	1	8	2	8	2	8	8	8	8	1	1	1
2015.01.07	A884918301	A8849183	2012	1	1	2	A884	1	77	#NULL!	3	1	3	6	2145.56	1125.02	#NULL!	#NULL!	1042.19	1206.37	#NULL!	#NULL!	#NULL!	#NULL!	501	1	2	8	2	8	2	8	1	2	2	2	8	1	8	2	8	1	1	1	1	2	1	1	1
2015.01.07	A884918302	A8849183	2012	1	1	2	A884	2	78	#NULL!	3	1	1	7	2145.56	1494.09	#NULL!	#NULL!	1265	1303.17	#NULL!	#NULL!	#NULL!	#NULL!	501	1	1	1	2	8	2	8	1	2	2	2	8	1	8	2	8	2	8	8	8	8	1	1	1
2015.01.07	A884918601	A8849186	2012	1	1	2	A884	1	68	#NULL!	2	2	1	6	2145.56	1392.83	#NULL!	4708.29	1474.43	1432.07	#NULL!	#NULL!	4743.9	#NULL!	501	1	2	8	2	8	2	8	2	8	8	2	8	1	8	2	8	2	8	8	8	8	1	1	1
2015.01.07	A884918602	A8849186	2012	1	1	2	A884	2	63	#NULL!	2	2	2	7	2145.56	1622.9	3754.18	#NULL!	1493.5	1322.46	#NULL!	3650.19	#NULL!	#NULL!	501	1	2	8	2	8	2	8	2	8	8	2	8	1	8	2	8	2	8	8	8	8	1	1	1
2015.01.07	A884921301	A8849213	2012	1	1	2	A884	1	57	#NULL!	3	4	2	1	2145.56	2952.96	3405.72	#NULL!	2853.11	2753.17	#NULL!	3519.67	#NULL!	#NULL!	501	1	2	8	2	8	2	8	2	8	8	2	8	1	8	2	8	2	8	8	8	8	1	1	1
2015.01.07	A884921302	A8849213	2012	1	1	2	A884	2	54	#NULL!	3	4	1	7	2145.56	1765.76	2952.03	12449.8	1708.3	2089.1	9910.54	2988.39	12984.3	11853.6	501	1	1	2	2	8	2	8	2	8	8	2	8	1	8	2	8	2	8	8	8	8	1	1	1
2015.01.07	A884921303	A8849213	2012	1	1	2	A884	1	29	#NULL!	3	4	3	5	2145.56	3773.58	#NULL!	#NULL!	4786.47	7806.67	#NULL!	#NULL!	#NULL!	#NULL!	501	1	2	8	2	8	2	8	8	8	8	2	8	1	8	2	8	2	8	8	8	8	1	1	1
2015.01.07	A884922501	A8849225	2012	1	1	2	A884	1	70	#NULL!	1	1	1	7	2145.56	1086.26	#NULL!	#NULL!	1065.13	1206.37	#NULL!	#NULL!	#NULL!	#NULL!	501	1	2	8	2	8	2	8	2	8	8	2	8	1	8	1	1	2	8	8	8	8	1	1	1
2015.01.07	A884922502	A8849225	2012	1	1	2	A884	2	67	#NULL!	1	1	1	7	2145.56	1038.8	#NULL!	#NULL!	1074.26	1107.59	#NULL!	#NULL!	#NULL!	#NULL!	501	1	2	8	2	8	2	8	1	1	1	2	8	2	3	1	1	1	1	1	1	2	1	1	1
2015.01.07	A884924301	A8849243	2012	1	1	2	A884	1	57	#NULL!	2	2	1	5	2145.56	2952.96	3405.72	6861.39	2853.11	2753.17	7245.87	3519.67	6846.43	7989.37	501	1	2	8	2	8	2	8	2	8	8	2	8	2	3	1	2	2	8	8	8	8	1	1	1
2015.01.07	A884924302	A8849243	2012	1	1	2	A884	2	53	#NULL!	1	2	2	7	2145.56	1765.76	2952.03	#NULL!	1708.3	2089.1	#NULL!	2988.39	#NULL!	#NULL!	501	1	1	2	2	8	2	8	2	8	8	2	8	1	8	2	8	1	1	1	1	2	1	1	1
2015.01.07	A884927001	A8849270	2012	1	1	2	A884	1	57	#NULL!	3	3	1	5	2145.56	2952.96	3405.72	6861.39	2853.11	2753.17	7245.87	3519.67	6846.43	7989.37	501	1	2	8	2	8	2	8	2	8	8	2	8	2	3	1	1	1	1	2	1	2	1	1	1
2015.01.07	A884927002	A8849270	2012	1	1	2	A884	2	57	#NULL!	3	3	2	7	2145.56	1590.99	2306.15	#NULL!	1688.03	1749.83	#NULL!	2310.96	#NULL!	#NULL!	501	1	2	8	2	8	2	8	2	8	8	2	8	1	8	2	8	2	8	8	8	8	1	1	1
2015.01.07	A884927901	A8849279	2012	1	1	2	A884	1	48	#NULL!	3	4	4	3	2145.56	4772.4	5443.33	15050.5	6172.96	7930.7	11638	6985.34	11404.8	16505.7	501	1	2	8	2	8	1	2	2	8	8	2	8	1	8	2	8	2	8	8	8	8	1	1	1
2015.01.07	A884927902	A8849279	2012	1	1	2	A884	2	46	#NULL!	3	4	4	1	2145.56	4201.54	4084.69	#NULL!	3520.22	3908.99	#NULL!	3928.01	#NULL!	#NULL!	501	1	2	8	2	8	2	8	2	8	8	2	8	1	8	2	8	2	8	8	8	8	1	1	1
2015.01.07	A884927905	A8849279	2012	1	1	2	A884	1	13	#NULL!	3	4	1	#NULL!	2145.56	1448.47	#NULL!	4808.63	2184.16	3298.66	#NULL!	#NULL!	5862.36	#NULL!	501	1	2	8	2	8	2	8	8	8	8	8	8	1	8	2	8	2	8	8	8	8	1	1	1
2015.01.07	A884929101	A8849291	2012	1	1	2	A884	1	48	#NULL!	4	4	3	5	2145.56	3181.6	5443.33	#NULL!	4629.72	5948.03	#NULL!	6985.34	#NULL!	#NULL!	501	1	2	8	2	8	2	8	2	8	8	2	8	1	8	2	8	2	8	8	8	8	1	1	1
2015.01.07	A884929102	A8849291	2012	1	1	2	A884	2	44	#NULL!	4	4	3	7	2145.56	1737.77	3612.12	7430.61	1708.78	2540.03	12078.1	3290.98	8876.82	12571.8	501	1	2	8	1	2	2	8	2	8	8	2	8	1	8	2	8	1	1	1	1	2	1	1	1
2015.01.07	A884929103	A8849291	2012	1	1	2	A884	2	19	#NULL!	4	4	3	1	2145.56	2628.43	#NULL!	10015.4	2810.41	4362.79	#NULL!	#NULL!	8365.71	#NULL!	501	1	2	8	2	8	2	8	8	8	8	2	8	1	8	2	8	1	1	1	1	2	1	1	1
2015.01.07	A884929104	A8849291	2012	1	1	2	A884	1	17	#NULL!	4	4	2	7	2145.56	3272.44	#NULL!	#NULL!	2985.23	4410.53	#NULL!	#NULL!	#NULL!	#NULL!	501	1	2	8	2	8	1	2	8	8	8	8	8	1	8	2	8	2	8	8	8	8	1	1	1
2015.01.07	A884929701	A8849297	2012	1	1	2	A884	1	71	#NULL!	2	1	#NULL!	#NULL!	2145.56	1629.4	3142.17	#NULL!	1597.7	1809.56	#NULL!	3120.92	#NULL!	#NULL!	501	1	2	8	2	8	2	8	1	2	2	2	8	1	8	1	1	2	8	8	8	8	1	1	1
2015.01.07	A884929702	A8849297	2012	1	1	2	A884	2	67	#NULL!	2	1	1	7	2145.56	1558.19	2367.04	#NULL!	1611.39	1661.38	#NULL!	2246.14	#NULL!	#NULL!	501	1	2	8	2	8	2	8	1	1	2	2	8	2	3	1	1	2	8	8	8	8	1	1	1
2015.01.07	A884931501	A8849315	2012	1	1	2	A884	2	73	#NULL!	1	1	1	7	2145.56	1543.7	2385.84	#NULL!	1402.4	1303.17	#NULL!	2248.09	#NULL!	#NULL!	501	1	2	8	2	8	2	8	2	8	8	2	8	1	8	1	1	2	8	8	8	8	1	1	1
2015.01.07	A884932401	A8849324	2012	1	1	2	A884	1	40	#NULL!	4	4	4	3	2145.56	3523.87	6929.02	#NULL!	3989.21	6963.44	#NULL!	9603.22	#NULL!	#NULL!	501	1	2	8	2	8	2	8	2	8	8	2	8	1	8	2	8	2	8	8	8	8	1	1	1
2015.01.07	A884932402	A8849324	2012	1	1	2	A884	2	39	#NULL!	4	4	4	1	2145.56	1843.77	#NULL!	9838.95	1827.38	2574.98	#NULL!	#NULL!	8732.84	#NULL!	501	1	2	8	2	8	2	8	8	8	8	2	8	1	8	2	8	2	8	8	8	8	1	1	1
2015.01.07	A884932403	A8849324	2012	1	1	2	A884	1	9	#NULL!	4	4	1	#NULL!	2145.56	1378.54	#NULL!	#NULL!	1426.61	1930.32	#NULL!	#NULL!	#NULL!	#NULL!	501	1	2	8	2	8	1	2	8	8	8	8	8	8	8	8	8	2	8	8	8	8	1	1	1
2015.01.07	A885906901	A8859069	2012	1	1	2	A885	2	78	#NULL!	4	3	3	7	3332.23	2320.44	3129	#NULL!	2245.3	2313.06	#NULL!	3484.4	#NULL!	#NULL!	501	1	2	8	2	8	2	8	2	8	8	2	8	1	8	2	8	2	8	8	8	8	1	1	1
2015.01.07	A885908101	A8859081	2012	1	1	2	A885	1	41	#NULL!	3	4	4	1	3332.23	5472.84	9087.34	#NULL!	#NULL!	#NULL!	#NULL!	#NULL!	#NULL!	#NULL!	501	1	2	8	2	8	2	8	2	8	8	2	8	1	8	2	8	2	8	8	8	8	1	1	1
2015.01.07	A885908102	A8859081	2012	1	1	2	A885	2	37	#NULL!	3	4	4	7	3332.23	2863.52	#NULL!	12224.5	4324.67	6093.94	#NULL!	#NULL!	13562.8	#NULL!	501	1	2	8	2	8	2	8	8	8	8	2	8	1	8	2	8	2	8	8	8	8	1	1	1
2015.01.07	A885908103	A8859081	2012	1	1	2	A885	1	13	#NULL!	3	4	1	#NULL!	3332.23	1999.64	#NULL!	6638.38	3876.77	5854.95	#NULL!	#NULL!	9104.71	#NULL!	501	1	2	8	2	8	2	8	8	8	8	8	8	1	8	2	8	2	8	8	8	8	1	1	1
2015.01.07	A885908104	A8859081	2012	1	1	2	A885	1	12	#NULL!	3	4	1	#NULL!	3332.23	1999.64	#NULL!	#NULL!	3876.77	5854.95	#NULL!	#NULL!	#NULL!	#NULL!	501	1	2	8	2	8	2	8	8	8	8	8	8	1	8	1	1	2	8	8	8	8	1	1	1
2015.01.07	A885909601	A8859096	2012	1	1	2	A885	2	69	#NULL!	4	4	3	7	3332.23	3226.67	2069.56	#NULL!	3813.5	3931.83	#NULL!	2320.92	#NULL!	#NULL!	501	1	2	8	2	8	2	8	2	8	8	2	8	1	8	2	8	2	8	8	8	8	1	1	1
2015.01.07	A885911102	A8859111	2012	1	1	2	A885	2	46	#NULL!	4	4	4	1	3332.23	5800.29	10714	#NULL!	6248.2	6938.26	#NULL!	12176.4	#NULL!	#NULL!	501	1	2	8	2	8	2	8	2	8	8	2	8	1	8	1	1	2	8	8	8	8	1	1	1
2015.01.07	A885911103	A8859111	2012	1	1	2	A885	2	21	#NULL!	4	4	3	7	3332.23	4781.13	#NULL!	10214.5	5292.7	8519.66	#NULL!	#NULL!	12906.5	#NULL!	501	1	2	8	2	8	2	8	8	8	8	2	8	1	8	2	8	2	8	8	8	8	1	1	1
2015.01.07	A885911104	A8859111	2012	1	1	2	A885	2	19	#NULL!	4	4	3	7	3332.23	5442.87	#NULL!	16591.7	6651.11	10325	#NULL!	#NULL!	12992.6	#NULL!	501	1	2	8	2	8	2	8	8	8	8	2	8	1	8	2	8	2	8	8	8	8	1	1	1
2015.01.07	A885912301	A8859123	2012	1	1	2	A885	2	54	#NULL!	1	1	1	6	3332.23	5484.73	3871.55	#NULL!	6064.3	7416.1	#NULL!	4631.83	#NULL!	#NULL!	501	1	2	8	2	8	2	8	2	8	8	2	8	1	8	1	1	2	8	8	8	8	2	1	1
2015.01.07	A885914102	A8859141	2012	1	1	2	A885	2	62	#NULL!	4	4	3	3	3332.23	5040.99	4923.56	#NULL!	2650.89	4694.59	#NULL!	5657.58	#NULL!	#NULL!	501	1	2	8	2	8	1	2	2	8	8	2	8	2	3	1	2	2	8	8	8	8	1	1	1
2015.01.07	A885915001	A8859150	2012	1	1	2	A885	1	57	#NULL!	3	4	4	2	3332.23	6879.27	4466.56	6393.77	#NULL!	#NULL!	11086.7	#NULL!	#NULL!	#NULL!	501	1	2	8	2	8	2	8	2	8	8	2	8	2	3	2	8	2	8	8	8	8	1	2	1
2015.01.07	A885915002	A8859150	2012	1	1	2	A885	2	54	#NULL!	3	4	3	1	3332.23	4113.55	3871.55	7734.22	#NULL!	#NULL!	15163.8	#NULL!	#NULL!	#NULL!	501	1	2	8	1	2	2	8	2	8	8	2	8	1	8	2	8	1	2	2	1	2	1	2	1
2015.01.07	A885916201	A8859162	2012	1	1	2	A885	1	41	#NULL!	3	3	#NULL!	#NULL!	3332.23	5472.84	#NULL!	#NULL!	#NULL!	#NULL!	#NULL!	#NULL!	#NULL!	#NULL!	501	1	1	2	2	8	2	8	2	8	8	2	8	1	8	2	8	2	8	8	8	8	1	1	1
2015.01.07	A885916202	A8859162	2012	1	1	2	A885	2	41	#NULL!	3	3	3	3	3332.23	2698.9	7105.88	#NULL!	4549.5	5635.53	#NULL!	7651.25	#NULL!	#NULL!	501	1	2	8	1	2	2	8	2	8	8	2	8	1	8	2	8	1	2	1	1	2	1	1	1
2015.01.07	A885916203	A8859162	2012	1	1	2	A885	2	7	#NULL!	3	3	1	#NULL!	3332.23	2840.66	#NULL!	#NULL!	2715.4	5493.19	#NULL!	#NULL!	#NULL!	#NULL!	501	1	2	8	2	8	2	8	8	8	8	8	8	8	8	8	8	2	8	8	8	8	1	1	1
2015.01.07	A885916204	A8859162	2012	1	1	2	A885	2	5	67	3	3	1	#NULL!	3332.23	2840.66	#NULL!	#NULL!	2715.4	5493.19	#NULL!	#NULL!	#NULL!	#NULL!	501	1	2	8	2	8	2	8	8	8	8	8	8	8	8	8	8	8	8	8	8	8	8	8	8
2015.01.07	A885916205	A8859162	2012	1	1	2	A885	2	71	#NULL!	4	3	1	7	3332.23	2397.48	4693.51	#NULL!	3733.79	2891.32	#NULL!	5226.6	#NULL!	#NULL!	501	1	2	8	2	8	2	8	2	8	8	2	8	2	3	1	1	2	8	8	8	8	1	1	1
2015.01.07	A885918001	A8859180	2012	1	1	2	A885	1	38	#NULL!	4	4	4	1	3332.23	4405.4	#NULL!	6263.75	#NULL!	#NULL!	#NULL!	#NULL!	#NULL!	#NULL!	501	1	2	8	2	8	2	8	8	8	8	2	8	1	8	2	8	2	8	8	8	8	1	1	1
2015.01.07	A885918002	A8859180	2012	1	1	2	A885	2	36	#NULL!	4	4	4	1	3332.23	2863.52	#NULL!	6112.27	6487.01	6093.94	#NULL!	#NULL!	13562.8	#NULL!	501	1	1	2	1	2	2	8	8	8	8	2	8	1	8	2	8	1	1	2	1	2	1	1	1
2015.01.07	A885918003	A8859180	2012	1	1	2	A885	1	7	#NULL!	4	4	1	#NULL!	3332.23	1903.09	#NULL!	#NULL!	1969.45	4568.29	#NULL!	#NULL!	#NULL!	#NULL!	501	1	2	8	2	8	2	8	8	8	8	8	8	8	8	8	8	2	8	8	8	8	1	1	1
2015.01.07	A885918004	A8859180	2012	1	1	2	A885	1	4	51	4	4	1	#NULL!	3332.23	1972.52	#NULL!	#NULL!	2027.44	4352.72	#NULL!	#NULL!	#NULL!	#NULL!	501	1	2	8	2	8	2	8	8	8	8	8	8	8	8	8	8	8	8	8	8	8	8	8	8
2015.01.07	A885920103	A8859201	2012	1	1	2	A885	2	28	#NULL!	#NULL!	#NULL!	4	7	3332.23	11587.5	#NULL!	13999.5	#NULL!	#NULL!	#NULL!	#NULL!	#NULL!	#NULL!	501	1	2	8	2	8	2	8	8	8	8	2	8	1	8	2	8	2	8	8	8	8	1	1	1
2015.01.07	A885921601	A8859216	2012	1	1	2	A885	1	55	#NULL!	4	4	4	2	3332.23	6114.9	4466.56	#NULL!	6752.15	6515.65	#NULL!	5455.29	#NULL!	#NULL!	501	1	2	8	2	8	2	8	2	8	8	2	8	1	8	2	8	2	8	8	8	8	1	1	1
2015.01.07	A885921602	A8859216	2012	1	1	2	A885	2	52	#NULL!	4	4	3	7	3332.23	3656.48	3871.55	#NULL!	4042.86	4944.06	#NULL!	4631.83	#NULL!	#NULL!	501	1	2	8	1	2	2	8	2	8	8	2	8	1	8	2	8	1	1	1	1	2	1	1	1
2015.01.07	A885921603	A8859216	2012	1	1	2	A885	1	27	#NULL!	4	4	4	3	3332.23	7814.22	#NULL!	19562.5	11327.6	18475.2	#NULL!	#NULL!	32988.7	#NULL!	501	1	2	8	1	2	2	8	8	8	8	2	8	1	8	2	8	1	1	2	1	2	1	1	1
2015.01.07	A885924302	A8859243	2012	1	1	2	A885	2	43	#NULL!	4	4	4	7	3332.23	5397.8	9474.51	12309.7	6065.99	6762.64	36960.7	10201.7	10339.8	49463.2	501	1	2	8	2	8	2	8	2	8	8	2	8	1	8	1	1	2	8	8	8	8	1	1	1
2015.01.07	A885924303	A8859243	2012	1	1	2	A885	1	10	#NULL!	4	4	1	#NULL!	3332.23	1999.64	#NULL!	3319.19	2035.3	6586.82	#NULL!	#NULL!	6828.53	#NULL!	501	1	1	2	2	8	2	8	8	8	8	8	8	8	8	8	8	2	8	8	8	8	1	1	1
2015.01.07	A885927002	A8859270	2012	1	1	2	A885	2	64	#NULL!	4	4	3	7	3332.23	5040.99	4923.56	8024.37	5301.77	4694.59	22518	5657.58	10293.3	32819	501	1	2	8	2	8	2	8	2	8	8	2	8	1	8	2	8	2	8	8	8	8	1	1	1
2015.01.07	A885927301	A8859273	2012	1	1	2	A885	2	63	#NULL!	2	2	2	7	3332.23	5040.99	2461.78	#NULL!	5301.77	4694.59	#NULL!	2828.79	#NULL!	#NULL!	501	1	2	8	2	8	2	8	2	8	8	2	8	2	3	1	1	2	8	8	8	8	1	1	1
2015.01.07	A885931201	A8859312	2012	1	1	2	A885	1	46	#NULL!	4	4	4	1	3332.23	4941.28	#NULL!	12466.5	#NULL!	#NULL!	#NULL!	#NULL!	#NULL!	#NULL!	501	1	1	2	2	8	2	8	2	8	8	2	8	1	8	2	8	2	8	8	8	8	1	1	1
2015.01.07	A885931202	A8859312	2012	1	1	2	A885	2	43	#NULL!	4	4	3	7	3332.23	2698.9	9474.51	#NULL!	4044	6011.23	#NULL!	10201.7	#NULL!	#NULL!	501	1	2	8	1	2	2	8	2	8	8	2	8	1	8	2	8	1	2	2	1	2	1	1	1
2015.01.07	A885931203	A8859312	2012	1	1	2	A885	1	14	#NULL!	4	4	1	#NULL!	3332.23	1999.64	#NULL!	#NULL!	3876.77	5854.95	#NULL!	#NULL!	#NULL!	#NULL!	501	1	1	2	1	2	2	8	8	8	8	8	8	1	8	2	8	1	2	2	1	2	1	2	1
2015.01.07	A885931204	A8859312	2012	1	1	2	A885	1	12	#NULL!	4	4	1	#NULL!	3332.23	1999.64	#NULL!	6638.38	3876.77	5854.95	#NULL!	#NULL!	18209.4	#NULL!	501	1	2	8	1	2	1	2	8	8	8	8	8	1	8	2	8	1	1	1	1	2	1	1	1
2015.01.07	A885932101	A8859321	2012	1	1	2	A885	2	38	#NULL!	4	4	4	7	3332.23	8590.56	#NULL!	18336.8	9730.52	9140.91	#NULL!	#NULL!	20344.2	#NULL!	501	1	2	8	1	2	2	8	8	8	8	2	8	1	8	2	8	1	2	1	1	2	1	1	1
2015.01.07	A885932103	A8859321	2012	1	1	2	A885	1	9	#NULL!	4	4	1	#NULL!	3332.23	1903.09	#NULL!	#NULL!	1969.45	6852.43	#NULL!	#NULL!	#NULL!	#NULL!	501	1	2	8	1	2	2	8	8	8	8	8	8	8	8	8	8	1	2	2	1	2	1	1	1
2015.01.07	A886915902	A8869159	2012	1	1	1	A886	2	51	#NULL!	1	2	#NULL!	#NULL!	5590.29	5750.88	#NULL!	#NULL!	7081.14	8659.61	#NULL!	#NULL!	#NULL!	#NULL!	512	1	2	8	2	8	2	8	2	8	8	2	8	3	3	1	1	2	8	8	8	8	1	1	1
2015.01.07	A886915903	A8869159	2012	1	1	1	A886	2	28	#NULL!	1	2	3	7	5590.29	8099.89	#NULL!	#NULL!	10644.9	14290.8	#NULL!	#NULL!	#NULL!	#NULL!	512	1	2	8	2	8	2	8	8	8	8	2	8	1	8	2	8	2	8	8	8	8	1	1	1
2015.01.07	A886915904	A8869159	2012	1	1	1	A886	1	25	#NULL!	1	2	3	6	5590.29	12290.1	#NULL!	39884.1	19840.5	26219.3	#NULL!	#NULL!	67510.5	#NULL!	512	1	2	8	2	8	2	8	8	8	8	2	8	1	8	2	8	2	8	8	8	8	1	1	1
2015.01.07	A886915905	A8869159	2012	1	1	1	A886	1	23	#NULL!	2	2	3	7	5590.29	21593.9	#NULL!	#NULL!	30402.6	29528.7	#NULL!	#NULL!	#NULL!	#NULL!	512	1	2	8	2	8	2	8	8	8	8	2	8	1	8	2	8	2	8	8	8	8	1	1	1
2015.01.07	A886916501	A8869165	2012	1	1	1	A886	1	46	#NULL!	1	2	3	2	5590.29	8289.7	12350.5	20333.4	#NULL!	#NULL!	26067.1	#NULL!	#NULL!	#NULL!	512	1	2	8	2	8	2	8	2	8	8	2	8	1	8	2	8	2	8	8	8	8	1	1	1
2015.01.07	A886916502	A8869165	2012	1	1	1	A886	2	42	#NULL!	1	2	3	3	5590.29	4527.79	8195.59	#NULL!	#NULL!	#NULL!	#NULL!	#NULL!	#NULL!	#NULL!	512	1	2	8	2	8	2	8	2	8	8	2	8	1	8	2	8	2	8	8	8	8	1	1	1
2015.01.07	A886916503	A8869165	2012	1	1	1	A886	2	18	#NULL!	2	2	3	3	5590.29	15138.6	#NULL!	#NULL!	#NULL!	#NULL!	#NULL!	#NULL!	#NULL!	#NULL!	512	1	2	8	2	8	2	8	8	8	8	8	8	1	8	1	1	2	8	8	8	8	1	1	1
2015.01.07	A886916504	A8869165	2012	1	1	1	A886	2	15	#NULL!	2	2	2	7	5590.29	15138.6	#NULL!	57684.3	#NULL!	#NULL!	#NULL!	#NULL!	#NULL!	#NULL!	512	1	2	8	2	8	2	8	8	8	8	8	8	1	8	2	8	2	8	8	8	8	1	1	1
2015.01.07	A886916505	A8869165	2012	1	1	1	A886	2	11	#NULL!	1	2	1	#NULL!	5590.29	3345.9	#NULL!	#NULL!	#NULL!	#NULL!	#NULL!	#NULL!	#NULL!	#NULL!	512	1	2	8	2	8	2	8	8	8	8	8	8	8	8	8	8	2	8	8	8	8	1	1	1
2015.01.07	A886916801	A8869168	2012	1	1	1	A886	1	63	#NULL!	2	2	1	5	5590.29	5746.22	5298.51	#NULL!	8607.07	5761.79	#NULL!	6743.25	#NULL!	#NULL!	512	1	2	8	2	8	2	8	1	2	2	2	8	1	8	2	8	2	8	8	8	8	1	1	1
2015.01.07	A886916802	A8869168	2012	1	1	1	A886	2	61	#NULL!	3	2	1	7	5590.29	4228.49	4258.95	#NULL!	4952.61	4385.41	#NULL!	5061.21	#NULL!	#NULL!	512	1	2	8	2	8	2	8	1	2	2	2	8	1	8	2	8	2	8	8	8	8	1	1	1
2015.01.07	A886919201	A8869192	2012	1	1	1	A886	2	58	#NULL!	2	3	3	6	5590.29	4145.35	5232.46	12400.9	8396.54	8703.91	20865.8	6408.56	36065	30370.4	512	1	2	8	2	8	2	8	2	8	8	2	8	1	8	2	8	2	8	8	8	8	1	1	1
2015.01.07	A886919202	A8869192	2012	1	1	1	A886	1	63	#NULL!	2	3	3	3	5590.29	5746.22	5298.51	#NULL!	12910.6	8642.68	#NULL!	6743.25	#NULL!	#NULL!	512	1	2	8	2	8	2	8	2	8	8	2	8	1	8	2	8	2	8	8	8	8	1	1	1
2015.01.07	A886919204	A8869192	2012	1	1	1	A886	1	31	#NULL!	2	3	4	1	5590.29	13916.4	#NULL!	22093	#NULL!	#NULL!	#NULL!	#NULL!	#NULL!	#NULL!	512	1	2	8	2	8	2	8	8	8	8	2	8	1	8	1	2	1	1	1	1	2	1	1	1
2015.01.07	A886919801	A8869198	2012	1	1	1	A886	1	65	#NULL!	4	3	3	6	5590.29	3629.03	#NULL!	#NULL!	4889.35	4748.89	#NULL!	#NULL!	#NULL!	#NULL!	512	1	2	8	2	8	2	8	2	8	8	2	8	1	8	2	8	2	8	8	8	8	1	1	1
2015.01.07	A886919802	A8869198	2012	1	1	1	A886	2	63	#NULL!	3	3	4	6	5590.29	4228.49	8517.91	13088.1	4952.61	4385.41	16481.7	10122.4	20146.5	24021.4	512	1	1	2	2	8	2	8	1	3	2	2	8	2	3	2	8	1	1	2	1	2	2	1	1
2015.01.07	A886923401	A8869234	2012	1	1	1	A886	1	68	#NULL!	2	2	1	6	5590.29	3629.03	#NULL!	7156.05	4889.35	4748.89	#NULL!	#NULL!	10815.3	#NULL!	512	1	2	8	2	8	2	8	1	3	2	2	8	2	3	2	8	2	8	8	8	8	1	1	1
2015.01.07	A886923402	A8869234	2012	1	1	1	A886	2	61	#NULL!	2	2	3	6	5590.29	4228.49	#NULL!	#NULL!	4952.61	4385.41	#NULL!	#NULL!	#NULL!	#NULL!	512	1	2	8	1	2	2	8	2	8	8	2	8	1	8	1	1	2	8	8	8	8	1	1	1
2015.01.07	A886923403	A8869234	2012	1	1	1	A886	1	34	#NULL!	1	2	3	7	5590.29	13916.4	#NULL!	22093	17735.1	24829.6	#NULL!	#NULL!	40405.2	#NULL!	512	1	2	8	2	8	1	2	8	8	8	2	8	1	8	1	1	2	8	8	8	8	1	1	1
2015.01.07	A886924601	A8869246	2012	1	1	1	A886	1	72	#NULL!	4	3	1	7	5590.29	2830.28	#NULL!	#NULL!	3532.09	4000.46	#NULL!	#NULL!	#NULL!	#NULL!	512	1	2	8	2	8	2	8	2	8	8	2	8	1	8	2	8	1	1	1	1	2	1	1	1
2015.01.07	A886924602	A8869246	2012	1	1	1	A886	2	69	#NULL!	4	3	1	7	5590.29	2706.6	5370.61	#NULL!	3562.35	3672.88	#NULL!	6228.8	#NULL!	#NULL!	512	1	1	2	2	8	2	8	1	3	2	2	8	1	8	2	8	1	1	2	1	2	1	1	1
2015.01.07	A886924603	A8869246	2012	1	1	1	A886	2	40	#NULL!	3	3	4	1	5590.29	4527.79	12293.4	20077.6	5666.5	8423.02	40579.3	13689.4	26983.4	54305.9	512	1	1	2	1	2	2	8	2	8	8	2	8	1	8	2	8	1	2	2	2	1	2	2	1
2015.01.07	A886924604	A8869246	2012	1	1	1	A886	2	38	#NULL!	3	3	3	1	5590.29	4803.97	#NULL!	19938.7	6059.79	8538.9	#NULL!	#NULL!	26545.8	#NULL!	512	1	2	8	1	2	2	8	8	8	8	2	8	1	8	2	8	1	1	1	1	2	1	1	1
2015.01.07	A886925801	A8869258	2012	1	1	1	A886	1	81	#NULL!	3	2	4	7	5590.29	2931.26	4752.88	#NULL!	3456	4000.46	#NULL!	5769.78	#NULL!	#NULL!	512	1	2	8	2	8	2	8	1	3	2	2	8	1	8	2	8	2	8	8	8	8	1	1	1
2015.01.07	A886927301	A8869273	2012	1	1	1	A886	1	24	#NULL!	2	3	3	3	5590.29	19834.6	#NULL!	9813.6	#NULL!	#NULL!	#NULL!	#NULL!	#NULL!	#NULL!	512	1	2	8	2	8	2	8	8	8	8	2	8	2	3	2	8	2	8	8	8	8	1	1	1
2015.01.07	A886930301	A8869303	2012	1	1	1	A886	2	45	#NULL!	1	1	3	7	5590.29	7298.11	9267.81	10497.9	#NULL!	#NULL!	14106.2	#NULL!	#NULL!	#NULL!	512	1	2	8	2	8	2	8	2	8	8	2	8	2	3	1	2	2	8	8	8	8	1	1	1
2015.01.07	A886931202	A8869312	2012	1	1	1	A886	1	66	#NULL!	2	2	#NULL!	#NULL!	5590.29	7258.06	#NULL!	#NULL!	9778.7	9497.77	#NULL!	#NULL!	#NULL!	#NULL!	512	1	2	8	2	8	2	8	2	8	8	2	8	1	8	2	8	2	8	8	8	8	1	1	1
2015.01.07	A886931203	A8869312	2012	1	1	1	A886	2	67	#NULL!	2	2	2	6	5590.29	5413.19	7160.81	#NULL!	7124.7	7345.77	#NULL!	8305.06	#NULL!	#NULL!	512	1	2	8	2	8	2	8	1	3	2	2	8	1	8	1	1	2	8	8	8	8	1	1	1
2015.01.07	A886931801	A8869318	2012	1	1	1	A886	1	61	#NULL!	1	2	2	3	5590.29	5746.22	10597	#NULL!	8607.07	5761.79	#NULL!	13486.5	#NULL!	#NULL!	512	1	2	8	1	2	2	8	2	8	8	2	8	1	8	2	8	2	8	8	8	8	1	1	1
2015.01.07	A886931802	A8869318	2012	1	1	1	A886	2	80	#NULL!	3	2	#NULL!	#NULL!	5590.29	3892.86	#NULL!	#NULL!	4194.86	4321.45	#NULL!	#NULL!	#NULL!	#NULL!	512	1	2	8	2	8	2	8	1	3	2	2	8	1	8	1	1	2	8	8	8	8	1	1	1
2015.01.07	A886932401	A8869324	2012	1	1	1	A886	1	52	#NULL!	2	3	2	1	5590.29	10715.4	11221.4	20735.4	17220.6	19346.3	24906.9	15795.8	61099.5	37372.5	512	1	2	8	2	8	2	8	2	8	8	2	8	1	8	2	8	1	1	2	1	2	1	1	1
2015.01.07	A886932402	A8869324	2012	1	1	1	A886	2	46	#NULL!	2	3	2	2	5590.29	7298.11	9267.81	#NULL!	11673.4	12962.6	#NULL!	10892.8	#NULL!	#NULL!	512	1	2	8	2	8	2	8	2	8	8	2	8	1	8	2	8	2	8	8	8	8	1	1	1
2015.01.07	A886932403	A8869324	2012	1	1	1	A886	1	22	#NULL!	3	3	4	7	5590.29	19834.6	#NULL!	19627.2	#NULL!	#NULL!	#NULL!	#NULL!	#NULL!	#NULL!	512	1	2	8	1	2	2	8	8	8	8	2	8	1	8	2	8	1	2	2	2	1	2	2	1
2015.01.07	A886932404	A8869324	2012	1	1	1	A886	2	21	#NULL!	3	3	3	7	5590.29	6015.78	#NULL!	#NULL!	9888.26	15917.2	#NULL!	#NULL!	#NULL!	#NULL!	512	1	2	8	1	2	2	8	8	8	8	2	8	1	8	2	8	1	1	2	2	2	1	1	1
2015.01.07	A887920102	A8879201	2012	1	1	2	A887	2	43	#NULL!	4	4	4	2	1615.63	2617.11	4159.93	#NULL!	1447.57	2869	#NULL!	4602.25	#NULL!	#NULL!	501	1	2	8	2	8	2	8	2	8	8	2	8	1	8	2	8	2	8	8	8	8	1	1	1
2015.01.07	A887920103	A8879201	2012	1	1	2	A887	1	16	#NULL!	4	4	2	7	1615.63	2464.18	#NULL!	4503.1	2528.89	4981.75	#NULL!	#NULL!	5708.8	#NULL!	501	1	2	8	2	8	2	8	8	8	8	8	8	1	8	2	8	2	8	8	8	8	1	1	1
2015.01.07	A887920104	A8879201	2012	1	1	2	A887	2	12	#NULL!	4	4	1	#NULL!	1615.63	1181.1	#NULL!	3316.33	1256.23	2489.09	#NULL!	#NULL!	2946.26	#NULL!	501	1	2	8	2	8	2	8	8	8	8	8	8	1	8	2	8	2	8	8	8	8	1	1	1
2015.01.07	A887921601	A8879216	2012	1	1	2	A887	1	38	#NULL!	4	4	4	1	1615.63	2135.95	#NULL!	#NULL!	3525.65	4715.39	#NULL!	#NULL!	#NULL!	#NULL!	501	1	2	8	2	8	2	8	8	8	8	2	8	1	8	2	8	1	1	1	1	2	1	1	1
2015.01.07	A887921602	A8879216	2012	1	1	2	A887	2	32	#NULL!	4	4	4	7	1615.63	1993.24	#NULL!	9413.19	3101.81	3041.29	#NULL!	#NULL!	8835.42	#NULL!	501	1	2	8	2	8	2	8	8	8	8	2	8	1	8	2	8	2	8	8	8	8	1	1	1
2015.01.07	A887921603	A8879216	2012	1	1	2	A887	2	6	82	4	4	1	#NULL!	1615.63	2065.94	#NULL!	#NULL!	1481.13	2516.88	#NULL!	#NULL!	#NULL!	#NULL!	501	1	2	8	2	8	2	8	8	8	8	8	8	8	8	8	8	2	8	8	8	8	1	1	1
2015.01.07	A887921604	A8879216	2012	1	1	2	A887	2	5	60	4	4	1	#NULL!	1615.63	2065.94	#NULL!	#NULL!	1481.13	2516.88	#NULL!	#NULL!	#NULL!	#NULL!	501	1	2	8	2	8	2	8	8	8	8	8	8	8	8	8	8	8	8	8	8	8	8	8	8
2015.01.07	A887921605	A8879216	2012	1	1	2	A887	1	2	28	4	4	1	#NULL!	1615.63	1434.56	#NULL!	#NULL!	2211.75	1869.69	#NULL!	#NULL!	#NULL!	#NULL!	501	1	8	8	8	8	8	8	8	8	8	8	8	8	8	8	8	8	8	8	8	8	8	8	8
2015.01.07	A887921606	A8879216	2012	1	1	2	A887	1	60	#NULL!	4	4	4	7	1615.63	1660.69	1344.71	#NULL!	#NULL!	#NULL!	#NULL!	#NULL!	#NULL!	#NULL!	501	1	2	8	2	8	2	8	2	8	8	2	8	1	8	2	8	2	8	8	8	8	1	1	1
2015.01.07	A887922801	A8879228	2012	1	1	2	A887	1	69	#NULL!	2	2	2	7	1615.63	1573.22	3629.22	4351.15	1873.55	1819.73	7279.76	4226.08	4018.72	7144.39	501	1	2	8	2	8	2	8	2	8	8	2	8	1	8	2	8	2	8	8	8	8	1	1	1
2015.01.07	A887922802	A8879228	2012	1	1	2	A887	2	67	#NULL!	3	2	#NULL!	#NULL!	1615.63	1173.33	#NULL!	#NULL!	1365.06	1407.42	#NULL!	#NULL!	#NULL!	#NULL!	501	1	2	8	2	8	2	8	2	8	8	2	8	1	8	2	8	2	8	8	8	8	1	1	1
2015.01.07	A887923101	A8879231	2012	1	1	2	A887	1	65	#NULL!	#NULL!	#NULL!	4	3	1615.63	1048.81	1209.74	#NULL!	1249.04	1213.15	#NULL!	1408.69	#NULL!	#NULL!	501	1	2	8	2	8	2	8	2	8	8	2	8	1	8	2	8	2	8	8	8	8	1	1	1
2015.01.07	A887923102	A8879231	2012	1	1	2	A887	2	61	#NULL!	#NULL!	#NULL!	4	7	1615.63	1222.06	1080.88	3979.03	1265.2	1120.3	5540.99	1276.15	3743.01	5383.85	501	1	2	8	2	8	2	8	2	8	8	2	8	1	8	2	8	2	8	8	8	8	1	1	1
2015.01.07	A887923401	A8879234	2012	1	1	2	A887	1	63	#NULL!	4	4	4	7	1615.63	1660.69	#NULL!	#NULL!	2198.77	1471.91	#NULL!	#NULL!	#NULL!	#NULL!	501	1	2	8	2	8	2	8	2	8	8	2	8	1	8	2	8	2	8	8	8	8	1	1	1
2015.01.07	A887923402	A8879234	2012	1	1	2	A887	2	62	#NULL!	4	4	4	7	1615.63	1222.06	2161.77	#NULL!	1265.2	1120.3	#NULL!	2552.29	#NULL!	#NULL!	501	1	2	8	2	8	2	8	2	8	8	2	8	1	8	2	8	2	8	8	8	8	1	1	1
2015.01.07	A887924001	A8879240	2012	1	1	2	A887	1	81	#NULL!	1	1	3	7	1615.63	847.151	#NULL!	#NULL!	#NULL!	#NULL!	#NULL!	#NULL!	#NULL!	#NULL!	501	1	2	8	2	8	2	8	2	8	8	2	8	1	8	2	8	2	8	8	8	8	1	1	1
2015.01.07	A887924002	A8879240	2012	1	1	2	A887	2	74	#NULL!	1	1	3	7	1615.63	1162.42	2747.68	#NULL!	#NULL!	#NULL!	#NULL!	#NULL!	#NULL!	#NULL!	501	1	2	8	2	8	2	8	2	8	8	2	8	1	8	2	8	2	8	8	8	8	1	1	1
2015.01.07	A887924901	A8879249	2012	1	1	2	A887	1	57	#NULL!	4	4	3	2	1615.63	2223.6	1961.11	4227.28	2416.96	2332.31	5456.2	2461.03	3866.56	5156.62	501	1	2	8	2	8	2	8	2	8	8	2	8	1	8	2	8	2	8	8	8	8	1	1	1
2015.01.07	A887924902	A8879249	2012	1	1	2	A887	2	55	#NULL!	4	4	3	7	1615.63	1198.03	1327.95	#NULL!	1429.99	1482.34	#NULL!	1615.87	#NULL!	#NULL!	501	1	2	8	2	8	2	8	2	8	8	2	8	1	8	2	8	2	8	8	8	8	1	1	1
2015.01.07	A887924903	A8879249	2012	1	1	2	A887	1	30	#NULL!	4	4	4	2	1615.63	4021.92	#NULL!	8955.58	4530.63	6547.09	#NULL!	#NULL!	10009.1	#NULL!	501	1	2	8	2	8	2	8	8	8	8	2	8	1	8	2	8	2	8	8	8	8	1	1	1
2015.01.07	A887924904	A8879249	2012	1	1	2	A887	1	28	#NULL!	4	4	4	2	1615.63	2841.54	#NULL!	#NULL!	4054.78	6613.3	#NULL!	#NULL!	#NULL!	#NULL!	501	1	2	8	2	8	2	8	8	8	8	2	8	1	8	2	8	2	8	8	8	8	1	1	1
2015.01.07	A887925201	A8879252	2012	1	1	2	A887	1	77	#NULL!	4	4	4	7	1615.63	847.151	1206.24	#NULL!	882.872	1021.96	#NULL!	1454.81	#NULL!	#NULL!	501	1	2	8	2	8	2	8	2	8	8	2	8	3	1	1	2	2	8	8	8	8	1	1	1
2015.01.07	A887925203	A8879252	2012	1	1	2	A887	1	47	#NULL!	4	4	4	2	1615.63	2395.77	3134.43	6181.74	3921.99	5038.78	8763.52	4884.3	6440.95	10653.4	501	1	2	8	2	8	2	8	2	8	8	2	8	1	8	2	8	2	8	8	8	8	1	1	1
2015.01.07	A887925502	A8879255	2012	1	1	2	A887	2	50	#NULL!	4	4	4	7	1615.63	1772.84	3399.73	#NULL!	2894.32	3539.5	#NULL!	4179.09	#NULL!	#NULL!	501	1	2	8	2	8	2	8	2	8	8	2	8	1	8	2	8	2	8	8	8	8	1	1	1
2015.01.07	A887925503	A8879255	2012	1	1	2	A887	1	25	#NULL!	4	4	3	7	1615.63	3788.71	#NULL!	#NULL!	#NULL!	#NULL!	#NULL!	#NULL!	#NULL!	#NULL!	501	1	2	8	2	8	2	8	8	8	8	2	8	1	8	2	8	2	8	8	8	8	1	1	1
2015.01.07	A887925504	A8879255	2012	1	1	2	A887	1	22	#NULL!	4	4	3	7	1615.63	7643.07	#NULL!	11934.1	15069.5	17090.2	#NULL!	#NULL!	13951.7	#NULL!	501	1	2	8	2	8	2	8	8	8	8	2	8	1	8	2	8	2	8	8	8	8	1	1	1
2015.01.07	A887926101	A8879261	2012	1	1	2	A887	1	41	#NULL!	4	4	4	1	1615.63	2653.5	3989.94	#NULL!	3379.4	5898.96	#NULL!	6714.78	#NULL!	#NULL!	501	1	2	8	2	8	2	8	2	8	8	2	8	1	8	2	8	2	8	8	8	8	1	1	1
2015.01.07	A887927302	A8879273	2012	1	1	2	A887	2	70	#NULL!	#NULL!	#NULL!	#NULL!	#NULL!	1615.63	2324.83	2747.68	#NULL!	#NULL!	#NULL!	#NULL!	#NULL!	#NULL!	#NULL!	501	1	2	8	2	8	2	8	2	8	8	2	8	1	8	2	8	2	8	8	8	8	1	1	1
2015.01.07	A887927601	A8879276	2012	1	1	2	A887	1	41	#NULL!	4	4	4	1	1615.63	2653.5	3989.94	#NULL!	3379.4	5898.96	#NULL!	6714.78	#NULL!	#NULL!	501	1	2	8	2	8	2	8	2	8	8	2	8	1	8	2	8	2	8	8	8	8	1	1	1
2015.01.07	A887927602	A8879276	2012	1	1	2	A887	2	39	#NULL!	4	4	4	7	1615.63	1388.37	#NULL!	6061.75	1548.04	2181.35	#NULL!	#NULL!	7397.89	#NULL!	501	1	2	8	2	8	2	8	8	8	8	2	8	1	8	2	8	2	8	8	8	8	1	1	1
2015.01.07	A887927603	A8879276	2012	1	1	2	A887	2	15	#NULL!	4	4	1	7	1615.63	1781.3	#NULL!	#NULL!	2380.8	3695.86	#NULL!	#NULL!	#NULL!	#NULL!	501	1	2	8	2	8	2	8	8	8	8	8	8	1	8	2	8	2	8	8	8	8	1	1	1
2015.01.07	A887927604	A8879276	2012	1	1	2	A887	1	7	#NULL!	4	4	1	#NULL!	1615.63	1384.07	#NULL!	#NULL!	1074.25	1635.24	#NULL!	#NULL!	#NULL!	#NULL!	501	1	2	8	2	8	2	8	8	8	8	8	8	8	8	8	8	2	8	8	8	8	1	1	1
2015.01.07	A887929701	A8879297	2012	1	1	2	A887	1	58	#NULL!	4	4	3	2	1615.63	2223.6	1961.11	2113.64	2416.96	2332.31	2728.1	2461.03	1933.28	2578.31	501	1	2	8	2	8	2	8	2	8	8	2	8	1	8	2	8	2	8	8	8	8	1	1	1
2015.01.07	A887929702	A8879297	2012	1	1	2	A887	2	54	#NULL!	4	4	4	7	1615.63	1329.63	1699.87	2556.77	1447.16	1769.75	3731.36	2089.55	2444.32	3825.36	501	1	2	8	2	8	2	8	2	8	8	2	8	1	8	2	8	2	8	8	8	8	1	1	1
2015.01.07	A887930001	A8879300	2012	1	1	2	A887	1	58	#NULL!	4	4	4	1	1615.63	2223.6	1961.11	#NULL!	2416.96	2332.31	#NULL!	2461.03	#NULL!	#NULL!	501	1	2	8	2	8	2	8	2	8	8	2	8	1	8	2	8	2	8	8	8	8	1	1	1
2015.01.07	A887930002	A8879300	2012	1	1	2	A887	2	54	#NULL!	4	4	#NULL!	#NULL!	1615.63	1329.63	1699.87	#NULL!	1447.16	1769.75	#NULL!	2089.55	#NULL!	#NULL!	501	1	2	8	2	8	2	8	2	8	8	2	8	1	8	2	8	2	8	8	8	8	1	1	1
2015.01.07	A887930003	A8879300	2012	1	1	2	A887	1	28	#NULL!	4	4	4	7	1615.63	2841.54	#NULL!	4850.21	4054.78	6613.3	#NULL!	#NULL!	5997.95	#NULL!	501	1	2	8	2	8	2	8	8	8	8	2	8	1	8	2	8	2	8	8	8	8	1	1	1
2015.01.07	A887930004	A8879300	2012	1	1	2	A887	2	25	#NULL!	4	4	3	7	1615.63	1872.73	#NULL!	4627.94	2175.49	2920.6	#NULL!	#NULL!	4606.82	#NULL!	501	1	2	8	2	8	2	8	8	8	8	2	8	1	8	2	8	2	8	8	8	8	1	1	1
2015.01.07	A887930601	A8879306	2012	1	1	2	A887	1	74	#NULL!	2	2	3	7	1615.63	817.966	1206.24	#NULL!	902.309	1021.96	#NULL!	1454.81	#NULL!	#NULL!	501	1	2	8	2	8	2	8	2	8	8	2	8	1	8	2	8	2	8	8	8	8	1	1	1
2015.01.07	A887930602	A8879306	2012	1	1	2	A887	2	60	#NULL!	2	2	3	7	1615.63	1222.06	1080.88	#NULL!	1265.2	1120.3	#NULL!	1276.15	#NULL!	#NULL!	501	1	2	8	2	8	2	8	2	8	8	2	8	1	8	2	8	2	8	8	8	8	1	1	1
2015.01.07	A887931801	A8879318	2012	1	1	2	A887	1	42	#NULL!	4	4	4	1	1615.63	2653.5	7979.87	3537.44	3379.4	5898.96	11039.4	13429.6	4540.74	15443.4	501	1	2	8	2	8	2	8	2	8	8	2	8	1	8	2	8	2	8	8	8	8	1	1	1
2015.01.07	A887931802	A8879318	2012	1	1	2	A887	2	40	#NULL!	4	4	4	7	1615.63	1308.56	#NULL!	3051.98	1447.57	2151.75	#NULL!	#NULL!	2506.62	#NULL!	501	1	2	8	2	8	2	8	2	8	8	2	8	1	8	2	8	2	8	8	8	8	1	1	1
2015.01.07	A887931803	A8879318	2012	1	1	2	A887	1	7	#NULL!	4	4	1	#NULL!	1615.63	1384.07	#NULL!	#NULL!	1074.25	1635.24	#NULL!	#NULL!	#NULL!	#NULL!	501	1	2	8	2	8	2	8	8	8	8	8	8	8	8	8	8	2	8	8	8	8	1	1	1
2015.01.07	A887931804	A8879318	2012	1	1	2	A887	1	5	62	4	4	1	#NULL!	1615.63	1384.07	#NULL!	#NULL!	1074.25	1635.24	#NULL!	#NULL!	#NULL!	#NULL!	501	1	2	8	2	8	2	8	8	8	8	8	8	8	8	8	8	8	8	8	8	8	8	8	8
2015.01.07	A887932101	A8879321	2012	1	1	2	A887	2	53	#NULL!	4	4	4	7	1615.63	1994.45	1699.87	7670.3	4341.49	5309.25	3731.36	2089.55	7332.97	3825.36	501	1	2	8	2	8	2	8	2	8	8	2	8	1	8	2	8	2	8	8	8	8	1	1	1
2015.01.07	A887932103	A8879321	2012	1	1	2	A887	2	28	#NULL!	4	4	4	7	1615.63	2809.1	#NULL!	#NULL!	#NULL!	#NULL!	#NULL!	#NULL!	#NULL!	#NULL!	501	1	2	8	2	8	2	8	8	8	8	2	8	1	8	2	8	2	8	8	8	8	1	1	1
2015.01.07	A887932401	A8879324	2012	1	1	2	A887	1	75	#NULL!	1	1	4	7	1615.63	847.151	#NULL!	#NULL!	882.872	1021.96	#NULL!	#NULL!	#NULL!	#NULL!	501	1	2	8	2	8	2	8	2	8	8	2	8	1	8	2	8	2	8	8	8	8	1	1	1
2015.01.07	A887932402	A8879324	2012	1	1	2	A887	2	75	#NULL!	1	1	3	7	1615.63	1125.06	#NULL!	#NULL!	1071.62	1103.96	#NULL!	#NULL!	#NULL!	#NULL!	501	1	2	8	2	8	2	8	2	8	8	2	8	1	8	2	8	2	8	8	8	8	1	1	1
2015.01.07	A888896401	A8888964	2012	1	1	2	A888	1	32	#NULL!	3	3	#NULL!	#NULL!	3296.17	8205.45	#NULL!	9643.04	#NULL!	#NULL!	#NULL!	#NULL!	#NULL!	#NULL!	501	1	2	8	2	8	2	8	8	8	8	2	8	1	8	2	8	2	8	8	8	8	1	1	1
2015.01.07	A888896402	A8888964	2012	1	1	2	A888	2	29	#NULL!	2	3	4	1	3296.17	3820.71	#NULL!	4983.2	7890.47	7061.98	#NULL!	#NULL!	10822.8	#NULL!	501	1	2	8	1	2	2	8	8	8	8	2	8	1	8	2	8	1	2	1	1	1	1	1	1
2015.01.07	A888896403	A8888964	2012	1	1	2	A888	2	5	60	3	3	1	#NULL!	3296.17	3336.79	#NULL!	#NULL!	3189.65	5071.49	#NULL!	#NULL!	#NULL!	#NULL!	501	1	2	8	2	8	2	8	8	8	8	8	8	8	8	8	8	8	8	8	8	8	8	8	8
2015.01.07	A888896404	A8888964	2012	1	1	2	A888	1	2	30	3	3	1	#NULL!	3296.17	2317.02	#NULL!	#NULL!	2381.53	3767.42	#NULL!	#NULL!	#NULL!	#NULL!	501	1	8	8	8	8	8	8	8	8	8	8	8	8	8	8	8	8	8	8	8	8	8	8	8
2015.01.07	A888898501	A8888985	2012	1	1	2	A888	1	33	#NULL!	4	4	4	2	3296.17	8205.45	#NULL!	14464.6	8216.26	11873.1	#NULL!	#NULL!	17635.9	#NULL!	501	1	2	8	2	8	2	8	8	8	8	2	8	1	8	2	8	1	2	1	1	2	1	1	1
2015.01.07	A888898502	A8888985	2012	1	1	2	A888	2	34	#NULL!	4	4	4	2	3296.17	4066.56	#NULL!	10135.8	3750.08	4596.14	#NULL!	#NULL!	10378.5	#NULL!	501	1	2	8	2	8	2	8	8	8	8	2	8	1	8	2	8	1	1	2	1	1	1	1	1
2015.01.07	A888898503	A8888985	2012	1	1	2	A888	1	1	13	4	4	1	#NULL!	3296.17	2317.02	#NULL!	#NULL!	2381.53	2825.56	#NULL!	#NULL!	#NULL!	#NULL!	501	1	8	8	8	8	8	8	8	8	8	8	8	8	8	8	8	8	8	8	8	8	8	8	8
2015.01.07	A888898504	A8888985	2012	1	1	2	A888	2	66	#NULL!	4	4	1	7	3296.17	1595.87	1774.21	#NULL!	1650.35	1701.56	#NULL!	1803.85	#NULL!	#NULL!	501	1	2	8	2	8	2	8	1	2	2	2	8	2	3	2	8	2	8	8	8	8	1	1	1
2015.01.07	A888901201	A8889012	2012	1	1	2	A888	1	73	#NULL!	1	1	2	7	3296.17	1668.8	2355.21	#NULL!	1636.33	1853.32	#NULL!	2506.37	#NULL!	#NULL!	501	1	2	8	2	8	2	8	2	8	8	2	8	1	8	1	1	1	1	1	1	2	1	1	1
2015.01.07	A888901202	A8889012	2012	1	1	2	A888	2	69	#NULL!	1	1	1	7	3296.17	1595.87	1774.21	#NULL!	1650.35	1701.56	#NULL!	1803.85	#NULL!	#NULL!	501	1	2	8	2	8	2	8	1	3	2	2	8	1	8	2	8	1	1	1	1	2	1	1	1
2015.01.07	A888902101	A8889021	2012	1	1	2	A888	2	60	#NULL!	3	3	3	7	3296.17	2493.22	2110.46	4284.47	2294.43	2031.66	4773.06	2198.57	4396.72	4637.7	501	1	2	8	2	8	2	8	2	8	8	2	8	1	8	2	8	2	8	8	8	8	1	1	1
2015.01.07	A888902102	A8889021	2012	1	1	2	A888	1	4	57	3	3	1	#NULL!	3296.17	2317.02	#NULL!	#NULL!	2381.53	2825.56	#NULL!	#NULL!	#NULL!	#NULL!	501	1	2	8	2	8	2	8	8	8	8	8	8	8	8	8	8	8	8	8	8	8	8	8	8
2015.01.07	A888904201	A8889042	2012	1	1	2	A888	1	66	#NULL!	3	3	2	5	3296.17	3209.65	2362.05	9370.32	3397.68	3300.07	8361.14	2426.93	9441.18	8205.67	501	1	2	8	2	8	2	8	1	2	2	2	8	1	8	1	2	1	1	1	1	2	1	1	1
2015.01.07	A888904202	A8889042	2012	1	1	2	A888	2	61	#NULL!	3	3	2	5	3296.17	3739.83	2110.46	#NULL!	3441.64	3047.49	#NULL!	2198.57	#NULL!	#NULL!	501	1	2	8	1	2	2	8	1	3	2	2	8	1	8	1	1	1	1	2	1	2	1	1	1
2015.01.07	A888906301	A8889063	2012	1	1	2	A888	1	61	#NULL!	1	2	3	3	3296.17	3388.11	2625.59	#NULL!	#NULL!	#NULL!	#NULL!	#NULL!	#NULL!	#NULL!	501	1	2	8	2	8	2	8	2	8	8	2	8	1	8	2	8	2	8	8	8	8	1	1	1
2015.01.07	A888906302	A8889063	2012	1	1	2	A888	2	56	#NULL!	1	2	3	7	3296.17	2444.2	2592.86	#NULL!	3457.7	3584.28	#NULL!	4175.78	#NULL!	#NULL!	501	1	2	8	1	2	2	8	2	8	8	2	8	1	8	1	1	1	1	1	1	2	1	1	1
2015.01.07	A888906303	A8889063	2012	1	1	2	A888	1	27	#NULL!	1	2	4	1	3296.17	5797.25	#NULL!	20890.1	9804.42	15990.9	#NULL!	#NULL!	28182	#NULL!	501	1	1	2	1	2	2	8	8	8	8	2	8	1	8	2	8	1	1	1	1	1	1	1	1
2015.01.07	A888906304	A8889063	2012	1	1	2	A888	2	83	#NULL!	3	2	1	6	3296.17	2295.33	2682.46	#NULL!	2591.17	2669.36	#NULL!	4062.18	#NULL!	#NULL!	501	1	2	8	2	8	2	8	2	8	8	2	8	1	8	1	1	2	8	8	8	8	1	1	1
2015.01.07	A888910201	A8889102	2012	1	1	2	A888	1	81	#NULL!	2	1	3	7	3296.17	1728.34	2355.21	#NULL!	1601.08	1853.32	#NULL!	2506.37	#NULL!	#NULL!	501	1	2	8	2	8	2	8	2	8	8	2	8	1	8	2	8	2	8	8	8	8	1	1	1
2015.01.07	A888910202	A8889102	2012	1	1	2	A888	2	77	#NULL!	2	1	1	7	3296.17	2295.33	2682.46	#NULL!	1943.38	2002.02	#NULL!	2708.12	#NULL!	#NULL!	501	1	2	8	2	8	2	8	1	3	2	2	8	1	8	1	1	2	8	8	8	8	1	1	1
2015.01.07	A888911402	A8889114	2012	1	1	2	A888	2	30	#NULL!	3	3	4	7	3296.17	8133.13	#NULL!	#NULL!	7500.16	9192.28	#NULL!	#NULL!	#NULL!	#NULL!	501	1	2	8	2	8	2	8	8	8	8	2	8	1	8	2	8	2	8	8	8	8	1	1	1
2015.01.07	A888912601	A8889126	2012	1	1	2	A888	1	47	#NULL!	2	3	3	2	3296.17	4887.81	6120.07	#NULL!	7112.52	9137.8	#NULL!	8414.77	#NULL!	#NULL!	501	1	2	8	2	8	2	8	2	8	8	2	8	1	8	1	1	2	8	8	8	8	1	1	1
2015.01.07	A888912602	A8889126	2012	1	1	2	A888	2	50	#NULL!	2	3	3	7	3296.17	2712.69	3319.04	#NULL!	2624.42	3209.43	#NULL!	3599.91	#NULL!	#NULL!	501	1	2	8	1	2	2	8	1	2	2	2	8	1	8	1	1	2	8	8	8	8	1	1	1
2015.01.07	A888912603	A8889126	2012	1	1	2	A888	2	19	#NULL!	2	3	3	2	3296.17	4037.98	#NULL!	17717.7	4317.56	6702.43	#NULL!	#NULL!	11099.5	#NULL!	501	1	2	8	2	8	2	8	8	8	8	2	8	1	8	1	2	1	1	1	1	1	1	1	1
2015.01.07	A888912604	A8889126	2012	1	1	2	A888	2	22	#NULL!	2	3	3	7	3296.17	3547.05	#NULL!	10907.7	3435.75	5530.53	#NULL!	#NULL!	11025.9	#NULL!	501	1	2	8	2	8	2	8	8	8	8	2	8	1	8	2	8	2	8	8	8	8	1	1	1
2015.01.07	A888914701	A8889147	2012	1	1	2	A888	1	56	#NULL!	2	3	4	7	3296.17	6804.83	3829.13	#NULL!	6574.73	6344.44	#NULL!	4239.92	#NULL!	#NULL!	501	1	2	8	2	8	1	2	2	8	8	2	8	2	3	2	8	2	8	8	8	8	1	1	1
2015.01.07	A888914702	A8889147	2012	1	1	2	A888	2	52	#NULL!	2	3	4	7	3296.17	4069.03	3319.04	#NULL!	3936.63	4814.15	#NULL!	3599.91	#NULL!	#NULL!	501	1	2	8	2	8	2	8	1	2	2	2	8	1	8	2	8	2	8	8	8	8	1	1	1
2015.01.07	A888917101	A8889171	2012	1	1	2	A888	1	37	#NULL!	3	4	4	2	3296.17	4357.73	#NULL!	#NULL!	4262.5	7126.11	#NULL!	#NULL!	#NULL!	#NULL!	501	1	2	8	2	8	2	8	8	8	8	2	8	1	8	2	8	2	8	8	8	8	1	1	1
2015.01.07	A888917102	A8889171	2012	1	1	2	A888	2	35	#NULL!	3	4	4	7	3296.17	2832.53	#NULL!	#NULL!	2807.36	3955.87	#NULL!	#NULL!	#NULL!	#NULL!	501	1	1	2	2	8	2	8	8	8	8	2	8	1	8	2	8	1	2	1	2	2	2	2	1
2015.01.07	A888917103	A8889171	2012	1	1	2	A888	1	8	#NULL!	4	4	1	#NULL!	3296.17	2235.47	#NULL!	#NULL!	2313.42	2965.5	#NULL!	#NULL!	#NULL!	#NULL!	501	1	2	8	1	2	2	8	8	8	8	8	8	8	8	8	8	1	1	1	1	2	1	1	1
2015.01.07	A888917104	A8889171	2012	1	1	2	A888	1	5	64	4	4	1	#NULL!	3296.17	2235.47	#NULL!	#NULL!	2313.42	2965.5	#NULL!	#NULL!	#NULL!	#NULL!	501	1	2	8	2	8	2	8	8	8	8	8	8	8	8	8	8	8	8	8	8	8	8	8	8
2015.01.07	A888918001	A8889180	2012	1	1	2	A888	1	60	#NULL!	4	4	1	5	3296.17	3388.11	2625.59	5823.62	3987.45	2669.3	7910.42	2929.24	5912.41	8011.27	501	1	2	8	2	8	2	8	2	8	8	2	8	1	8	2	8	2	8	8	8	8	1	1	1
2015.01.07	A888918002	A8889180	2012	1	1	2	A888	2	54	#NULL!	4	4	2	6	3296.17	2712.69	3319.04	#NULL!	2624.42	3209.43	#NULL!	3599.91	#NULL!	#NULL!	501	1	2	8	2	8	2	8	2	8	8	2	8	1	8	2	8	2	8	8	8	8	1	1	1
2015.01.07	A888918003	A8889180	2012	1	1	2	A888	1	29	#NULL!	4	4	4	1	3296.17	5797.25	#NULL!	8704.21	7353.32	11993.2	#NULL!	#NULL!	11742.5	#NULL!	501	1	2	8	2	8	2	8	8	8	8	2	8	1	8	2	8	2	8	8	8	8	1	1	1
2015.01.07	A888918004	A8889180	2012	1	1	2	A888	2	28	#NULL!	4	4	4	7	3296.17	3820.71	#NULL!	#NULL!	3945.23	5296.49	#NULL!	#NULL!	#NULL!	#NULL!	501	1	2	8	2	8	2	8	8	8	8	2	8	1	8	3	8	1	2	1	1	2	1	1	1
2015.01.07	A888918005	A8889180	2012	1	1	2	A888	2	27	#NULL!	4	4	4	1	3296.17	3820.71	#NULL!	8305.33	3945.23	5296.49	#NULL!	#NULL!	9019.01	#NULL!	501	1	2	8	2	8	2	8	8	8	8	2	8	1	8	2	8	2	8	8	8	8	1	1	1
2015.01.07	A888918006	A8889180	2012	1	1	2	A888	1	1	17	4	4	1	#NULL!	3296.17	2317.02	#NULL!	#NULL!	2381.53	2825.56	#NULL!	#NULL!	#NULL!	#NULL!	501	1	8	8	8	8	8	8	8	8	8	8	8	8	8	8	8	8	8	8	8	8	8	8	8
2015.01.07	A888921001	A8889210	2012	1	1	2	A888	1	59	#NULL!	2	2	2	5	3296.17	6804.83	7658.26	#NULL!	#NULL!	#NULL!	#NULL!	#NULL!	#NULL!	#NULL!	501	1	2	8	2	8	2	8	2	8	8	2	8	1	8	1	1	2	8	8	8	8	1	1	1
2015.01.07	A888921002	A8889210	2012	1	1	2	A888	2	51	#NULL!	1	2	1	7	3296.17	4069.03	#NULL!	#NULL!	7873.26	9628.3	#NULL!	#NULL!	#NULL!	#NULL!	501	1	2	8	2	8	2	8	1	3	2	2	8	1	8	1	2	2	8	8	8	8	1	1	1
2015.01.07	A888922201	A8889222	2012	1	1	2	A888	1	52	#NULL!	3	4	3	1	3296.17	6318.06	5560.57	#NULL!	5983.42	6722	#NULL!	6861.63	#NULL!	#NULL!	501	1	2	8	2	8	2	8	2	8	8	2	8	1	8	2	8	2	8	8	8	8	1	1	1
2015.01.07	A888922202	A8889222	2012	1	1	2	A888	2	47	#NULL!	3	4	3	1	3296.17	4303.14	4592.51	13746.2	4056.01	4503.96	16340.5	4731.81	12533.5	16327.3	501	1	2	8	1	1	2	8	1	2	2	2	8	1	8	2	8	1	1	2	1	2	1	1	1
2015.01.07	A888922203	A8889222	2012	1	1	2	A888	1	22	#NULL!	4	4	3	3	3296.17	11694.9	#NULL!	12850.2	13664.2	15496.5	#NULL!	#NULL!	16388.3	#NULL!	501	1	2	8	2	8	1	2	8	8	8	2	8	1	8	1	1	2	8	8	8	8	1	1	1
2015.01.07	A888922204	A8889222	2012	1	1	2	A888	2	20	#NULL!	3	4	3	1	3296.17	3547.05	#NULL!	#NULL!	3435.75	5530.53	#NULL!	#NULL!	#NULL!	#NULL!	501	1	2	8	2	8	2	8	8	8	8	2	8	1	8	2	8	1	2	1	1	1	1	1	1
2015.01.07	A888924301	A8889243	2012	1	1	2	A888	1	44	#NULL!	4	4	4	5	3296.17	5413.62	7790.47	15235.9	6128.52	10697.7	9509.43	11568.4	21335.1	13303.1	501	1	2	8	2	8	2	8	2	8	8	2	8	1	8	2	8	2	8	8	8	8	1	1	1
2015.01.07	A888924302	A8889243	2012	1	1	2	A888	2	38	#NULL!	4	4	4	1	3296.17	2832.53	#NULL!	#NULL!	2807.36	3955.87	#NULL!	#NULL!	#NULL!	#NULL!	501	1	2	8	2	8	2	8	8	8	8	1	1	1	8	1	1	2	8	8	8	8	1	1	1
2015.01.07	A888924303	A8889243	2012	1	1	2	A888	1	5	67	4	4	1	#NULL!	3296.17	2235.47	#NULL!	#NULL!	2313.42	2965.5	#NULL!	#NULL!	#NULL!	#NULL!	501	1	2	8	1	2	2	8	8	8	8	8	8	8	8	8	8	8	8	8	8	8	8	8	8
2015.01.07	A888926403	A8889264	2012	1	1	2	A888	1	1	19	4	4	1	#NULL!	3296.17	2317.02	#NULL!	#NULL!	2381.53	4238.35	#NULL!	#NULL!	#NULL!	#NULL!	501	1	8	8	8	8	8	8	8	8	8	8	8	8	8	8	8	8	8	8	8	8	8	8	8
2015.01.07	A888927601	A8889276	2012	1	1	2	A888	1	60	#NULL!	2	3	2	7	3296.17	4517.48	2625.59	#NULL!	5316.6	3559.06	#NULL!	2929.24	#NULL!	#NULL!	501	1	2	8	2	8	2	8	2	8	8	2	8	1	8	1	1	1	1	1	1	2	1	1	1
2015.01.07	A888927602	A8889276	2012	1	1	2	A888	2	53	#NULL!	2	3	2	7	3296.17	3616.92	3319.04	11012.1	3499.23	4279.24	12856.9	3599.91	11484.9	13180.8	501	1	2	8	2	8	2	8	1	2	2	2	8	1	8	2	8	1	2	1	1	2	1	1	1
2015.01.07	A888927603	A8889276	2012	1	1	2	A888	2	30	#NULL!	2	3	4	1	3296.17	5422.09	#NULL!	13514.4	5000.1	6128.19	#NULL!	#NULL!	13838	#NULL!	501	1	2	8	1	2	2	8	8	8	8	2	8	1	8	2	8	1	1	2	2	1	1	1	1
2015.01.07	A888929701	A8889297	2012	1	1	2	A888	1	69	#NULL!	1	1	1	7	3296.17	2139.76	2362.05	#NULL!	2265.12	2200.05	#NULL!	2426.93	#NULL!	#NULL!	501	1	2	8	1	1	2	8	2	8	8	2	8	1	8	1	2	1	2	1	1	2	1	1	1
2015.01.07	A888929702	A8889297	2012	1	1	2	A888	2	64	#NULL!	1	1	1	6	3296.17	2493.22	2110.46	#NULL!	2294.43	2031.66	#NULL!	2198.57	#NULL!	#NULL!	501	1	2	8	2	8	1	2	1	2	2	2	8	1	8	2	8	2	8	8	8	8	1	1	1
2015.01.07	A888930901	A8889309	2012	1	1	2	A888	1	47	#NULL!	4	4	4	1	3296.17	4887.81	6120.07	13312.5	7112.52	9137.8	15098	8414.77	11348.8	18353.9	501	1	2	8	2	8	2	8	2	8	8	2	8	1	8	2	8	1	2	1	1	2	1	1	1
2015.01.07	A888930902	A8889309	2012	1	1	2	A888	2	42	#NULL!	4	4	3	2	3296.17	2669.69	4061.2	#NULL!	2625.15	3902.18	#NULL!	3964.43	#NULL!	#NULL!	501	1	2	8	1	2	2	8	1	2	2	2	8	1	8	2	8	1	1	2	1	2	1	1	1
2015.01.07	A888930903	A8889309	2012	1	1	2	A888	1	16	#NULL!	4	4	2	7	3296.17	5306.66	#NULL!	4848.77	4586.12	6775.79	#NULL!	#NULL!	10058.8	#NULL!	501	1	2	8	2	8	2	8	8	8	8	8	8	1	8	1	1	1	2	2	1	1	2	1	1
2015.01.07	A889912301	A8899123	2012	1	1	2	A889	1	34	#NULL!	2	3	4	3	2056.87	10240.7	#NULL!	#NULL!	5810.73	24829.6	#NULL!	#NULL!	#NULL!	#NULL!	501	1	2	8	1	2	2	8	8	8	8	1	1	1	8	2	8	1	1	2	1	1	1	1	1
2015.01.07	A889913501	A8899135	2012	1	1	2	A889	1	89	#NULL!	3	2	3	7	2056.87	1078.52	#NULL!	#NULL!	1132.32	1310.71	#NULL!	#NULL!	#NULL!	#NULL!	501	1	2	8	2	8	2	8	2	8	8	2	8	3	3	2	8	2	8	8	8	8	1	1	1
2015.01.07	A889913502	A8899135	2012	1	1	2	A889	2	81	#NULL!	3	2	3	7	2056.87	1432.33	6552.46	#NULL!	1374.4	1415.88	#NULL!	7408.96	#NULL!	#NULL!	501	1	2	8	1	2	2	8	2	8	8	2	8	1	8	2	8	1	1	2	1	2	1	2	1
2015.01.07	A889914401	A8899144	2012	1	1	2	A889	1	67	#NULL!	2	2	1	2	2056.87	2670.51	#NULL!	#NULL!	3203.89	3111.84	#NULL!	#NULL!	#NULL!	#NULL!	501	1	2	8	2	8	2	8	2	8	8	2	8	2	3	2	8	2	8	8	8	8	1	1	1
2015.01.07	A889915301	A8899153	2012	1	1	2	A889	1	70	#NULL!	4	3	#NULL!	#NULL!	2056.87	1562.05	#NULL!	#NULL!	1735.88	3932.12	#NULL!	#NULL!	#NULL!	#NULL!	501	1	2	8	2	8	2	8	1	3	2	1	1	1	8	2	8	2	8	8	8	8	1	1	1
2015.01.07	A889915303	A8899153	2012	1	1	2	A889	1	30	#NULL!	3	3	3	1	2056.87	7680.54	#NULL!	19741.4	#NULL!	#NULL!	#NULL!	#NULL!	#NULL!	#NULL!	501	1	1	2	2	8	2	8	8	8	8	2	8	1	8	2	8	2	8	8	8	8	1	2	1
2015.01.07	A889917101	A8899171	2012	1	1	2	A889	1	39	#NULL!	1	2	4	2	2056.87	2719.31	#NULL!	9129.02	3014.53	5039.74	#NULL!	#NULL!	12596.8	#NULL!	501	1	1	2	2	8	2	8	8	8	8	2	8	1	8	1	1	2	8	8	8	8	2	2	1
2015.01.07	A889917102	A8899171	2012	1	1	2	A889	2	33	#NULL!	1	2	3	7	2056.87	2537.62	#NULL!	#NULL!	2652.14	3250.49	#NULL!	#NULL!	#NULL!	#NULL!	501	1	2	8	1	1	2	8	8	8	8	2	8	1	8	1	2	1	2	2	1	1	1	1	1
2015.01.07	A889917103	A8899171	2012	1	1	2	A889	1	9	#NULL!	1	2	1	#NULL!	2056.87	1456.16	#NULL!	#NULL!	1506.94	2097.27	#NULL!	#NULL!	#NULL!	#NULL!	501	1	2	8	2	8	2	8	8	8	8	8	8	8	8	8	8	1	2	2	1	1	1	1	1
2015.01.07	A889917104	A8899171	2012	1	1	2	A889	2	4	55	2	2	1	#NULL!	2056.87	2324.22	#NULL!	#NULL!	2114.72	2675.2	#NULL!	#NULL!	#NULL!	#NULL!	501	1	2	8	2	8	2	8	8	8	8	8	8	8	8	8	8	8	8	8	8	8	8	8	8
2015.01.07	A889918002	A8899180	2012	1	1	2	A889	2	40	#NULL!	3	4	3	3	2056.87	3331.88	#NULL!	8970.28	3713.14	5519.42	#NULL!	#NULL!	10333.4	#NULL!	501	1	2	8	2	8	2	8	2	8	8	2	8	1	8	2	8	2	8	8	8	8	1	1	1
2015.01.07	A889918004	A8899180	2012	1	1	2	A889	1	1	16	4	4	1	#NULL!	2056.87	3018.56	#NULL!	#NULL!	1329.69	3996.6	#NULL!	#NULL!	#NULL!	#NULL!	501	1	8	8	8	8	8	8	8	8	8	8	8	8	8	8	8	8	8	8	8	8	8	8	8
2015.01.07	A889918901	A8899189	2012	1	1	2	A889	1	39	#NULL!	2	3	4	2	2056.87	2719.31	#NULL!	#NULL!	3014.53	5039.74	#NULL!	#NULL!	#NULL!	#NULL!	501	1	2	8	2	8	2	8	8	8	8	2	8	1	8	1	1	2	8	8	8	8	1	1	1
2015.01.07	A889918902	A8899189	2012	1	1	2	A889	2	39	#NULL!	2	3	4	7	2056.87	1767.56	#NULL!	8908.24	1985.42	2797.68	#NULL!	#NULL!	10165.8	#NULL!	501	1	2	8	2	8	2	8	8	8	8	2	8	1	8	1	2	2	8	8	8	8	1	1	1
2015.01.07	A889918903	A8899189	2012	1	1	2	A889	2	13	#NULL!	3	3	1	#NULL!	2056.87	1420.14	#NULL!	#NULL!	1611.17	2394.28	#NULL!	#NULL!	#NULL!	#NULL!	501	1	2	8	1	2	2	8	8	8	8	8	8	1	8	1	2	2	8	8	8	8	2	2	1
2015.01.07	A889918904	A8899189	2012	1	1	2	A889	1	11	#NULL!	3	3	1	#NULL!	2056.87	1530.03	#NULL!	6530.64	1557.32	2687.96	#NULL!	#NULL!	6824.33	#NULL!	501	1	2	8	2	8	2	8	8	8	8	8	8	8	8	8	8	2	8	8	8	8	1	1	1
2015.01.07	A889918905	A8899189	2012	1	1	2	A889	2	6	80	3	3	1	#NULL!	2056.87	2173.55	#NULL!	#NULL!	2077.7	2690.01	#NULL!	#NULL!	#NULL!	#NULL!	501	1	2	8	2	8	1	2	8	8	8	8	8	8	8	8	8	2	8	8	8	8	1	1	1
2015.01.07	A889919801	A8899198	2012	1	1	2	A889	1	26	#NULL!	1	2	3	7	2056.87	3617.6	#NULL!	7127.78	5200.43	8481.84	#NULL!	#NULL!	12363.2	#NULL!	501	1	2	8	2	8	2	8	8	8	8	2	8	1	8	2	8	1	2	1	1	2	1	1	1
2015.01.07	A889919802	A8899198	2012	1	1	2	A889	2	22	#NULL!	1	2	3	7	2056.87	2213.43	#NULL!	#NULL!	2429.84	3911.31	#NULL!	#NULL!	#NULL!	#NULL!	501	1	1	2	2	8	2	8	8	8	8	2	8	1	8	2	8	2	8	8	8	8	1	1	1
2015.01.07	A889920703	A8899207	2012	1	1	2	A889	1	10	#NULL!	1	2	1	#NULL!	2056.87	1530.03	#NULL!	3265.32	#NULL!	#NULL!	#NULL!	#NULL!	#NULL!	#NULL!	501	1	2	8	1	2	2	8	8	8	8	8	8	8	8	8	8	1	1	2	1	2	1	1	1
2015.01.07	A889921601	A8899216	2012	1	1	2	A889	2	75	#NULL!	3	2	1	7	2056.87	1432.33	3276.23	#NULL!	1374.4	1415.88	#NULL!	3704.48	#NULL!	#NULL!	501	1	1	2	2	8	2	8	2	8	8	2	8	1	8	2	8	2	8	8	8	8	1	2	1
2015.01.07	A889921602	A8899216	2012	1	1	2	A889	1	75	#NULL!	3	2	1	7	2056.87	1078.52	2876.55	#NULL!	1132.32	1310.71	#NULL!	3428.51	#NULL!	#NULL!	501	1	2	8	2	8	2	8	1	3	2	1	1	1	8	2	8	2	8	8	8	8	1	1	1
2015.01.07	A889923401	A8899234	2012	1	1	2	A889	2	50	#NULL!	2	3	4	7	2056.87	1692.77	4053.72	#NULL!	1856.05	2269.78	#NULL!	4924.38	#NULL!	#NULL!	501	1	2	8	2	8	2	8	2	8	8	2	8	2	3	2	8	2	8	8	8	8	1	1	1
2015.01.07	A889923402	A8899234	2012	1	1	2	A889	1	59	#NULL!	2	3	4	1	2056.87	2830.9	4676.72	#NULL!	3099.86	2991.28	#NULL!	5799.85	#NULL!	#NULL!	501	1	2	8	2	8	2	8	2	8	8	2	8	2	3	2	8	2	8	8	8	8	1	1	1
2015.01.07	A889924001	A8899240	2012	1	1	2	A889	1	60	#NULL!	3	3	3	7	2056.87	3171.37	3206.78	#NULL!	4230.02	2831.68	#NULL!	4006.96	#NULL!	#NULL!	501	1	2	8	1	1	2	8	2	8	8	2	8	1	8	2	8	1	1	2	1	1	1	1	1
2015.01.07	A889924002	A8899240	2012	1	1	2	A889	2	60	#NULL!	3	3	4	1	2056.87	2333.73	2577.61	8771.25	2434	2155.25	10881.9	3007.46	11572.8	15860	501	1	2	8	2	8	2	8	2	8	8	2	8	1	8	2	8	1	1	1	2	2	1	1	1
2015.01.07	A889925501	A8899255	2012	1	1	2	A889	1	67	#NULL!	4	4	4	7	2056.87	1335.25	2884.9	6394.37	1601.94	1555.92	9531.12	3319.83	8283.51	14030.8	501	1	2	8	1	2	2	8	2	8	8	2	8	1	8	2	8	1	1	2	2	1	1	1	1
2015.01.07	A889925502	A8899255	2012	1	1	2	A889	2	62	#NULL!	4	4	3	7	2056.87	1555.82	2577.61	#NULL!	1622.67	1436.83	#NULL!	3007.46	#NULL!	#NULL!	501	1	2	8	2	8	2	8	2	8	8	2	8	1	8	1	2	2	8	8	8	8	1	1	1
2015.01.07	A889925503	A8899255	2012	1	1	2	A889	1	36	#NULL!	4	4	3	3	2056.87	2719.31	#NULL!	#NULL!	3014.53	5039.74	#NULL!	#NULL!	#NULL!	#NULL!	501	1	2	8	1	2	2	8	8	8	8	2	8	1	8	2	8	1	1	2	1	1	1	1	1
2015.01.07	A889926401	A8899264	2012	1	1	2	A889	1	36	#NULL!	#NULL!	#NULL!	#NULL!	#NULL!	2056.87	2719.31	#NULL!	#NULL!	#NULL!	#NULL!	#NULL!	#NULL!	#NULL!	#NULL!	501	1	2	8	1	2	2	8	8	8	8	2	8	1	8	2	8	2	8	8	8	8	1	1	1
2015.01.07	A889926402	A8899264	2012	1	1	2	A889	2	32	#NULL!	#NULL!	#NULL!	#NULL!	#NULL!	2056.87	2537.62	#NULL!	#NULL!	5304.28	4875.74	#NULL!	#NULL!	#NULL!	#NULL!	501	1	1	2	2	8	1	2	8	8	8	2	8	1	8	2	8	2	8	8	8	8	1	2	1
2015.01.07	A889926403	A8899264	2012	1	1	2	A889	1	4	49	#NULL!	#NULL!	#NULL!	#NULL!	2056.87	1509.28	#NULL!	#NULL!	1551.3	2997.45	#NULL!	#NULL!	#NULL!	#NULL!	501	1	2	8	2	8	2	8	8	8	8	8	8	8	8	8	8	8	8	8	8	8	8	8	8
2015.01.07	A889926701	A8899267	2012	1	1	2	A889	1	31	#NULL!	4	4	4	1	2056.87	5120.36	#NULL!	#NULL!	5810.73	8396.93	#NULL!	#NULL!	#NULL!	#NULL!	501	1	2	8	2	8	2	8	8	8	8	2	8	1	8	2	8	2	8	8	8	8	1	1	1
2015.01.07	A889926702	A8899267	2012	1	1	2	A889	2	30	#NULL!	4	4	4	2	2056.87	2537.62	#NULL!	#NULL!	2652.14	3250.49	#NULL!	#NULL!	#NULL!	#NULL!	501	1	2	8	1	2	2	8	8	8	8	2	8	1	8	2	8	1	2	1	1	2	1	1	1
2015.01.07	A889930301	A8899303	2012	1	1	2	A889	1	52	#NULL!	3	3	4	2	2056.87	5256.79	10187.1	9264.18	#NULL!	#NULL!	24666.9	#NULL!	#NULL!	#NULL!	501	1	1	2	1	1	2	8	1	3	2	2	8	1	8	2	8	1	2	2	2	2	1	2	1
2015.01.07	A889930302	A8899303	2012	1	1	2	A889	2	47	#NULL!	3	3	3	7	2056.87	3580.33	8413.63	#NULL!	#NULL!	#NULL!	#NULL!	#NULL!	#NULL!	#NULL!	501	1	2	8	2	8	2	8	1	3	2	1	2	1	8	1	1	1	2	1	1	2	1	1	1
2015.01.07	A889930303	A8899303	2012	1	1	2	A889	2	23	#NULL!	3	3	3	1	2056.87	2951.24	#NULL!	7443.52	#NULL!	#NULL!	#NULL!	#NULL!	#NULL!	#NULL!	501	1	2	8	2	8	2	8	8	8	8	2	8	1	8	2	8	1	1	1	1	2	1	1	1
2015.01.07	A889930304	A8899303	2012	1	1	2	A889	2	17	#NULL!	3	3	2	7	2056.87	2141.81	#NULL!	#NULL!	#NULL!	#NULL!	#NULL!	#NULL!	#NULL!	#NULL!	501	1	2	8	2	8	2	8	8	8	8	8	8	1	8	1	1	2	8	8	8	8	1	1	1
2015.01.07	A889931801	A8899318	2012	1	1	2	A889	1	42	#NULL!	2	3	4	2	2056.87	3378.21	#NULL!	10397.1	4334.23	12609.5	#NULL!	#NULL!	18719	#NULL!	501	1	2	8	1	2	2	8	2	8	8	2	8	1	8	2	8	1	1	2	2	1	1	1	1
2015.01.07	A889931802	A8899318	2012	1	1	2	A889	2	35	#NULL!	2	3	4	7	2056.87	1767.56	#NULL!	#NULL!	1985.42	4662.8	#NULL!	#NULL!	#NULL!	#NULL!	501	1	2	8	2	8	2	8	8	8	8	2	8	1	8	2	8	2	8	8	8	8	1	2	1
2015.01.07	A889931805	A8899318	2012	1	1	2	A889	1	2	26	2	3	1	#NULL!	2056.87	4527.84	#NULL!	#NULL!	1329.69	3330.5	#NULL!	#NULL!	#NULL!	#NULL!	501	1	8	8	8	8	8	8	8	8	8	8	8	8	8	8	8	8	8	8	8	8	8	8	8
2015.01.07	A890907501	A8909075	2012	1	1	2	A890	1	67	#NULL!	1	1	3	7	2739.94	1778.68	2583.49	#NULL!	2008.41	1950.71	#NULL!	2787.17	#NULL!	#NULL!	501	1	2	8	2	8	2	8	2	8	8	2	8	2	3	2	8	1	2	2	1	2	1	1	1
2015.01.07	A890907502	A8909075	2012	1	1	2	A890	2	63	#NULL!	1	1	1	7	2739.94	2072.49	2308.31	#NULL!	2034.39	1801.4	#NULL!	2524.92	#NULL!	#NULL!	501	1	2	8	2	8	2	8	2	8	8	2	8	2	3	2	8	2	8	8	8	8	1	1	1
2015.01.07	A890907503	A8909075	2012	1	1	2	A890	2	35	#NULL!	1	1	4	1	2739.94	2354.54	#NULL!	#NULL!	2489.19	3507.54	#NULL!	#NULL!	#NULL!	#NULL!	501	1	2	8	2	8	2	8	8	8	8	1	2	1	8	2	8	2	8	8	8	8	1	1	1
2015.01.07	A890910501	A8909105	2012	1	1	2	A890	1	33	#NULL!	4	4	4	7	2739.94	6820.78	#NULL!	#NULL!	7285.09	10527.5	#NULL!	#NULL!	#NULL!	#NULL!	501	1	1	2	1	2	2	8	8	8	8	2	8	1	8	2	8	1	1	2	2	2	1	1	1
2015.01.07	A890910502	A8909105	2012	1	1	2	A890	2	32	#NULL!	4	4	4	1	2739.94	3380.33	#NULL!	#NULL!	3325.07	4075.24	#NULL!	#NULL!	#NULL!	#NULL!	501	1	2	8	1	2	2	8	8	8	8	2	8	1	8	2	8	2	8	8	8	8	1	1	1
2015.01.07	A890912301	A8909123	2012	1	1	2	A890	2	64	#NULL!	4	3	1	7	2739.94	2072.49	2308.31	#NULL!	2034.39	1801.4	#NULL!	2524.92	#NULL!	#NULL!	501	1	1	2	2	8	2	8	2	8	8	1	2	2	3	2	8	2	8	8	8	8	1	1	1
2015.01.07	A890912302	A8909123	2012	1	1	2	A890	2	37	#NULL!	3	3	4	7	2739.94	2354.54	#NULL!	#NULL!	2489.19	3507.54	#NULL!	#NULL!	#NULL!	#NULL!	501	1	2	8	2	8	2	8	8	8	8	2	8	1	8	2	8	2	8	8	8	8	1	1	1
2015.01.07	A890912303	A8909123	2012	1	1	2	A890	1	2	35	4	3	1	#NULL!	2739.94	2270.68	#NULL!	#NULL!	2500.6	2505.33	#NULL!	#NULL!	#NULL!	#NULL!	501	1	8	8	8	8	8	8	8	8	8	8	8	8	8	8	8	8	8	8	8	8	8	8	8
2015.01.07	A890912304	A8909123	2012	1	1	2	A890	1	37	#NULL!	3	3	4	1	2739.94	3622.36	#NULL!	#NULL!	3779.41	6318.48	#NULL!	#NULL!	#NULL!	#NULL!	501	1	2	8	2	8	2	8	8	8	8	2	8	1	8	1	1	2	8	8	8	8	1	1	1
2015.01.07	A890914401	A8909144	2012	1	1	2	A890	1	70	#NULL!	4	3	3	7	2739.94	1387.19	#NULL!	#NULL!	4352.65	4929.82	#NULL!	#NULL!	#NULL!	#NULL!	501	1	1	2	2	8	1	2	2	8	8	2	8	2	3	2	8	1	1	2	1	2	1	1	1
2015.01.07	A890914402	A8909144	2012	1	1	2	A890	2	63	#NULL!	3	3	3	7	2739.94	2072.49	#NULL!	6185.7	#NULL!	#NULL!	#NULL!	#NULL!	#NULL!	#NULL!	501	1	2	8	2	8	2	8	2	8	8	2	8	1	8	1	2	2	8	8	8	8	1	1	1
2015.01.07	A890914403	A8909144	2012	1	1	2	A890	1	32	#NULL!	2	3	4	1	2739.94	6820.78	#NULL!	13922.1	#NULL!	#NULL!	#NULL!	#NULL!	#NULL!	#NULL!	501	1	2	8	2	8	2	8	8	8	8	2	8	1	8	2	8	1	1	1	1	2	1	1	1
2015.01.07	A890915001	A8909150	2012	1	1	2	A890	1	43	#NULL!	3	3	4	5	2739.94	4500.07	8520.83	#NULL!	5433.96	9485.33	#NULL!	13285.5	#NULL!	#NULL!	501	1	2	8	2	8	2	8	2	8	8	2	8	1	8	1	3	2	8	8	8	8	1	1	1
2015.01.07	A890915003	A8909150	2012	1	1	2	A890	2	13	#NULL!	3	3	1	#NULL!	2739.94	1780.47	#NULL!	3749.44	2019.98	3001.78	#NULL!	#NULL!	5710.36	#NULL!	501	1	2	8	2	8	2	8	8	8	8	8	8	1	8	1	1	1	2	1	1	2	1	1	1
2015.01.07	A890915004	A8909150	2012	1	1	2	A890	1	9	#NULL!	3	3	1	#NULL!	2739.94	2190.76	#NULL!	#NULL!	3238.79	2629.41	#NULL!	#NULL!	#NULL!	#NULL!	501	1	2	8	2	8	1	2	8	8	8	8	8	8	8	8	8	1	2	1	2	2	1	1	1
2015.01.07	A890915901	A8909159	2012	1	1	2	A890	1	57	#NULL!	2	3	3	7	2739.94	3771.01	4188.11	#NULL!	3886.39	3750.27	#NULL!	4869.28	#NULL!	#NULL!	501	1	1	2	2	8	2	8	2	8	8	2	8	1	8	1	1	2	8	8	8	8	1	1	1
2015.01.07	A890915902	A8909159	2012	1	1	2	A890	2	50	#NULL!	2	3	2	3	2739.94	2254.92	3630.2	7949.38	2326.99	2845.7	14765.4	4134.27	12633.4	15137.3	501	1	2	8	2	8	2	8	2	8	8	1	1	1	8	2	8	2	8	8	8	8	1	1	1
2015.01.07	A890915903	A8909159	2012	1	1	2	A890	2	26	#NULL!	2	3	4	1	2739.94	3175.97	#NULL!	7194.49	3498.11	4696.22	#NULL!	#NULL!	11905.1	#NULL!	501	1	2	8	2	8	2	8	8	8	8	1	1	1	8	2	8	2	8	8	8	8	1	1	1
2015.01.07	A890915904	A8909159	2012	1	1	2	A890	1	14	#NULL!	2	3	1	#NULL!	2739.94	1644.21	#NULL!	#NULL!	2231.38	3369.98	#NULL!	#NULL!	#NULL!	#NULL!	501	1	2	8	2	8	2	8	8	8	8	8	8	1	8	2	8	2	8	8	8	8	1	1	1
2015.01.07	A890917702	A8909177	2012	1	1	2	A890	1	65	#NULL!	4	3	3	7	2739.94	3557.36	5166.99	6012.62	2008.41	3901.42	9602.25	5574.35	6923.53	9423.7	501	1	2	8	2	8	2	8	2	8	8	1	2	1	8	2	8	1	2	2	2	2	1	1	1
2015.01.07	A890917703	A8909177	2012	1	1	2	A890	1	35	#NULL!	3	3	4	7	2739.94	7244.72	#NULL!	12876	3779.41	12637	#NULL!	#NULL!	15793.1	#NULL!	501	1	2	8	2	8	2	8	8	8	8	2	8	1	8	2	8	2	8	8	8	8	1	1	1
2015.01.07	A890918601	A8909186	2012	1	1	2	A890	1	68	#NULL!	1	1	3	7	2739.94	3557.36	#NULL!	#NULL!	2008.41	3901.42	#NULL!	#NULL!	#NULL!	#NULL!	501	1	2	8	2	8	2	8	2	8	8	2	8	1	8	1	2	2	8	8	8	8	1	1	1
2015.01.07	A890920401	A8909204	2012	1	1	2	A890	2	57	#NULL!	4	4	2	7	2739.94	2031.74	#NULL!	15629.2	2299.37	2383.55	#NULL!	#NULL!	17315.6	#NULL!	501	1	2	8	2	8	2	8	1	2	2	2	8	1	8	2	8	2	8	8	8	8	1	1	1
2015.01.07	A890920402	A8909204	2012	1	1	2	A890	1	64	#NULL!	4	4	1	5	2739.94	2816.37	#NULL!	#NULL!	3535.54	2366.78	#NULL!	#NULL!	#NULL!	#NULL!	501	1	2	8	1	2	2	8	2	8	8	2	8	1	8	2	8	1	1	1	1	2	1	1	1
2015.01.07	A890920403	A8909204	2012	1	1	2	A890	2	36	#NULL!	4	4	3	2	2739.94	2354.54	#NULL!	#NULL!	2489.19	3507.54	#NULL!	#NULL!	#NULL!	#NULL!	501	1	2	8	1	2	2	8	8	8	8	2	8	1	8	1	1	2	8	8	8	8	1	1	1
2015.01.07	A890920404	A8909204	2012	1	1	2	A890	2	31	#NULL!	4	4	4	2	2739.94	3380.33	#NULL!	#NULL!	3325.07	4075.24	#NULL!	#NULL!	#NULL!	#NULL!	501	1	2	8	2	8	2	8	8	8	8	2	8	1	8	1	1	2	8	8	8	8	1	1	1
2015.01.07	A890920405	A8909204	2012	1	1	2	A890	2	33	#NULL!	4	4	4	7	2739.94	3380.33	#NULL!	19511.4	3325.07	4075.24	#NULL!	#NULL!	22832.8	#NULL!	501	1	2	8	2	8	2	8	8	8	8	2	8	1	8	2	8	1	1	2	1	2	1	1	1
2015.01.07	A890920406	A8909204	2012	1	1	2	A890	2	2	25	4	4	1	#NULL!	2739.94	3496.73	#NULL!	#NULL!	3408.8	3353.98	#NULL!	#NULL!	#NULL!	#NULL!	501	1	8	8	8	8	8	8	8	8	8	8	8	8	8	8	8	8	8	8	8	8	8	8	8
2015.01.07	A890920407	A8909204	2012	1	1	2	A890	2	34	#NULL!	4	4	4	7	2739.94	3380.33	#NULL!	#NULL!	3325.07	4075.24	#NULL!	#NULL!	#NULL!	#NULL!	501	1	2	8	2	8	2	8	8	8	8	2	8	1	8	2	8	1	1	2	1	2	1	1	1
2015.01.07	A890921601	A8909216	2012	1	1	2	A890	1	83	#NULL!	4	2	4	7	2739.94	1436.68	#NULL!	#NULL!	1419.63	1643.27	#NULL!	#NULL!	#NULL!	#NULL!	501	1	2	8	2	8	2	8	2	8	8	2	8	3	1	2	8	2	8	8	8	8	1	1	1
2015.01.07	A890921602	A8909216	2012	1	1	2	A890	2	75	#NULL!	4	2	3	7	2739.94	1907.99	5867.88	#NULL!	1723.13	1775.13	#NULL!	6220.21	#NULL!	#NULL!	501	1	2	8	2	8	2	8	2	8	8	2	8	2	3	2	8	2	8	8	8	8	1	1	1
2015.01.07	A890922201	A8909222	2012	1	1	2	A890	1	32	#NULL!	3	3	4	5	2739.94	6820.78	#NULL!	#NULL!	7285.09	10527.5	#NULL!	#NULL!	#NULL!	#NULL!	501	1	2	8	1	2	2	8	8	8	8	2	8	4	3	1	2	1	1	1	1	2	1	1	1
2015.01.07	A890922202	A8909222	2012	1	1	2	A890	2	32	#NULL!	3	3	4	1	2739.94	3380.33	#NULL!	#NULL!	3325.07	4075.24	#NULL!	#NULL!	#NULL!	#NULL!	501	1	2	8	1	2	2	8	8	8	8	1	1	1	8	2	8	2	8	8	8	8	1	1	1
2015.01.07	A890922203	A8909222	2012	1	1	2	A890	1	1	13	4	3	1	#NULL!	2739.94	2270.68	#NULL!	#NULL!	2500.6	2505.33	#NULL!	#NULL!	#NULL!	#NULL!	501	1	8	8	8	8	8	8	8	8	8	8	8	8	8	8	8	8	8	8	8	8	8	8	8
2015.01.07	A890924001	A8909240	2012	1	1	2	A890	1	64	#NULL!	3	3	3	6	2739.94	3755.16	2871.74	#NULL!	3535.54	3155.7	#NULL!	3364.05	#NULL!	#NULL!	501	1	2	8	2	8	1	2	2	8	8	2	8	4	3	2	8	1	1	1	2	2	1	1	1
2015.01.07	A890924002	A8909240	2012	1	1	2	A890	2	54	#NULL!	2	3	2	7	2739.94	3006.56	3630.2	#NULL!	2326.99	3794.26	#NULL!	4134.27	#NULL!	#NULL!	501	1	2	8	2	8	2	8	2	8	8	2	8	1	8	2	8	2	8	8	8	8	1	1	1
2015.01.07	A890924004	A8909240	2012	1	1	2	A890	2	28	#NULL!	2	3	4	7	2739.94	4234.62	#NULL!	19185.3	3498.11	6261.63	#NULL!	#NULL!	23810.2	#NULL!	501	1	1	2	2	8	2	8	8	8	8	2	8	1	8	1	1	1	1	1	1	2	1	1	1
2015.01.07	A890924902	A8909249	2012	1	1	2	A890	2	30	#NULL!	1	2	4	7	2739.94	6760.66	#NULL!	#NULL!	3325.07	6112.87	#NULL!	#NULL!	#NULL!	#NULL!	501	1	2	8	2	8	2	8	8	8	8	2	8	1	8	2	8	2	8	8	8	8	1	1	1
2015.01.07	A890924903	A8909249	2012	1	1	2	A890	1	2	28	1	2	1	#NULL!	2739.94	2270.68	#NULL!	#NULL!	2500.6	3758	#NULL!	#NULL!	#NULL!	#NULL!	501	1	8	8	8	8	8	8	8	8	8	8	8	8	8	8	8	8	8	8	8	8	8	8	8
2015.01.07	A890925801	A8909258	2012	1	1	2	A890	1	74	#NULL!	1	1	3	7	2739.94	4161.57	5152.02	#NULL!	#NULL!	#NULL!	#NULL!	#NULL!	#NULL!	#NULL!	501	1	2	8	2	8	2	8	1	3	2	2	8	3	1	1	1	1	2	2	2	2	1	1	1
2015.01.07	A890927301	A8909273	2012	1	1	2	A890	1	46	#NULL!	4	4	4	5	2739.94	4062.99	6693.82	19220	6306.43	8102.18	26008.6	9663.83	20806.1	31617.4	501	1	2	8	2	8	2	8	2	8	8	2	8	1	8	1	2	1	1	1	1	2	1	1	1
2015.01.07	A890927302	A8909273	2012	1	1	2	A890	2	42	#NULL!	4	4	4	1	2739.94	2219.18	4441.93	#NULL!	2327.64	3459.94	#NULL!	4552.9	#NULL!	#NULL!	501	1	2	8	2	8	2	8	2	8	8	2	8	1	8	2	8	2	8	8	8	8	1	1	1
2015.01.07	A890927303	A8909273	2012	1	1	2	A890	2	17	#NULL!	4	4	2	1	2739.94	2685.26	#NULL!	10232	3828.24	5942.82	#NULL!	#NULL!	15261.8	#NULL!	501	1	1	2	2	8	1	2	8	8	8	8	8	1	8	2	8	2	8	8	8	8	1	1	1
2015.01.07	A890927304	A8909273	2012	1	1	2	A890	2	15	#NULL!	4	4	2	7	2739.94	2685.26	#NULL!	#NULL!	3828.24	5942.82	#NULL!	#NULL!	#NULL!	#NULL!	501	1	2	8	1	2	2	8	8	8	8	8	8	1	8	1	2	1	2	1	1	1	1	1	1
2015.01.07	A890927305	A8909273	2012	1	1	2	A890	2	66	#NULL!	4	4	1	6	2739.94	1326.57	1940.55	#NULL!	1463.31	1508.72	#NULL!	2071.6	#NULL!	#NULL!	501	1	2	8	2	8	1	2	2	8	8	1	2	2	3	1	2	1	1	2	1	2	1	1	1
2015.01.07	A890930903	A8909309	2012	1	1	2	A890	2	28	#NULL!	1	2	4	7	2739.94	6351.93	#NULL!	19185.3	6996.21	9392.44	#NULL!	#NULL!	23810.2	#NULL!	501	1	2	8	2	8	2	8	8	8	8	2	8	1	8	1	1	1	2	1	1	2	1	1	1
2015.01.07	A890930904	A8909309	2012	1	1	2	A890	2	31	#NULL!	1	2	3	2	2739.94	6760.66	#NULL!	#NULL!	6650.14	8150.49	#NULL!	#NULL!	#NULL!	#NULL!	501	1	2	8	2	8	2	8	8	8	8	2	8	1	8	2	8	1	2	1	1	2	1	1	1
2015.01.07	B941906001	B9419060	2012	2	1	2	B941	1	50	#NULL!	4	4	3	5	3285.99	4069.39	5396.86	#NULL!	6292.78	4912.26	#NULL!	6215.64	#NULL!	#NULL!	502	1	2	8	2	8	2	8	2	8	8	2	8	1	8	1	1	2	8	8	8	8	1	1	1
2015.01.07	B941906002	B9419060	2012	2	1	2	B941	2	45	#NULL!	4	4	4	7	3285.99	3579.23	4457.31	16477.9	3198.05	3291.38	17762.6	4286.34	15024.2	17748.2	502	1	2	8	2	8	2	8	2	8	8	2	8	1	8	2	8	1	1	1	1	2	1	1	1
2015.01.07	B941911101	B9419111	2012	2	1	2	B941	1	64	#NULL!	1	1	4	7	3285.99	4097.2	#NULL!	#NULL!	5339.77	1950.65	#NULL!	#NULL!	#NULL!	#NULL!	502	1	2	8	2	8	2	8	1	2	2	2	8	1	8	2	8	2	8	8	8	8	1	1	1
2015.01.07	B941911102	B9419111	2012	2	1	2	B941	2	4	52	1	1	1	#NULL!	3285.99	2401.06	#NULL!	#NULL!	2243.06	2764.29	#NULL!	#NULL!	#NULL!	#NULL!	502	1	2	8	2	8	2	8	8	8	8	8	8	8	8	8	8	8	8	8	8	8	8	8	8
2015.01.07	B941911403	B9419114	2012	2	1	2	B941	2	77	#NULL!	1	1	3	7	3285.99	3672.23	2603.48	#NULL!	3855.36	2926.05	#NULL!	2453.16	#NULL!	#NULL!	502	1	2	8	2	8	2	8	1	2	2	2	8	1	8	2	8	2	8	8	8	8	1	1	1
2015.01.07	B941913201	B9419132	2012	2	1	2	B941	2	50	#NULL!	4	4	3	7	3285.99	7400.69	6442.64	#NULL!	5917.05	4690.74	#NULL!	6522	#NULL!	#NULL!	502	1	2	8	1	2	2	8	2	8	8	2	8	1	8	2	8	1	1	2	2	2	1	1	1
2015.01.07	B941913502	B9419135	2012	2	1	2	B941	2	74	#NULL!	1	1	#NULL!	#NULL!	3285.99	1254.62	#NULL!	#NULL!	1200.86	1463.03	#NULL!	#NULL!	#NULL!	#NULL!	502	1	2	8	2	8	2	8	2	8	8	2	8	1	8	1	1	2	8	8	8	8	1	1	1
2015.01.07	B941916501	B9419165	2012	2	1	2	B941	1	73	#NULL!	4	4	4	7	3285.99	1916.41	#NULL!	#NULL!	1972.8	2708.71	#NULL!	#NULL!	#NULL!	#NULL!	502	1	2	8	2	8	2	8	2	8	8	2	8	1	8	1	1	1	1	1	1	2	1	1	1
2015.01.07	B941917401	B9419174	2012	2	1	2	B941	1	50	#NULL!	3	4	4	1	3285.99	6104.09	16190.6	#NULL!	6292.78	7368.4	#NULL!	18646.9	#NULL!	#NULL!	502	1	2	8	2	8	2	8	2	8	8	2	8	1	8	2	8	2	8	8	8	8	1	1	1
2015.01.07	B941917402	B9419174	2012	2	1	2	B941	2	41	#NULL!	3	4	4	2	3285.99	4351.02	#NULL!	#NULL!	3557.49	4277.42	#NULL!	#NULL!	#NULL!	#NULL!	502	1	2	8	1	1	2	8	1	2	2	2	8	1	8	1	2	1	1	2	2	2	1	1	1
2015.01.07	B941919801	B9419198	2012	2	1	2	B941	1	59	#NULL!	4	4	4	1	3285.99	4352.17	7432.79	8184.5	6606.92	4636.35	10218.1	7681.5	16333.3	9657.07	502	1	2	8	2	8	2	8	2	8	8	2	8	1	8	1	1	2	8	8	8	8	1	1	1
2015.01.07	B941919802	B9419198	2012	2	1	2	B941	2	59	#NULL!	4	4	3	7	3285.99	5758.36	#NULL!	#NULL!	5904.87	2946.71	#NULL!	#NULL!	#NULL!	#NULL!	502	1	2	8	2	8	2	8	2	8	8	1	2	1	8	2	8	1	1	1	1	2	2	1	1
2015.01.07	B941919803	B9419198	2012	2	1	2	B941	1	34	#NULL!	4	4	4	1	3285.99	10501.4	#NULL!	17339	#NULL!	#NULL!	#NULL!	#NULL!	#NULL!	#NULL!	502	1	1	2	2	8	2	8	8	8	8	2	8	1	8	2	8	2	8	8	8	8	1	1	1
2015.01.07	B941921901	B9419219	2012	2	1	2	B941	1	70	#NULL!	4	4	4	7	3285.99	958.204	#NULL!	#NULL!	#NULL!	#NULL!	#NULL!	#NULL!	#NULL!	#NULL!	502	1	2	8	2	8	2	8	2	8	8	2	8	3	3	2	8	2	8	8	8	8	1	1	1
2015.01.07	B941921902	B9419219	2012	2	1	2	B941	2	66	#NULL!	4	4	4	7	3285.99	3526.64	3443.96	7729.69	7591.75	2486.91	7159.38	3268.05	7685.86	6748.18	502	1	2	8	2	8	1	1	2	8	8	2	8	1	8	1	1	2	8	8	8	8	1	1	1
2015.01.07	B941922501	B9419225	2012	2	1	2	B941	1	46	#NULL!	4	4	4	1	3285.99	20540.9	5939.89	15958.1	13171	10016.5	8205.95	7622.56	18138.8	9975.57	502	1	2	8	2	8	2	8	2	8	8	2	8	1	8	2	8	2	8	8	8	8	1	1	1
2015.01.07	B941922503	B9419225	2012	2	1	2	B941	2	5	60	4	4	1	#NULL!	3285.99	4192.16	#NULL!	#NULL!	5165.05	4169.38	#NULL!	#NULL!	#NULL!	#NULL!	502	1	2	8	2	8	2	8	8	8	8	8	8	8	8	8	8	8	8	8	8	8	8	8	8
2015.01.07	B941923701	B9419237	2012	2	1	2	B941	2	57	#NULL!	4	4	4	1	3285.99	5758.36	2516.52	6488.35	3936.58	1964.47	6568.56	2521.77	6289.9	6373.74	502	1	2	8	2	8	2	8	2	8	8	2	8	1	8	1	1	2	8	8	8	8	1	1	1
2015.01.07	B941925201	B9419252	2012	2	1	2	B941	1	50	#NULL!	1	1	3	5	3285.99	6104.09	#NULL!	#NULL!	#NULL!	#NULL!	#NULL!	#NULL!	#NULL!	#NULL!	502	1	2	8	2	8	2	8	2	8	8	2	8	1	8	2	8	2	8	8	8	8	1	1	1
2015.01.07	B941925203	B9419252	2012	2	1	2	B941	2	78	#NULL!	1	1	1	7	3285.99	2754.17	7810.45	#NULL!	5783.03	4389.08	#NULL!	7359.49	#NULL!	#NULL!	502	1	2	8	1	1	2	8	1	1	2	2	8	2	3	1	1	1	2	2	2	2	1	1	1
2015.01.07	B941925801	B9419258	2012	2	1	2	B941	2	37	#NULL!	3	4	#NULL!	#NULL!	3285.99	7273.27	#NULL!	15648.3	3382.62	3854.46	#NULL!	#NULL!	13889.1	#NULL!	502	1	2	8	1	2	2	8	8	8	8	2	8	1	8	2	8	1	1	2	2	2	1	1	1
2015.01.07	B941925803	B9419258	2012	2	1	2	B941	1	5	68	4	4	#NULL!	#NULL!	3285.99	1726.75	#NULL!	#NULL!	1702.7	2889.48	#NULL!	#NULL!	#NULL!	#NULL!	502	1	1	2	1	2	1	2	8	8	8	8	8	8	8	8	8	8	8	8	8	8	8	8	8
2015.01.07	B941925804	B9419258	2012	2	1	2	B941	2	4	56	4	4	#NULL!	#NULL!	3285.99	2401.06	#NULL!	#NULL!	2243.06	3685.72	#NULL!	#NULL!	#NULL!	#NULL!	502	1	2	8	2	8	2	8	8	8	8	8	8	8	8	8	8	8	8	8	8	8	8	8	8
2015.01.07	B941927301	B9419273	2012	2	1	2	B941	2	45	#NULL!	3	4	4	7	3285.99	3579.23	4457.31	#NULL!	4797.07	4937.07	#NULL!	4286.34	#NULL!	#NULL!	502	1	2	8	1	1	2	8	1	1	1	2	8	1	8	2	8	2	8	8	8	8	1	1	1
2015.01.07	B941927303	B9419273	2012	2	1	2	B941	1	18	#NULL!	3	4	3	7	3285.99	13826.6	#NULL!	#NULL!	7585.98	7427.35	#NULL!	#NULL!	#NULL!	#NULL!	502	1	2	8	1	2	2	8	8	8	8	8	8	1	8	2	8	1	1	2	2	1	1	1	1
2015.01.07	B941931202	B9419312	2012	2	1	2	B941	2	44	#NULL!	4	4	4	7	3285.99	5801.36	7883.26	#NULL!	7114.99	3802.15	#NULL!	7182.4	#NULL!	#NULL!	502	1	2	8	2	8	2	8	2	8	8	2	8	1	8	2	8	2	8	8	8	8	1	1	1
2015.01.07	B941931203	B9419312	2012	2	1	2	B941	2	9	#NULL!	4	4	1	#NULL!	3285.99	4192.16	#NULL!	#NULL!	5165.05	3706.12	#NULL!	#NULL!	#NULL!	#NULL!	502	1	1	2	1	2	2	8	8	8	8	8	8	8	8	8	8	2	8	8	8	8	1	1	1
2015.01.07	B941931204	B9419312	2012	2	1	2	B941	2	5	62	4	4	1	#NULL!	3285.99	4192.16	#NULL!	#NULL!	5165.05	3706.12	#NULL!	#NULL!	#NULL!	#NULL!	502	1	2	8	2	8	2	8	8	8	8	8	8	8	8	8	8	8	8	8	8	8	8	8	8
2015.01.07	B941931801	B9419318	2012	2	1	2	B941	2	46	#NULL!	4	4	4	7	3285.99	7158.46	#NULL!	#NULL!	6396.1	6582.76	#NULL!	#NULL!	#NULL!	#NULL!	502	1	2	8	2	8	2	8	2	8	8	2	8	1	8	2	8	2	8	8	8	8	1	1	1
2015.01.07	B942916802	B9429168	2012	2	1	1	B942	2	70	#NULL!	4	2	1	7	7359.48	4214.87	15597.2	#NULL!	#NULL!	#NULL!	#NULL!	#NULL!	#NULL!	#NULL!	513	1	2	8	2	8	2	8	2	8	8	2	8	2	3	2	8	1	1	2	1	2	1	1	1
2015.01.07	B942916803	B9429168	2012	2	1	1	B942	2	44	#NULL!	2	2	4	1	7359.48	9744.77	#NULL!	#NULL!	13790	20683.3	#NULL!	#NULL!	#NULL!	#NULL!	513	1	2	8	2	8	2	8	2	8	8	2	8	1	8	2	8	2	8	8	8	8	1	1	1
2015.01.07	B942917101	B9429171	2012	2	1	1	B942	1	61	#NULL!	3	3	1	5	7359.48	18352.6	#NULL!	#NULL!	#NULL!	#NULL!	#NULL!	#NULL!	#NULL!	#NULL!	513	1	2	8	2	8	2	8	2	8	8	2	8	1	8	1	2	2	8	8	8	8	1	1	1
2015.01.07	B942917104	B9429171	2012	2	1	1	B942	2	32	#NULL!	2	3	#NULL!	#NULL!	7359.48	16279.6	#NULL!	#NULL!	#NULL!	#NULL!	#NULL!	#NULL!	#NULL!	#NULL!	513	1	2	8	1	2	2	8	8	8	8	2	8	1	8	1	1	1	1	2	1	1	1	1	1
2015.01.07	B942920701	B9429207	2012	2	1	1	B942	1	37	#NULL!	1	2	4	5	7359.48	18238.5	#NULL!	27162.9	20180.3	22443.8	#NULL!	#NULL!	40812.9	#NULL!	513	1	2	8	1	2	2	8	8	8	8	2	8	2	3	2	8	2	8	8	8	8	1	1	1
2015.01.07	B942921001	B9429210	2012	2	1	1	B942	1	55	#NULL!	1	1	1	7	7359.48	9747.36	7421.52	#NULL!	11382.5	8653.18	#NULL!	9587.31	#NULL!	#NULL!	513	1	2	8	2	8	2	8	2	8	8	2	8	1	8	2	8	2	8	8	8	8	1	1	1
2015.01.07	B942922801	B9429228	2012	2	1	1	B942	1	74	#NULL!	1	1	3	7	7359.48	2146.04	9129.62	#NULL!	2549.07	3791.61	#NULL!	11334.8	#NULL!	#NULL!	513	1	2	8	2	8	2	8	1	2	2	2	8	1	8	2	8	2	8	8	8	8	1	1	1
2015.01.07	B942922802	B9429228	2012	2	1	1	B942	2	64	#NULL!	1	1	1	6	7359.48	8342.05	#NULL!	17398.9	8226.55	4156.47	#NULL!	#NULL!	24996.7	#NULL!	513	1	2	8	2	8	2	8	2	8	8	2	8	1	8	2	8	2	8	8	8	8	1	1	1
2015.01.07	B942923101	B9429231	2012	2	1	1	B942	1	70	#NULL!	1	1	2	7	7359.48	2146.04	4564.81	69954.6	2549.07	3791.61	93549.1	5667.42	86667.8	105688	513	1	2	8	2	8	1	2	2	8	8	2	8	3	3	1	2	2	8	8	8	8	1	1	1
2015.01.07	B942923102	B9429231	2012	2	1	1	B942	2	65	#NULL!	1	1	1	7	7359.48	7898.44	3438.73	#NULL!	9809.35	3481.14	#NULL!	4078.86	#NULL!	#NULL!	513	1	2	8	2	8	2	8	2	8	8	2	8	1	8	1	3	1	1	1	1	2	2	1	1
2015.01.07	B942923701	B9429237	2012	2	1	1	B942	1	35	#NULL!	1	2	4	3	7359.48	11573.2	#NULL!	#NULL!	#NULL!	#NULL!	#NULL!	#NULL!	#NULL!	#NULL!	513	1	2	8	1	2	2	8	8	8	8	2	8	1	8	2	8	2	8	8	8	8	1	1	1
2015.01.07	B942923702	B9429237	2012	2	1	1	B942	2	38	#NULL!	1	2	4	7	7359.48	8144.8	#NULL!	26506	17482.8	10116.4	#NULL!	#NULL!	32936.6	#NULL!	513	1	2	8	2	8	1	2	8	8	8	2	8	1	8	2	8	2	8	8	8	8	1	1	1
2015.01.07	B942923703	B9429237	2012	2	1	1	B942	1	8	#NULL!	1	2	1	#NULL!	7359.48	6824.68	#NULL!	#NULL!	3364.82	7583.71	#NULL!	#NULL!	#NULL!	#NULL!	513	1	1	1	2	8	1	2	8	8	8	8	8	8	8	8	8	2	8	8	8	8	1	2	1
2015.01.07	B942923704	B9429237	2012	2	1	1	B942	1	7	#NULL!	1	2	1	#NULL!	7359.48	6824.68	#NULL!	#NULL!	3364.82	7583.71	#NULL!	#NULL!	#NULL!	#NULL!	513	1	2	8	2	8	1	2	8	8	8	8	8	8	8	8	8	2	8	8	8	8	1	1	1
2015.01.07	B942923705	B9429237	2012	2	1	1	B942	1	4	49	1	2	1	#NULL!	7359.48	9351.85	#NULL!	#NULL!	5236.64	7225.85	#NULL!	#NULL!	#NULL!	#NULL!	513	1	2	8	2	8	1	2	8	8	8	8	8	8	8	8	8	8	8	8	8	8	8	8	8
2015.01.07	B942925202	B9429252	2012	2	1	1	B942	2	71	#NULL!	2	1	1	7	7359.48	2809.92	5199.07	#NULL!	3103.27	4095.84	#NULL!	6123.61	#NULL!	#NULL!	513	1	2	8	2	8	2	8	2	8	8	2	8	1	8	2	8	1	2	2	2	2	2	2	1
2015.01.07	B942927001	B9429270	2012	2	1	1	B942	1	51	#NULL!	3	3	2	5	7359.48	9114.02	10777.3	13782.5	16261.9	13752.2	32620.1	15515.5	18952.3	32630.6	513	1	2	8	1	2	2	8	2	8	8	2	8	1	8	1	1	1	2	2	2	1	2	1	1
2015.01.07	B942927002	B9429270	2012	2	1	1	B942	2	48	#NULL!	2	3	2	7	7359.48	8016.23	8901.09	13955.6	8264.45	9214.43	36949.2	10699.6	17814.2	36919.4	513	1	2	8	2	8	2	8	2	8	8	2	8	1	8	2	8	2	8	8	8	8	1	1	1
2015.01.07	B942927301	B9429273	2012	2	1	1	B942	1	65	#NULL!	3	2	1	7	7359.48	11136.5	4578.07	#NULL!	12069.3	6751.45	#NULL!	5487.77	#NULL!	#NULL!	513	1	2	8	2	8	2	8	2	8	8	2	8	2	3	2	8	2	8	8	8	8	1	1	1
2015.01.07	B942927302	B9429273	2012	2	1	1	B942	2	55	#NULL!	2	2	1	7	7359.48	17735.7	5025.41	#NULL!	15259.4	8249.52	#NULL!	6294.86	#NULL!	#NULL!	513	1	2	8	2	8	2	8	1	2	2	2	8	1	8	1	2	1	1	2	1	1	1	1	1
2015.01.07	B942928503	B9429285	2012	2	1	1	B942	1	30	#NULL!	1	1	3	7	7359.48	20293.5	#NULL!	19579.9	#NULL!	#NULL!	#NULL!	#NULL!	#NULL!	#NULL!	513	1	2	8	2	8	2	8	8	8	8	2	8	1	8	2	8	2	8	8	8	8	1	1	1
2015.01.07	B942928801	B9429288	2012	2	1	1	B942	1	75	#NULL!	3	1	2	7	7359.48	7658.62	4564.81	#NULL!	6988.71	3791.61	#NULL!	5667.42	#NULL!	#NULL!	513	1	2	8	2	8	2	8	1	2	2	2	8	2	3	2	8	2	8	8	8	8	1	1	1
2015.01.07	B942928802	B9429288	2012	2	1	1	B942	2	76	#NULL!	3	1	1	7	7359.48	4112.26	5199.07	#NULL!	4981.53	4095.84	#NULL!	6123.61	#NULL!	#NULL!	513	1	2	8	2	8	2	8	1	2	2	1	1	1	8	1	2	1	2	2	2	1	1	1	1
2015.01.07	B942930002	B9429300	2012	2	1	1	B942	2	41	#NULL!	1	2	2	7	7359.48	9744.77	15742.6	#NULL!	#NULL!	#NULL!	#NULL!	#NULL!	#NULL!	#NULL!	513	1	2	8	2	8	2	8	1	2	2	2	8	1	8	1	2	2	8	8	8	8	1	1	1
2015.01.07	B942930003	B9429300	2012	2	1	1	B942	2	19	#NULL!	1	2	3	3	7359.48	19302.7	#NULL!	53962.8	#NULL!	#NULL!	#NULL!	#NULL!	#NULL!	#NULL!	513	1	2	8	2	8	2	8	8	8	8	1	1	1	8	1	1	2	8	8	8	8	1	1	1
2015.01.07	B942931501	B9429315	2012	2	1	1	B942	1	77	#NULL!	1	1	1	7	7359.48	7658.62	#NULL!	#NULL!	6988.71	3791.61	#NULL!	#NULL!	#NULL!	#NULL!	513	1	2	8	2	8	2	8	2	8	8	2	8	2	3	1	2	2	8	8	8	8	1	1	1
2015.01.07	B942931801	B9429318	2012	2	1	1	B942	1	81	#NULL!	3	2	1	7	7359.48	7658.62	4564.81	#NULL!	6988.71	3791.61	#NULL!	5667.42	#NULL!	#NULL!	513	1	2	8	2	8	2	8	1	1	2	2	8	1	8	2	8	1	1	2	2	2	1	1	1
2015.01.07	B942931802	B9429318	2012	2	1	1	B942	2	77	#NULL!	3	2	1	7	7359.48	4112.26	5199.07	#NULL!	4981.53	4095.84	#NULL!	6123.61	#NULL!	#NULL!	513	1	2	8	2	8	2	8	2	8	8	1	2	1	8	2	8	1	1	2	1	2	1	1	1
2015.01.07	B943903601	B9439036	2012	2	1	2	B943	1	46	#NULL!	4	4	4	1	4534.24	20077.6	5916.11	#NULL!	18174.2	9214.31	#NULL!	10628.9	#NULL!	#NULL!	502	1	2	8	2	8	1	2	2	8	8	2	8	1	8	1	1	2	8	8	8	8	1	1	1
2015.01.07	B943903602	B9439036	2012	2	1	2	B943	2	45	#NULL!	4	4	4	1	4534.24	4938.87	4439.46	#NULL!	4412.89	4541.67	#NULL!	5976.85	#NULL!	#NULL!	502	1	1	2	1	2	2	8	2	8	8	2	8	1	8	2	8	1	2	1	1	2	1	1	1
2015.01.07	B943903603	B9439036	2012	2	1	2	B943	1	17	#NULL!	4	4	2	7	4534.24	7182.63	#NULL!	#NULL!	6978.45	6832.52	#NULL!	#NULL!	#NULL!	#NULL!	502	1	2	8	2	8	2	8	8	8	8	8	8	1	8	2	8	2	8	8	8	8	2	1	1
2015.01.07	B943903604	B9439036	2012	2	1	2	B943	1	16	#NULL!	4	4	2	7	4534.24	7182.63	#NULL!	#NULL!	6978.45	6832.52	#NULL!	#NULL!	#NULL!	#NULL!	502	1	2	8	2	8	1	2	8	8	8	8	8	1	8	2	8	2	8	8	8	8	1	1	1
2015.01.07	B943903605	B9439036	2012	2	1	2	B943	2	10	#NULL!	4	4	1	#NULL!	4534.24	6379.41	#NULL!	22741.9	6465.53	3413.82	#NULL!	#NULL!	20204.1	#NULL!	502	1	2	8	2	8	1	2	8	8	8	8	8	8	8	8	8	1	2	1	1	2	1	1	1
2015.01.07	B943904502	B9439045	2012	2	1	2	B943	2	36	#NULL!	3	3	4	7	4534.24	5018.08	#NULL!	#NULL!	9335.14	5318.66	#NULL!	#NULL!	#NULL!	#NULL!	502	1	2	8	1	1	2	8	8	8	8	1	1	1	8	1	1	1	1	1	1	2	1	1	1
2015.01.07	B943904503	B9439045	2012	2	1	2	B943	2	7	#NULL!	3	3	1	#NULL!	4534.24	6222.13	#NULL!	#NULL!	7666.12	5113.96	#NULL!	#NULL!	#NULL!	#NULL!	502	1	2	8	2	8	1	2	8	8	8	8	8	8	8	8	8	1	1	1	1	2	1	1	1
2015.01.07	B943904504	B9439045	2012	2	1	2	B943	1	3	45	4	3	1	#NULL!	4534.24	3511.93	#NULL!	#NULL!	3441.43	3798.96	#NULL!	#NULL!	#NULL!	#NULL!	502	1	8	8	8	8	8	8	8	8	8	8	8	8	8	8	8	8	8	8	8	8	8	8	8
2015.01.07	B943907501	B9439075	2012	2	1	2	B943	1	40	#NULL!	4	4	4	1	4534.24	14861	7530.84	#NULL!	24282	10787.3	#NULL!	14612.2	#NULL!	#NULL!	502	1	2	8	2	8	2	8	2	8	8	2	8	1	8	2	8	2	8	8	8	8	1	1	1
2015.01.07	B943907502	B9439075	2012	2	1	2	B943	2	36	#NULL!	4	4	4	1	4534.24	5018.08	#NULL!	13548.3	4667.57	3988.99	#NULL!	#NULL!	13528.4	#NULL!	502	1	2	8	2	8	2	8	8	8	8	2	8	1	8	2	8	2	8	8	8	8	1	1	1
2015.01.07	B943909601	B9439096	2012	2	1	2	B943	1	69	#NULL!	3	3	4	1	4534.24	4574.19	2283.33	6483.37	4296.35	2218.47	10561.1	3065.5	7348.95	25911.9	502	1	2	8	2	8	2	8	2	8	8	2	8	1	8	1	1	2	8	8	8	8	1	1	1
2015.01.07	B943909602	B9439096	2012	2	1	2	B943	2	63	#NULL!	3	3	4	7	4534.24	5139.61	2040.12	#NULL!	4392.66	2048.67	#NULL!	2777.06	#NULL!	#NULL!	502	1	2	8	1	1	2	8	2	8	8	1	1	1	8	2	8	1	1	2	2	2	1	1	1
2015.01.07	B943910501	B9439105	2012	2	1	2	B943	1	42	#NULL!	3	3	4	1	4534.24	14861	7530.84	#NULL!	#NULL!	#NULL!	#NULL!	#NULL!	#NULL!	#NULL!	502	1	2	8	2	8	1	2	2	8	8	2	8	1	8	2	8	1	1	1	1	2	1	1	1
2015.01.07	B943910502	B9439105	2012	2	1	2	B943	2	38	#NULL!	3	3	4	7	4534.24	5018.08	#NULL!	#NULL!	9335.14	4986.24	#NULL!	#NULL!	#NULL!	#NULL!	502	1	2	8	2	8	2	8	8	8	8	2	8	1	8	2	8	2	8	8	8	8	1	1	1
2015.01.07	B943910503	B9439105	2012	2	1	2	B943	2	10	#NULL!	3	3	1	#NULL!	4534.24	6379.41	#NULL!	#NULL!	6465.53	4267.27	#NULL!	#NULL!	#NULL!	#NULL!	502	1	2	8	2	8	1	2	8	8	8	8	8	8	8	8	8	2	8	8	8	8	1	1	1
2015.01.07	B943910504	B9439105	2012	2	1	2	B943	1	6	74	3	3	1	#NULL!	4534.24	2562.89	#NULL!	#NULL!	2527.2	3737.91	#NULL!	#NULL!	#NULL!	#NULL!	502	1	2	8	2	8	2	8	8	8	8	8	8	8	8	8	8	2	8	8	8	8	1	1	1
2015.01.07	B943910505	B9439105	2012	2	1	2	B943	1	6	74	3	3	1	#NULL!	4534.24	2562.89	#NULL!	#NULL!	2527.2	3737.91	#NULL!	#NULL!	#NULL!	#NULL!	502	1	2	8	1	2	2	8	8	8	8	8	8	8	8	8	8	1	2	1	1	2	1	1	1
2015.01.07	B943912001	B9439120	2012	2	1	2	B943	1	61	#NULL!	4	4	2	5	4534.24	5653.6	2538.09	#NULL!	#NULL!	#NULL!	#NULL!	#NULL!	#NULL!	#NULL!	502	1	2	8	2	8	2	8	2	8	8	2	8	1	8	1	1	2	8	8	8	8	1	1	1
2015.01.07	B943912002	B9439120	2012	2	1	2	B943	2	58	#NULL!	4	4	1	3	4534.24	7945.79	2506.45	11235.2	#NULL!	#NULL!	15265.3	#NULL!	#NULL!	#NULL!	502	1	2	8	1	2	2	8	2	8	8	2	8	1	8	2	8	1	1	2	1	2	1	1	1
2015.01.07	B943912003	B9439120	2012	2	1	2	B943	2	32	#NULL!	4	4	4	3	4534.24	5015	#NULL!	#NULL!	#NULL!	#NULL!	#NULL!	#NULL!	#NULL!	#NULL!	502	1	2	8	2	8	2	8	8	8	8	2	8	1	8	1	1	2	8	8	8	8	1	1	1
2015.01.07	B943912004	B9439120	2012	2	1	2	B943	1	28	#NULL!	4	4	4	3	4534.24	26964.6	#NULL!	10840.5	31347.3	26219.3	#NULL!	#NULL!	32905	#NULL!	502	1	1	2	1	2	2	8	8	8	8	2	8	1	8	2	8	1	1	1	1	2	1	1	1
2015.01.07	B943912601	B9439126	2012	2	1	2	B943	1	46	#NULL!	4	4	4	3	4534.24	20077.6	5916.11	13816.5	#NULL!	#NULL!	19070.6	#NULL!	#NULL!	#NULL!	502	1	2	8	2	8	1	2	2	8	8	2	8	1	8	2	8	1	1	1	1	2	1	1	1
2015.01.07	B943912602	B9439126	2012	2	1	2	B943	2	40	#NULL!	4	4	4	2	4534.24	4002.56	3925.85	#NULL!	14726.6	7869.72	#NULL!	10015.1	#NULL!	#NULL!	502	1	2	8	2	8	2	8	1	3	2	2	8	1	8	1	1	1	1	1	1	2	1	1	1
2015.01.07	B943912603	B9439126	2012	2	1	2	B943	2	15	#NULL!	4	4	2	7	4534.24	15768.7	#NULL!	20687	#NULL!	#NULL!	#NULL!	#NULL!	#NULL!	#NULL!	502	1	2	8	2	8	1	2	8	8	8	8	8	1	8	1	1	2	8	8	8	8	1	1	1
2015.01.07	B943912604	B9439126	2012	2	1	2	B943	1	11	#NULL!	4	4	1	#NULL!	4534.24	6607.89	#NULL!	#NULL!	4960.32	7665.11	#NULL!	#NULL!	#NULL!	#NULL!	502	1	2	8	1	2	2	8	8	8	8	8	8	8	8	8	8	2	8	8	8	8	1	1	1
2015.01.07	B943915002	B9439150	2012	2	1	2	B943	2	47	#NULL!	4	4	4	7	4534.24	14816.6	8878.92	#NULL!	17651.6	18166.7	#NULL!	11953.7	#NULL!	#NULL!	502	1	1	2	2	8	2	8	2	8	8	2	8	1	8	2	8	2	8	8	8	8	1	1	1
2015.01.07	B943916801	B9439168	2012	2	1	2	B943	1	37	#NULL!	2	3	4	3	4534.24	7130.35	#NULL!	13884.1	7597.09	7185.77	#NULL!	#NULL!	33526.9	#NULL!	502	1	2	8	1	2	2	8	8	8	8	2	8	1	8	2	8	1	1	2	1	2	1	1	1
2015.01.07	B943916802	B9439168	2012	2	1	2	B943	2	37	#NULL!	2	3	3	7	4534.24	5018.08	#NULL!	#NULL!	4667.57	3988.99	#NULL!	#NULL!	#NULL!	#NULL!	502	1	2	8	2	8	2	8	8	8	8	2	8	1	8	1	1	2	8	8	8	8	1	1	1
2015.01.07	B943916803	B9439168	2012	2	1	2	B943	1	12	#NULL!	3	3	1	#NULL!	4534.24	9251.05	#NULL!	#NULL!	5425.35	3832.56	#NULL!	#NULL!	#NULL!	#NULL!	502	1	1	2	1	2	2	8	8	8	8	8	8	1	8	2	8	2	8	8	8	8	1	1	1
2015.01.07	B943916804	B9439168	2012	2	1	2	B943	1	10	#NULL!	3	3	1	#NULL!	4534.24	6607.89	#NULL!	#NULL!	4960.32	3832.56	#NULL!	#NULL!	#NULL!	#NULL!	502	1	2	8	2	8	1	2	8	8	8	8	8	8	8	8	8	1	2	2	1	1	1	1	1
2015.01.07	B943918302	B9439183	2012	2	1	2	B943	2	48	#NULL!	1	2	3	6	4534.24	7408.31	8878.92	10699.9	6619.34	6812.51	20640	11953.7	10975.5	51558.5	502	1	2	8	1	2	2	8	2	8	8	2	8	1	8	2	8	1	2	1	1	2	1	1	1
2015.01.07	B943918303	B9439183	2012	2	1	2	B943	2	21	#NULL!	1	2	3	7	4534.24	5574.15	#NULL!	8490.51	4968.63	8365.25	#NULL!	#NULL!	9655.3	#NULL!	502	1	2	8	1	1	2	8	8	8	8	1	1	1	8	1	1	1	1	2	1	2	1	1	1
2015.01.07	B943921301	B9439213	2012	2	1	2	B943	1	42	#NULL!	4	4	4	1	4534.24	14861	7530.84	#NULL!	#NULL!	#NULL!	#NULL!	#NULL!	#NULL!	#NULL!	502	1	2	8	2	8	2	8	2	8	8	2	8	1	8	2	8	2	8	8	8	8	1	1	1
2015.01.07	B943921302	B9439213	2012	2	1	2	B943	2	38	#NULL!	4	4	4	7	4534.24	5018.08	#NULL!	13548.3	9335.14	5318.66	#NULL!	#NULL!	10146.3	#NULL!	502	1	1	2	1	1	2	8	8	8	8	1	1	1	8	2	8	1	1	1	1	2	1	1	1
2015.01.07	B943921303	B9439213	2012	2	1	2	B943	1	11	#NULL!	4	4	1	#NULL!	4534.24	6607.89	#NULL!	8276.92	4960.32	5110.08	#NULL!	#NULL!	6811.2	#NULL!	502	1	1	2	2	8	2	8	8	8	8	8	8	8	8	8	8	1	2	2	2	2	1	1	1
2015.01.07	B943921304	B9439213	2012	2	1	2	B943	1	9	#NULL!	4	4	1	#NULL!	4534.24	2562.89	#NULL!	#NULL!	2527.2	3987.11	#NULL!	#NULL!	#NULL!	#NULL!	502	1	2	8	2	8	1	2	8	8	8	8	8	8	8	8	8	2	8	8	8	8	1	1	1
2015.01.07	B943921601	B9439216	2012	2	1	2	B943	1	51	#NULL!	4	4	4	3	4534.24	5615.23	5375.26	#NULL!	8683.21	6778.29	#NULL!	8667.06	#NULL!	#NULL!	502	1	2	8	2	8	2	8	2	8	8	2	8	1	8	1	1	1	1	2	1	2	1	1	1
2015.01.07	B943921602	B9439216	2012	2	1	2	B943	2	50	#NULL!	4	4	4	1	4534.24	5105.99	3208.43	#NULL!	4082.38	3236.31	#NULL!	4547.12	#NULL!	#NULL!	502	1	2	8	1	2	2	8	2	8	8	2	8	1	8	2	8	1	1	2	1	1	1	1	1
2015.01.07	B943922501	B9439225	2012	2	1	2	B943	1	49	#NULL!	4	4	4	1	4534.24	20077.6	5916.11	#NULL!	22442.5	12285.7	#NULL!	10628.9	#NULL!	#NULL!	502	1	2	8	2	8	2	8	2	8	8	2	8	2	3	2	8	1	1	1	1	2	1	1	1
2015.01.07	B943922502	B9439225	2012	2	1	2	B943	2	47	#NULL!	4	4	3	7	4534.24	4938.87	4439.46	#NULL!	5883.86	6055.57	#NULL!	5976.85	#NULL!	#NULL!	502	1	2	8	1	1	2	8	2	8	8	1	1	1	8	2	8	1	1	2	1	1	1	1	1
2015.01.07	B943922503	B9439225	2012	2	1	2	B943	2	22	#NULL!	4	4	3	7	4534.24	3716.1	#NULL!	16981	4416.56	7435.78	#NULL!	#NULL!	25747.5	#NULL!	502	1	2	8	2	8	2	8	8	8	8	2	8	1	8	2	8	2	8	8	8	8	1	1	1
2015.01.07	B943922504	B9439225	2012	2	1	2	B943	1	18	#NULL!	4	4	3	6	4534.24	7182.63	#NULL!	10293.4	#NULL!	#NULL!	#NULL!	#NULL!	#NULL!	#NULL!	502	1	1	2	2	8	2	8	8	8	8	8	8	1	8	2	8	1	2	2	1	1	1	1	1
2015.01.07	B943928201	B9439282	2012	2	1	2	B943	1	43	#NULL!	4	4	3	3	4534.24	14861	7530.84	#NULL!	24282	10787.3	#NULL!	14612.2	#NULL!	#NULL!	502	1	2	8	2	8	1	2	1	2	2	2	8	1	8	2	8	2	8	8	8	8	1	1	1
2015.01.07	B943928202	B9439282	2012	2	1	2	B943	2	39	#NULL!	4	4	3	7	4534.24	5018.08	#NULL!	#NULL!	4667.57	3988.99	#NULL!	#NULL!	#NULL!	#NULL!	502	1	2	8	2	8	2	8	8	8	8	2	8	1	8	1	2	1	2	2	2	2	1	1	1
2015.01.07	B943928203	B9439282	2012	2	1	2	B943	2	12	#NULL!	4	4	1	#NULL!	4534.24	8931.17	#NULL!	#NULL!	7071.68	3413.82	#NULL!	#NULL!	#NULL!	#NULL!	502	1	2	8	2	8	2	8	8	8	8	8	8	1	8	2	8	1	1	2	1	2	1	1	1
2015.01.07	B943928204	B9439282	2012	2	1	2	B943	2	9	#NULL!	4	4	1	#NULL!	4534.24	6222.13	#NULL!	#NULL!	7666.12	3835.47	#NULL!	#NULL!	#NULL!	#NULL!	502	1	1	2	2	8	2	8	8	8	8	8	8	8	8	8	8	2	8	8	8	8	1	1	1
2015.01.07	B943929401	B9439294	2012	2	1	2	B943	1	50	#NULL!	2	2	4	1	4534.24	5615.23	8062.88	14089.7	#NULL!	#NULL!	27332.6	#NULL!	#NULL!	#NULL!	502	1	2	8	2	8	2	8	1	3	1	2	8	1	8	1	1	2	8	8	8	8	1	1	1
2015.01.07	B943929402	B9439294	2012	2	1	2	B943	2	49	#NULL!	2	2	4	1	4534.24	4938.87	6659.19	#NULL!	#NULL!	#NULL!	#NULL!	#NULL!	#NULL!	#NULL!	502	1	2	8	1	2	2	8	2	8	8	2	8	1	8	2	8	1	1	1	1	2	1	1	1
2015.01.07	B943929403	B9439294	2012	2	1	2	B943	1	22	#NULL!	2	2	3	3	4534.24	10649	#NULL!	13336.7	#NULL!	#NULL!	#NULL!	#NULL!	#NULL!	#NULL!	502	1	1	2	1	1	2	8	8	8	8	2	8	1	8	2	8	1	1	2	2	1	2	2	1
2015.01.07	B943930901	B9439309	2012	2	1	2	B943	1	50	#NULL!	4	4	4	1	4534.24	5615.23	5375.26	#NULL!	8683.21	6778.29	#NULL!	8667.06	#NULL!	#NULL!	502	1	1	2	2	8	2	8	2	8	8	2	8	1	8	2	8	2	8	8	8	8	1	1	1
2015.01.07	B943930902	B9439309	2012	2	1	2	B943	2	46	#NULL!	4	4	4	2	4534.24	4938.87	4439.46	#NULL!	4412.89	4541.67	#NULL!	5976.85	#NULL!	#NULL!	502	1	2	8	2	8	2	8	2	8	8	2	8	1	8	2	8	2	8	8	8	8	1	1	1
2015.01.07	B943930903	B9439309	2012	2	1	2	B943	1	21	#NULL!	4	4	3	7	4534.24	10649	#NULL!	#NULL!	20900.6	15626.3	#NULL!	#NULL!	#NULL!	#NULL!	502	1	2	8	2	8	2	8	8	8	8	2	8	1	8	2	8	2	8	8	8	8	1	1	1
2015.01.07	B944912901	B9449129	2012	2	1	1	B944	1	70	#NULL!	1	1	3	7	13327.3	3886.28	11094.4	74560	4000.65	5493	93549.1	11019.4	86667.8	105688	513	1	2	8	2	8	1	2	2	8	8	2	8	3	1	1	2	2	8	8	8	8	1	1	1
2015.01.07	B944912902	B9449129	2012	2	1	1	B944	2	61	#NULL!	1	1	1	7	13327.3	15106.7	9941.49	#NULL!	12911.2	6021.58	#NULL!	9666.13	#NULL!	#NULL!	513	1	2	8	1	1	2	8	1	3	2	2	8	1	8	2	8	1	1	2	2	1	1	1	1
2015.01.07	B944913501	B9449135	2012	2	1	1	B944	1	62	#NULL!	4	4	3	3	13327.3	18643	#NULL!	#NULL!	21071.1	11867.2	#NULL!	#NULL!	#NULL!	#NULL!	513	1	2	8	2	8	2	8	2	8	8	2	8	1	8	2	8	2	8	8	8	8	1	1	1
2015.01.07	B944913502	B9449135	2012	2	1	1	B944	2	60	#NULL!	4	4	2	3	13327.3	18251.4	19883	#NULL!	18974.9	9032.37	#NULL!	19332.3	#NULL!	#NULL!	513	1	2	8	2	8	2	8	2	8	8	2	8	1	8	2	8	2	8	8	8	8	1	1	1
2015.01.07	B944920101	B9449201	2012	2	1	1	B944	2	72	#NULL!	2	1	#NULL!	#NULL!	13327.3	5088.49	#NULL!	#NULL!	4870.43	5933.75	#NULL!	#NULL!	#NULL!	#NULL!	513	1	1	2	1	2	2	8	1	3	2	2	8	1	8	2	8	1	1	1	1	1	1	1	1
2015.01.07	B944921001	B9449210	2012	2	1	1	B944	2	80	#NULL!	2	1	#NULL!	#NULL!	13327.3	7446.91	#NULL!	#NULL!	7818.28	5933.75	#NULL!	#NULL!	#NULL!	#NULL!	513	1	2	8	2	8	2	8	1	3	2	2	8	2	3	2	8	2	8	8	8	8	1	1	1
2015.01.07	B944922201	B9449222	2012	2	1	1	B944	1	73	#NULL!	2	1	3	6	13327.3	3886.28	11094.4	#NULL!	4000.65	5493	#NULL!	11019.4	#NULL!	#NULL!	513	1	2	8	2	8	2	8	2	8	8	2	8	1	8	2	8	2	8	8	8	8	1	1	1
2015.01.07	B944922202	B9449222	2012	2	1	1	B944	2	71	#NULL!	3	1	1	7	13327.3	5088.49	12636	#NULL!	4870.43	5933.75	#NULL!	11906.4	#NULL!	#NULL!	513	1	2	8	2	8	2	8	2	8	8	2	8	1	8	2	8	2	8	8	8	8	1	1	1
2015.01.07	B944929401	B9449294	2012	2	1	1	B944	1	72	#NULL!	1	1	1	7	13327.3	7772.57	22188.9	74560	4000.65	10986	93549.1	22038.8	86667.8	105688	513	1	1	2	2	8	2	8	2	8	8	2	8	1	8	1	1	2	8	8	8	8	1	1	1
2015.01.07	B944931201	B9449312	2012	2	1	1	B944	2	73	#NULL!	2	1	1	6	13327.3	5088.49	12636	84696	4870.43	5933.75	114187	11906.4	94086	126557	513	1	2	8	2	8	2	8	2	8	8	2	8	1	8	2	8	2	8	8	8	8	1	1	1
2015.01.07	B944931801	B9449318	2012	2	1	1	B944	2	64	#NULL!	1	1	1	6	13327.3	15106.7	#NULL!	#NULL!	12911.2	6021.58	#NULL!	#NULL!	#NULL!	#NULL!	513	1	2	8	2	8	1	2	1	2	2	2	8	1	8	2	8	2	8	8	8	8	1	1	1
2015.01.07	B944932402	B9449324	2012	2	1	1	B944	2	80	#NULL!	#NULL!	#NULL!	#NULL!	#NULL!	13327.3	14893.8	#NULL!	#NULL!	#NULL!	#NULL!	#NULL!	#NULL!	#NULL!	#NULL!	513	1	2	8	2	8	2	8	2	8	8	2	8	2	3	2	8	2	8	8	8	8	1	1	1
2015.01.07	B945917702	B9459177	2012	2	1	2	B945	2	37	#NULL!	2	3	4	1	1909.16	2112.88	#NULL!	#NULL!	2196.5	1877.17	#NULL!	#NULL!	#NULL!	#NULL!	502	1	2	8	2	8	2	8	8	8	8	2	8	1	8	2	8	2	8	8	8	8	1	1	1
2015.01.07	B945917703	B9459177	2012	2	1	2	B945	1	2	24	3	3	1	#NULL!	1909.16	1536.47	#NULL!	#NULL!	1720.72	1340.81	#NULL!	#NULL!	#NULL!	#NULL!	502	1	8	8	8	8	8	8	8	8	8	8	8	8	8	8	8	8	8	8	8	8	8	8	8
2015.01.07	B945918001	B9459180	2012	2	1	2	B945	1	48	#NULL!	3	4	4	2	1909.16	8453.71	3132.06	4441.02	8552.58	4336.15	5048.09	4689.2	3785.92	6818.57	502	1	2	8	2	8	2	8	2	8	8	1	2	1	8	2	8	2	8	8	8	8	1	1	1
2015.01.07	B945918002	B9459180	2012	2	1	2	B945	2	44	#NULL!	3	4	3	7	1909.16	1685.29	2078.39	#NULL!	2310.06	1851.7	#NULL!	2209.21	#NULL!	#NULL!	502	1	2	8	2	8	2	8	2	8	8	2	8	1	8	2	8	1	1	2	2	1	1	1	1
2015.01.07	B945918004	B9459180	2012	2	1	2	B945	2	17	#NULL!	3	4	2	7	1909.16	5913.26	#NULL!	4137.4	10329	3180.5	#NULL!	#NULL!	2777.06	#NULL!	502	1	2	8	2	8	2	8	8	8	8	8	8	1	8	2	8	1	2	1	1	2	1	1	1
2015.01.07	B945918301	B9459183	2012	2	1	2	B945	1	33	#NULL!	4	4	4	2	1909.16	9151.92	#NULL!	9650.67	15448.6	8451.2	#NULL!	#NULL!	11766.5	#NULL!	502	1	2	8	2	8	2	8	8	8	8	2	8	1	8	2	8	2	8	8	8	8	1	1	1
2015.01.07	B945918302	B9459183	2012	2	1	2	B945	2	32	#NULL!	4	4	4	2	1909.16	3167.37	#NULL!	#NULL!	3376.81	3271.5	#NULL!	#NULL!	#NULL!	#NULL!	502	1	2	8	2	8	2	8	8	8	8	2	8	1	8	2	8	2	8	8	8	8	1	1	1
2015.01.07	B945918601	B9459186	2012	2	1	2	B945	1	42	#NULL!	3	3	4	3	1909.16	6257.28	3986.92	#NULL!	13508.8	5076.38	#NULL!	6446.57	#NULL!	#NULL!	502	1	2	8	2	8	2	8	2	8	8	2	8	1	8	2	8	2	8	8	8	8	1	1	1
2015.01.07	B945918602	B9459186	2012	2	1	2	B945	2	39	#NULL!	3	3	4	3	1909.16	2112.88	#NULL!	#NULL!	2196.5	1877.17	#NULL!	#NULL!	#NULL!	#NULL!	502	1	2	8	2	8	2	8	8	8	8	2	8	1	8	2	8	2	8	8	8	8	1	1	1
2015.01.07	B945918603	B9459186	2012	2	1	2	B945	1	6	79	3	3	1	#NULL!	1909.16	1121.27	#NULL!	#NULL!	1105.65	1407.21	#NULL!	#NULL!	#NULL!	#NULL!	502	1	1	2	2	8	1	2	8	8	8	8	8	8	8	8	8	2	8	8	8	8	1	1	1
2015.01.07	B945918605	B9459186	2012	2	1	2	B945	2	71	#NULL!	4	3	2	7	1909.16	728.932	1372.8	38082.9	779.777	950.017	31261.5	1509.12	33217.9	30108.2	502	1	2	8	2	8	2	8	1	3	2	2	8	1	8	2	8	2	8	8	8	8	1	1	1
2015.01.07	B945919501	B9459195	2012	2	1	2	B945	2	66	#NULL!	2	1	1	6	1909.16	2048.97	907.986	1075.56	2464.85	807.439	1101.07	1005.21	1069.46	1153.14	502	1	2	8	2	8	2	8	1	3	2	2	8	1	8	2	8	2	8	8	8	8	1	1	1
2015.01.07	B945920101	B9459201	2012	2	1	2	B945	1	53	#NULL!	2	3	3	7	1909.16	2364.31	2845.72	2264.41	#NULL!	#NULL!	2411.7	#NULL!	#NULL!	#NULL!	502	1	2	8	2	8	2	8	2	8	8	1	1	1	8	2	8	2	8	8	8	8	1	1	1
2015.01.07	B945920102	B9459201	2012	2	1	2	B945	2	47	#NULL!	2	3	4	2	1909.16	2079.53	2350.3	2292.84	#NULL!	#NULL!	2731.77	#NULL!	#NULL!	#NULL!	502	1	2	8	2	8	2	8	2	8	8	2	8	1	8	2	8	2	8	8	8	8	1	1	1
2015.01.07	B945920103	B9459201	2012	2	1	2	B945	1	16	#NULL!	2	3	2	7	1909.16	2693.49	#NULL!	#NULL!	#NULL!	#NULL!	#NULL!	#NULL!	#NULL!	#NULL!	502	1	2	8	2	8	2	8	8	8	8	8	8	1	8	2	8	2	8	8	8	8	1	1	1
2015.01.07	B945920701	B9459207	2012	2	1	2	B945	1	52	#NULL!	4	4	4	1	1909.16	2364.31	2845.72	3396.62	4086.22	3189.78	4823.41	3823.7	3336.19	5361.07	502	1	2	8	2	8	2	8	1	3	2	2	8	1	8	2	8	2	8	8	8	8	1	1	1
2015.01.07	B945920702	B9459207	2012	2	1	2	B945	2	52	#NULL!	4	4	3	3	1909.16	2149.89	1698.58	#NULL!	1921.12	1522.97	#NULL!	2006.08	#NULL!	#NULL!	502	1	2	8	2	8	2	8	2	8	8	2	8	1	8	2	8	2	8	8	8	8	1	1	1
2015.01.07	B945920703	B9459207	2012	2	1	2	B945	1	25	#NULL!	4	4	3	7	1909.16	12929.7	#NULL!	2613.33	10064.4	5691.11	#NULL!	#NULL!	3525.53	#NULL!	502	1	2	8	2	8	2	8	8	8	8	2	8	1	8	2	8	2	8	8	8	8	1	1	1
2015.01.07	B945921301	B9459213	2012	2	1	2	B945	1	64	#NULL!	3	4	1	5	1909.16	2380.46	1343.7	3496.94	3467.38	1266.66	2644.89	1632.35	3550.25	2976.23	502	1	2	8	2	8	2	8	2	8	8	2	8	1	8	2	8	2	8	8	8	8	1	1	1
2015.01.07	B945921302	B9459213	2012	2	1	2	B945	2	63	#NULL!	4	4	1	3	1909.16	2164.05	1080.06	#NULL!	2067.13	964.079	#NULL!	1225.17	#NULL!	#NULL!	502	1	2	8	2	8	2	8	1	2	2	2	8	1	8	1	3	2	8	8	8	8	2	2	1
2015.01.07	B945921303	B9459213	2012	2	1	2	B945	1	32	#NULL!	3	4	4	1	1909.16	6101.28	#NULL!	#NULL!	10299.1	5634.13	#NULL!	#NULL!	#NULL!	#NULL!	502	1	2	8	2	8	2	8	8	8	8	2	8	1	8	2	8	2	8	8	8	8	1	1	1
2015.01.07	B945922201	B9459222	2012	2	1	2	B945	1	76	#NULL!	3	2	3	7	1909.16	1986.76	1205.32	#NULL!	1756.09	879.451	#NULL!	1396.7	#NULL!	#NULL!	502	1	2	8	2	8	2	8	2	8	8	2	8	1	8	2	8	2	8	8	8	8	1	1	1
2015.01.07	B945922202	B9459222	2012	2	1	2	B945	2	72	#NULL!	3	2	1	7	1909.16	728.932	1372.8	#NULL!	779.777	950.017	#NULL!	1509.12	#NULL!	#NULL!	502	1	2	8	2	8	2	8	1	3	2	2	8	1	8	1	1	1	1	1	1	2	1	1	1
2015.01.07	B945923102	B9459231	2012	2	1	2	B945	2	54	#NULL!	3	3	#NULL!	#NULL!	1909.16	8599.57	3397.16	#NULL!	#NULL!	#NULL!	#NULL!	#NULL!	#NULL!	#NULL!	502	1	2	8	2	8	2	8	2	8	8	2	8	1	8	2	8	2	8	8	8	8	1	1	1
2015.01.07	B945923701	B9459237	2012	2	1	2	B945	1	57	#NULL!	3	4	4	2	1909.16	2528.6	1959.63	#NULL!	2860.14	2007.08	#NULL!	2362.73	#NULL!	#NULL!	502	1	2	8	2	8	2	8	2	8	8	2	8	2	3	2	8	2	8	8	8	8	1	1	1
2015.01.07	B945923702	B9459237	2012	2	1	2	B945	2	54	#NULL!	3	4	3	2	1909.16	2149.89	1698.58	3673.61	1921.12	1522.97	4298.78	2006.08	3831.33	4896.75	502	1	2	8	2	8	2	8	1	3	2	2	8	1	8	2	8	2	8	8	8	8	1	1	1
2015.01.07	B945923703	B9459237	2012	2	1	2	B945	2	24	#NULL!	4	4	4	2	1909.16	1564.67	#NULL!	3638.79	1558.79	2624.39	#NULL!	#NULL!	3678.21	#NULL!	502	1	2	8	2	8	2	8	8	8	8	2	8	1	8	2	8	2	8	8	8	8	1	1	1
2015.01.07	B945923704	B9459237	2012	2	1	2	B945	1	22	#NULL!	4	4	3	7	1909.16	4483.78	#NULL!	#NULL!	9835.58	7353.55	#NULL!	#NULL!	#NULL!	#NULL!	502	1	2	8	2	8	2	8	8	8	8	2	8	1	8	2	8	1	1	2	2	1	1	1	1
2015.01.07	B945924601	B9459246	2012	2	1	2	B945	1	34	#NULL!	2	3	4	1	1909.16	6101.28	#NULL!	6433.78	10299.1	5634.13	#NULL!	#NULL!	7844.36	#NULL!	502	1	2	8	2	8	2	8	8	8	8	2	8	1	8	2	8	1	1	2	2	1	1	1	1
2015.01.07	B945924602	B9459246	2012	2	1	2	B945	2	30	#NULL!	2	3	4	7	1909.16	2111.58	#NULL!	#NULL!	2251.21	2181	#NULL!	#NULL!	#NULL!	#NULL!	502	1	2	8	2	8	2	8	8	8	8	2	8	1	8	2	8	2	8	8	8	8	1	1	1
2015.01.07	B945924603	B9459246	2012	2	1	2	B945	1	3	44	2	3	1	#NULL!	1909.16	1536.47	#NULL!	#NULL!	1720.72	1340.81	#NULL!	#NULL!	#NULL!	#NULL!	502	1	8	8	8	8	8	8	8	8	8	8	8	8	8	8	8	8	8	8	8	8	8	8	8
2015.01.07	B945925501	B9459255	2012	2	1	2	B945	1	65	#NULL!	2	2	1	7	1909.16	1925.97	1208.82	2083.94	2021.81	1043.98	2795.59	1352.43	2099.7	3048.45	502	1	2	8	2	8	2	8	1	3	2	2	8	2	3	2	8	2	8	8	8	8	1	1	1
2015.01.07	B945925502	B9459255	2012	2	1	2	B945	2	64	#NULL!	2	2	1	7	1909.16	2164.05	1080.06	#NULL!	2067.13	964.079	#NULL!	1225.17	#NULL!	#NULL!	502	1	2	8	2	8	2	8	2	8	8	2	8	1	8	2	8	2	8	8	8	8	1	1	1
2015.01.07	B945928502	B9459285	2012	2	1	2	B945	2	38	#NULL!	2	2	3	2	1909.16	3169.32	#NULL!	6532.24	3294.76	2346.47	#NULL!	#NULL!	5797.87	#NULL!	502	1	2	8	2	8	2	8	8	8	8	2	8	1	8	2	8	2	8	8	8	8	1	1	1
2015.01.07	B945928503	B9459285	2012	2	1	2	B945	2	5	70	2	2	1	#NULL!	1909.16	2722.18	#NULL!	#NULL!	3353.93	2256.16	#NULL!	#NULL!	#NULL!	#NULL!	502	1	2	8	1	2	2	8	8	8	8	8	8	8	8	8	8	8	8	8	8	8	8	8	8
2015.01.07	B945928504	B9459285	2012	2	1	2	B945	1	1	13	2	2	1	#NULL!	1909.16	1536.47	#NULL!	#NULL!	1720.72	1676.01	#NULL!	#NULL!	#NULL!	#NULL!	502	1	8	8	8	8	8	8	8	8	8	8	8	8	8	8	8	8	8	8	8	8	8	8	8
2015.01.07	B945928801	B9459288	2012	2	1	2	B945	1	63	#NULL!	4	4	3	2	1909.16	3570.7	1343.7	#NULL!	5201.08	1899.99	#NULL!	1632.35	#NULL!	#NULL!	502	1	2	8	2	8	2	8	1	2	2	2	8	1	8	2	8	2	8	8	8	8	1	2	1
2015.01.07	B945928802	B9459288	2012	2	1	2	B945	2	59	#NULL!	4	4	4	1	1909.16	5018.39	1326.94	5416.99	3834.33	1913.45	4040.81	1551.33	5251.31	4356.62	502	1	2	8	1	2	2	8	1	3	2	1	2	1	8	2	8	2	8	8	8	8	1	1	1
2015.01.07	B945929101	B9459291	2012	2	1	2	B945	1	50	#NULL!	4	4	#NULL!	#NULL!	1909.16	2364.31	#NULL!	#NULL!	#NULL!	#NULL!	#NULL!	#NULL!	#NULL!	#NULL!	502	1	2	8	2	8	2	8	2	8	8	2	8	1	8	2	8	2	8	8	8	8	1	1	1
2015.01.07	B945929102	B9459291	2012	2	1	2	B945	2	46	#NULL!	4	4	3	7	1909.16	2079.53	4700.61	3439.26	2768.87	2849.68	5463.54	5273.69	4181.14	6065.7	502	1	2	8	2	8	2	8	2	8	8	2	8	1	8	2	8	2	8	8	8	8	1	1	1
2015.01.07	B945929103	B9459291	2012	2	1	2	B945	2	22	#NULL!	4	4	4	1	1909.16	1564.67	#NULL!	2729.09	2078.38	3499.19	#NULL!	#NULL!	3678.21	#NULL!	502	1	2	8	2	8	2	8	8	8	8	1	2	1	8	2	8	2	8	8	8	8	1	1	1
2015.01.07	B945929105	B9459291	2012	2	1	2	B945	1	14	#NULL!	4	4	1	#NULL!	1909.16	3469.14	#NULL!	#NULL!	3404.14	2404.74	#NULL!	#NULL!	#NULL!	#NULL!	502	1	2	8	2	8	2	8	8	8	8	8	8	1	8	2	8	2	8	8	8	8	1	1	1
2015.01.07	B945930902	B9459309	2012	2	1	2	B945	2	37	#NULL!	4	4	4	7	1909.16	4225.76	#NULL!	4354.82	3294.76	2502.9	#NULL!	#NULL!	2898.94	#NULL!	502	1	2	8	2	8	2	8	8	8	8	2	8	1	8	1	1	2	8	8	8	8	1	1	1
2015.01.07	B945930903	B9459309	2012	2	1	2	B945	1	12	#NULL!	4	4	1	#NULL!	1909.16	3469.14	#NULL!	3310.77	3829.66	2404.74	#NULL!	#NULL!	1946.06	#NULL!	502	1	2	8	2	8	2	8	8	8	8	8	8	1	8	2	8	1	2	2	2	1	1	2	1
2015.01.07	B945930904	B9459309	2012	2	1	2	B945	2	8	#NULL!	4	4	1	#NULL!	1909.16	2722.18	#NULL!	#NULL!	3353.93	2406.57	#NULL!	#NULL!	#NULL!	#NULL!	502	1	2	8	2	8	2	8	8	8	8	8	8	8	8	8	8	1	1	1	1	1	1	1	1
2015.01.07	B945931201	B9459312	2012	2	1	2	B945	1	73	#NULL!	1	1	1	7	1909.16	835.072	#NULL!	#NULL!	960.781	1319.18	#NULL!	#NULL!	#NULL!	#NULL!	502	1	2	8	2	8	2	8	2	8	8	2	8	2	3	2	8	2	8	8	8	8	1	1	1
2015.01.07	B945931202	B9459312	2012	2	1	2	B945	2	72	#NULL!	2	1	1	7	1909.16	1093.4	2745.59	#NULL!	1169.67	1425.03	#NULL!	3018.25	#NULL!	#NULL!	502	1	2	8	2	8	2	8	1	3	2	2	8	1	8	2	8	2	8	8	8	8	1	1	1
2015.01.07	B945931501	B9459315	2012	2	1	2	B945	1	48	#NULL!	4	4	4	2	1909.16	8453.71	6264.11	#NULL!	8552.58	4336.15	#NULL!	9378.41	#NULL!	#NULL!	502	1	2	8	2	8	2	8	2	8	8	2	8	1	8	2	8	2	8	8	8	8	1	1	1
2015.01.07	B945931503	B9459315	2012	2	1	2	B945	1	17	#NULL!	4	4	2	7	1909.16	2693.49	#NULL!	8234.72	3283.98	3215.3	#NULL!	#NULL!	8948.19	#NULL!	502	1	2	8	2	8	2	8	8	8	8	8	8	1	8	2	8	2	8	8	8	8	1	1	1
2015.01.07	B945931504	B9459315	2012	2	1	2	B945	1	15	#NULL!	4	4	2	7	1909.16	2693.49	#NULL!	#NULL!	3283.98	3215.3	#NULL!	#NULL!	#NULL!	#NULL!	502	1	2	8	2	8	2	8	8	8	8	8	8	1	8	2	8	2	8	8	8	8	1	1	1
2015.01.07	B946908701	B9469087	2012	2	1	2	B946	1	46	#NULL!	2	3	4	2	4197.41	18586.1	11275.4	10791.7	21030.2	10662.3	15144.3	14469.5	35777	18410.1	502	1	2	8	2	8	2	8	2	8	8	2	8	1	8	2	8	1	1	2	1	2	1	1	1
2015.01.07	B946908703	B9469087	2012	2	1	2	B946	2	19	#NULL!	2	3	3	7	4197.41	11404.1	#NULL!	14362.7	#NULL!	#NULL!	#NULL!	#NULL!	#NULL!	#NULL!	502	1	2	8	1	2	2	8	8	8	8	2	8	1	8	2	8	2	8	8	8	8	1	1	1
2015.01.07	B946908704	B9469087	2012	2	1	2	B946	2	14	#NULL!	2	3	1	#NULL!	4197.41	6028.54	#NULL!	#NULL!	8182.94	3950.27	#NULL!	#NULL!	#NULL!	#NULL!	502	1	2	8	1	2	2	8	8	8	8	8	8	1	8	2	8	2	8	8	8	8	1	1	1
2015.01.07	B946908705	B9469087	2012	2	1	2	B946	1	12	#NULL!	2	3	1	#NULL!	4197.41	6244.46	#NULL!	#NULL!	6277.9	4434.82	#NULL!	#NULL!	#NULL!	#NULL!	502	1	2	8	2	8	2	8	8	8	8	8	8	1	8	2	8	2	8	8	8	8	1	1	1
2015.01.07	B946909601	B9469096	2012	2	1	2	B946	1	62	#NULL!	4	4	4	2	4197.41	5233.62	2418.65	#NULL!	6820.84	2491.7	#NULL!	2518.48	#NULL!	#NULL!	502	1	2	8	2	8	2	8	2	8	8	2	8	1	8	2	8	2	8	8	8	8	1	1	1
2015.01.07	B946909602	B9469096	2012	2	1	2	B946	2	62	#NULL!	4	4	4	7	4197.41	4757.81	1944.12	#NULL!	4066.35	1896.48	#NULL!	1890.27	#NULL!	#NULL!	502	1	2	8	2	8	2	8	2	8	8	2	8	1	8	2	8	2	8	8	8	8	1	1	1
2015.01.07	B946913501	B9469135	2012	2	1	2	B946	1	40	#NULL!	2	3	4	1	4197.41	13757.1	7176.45	8233.91	24282	9985.97	9538.58	9946.14	10088.8	13343.9	502	1	2	8	2	8	2	8	2	8	8	2	8	1	8	2	8	2	8	8	8	8	1	1	1
2015.01.07	B946913502	B9469135	2012	2	1	2	B946	2	30	#NULL!	2	3	4	7	4197.41	4642.45	#NULL!	7303.53	4428.45	4290.34	#NULL!	#NULL!	6543.65	#NULL!	502	1	2	8	1	1	2	8	8	8	8	2	8	1	8	2	8	1	1	1	1	1	1	1	1
2015.01.07	B946913503	B9469135	2012	2	1	2	B946	2	4	53	3	3	1	#NULL!	4197.41	7577.36	#NULL!	#NULL!	7078.74	3531	#NULL!	#NULL!	#NULL!	#NULL!	502	1	2	8	1	2	2	8	8	8	8	8	8	8	8	8	8	8	8	8	8	8	8	8	8
2015.01.07	B946913504	B9469135	2012	2	1	2	B946	2	2	26	3	3	1	#NULL!	4197.41	7577.36	#NULL!	#NULL!	4719.16	3531	#NULL!	#NULL!	#NULL!	#NULL!	502	1	8	8	8	8	8	8	8	8	8	8	8	8	8	8	8	8	8	8	8	8	8	8	8
2015.01.07	B946913802	B9469138	2012	2	1	2	B946	2	47	#NULL!	4	4	3	7	4197.41	9143.97	8461.09	29715.2	5106.35	7007.16	16390.6	8136.55	14816.9	16377.4	502	1	2	8	2	8	2	8	2	8	8	2	8	1	8	2	8	1	1	1	1	2	1	1	1
2015.01.07	B946913804	B9469138	2012	2	1	2	B946	2	20	#NULL!	4	4	3	7	4197.41	6880.1	#NULL!	#NULL!	3832.94	8604.26	#NULL!	#NULL!	#NULL!	#NULL!	502	1	2	8	1	2	2	8	8	8	8	2	8	1	8	2	8	1	1	1	1	2	1	1	1
2015.01.07	B946913805	B9469138	2012	2	1	2	B946	1	18	#NULL!	4	4	3	7	4197.41	4848.28	#NULL!	8893.5	8075.06	10541.6	#NULL!	#NULL!	15855.1	#NULL!	502	1	2	8	2	8	2	8	8	8	8	8	8	1	8	2	8	2	8	8	8	8	1	1	1
2015.01.07	B946915601	B9469156	2012	2	1	2	B946	2	53	#NULL!	1	2	3	7	4197.41	4726.69	3057.44	8926.88	3779.11	2995.89	6448.17	3095.1	8146.36	6610.62	502	1	2	8	2	8	2	8	2	8	8	2	8	1	8	1	1	2	8	8	8	8	1	1	1
2015.01.07	B946915602	B9469156	2012	2	1	2	B946	1	28	#NULL!	1	2	4	3	4197.41	26964.6	#NULL!	#NULL!	19798.2	11195.2	#NULL!	#NULL!	#NULL!	#NULL!	502	1	2	8	2	8	2	8	8	8	8	2	8	1	8	2	8	2	8	8	8	8	1	1	1
2015.01.07	B946915603	B9469156	2012	2	1	2	B946	1	24	#NULL!	1	2	3	3	4197.41	9857.92	#NULL!	10416.9	19348	14465.5	#NULL!	#NULL!	11624.4	#NULL!	502	1	2	8	2	8	2	8	8	8	8	2	8	1	8	2	8	1	1	2	1	2	1	1	1
2015.01.07	B946916501	B9469165	2012	2	1	2	B946	1	74	#NULL!	3	2	#NULL!	#NULL!	4197.41	1223.98	#NULL!	#NULL!	1260	1730.01	#NULL!	#NULL!	#NULL!	#NULL!	502	1	2	8	2	8	2	8	2	8	8	2	8	3	2	2	8	2	8	8	8	8	1	1	1
2015.01.07	B946916502	B9469165	2012	2	1	2	B946	2	71	#NULL!	4	2	2	6	4197.41	1602.61	4942.07	#NULL!	1533.93	1868.82	#NULL!	4656.72	#NULL!	#NULL!	502	1	2	8	2	8	2	8	2	8	8	2	8	1	8	2	8	2	8	8	8	8	1	1	1
2015.01.07	B946920702	B9469207	2012	2	1	2	B946	2	43	#NULL!	4	4	3	7	4197.41	7410.45	7482.21	#NULL!	6816.33	5463.83	#NULL!	6817	#NULL!	#NULL!	502	1	1	2	2	8	2	8	2	8	8	2	8	1	8	2	8	2	8	8	8	8	1	1	1
2015.01.07	B946920703	B9469207	2012	2	1	2	B946	1	14	#NULL!	4	4	1	#NULL!	4197.41	6244.46	#NULL!	#NULL!	7533.48	5321.78	#NULL!	#NULL!	#NULL!	#NULL!	502	1	2	8	2	8	2	8	8	8	8	8	8	1	8	2	8	2	8	8	8	8	1	1	1
2015.01.07	B946923401	B9469234	2012	2	1	2	B946	1	65	#NULL!	4	3	1	1	4197.41	6351.59	#NULL!	10128	5965.79	3080.5	#NULL!	#NULL!	8928.97	#NULL!	502	1	2	8	2	8	2	8	2	8	8	2	8	1	8	2	8	2	8	8	8	8	1	1	1
2015.01.07	B946923402	B9469234	2012	2	1	2	B946	2	61	#NULL!	4	3	1	7	4197.41	7136.72	5832.35	#NULL!	6099.52	2844.72	#NULL!	5670.8	#NULL!	#NULL!	502	1	2	8	2	8	2	8	2	8	8	1	2	1	8	1	2	1	1	1	1	2	1	1	1
2015.01.07	B946925203	B9469252	2012	2	1	2	B946	2	18	#NULL!	4	4	2	7	4197.41	10643.9	#NULL!	8936.79	20318.7	9384.73	#NULL!	#NULL!	15745.9	#NULL!	502	1	2	8	1	2	2	8	8	8	8	8	8	1	8	2	8	1	1	1	1	1	1	1	1
2015.01.07	B946927001	B9469270	2012	2	1	2	B946	1	71	#NULL!	3	3	2	7	4197.41	1223.98	2169.58	#NULL!	1260	1730.01	#NULL!	2154.91	#NULL!	#NULL!	502	1	2	8	2	8	2	8	2	8	8	2	8	1	8	2	8	2	8	8	8	8	1	1	1
2015.01.07	B946927002	B9469270	2012	2	1	2	B946	2	65	#NULL!	3	3	2	7	4197.41	4504.8	1634.37	6969.63	4848.72	1588.35	6606.4	1550.89	6063.84	6226.96	502	1	2	8	2	8	2	8	2	8	8	2	8	1	8	2	8	2	8	8	8	8	1	1	1
2015.01.07	B946927901	B9469279	2012	2	1	2	B946	1	54	#NULL!	4	4	3	2	4197.41	5198.1	5122.3	14673.4	8038.17	6274.76	14470.2	5899.43	9458.1	14474.9	502	1	2	8	2	8	2	8	1	3	2	2	8	1	8	1	1	2	8	8	8	8	1	1	1
2015.01.07	B946927902	B9469279	2012	2	1	2	B946	2	54	#NULL!	4	4	3	5	4197.41	4726.69	3057.44	#NULL!	3779.11	2995.89	#NULL!	3095.1	#NULL!	#NULL!	502	1	2	8	2	8	2	8	2	8	8	2	8	1	8	2	8	2	8	8	8	8	1	1	1
2015.01.07	B946927904	B9469279	2012	2	1	2	B946	1	18	#NULL!	4	4	3	3	4197.41	4848.28	#NULL!	8893.5	6460.05	6324.96	#NULL!	#NULL!	9513.05	#NULL!	502	1	2	8	2	8	2	8	8	8	8	8	8	1	8	2	8	2	8	8	8	8	1	1	1
2015.01.07	B946929702	B9469297	2012	2	1	2	B946	2	49	#NULL!	3	3	3	6	4197.41	6857.98	8461.09	#NULL!	8170.16	8408.59	#NULL!	8136.55	#NULL!	#NULL!	502	1	2	8	2	8	2	8	2	8	8	2	8	1	8	2	8	1	1	1	1	2	1	1	1
2015.01.07	B946929704	B9469297	2012	2	1	2	B946	1	17	#NULL!	3	3	2	7	4197.41	4848.28	#NULL!	#NULL!	12920.1	12649.9	#NULL!	#NULL!	#NULL!	#NULL!	502	1	1	2	1	2	2	8	8	8	8	8	8	1	8	1	1	1	2	2	1	1	1	1	1
2015.01.07	B946931502	B9469315	2012	2	1	2	B946	2	52	#NULL!	3	4	3	3	4197.41	14180.1	6114.88	#NULL!	11337.3	8987.68	#NULL!	6190.2	#NULL!	#NULL!	502	1	2	8	2	8	2	8	2	8	8	2	8	1	8	1	1	2	8	8	8	8	1	1	1
2015.01.07	B947907801	B9479078	2012	2	1	1	B947	1	37	#NULL!	2	3	4	5	10024.1	15763.5	#NULL!	#NULL!	19379.2	18330	#NULL!	#NULL!	#NULL!	#NULL!	513	1	2	8	1	2	2	8	8	8	8	2	8	1	8	2	8	1	1	1	1	2	1	1	1
2015.01.07	B947908701	B9479087	2012	2	1	1	B947	2	24	#NULL!	1	2	3	1	10024.1	8215.41	#NULL!	21116.8	8449.58	14225.8	#NULL!	#NULL!	23717.3	#NULL!	513	1	2	8	2	8	2	8	8	8	8	2	8	1	8	1	1	2	8	8	8	8	1	1	1
2015.01.07	B947908702	B9479087	2012	2	1	1	B947	2	20	#NULL!	1	2	3	7	10024.1	8215.41	#NULL!	#NULL!	8449.58	14225.8	#NULL!	#NULL!	#NULL!	#NULL!	513	1	2	8	2	8	2	8	8	8	8	2	8	1	8	2	8	1	1	2	1	1	1	1	1
2015.01.07	B947909901	B9479099	2012	2	1	1	B947	2	29	#NULL!	4	4	4	1	10024.1	13631.1	#NULL!	#NULL!	#NULL!	#NULL!	#NULL!	#NULL!	#NULL!	#NULL!	513	1	2	8	1	2	2	8	8	8	8	2	8	1	8	2	8	1	2	1	1	2	1	1	1
2015.01.07	B947912601	B9479126	2012	2	1	1	B947	2	32	#NULL!	3	3	4	1	10024.1	11087	#NULL!	#NULL!	12202.9	11822.4	#NULL!	#NULL!	#NULL!	#NULL!	513	1	2	8	2	8	2	8	8	8	8	2	8	1	8	2	8	2	8	8	8	8	1	1	1
2015.01.07	B947913201	B9479132	2012	2	1	1	B947	2	31	#NULL!	3	3	4	1	10024.1	11087	#NULL!	#NULL!	12202.9	11822.4	#NULL!	#NULL!	#NULL!	#NULL!	513	1	2	8	1	1	2	8	8	8	8	2	8	1	8	2	8	1	1	1	1	2	1	1	1
2015.01.07	B947914101	B9479141	2012	2	1	1	B947	2	24	#NULL!	1	2	3	7	10024.1	8215.41	#NULL!	#NULL!	8449.58	14225.8	#NULL!	#NULL!	#NULL!	#NULL!	513	1	1	2	2	8	2	8	8	8	8	2	8	2	3	1	1	1	1	1	1	2	1	1	1
2015.01.07	B947914102	B9479141	2012	2	1	1	B947	1	22	#NULL!	1	2	3	7	10024.1	19086.1	#NULL!	24877.2	26922.3	29528.7	#NULL!	#NULL!	35252.1	#NULL!	513	1	2	8	2	8	2	8	8	8	8	2	8	1	8	2	8	2	8	8	8	8	1	1	1
2015.01.07	B947915601	B9479156	2012	2	1	1	B947	2	24	#NULL!	2	3	4	2	10024.1	8215.41	#NULL!	10558.4	8449.58	14225.8	#NULL!	#NULL!	11858.6	#NULL!	513	1	2	8	1	2	2	8	8	8	8	2	8	1	8	2	8	1	1	2	1	1	1	1	1
2015.01.07	B947918601	B9479186	2012	2	1	1	B947	2	43	#NULL!	1	2	3	6	10024.1	8848.7	9404.61	12724.1	12521.9	10037.3	10159.8	10282.2	25334.2	11330.4	513	1	2	8	2	8	1	9	1	3	2	2	8	1	8	2	8	1	1	1	1	2	1	1	1
2015.01.07	B947918602	B9479186	2012	2	1	1	B947	2	14	#NULL!	1	2	1	#NULL!	10024.1	12178.1	#NULL!	#NULL!	18039	8708.23	#NULL!	#NULL!	#NULL!	#NULL!	513	1	2	8	2	8	2	8	8	8	8	8	8	1	8	2	8	1	1	2	2	2	1	1	1
2015.01.07	B947919801	B9479198	2012	2	1	1	B947	2	31	#NULL!	4	4	4	1	10024.1	11087	#NULL!	13081.5	12202.9	11822.4	#NULL!	#NULL!	14883.2	#NULL!	513	1	2	8	2	8	2	8	8	8	8	2	8	2	3	1	2	2	8	8	8	8	1	1	1
2015.01.07	B947925801	B9479258	2012	2	1	1	B947	1	58	#NULL!	4	4	3	1	10024.1	13276.6	8867.21	#NULL!	#NULL!	#NULL!	#NULL!	#NULL!	#NULL!	#NULL!	513	1	2	8	2	8	2	8	2	8	8	1	2	1	8	1	2	2	8	8	8	8	1	1	1
2015.01.07	B947925802	B9479258	2012	2	1	1	B947	2	56	#NULL!	4	4	1	7	10024.1	17566.2	6004.35	20957.4	22112.1	13829.4	15672.4	14440.5	22573.8	19009.4	513	1	2	8	2	8	2	8	1	3	2	2	8	1	8	2	8	2	8	8	8	8	1	1	1
2015.01.07	B947926701	B9479267	2012	2	1	1	B947	1	59	#NULL!	4	4	1	5	10024.1	13276.6	8867.21	8812	15503.7	10879.6	6095.02	10996.7	9769.77	7200.46	513	1	2	8	2	8	2	8	1	3	2	2	8	2	3	2	8	2	8	8	8	8	1	1	1
2015.01.07	B947927301	B9479273	2012	2	1	1	B947	1	71	#NULL!	2	2	1	6	10024.1	2923.06	5454.02	#NULL!	#NULL!	#NULL!	#NULL!	#NULL!	#NULL!	#NULL!	513	1	2	8	2	8	2	8	2	8	8	2	8	2	3	1	2	1	1	1	2	2	1	1	1
2015.01.07	B947927302	B9479273	2012	2	1	1	B947	2	69	#NULL!	2	2	1	3	10024.1	10758.2	4108.59	12483.5	#NULL!	#NULL!	8541.03	#NULL!	#NULL!	#NULL!	513	1	2	8	2	8	2	8	1	2	2	2	8	1	8	2	8	1	1	2	1	2	1	1	1
2015.01.07	B947927601	B9479276	2012	2	1	1	B947	1	58	#NULL!	1	2	2	5	10024.1	13276.6	8867.21	#NULL!	15503.7	10879.6	#NULL!	10996.7	#NULL!	#NULL!	513	1	2	8	2	8	2	8	1	3	2	2	8	1	8	2	8	2	8	8	8	8	1	1	1
2015.01.07	B947927602	B9479276	2012	2	1	1	B947	2	49	#NULL!	1	2	3	2	10024.1	10918.7	10635	#NULL!	11256.7	11585.3	#NULL!	12272.5	#NULL!	#NULL!	513	1	2	8	2	8	2	8	1	3	1	2	8	1	8	1	2	2	8	8	8	8	1	1	1
2015.01.07	B947927603	B9479276	2012	2	1	1	B947	2	23	#NULL!	1	2	4	7	10024.1	8215.41	#NULL!	#NULL!	8449.58	14225.8	#NULL!	#NULL!	#NULL!	#NULL!	513	1	2	8	2	8	2	8	8	8	8	2	8	1	8	1	1	2	8	8	8	8	1	1	1
2015.01.07	B947930601	B9479306	2012	2	1	1	B947	1	34	#NULL!	1	2	3	5	10024.1	20293.5	#NULL!	18668.4	24705.7	24829.6	#NULL!	#NULL!	25290.4	#NULL!	513	1	1	1	1	1	2	8	8	8	8	2	8	1	8	2	8	1	2	2	1	2	1	2	1
2015.01.07	B947930602	B9479306	2012	2	1	1	B947	2	28	#NULL!	1	2	3	7	10024.1	13631.1	#NULL!	9647.2	17825.2	13623.8	#NULL!	#NULL!	11640.2	#NULL!	513	1	2	8	2	8	2	8	8	8	8	2	8	1	8	2	8	1	1	1	1	2	1	1	1
2015.01.07	B947930603	B9479306	2012	2	1	1	B947	2	3	44	2	2	1	#NULL!	10024.1	6803.01	#NULL!	#NULL!	6355.34	9729.95	#NULL!	#NULL!	#NULL!	#NULL!	513	1	8	8	8	8	8	8	8	8	8	8	8	8	8	8	8	8	8	8	8	8	8	8	8
2015.01.07	B947932401	B9479324	2012	2	1	1	B947	1	62	#NULL!	3	3	4	1	10024.1	12498.8	6080.15	6764.52	18795.4	6866.07	5129.14	7597.32	7630.73	6493.16	513	1	2	8	2	8	2	8	2	8	8	2	8	2	3	2	8	2	8	8	8	8	1	1	1
2015.01.07	B948905403	B9489054	2012	2	1	1	B948	1	71	#NULL!	3	2	3	7	11148	6501.56	11322.3	#NULL!	10811.6	14844.6	#NULL!	12651.4	#NULL!	#NULL!	513	1	1	2	2	8	2	8	1	1	2	2	8	1	8	2	8	2	8	8	8	8	1	1	1
2015.01.07	B948906605	B9489066	2012	2	1	1	B948	2	77	#NULL!	3	2	#NULL!	#NULL!	11148	15572.9	12895.5	84696	17607.1	13363.1	114187	13669.8	94086	126557	513	1	2	8	2	8	2	8	2	8	8	2	8	1	8	1	1	2	8	8	8	8	1	1	1
2015.01.07	B948906606	B9489066	2012	2	1	1	B948	1	50	#NULL!	1	2	3	3	11148	19275.7	26731.5	37888.8	23325	21796.1	29127.2	30637.8	41866.6	36420.7	513	1	2	8	2	8	2	8	2	8	8	2	8	1	8	2	8	2	8	8	8	8	1	1	1
2015.01.07	B948908701	B9489087	2012	2	1	1	B948	1	35	#NULL!	4	4	4	2	11148	17530.8	#NULL!	29868.8	20115.2	19026.1	#NULL!	#NULL!	36063.1	#NULL!	513	1	2	8	2	8	2	8	8	8	8	2	8	1	8	2	8	2	8	8	8	8	1	1	1
2015.01.07	B948908702	B9489087	2012	2	1	1	B948	2	31	#NULL!	4	4	4	1	11148	12330	#NULL!	#NULL!	12666.3	12271.3	#NULL!	#NULL!	#NULL!	#NULL!	513	1	2	8	2	8	2	8	8	8	8	1	1	1	8	2	8	1	1	2	1	2	1	1	1
2015.01.07	B948908703	B9489087	2012	2	1	1	B948	1	2	28	4	4	1	#NULL!	11148	9278.3	#NULL!	#NULL!	15586.4	7544.02	#NULL!	#NULL!	#NULL!	#NULL!	513	1	8	8	8	8	8	8	8	8	8	8	8	8	8	8	8	8	8	8	8	8	8	8	8
2015.01.07	B948909301	B9489093	2012	2	1	1	B948	1	37	#NULL!	2	3	4	5	11148	17530.8	#NULL!	#NULL!	20115.2	19026.1	#NULL!	#NULL!	#NULL!	#NULL!	513	1	2	8	2	8	2	8	8	8	8	2	8	1	8	2	8	2	8	8	8	8	1	1	1
2015.01.07	B948909302	B9489093	2012	2	1	1	B948	2	34	#NULL!	2	3	4	2	11148	12330	#NULL!	30174	12666.3	12271.3	#NULL!	#NULL!	34758.8	#NULL!	513	1	2	8	2	8	2	8	8	8	8	2	8	1	8	2	8	2	8	8	8	8	1	1	1
2015.01.07	B948909303	B9489093	2012	2	1	1	B948	1	7	#NULL!	2	3	1	#NULL!	11148	6771.01	#NULL!	#NULL!	10015.1	7917.63	#NULL!	#NULL!	#NULL!	#NULL!	513	1	2	8	2	8	2	8	8	8	8	8	8	8	8	8	8	2	8	8	8	8	1	1	1
2015.01.07	B948909304	B9489093	2012	2	1	1	B948	1	6	72	2	3	1	#NULL!	11148	6771.01	#NULL!	#NULL!	10015.1	7917.63	#NULL!	#NULL!	#NULL!	#NULL!	513	1	2	8	2	8	2	8	8	8	8	8	8	8	8	8	8	2	8	8	8	8	1	1	1
2015.01.07	B948909901	B9489099	2012	2	1	1	B948	1	52	#NULL!	4	4	3	5	11148	13805.7	13365.7	#NULL!	22990.9	17947.2	#NULL!	17317.7	#NULL!	#NULL!	513	1	2	8	2	8	2	8	2	8	8	2	8	1	8	2	8	2	8	8	8	8	1	1	1
2015.01.07	B948909902	B9489099	2012	2	1	1	B948	2	51	#NULL!	4	4	2	5	11148	12553.7	7977.85	18440.4	10809.1	8568.91	25959.1	9085.62	21636.1	33266.4	513	1	2	8	2	8	2	8	2	8	8	2	8	1	8	2	8	2	8	8	8	8	1	1	1
2015.01.07	B948909903	B9489099	2012	2	1	1	B948	2	26	#NULL!	4	4	3	7	11148	15159.3	#NULL!	16689.2	18502.1	14141.2	#NULL!	#NULL!	20388.8	#NULL!	513	1	2	8	2	8	2	8	8	8	8	2	8	1	8	2	8	2	8	8	8	8	1	1	1
2015.01.07	B948910501	B9489105	2012	2	1	1	B948	2	52	#NULL!	4	4	4	7	11148	12553.7	7977.85	18440.4	10809.1	8568.91	12979.6	9085.62	21636.1	16633.2	513	1	2	8	2	8	2	8	2	8	8	2	8	1	8	2	8	1	1	2	1	2	1	1	1
2015.01.07	B948910503	B9489105	2012	2	1	1	B948	2	25	#NULL!	4	4	4	2	11148	15159.3	#NULL!	16689.2	18502.1	14141.2	#NULL!	#NULL!	20388.8	#NULL!	513	1	2	8	2	8	2	8	8	8	8	2	8	1	8	1	1	2	8	8	8	8	1	1	1
2015.01.07	B948910504	B9489105	2012	2	1	1	B948	2	23	#NULL!	4	4	4	1	11148	9136.49	#NULL!	#NULL!	8770.45	14766	#NULL!	#NULL!	#NULL!	#NULL!	513	1	2	8	1	2	1	2	8	8	8	2	8	1	8	1	1	1	1	2	1	1	1	1	1
2015.01.07	B948912601	B9489126	2012	2	1	1	B948	2	20	#NULL!	3	4	2	3	11148	9136.49	#NULL!	#NULL!	8770.45	14766	#NULL!	#NULL!	#NULL!	#NULL!	513	1	2	8	2	8	2	8	8	8	8	2	8	2	3	1	1	1	1	1	1	2	1	1	1
2015.01.07	B948915002	B9489150	2012	2	1	1	B948	2	44	#NULL!	1	2	3	6	11148	17776.4	19523.5	29349.4	#NULL!	#NULL!	31636.7	#NULL!	#NULL!	#NULL!	513	1	2	8	2	8	2	8	1	2	2	2	8	1	8	1	2	2	8	8	8	8	1	1	1
2015.01.07	B948915003	B9489150	2012	2	1	1	B948	2	9	#NULL!	2	2	1	#NULL!	11148	16438.5	#NULL!	#NULL!	#NULL!	#NULL!	#NULL!	#NULL!	#NULL!	#NULL!	513	1	2	8	2	8	2	8	8	8	8	8	8	8	8	8	8	2	8	8	8	8	1	1	1
2015.01.07	B948917101	B9489171	2012	2	1	1	B948	1	73	#NULL!	4	3	4	7	11148	3250.78	5661.14	38461.6	3603.86	4948.2	34724.1	6325.7	45641	41113	513	1	2	8	2	8	2	8	2	8	8	2	8	1	8	2	8	1	2	1	1	2	1	1	1
2015.01.07	B948920401	B9489204	2012	2	1	1	B948	2	76	#NULL!	1	1	1	7	11148	6229.16	6447.73	#NULL!	7042.86	5345.23	#NULL!	6834.88	#NULL!	#NULL!	513	1	2	8	2	8	2	8	2	8	8	2	8	1	8	2	8	2	8	8	8	8	1	1	1
2015.01.07	B948921301	B9489213	2012	2	1	1	B948	1	24	#NULL!	1	1	3	6	11148	19086.1	#NULL!	14345.5	26922.3	29528.7	#NULL!	#NULL!	20582.3	#NULL!	513	1	2	8	2	8	2	8	8	8	8	2	8	1	8	1	1	1	2	1	1	1	1	1	1
2015.01.07	B948922201	B9489222	2012	2	1	1	B948	1	26	#NULL!	4	4	3	7	11148	26964.6	#NULL!	11660.5	31347.3	26219.3	#NULL!	#NULL!	17697.1	#NULL!	513	1	2	8	2	8	2	8	8	8	8	2	8	1	8	2	8	2	8	8	8	8	1	1	1
2015.01.07	B948928202	B9489282	2012	2	1	1	B948	2	20	#NULL!	2	3	3	7	11148	13704.7	#NULL!	#NULL!	13155.7	21079.1	#NULL!	#NULL!	#NULL!	#NULL!	513	1	2	8	2	8	2	8	8	8	8	2	8	1	8	1	1	2	8	8	8	8	1	1	1
2015.01.07	B948928203	B9489282	2012	2	1	1	B948	2	51	#NULL!	2	3	1	3	11148	18730	7977.85	#NULL!	16213.6	12853.4	#NULL!	9085.62	#NULL!	#NULL!	513	1	2	8	2	8	2	8	2	8	8	1	1	1	8	2	8	1	2	1	1	2	1	1	1
2015.01.07	B948932101	B9489321	2012	2	1	1	B948	1	55	#NULL!	2	2	#NULL!	#NULL!	11148	14765.1	9203.94	#NULL!	16092.4	11292.7	#NULL!	10700.9	#NULL!	#NULL!	513	1	2	8	2	8	2	8	2	8	8	2	8	1	8	2	8	2	8	8	8	8	1	1	1
2015.01.07	B949894002	B9498940	2012	2	1	2	B949	2	37	#NULL!	3	3	3	7	5633.13	6234.23	#NULL!	#NULL!	6161.19	5265.47	#NULL!	#NULL!	#NULL!	#NULL!	502	1	2	8	2	8	2	8	8	8	8	2	8	1	8	2	8	2	8	8	8	8	1	1	1
2015.01.07	B949894003	B9498940	2012	2	1	2	B949	2	10	#NULL!	3	3	1	#NULL!	5633.13	7368.22	#NULL!	5336.76	9956.92	4506.24	#NULL!	#NULL!	6564.78	#NULL!	502	1	2	8	2	8	2	8	8	8	8	8	8	8	8	8	8	2	8	8	8	8	1	1	1
2015.01.07	B949894004	B9498940	2012	2	1	2	B949	1	9	#NULL!	3	3	1	#NULL!	5633.13	2960.14	#NULL!	#NULL!	3891.89	3947.23	#NULL!	#NULL!	#NULL!	#NULL!	502	1	2	8	2	8	2	8	8	8	8	8	8	8	8	8	8	2	8	8	8	8	1	1	1
2015.01.07	B949895501	B9498955	2012	2	1	2	B949	1	34	#NULL!	2	3	4	2	5633.13	18002.4	#NULL!	18291.7	24705.7	15803.7	#NULL!	#NULL!	22302.1	#NULL!	502	1	2	8	1	2	2	8	8	8	8	2	8	1	8	1	1	1	1	1	1	2	1	1	1
2015.01.07	B949895502	B9498955	2012	2	1	2	B949	2	34	#NULL!	3	3	#NULL!	#NULL!	5633.13	6230.39	#NULL!	#NULL!	6314.64	6117.7	#NULL!	#NULL!	#NULL!	#NULL!	502	1	2	8	1	2	2	8	8	8	8	2	8	1	8	1	1	1	1	2	1	2	1	1	1
2015.01.07	B949895503	B9498955	2012	2	1	2	B949	2	4	58	3	3	#NULL!	#NULL!	5633.13	4116.1	#NULL!	#NULL!	5126.99	5034.95	#NULL!	#NULL!	#NULL!	#NULL!	502	1	2	8	2	8	1	1	8	8	8	8	8	8	8	8	8	8	8	8	8	8	8	8	8
2015.01.07	B949895504	B9498955	2012	2	1	2	B949	1	3	39	3	3	#NULL!	#NULL!	5633.13	4056.28	#NULL!	#NULL!	4542.69	3760.97	#NULL!	#NULL!	#NULL!	#NULL!	502	1	8	8	8	8	8	8	8	8	8	8	8	8	8	8	8	8	8	8	8	8	8	8	8
2015.01.07	B949895505	B9498955	2012	2	1	2	B949	2	1	12	3	3	#NULL!	#NULL!	5633.13	4116.1	#NULL!	#NULL!	3845.24	5034.95	#NULL!	#NULL!	#NULL!	#NULL!	502	1	8	8	8	8	8	8	8	8	8	8	8	8	8	8	8	8	8	8	8	8	8	8	8
2015.01.07	B949899102	B9498991	2012	2	1	2	B949	2	39	#NULL!	1	2	3	5	5633.13	12468.5	#NULL!	#NULL!	6161.19	7020.63	#NULL!	#NULL!	#NULL!	#NULL!	502	1	2	8	1	2	2	8	8	8	8	2	8	1	8	2	8	1	2	2	2	1	1	1	1
2015.01.07	B949899103	B9498991	2012	2	1	2	B949	1	16	#NULL!	1	2	2	7	5633.13	11851.3	#NULL!	#NULL!	9211.55	12025.2	#NULL!	#NULL!	#NULL!	#NULL!	502	1	2	8	1	2	2	8	8	8	8	8	8	1	8	1	1	1	1	2	1	2	1	1	1
2015.01.07	B949899104	B9498991	2012	2	1	2	B949	1	15	#NULL!	1	2	1	7	5633.13	11851.3	#NULL!	14493.1	9211.55	12025.2	#NULL!	#NULL!	25440.4	#NULL!	502	1	2	8	2	8	2	8	8	8	8	8	8	1	8	2	8	1	1	2	1	2	1	1	1
2015.01.07	B949900301	B9499003	2012	2	1	2	B949	1	58	#NULL!	4	4	3	5	5633.13	7460.87	5852.75	#NULL!	8022.69	5629.85	#NULL!	7392.72	#NULL!	#NULL!	502	1	2	8	2	8	2	8	2	8	8	2	8	1	8	1	1	1	1	2	2	2	1	1	1
2015.01.07	B949900302	B9499003	2012	2	1	2	B949	2	56	#NULL!	4	4	2	7	5633.13	9871.48	3963.14	#NULL!	7170.2	3578.15	#NULL!	4853.93	#NULL!	#NULL!	502	1	2	8	2	8	2	8	2	8	8	2	8	1	8	2	8	1	2	1	1	2	1	1	1
2015.01.07	B949900303	B9499003	2012	2	1	2	B949	1	27	#NULL!	4	4	4	1	5633.13	26964.6	#NULL!	19813.1	28230.8	15963.6	#NULL!	#NULL!	26729	#NULL!	502	1	2	8	2	8	2	8	8	8	8	2	8	1	8	2	8	2	8	8	8	8	1	1	1
2015.01.07	B949900304	B9499003	2012	2	1	2	B949	2	30	#NULL!	4	4	4	1	5633.13	6230.39	#NULL!	#NULL!	6314.64	6117.7	#NULL!	#NULL!	#NULL!	#NULL!	502	1	2	8	2	8	2	8	8	8	8	2	8	1	8	1	1	2	8	8	8	8	1	1	1
2015.01.07	B949904801	B9499048	2012	2	1	2	B949	1	62	#NULL!	3	3	2	5	5633.13	10535.7	4013.17	9942.06	14589	5329.47	7758.34	5107.43	10093.6	8979.72	502	1	2	8	1	2	2	8	2	8	8	2	8	1	8	2	8	1	2	2	1	2	1	1	1
2015.01.07	B949904802	B9499048	2012	2	1	2	B949	2	59	#NULL!	3	3	2	3	5633.13	14807.2	3963.14	#NULL!	10755.3	5367.23	#NULL!	4853.93	#NULL!	#NULL!	502	1	2	8	2	8	2	8	1	3	2	2	8	1	8	2	8	1	2	2	1	2	1	1	1
2015.01.07	B949905702	B9499057	2012	2	1	2	B949	2	30	#NULL!	2	3	3	3	5633.13	6230.39	#NULL!	6408.8	6314.64	6117.7	#NULL!	#NULL!	6562.29	#NULL!	502	1	2	8	2	8	2	8	8	8	8	2	8	1	8	1	1	2	8	8	8	8	1	1	1
2015.01.07	B949907801	B9499078	2012	2	1	2	B949	2	76	#NULL!	3	1	1	7	5633.13	3147.62	4100.09	36090.9	3511.13	2664.8	45850.2	4721.88	31480.3	45420.4	502	1	2	8	2	8	2	8	2	8	8	2	8	2	3	2	8	2	8	8	8	8	1	1	1
2015.01.07	B949909601	B9499096	2012	2	1	2	B949	1	40	#NULL!	2	3	#NULL!	#NULL!	5633.13	18462.7	11907.6	14450.4	24282	14239.3	9326.62	20170.6	20235.1	14911.3	502	1	2	8	2	8	2	8	2	8	8	2	8	1	8	2	8	1	1	2	1	2	1	1	1
2015.01.07	B949909602	B9499096	2012	2	1	2	B949	2	30	#NULL!	2	3	4	7	5633.13	6230.39	#NULL!	#NULL!	6314.64	6117.7	#NULL!	#NULL!	#NULL!	#NULL!	502	1	2	8	2	8	2	8	8	8	8	2	8	1	8	2	8	1	2	1	1	2	1	1	1
2015.01.07	B949909603	B9499096	2012	2	1	2	B949	1	5	60	2	3	1	#NULL!	5633.13	2960.14	#NULL!	#NULL!	3891.89	3947.23	#NULL!	#NULL!	#NULL!	#NULL!	502	1	2	8	2	8	2	8	8	8	8	8	8	8	8	8	8	8	8	8	8	8	8	8	8
2015.01.07	B949911702	B9499117	2012	2	1	2	B949	2	51	#NULL!	2	3	3	3	5633.13	8457.93	10146.2	10444.4	10777.5	8543.85	12609.8	12553.6	21785.5	14774.2	502	1	2	8	2	8	2	8	2	8	8	2	8	1	8	2	8	1	2	1	1	2	1	1	1
2015.01.07	B949911703	B9499117	2012	2	1	2	B949	2	20	#NULL!	2	3	3	7	5633.13	6155.61	#NULL!	#NULL!	8744.79	14722.8	#NULL!	#NULL!	#NULL!	#NULL!	502	1	2	8	2	8	2	8	8	8	8	2	8	1	8	1	1	1	1	2	2	1	1	1	1
2015.01.07	B949911704	B9499117	2012	2	1	2	B949	1	23	#NULL!	2	3	3	6	5633.13	17639.7	#NULL!	12187.6	#NULL!	#NULL!	#NULL!	#NULL!	#NULL!	#NULL!	502	1	2	8	1	2	2	8	8	8	8	2	8	1	8	1	1	1	1	2	1	1	1	1	1
2015.01.07	B949913801	B9499138	2012	2	1	2	B949	1	31	#NULL!	2	3	3	5	5633.13	18002.4	#NULL!	9145.86	24705.7	15803.7	#NULL!	#NULL!	11151.1	#NULL!	502	1	2	8	2	8	2	8	8	8	8	2	8	1	8	2	8	1	2	1	1	2	1	1	1
2015.01.07	B949918301	B9499183	2012	2	1	2	B949	1	58	#NULL!	2	3	1	7	5633.13	9947.83	5852.75	#NULL!	16045.4	8444.78	#NULL!	7392.72	#NULL!	#NULL!	502	1	2	8	2	8	2	8	2	8	8	2	8	1	8	2	8	2	8	8	8	8	1	1	1
2015.01.07	B949918302	B9499183	2012	2	1	2	B949	2	48	#NULL!	2	3	2	7	5633.13	8181.1	7019.57	26074.9	11650	8992.52	16026.4	8250.4	23774.6	18301.1	502	1	2	8	2	8	2	8	2	8	8	2	8	1	8	2	8	2	8	8	8	8	1	1	1
2015.01.07	B949918304	B9499183	2012	2	1	2	B949	2	29	#NULL!	2	3	3	2	5633.13	10213.4	#NULL!	#NULL!	#NULL!	#NULL!	#NULL!	#NULL!	#NULL!	#NULL!	502	1	2	8	1	2	2	8	8	8	8	2	8	1	8	1	2	1	2	2	1	2	1	1	1
2015.01.07	B949918306	B9499183	2012	2	1	2	B949	2	3	42	3	3	1	#NULL!	5633.13	4116.1	#NULL!	#NULL!	3845.24	7552.43	#NULL!	#NULL!	#NULL!	#NULL!	502	1	8	8	8	8	8	8	8	8	8	8	8	8	8	8	8	8	8	8	8	8	8	8	8
2015.01.07	B949918307	B9499183	2012	2	1	2	B949	1	1	21	3	3	1	#NULL!	5633.13	4056.28	#NULL!	#NULL!	4542.69	5641.46	#NULL!	#NULL!	#NULL!	#NULL!	502	1	8	8	8	8	8	8	8	8	8	8	8	8	8	8	8	8	8	8	8	8	8	8	8
2015.01.07	B949921002	B9499210	2012	2	1	2	B949	2	40	#NULL!	4	4	3	2	5633.13	4972.59	6207.46	#NULL!	6479.72	5194.01	#NULL!	6912.38	#NULL!	#NULL!	502	1	2	8	2	8	2	8	2	8	8	2	8	1	8	2	8	2	8	8	8	8	1	1	1
2015.01.07	B949921003	B9499210	2012	2	1	2	B949	1	2	25	4	4	1	#NULL!	5633.13	4056.28	#NULL!	#NULL!	4542.69	3760.97	#NULL!	#NULL!	#NULL!	#NULL!	502	1	8	8	8	8	8	8	8	8	8	8	8	8	8	8	8	8	8	8	8	8	8	8	8
2015.01.07	B949925801	B9499258	2012	2	1	2	B949	1	67	#NULL!	1	1	1	6	5633.13	5682.76	7220.71	#NULL!	#NULL!	#NULL!	#NULL!	#NULL!	#NULL!	#NULL!	502	1	2	8	2	8	1	2	2	8	8	2	8	2	3	1	1	2	8	8	8	8	1	1	1
2015.01.07	B949926101	B9499261	2012	2	1	2	B949	1	52	#NULL!	3	4	4	3	5633.13	6976.1	8499.23	9656.85	11461.8	8947.34	14148.7	11963.9	9485.05	16175.1	502	1	2	8	2	8	2	8	2	8	8	2	8	1	8	2	8	1	1	2	1	1	1	1	1
2015.01.07	B949926102	B9499261	2012	2	1	2	B949	2	48	#NULL!	3	4	3	7	5633.13	6135.82	7019.57	#NULL!	5825.02	5995.01	#NULL!	8250.4	#NULL!	#NULL!	502	1	2	8	2	8	2	8	2	8	8	2	8	1	8	2	8	2	8	8	8	8	1	1	1
2015.01.07	B949926103	B9499261	2012	2	1	2	B949	1	22	#NULL!	3	4	3	7	5633.13	13229.8	#NULL!	9140.74	26922.3	20626.7	#NULL!	#NULL!	11657.5	#NULL!	502	1	2	8	2	8	2	8	8	8	8	2	8	1	8	2	8	2	8	8	8	8	1	1	1
2015.01.07	B949927603	B9499276	2012	2	1	2	B949	1	39	#NULL!	4	4	4	2	5633.13	8858.41	#NULL!	#NULL!	20056.3	18970.4	#NULL!	#NULL!	#NULL!	#NULL!	502	1	2	8	2	8	2	8	8	8	8	2	8	1	8	2	8	1	1	1	1	2	1	1	1
2015.01.07	B949929101	B9499291	2012	2	1	2	B949	1	41	#NULL!	1	1	1	6	5633.13	18462.7	11907.6	14450.4	#NULL!	#NULL!	9326.62	#NULL!	#NULL!	#NULL!	502	1	2	8	2	8	2	8	2	8	8	2	8	1	8	2	8	2	8	8	8	8	1	1	1
2015.01.07	B949929102	B9499291	2012	2	1	2	B949	2	39	#NULL!	1	1	4	5	5633.13	6234.23	#NULL!	#NULL!	#NULL!	#NULL!	#NULL!	#NULL!	#NULL!	#NULL!	502	1	2	8	2	8	1	2	8	8	8	2	8	1	8	2	8	2	8	8	8	8	1	1	1
2015.01.07	B949929103	B9499291	2012	2	1	2	B949	2	10	#NULL!	1	1	1	#NULL!	5633.13	7368.22	#NULL!	5336.76	#NULL!	#NULL!	#NULL!	#NULL!	#NULL!	#NULL!	502	1	2	8	2	8	2	8	8	8	8	8	8	8	8	8	8	2	8	8	8	8	1	1	1
2015.01.07	B949929104	B9499291	2012	2	1	2	B949	2	7	#NULL!	1	1	1	#NULL!	5633.13	7186.56	#NULL!	#NULL!	#NULL!	#NULL!	#NULL!	#NULL!	#NULL!	#NULL!	502	1	2	8	2	8	2	8	8	8	8	8	8	8	8	8	8	2	8	8	8	8	1	1	1
2015.01.07	B949931501	B9499315	2012	2	1	2	B949	1	58	#NULL!	4	4	2	3	5633.13	7460.87	5852.75	#NULL!	8022.69	5629.85	#NULL!	7392.72	#NULL!	#NULL!	502	1	2	8	2	8	1	2	2	8	8	2	8	2	3	1	1	2	8	8	8	8	1	1	1
2015.01.07	B949931502	B9499315	2012	2	1	2	B949	2	54	#NULL!	4	4	2	2	5633.13	6343.45	5073.09	10444.4	5388.74	4271.92	12609.8	6276.81	10892.8	14774.2	502	1	2	8	1	2	2	8	2	8	8	2	8	1	8	2	8	2	8	8	8	8	1	1	1
2015.01.07	B950914101	B9509141	2012	2	1	1	B950	1	65	#NULL!	1	1	1	6	7511.77	7577.95	5841	#NULL!	7117.66	3675.28	#NULL!	5601.33	#NULL!	#NULL!	513	1	2	8	2	8	2	8	1	1	2	2	8	1	8	2	8	1	1	1	1	2	1	1	1
2015.01.07	B950915901	B9509159	2012	2	1	1	B950	2	70	#NULL!	1	1	3	7	7511.77	2868.06	#NULL!	#NULL!	2745.15	3344.48	#NULL!	#NULL!	#NULL!	#NULL!	513	1	2	8	2	8	2	8	2	8	8	2	8	1	8	2	8	1	1	1	1	2	1	1	1
2015.01.07	B950916201	B9509162	2012	2	1	1	B950	1	53	#NULL!	3	4	4	3	7511.77	9302.62	13750.5	18463.9	#NULL!	#NULL!	23782.2	#NULL!	#NULL!	#NULL!	513	1	2	8	2	8	2	8	2	8	8	2	8	1	8	2	8	2	8	8	8	8	1	1	1
2015.01.07	B950916202	B9509162	2012	2	1	1	B950	2	54	#NULL!	3	4	3	1	7511.77	8458.98	8207.48	#NULL!	20289.5	16084.5	#NULL!	16617.1	#NULL!	#NULL!	513	1	2	8	1	2	2	8	2	8	8	2	8	1	8	2	8	1	1	1	1	2	1	1	1
2015.01.07	B950916203	B9509162	2012	2	1	1	B950	2	24	#NULL!	3	4	4	1	7511.77	6156.38	#NULL!	14835.3	#NULL!	#NULL!	#NULL!	#NULL!	#NULL!	#NULL!	513	1	2	8	2	8	2	8	8	8	8	2	8	1	8	2	8	1	1	1	1	1	1	1	1
2015.01.07	B950916501	B9509165	2012	2	1	1	B950	2	44	#NULL!	1	1	#NULL!	#NULL!	7511.77	6630.95	26114.7	35756.3	8132.42	6518.79	38746.8	27449.6	32036.7	40330.5	513	1	2	8	1	2	2	8	2	8	8	2	8	1	8	2	8	1	1	1	1	1	1	1	1
2015.01.07	B950916502	B9509165	2012	2	1	1	B950	2	54	#NULL!	1	1	#NULL!	#NULL!	7511.77	8458.98	#NULL!	#NULL!	6763.17	5361.51	#NULL!	#NULL!	#NULL!	#NULL!	513	1	2	8	2	8	2	8	2	8	8	2	8	1	8	2	8	2	8	8	8	8	1	1	1
2015.01.07	B950916503	B9509165	2012	2	1	1	B950	2	81	#NULL!	1	1	1	7	7511.77	4197.35	#NULL!	#NULL!	4406.67	3344.48	#NULL!	#NULL!	#NULL!	#NULL!	513	1	2	8	2	8	2	8	1	3	2	2	8	1	8	2	8	2	8	8	8	8	1	1	1
2015.01.07	B950916801	B9509168	2012	2	1	1	B950	1	72	#NULL!	2	1	2	6	7511.77	2190.45	#NULL!	#NULL!	2254.91	3096.05	#NULL!	#NULL!	#NULL!	#NULL!	513	1	2	8	2	8	2	8	2	8	8	2	8	1	8	2	8	1	1	2	1	2	1	1	1
2015.01.07	B950916802	B9509168	2012	2	1	1	B950	2	71	#NULL!	2	1	2	7	7511.77	2868.06	#NULL!	#NULL!	2745.15	3344.48	#NULL!	#NULL!	#NULL!	#NULL!	513	1	2	8	2	8	2	8	1	3	2	2	8	2	3	1	2	2	8	8	8	8	1	1	1
2015.01.07	B950916803	B9509168	2012	2	1	1	B950	1	2	35	1	1	1	#NULL!	7511.77	4772.68	#NULL!	#NULL!	5345.01	4720.24	#NULL!	#NULL!	#NULL!	#NULL!	513	1	8	8	8	8	8	8	8	8	8	8	8	8	8	8	8	8	8	8	8	8	8	8	8
2015.01.07	B950918001	B9509180	2012	2	1	1	B950	1	62	#NULL!	2	2	3	1	7511.77	9366.19	6492.7	#NULL!	12206.7	4459.19	#NULL!	6760.68	#NULL!	#NULL!	513	1	2	8	1	2	2	8	2	8	8	2	8	2	3	2	8	2	8	8	8	8	1	1	1
2015.01.07	B950918002	B9509180	2012	2	1	1	B950	2	58	#NULL!	2	2	1	3	7511.77	13163.6	6411.75	19631	8999.01	4490.78	19923.5	6425.12	19030.6	22554.7	513	1	2	8	1	2	2	8	2	8	8	2	8	2	3	2	8	1	1	1	1	2	1	1	1
2015.01.07	B950918902	B9509189	2012	2	1	1	B950	2	44	#NULL!	1	1	4	7	7511.77	9946.42	26114.7	35756.3	10843.2	10864.6	38746.8	27449.6	42715.5	40330.5	513	1	2	8	2	8	2	8	2	8	8	2	8	1	8	2	8	1	1	1	1	2	1	1	1
2015.01.07	B950918904	B9509189	2012	2	1	1	B950	2	3	47	1	1	1	#NULL!	7511.77	4843.07	#NULL!	#NULL!	4524.37	10531.9	#NULL!	#NULL!	#NULL!	#NULL!	513	1	8	8	8	8	8	8	8	8	8	8	8	8	8	8	8	8	8	8	8	8	8	8	8
2015.01.07	B950918905	B9509189	2012	2	1	1	B950	2	71	#NULL!	1	1	1	7	7511.77	4302.09	#NULL!	#NULL!	3660.21	5574.13	#NULL!	#NULL!	#NULL!	#NULL!	513	1	2	8	2	8	2	8	1	3	2	2	8	1	8	1	1	2	8	8	8	8	1	1	1
2015.01.07	B950919201	B9509192	2012	2	1	1	B950	2	71	#NULL!	3	1	#NULL!	#NULL!	7511.77	4302.09	#NULL!	#NULL!	4117.73	4459.3	#NULL!	#NULL!	#NULL!	#NULL!	513	1	2	8	2	8	2	8	1	3	2	2	8	2	3	1	1	2	8	8	8	8	1	1	1
2015.01.07	B950919202	B9509192	2012	2	1	1	B950	2	43	#NULL!	1	1	3	7	7511.77	9946.42	#NULL!	#NULL!	12198.6	8691.71	#NULL!	#NULL!	#NULL!	#NULL!	513	1	2	8	2	8	2	8	2	8	8	2	8	1	8	2	8	2	8	8	8	8	1	1	1
2015.01.07	B950919203	B9509192	2012	2	1	1	B950	2	6	78	1	1	1	#NULL!	7511.77	8455.83	#NULL!	#NULL!	10418.2	8472.17	#NULL!	#NULL!	#NULL!	#NULL!	513	1	2	8	2	8	2	8	8	8	8	8	8	8	8	8	8	2	8	8	8	8	1	1	1
2015.01.07	B950919801	B9509198	2012	2	1	1	B950	1	51	#NULL!	3	3	4	2	7511.77	9302.62	13750.5	#NULL!	#NULL!	#NULL!	#NULL!	#NULL!	#NULL!	#NULL!	513	1	2	8	2	8	2	8	2	8	8	2	8	1	8	2	8	2	8	8	8	8	1	1	1
2015.01.07	B950919803	B9509198	2012	2	1	1	B950	1	14	#NULL!	3	3	1	#NULL!	7511.77	17945.3	#NULL!	#NULL!	11984.1	8465.74	#NULL!	#NULL!	#NULL!	#NULL!	513	1	2	8	2	8	2	8	8	8	8	8	8	1	8	2	8	2	8	8	8	8	1	1	1
2015.01.07	B950919804	B9509198	2012	2	1	1	B950	2	12	#NULL!	3	3	1	#NULL!	7511.77	17339.1	#NULL!	37675.9	15620.6	7540.78	#NULL!	#NULL!	25103.8	#NULL!	513	1	2	8	2	8	2	8	8	8	8	8	8	1	8	2	8	2	8	8	8	8	1	1	1
2015.01.07	B950920101	B9509201	2012	2	1	1	B950	1	71	#NULL!	3	2	3	6	7511.77	3285.68	8736.13	74560	3382.37	4644.08	85056.2	8677.04	86667.8	93992	513	1	2	8	2	8	2	8	1	3	2	2	8	1	8	2	8	2	8	8	8	8	1	1	1
2015.01.07	B950920102	B9509201	2012	2	1	1	B950	2	71	#NULL!	4	2	3	7	7511.77	4302.09	9949.98	#NULL!	4117.73	5016.71	#NULL!	9375.48	#NULL!	#NULL!	513	1	1	1	2	8	2	8	1	3	2	2	8	1	8	2	8	2	8	8	8	8	2	1	1
2015.01.07	B950925201	B9509252	2012	2	1	1	B950	1	55	#NULL!	1	1	2	5	7511.77	9949.06	18937.7	16508.6	10068.9	7065.79	15496.6	19571.4	24708.9	17086.7	513	1	1	2	2	8	2	8	1	3	2	2	8	1	8	1	1	1	1	2	2	1	1	1	1
2015.01.07	B950925202	B9509252	2012	2	1	1	B950	2	44	#NULL!	1	1	2	6	7511.77	6630.95	#NULL!	#NULL!	8132.42	6518.79	#NULL!	#NULL!	#NULL!	#NULL!	513	1	2	8	2	8	2	8	2	8	8	2	8	1	8	1	1	2	8	8	8	8	1	1	1
2015.01.07	B950925203	B9509252	2012	2	1	1	B950	1	17	#NULL!	1	1	2	7	7511.77	13944.5	#NULL!	#NULL!	11561	11319.3	#NULL!	#NULL!	#NULL!	#NULL!	513	1	2	8	1	2	2	8	8	8	8	8	8	1	8	2	8	1	1	2	1	1	1	1	1
2015.01.07	B950925501	B9509255	2012	2	1	1	B950	1	66	#NULL!	1	1	3	7	7511.77	7577.95	5841	#NULL!	7117.66	3675.28	#NULL!	5601.33	#NULL!	#NULL!	513	1	2	8	2	8	2	8	2	8	8	2	8	2	3	2	8	2	8	8	8	8	1	1	1
2015.01.07	B950925801	B9509258	2012	2	1	1	B950	2	79	#NULL!	3	1	3	7	7511.77	4197.35	#NULL!	#NULL!	4406.67	3344.48	#NULL!	#NULL!	#NULL!	#NULL!	513	1	2	8	2	8	1	2	2	8	8	2	8	2	3	2	8	2	8	8	8	8	1	1	1
2015.01.07	B950927901	B9509279	2012	2	1	1	B950	1	64	#NULL!	2	3	2	5	7511.77	9366.19	6492.7	12672.8	12206.7	4459.19	13040.9	6760.68	12866	15408.3	513	1	2	8	2	8	2	8	2	8	8	2	8	1	8	2	8	2	8	8	8	8	1	1	1
2015.01.07	B950927902	B9509279	2012	2	1	1	B950	2	60	#NULL!	3	3	3	7	7511.77	8514.67	5218.84	#NULL!	7277.21	3393.98	#NULL!	5074.29	#NULL!	#NULL!	513	1	2	8	2	8	2	8	1	3	2	2	8	2	3	2	8	2	8	8	8	8	1	1	1
2015.01.07	B950929701	B9509297	2012	2	1	1	B950	2	74	#NULL!	1	1	1	7	7511.77	2868.06	#NULL!	69005.9	5490.31	6688.95	#NULL!	#NULL!	94086	#NULL!	513	1	2	8	2	8	2	8	1	2	2	2	8	1	8	1	1	2	8	8	8	8	1	1	1
2015.01.07	B951913501	B9519135	2012	2	1	2	B951	2	37	#NULL!	1	2	3	3	3635.02	8045.8	#NULL!	#NULL!	3962.01	4514.68	#NULL!	#NULL!	#NULL!	#NULL!	502	1	2	8	2	8	2	8	8	8	8	2	8	1	8	1	1	2	8	8	8	8	1	1	1
2015.01.07	B951913502	B9519135	2012	2	1	2	B951	1	7	#NULL!	1	2	1	#NULL!	3635.02	2528.15	#NULL!	#NULL!	2492.94	3384.41	#NULL!	#NULL!	#NULL!	#NULL!	502	1	2	8	2	8	2	8	8	8	8	8	8	8	8	8	8	1	1	2	1	2	1	1	1
2015.01.07	B951913503	B9519135	2012	2	1	2	B951	2	4	52	1	2	1	#NULL!	3635.02	3515.41	#NULL!	#NULL!	3284.08	4317.03	#NULL!	#NULL!	#NULL!	#NULL!	502	1	2	8	2	8	2	8	8	8	8	8	8	8	8	8	8	8	8	8	8	8	8	8	8
2015.01.07	B951915001	B9519150	2012	2	1	2	B951	2	48	#NULL!	2	3	2	7	3635.02	3959.4	4671.23	7237.62	3745.83	3855.15	9307.53	4492.06	13198.2	9300.02	502	1	2	8	2	8	2	8	1	3	2	2	8	1	8	1	2	2	8	8	8	8	1	1	1
2015.01.07	B951915002	B9519150	2012	2	1	2	B951	2	11	#NULL!	2	3	1	#NULL!	3635.02	6292.92	#NULL!	#NULL!	6377.88	2897.78	#NULL!	#NULL!	#NULL!	#NULL!	502	1	2	8	2	8	2	8	8	8	8	8	8	8	8	8	8	2	8	8	8	8	1	1	1
2015.01.07	B951917702	B9519177	2012	2	1	2	B951	2	45	#NULL!	3	3	3	6	3635.02	7918.8	9342.46	#NULL!	5618.75	5782.72	#NULL!	8984.11	#NULL!	#NULL!	502	1	2	8	2	8	2	8	1	2	2	2	8	1	8	1	1	1	1	2	2	2	1	1	1
2015.01.07	B951917704	B9519177	2012	2	1	2	B951	2	17	#NULL!	3	3	2	6	3635.02	8888.52	#NULL!	4975.31	25192.4	8605.38	#NULL!	#NULL!	17532.3	#NULL!	502	1	2	8	2	8	2	8	8	8	8	8	8	1	8	2	8	1	1	1	1	2	1	1	1
2015.01.07	B951918001	B9519180	2012	2	1	2	B951	2	38	#NULL!	3	3	3	3	3635.02	4022.9	#NULL!	#NULL!	3962.01	3386.01	#NULL!	#NULL!	#NULL!	#NULL!	502	1	2	8	2	8	2	8	8	8	8	2	8	1	8	2	8	2	8	8	8	8	1	1	1
2015.01.07	B951918002	B9519180	2012	2	1	2	B951	2	11	#NULL!	3	3	1	#NULL!	3635.02	6292.92	#NULL!	3646.35	6377.88	2897.78	#NULL!	#NULL!	7288.76	#NULL!	502	1	2	8	1	2	2	8	8	8	8	8	8	8	8	8	8	2	8	8	8	8	1	1	1
2015.01.07	B951918003	B9519180	2012	2	1	2	B951	1	9	#NULL!	3	3	1	#NULL!	3635.02	2528.15	#NULL!	#NULL!	2492.94	2538.31	#NULL!	#NULL!	#NULL!	#NULL!	502	1	2	8	2	8	2	8	8	8	8	8	8	8	8	8	8	2	8	8	8	8	1	1	1
2015.01.07	B951918601	B9519186	2012	2	1	2	B951	1	59	#NULL!	2	2	1	7	3635.02	4814.44	3894.76	#NULL!	6878.75	4827.11	#NULL!	4025.08	#NULL!	#NULL!	502	1	2	8	2	8	2	8	1	3	2	2	8	1	8	2	8	2	8	8	8	8	1	1	1
2015.01.07	B951918602	B9519186	2012	2	1	2	B951	2	53	#NULL!	2	2	3	7	3635.02	4093.38	3375.92	#NULL!	4620.37	3662.8	#NULL!	3417.5	#NULL!	#NULL!	502	1	2	8	2	8	1	2	2	8	8	2	8	1	8	1	2	1	1	1	1	2	1	1	1
2015.01.07	B951918603	B9519186	2012	2	1	2	B951	2	26	#NULL!	1	2	4	1	3635.02	4942.99	#NULL!	20990	#NULL!	#NULL!	#NULL!	#NULL!	#NULL!	#NULL!	502	1	2	8	2	8	2	8	8	8	8	2	8	2	3	2	8	1	2	1	2	2	1	1	1
2015.01.07	B951918604	B9519186	2012	2	1	2	B951	2	24	#NULL!	2	2	3	1	3635.02	2979.13	#NULL!	#NULL!	3748.95	6311.78	#NULL!	#NULL!	#NULL!	#NULL!	502	1	2	8	2	8	2	8	8	8	8	2	8	1	8	2	8	1	1	1	1	2	1	1	1
2015.01.07	B951920702	B9519207	2012	2	1	2	B951	2	33	#NULL!	1	2	3	7	3635.02	4020.43	#NULL!	14231.1	8121.38	5245.4	#NULL!	#NULL!	14572	#NULL!	502	1	1	2	2	8	2	8	8	8	8	2	8	1	8	2	8	2	8	8	8	8	1	1	1
2015.01.07	B951920703	B9519207	2012	2	1	2	B951	1	9	#NULL!	1	2	1	#NULL!	3635.02	2528.15	#NULL!	#NULL!	2492.94	3384.41	#NULL!	#NULL!	#NULL!	#NULL!	502	1	2	8	1	2	1	2	8	8	8	8	8	8	8	8	8	1	1	2	1	2	1	1	1
2015.01.07	B951920704	B9519207	2012	2	1	2	B951	2	4	50	1	2	1	#NULL!	3635.02	3515.41	#NULL!	#NULL!	3284.08	4317.03	#NULL!	#NULL!	#NULL!	#NULL!	502	1	2	8	2	8	2	8	8	8	8	8	8	8	8	8	8	8	8	8	8	8	8	8	8
2015.01.07	B951921301	B9519213	2012	2	1	2	B951	2	73	#NULL!	1	1	1	7	3635.02	1387.88	2728.44	40071.1	1406.55	1713.62	53256.2	2570.9	34952.1	46162.3	502	1	2	8	2	8	2	8	2	8	8	2	8	1	8	1	1	2	8	8	8	8	1	1	1
2015.01.07	B951921302	B9519213	2012	2	1	2	B951	1	15	#NULL!	1	1	1	7	3635.02	4048.72	#NULL!	4951.21	5923.58	5799.71	#NULL!	#NULL!	7061.51	#NULL!	502	1	2	8	2	8	2	8	8	8	8	8	8	1	8	2	8	2	8	8	8	8	1	1	1
2015.01.07	B951922501	B9519225	2012	2	1	2	B951	2	73	#NULL!	2	1	3	7	3635.02	1387.88	2728.44	#NULL!	1406.55	1713.62	#NULL!	2570.9	#NULL!	#NULL!	502	1	2	8	2	8	2	8	1	3	2	2	8	1	8	1	1	1	1	1	1	2	1	1	1
2015.01.07	B951923401	B9519234	2012	2	1	2	B951	2	60	#NULL!	1	1	3	7	3635.02	4120.33	2146.63	4511.71	3728.66	1738.99	5437.46	2087.17	4629.92	5283.25	502	1	2	8	2	8	2	8	2	8	8	2	8	1	8	2	8	2	8	8	8	8	1	1	1
2015.01.07	B951924001	B9519240	2012	2	1	2	B951	2	86	#NULL!	1	1	1	7	3635.02	2031.14	#NULL!	#NULL!	2257.86	1713.62	#NULL!	#NULL!	#NULL!	#NULL!	502	1	2	8	2	8	2	8	2	8	8	2	8	1	8	2	8	2	8	8	8	8	1	1	1
2015.01.07	B951925802	B9519258	2012	2	1	2	B951	2	78	#NULL!	4	4	1	7	3635.02	2708.18	#NULL!	#NULL!	3010.49	3427.25	#NULL!	#NULL!	#NULL!	#NULL!	502	1	2	8	2	8	2	8	1	3	2	2	8	1	8	1	1	2	8	8	8	8	1	1	1
2015.01.07	B951925804	B9519258	2012	2	1	2	B951	2	44	#NULL!	3	4	3	6	3635.02	4278.37	12392.4	27684.5	5555.79	6680.12	26774.9	11290.7	24804.5	23888	502	1	2	8	2	8	2	8	2	8	8	2	8	1	8	1	1	2	8	8	8	8	1	1	1
2015.01.07	B951926401	B9519264	2012	2	1	2	B951	2	74	#NULL!	2	1	3	7	3635.02	1387.88	2728.44	#NULL!	1406.55	1713.62	#NULL!	2570.9	#NULL!	#NULL!	502	1	2	8	2	8	2	8	2	8	8	2	8	1	8	1	2	2	8	8	8	8	1	1	1
2015.01.07	B951928801	B9519288	2012	2	1	2	B951	1	70	#NULL!	2	2	3	7	3635.02	2119.96	4791.16	36279.8	1155.36	3172.68	39183.8	4758.75	38268.4	37114.6	502	1	2	8	2	8	2	8	2	8	8	2	8	1	8	2	8	2	8	8	8	8	1	1	1
2015.01.07	B951930001	B9519300	2012	2	1	2	B951	1	59	#NULL!	1	2	3	6	3635.02	4814.44	3894.76	#NULL!	5159.06	3620.33	#NULL!	4025.08	#NULL!	#NULL!	502	1	2	8	2	8	2	8	2	8	8	2	8	1	8	2	8	2	8	8	8	8	1	1	1
2015.01.07	B951930002	B9519300	2012	2	1	2	B951	2	59	#NULL!	2	2	2	5	3635.02	6369.99	2637.3	#NULL!	4610.86	2300.96	#NULL!	2642.8	#NULL!	#NULL!	502	1	2	8	2	8	1	9	2	8	8	2	8	1	8	2	8	2	8	8	8	8	1	1	1
2015.01.07	B951930301	B9519303	2012	2	1	2	B951	2	85	#NULL!	2	1	1	3	3635.02	2031.14	#NULL!	#NULL!	2257.86	1713.62	#NULL!	#NULL!	#NULL!	#NULL!	502	1	2	8	2	8	2	8	1	3	2	2	8	3	3	1	1	2	8	8	8	8	1	1	1
2015.01.07	B951931201	B9519312	2012	2	1	2	B951	1	66	#NULL!	1	1	1	7	3635.02	3667.04	#NULL!	#NULL!	3646.91	1883.12	#NULL!	#NULL!	#NULL!	#NULL!	502	1	2	8	2	8	2	8	1	1	1	2	8	1	8	2	8	1	1	2	2	1	2	1	1
2015.01.07	B951931202	B9519312	2012	2	1	2	B951	2	70	#NULL!	1	1	1	7	3635.02	1387.88	5456.87	#NULL!	1406.55	1713.62	#NULL!	5141.8	#NULL!	#NULL!	502	1	2	8	2	8	2	8	1	3	1	2	8	3	3	1	3	1	1	1	1	2	1	1	1
2015.01.07	B951931501	B9519315	2012	2	1	2	B951	2	73	#NULL!	3	2	1	6	3635.02	2775.76	5456.87	#NULL!	2813.09	3427.25	#NULL!	5141.8	#NULL!	#NULL!	502	1	2	8	2	8	2	8	1	3	2	2	8	1	8	1	1	2	8	8	8	8	1	1	1
2015.01.07	B952913201	B9529132	2012	2	1	1	B952	1	71	#NULL!	3	2	1	6	9833.79	2867.56	#NULL!	43621.1	#NULL!	#NULL!	#NULL!	#NULL!	#NULL!	#NULL!	513	1	2	8	2	8	2	8	2	8	8	2	8	1	8	2	8	2	8	8	8	8	1	1	1
2015.01.07	B952913501	B9529135	2012	2	1	1	B952	1	66	#NULL!	2	2	1	6	9833.79	9920.43	7767.93	#NULL!	12423.8	6415.17	#NULL!	7449.19	#NULL!	#NULL!	513	1	2	8	2	8	2	8	1	2	2	2	8	1	8	1	3	2	8	8	8	8	1	1	1
2015.01.07	B952914702	B9529147	2012	2	1	1	B952	2	55	#NULL!	1	2	2	3	9833.79	17232.7	#NULL!	20559.5	15707.7	7838.62	#NULL!	#NULL!	23916.8	#NULL!	513	1	2	8	2	8	2	8	2	8	8	2	8	1	8	2	8	2	8	8	8	8	1	1	1
2015.01.07	B952914703	B9529147	2012	2	1	1	B952	2	29	#NULL!	1	2	4	3	9833.79	13372.3	#NULL!	#NULL!	19341.5	15444.2	#NULL!	#NULL!	#NULL!	#NULL!	513	1	2	8	1	2	1	2	8	8	8	1	1	1	8	1	1	1	1	1	1	2	1	1	1
2015.01.07	B952914704	B9529147	2012	2	1	1	B952	2	25	#NULL!	1	2	3	6	9833.79	13372.3	#NULL!	18928	19341.5	15444.2	#NULL!	#NULL!	24665.5	#NULL!	513	1	2	8	2	8	2	8	8	8	8	2	8	1	8	2	8	2	8	8	8	8	1	1	1
2015.01.07	B952915901	B9529159	2012	2	1	1	B952	1	78	#NULL!	1	1	#NULL!	#NULL!	9833.79	10233.5	#NULL!	#NULL!	10791	5404.13	#NULL!	#NULL!	#NULL!	#NULL!	513	1	2	8	2	8	2	8	2	8	8	2	8	3	3	1	3	2	8	8	8	8	1	2	1
2015.01.07	B952915902	B9529159	2012	2	1	1	B952	2	72	#NULL!	1	1	1	7	9833.79	3754.63	17643.3	#NULL!	4791.64	5837.75	#NULL!	16624.6	#NULL!	#NULL!	513	1	1	2	1	2	1	2	1	2	2	1	1	1	8	1	2	2	8	8	8	8	1	1	1
2015.01.07	B952917401	B9529174	2012	2	1	1	B952	2	63	#NULL!	1	1	1	6	9833.79	11146.7	6940.52	10849.3	12702.3	5924.16	12819.1	6748.28	13360.3	12455.6	513	1	1	2	2	8	1	2	2	8	8	2	8	1	8	1	1	2	8	8	8	8	1	1	1
2015.01.07	B952921601	B9529216	2012	2	1	1	B952	2	83	#NULL!	1	1	1	7	9833.79	5494.82	#NULL!	#NULL!	#NULL!	#NULL!	#NULL!	#NULL!	#NULL!	#NULL!	513	1	2	8	2	8	2	8	1	2	2	1	2	3	3	2	8	2	8	8	8	8	1	1	1
2015.01.07	B952928201	B9529282	2012	2	1	1	B952	2	26	#NULL!	2	3	4	3	9833.79	13372.3	#NULL!	#NULL!	19341.5	15444.2	#NULL!	#NULL!	#NULL!	#NULL!	513	1	2	8	2	8	2	8	8	8	8	1	2	1	8	2	8	2	8	8	8	8	1	1	1
2015.01.07	B952929402	B9529294	2012	2	1	1	B952	2	72	#NULL!	2	1	1	6	9833.79	3754.63	8821.63	#NULL!	4791.64	5837.75	#NULL!	8312.29	#NULL!	#NULL!	513	1	2	8	2	8	2	8	2	8	8	2	8	1	8	2	8	2	8	8	8	8	1	1	1
2015.01.07	B952930601	B9529306	2012	2	1	1	B952	1	72	#NULL!	3	2	3	1	9833.79	2867.56	7745.43	#NULL!	3935.93	5404.13	#NULL!	7693.05	#NULL!	#NULL!	513	1	2	8	2	8	2	8	2	8	8	2	8	2	3	1	1	2	8	8	8	8	1	1	1
2015.01.07	B952930602	B9529306	2012	2	1	1	B952	2	71	#NULL!	4	2	3	7	9833.79	3754.63	8821.63	84696	4791.64	5837.75	114187	8312.29	94086	126557	513	1	2	8	2	8	2	8	2	8	8	2	8	1	8	1	1	2	8	8	8	8	1	1	1
2015.01.07	B952930901	B9529309	2012	2	1	1	B952	2	80	#NULL!	3	1	1	7	9833.79	5494.82	#NULL!	#NULL!	#NULL!	#NULL!	#NULL!	#NULL!	#NULL!	#NULL!	513	1	1	2	2	8	2	8	1	3	1	1	2	1	8	2	8	2	8	8	8	8	1	1	1
2015.01.07	B952931201	B9529312	2012	2	1	1	B952	1	54	#NULL!	2	3	2	5	9833.79	12178.2	27447	25782.9	23325	19600.8	38744.2	30637.8	40518.7	38756.7	513	1	2	8	2	8	2	8	2	8	8	2	8	1	8	2	8	2	8	8	8	8	1	1	1
2015.01.07	B952931202	B9529312	2012	2	1	1	B952	2	50	#NULL!	2	3	3	1	9833.79	11073.8	#NULL!	#NULL!	11805.1	9358.46	#NULL!	#NULL!	#NULL!	#NULL!	513	1	2	8	2	8	1	2	1	3	2	2	8	1	8	2	8	2	8	8	8	8	1	1	1
2015.01.07	B952931203	B9529312	2012	2	1	1	B952	2	20	#NULL!	2	3	3	7	9833.79	8059.42	#NULL!	20715.8	9578.56	16126.6	#NULL!	#NULL!	33504.4	#NULL!	513	1	2	8	2	8	2	8	8	8	8	2	8	1	8	2	8	2	8	8	8	8	1	1	1
2015.01.07	B952931204	B9529312	2012	2	1	1	B952	1	16	#NULL!	2	3	#NULL!	#NULL!	9833.79	16226.6	#NULL!	#NULL!	19075.3	19757.7	#NULL!	#NULL!	#NULL!	#NULL!	513	1	2	8	2	8	2	8	8	8	8	8	8	1	8	2	8	2	8	8	8	8	1	1	1
2015.01.07	B952932101	B9529321	2012	2	1	1	B952	1	65	#NULL!	2	2	1	5	9833.79	14880.6	7767.93	23728	18635.7	9622.75	22455.7	7449.19	28688.9	22038.1	513	1	2	8	2	8	2	8	2	8	8	2	8	1	8	2	8	2	8	8	8	8	1	1	1
2015.01.07	B952932102	B9529321	2012	2	1	1	B952	2	66	#NULL!	3	2	1	7	9833.79	15830.9	5834.74	#NULL!	19628.5	7442.43	#NULL!	5536.71	#NULL!	#NULL!	513	1	1	2	2	8	2	8	1	1	2	2	8	1	8	1	1	1	1	1	1	2	1	1	1
2015.01.07	B953913201	B9539132	2012	2	1	1	B953	1	33	#NULL!	2	3	4	5	7996.4	20293.5	#NULL!	33093.5	#NULL!	#NULL!	#NULL!	#NULL!	#NULL!	#NULL!	513	1	2	8	2	8	2	8	8	8	8	2	8	1	8	2	8	2	8	8	8	8	1	1	1
2015.01.07	B953913202	B9539132	2012	2	1	1	B953	2	32	#NULL!	2	3	4	7	7996.4	8844.24	#NULL!	#NULL!	18078.3	13135.9	#NULL!	#NULL!	#NULL!	#NULL!	513	1	2	8	2	8	2	8	8	8	8	2	8	1	8	2	8	2	8	8	8	8	1	1	1
2015.01.07	B953913203	B9539132	2012	2	1	1	B953	1	2	32	2	3	1	#NULL!	7996.4	10696	#NULL!	#NULL!	5989.31	8075.52	#NULL!	#NULL!	#NULL!	#NULL!	513	1	8	8	8	8	8	8	8	8	8	8	8	8	8	8	8	8	8	8	8	8	8	8	8
2015.01.07	B953913802	B9539138	2012	2	1	1	B953	2	35	#NULL!	1	2	3	7	7996.4	17558.3	#NULL!	#NULL!	17639	11306	#NULL!	#NULL!	#NULL!	#NULL!	513	1	2	8	2	8	2	8	8	8	8	2	8	1	8	2	8	1	1	1	1	2	1	1	1
2015.01.07	B953913803	B9539138	2012	2	1	1	B953	1	8	#NULL!	1	2	1	#NULL!	7996.4	7805.6	#NULL!	#NULL!	4810.56	8475.46	#NULL!	#NULL!	#NULL!	#NULL!	513	1	2	8	2	8	2	8	8	8	8	8	8	8	8	8	8	1	1	1	1	2	1	2	1
2015.01.07	B953916201	B9539162	2012	2	1	1	B953	1	48	#NULL!	1	2	4	2	7996.4	20540.9	19380.9	#NULL!	22442.5	17410.7	#NULL!	29016.4	#NULL!	#NULL!	513	1	1	2	2	8	1	2	2	8	8	2	8	1	8	1	1	2	8	8	8	8	1	1	2
2015.01.07	B953916202	B9539162	2012	2	1	1	B953	2	47	#NULL!	1	2	3	3	7996.4	8709.99	14543.5	23587.4	8338.28	8581.62	33808	16316.6	34564.1	42225.9	513	1	2	8	2	8	2	8	2	8	8	1	2	1	8	2	8	2	8	8	8	8	1	1	1
2015.01.07	B953916203	B9539162	2012	2	1	1	B953	2	17	#NULL!	2	2	2	7	7996.4	17151.9	#NULL!	28802.2	25192.4	12770.5	#NULL!	#NULL!	30609.5	#NULL!	513	1	2	8	2	8	2	8	8	8	8	8	8	1	8	1	1	2	8	8	8	8	1	1	1
2015.01.07	B953916204	B9539162	2012	2	1	1	B953	2	15	#NULL!	2	2	2	7	7996.4	17151.9	#NULL!	#NULL!	25192.4	12770.5	#NULL!	#NULL!	#NULL!	#NULL!	513	1	2	8	2	8	2	8	8	8	8	8	8	1	8	1	1	2	8	8	8	8	2	2	1
2015.01.07	B953916205	B9539162	2012	2	1	1	B953	1	13	#NULL!	2	2	1	#NULL!	7996.4	10062.6	#NULL!	#NULL!	10251.3	7241.72	#NULL!	#NULL!	#NULL!	#NULL!	513	1	1	2	1	2	1	2	8	8	8	8	8	1	8	2	8	1	2	1	2	1	2	2	1
2015.01.07	B953917101	B9539171	2012	2	1	1	B953	2	38	#NULL!	3	3	4	5	7996.4	8849.68	#NULL!	11200	8819.5	7537.31	#NULL!	#NULL!	12781.1	#NULL!	513	1	2	8	2	8	2	8	8	8	8	2	8	1	8	1	1	2	8	8	8	8	1	1	1
2015.01.07	B953917103	B9539171	2012	2	1	1	B953	1	11	#NULL!	3	3	1	#NULL!	7996.4	17945.3	#NULL!	7682.54	9442.02	7241.72	#NULL!	#NULL!	8579.96	#NULL!	513	1	2	8	1	2	2	8	8	8	8	8	8	8	8	8	8	1	2	2	2	2	1	1	1
2015.01.07	B953917104	B9539171	2012	2	1	1	B953	1	6	76	3	3	1	#NULL!	7996.4	7805.6	#NULL!	#NULL!	4810.56	5650.31	#NULL!	#NULL!	#NULL!	#NULL!	513	1	2	8	2	8	1	2	8	8	8	8	8	8	8	8	8	1	1	2	1	1	1	2	1
2015.01.07	B953917402	B9539174	2012	2	1	1	B953	2	40	#NULL!	2	3	3	7	7996.4	14117.5	25721.9	22556	9275.46	11152.5	32418.4	27340.9	19487.7	36153.7	513	1	2	8	2	8	2	8	2	8	8	2	8	1	8	1	1	1	1	2	1	2	1	1	1
2015.01.07	B953917403	B9539174	2012	2	1	1	B953	1	18	#NULL!	2	3	2	7	7996.4	7812.7	#NULL!	9554.22	13186	19365.3	#NULL!	#NULL!	22191.6	#NULL!	513	1	2	8	2	8	2	8	8	8	8	8	8	1	8	2	8	2	8	8	8	8	1	1	1
2015.01.07	B953917701	B9539177	2012	2	1	1	B953	2	65	#NULL!	1	1	1	3	7996.4	17164	11237.1	#NULL!	9896.98	6484.13	#NULL!	12440.3	#NULL!	#NULL!	513	1	2	8	2	8	2	8	2	8	8	2	8	2	3	1	2	2	8	8	8	8	1	1	1
2015.01.07	B953918601	B9539186	2012	2	1	1	B953	1	77	#NULL!	3	1	3	7	7996.4	8321.43	7458.44	29558.9	7051.15	3531.21	35582.1	8642.66	40087.5	42128.9	513	1	2	8	2	8	2	8	2	8	8	2	8	1	8	1	1	1	1	1	1	2	1	1	1
2015.01.07	B953919501	B9539195	2012	2	1	1	B953	1	75	#NULL!	1	1	1	7	7996.4	8321.43	#NULL!	#NULL!	7051.15	3531.21	#NULL!	#NULL!	#NULL!	#NULL!	513	1	2	8	2	8	1	1	2	8	8	2	8	2	3	1	2	1	1	1	1	2	1	1	1
2015.01.07	B953923701	B9539237	2012	2	1	1	B953	1	71	#NULL!	3	2	1	7	7996.4	2331.77	#NULL!	#NULL!	2571.85	3531.21	#NULL!	#NULL!	#NULL!	#NULL!	513	1	2	8	2	8	2	8	2	8	8	1	2	2	3	1	2	1	2	2	2	2	1	2	1
2015.01.07	B953923702	B9539237	2012	2	1	1	B953	2	68	#NULL!	3	2	1	7	7996.4	8582.01	#NULL!	#NULL!	9896.98	3242.06	#NULL!	#NULL!	#NULL!	#NULL!	513	1	2	8	2	8	1	2	2	8	8	2	8	1	8	2	8	1	1	1	1	2	2	1	1
2015.01.07	B953924601	B9539246	2012	2	1	1	B953	2	53	#NULL!	1	2	3	3	7996.4	9004.72	10510.7	9448	7713.76	6115.09	13300.3	12413.5	12668.9	17044.2	513	1	2	8	2	8	2	8	2	8	8	2	8	1	8	2	8	2	8	8	8	8	1	1	1
2015.01.07	B953927302	B9539273	2012	2	1	1	B953	2	42	#NULL!	1	2	3	7	7996.4	14117.5	25721.9	#NULL!	18550.9	20683.3	#NULL!	27340.9	#NULL!	#NULL!	513	1	2	8	2	8	2	8	2	8	8	2	8	2	3	2	8	1	1	1	1	2	1	1	1
2015.01.07	B953927601	B9539276	2012	2	1	1	B953	1	73	#NULL!	1	1	1	7	7996.4	2331.77	#NULL!	#NULL!	2571.85	3531.21	#NULL!	#NULL!	#NULL!	#NULL!	513	1	2	8	2	8	2	8	2	8	8	2	8	1	8	2	8	2	8	8	8	8	1	1	1
2015.01.07	B953927602	B9539276	2012	2	1	1	B953	2	69	#NULL!	1	1	2	7	7996.4	8582.01	#NULL!	#NULL!	9896.98	3242.06	#NULL!	#NULL!	#NULL!	#NULL!	513	1	2	8	2	8	2	8	2	8	8	2	8	1	8	1	2	2	8	8	8	8	1	1	1
2015.01.07	B953928501	B9539285	2012	2	1	1	B953	1	57	#NULL!	1	1	1	7	7996.4	17960.5	#NULL!	15621	11484.1	21086	#NULL!	#NULL!	20040.4	#NULL!	513	1	2	8	2	8	2	8	2	8	8	2	8	1	8	2	8	1	1	1	1	2	1	1	1
2015.01.07	B953929401	B9539294	2012	2	1	1	B953	1	41	#NULL!	3	4	2	5	7996.4	18535.2	24670.7	13071.9	#NULL!	#NULL!	19674.7	#NULL!	#NULL!	#NULL!	513	1	2	8	2	8	2	8	2	8	8	2	8	1	8	2	8	2	8	8	8	8	1	1	1
2015.01.07	C921913201	C9219132	2012	3	1	2	C921	1	63	#NULL!	4	4	4	1	2596.47	1227.21	1982.42	#NULL!	1170.02	1791.49	#NULL!	2064.25	#NULL!	#NULL!	503	1	2	8	2	8	2	8	2	8	8	2	8	1	8	2	8	2	8	8	8	8	1	1	1
2015.01.07	C921913202	C9219132	2012	3	1	2	C921	2	63	#NULL!	4	4	4	7	2596.47	1406.06	1593.48	9988.58	1262.81	1363.54	12613.5	1549.34	10250.3	12255.8	503	1	2	8	1	1	2	8	1	2	1	2	8	2	3	2	8	1	1	1	1	2	2	2	1
2015.01.07	C921913801	C9219138	2012	3	1	2	C921	1	66	#NULL!	3	2	4	7	2596.47	1669.51	1783.44	#NULL!	1625.76	1476.55	#NULL!	1710.26	#NULL!	#NULL!	503	1	2	8	2	8	2	8	1	3	2	2	8	1	8	2	8	1	2	1	1	2	1	1	1
2015.01.07	C921913802	C9219138	2012	3	1	2	C921	2	63	#NULL!	2	2	3	7	2596.47	1406.06	1593.48	#NULL!	1262.81	1363.54	#NULL!	1549.34	#NULL!	#NULL!	503	1	2	8	2	8	2	8	2	8	8	2	8	1	8	1	1	2	8	8	8	8	1	1	1
2015.01.07	C921914701	C9219147	2012	3	1	2	C921	1	72	#NULL!	4	3	3	7	2596.47	927.574	1778.28	#NULL!	945.975	1243.84	#NULL!	1766.25	#NULL!	#NULL!	503	1	2	8	2	8	2	8	2	8	8	2	8	1	8	1	2	2	8	8	8	8	1	1	1
2015.01.07	C921914702	C9219147	2012	3	1	2	C921	2	64	#NULL!	4	3	3	7	2596.47	1406.06	1593.48	#NULL!	1262.81	1363.54	#NULL!	1549.34	#NULL!	#NULL!	503	1	1	2	2	8	2	8	2	8	8	2	8	1	8	2	8	2	8	8	8	8	1	1	1
2015.01.07	C921915301	C9219153	2012	3	1	2	C921	1	69	#NULL!	4	4	4	1	2596.47	2504.26	2675.16	#NULL!	1625.76	2214.83	#NULL!	2565.39	#NULL!	#NULL!	503	1	2	8	2	8	1	1	2	8	8	2	8	2	3	2	8	2	8	8	8	8	1	1	1
2015.01.07	C921915302	C9219153	2012	3	1	2	C921	2	64	#NULL!	4	4	3	7	2596.47	2109.09	2390.21	#NULL!	1262.81	2045.31	#NULL!	2324.01	#NULL!	#NULL!	503	1	2	8	2	8	2	8	2	8	8	2	8	1	8	2	8	2	8	8	8	8	1	1	1
2015.01.07	C921915901	C9219159	2012	3	1	2	C921	1	49	#NULL!	4	4	4	3	2596.47	14909.4	4620.89	15518.1	16356.1	6132.79	19949.2	5929.91	22048.3	24251.3	503	1	2	8	1	1	2	8	2	8	8	2	8	1	8	2	8	1	1	2	1	2	2	2	1
2015.01.07	C921915902	C9219159	2012	3	1	2	C921	2	45	#NULL!	4	4	3	7	2596.47	4560.43	3467.53	#NULL!	3647.93	3022.81	#NULL!	3334.52	#NULL!	#NULL!	503	1	2	8	2	8	1	2	2	8	8	2	8	2	3	2	8	2	8	8	8	8	1	1	1
2015.01.07	C921915903	C9219159	2012	3	1	2	C921	2	18	#NULL!	4	4	2	7	2596.47	6795.58	#NULL!	#NULL!	4551.79	4498.31	#NULL!	#NULL!	#NULL!	#NULL!	503	1	2	8	1	2	2	8	8	8	8	8	8	1	8	2	8	1	1	1	1	2	1	2	1
2015.01.07	C921915904	C9219159	2012	3	1	2	C921	2	16	#NULL!	4	4	2	7	2596.47	6795.58	#NULL!	#NULL!	4551.79	4498.31	#NULL!	#NULL!	#NULL!	#NULL!	503	1	2	8	1	2	2	8	8	8	8	8	8	1	8	1	1	1	1	1	1	2	2	1	1
2015.01.07	C921915905	C9219159	2012	3	1	2	C921	1	15	#NULL!	4	4	1	7	2596.47	2780.09	#NULL!	18497.7	3117.46	4547.54	#NULL!	#NULL!	19542.1	#NULL!	503	1	2	8	2	8	2	8	8	8	8	8	8	1	8	2	8	2	8	8	8	8	1	1	1
2015.01.07	C921916502	C9219165	2012	3	1	2	C921	2	40	#NULL!	1	2	#NULL!	#NULL!	2596.47	6861.99	#NULL!	#NULL!	6717.14	6547.34	#NULL!	#NULL!	#NULL!	#NULL!	503	1	2	8	1	1	2	8	2	8	8	2	8	1	8	1	1	2	8	8	8	8	1	1	1
2015.01.07	C921916505	C9219165	2012	3	1	2	C921	2	3	47	1	2	#NULL!	#NULL!	2596.47	10839.6	#NULL!	#NULL!	5896.27	6346.83	#NULL!	#NULL!	#NULL!	#NULL!	503	1	8	8	8	8	8	8	8	8	8	8	8	8	8	8	8	8	8	8	8	8	8	8	8
[truncated: 5,422 more rows]
[truncated: 79 more columns]
